# Supplementary material for: Understanding non-reducible N2 in the mechanism of Mo–nitrogenase
Source: Royal Society of Chemistry journal article supplement (doi:10.1039/d4dt03146f), 2025-01-01
Supplement: d4dt03146f1.pdf [file d4dt03146f1.pdf]

## Understanding non-reducible N<sub>2</sub> in the mechanism of Mo-nitrogenase

Ian Dance

School of Chemistry, UNSW Sydney, NSW 2052, Australia

E-mail: i.dance@unsw.edu.au

### 1. Protein model

The quantum computed protein model is an extract from crystal 3U7Q, shown in Chart S1. The six principal chains surrounding FeMo-co are highlighted with different colours, and the connecting hydrogen bonds are marked. Homocitrate, the His442 ligation of Mo, and relevant nearby water molecules are included (485 atoms total). Details, and the rationale for inclusion of amino acids and for truncation of uninvolved sidechains, are provided in the caption for Chart S1. Investigations of the protonation state of homocitrate using crystal structures at various pH (summarised in ref <sup>1</sup>), vibrational circular dichroism spectroscopy,<sup>2</sup> QM/MM calculations,<sup>1, 3</sup> and quantum refinement,<sup>3</sup> indicate that the coordinated alcoholate O7 atom is protonated, and hydrogen bonded to O1. This proton is now included in the model, although it is not shown in Chart S1.



Experimental and computational studies are in general agreement that the redox level of the [CFe<sub>7</sub>MoS<sub>9</sub>] core of resting FeMo-co cluster is described by net charge -1,<sup>1,6-8</sup> and so the net charge for the complete model in Chart S1 is -2 (-1 when the His195 side chain is protonated).

## 2. Computational constraints

Some constraints on the protein structure are required during optimization calculations because the modelled protein is incomplete and the bonding and dispersion influences of the complete protein outside the computational model are absent. The modelled protein must also maintain flexibility sufficient to accommodate the coordination of N<sub>2</sub> and of H<sub>2</sub>, and the diffusion of these molecules to and from FeMo-co. The constraints used here involved the C $\alpha$  atoms at the ends of the modelled protein chains, allowing movement of the intermediate residues and all sidechains. The constraints maintained the crystallographic distances between C<sup>c</sup> at the centre of FeMo-co and the C $\alpha$  atoms of residues 62, 95, 97, 191, 196, 229, 281, 355, 358, 380, 381, 443, and C<sup>c</sup>-O distances for the included water molecules. The lengths of the hydrogen bonds between the backside water HOH531 and Arg277, Tyr281 and Ser192 (Chart S1) were also constrained.

As previously explained<sup>9</sup> trial calculations on the modes of diffusion and coordination of N<sub>2</sub> / H<sub>2</sub> led to the conclusion that the front chain near Val70 should move away from FeMo-co. This is consistent with experimental data on mutation of amino acid 70 with smaller and larger side chains.<sup>10-12</sup> This expansion is controlled via the distance constraints C $\alpha$ (Val70) -- C<sup>c</sup> and C $\alpha$ (Val70) -- CZ(Arg96), here set to the values used in prior calculations of the intermediates and reaction steps.<sup>13,14</sup>

At the H<sub>2</sub> / N<sub>2</sub> exchange stage there are two unbound molecules, H<sub>2</sub> and reducible N<sub>2</sub>, and therefore calculation of exo-Fe2 N<sub>2</sub> binding trajectories required additional constraints for stability of the computational model: the positions of H<sub>2</sub> and reducible N<sub>2</sub> were fixed.

There were no constraints on bond distances or bond angles, including during transition state searches.

This overall strategy for constraints provides a computationally stable model, able to adjust to non-bonding dispersion interactions in the vicinity of the active site and the N<sub>2</sub>-pocket.

## 3. Density functional procedures

Density functional (DF) calculations use the DMol methodology of Delley,<sup>15-20</sup> with accurate DNP (double numerical plus polarisation) basis sets.<sup>18</sup> The real-space cutoff in the calculation of atomic basis sets was 9 au (4.8 Å), which gives results within 0.1% of the limit for larger extensions of the basis sets. The gradient-corrected functional PBE<sup>21</sup> was used because validation tests demonstrate that when used with the numerical basis sets of DMol it is more accurate than other commonly used functionals.<sup>22</sup> The Supplementary Information of ref <sup>14</sup> contains details of the validation tests.

The DMol method uses numerical solutions of DFT-free atoms as part of its basis set, and thus gives highly accurate DFT solutions for the separated atoms limit.<sup>18</sup> These numerical basis sets avoid the need for basis set superposition corrections, and provide reliable energies at long intermolecular distances. This advantage of the DMol methodology reduces the need for empirical treatment<sup>23</sup> of the long-range dispersion energies that are involved when the computational model is comprised of separate molecular units. This ability of the DMol methodology to incorporate long-range dispersion has been well demonstrated. Zhang *et al* reported very good agreement between the experimental interatomic potential energy curves and the DMol/PBE calculated potential energy curves for the inert-gas pairs He<sub>2</sub> Ne<sub>2</sub> and HeNe, and excellent agreement for the HeAr and NeAr pairs relevant to the nitrogenase active site.<sup>24</sup> Todorova and Delley used this DMol / DNP / PBE methodology to optimize the crystal structures of a comprehensive set over 40 molecular crystals in which dispersion and intermolecular interactions determine the crystal packing and crystal lattice parameters.<sup>20</sup> This set of molecular crystals ranged over amino acids, aliphatic and aromatic hydrocarbons, ice, H<sub>2</sub>S, S<sub>8</sub>, C<sub>60</sub>, and the inert gases Ne, Ar, Kr and Xe. The PBE functional overestimates lattice parameters by about 4%, while the PBE<sub>sol</sub> functional yields

lattice parameters with an average systematic error of less than 1%. Todorova and Delley emphasise that the DMol numerical basis sets have low BSSE because of the accurate tails of the molecular orbitals.

The calculations were all-electron, spin-unrestricted, with no imposed symmetry. The conductor-like screening model (COSMO)<sup>25-27</sup> was used with a dielectric constant of 5. Constraints on interatomic distances used the Lagrange Multiplier Algorithm. Control of electronic states was via the input spin populations for Fe1, Fe3, Fe4, Fe5 and Fe7. Output spin populations are calculated by the Mulliken method.<sup>28</sup>

#### 4. Determination of transition states

The following procedure is used to map potential energy surfaces and locate transition states between minima.<sup>5, 8, 29, 30</sup> A chemically reasonable geometry between energy minima is evaluated by observing the directions and extent of geometry change during an energy minimisation calculation that is restricted to small (ca 0.03 Å) atom displacements at each step. This reveals significant geometrical variables (i.e. which atoms are moving, which bond distances and angles are changing) and also the energy gradients involved. The trajectory of the structure in this calculation, towards one energy minimum, indicates that the energy saddle to the other energy minimum occurs in the opposite direction, towards the other energy minimum. Then, as illustrated in Figure S1, a point  $\Delta 1$  that is a short distance along this first optimization trajectory is selected, and from this structure a new atomic arrangement (**2** on Figure S1) on the other side of the saddle is located manually, and similarly evaluated with small-displacement energy minimisation steps. A point  $\Delta 2$  along the second optimisation trajectory is selected, and from this the key moving atoms are manually adjusted to be just back across the suspected saddle-point towards the opposite energy minimum. Repetition of this cycle, with subsequent short small-step energy minimisations, always starting from a point just on the other side of the barrier, allows the barrier to be straddled from opposing trial positions that progressively approach each other in geometry and energy as shown on Figure S1. The process involves choosing trial structures that in sequence are either side of the barrier, and progressively approaching each other. The requirement that trial structures oscillate across the barrier means that the energy minimisations are optimising all geometrical variables (including those that are not obviously part of the reaction step). The trial structures are moving down the ridge that they straddle, and approaching each other. The energy converges, and the gradients approach zero. Confirmation that this converged position is the transition state (TS) is obtained by calculating the complete energy minimisation trajectory of geometries from positions nudged just away from the TS, on either side, linking the TS with the connected reactant and product energy minima on the same potential energy surface. The electronic states are monitored throughout to confirm that reactant, TS and product are on the same potential energy surface. There can be substantial changes in the spin densities of Fe atoms that are changing coordination, and the continuity of these changes is checked.

This protocol requires human participation in choosing trial structures for each cycle of the calculation. An understanding and application of the relevant principles of coordination chemistry and stereochemistry improve the efficiency of the process. This methodology works well for complex reactions, such as those in the nitrogenase mechanism where multiple changes are occurring, sometimes in concert.

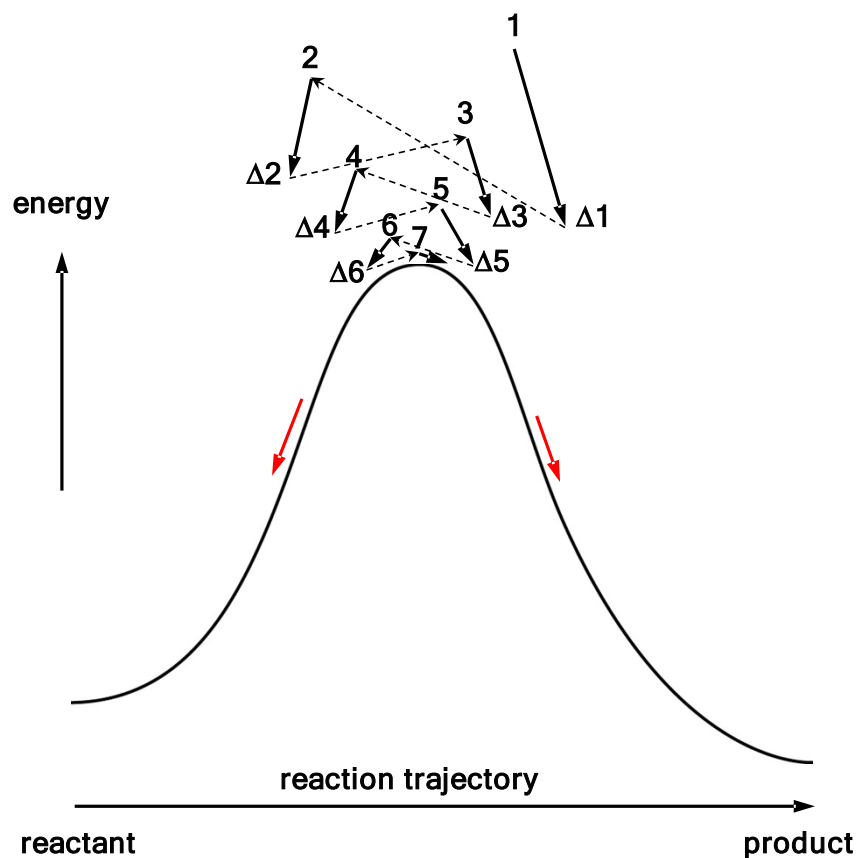

Figure S1. Generalised diagram of the procedure for locating a reaction transition state. The solid arrows represent the course of limited small-step energy reductions from the numbered positions, which are generated (broken arrows) from  $\Delta$  positions partway along the previous energy reduction, chosen according to geometry and energy gradient. The postulated trials necessarily oscillate across the barrier, and therefore optimise all other variables and decrease the energy and gradient while approaching the top of the barrier. Confirmation that the transition state, reactant and product are on the same potential energy surface is obtained by complete energy minimisations (red arrows).

## References

1. B. Benediktsson and R. Bjornsson, QM/MM Study of the Nitrogenase MoFe Protein Resting State: Broken-Symmetry States, Protonation States, and QM Region Convergence in the FeMoco Active Site, *Inorganic Chemistry*, 2017, **56**, 13417-13429, 10.1021/acs.inorgchem.7b02158.
2. L. Deng, H. Wang, C. H. Dapper, W. E. Newton, S. Shilov, S. Wang, S. P. Cramer and Z.-H. Zhou, Assignment of protonated R-homocitrate in extracted FeMo-cofactor of nitrogenase via vibrational circular dichroism spectroscopy, *Communications Chemistry*, 2020, **3**, 145, 10.1038/s42004-020-00392-z.
3. L. Cao, O. Caldararu and U. Ryde, Protonation States of Homocitrate and Nearby Residues in Nitrogenase Studied by Computational Methods and Quantum Refinement, *The Journal of Physical Chemistry B*, 2017, **121**, 8242-8262, 10.1021/acs.jpcc.7b02714.
4. I. Dance, New insights into the reaction capabilities of His195 adjacent to the active site of nitrogenase, *Journal of Inorganic Biochemistry*, 2017, **169**, 32-43, 10.1016/j.jinorgbio.2017.01.005.
5. I. Dance, The pathway for serial proton supply to the active site of nitrogenase: enhanced density functional modeling of the Grothuss mechanism, *Dalton Transactions*, 2015, **44**, 18167-18186, 10.1039/C5DT03223G.

6. T. Spatzal, J. Schlesier, E.-M. Burger, D. Sippel, L. Zhang, S. L. A. Andrade, D. C. Rees and O. Einsle, Nitrogenase FeMoco investigated by spatially resolved anomalous dispersion refinement, *Nat Commun*, 2016, **7**, 10902, 10.1038/ncomms10902.
7. R. Bjornsson, F. Neese and S. DeBeer, Revisiting the Mössbauer Isomer Shifts of the FeMoco Cluster of Nitrogenase and the Cofactor Charge, *Inorganic Chemistry*, 2017, **56**, 1470-1477, 10.1021/acs.inorgchem.6b02540.
8. I. Dance, Computational Investigations of the Chemical Mechanism of the Enzyme Nitrogenase, *Chembiochem*, 2020, **21**, 1671-1709, 10.1002/cbic.201900636.
9. I. Dance, Structures and reaction dynamics of N<sub>2</sub> and H<sub>2</sub> binding at FeMo-co, the active site of nitrogenase, *Dalton Transactions*, 2021, **50**, 18212-18237, 10.1039/d1dt03548g.
10. P. C. Dos Santos, R. Igarashi, H.-I. Lee, B. M. Hoffman, L. C. Seefeldt and D. R. Dean, Substrate Interactions with the Nitrogenase Active Site, *Acc. Chem. Res.*, 2005, **38**, 208-214.
11. L. C. Seefeldt, B. M. Hoffman and D. R. Dean, Mechanism of Mo-Dependent Nitrogenase, *Annu. Rev. Biochem.*, 2009, **78**, 701-722.
12. R. Sarma, B. M. Barney, S. Keable, D. R. Dean, L. C. Seefeldt and J. W. Peters, Insights into substrate binding at FeMo-cofactor in nitrogenase from the structure of an a-70Ile MoFe protein variant, *J. Inorg. Biochem.*, 2010, **104**, 385-389.
13. I. Dance, The activating capture of N<sub>2</sub> at the active site of Mo-nitrogenase, *Dalton Transactions*, 2024, **53**, 14193 - 14211, 10.1039/d4dt01866d.
14. I. Dance, The mechanism of Mo-nitrogenase: from N<sub>2</sub> capture to first release of NH<sub>3</sub>., *Dalton Trans*, 2024, DOI: 10.1039/d4dt02606c10.1039/d4dt02606c.
15. B. Delley, An all-electron numerical method for solving the local density functional for polyatomic molecules, *J. Chem. Phys.*, 1990, **92**, 508-517.
16. B. Delley, in *Modern density functional theory: a tool for chemistry*, eds. J. M. Seminario and P. Politzer, Elsevier, Amsterdam, 1995, vol. 2, pp. 221-254.
17. J. Baker, A. Kessi and B. Delley, The generation and use of delocalized internal coordinates in geometry optimization, *The Journal of Chemical Physics*, 1996, **105**, 192-212, doi:<http://dx.doi.org/10.1063/1.471864>.
18. B. Delley, From molecules to solids with the DMol3 approach, *J. Chem. Phys.*, 2000, **113**, 7756-7764.
19. J. Andzelm, R. D. King-Smith and G. Fitzgerald, Geometry optimization of solids using delocalized internal coordinates, *Chemical Physics Letters*, 2001, **335**, 321-326, [http://dx.doi.org/10.1016/S0009-2614\(01\)00030-6](http://dx.doi.org/10.1016/S0009-2614(01)00030-6).
20. T. Todorova and B. Delley, Molecular Crystals: A Test System for Weak Bonding<sup>†</sup>, *The Journal of Physical Chemistry C*, 2010, **114**, 20523-20530, 10.1021/jp1049759.
21. J. P. Perdew, K. Burke and M. Ernzerhof, Generalized Gradient Approximation Made Simple, *Phys. Rev. Lett.*, 1996, **77**, 3865-3868.
22. I. Dance, Evaluations of the Accuracies of DMol3 Density Functionals for Calculations of Experimental Binding Enthalpies of N<sub>2</sub>, CO, H<sub>2</sub>, C<sub>2</sub>H<sub>2</sub> at Catalytic Metal Sites *Molecular Simulation*, 2018, **44**, 568-581, doi.org/10.1080/08927022.2017.1413711.
23. S. Grimme, Semiempirical GGA-Type Density Functional Constructed with a Long-Range Dispersion Correction, *J. Comput. Chem.*, 2006, **27**, 1787-1799.
24. Y. Zhang, W. Pan and W. Yang, Describing van der Waals Interaction in diatomic molecules with generalized gradient approximations: The role of the exchange functional, *J. Chem. Phys.*, 1997, **107**, 7921-7925.

25. J. Andzelm, C. Kolmel and A. Klamt, Incorporation of solvent effects into density functional calculations of molecular energies and geometries, *J. Chem. Phys.*, 1995, **103**, 9312-9320.
26. A. Klamt, V. Jonas, T. Burger and J. C. W. Lohrenz, Refinement and Parametrization of COSMO-RS, *J. Phys. Chem. A*, 1998, **102**, 5074-5085.
27. B. Delley, The conductor-like screening model for polymers and surfaces, *Molecular Simulation*, 2006, **32**, 117-123.
28. R. S. Mulliken, Electronic population analysis on LCAO-MO molecular wavefunctions. II. Overlap populations, bond orders, and covalent bond energies, *J. Chem. Phys.*, 1955, **23**, 1833-1846.
29. I. Dance, A pragmatic method for location of transition states and calculation of reaction paths., *Molecular Simulation*, 2008, **34**, 923-929.
30. I. Dance, A pragmatic method for location of transition states and calculation of reaction paths: erratum., *Molecular Simulation*, 2011, **37**, 257.

## Atom coordinates, spin densities and pictures

Translation of Fe numbering

Fe1 = Fe143  
 Fe2 = Fe140  
 Fe3 = Fe141  
 Fe4 = Fe142  
 Fe5 = Fe139  
 Fe6 = Fe145  
 Fe7 = Fe144

The pictures are sections of the complete model chosen to show key atoms in the reaction zone. Note that some bonds in transition states are arbitrarily drawn.

| structure<br>S, electronic state<br>spin densities<br>picture                                                                                                               | filename<br>coordinates |              |               |                |
|-----------------------------------------------------------------------------------------------------------------------------------------------------------------------------|-------------------------|--------------|---------------|----------------|
| resting<br>2N2 associated<br>35, S=3/2<br><br>Fe( 139) -2.376<br>Fe( 140) -1.534<br>Fe( 141) -2.683<br>Fe( 142) 2.881<br>Fe( 143) 2.927<br>Fe( 144) 1.692<br>Fe( 145) 1.699 | bm522n2xdtb.car_3       |              |               |                |
|                                                                                                                                                                             | 1                       | -8.337267205 | -4.655466692  | 0.720058497 C  |
|                                                                                                                                                                             | 2                       | -8.773296451 | -5.761513368  | -0.248142562 C |
|                                                                                                                                                                             | 3                       | -9.035957016 | -2.631729551  | 1.923844823 C  |
|                                                                                                                                                                             | 4                       | -8.469988143 | -2.919034043  | 3.311947888 C  |
|                                                                                                                                                                             | 5                       | -8.282988026 | -4.491614429  | 5.173108411 C  |
|                                                                                                                                                                             | 6                       | -6.769964023 | -4.727242178  | 5.170925006 C  |
|                                                                                                                                                                             | 7                       | -4.775739617 | -5.278633910  | 3.875087528 C  |
|                                                                                                                                                                             | 8                       | -4.068585953 | -3.922244918  | 3.864928260 C  |
|                                                                                                                                                                             | 9                       | -4.138921381 | -1.587761271  | 3.151107677 C  |
|                                                                                                                                                                             | 10                      | -4.101934846 | -0.948988528  | 4.548801804 C  |
|                                                                                                                                                                             | 11                      | -5.262653836 | -0.534873855  | 6.641026245 C  |
|                                                                                                                                                                             | 12                      | -4.387267048 | -1.220720103  | 7.698608518 C  |
|                                                                                                                                                                             | 13                      | -3.789062001 | -3.323313570  | 8.803534803 C  |
|                                                                                                                                                                             | 14                      | -2.355225448 | -3.787382777  | 8.509235897 C  |
|                                                                                                                                                                             | 15                      | -0.800646012 | -4.606221703  | 6.780339288 C  |
|                                                                                                                                                                             | 16                      | 0.165559456  | -3.621955752  | 6.111253001 C  |
|                                                                                                                                                                             | 17                      | 0.428556657  | -1.650295791  | 4.643393678 C  |
|                                                                                                                                                                             | 18                      | 0.770421181  | -0.476904905  | 5.590109592 C  |
|                                                                                                                                                                             | 19                      | -0.218048260 | -1.193639075  | 3.320328521 C  |
|                                                                                                                                                                             | 20                      | 0.607134143  | -0.074793437  | 2.674756146 C  |
|                                                                                                                                                                             | 21                      | -0.386319246 | -2.388146772  | 2.374360321 C  |
|                                                                                                                                                                             | 22                      | -0.103462728 | 1.343792162   | 7.014186349 C  |
|                                                                                                                                                                             | 23                      | 0.084534260  | 0.938551168   | 8.492035289 C  |
|                                                                                                                                                                             | 24                      | -1.246756500 | 2.371356012   | 6.823377236 C  |
|                                                                                                                                                                             | 25                      | -1.128823689 | 3.523580107   | 7.827970531 C  |
|                                                                                                                                                                             | 26                      | -1.254486795 | 2.910432516   | 5.387073879 C  |
|                                                                                                                                                                             | 27                      | -0.797278671 | -0.158399062  | 10.473172565 C |
|                                                                                                                                                                             | 28                      | 0.542071853  | -0.745204323  | 10.870535403 C |
|                                                                                                                                                                             | 29                      | 4.480915058  | -12.084099984 | 4.330444561 C  |

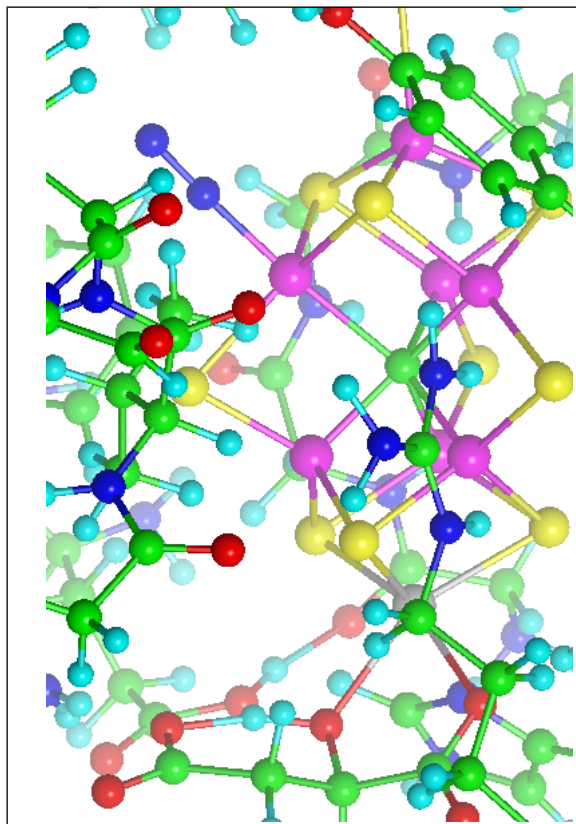

|     |              |               |              |   |
|-----|--------------|---------------|--------------|---|
| 30  | 5.206982446  | -10.867257355 | 3.760347809  | C |
| 31  | 5.642773521  | -8.444307563  | 4.178821196  | C |
| 32  | 6.810795936  | -8.187253126  | 5.150214929  | C |
| 33  | 4.573123903  | -7.344017266  | 4.278652080  | C |
| 34  | 5.112268005  | -5.946920138  | 3.964542348  | C |
| 35  | 3.977386236  | -4.935586993  | 3.798888615  | C |
| 36  | 4.237860082  | -2.438928334  | 3.957998733  | C |
| 37  | 9.172008161  | -7.559390612  | 5.333720900  | C |
| 38  | 9.560924746  | -6.097016596  | 5.350347680  | C |
| 39  | -5.465426077 | -2.213419329  | -1.966074689 | C |
| 40  | -5.713750962 | -0.746631088  | -1.570393616 | C |
| 41  | -3.965769670 | -2.523178927  | -1.765357635 | C |
| 42  | -3.579872976 | -4.016014997  | -1.832637061 | C |
| 43  | -3.220870884 | -4.540088271  | -3.222757279 | C |
| 44  | -5.850750874 | 1.523290636   | -2.522548008 | C |
| 45  | -6.967739309 | 2.106759258   | -1.646625599 | C |
| 46  | -5.833147957 | 2.128398328   | -3.932985359 | C |
| 47  | -9.249019966 | 1.826327455   | -0.796077615 | C |
| 48  | -8.974214940 | 1.805100365   | 0.711857581  | C |
| 49  | -7.494157660 | 1.084437042   | 2.528040179  | C |
| 50  | -6.266538949 | 1.929510498   | 2.865843302  | C |
| 51  | -4.522364528 | 3.468149277   | 2.111581046  | C |
| 52  | -4.919731571 | 4.812851377   | 2.769465040  | C |
| 53  | -3.757046921 | 3.826252203   | 0.828208938  | C |
| 54  | -3.133267574 | 2.698778138   | 0.068183859  | C |
| 55  | -2.686468631 | 1.444290812   | 0.403375784  | C |
| 56  | -2.243920043 | 1.753295624   | -1.749705540 | C |
| 57  | -6.591924164 | 6.629557641   | 2.755646050  | C |
| 58  | -6.644626461 | 6.754260458   | 4.276913153  | C |
| 59  | -7.996644452 | 6.823709623   | 2.140494895  | C |
| 60  | -8.482112730 | 8.237047505   | 2.007504405  | C |
| 61  | -8.389221805 | 9.313415205   | 2.868431412  | C |
| 62  | -9.490076378 | 9.886613182   | 1.032200446  | C |
| 63  | 8.939935294  | 0.670023357   | 4.367271263  | C |
| 64  | 9.867271606  | -0.526035690  | 4.270411492  | C |
| 65  | 7.515500929  | 0.164456143   | 4.017931003  | C |
| 66  | 6.465584131  | 1.246111122   | 4.118522096  | C |
| 67  | 5.799549703  | 1.499774532   | 5.331276095  | C |
| 68  | 6.114113440  | 2.020620614   | 2.999690438  | C |
| 69  | 4.806883284  | 2.480349329   | 5.426533246  | C |
| 70  | 5.135613558  | 3.012269153   | 3.082802278  | C |
| 71  | 4.476390250  | 3.233438379   | 4.294835980  | C |
| 72  | 5.974511914  | 6.318690239   | -0.770922963 | C |
| 73  | 5.066527008  | 7.525833681   | -1.055016854 | C |
| 74  | 5.123528989  | 5.092091729   | -0.450191627 | C |
| 75  | 4.327087630  | 9.168992721   | -2.745015795 | C |
| 76  | 2.856133800  | 8.907277415   | -3.077523780 | C |
| 77  | 1.070247767  | 7.170945355   | -3.170592862 | C |
| 78  | 0.421290182  | 6.855921175   | -1.797012989 | C |
| 79  | 1.099094641  | 5.935683999   | -4.103376738 | C |
| 80  | -0.196137948 | 5.160804548   | -4.376577378 | C |
| 81  | -1.206978264 | 5.806925368   | -5.337235391 | C |
| 82  | -2.579165346 | 7.859442609   | -4.969988031 | C |
| 83  | 0.631553588  | 5.897055081   | 0.442140362  | C |
| 84  | 0.506134904  | 7.150582705   | 1.319939323  | C |
| 85  | 1.463124526  | 4.861698330   | 1.229201518  | C |
| 86  | 1.770635131  | 9.060052890   | 2.181415487  | C |
| 87  | 1.326724446  | 10.471848822  | 1.837857032  | C |
| 88  | 0.206794054  | 11.892255886  | 0.203469625  | C |
| 89  | -1.054868877 | 12.574176369  | 0.787164437  | C |
| 90  | 0.181513453  | 11.922701118  | -1.327886512 | C |
| 91  | -1.000846204 | 11.188917911  | -1.950845611 | C |
| 92  | -3.173844970 | 12.281818044  | 1.983046392  | C |
| 93  | -3.060724167 | 13.368231286  | 3.043314231  | C |
| 94  | -4.013359034 | 11.090296121  | 2.526541608  | C |
| 95  | -4.255869531 | 10.033252535  | 1.472839975  | C |
| 96  | -5.366326300 | 10.119844571  | 0.618591498  | C |
| 97  | -3.353442926 | 8.973495703   | 1.278052796  | C |
| 98  | -5.558074654 | 9.197573956   | -0.413362422 | C |
| 99  | -3.511549045 | 8.060633772   | 0.231248383  | C |
| 100 | -4.612602183 | 8.191096615   | -0.611461215 | C |
| 101 | 4.412549454  | -4.318981028  | -8.556543630 | C |
| 102 | 2.989486458  | -3.926403546  | -8.194943253 | C |
| 103 | 1.596825242  | -2.277030930  | -6.964580021 | C |
| 104 | 1.277166004  | -0.891731827  | -7.536104130 | C |
| 105 | 1.862310721  | 1.491171264   | -7.444700333 | C |
| 106 | 3.129949242  | 2.338286037   | -7.502376173 | C |
| 107 | 5.434640247  | 2.726930197   | -6.848767799 | C |
| 108 | 6.069605109  | 2.986772480   | -8.199028188 | C |
| 109 | -2.229453357 | -3.241489196  | -9.358849682 | C |
| 110 | -3.171797110 | -2.053646769  | -9.132462313 | C |
| 111 | -1.973858468 | -3.966800229  | -8.017541545 | C |



|     |               |               |              |    |
|-----|---------------|---------------|--------------|----|
| 112 | -1.376120519  | -5.368139750  | -8.243010197 | C  |
| 113 | -0.862242846  | -5.939607547  | -6.939969510 | C  |
| 114 | -3.419607074  | 0.289898205   | -8.489902272 | C  |
| 115 | -2.769864545  | 1.532169903   | -9.064249757 | C  |
| 116 | -3.908469859  | 0.427526270   | -7.027838268 | C  |
| 117 | -2.797085695  | 0.252723854   | -6.025638056 | C  |
| 118 | -1.920755316  | 1.308351598   | -5.717013255 | C  |
| 119 | -2.557056796  | -1.010261434  | -5.459030750 | C  |
| 120 | -0.806843034  | 1.086386145   | -4.898973545 | C  |
| 121 | -1.445430960  | -1.229936356  | -4.638779953 | C  |
| 122 | -0.555900176  | -0.185470707  | -4.371161642 | C  |
| 123 | 7.604299969   | -6.975348341  | -4.060710152 | C  |
| 124 | 8.692184021   | -7.175838728  | -2.996568682 | C  |
| 125 | 6.208927681   | -7.160951549  | -3.445409098 | C  |
| 126 | 5.045333653   | -6.845356123  | -4.330923137 | C  |
| 127 | 4.735929250   | -7.422571621  | -5.545917907 | C  |
| 128 | 3.059127874   | -6.129684996  | -4.900993047 | C  |
| 129 | 9.637313155   | -8.511792425  | -1.211351520 | C  |
| 130 | 11.048608288  | -8.388721368  | -1.740055609 | C  |
| 131 | -0.156655041  | -6.796834837  | -0.125820272 | C  |
| 132 | 1.296537212   | -7.056271578  | 0.317405584  | C  |
| 133 | 2.299633665   | -7.317342347  | -0.837791899 | C  |
| 134 | 2.134775402   | -8.749990323  | -1.405008834 | C  |
| 135 | 3.233314042   | -9.192819926  | -2.377117364 | C  |
| 136 | 3.148172790   | -10.670684326 | -2.817806951 | C  |
| 137 | 3.738593178   | -7.154995345  | -0.319886650 | C  |
| 138 | 3.619689957   | -1.055593197  | -1.805745599 | C  |
| 139 | 3.943254233   | -2.335831982  | -3.385036788 | Fe |
| 140 | 2.085629398   | 0.427702319   | -1.316548669 | Fe |
| 141 | 4.955459282   | 0.026748863   | -0.777325157 | Fe |
| 142 | 4.202877241   | 0.211931679   | -3.262188265 | Fe |
| 143 | 4.036842260   | 2.314578331   | -1.668816520 | Fe |
| 144 | 4.568887113   | -2.503828044  | -0.885917536 | Fe |
| 145 | 2.163907446   | -2.302855166  | -1.558510150 | Fe |
| 146 | -7.091448383  | -6.914502195  | -0.163787583 | H  |
| 147 | -7.123456432  | -5.904523956  | -1.444963476 | H  |
| 148 | -10.243338261 | -3.878282739  | 0.683494489  | H  |
| 149 | -9.414939443  | -5.312286982  | -1.023642097 | H  |
| 150 | -9.421466496  | -6.449887005  | 0.320493105  | H  |
| 151 | -8.299120505  | -1.993649117  | 1.413772441  | H  |
| 152 | -9.432651653  | -4.724881240  | 3.369779550  | H  |
| 153 | -9.962780316  | -2.054558315  | 2.042244976  | H  |
| 154 | -8.781611652  | -5.418186908  | 5.487479742  | H  |
| 155 | -6.786956717  | -5.192401939  | 3.159453453  | H  |
| 156 | -8.480205717  | -3.721515469  | 5.930571314  | H  |
| 157 | -3.110746600  | -1.581668157  | 2.770137701  | H  |
| 158 | -5.522845767  | -3.145649598  | 2.634949116  | H  |
| 159 | -4.553693470  | -5.810152330  | 2.940223499  | H  |
| 160 | -4.937859810  | 0.511812650   | 6.586775509  | H  |
| 161 | -6.023499477  | -1.595831465  | 4.929743715  | H  |
| 162 | -4.362390309  | -5.857508995  | 4.709514479  | H  |
| 163 | -4.760012122  | -0.980796381  | 2.477963639  | H  |
| 164 | -5.101763948  | -3.078883622  | 7.131370226  | H  |
| 165 | -6.308875233  | -0.557617877  | 6.975699576  | H  |
| 166 | -0.962428767  | -3.202256674  | 2.836984449  | H  |
| 167 | -0.896693268  | -2.076466851  | 1.451288096  | H  |
| 168 | 0.592012471   | -2.784422264  | 2.062692139  | H  |
| 169 | -1.212647199  | -0.784350725  | 3.569683747  | H  |
| 170 | -4.385856645  | -4.219340383  | 9.028803160  | H  |
| 171 | -1.379929583  | 2.107328659   | 4.647666844  | H  |
| 172 | -1.728838920  | -0.098070834  | 8.560740189  | H  |
| 173 | -1.179497737  | 3.179843774   | 8.871090459  | H  |
| 174 | 0.154479746   | 0.228003208   | 1.720815587  | H  |
| 175 | 1.628704712   | -0.408364614  | 2.442328332  | H  |
| 176 | 8.935096675   | 1.004909977   | 5.422240618  | H  |
| 177 | -2.080226683  | 3.625284198   | 5.252920414  | H  |
| 178 | -1.948215561  | 4.240062893   | 7.668362674  | H  |
| 179 | -0.310692384  | 3.436600272   | 5.169270908  | H  |
| 180 | -0.176181705  | 4.060527769   | 7.693446189  | H  |
| 181 | -2.203871761  | 1.849283024   | 7.004203861  | H  |
| 182 | 0.851361855   | 1.812948109   | 6.736495463  | H  |
| 183 | -1.231774991  | -0.073246949  | 5.853944921  | H  |
| 184 | 0.673551621   | 0.813667874   | 3.321379028  | H  |
| 185 | 1.798216888   | 4.069709859   | 0.543760080  | H  |
| 186 | 0.791611202   | 4.413349003   | 1.978314520  | H  |
| 187 | 2.804515379   | 4.964690480   | 2.667068237  | H  |
| 188 | 3.090360150   | 4.251591705   | 5.197771579  | H  |
| 189 | 4.854151123   | 3.586924863   | 2.200627446  | H  |
| 190 | 6.583943309   | 1.823883946   | 2.033232207  | H  |
| 191 | 6.043290951   | 0.905782099   | 6.215797286  | H  |
| 192 | -1.389866950  | -2.684729510  | 5.148559256  | H  |
| 193 | -0.974695225  | -5.434904931  | 6.076105248  | H  |

|     |               |              |               |   |
|-----|---------------|--------------|---------------|---|
| 194 | -0.283065319  | -5.004518193 | 7.660098543   | H |
| 195 | -2.796932604  | -3.939553074 | 6.493423378   | H |
| 196 | -3.741135264  | -2.708853659 | 9.710749113   | H |
| 197 | 4.280264389   | 2.641928968  | 6.370570282   | H |
| 198 | 1.389873251   | -2.123314097 | 4.411787999   | H |
| 199 | -1.005200710  | 0.719772042  | 11.105588585  | H |
| 200 | -1.560289535  | -0.923256272 | 10.684096104  | H |
| 201 | 1.069356345   | -1.306662697 | 10.065314086  | H |
| 202 | 10.021792138  | -8.161279524 | 4.976958290   | H |
| 203 | -1.970214241  | -5.830072997 | -4.185080595  | H |
| 204 | 0.982931331   | -6.129533520 | -1.744064252  | H |
| 205 | -2.156131038  | -6.038711543 | -8.630479996  | H |
| 206 | -0.560989880  | -5.320067077 | -8.979670995  | H |
| 207 | -2.914324406  | -4.067997908 | -7.454270016  | H |
| 208 | -2.131257131  | 1.343708855  | -9.958860397  | H |
| 209 | -2.819442095  | -3.921448558 | -9.992112485  | H |
| 210 | -3.386316887  | -1.951455658 | -2.508487657  | H |
| 211 | -4.415664822  | -4.635856862 | -1.463512667  | H |
| 212 | -1.586203055  | -0.826021312 | -8.585417565  | H |
| 213 | -4.323131373  | 0.147150101  | -9.118469095  | H |
| 214 | -0.372243211  | -2.333519037 | -9.551202596  | H |
| 215 | -1.654750335  | -5.702365988 | -2.449414583  | H |
| 216 | -1.302683265  | -3.349198876 | -7.400521204  | H |
| 217 | -0.561182661  | -3.688681254 | -10.464350567 | H |
| 218 | -6.834871577  | -2.833433497 | -3.383146939  | H |
| 219 | -3.682994249  | -2.142724637 | -0.773262060  | H |
| 220 | 0.933508125   | -5.315999451 | -7.446667120  | H |
| 221 | -2.740992662  | -4.203910777 | -1.147471308  | H |
| 222 | -3.867289389  | 2.966274626  | 2.837814042   | H |
| 223 | -2.697615365  | 0.920211922  | 1.351184012   | H |
| 224 | -8.328431449  | 1.479951075  | 3.124281485   | H |
| 225 | -7.304091910  | 0.588876680  | 0.462330013   | H |
| 226 | -6.740160712  | 4.702292100  | 1.829623985   | H |
| 227 | -7.919109449  | 9.439121003  | 3.837457703   | H |
| 228 | -6.941305984  | 5.810620648  | 4.795573830   | H |
| 229 | -8.722421245  | 6.208871601  | 2.702774306   | H |
| 230 | -5.895502990  | 7.388029022  | 2.364752516   | H |
| 231 | -10.035319359 | 10.510495660 | 0.328422026   | H |
| 232 | -2.967306831  | 4.539856549  | 1.115491810   | H |
| 233 | -4.440380365  | 4.361643763  | 0.150588787   | H |
| 234 | -9.138049664  | 11.297391129 | 2.588281922   | H |
| 235 | -7.969949809  | 6.406927109  | 1.121541802   | H |
| 236 | -6.057240704  | 2.573123259  | 0.895604776   | H |
| 237 | -7.306966187  | 0.061307475  | 2.886369853   | H |
| 238 | -9.568696046  | 2.850055418  | -1.033877416  | H |
| 239 | -1.867925952  | 1.596494164  | -2.758011704  | H |
| 240 | -10.093397158 | 1.154831862  | -0.999447981  | H |
| 241 | 10.194089913  | 2.183476858  | 3.782354034   | H |
| 242 | 8.646019832   | 2.388791494  | 3.293805255   | H |
| 243 | 2.074897712   | 5.736063363  | -1.158632552  | H |
| 244 | -0.384770694  | 5.497535355  | 0.320264627   | H |
| 245 | 2.309476812   | 7.792420845  | 0.587298252   | H |
| 246 | -3.074792937  | 3.716334386  | -1.833502883  | H |
| 247 | -4.502486579  | 4.597951618  | -3.153092535  | H |
| 248 | -5.930314501  | 3.915536031  | -4.728610264  | H |
| 249 | -4.140979905  | 5.798323520  | -2.170225325  | H |
| 250 | -4.968424004  | 1.713675123  | -4.476440683  | H |
| 251 | -6.755830464  | 1.852655694  | -4.466862005  | H |
| 252 | 1.140798957   | 11.556303774 | -1.720128787  | H |
| 253 | 0.087292898   | 12.979135396 | -1.624542708  | H |
| 254 | 0.273466786   | 10.194251781 | -3.255745312  | H |
| 255 | -1.452544003  | 9.851762099  | -3.393387968  | H |
| 256 | -2.343037178  | 9.441137608  | -6.257584058  | H |
| 257 | -1.729939085  | 5.024807948  | -5.909076489  | H |
| 258 | -6.434660705  | 9.270462058  | -1.062864982  | H |
| 259 | -2.504981416  | 8.829432677  | 1.952561776   | H |
| 260 | -3.668040733  | 8.150401270  | -3.245428496  | H |
| 261 | 1.815036519   | 5.218590439  | -3.671101216  | H |
| 262 | 3.151337655   | 6.907089204  | -2.786187966  | H |
| 263 | -0.696331237  | 4.880485124  | -3.435975472  | H |
| 264 | -8.191160898  | 0.559547504  | -2.168824213  | H |
| 265 | 4.796549706   | 9.621024047  | -3.628769068  | H |
| 266 | -5.868010742  | -0.440440592 | -3.533243116  | H |
| 267 | 1.534715936   | 6.262708173  | -5.062038303  | H |
| 268 | -2.761441615  | 7.288202201  | 0.057048826   | H |
| 269 | 4.329335416   | 9.918871574  | -1.940788840  | H |
| 270 | -1.746564737  | 7.927648054  | -6.856681175  | H |
| 271 | -3.905882659  | 9.340227805  | -4.483837590  | H |
| 272 | -5.240298929  | -3.111992749 | -3.806553358  | H |
| 273 | -6.030989520  | -2.819315560 | -1.233421609  | H |
| 274 | -6.098854204  | 10.918305914 | 0.760876492   | H |
| 275 | -4.927478768  | 1.816559573  | -2.004842055  | H |

|     |              |               |              |   |
|-----|--------------|---------------|--------------|---|
| 276 | 0.486521927  | 7.988923525   | -3.603742941 | H |
| 277 | -0.670709743 | 6.430141198   | -6.065000417 | H |
| 278 | 0.115297511  | 4.213314552   | -4.841633694 | H |
| 279 | -2.744103366 | 6.137528036   | -3.894647563 | H |
| 280 | 1.265289209  | 8.769061661   | 3.114918730  | H |
| 281 | 0.378501329  | 9.743497724   | 0.184285174  | H |
| 282 | 1.025743553  | 12.553685945  | 0.527518735  | H |
| 283 | 2.851182055  | 9.097210668   | 2.377508257  | H |
| 284 | -1.667264028 | 10.814065714  | 1.589728790  | H |
| 285 | 5.042194101  | -3.420634269  | -8.636151016 | H |
| 286 | 4.790425408  | -4.899248063  | -7.689259566 | H |
| 287 | 7.715216860  | -5.932883617  | -4.394617090 | H |
| 288 | 5.341689576  | -5.516180150  | -9.918688121 | H |
| 289 | 3.738409734  | -5.806513344  | -9.767581619 | H |
| 290 | 5.804693672  | 4.258434615   | -0.234644805 | H |
| 291 | 6.333743594  | 6.884666082   | 1.159762189  | H |
| 292 | 5.705093595  | 7.559928120   | -3.010398901 | H |
| 293 | 4.497041093  | 5.290610519   | 0.431016897  | H |
| 294 | 7.502572899  | 7.366585420   | 0.120021334  | H |
| 295 | 6.183927522  | 2.216751365   | -6.222588027 | H |
| 296 | 6.587146608  | 6.102288973   | -1.660416157 | H |
| 297 | 4.129923800  | -7.365382669  | 5.288373998  | H |
| 298 | 6.016210179  | -8.489873336  | 3.148989609  | H |
| 299 | 4.282771570  | 0.986630062   | -6.402734623 | H |
| 300 | 4.510993901  | -0.424879126  | 3.772701202  | H |
| 301 | 1.425052212  | 1.478606739   | -8.451214268 | H |
| 302 | -1.263162810 | -2.220042352  | -4.214143981 | H |
| 303 | 1.153090367  | 2.039487193   | -6.801465301 | H |
| 304 | 3.411454086  | -4.831125149  | 4.732417436  | H |
| 305 | 2.588383993  | -0.113335653  | -6.179927202 | H |
| 306 | 3.265740413  | -5.291952728  | 3.036047722  | H |
| 307 | 3.778503255  | -7.605007552  | 3.561565231  | H |
| 308 | 5.690304507  | -5.967930318  | 3.028584977  | H |
| 309 | 5.790131245  | -5.600019578  | 4.760978209  | H |
| 310 | -4.684301260 | -0.334138681  | -6.866440151 | H |
| 311 | 4.531608201  | -9.869115257  | 5.355456812  | H |
| 312 | 3.616749417  | -12.256783673 | 3.671512197  | H |
| 313 | 0.316464301  | -0.352482762  | -3.738478977 | H |
| 314 | 4.719057163  | -12.209238427 | 6.372719951  | H |
| 315 | 3.179110744  | -12.465364627 | 5.877160820  | H |
| 316 | 4.870279657  | -3.588121672  | 2.428408375  | H |
| 317 | -0.110232142 | 1.896909236   | -4.668144709 | H |
| 318 | -3.240754722 | -1.837424595  | -5.666498678 | H |
| 319 | 6.696243419  | -10.638818989 | -1.014069981 | H |
| 320 | 6.098273023  | -8.209919004  | -3.118840681 | H |
| 321 | 5.715212834  | -8.801672847  | 0.455213319  | H |
| 322 | 5.870735309  | -11.147638468 | -2.226949070 | H |
| 323 | 5.800769805  | 2.258458065   | -9.001868103 | H |
| 324 | 5.829053600  | -5.653334617  | 0.246454604  | H |
| 325 | 1.319605476  | -7.886390536  | 1.033226222  | H |
| 326 | 3.701579178  | -2.314188796  | -7.142217822 | H |
| 327 | 2.124363753  | -9.431125663  | -0.539241229 | H |
| 328 | 2.940448522  | -7.232616402  | -6.696649335 | H |
| 329 | 2.088819405  | -5.649691385  | -4.911408569 | H |
| 330 | 5.158946040  | -12.943499482 | 4.192328262  | H |
| 331 | 4.916719430  | -1.340607512  | 2.329179049  | H |
| 332 | 7.675575663  | -6.619940956  | 1.436003154  | H |
| 333 | 6.797507818  | -4.450809728  | 0.409729226  | H |
| 334 | 8.019072311  | -7.707557776  | 3.521023269  | H |
| 335 | 3.275664141  | -3.137704787  | 5.624285756  | H |
| 336 | 3.185104921  | -8.576188790  | -3.287537745 | H |
| 337 | 4.223545691  | -9.026709217  | -1.930311042 | H |
| 338 | 1.147728361  | -8.825210137  | -1.887798534 | H |
| 339 | 1.650668612  | -2.242868130  | -5.865280934 | H |
| 340 | -2.097809044 | 2.295612671   | -6.152589852 | H |
| 341 | -4.380131528 | 1.418767084   | -6.938518775 | H |
| 342 | 1.612195901  | -6.147359745  | 0.856512805  | H |
| 343 | 7.644972012  | -8.166109504  | 1.280868472  | H |
| 344 | 6.311132812  | -9.952766396  | 1.307672693  | H |
| 345 | 3.279238332  | -1.456453058  | 5.453767490  | H |
| 346 | 5.286504863  | -8.126312342  | -6.158197949 | H |
| 347 | 6.137525593  | -6.550759724  | -2.536721480 | H |
| 348 | 0.802117338  | -2.962154426  | -7.267122556 | H |
| 349 | 5.205310230  | 3.692285642   | -6.371241972 | H |
| 350 | 7.274642886  | -0.656099361  | 4.710950257  | H |
| 351 | 7.526686205  | -0.254216988  | 2.998866330  | H |
| 352 | 8.745719807  | -7.656770673  | -5.623229728 | H |
| 353 | 7.815458928  | -8.824074934  | -4.953684200 | H |
| 354 | 9.519984880  | -9.537734288  | -0.828544036 | H |
| 355 | 7.900212851  | -9.009382667  | -2.344351246 | H |
| 356 | 11.169819613 | -8.639795905  | -2.821157398 | H |
| 357 | 9.496284175  | -7.823517567  | -0.362844554 | H |

|     |              |               |               |    |
|-----|--------------|---------------|---------------|----|
| 358 | 10.155424046 | -0.795765530  | 3.225046836   | H  |
| 359 | -2.076565509 | 13.419297415  | 3.565781709   | H  |
| 360 | 8.963131859  | -7.849851907  | 6.378551437   | H  |
| 361 | 8.717262549  | -5.382418167  | 5.192085101   | H  |
| 362 | -3.696699461 | 12.719347729  | 1.116085504   | H  |
| 363 | -3.497285784 | 10.655380882  | 3.396605676   | H  |
| 364 | -4.967620265 | 11.505246789  | 2.881240933   | H  |
| 365 | -5.643268772 | 7.372124227   | -2.046443938  | H  |
| 366 | -1.558730748 | 0.021165780   | -0.790400207  | H  |
| 367 | 3.489113737  | -4.641895118  | -2.064462161  | Mo |
| 368 | -7.709526991 | -6.521985014  | -0.878388329  | N  |
| 369 | -9.333291348 | -3.816858276  | 1.134038604   | N  |
| 370 | -8.824330289 | -4.093114297  | 3.884894129   | N  |
| 371 | -6.220306098 | -5.161187550  | 4.009197232   | N  |
| 372 | -4.668146553 | -2.942899165  | 3.149014282   | N  |
| 373 | -5.193503314 | -1.148680190  | 5.324796791   | N  |
| 374 | -4.463652661 | -2.575442530  | 7.754170433   | N  |
| 375 | -2.077605701 | -4.063573699  | 7.207173414   | N  |
| 376 | -0.386569469 | -2.653359458  | 5.336799789   | N  |
| 377 | -0.282742438 | 0.186717809   | 6.133328677   | N  |
| 378 | -0.867194562 | 0.149440223   | 9.053163805   | N  |
| 379 | 4.008847670  | -11.895350376 | 5.708008693   | N  |
| 380 | 5.052367322  | -9.740432866  | 4.481730812   | N  |
| 381 | 4.470407926  | -3.623243638  | 3.368917034   | N  |
| 382 | 0.911956532  | 1.734933338   | -0.838275026  | N  |
| 383 | 0.225246499  | 2.582888678   | -0.540827931  | N  |
| 384 | 3.769452680  | -2.338188708  | 5.223695393   | N  |
| 385 | 4.484532666  | -1.310699348  | 3.274651035   | N  |
| 386 | 7.975585991  | -7.821957467  | 4.558231188   | N  |
| 387 | -5.891246879 | -2.441732164  | -3.353167417  | N  |
| 388 | -2.220941888 | -5.435828220  | -3.272836540  | N  |
| 389 | -5.900195911 | 0.075782195   | -2.637295376  | N  |
| 390 | -8.139068083 | 1.430313632   | -1.644869077  | N  |
| 391 | -7.906626881 | 1.073946585   | 1.137470873   | N  |
| 392 | -5.665985441 | 2.607731727   | 1.841071254   | N  |
| 393 | -2.850066424 | 2.854534318   | -1.281127053  | N  |
| 394 | -2.156723824 | 0.878188590   | -0.740804162  | N  |
| 395 | -6.136130341 | 5.290090045   | 2.398531358   | N  |
| 396 | -9.174038047 | 8.608236471   | 0.864898985   | N  |
| 397 | -9.032942102 | 10.352458013  | 2.228936287   | N  |
| 398 | 9.381783871  | 1.686453746   | 3.409783127   | N  |
| 399 | 6.889162426  | 6.580225980   | 0.353712253   | N  |
| 400 | 5.104333586  | 8.017407996   | -2.329180386  | N  |
| 401 | 2.451688683  | 7.623605992   | -3.019980419  | N  |
| 402 | -2.218536674 | 6.618056800   | -4.648121129  | N  |
| 403 | -2.133680250 | 8.462950087   | -6.087631807  | N  |
| 404 | -3.340877112 | 8.580019673   | -4.114313212  | N  |
| 405 | 1.183132793  | 6.193255786   | -0.882477090  | N  |
| 406 | 1.505447942  | 8.066213984   | 1.158538600   | N  |
| 407 | 0.505310175  | 10.582794068  | 0.749925956   | N  |
| 408 | -0.702402008 | 10.451812076  | -3.054173539  | N  |
| 409 | -1.854071143 | 11.814016311  | 1.578126696   | N  |
| 410 | 4.433306332  | -5.055879345  | -9.824202214  | N  |
| 411 | 2.858113334  | -2.784242569  | -7.490353071  | N  |
| 412 | 1.997420595  | 0.115969131   | -6.997738322  | N  |
| 413 | 4.263218379  | 1.870507487   | -6.925335943  | N  |
| 414 | -1.043771424 | -2.851084719  | -10.131592703 | N  |
| 415 | -2.596428375 | -0.877009729  | -8.752811798  | N  |
| 416 | 7.814355272  | -7.839683706  | -5.238225826  | N  |
| 417 | 3.983063631  | -6.027007175  | -3.946035633  | N  |
| 418 | 3.484792526  | -6.957661103  | -5.883681951  | N  |
| 419 | 8.646543373  | -8.315746240  | -2.253879026  | N  |
| 420 | -7.173686260 | -4.538825504  | 1.143046112   | O  |
| 421 | -7.724373007 | -2.096449529  | 3.873271874   | O  |
| 422 | -6.105178419 | -4.546244094  | 6.205209889   | O  |
| 423 | -3.007809614 | -3.735080063  | 4.487929575   | O  |
| 424 | -3.122636863 | -0.287935156  | 4.927553079   | O  |
| 425 | -3.688008475 | -0.551191683  | 8.478918364   | O  |
| 426 | -1.554028693 | -3.944148120  | 9.441206900   | O  |
| 427 | 1.389992743  | -3.765841922  | 6.274725804   | O  |
| 428 | 1.952960747  | -0.161141114  | 5.823837631   | O  |
| 429 | 1.062286344  | 1.339048302   | 9.145913321   | O  |
| 430 | 0.987694985  | -0.681468377  | 12.006771837  | O  |
| 431 | 5.850693737  | -10.975900483 | 2.695617209   | O  |
| 432 | 6.660986442  | -8.318360119  | 6.377531378   | O  |
| 433 | 10.701181126 | -5.702828887  | 5.540524813   | O  |
| 434 | -5.724273586 | -0.345326488  | -0.389877456  | O  |
| 435 | -3.844629013 | -4.172878267  | -4.248235574  | O  |
| 436 | -6.775050599 | 3.131589651   | -0.968629111  | O  |
| 437 | -5.733943246 | 3.564269313   | -3.841711024  | O  |
| 438 | -9.729843237 | 2.428754926   | 1.469642624   | O  |
| 439 | -5.853462174 | 1.979704463   | 4.029969568   | O  |

|                                                  |              |                          |               |                |
|--------------------------------------------------|--------------|--------------------------|---------------|----------------|
| 440                                              | -4.142000927 | 5.430214860              | 3.502705257   | O              |
| 441                                              | -6.430872939 | 7.784693564              | 4.891891888   | O              |
| 442                                              | 10.266003311 | -1.172527422             | 5.228915859   | O              |
| 443                                              | 3.486441064  | 4.198856787              | 4.309130054   | O              |
| 444                                              | 4.344171877  | 8.033230988              | -0.179009405  | O              |
| 445                                              | 2.120508767  | 9.870635848              | -3.377527274  | O              |
| 446                                              | -0.745410747 | 7.217578149              | -1.569883061  | O              |
| 447                                              | -0.407809611 | 7.272403965              | 2.145498678   | O              |
| 448                                              | 2.582701536  | 5.484893449              | 1.867751450   | O              |
| 449                                              | 1.682628961  | 11.437457136             | 2.524179172   | O              |
| 450                                              | -1.270995610 | 13.775940469             | 0.573149007   | O              |
| 451                                              | -2.154538399 | 11.312600187             | -1.512973582  | O              |
| 452                                              | -3.984560795 | 14.111969370             | 3.335075584   | O              |
| 453                                              | -4.732284020 | 7.304791754              | -1.700590494  | O              |
| 454                                              | 2.025363455  | -4.664641901             | -8.517679516  | O              |
| 455                                              | 0.436357755  | -0.732122596             | -8.447842634  | O              |
| 456                                              | 3.080828032  | 3.454213348              | -8.049512016  | O              |
| 457                                              | 6.853798503  | 3.900771082              | -8.400913030  | O              |
| 458                                              | -4.400503751 | -2.171111690             | -9.271432155  | O              |
| 459                                              | -1.581808512 | -6.484084342             | -6.108834636  | O              |
| 460                                              | 0.452935023  | -5.777321222             | -6.691042815  | O              |
| 461                                              | -2.947704643 | 2.666898608              | -8.642686264  | O              |
| 462                                              | 9.620034877  | -6.357682927             | -2.842923100  | O              |
| 463                                              | 12.013241316 | -8.118001565             | -1.038264071  | O              |
| 464                                              | -0.291042417 | -6.197421273             | -1.279877903  | O              |
| 465                                              | -1.098157817 | -7.106839785             | 0.625992453   | O              |
| 466                                              | 4.249388197  | -11.323528280            | -2.883989691  | O              |
| 467                                              | 2.008716958  | -11.127848817            | -3.116142203  | O              |
| 468                                              | 4.457740149  | -6.207336596             | -0.850119482  | O              |
| 469                                              | 4.167384665  | -7.933923871             | 0.556226693   | O              |
| 470                                              | 2.057486766  | -6.323233145             | -1.863369983  | O              |
| 471                                              | 8.139989901  | -7.437911565             | 1.746859195   | O              |
| 472                                              | 6.521871780  | -5.277700469             | 0.848317632   | O              |
| 473                                              | -3.746915482 | 5.105371962              | -2.753444661  | O              |
| 474                                              | 6.800619890  | -11.145988740            | -1.850500917  | O              |
| 475                                              | 6.532740331  | -9.361417561             | 0.543620183   | O              |
| 476                                              | 4.020220835  | 4.618801967              | -1.860384034  | S              |
| 477                                              | 2.468360840  | 1.664948544              | -3.256794313  | S              |
| 478                                              | 1.990537977  | -3.439020034             | -3.467139709  | S              |
| 479                                              | 3.526950857  | 1.395084045              | 0.294993301   | S              |
| 480                                              | 0.451306596  | -1.126449452             | -1.011394999  | S              |
| 481                                              | 4.507503887  | -1.061661057             | -5.105531052  | S              |
| 482                                              | 2.901142914  | -3.647514106             | 0.046081716   | S              |
| 483                                              | 5.997937046  | 1.278283019              | -2.300389181  | S              |
| 484                                              | 5.567434953  | -3.618232321             | -2.533012709  | S              |
| 485                                              | 6.029071172  | -1.508786494             | 0.426392729   | S              |
|                                                  | end          |                          |               |                |
| <b>resting<br/>2N2 dissociated<br/>35, S=3/2</b> |              | <b>bm522n2xdta.car_4</b> |               |                |
| <b>Fe( 139) -2.419</b>                           | 1            | -8.329836712             | -4.651428980  | 0.721411370 C  |
| <b>Fe( 140) -2.473</b>                           | 2            | -8.761212528             | -5.760320110  | -0.245709318 C |
| <b>Fe( 141) -2.490</b>                           | 3            | -9.036271481             | -2.630567595  | 1.926570411 C  |
| <b>Fe( 142) 2.803</b>                            | 4            | -8.472091146             | -2.918463091  | 3.314760536 C  |
| <b>Fe( 143) 2.978</b>                            | 5            | -8.284779209             | -4.493241709  | 5.174152410 C  |
| <b>Fe( 144) 2.186</b>                            | 6            | -6.772037701             | -4.730733605  | 5.172243544 C  |
| <b>Fe( 145) 2.258</b>                            | 7            | -4.778517010             | -5.282745940  | 3.874567993 C  |
|                                                  | 8            | -4.069706796             | -3.926939509  | 3.862090772 C  |
|                                                  | 9            | -4.133221914             | -1.594257479  | 3.147546059 C  |
|                                                  | 10           | -4.100119513             | -0.954177829  | 4.545067237 C  |
|                                                  | 11           | -5.264012728             | -0.539864121  | 6.636120876 C  |
|                                                  | 12           | -4.388906731             | -1.225433958  | 7.694737996 C  |
|                                                  | 13           | -3.789120905             | -3.327593425  | 8.799361954 C  |
|                                                  | 14           | -2.354570121             | -3.790860474  | 8.505131308 C  |
|                                                  | 15           | -0.796762568             | -4.602594996  | 6.775526427 C  |
|                                                  | 16           | 0.167740556              | -3.617269847  | 6.106007656 C  |
|                                                  | 17           | 0.430829064              | -1.651755091  | 4.629620760 C  |
|                                                  | 18           | 0.770661768              | -0.478851558  | 5.576926024 C  |
|                                                  | 19           | -0.209459461             | -1.194331469  | 3.301505057 C  |
|                                                  | 20           | 0.621430600              | -0.075724891  | 2.664379454 C  |
|                                                  | 21           | -0.368102693             | -2.389453566  | 2.355206652 C  |
|                                                  | 22           | -0.103294016             | 1.339706582   | 7.002477219 C  |
|                                                  | 23           | 0.087098197              | 0.931204268   | 8.479543236 C  |
|                                                  | 24           | -1.247698005             | 2.366248282   | 6.814999160 C  |
|                                                  | 25           | -1.128756082             | 3.517715667   | 7.820397376 C  |
|                                                  | 26           | -1.257468320             | 2.906217058   | 5.378916504 C  |
|                                                  | 27           | -0.795209906             | -0.166076066  | 10.459353271 C |
|                                                  | 28           | 0.541716602              | -0.754707835  | 10.859941100 C |
|                                                  | 29           | 4.478442022              | -12.086173430 | 4.333933513 C  |
|                                                  | 30           | 5.206681569              | -10.870848782 | 3.763116744 C  |
|                                                  | 31           | 5.644530617              | -8.446309308  | 4.177555320 C  |
|                                                  | 32           | 6.812262049              | -8.189369699  | 5.149314022 C  |
|                                                  | 33           | 4.575781112              | -7.343467487  | 4.276553570 C  |

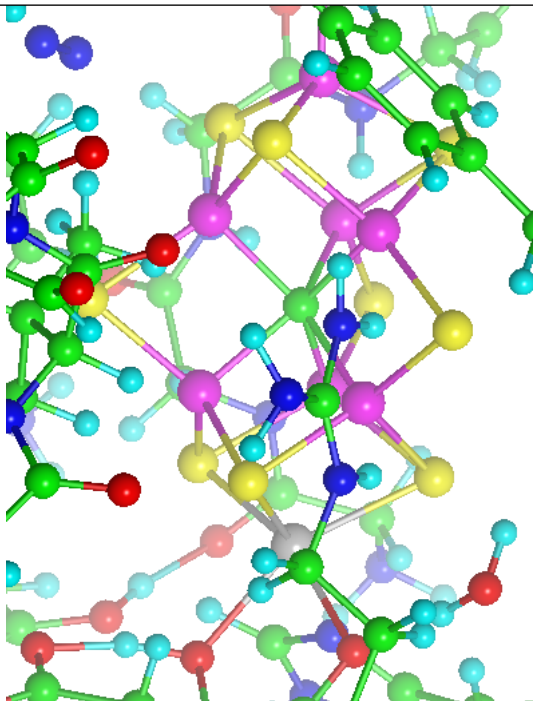

|     |              |              |              |   |
|-----|--------------|--------------|--------------|---|
| 34  | 5.116591566  | -5.946832945 | 3.961312294  | C |
| 35  | 3.983310691  | -4.933567447 | 3.798419335  | C |
| 36  | 4.243232221  | -2.437968949 | 3.958837535  | C |
| 37  | 9.173658170  | -7.561774115 | 5.334410057  | C |
| 38  | 9.561926418  | -6.098809070 | 5.348130126  | C |
| 39  | -5.458092339 | -2.212468840 | -1.968432880 | C |
| 40  | -5.712423145 | -0.745115560 | -1.576472466 | C |
| 41  | -3.959476160 | -2.520474179 | -1.763264728 | C |
| 42  | -3.575115294 | -4.014968810 | -1.824111738 | C |
| 43  | -3.214220270 | -4.543526342 | -3.211961547 | C |
| 44  | -5.861172996 | 1.520378851  | -2.533440104 | C |
| 45  | -6.974443960 | 2.105509506  | -1.653860089 | C |
| 46  | -5.844782527 | 2.126440651  | -3.943200520 | C |
| 47  | -9.253288528 | 1.832177446  | -0.796200158 | C |
| 48  | -8.976006904 | 1.808815278  | 0.711266636  | C |
| 49  | -7.498896336 | 1.079247356  | 2.525866099  | C |
| 50  | -6.273792380 | 1.925632503  | 2.866120363  | C |
| 51  | -4.523416436 | 3.454103629  | 2.104701084  | C |
| 52  | -4.907702786 | 4.806773303  | 2.758041410  | C |
| 53  | -3.761399221 | 3.798035371  | 0.817998535  | C |
| 54  | -3.174910731 | 2.660253673  | 0.047997786  | C |
| 55  | -2.704301033 | 1.413505791  | 0.387472755  | C |
| 56  | -2.281118419 | 1.719400360  | -1.770575297 | C |
| 57  | -6.575455087 | 6.626857403  | 2.750202937  | C |
| 58  | -6.627923530 | 6.751720666  | 4.271291376  | C |
| 59  | -7.983081932 | 6.823774659  | 2.140749549  | C |
| 60  | -8.470096038 | 8.236680665  | 2.009801812  | C |
| 61  | -8.378825124 | 9.313136959  | 2.870905089  | C |
| 62  | -9.486769254 | 9.883219128  | 1.037652018  | C |
| 63  | 8.942631321  | 0.669495497  | 4.358770511  | C |
| 64  | 9.871804076  | -0.525578596 | 4.263976878  | C |
| 65  | 7.519555741  | 0.162995832  | 4.008441857  | C |
| 66  | 6.467840202  | 1.242709589  | 4.113057245  | C |
| 67  | 5.806176289  | 1.495087535  | 5.328582220  | C |
| 68  | 6.111704368  | 2.017684016  | 2.995830246  | C |
| 69  | 4.812490411  | 2.474164421  | 5.427784227  | C |
| 70  | 5.131379428  | 3.007078669  | 3.082772066  | C |
| 71  | 4.477407319  | 3.227029189  | 4.297836973  | C |
| 72  | 5.966752960  | 6.313316597  | -0.773524944 | C |
| 73  | 5.063605893  | 7.526816540  | -1.056583058 | C |
| 74  | 5.109439329  | 5.093526906  | -0.455248459 | C |
| 75  | 4.324422368  | 9.170744603  | -2.745319400 | C |
| 76  | 2.854078239  | 8.906004119  | -3.080316271 | C |
| 77  | 1.074152977  | 7.162946526  | -3.164012503 | C |
| 78  | 0.433374027  | 6.850832493  | -1.784910973 | C |
| 79  | 1.098906617  | 5.928770350  | -4.100525630 | C |
| 80  | -0.196414169 | 5.154299731  | -4.372484407 | C |
| 81  | -1.206071604 | 5.800185234  | -5.333783394 | C |
| 82  | -2.577336157 | 7.851279250  | -4.963995395 | C |
| 83  | 0.676523237  | 5.915722290  | 0.465581141  | C |
| 84  | 0.531815026  | 7.171173436  | 1.330938075  | C |
| 85  | 1.546856016  | 4.912791925  | 1.262945121  | C |
| 86  | 1.784293901  | 9.078738041  | 2.193910671  | C |
| 87  | 1.332376736  | 10.484426555 | 1.843429631  | C |
| 88  | 0.213347158  | 11.881559739 | 0.196590222  | C |
| 89  | -1.048191008 | 12.562159450 | 0.783923393  | C |
| 90  | 0.184376162  | 11.917209087 | -1.333803018 | C |
| 91  | -1.000654663 | 11.189035928 | -1.957699871 | C |
| 92  | -3.166267032 | 12.269717083 | 1.979008365  | C |
| 93  | -3.050911881 | 13.355911511 | 3.040065016  | C |
| 94  | -4.013319753 | 11.084168700 | 2.520918317  | C |
| 95  | -4.254969010 | 10.026142834 | 1.468691520  | C |
| 96  | -5.364977840 | 10.109544555 | 0.613740051  | C |
| 97  | -3.350403650 | 8.967923832  | 1.276360606  | C |
| 98  | -5.553781543 | 9.185475752  | -0.417311528 | C |
| 99  | -3.505342470 | 8.053880294  | 0.230444514  | C |
| 100 | -4.606037619 | 8.180654020  | -0.613143991 | C |
| 101 | 4.409919922  | -4.325503820 | -8.570543935 | C |
| 102 | 2.989999896  | -3.928957344 | -8.202093629 | C |
| 103 | 1.604259248  | -2.282645642 | -6.963824344 | C |
| 104 | 1.286456962  | -0.895665760 | -7.532086499 | C |
| 105 | 1.867929695  | 1.488836432  | -7.435280489 | C |
| 106 | 3.135314858  | 2.334954083  | -7.499159849 | C |
| 107 | 5.443196906  | 2.721591576  | -6.857058724 | C |
| 108 | 6.059783817  | 2.998302564  | -8.213262866 | C |
| 109 | -2.226355467 | -3.241396788 | -9.368444493 | C |
| 110 | -3.165123828 | -2.050694455 | -9.143972902 | C |
| 111 | -1.974842420 | -3.965371970 | -8.024527360 | C |
| 112 | -1.376607513 | -5.367120110 | -8.244806933 | C |
| 113 | -0.862666227 | -5.935479235 | -6.939825302 | C |
| 114 | -3.411390496 | 0.291958457  | -8.498230994 | C |
| 115 | -2.759217214 | 1.534439200  | -9.069595584 | C |

|     |               |               |              |    |
|-----|---------------|---------------|--------------|----|
| 116 | -3.905848622  | 0.428394675   | -7.038614004 | C  |
| 117 | -2.799187668  | 0.251159276   | -6.032060092 | C  |
| 118 | -1.920623548  | 1.304338763   | -5.722789743 | C  |
| 119 | -2.564921614  | -1.011674581  | -5.463891109 | C  |
| 120 | -0.811902324  | 1.081140553   | -4.899300746 | C  |
| 121 | -1.458193333  | -1.233325681  | -4.638224772 | C  |
| 122 | -0.568057528  | -0.190155816  | -4.367555343 | C  |
| 123 | 7.605222265   | -6.987795236  | -4.059700594 | C  |
| 124 | 8.695088144   | -7.186628394  | -2.996435057 | C  |
| 125 | 6.209983408   | -7.165889846  | -3.441495959 | C  |
| 126 | 5.044594417   | -6.852867279  | -4.326024555 | C  |
| 127 | 4.737399862   | -7.429000909  | -5.542161004 | C  |
| 128 | 3.057220696   | -6.140218722  | -4.895229324 | C  |
| 129 | 9.643799223   | -8.522166605  | -1.211235644 | C  |
| 130 | 11.054756938  | -8.395024694  | -1.740653804 | C  |
| 131 | -0.161274543  | -6.796989380  | -0.122142330 | C  |
| 132 | 1.291867211   | -7.065562657  | 0.325757090  | C  |
| 133 | 2.296477844   | -7.333154099  | -0.823316868 | C  |
| 134 | 2.130193966   | -8.764460254  | -1.392525672 | C  |
| 135 | 3.228356621   | -9.203589786  | -2.368358148 | C  |
| 136 | 3.143714591   | -10.680630652 | -2.813506210 | C  |
| 137 | 3.736238164   | -7.176128013  | -0.310277858 | C  |
| 138 | 3.628492319   | -1.065014578  | -1.817012958 | C  |
| 139 | 3.958237426   | -2.342822622  | -3.375999118 | Fe |
| 140 | 2.288022890   | 0.295117833   | -1.448507344 | Fe |
| 141 | 4.843143339   | 0.067373340   | -0.734683459 | Fe |
| 142 | 4.179334494   | 0.202354712   | -3.276801989 | Fe |
| 143 | 3.939215213   | 2.372181724   | -1.666666661 | Fe |
| 144 | 4.608121971   | -2.521843084  | -0.872645641 | Fe |
| 145 | 2.123792745   | -2.349565961  | -1.525270740 | Fe |
| 146 | -7.075682985  | -6.909666695  | -0.161983811 | H  |
| 147 | -7.111267293  | -5.900781439  | -1.444058487 | H  |
| 148 | -10.238979839 | -3.880599373  | 0.684325889  | H  |
| 149 | -9.404635634  | -5.314285318  | -1.021603394 | H  |
| 150 | -9.406309571  | -6.450368698  | 0.324364249  | H  |
| 151 | -8.300460190  | -1.989940417  | 1.418696594  | H  |
| 152 | -9.430453535  | -4.726931702  | 3.368083800  | H  |
| 153 | -9.964932623  | -2.056159473  | 2.043901036  | H  |
| 154 | -8.784717215  | -5.419348125  | 5.488241779  | H  |
| 155 | -6.789372115  | -5.192234454  | 3.160577386  | H  |
| 156 | -8.481988691  | -3.722912210  | 5.931685184  | H  |
| 157 | -3.102746502  | -1.592752062  | 2.772692450  | H  |
| 158 | -5.518174802  | -3.150009532  | 2.625023976  | H  |
| 159 | -4.558717414  | -5.816535318  | 2.940274090  | H  |
| 160 | -4.940535144  | 0.507507644   | 6.583489371  | H  |
| 161 | -6.022325106  | -1.602277792  | 4.924503446  | H  |
| 162 | -4.364892759  | -5.860722414  | 4.709618706  | H  |
| 163 | -4.748240807  | -0.986161744  | 2.470085063  | H  |
| 164 | -5.100355091  | -3.084417832  | 7.126154157  | H  |
| 165 | -6.310625277  | -0.563738857  | 6.969498583  | H  |
| 166 | -0.957055590  | -3.200276419  | 2.807966295  | H  |
| 167 | -0.858797692  | -2.077160835  | 1.421564918  | H  |
| 168 | 0.612680975   | -2.794501394  | 2.062516402  | H  |
| 169 | -1.207109192  | -0.787609490  | 3.543764369  | H  |
| 170 | -4.384853865  | -4.224040919  | 9.025224980  | H  |
| 171 | -1.383651827  | 2.103260146   | 4.639086929  | H  |
| 172 | -1.725838140  | -0.106754583  | 8.546725818  | H  |
| 173 | -1.176328636  | 3.172819160   | 8.863378015  | H  |
| 174 | 0.184933634   | 0.224466137   | 1.702646010  | H  |
| 175 | 1.647619052   | -0.406484630  | 2.447946629  | H  |
| 176 | 8.936461432   | 1.003437817   | 5.414033110  | H  |
| 177 | -2.083634132  | 3.620919299   | 5.246180802  | H  |
| 178 | -1.948779524  | 4.234088541   | 7.662770981  | H  |
| 179 | -0.314282078  | 3.433675782   | 5.160149163  | H  |
| 180 | -0.176536115  | 4.055075460   | 7.683922445  | H  |
| 181 | -2.204061198  | 1.842801739   | 6.996264533  | H  |
| 182 | 0.851107346   | 1.810198991   | 6.725110592  | H  |
| 183 | -1.232242755  | -0.076187655  | 5.841143953  | H  |
| 184 | 0.676426700   | 0.813704296   | 3.310004974  | H  |
| 185 | 1.950307113   | 4.149039526   | 0.581166861  | H  |
| 186 | 0.880653150   | 4.418877636   | 1.987946068  | H  |
| 187 | 2.851965452   | 5.032623924   | 2.721913273  | H  |
| 188 | 3.097912647   | 4.247573532   | 5.210024046  | H  |
| 189 | 4.847606729   | 3.582414730   | 2.201796908  | H  |
| 190 | 6.580628756   | 1.823870558   | 2.028314604  | H  |
| 191 | 6.053983464   | 0.900858087   | 6.212104306  | H  |
| 192 | -1.386699547  | -2.694057806  | 5.129511907  | H  |
| 193 | -0.970885862  | -5.430738932  | 6.071133414  | H  |
| 194 | -0.278599343  | -5.000798105  | 7.654772017  | H  |
| 195 | -2.793938086  | -3.939424123  | 6.488810961  | H  |
| 196 | -3.740719885  | -2.713347906  | 9.706742306  | H  |
| 197 | 4.290039508   | 2.635999812   | 6.374115351  | H  |

|     |               |              |               |   |
|-----|---------------|--------------|---------------|---|
| 198 | 1.394470176   | -2.123786248 | 4.399737687   | H |
| 199 | -1.003404910  | 0.714147704  | 11.089808395  | H |
| 200 | -1.560619878  | -0.928595957 | 10.671468150  | H |
| 201 | 1.067242843   | -1.320973350 | 10.057474750  | H |
| 202 | 10.024515054  | -8.163439881 | 4.979104861   | H |
| 203 | -1.964166215  | -5.833426983 | -4.171421424  | H |
| 204 | 0.995848085   | -6.144773757 | -1.741428147  | H |
| 205 | -2.155211200  | -6.039490522 | -8.631001113  | H |
| 206 | -0.560299611  | -5.321394538 | -8.979861389  | H |
| 207 | -2.916927144  | -4.064298019 | -7.463292036  | H |
| 208 | -2.118484803  | 1.346498736  | -9.962902383  | H |
| 209 | -2.815872642  | -3.920662197 | -10.003321749 | H |
| 210 | -3.378273716  | -1.954378390 | -2.509427864  | H |
| 211 | -4.413897398  | -4.631531055 | -1.456198299  | H |
| 212 | -1.578361674  | -0.825060258 | -8.590769385  | H |
| 213 | -4.312059467  | 0.150926680  | -9.130541761  | H |
| 214 | -0.367705053  | -2.334133714 | -9.552608391  | H |
| 215 | -1.647141479  | -5.704028112 | -2.434700090  | H |
| 216 | -1.304753930  | -3.346823338 | -7.406579042  | H |
| 217 | -0.551485396  | -3.690620339 | -10.463514890 | H |
| 218 | -6.822319418  | -2.839251537 | -3.387233735  | H |
| 219 | -3.675523248  | -2.134126436 | -0.773199174  | H |
| 220 | 0.932336173   | -5.315489213 | -7.451235127  | H |
| 221 | -2.739113024  | -4.202505686 | -1.134712696  | H |
| 222 | -3.870721900  | 2.950561317  | 2.832005864   | H |
| 223 | -2.683663482  | 0.902960004  | 1.344580374   | H |
| 224 | -8.333843978  | 1.470808368  | 3.123238820   | H |
| 225 | -7.309295975  | 0.588861192  | 0.458051608   | H |
| 226 | -6.737398374  | 4.694579888  | 1.837930409   | H |
| 227 | -7.906961094  | 9.441036942  | 3.838826515   | H |
| 228 | -6.925099781  | 5.808267567  | 4.789698730   | H |
| 229 | -8.706555972  | 6.210313865  | 2.707242488   | H |
| 230 | -5.878690843  | 7.383957157  | 2.357834709   | H |
| 231 | -10.036464704 | 10.505860704 | 0.335821296   | H |
| 232 | -2.946949284  | 4.483555604  | 1.102998580   | H |
| 233 | -4.433222974  | 4.358752912  | 0.152095311   | H |
| 234 | -9.136487311  | 11.295066296 | 2.594064873   | H |
| 235 | -7.962394847  | 6.405681627  | 1.122296602   | H |
| 236 | -6.065057388  | 2.565520496  | 0.895291484   | H |
| 237 | -7.309207914  | 0.055045832  | 2.879208296   | H |
| 238 | -9.567555576  | 2.857893156  | -1.033266405  | H |
| 239 | -1.901095341  | 1.562886528  | -2.777534979  | H |
| 240 | -10.101592814 | 1.165296806  | -0.997986112  | H |
| 241 | 10.194383231  | 2.187715062  | 3.782657261   | H |
| 242 | 8.649285321   | 2.387517662  | 3.284038392   | H |
| 243 | 2.102685696   | 5.756254681  | -1.151193182  | H |
| 244 | -0.334853506  | 5.498886911  | 0.363434167   | H |
| 245 | 2.332204062   | 7.817944241  | 0.597823997   | H |
| 246 | -3.134366594  | 3.674369527  | -1.852051937  | H |
| 247 | -4.505925373  | 4.596491104  | -3.161782852  | H |
| 248 | -5.926970628  | 3.913892583  | -4.739459504  | H |
| 249 | -4.134179429  | 5.782365236  | -2.169093731  | H |
| 250 | -4.983869710  | 1.707226628  | -4.489246920  | H |
| 251 | -6.768429860  | 1.854587485  | -4.476719470  | H |
| 252 | 1.142368953   | 11.553092196 | -1.731192308  | H |
| 253 | 0.089053437   | 12.975180617 | -1.625018861  | H |
| 254 | 0.271430531   | 10.192544724 | -3.263653442  | H |
| 255 | -1.456305676  | 9.856132816  | -3.404499912  | H |
| 256 | -2.351892116  | 9.429848495  | -6.254373272  | H |
| 257 | -1.726315995  | 5.019112371  | -5.909201182  | H |
| 258 | -6.430131993  | 9.255331847  | -1.067666956  | H |
| 259 | -2.503024718  | 8.826257095  | 1.952681343   | H |
| 260 | -3.667092817  | 8.143893010  | -3.239509034  | H |
| 261 | 1.817877439   | 5.212506792  | -3.673260557  | H |
| 262 | 3.155761682   | 6.907513290  | -2.784808147  | H |
| 263 | -0.697825898  | 4.874788085  | -3.432737475  | H |
| 264 | -8.203081034  | 0.560396264  | -2.171964068  | H |
| 265 | 4.793936974   | 9.625129558  | -3.627490374  | H |
| 266 | -5.871745273  | -0.444075384 | -3.540162456  | H |
| 267 | 1.531154857   | 6.259157015  | -5.059647515  | H |
| 268 | -2.753752847  | 7.282826179  | 0.058182128   | H |
| 269 | 4.323918938   | 9.919240398  | -1.940218020  | H |
| 270 | -1.770716607  | 7.916481163  | -6.859159950  | H |
| 271 | -3.901286381  | 9.335231159  | -4.477480778  | H |
| 272 | -5.226546100  | -3.116283362 | -3.804436494  | H |
| 273 | -6.024394677  | -2.818288433 | -1.235238308  | H |
| 274 | -6.099434857  | 10.906588087 | 0.754181980   | H |
| 275 | -4.938179776  | 1.814967206  | -2.018156327  | H |
| 276 | 0.486771988   | 7.979422257  | -3.594556925  | H |
| 277 | -0.670063366  | 6.426636955  | -6.058591913  | H |
| 278 | 0.114570702   | 4.207014451  | -4.837103567  | H |
| 279 | -2.747542279  | 6.125356612  | -3.891732364  | H |



|     |              |               |              |   |
|-----|--------------|---------------|--------------|---|
| 280 | 1.273211918  | 8.783699987   | 3.122945518  | H |
| 281 | 0.397600475  | 9.735012489   | 0.188821053  | H |
| 282 | 1.029183209  | 12.547713883  | 0.519029312  | H |
| 283 | 2.863369878  | 9.119282632   | 2.396438922  | H |
| 284 | -1.663487250 | 10.799740001  | 1.582689582  | H |
| 285 | 5.041010492  | -3.428154011  | -8.649882478 | H |
| 286 | 4.790317722  | -4.907388689  | -7.704988078 | H |
| 287 | 7.718939102  | -5.947188406  | -4.398704748 | H |
| 288 | 5.334263731  | -5.519457344  | -9.937219814 | H |
| 289 | 3.730814757  | -5.809896725  | -9.782876537 | H |
| 290 | 5.784582071  | 4.251974886   | -0.251000748 | H |
| 291 | 6.324402132  | 6.880140647   | 1.155658315  | H |
| 292 | 5.700585962  | 7.561080866   | -3.011863092 | H |
| 293 | 4.489805955  | 5.293616516   | 0.431100631  | H |
| 294 | 7.499274179  | 7.354539847   | 0.119743820  | H |
| 295 | 6.199742992  | 2.206731782   | -6.243403615 | H |
| 296 | 6.578277707  | 6.096882544   | -1.663647824 | H |
| 297 | 4.133648003  | -7.363567495  | 5.287139821  | H |
| 298 | 6.017608609  | -8.493148171  | 3.147610659  | H |
| 299 | 4.296232213  | 0.977296301   | -6.415676930 | H |
| 300 | 4.504779642  | -0.424817382  | 3.776788117  | H |
| 301 | 1.424073523  | 1.477423062   | -8.438720281 | H |
| 302 | -1.281205779 | -2.222677106  | -4.208960074 | H |
| 303 | 1.163019947  | 2.035410180   | -6.786078712 | H |
| 304 | 3.418123804  | -4.829941594  | 4.732612721  | H |
| 305 | 2.593178264  | -0.114966845  | -6.172287222 | H |
| 306 | 3.271489973  | -5.285850460  | 3.033831089  | H |
| 307 | 3.780384464  | -7.604154069  | 3.559647818  | H |
| 308 | 5.692404245  | -5.968823130  | 3.024197600  | H |
| 309 | 5.796378624  | -5.601300018  | 4.756582459  | H |
| 310 | -4.683584897 | -0.332061858  | -6.880858112 | H |
| 311 | 4.532386798  | -9.868840659  | 5.356129203  | H |
| 312 | 3.614842965  | -12.257465624 | 3.674021006  | H |
| 313 | 0.298160928  | -0.357428322  | -3.727089076 | H |
| 314 | 4.713732779  | -12.211380346 | 6.376239405  | H |
| 315 | 3.173241636  | -12.462824932 | 5.879066752  | H |
| 316 | 4.864391320  | -3.585226093  | 2.423945212  | H |
| 317 | -0.115519960 | 1.890142123   | -4.664327680 | H |
| 318 | -3.248856902 | -1.837253937  | -5.674005867 | H |
| 319 | 6.693443589  | -10.650208912 | -1.008563044 | H |
| 320 | 6.097186712  | -8.211211895  | -3.105297378 | H |
| 321 | 5.713258140  | -8.812521401  | 0.462305295  | H |
| 322 | 5.867739757  | -11.162578965 | -2.219953195 | H |
| 323 | 5.777830718  | 2.281973426   | -9.022298162 | H |
| 324 | 5.828540416  | -5.672347992  | 0.246817412  | H |
| 325 | 1.303138467  | -7.898125139  | 1.039526792  | H |
| 326 | 3.710359590  | -2.323248659  | -7.144932074 | H |
| 327 | 2.123314752  | -9.448784617  | -0.529493243 | H |
| 328 | 2.943819880  | -7.239283952  | -6.695417386 | H |
| 329 | 2.085934712  | -5.661300709  | -4.907590742 | H |
| 330 | 5.155347121  | -12.946299600 | 4.196685514  | H |
| 331 | 4.915482533  | -1.331456263  | 2.331210897  | H |
| 332 | 7.680830664  | -6.627305093  | 1.433418679  | H |
| 333 | 6.781513339  | -4.457183113  | 0.413366028  | H |
| 334 | 8.022750334  | -7.712851666  | 3.521241440  | H |
| 335 | 3.283969250  | -3.137847908  | 5.626602460  | H |
| 336 | 3.177540435  | -8.582949410  | -3.276226783 | H |
| 337 | 4.219347497  | -9.038365545  | -1.922488499 | H |
| 338 | 1.142573511  | -8.841263459  | -1.873506455 | H |
| 339 | 1.653127566  | -2.254193815  | -5.864361491 | H |
| 340 | -2.092108882 | 2.289935910   | -6.162951374 | H |
| 341 | -4.376536244 | 1.420111581   | -6.949322669 | H |
| 342 | 1.610525836  | -6.156848267  | 0.863873887  | H |
| 343 | 7.646100417  | -8.173737946  | 1.282813456  | H |
| 344 | 6.313156360  | -9.961663984  | 1.313368045  | H |
| 345 | 3.286404075  | -1.457092465  | 5.455834294  | H |
| 346 | 5.291721270  | -8.128846498  | -6.155869634 | H |
| 347 | 6.143018077  | -6.548539318  | -2.537589917 | H |
| 348 | 0.809133123  | -2.964940558  | -7.271496172 | H |
| 349 | 5.218991457  | 3.682602565   | -6.368497137 | H |
| 350 | 7.280321311  | -0.659690801  | 4.699666988  | H |
| 351 | 7.530835569  | -0.252318626  | 2.988156795  | H |
| 352 | 8.744351705  | -7.679711540  | -5.619651373 | H |
| 353 | 7.807906389  | -8.840214879  | -4.948011555 | H |
| 354 | 9.528310936  | -9.548665513  | -0.829480072 | H |
| 355 | 7.903346465  | -9.018626938  | -2.339478681 | H |
| 356 | 11.177395375 | -8.649264565  | -2.821061162 | H |
| 357 | 9.503593428  | -7.834963448  | -0.361820689 | H |
| 358 | 10.162662405 | -0.795130829  | 3.219393297  | H |
| 359 | -2.066020004 | 13.408047610  | 3.560736277  | H |
| 360 | 8.964908203  | -7.850344230  | 6.379980588  | H |
| 361 | 8.719244051  | -5.384819059  | 5.181354866  | H |

|     |              |               |               |    |
|-----|--------------|---------------|---------------|----|
| 362 | -3.685782229 | 12.711488590  | 1.111989261   | H  |
| 363 | -3.505349989 | 10.648136015  | 3.394851342   | H  |
| 364 | -4.966953194 | 11.505347744  | 2.869848967   | H  |
| 365 | -5.633697943 | 7.356046792   | -2.047079223  | H  |
| 366 | -1.527302280 | 0.021724645   | -0.803954990  | H  |
| 367 | 3.493424069  | -4.657549980  | -2.042093055  | Mo |
| 368 | -7.695478486 | -6.518251969  | -0.875655674  | N  |
| 369 | -9.328572669 | -3.815193480  | 1.133681233   | N  |
| 370 | -8.825757914 | -4.093702340  | 3.885772308   | N  |
| 371 | -6.222616395 | -5.163333652  | 4.010145058   | N  |
| 372 | -4.666720688 | -2.947423429  | 3.144500987   | N  |
| 373 | -5.193259637 | -1.152818768  | 5.319429340   | N  |
| 374 | -4.464412389 | -2.580182975  | 7.750499733   | N  |
| 375 | -2.074062878 | -4.060659106  | 7.202497122   | N  |
| 376 | -0.384415324 | -2.656726163  | 5.321529245   | N  |
| 377 | -0.283086612 | 0.184063917   | 6.120291158   | N  |
| 378 | -0.863616304 | 0.139424500   | 9.039105550   | N  |
| 379 | 4.004977406  | -11.895026122 | 5.710938698   | N  |
| 380 | 5.052547157  | -9.742117453  | 4.481872326   | N  |
| 381 | 4.478624789  | -3.621441496  | 3.370239189   | N  |
| 382 | 0.314964334  | 2.726050506   | -0.874183587  | N  |
| 383 | -0.140880710 | 2.904642899   | 0.123612565   | N  |
| 384 | 3.777923566  | -2.338233869  | 5.226259399   | N  |
| 385 | 4.481680218  | -1.308465408  | 3.275840017   | N  |
| 386 | 7.978223227  | -7.826480365  | 4.558244394   | N  |
| 387 | -5.879903801 | -2.445576234  | -3.355388621  | N  |
| 388 | -2.214156835 | -5.438860419  | -3.259154783  | N  |
| 389 | -5.907898011 | 0.073208639   | -2.645128134  | N  |
| 390 | -8.146924075 | 1.430774823   | -1.647446415  | N  |
| 391 | -7.910084008 | 1.073863838   | 1.134837159   | N  |
| 392 | -5.674368795 | 2.603089753   | 1.840524939   | N  |
| 393 | -2.905650507 | 2.812341227   | -1.302791207  | N  |
| 394 | -2.170878003 | 0.852086806   | -0.756861311  | N  |
| 395 | -6.125086869 | 5.286837273   | 2.393519480   | N  |
| 396 | -9.166534749 | 8.605921432   | 0.869294544   | N  |
| 397 | -9.028067620 | 10.350488285  | 2.233592480   | N  |
| 398 | 9.386658799  | 1.687672662   | 3.404151262   | N  |
| 399 | 6.880999153  | 6.571515046   | 0.352057855   | N  |
| 400 | 5.102770474  | 8.020393942   | -2.329610420  | N  |
| 401 | 2.454037122  | 7.620941135   | -3.022349822  | N  |
| 402 | -2.221176240 | 6.607907041   | -4.645443858  | N  |
| 403 | -2.120982734 | 8.457901078   | -6.076715782  | N  |
| 404 | -3.340167834 | 8.571367490   | -4.109714805  | N  |
| 405 | 1.206584371  | 6.203229760   | -0.868745536  | N  |
| 406 | 1.526071121  | 8.089206904   | 1.167275340   | N  |
| 407 | 0.517943529  | 10.579217846  | 0.748180030   | N  |
| 408 | -0.704001890 | 10.451004511  | -3.060818180  | N  |
| 409 | -1.847274568 | 11.800122785  | 1.573820249   | N  |
| 410 | 4.425952944  | -5.059561672  | -9.839390246  | N  |
| 411 | 2.864738545  | -2.790658678  | -7.489347622  | N  |
| 412 | 2.006119987  | 0.112309243   | -6.991889625  | N  |
| 413 | 4.271065709  | 1.866261487   | -6.928602613  | N  |
| 414 | -1.036443663 | -2.852299539  | -10.135923597 | N  |
| 415 | -2.588298606 | -0.875834155  | -8.759882763  | N  |
| 416 | 7.811831002  | -7.856604926  | -5.234660043  | N  |
| 417 | 3.980180908  | -6.037972446  | -3.939356937  | N  |
| 418 | 3.485443862  | -6.965691329  | -5.880021134  | N  |
| 419 | 8.650353984  | -8.325311363  | -2.251250312  | N  |
| 420 | -7.166983969 | -4.530058250  | 1.145219296   | O  |
| 421 | -7.729430202 | -2.095136567  | 3.878771050   | O  |
| 422 | -6.107937089 | -4.550869668  | 6.207135722   | O  |
| 423 | -3.009071867 | -3.740114805  | 4.485438853   | O  |
| 424 | -3.121067454 | -0.292933748  | 4.924120768   | O  |
| 425 | -3.690343871 | -0.555039307  | 8.474992420   | O  |
| 426 | -1.554870258 | -3.950394359  | 9.438020594   | O  |
| 427 | 1.392041851  | -3.752265146  | 6.277383650   | O  |
| 428 | 1.952951058  | -0.162200218  | 5.810757915   | O  |
| 429 | 1.064700066  | 1.331107921   | 9.134130589   | O  |
| 430 | 0.986493853  | -0.687899347  | 11.996265023  | O  |
| 431 | 5.851882432  | -10.982173355 | 2.699617180   | O  |
| 432 | 6.660338469  | -8.316314829  | 6.376825577   | O  |
| 433 | 10.701216434 | -5.704131121  | 5.543417769   | O  |
| 434 | -5.719220524 | -0.340761681  | -0.396797372  | O  |
| 435 | -3.836596504 | -4.177986917  | -4.239123777  | O  |
| 436 | -6.777559503 | 3.130093887   | -0.976699341  | O  |
| 437 | -5.739847558 | 3.562260968   | -3.850689744  | O  |
| 438 | -9.728978993 | 2.433555150   | 1.470788492   | O  |
| 439 | -5.860510222 | 1.977252132   | 4.029969691   | O  |
| 440 | -4.118605226 | 5.424900025   | 3.478852823   | O  |
| 441 | -6.414116038 | 7.781636331   | 4.886809488   | O  |
| 442 | 10.270628408 | -1.170456656  | 5.223779927   | O  |
| 443 | 3.486975413  | 4.191350800   | 4.318572334   | O  |

|     |              |               |              |   |
|-----|--------------|---------------|--------------|---|
| 444 | 4.343324417  | 8.035382806   | -0.179454138 | O |
| 445 | 2.116255326  | 9.867099124   | -3.381626227 | O |
| 446 | -0.736318655 | 7.200556612   | -1.556953019 | O |
| 447 | -0.387105629 | 7.290255522   | 2.151026347  | O |
| 448 | 2.614982001  | 5.578342582   | 1.943208259  | O |
| 449 | 1.674320875  | 11.458172171  | 2.525075232  | O |
| 450 | -1.266241709 | 13.764329123  | 0.573976056  | O |
| 451 | -2.154211629 | 11.316954116  | -1.520397712 | O |
| 452 | -3.974319127 | 14.099026257  | 3.334928910  | O |
| 453 | -4.721866762 | 7.292653941   | -1.702346932 | O |
| 454 | 2.021523428  | -4.660227263  | -8.526372888 | O |
| 455 | 0.446878495  | -0.733843570  | -8.444018168 | O |
| 456 | 3.083898998  | 3.452015356   | -8.043542150 | O |
| 457 | 6.842773806  | 3.913680179   | -8.413240670 | O |
| 458 | -4.393932673 | -2.164324847  | -9.284790783 | O |
| 459 | -1.581039788 | -6.476259797  | -6.105693935 | O |
| 460 | 0.453613774  | -5.774646242  | -6.693636538 | O |
| 461 | -2.935891639 | 2.668984808   | -8.646905011 | O |
| 462 | 9.622985961  | -6.367639615  | -2.846645876 | O |
| 463 | 12.017833447 | -8.118616228  | -1.038707467 | O |
| 464 | -0.292414019 | -6.194932780  | -1.274816075 | O |
| 465 | -1.105114675 | -7.101348218  | 0.629458687  | O |
| 466 | 4.244069120  | -11.334939214 | -2.880638542 | O |
| 467 | 2.004460704  | -11.136460322 | -3.115188536 | O |
| 468 | 4.460900584  | -6.239474983  | -0.850199534 | O |
| 469 | 4.162736074  | -7.952518572  | 0.569089932  | O |
| 470 | 2.064837203  | -6.338275784  | -1.853927935 | O |
| 471 | 8.144699696  | -7.445259367  | 1.744510489  | O |
| 472 | 6.515870597  | -5.288484626  | 0.850991572  | O |
| 473 | -3.746015996 | 5.088200361   | -2.753536766 | O |
| 474 | 6.797653860  | -11.159175667 | -1.843981071 | O |
| 475 | 6.532292476  | -9.369484015  | 0.548538242  | O |
| 476 | 4.004762086  | 4.658299937   | -1.874308485 | S |
| 477 | 2.419617849  | 1.649996544   | -3.237655175 | S |
| 478 | 1.997973532  | -3.439427769  | -3.464122957 | S |
| 479 | 3.314748810  | 1.430472931   | 0.251603457  | S |
| 480 | 0.486868760  | -0.950804623  | -1.007082275 | S |
| 481 | 4.555130960  | -1.051769360  | -5.087353722 | S |
| 482 | 2.932474041  | -3.677387221  | 0.081587404  | S |
| 483 | 5.902082203  | 1.311819994   | -2.247096578 | S |
| 484 | 5.580551273  | -3.648596072  | -2.534513779 | S |
| 485 | 6.014405786  | -1.422215479  | 0.424782190  | S |
| end |              |               |              |   |

|                                                       |  |                               |              |               |              |   |
|-------------------------------------------------------|--|-------------------------------|--------------|---------------|--------------|---|
| <b>resting<br/>2N2 transition state<br/>35, S=3/2</b> |  | <b>bm522n2xdta 2 53008.75</b> |              |               |              |   |
|                                                       |  | 1                             | -8.345050006 | -4.659285578  | 0.711383181  | C |
| <b>Fe(139) -2.365</b>                                 |  | 2                             | -8.789899697 | -5.761687791  | -0.256308908 | C |
|                                                       |  | 3                             | -9.027801633 | -2.631863751  | 1.916947255  | C |
| <b>Fe(140) -2.589</b>                                 |  | 4                             | -8.459391277 | -2.920169058  | 3.303387082  | C |
|                                                       |  | 5                             | -8.277337153 | -4.488714799  | 5.169279229  | C |
| <b>Fe(141) -2.555</b>                                 |  | 6                             | -6.763860152 | -4.721112909  | 5.167102906  | C |
|                                                       |  | 7                             | -4.768559374 | -5.270778385  | 3.872744015  | C |
| <b>Fe(142) 2.831</b>                                  |  | 8                             | -4.064322290 | -3.912229852  | 3.865287940  | C |
|                                                       |  | 9                             | -4.154531613 | -1.574627069  | 3.155458129  | C |
| <b>Fe(143) 3.018</b>                                  |  | 10                            | -4.106133330 | -0.939424372  | 4.554108376  | C |
|                                                       |  | 11                            | -5.257968846 | -0.524623936  | 6.649596763  | C |
| <b>Fe(144) 2.125</b>                                  |  | 12                            | -4.381493085 | -1.212131263  | 7.704762195  | C |
|                                                       |  | 13                            | -3.785932314 | -3.313133626  | 8.810168326  | C |
| <b>Fe(145) 2.279</b>                                  |  | 14                            | -2.351672168 | -3.771452483  | 8.511024932  | C |
|                                                       |  | 15                            | -0.803994357 | -4.599504414  | 6.781481678  | C |
|                                                       |  | 16                            | 0.165856443  | -3.624653588  | 6.104762349  | C |
|                                                       |  | 17                            | 0.432636894  | -1.643269507  | 4.645617398  | C |
|                                                       |  | 18                            | 0.777999541  | -0.471766812  | 5.594116243  | C |
|                                                       |  | 19                            | -0.234303865 | -1.181390444  | 3.335339874  | C |
|                                                       |  | 20                            | 0.580387586  | -0.062673063  | 2.677728043  | C |
|                                                       |  | 21                            | -0.424999937 | -2.370884296  | 2.386829695  | C |
|                                                       |  | 22                            | -0.095951040 | 1.353522055   | 7.014543204  | C |
|                                                       |  | 23                            | 0.093326106  | 0.947153677   | 8.492450891  | C |
|                                                       |  | 24                            | -1.240948723 | 2.380738642   | 6.828118869  | C |
|                                                       |  | 25                            | -1.124835266 | 3.528873941   | 7.838081111  | C |
|                                                       |  | 26                            | -1.251984999 | 2.927077470   | 5.394997808  | C |
|                                                       |  | 27                            | -0.789411907 | -0.156531628  | 10.472052417 | C |
|                                                       |  | 28                            | 0.554523274  | -0.732607429  | 10.871106548 | C |
|                                                       |  | 29                            | 4.495575396  | -12.094908889 | 4.339428327  | C |
|                                                       |  | 30                            | 5.212020110  | -10.875443205 | 3.765351143  | C |
|                                                       |  | 31                            | 5.641039156  | -8.451357177  | 4.184851945  | C |
|                                                       |  | 32                            | 6.807937512  | -8.193601830  | 5.157408787  | C |
|                                                       |  | 33                            | 4.567702873  | -7.353846217  | 4.282233823  | C |
|                                                       |  | 34                            | 5.106822896  | -5.955403375  | 3.975043871  | C |
|                                                       |  | 35                            | 3.973833530  | -4.943335451  | 3.805367548  | C |
|                                                       |  | 36                            | 4.239739763  | -2.446533724  | 3.965004096  | C |
|                                                       |  | 37                            | 9.169174906  | -7.567071077  | 5.341336941  | C |

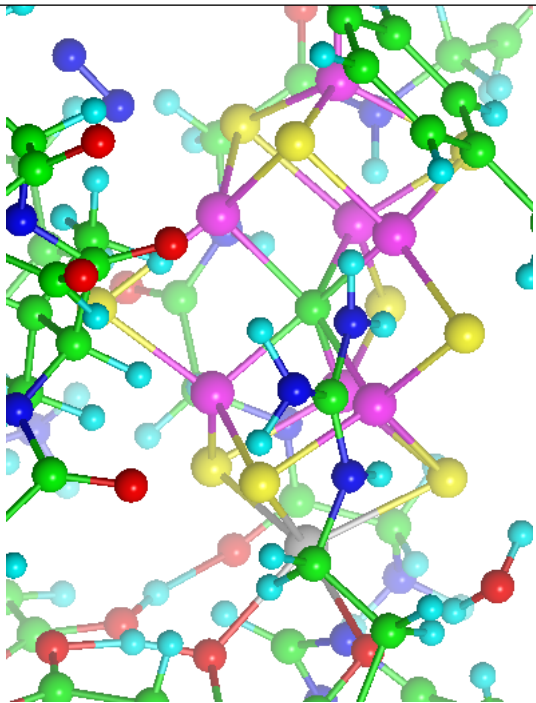

|     |              |              |              |   |
|-----|--------------|--------------|--------------|---|
| 38  | 9.562098205  | -6.106313387 | 5.364160478  | C |
| 39  | -5.470132919 | -2.212885865 | -1.959844523 | C |
| 40  | -5.708074599 | -0.745080890 | -1.556790766 | C |
| 41  | -3.968763093 | -2.526426125 | -1.769132083 | C |
| 42  | -3.577800038 | -4.017001031 | -1.856438396 | C |
| 43  | -3.239652221 | -4.532939770 | -3.254829650 | C |
| 44  | -5.835452644 | 1.528153653  | -2.503013315 | C |
| 45  | -6.960726779 | 2.106677365  | -1.634802098 | C |
| 46  | -5.809795824 | 2.135343697  | -3.912364168 | C |
| 47  | -9.243616374 | 1.807246307  | -0.795514147 | C |
| 48  | -8.971695294 | 1.794191862  | 0.712817851  | C |
| 49  | -7.492619330 | 1.088807906  | 2.536338003  | C |
| 50  | -6.255271477 | 1.920869952  | 2.870574921  | C |
| 51  | -4.519795141 | 3.470366403  | 2.115691753  | C |
| 52  | -4.934712365 | 4.797369641  | 2.793434980  | C |
| 53  | -3.787786789 | 3.859015931  | 0.822999325  | C |
| 54  | -3.157441931 | 2.741049459  | 0.054980709  | C |
| 55  | -2.725807129 | 1.479040410  | 0.383733852  | C |
| 56  | -2.256376660 | 1.803327240  | -1.761085964 | C |
| 57  | -6.590577784 | 6.621142151  | 2.742492628  | C |
| 58  | -6.643594579 | 6.750682361  | 4.262894651  | C |
| 59  | -7.994702543 | 6.814662652  | 2.125425511  | C |
| 60  | -8.481045383 | 8.227374287  | 1.993802902  | C |
| 61  | -8.393590125 | 9.300218916  | 2.859558362  | C |
| 62  | -9.484745408 | 9.879611568  | 1.019607504  | C |
| 63  | 8.923017832  | 0.666920648  | 4.372427803  | C |
| 64  | 9.850929340  | -0.528227882 | 4.275340846  | C |
| 65  | 7.498172212  | 0.160704942  | 4.029115221  | C |
| 66  | 6.452485158  | 1.246355649  | 4.120052959  | C |
| 67  | 5.783686341  | 1.511392707  | 5.328834986  | C |
| 68  | 6.106798265  | 2.012383060  | 2.993710283  | C |
| 69  | 4.792759582  | 2.494913163  | 5.413242766  | C |
| 70  | 5.130824582  | 3.007163669  | 3.066547254  | C |
| 71  | 4.468490068  | 3.239733146  | 4.274583037  | C |
| 72  | 5.982882189  | 6.296088560  | -0.771559083 | C |
| 73  | 5.070606612  | 7.500889119  | -1.058228186 | C |
| 74  | 5.132058652  | 5.073519176  | -0.448315181 | C |
| 75  | 4.339080906  | 9.152689865  | -2.743768108 | C |
| 76  | 2.866567332  | 8.888405704  | -3.069254000 | C |
| 77  | 1.081728089  | 7.155521042  | -3.178090835 | C |
| 78  | 0.418670105  | 6.847700074  | -1.810323638 | C |
| 79  | 1.112139838  | 5.917992284  | -4.108610338 | C |
| 80  | -0.184201045 | 5.145627812  | -4.379926383 | C |
| 81  | -1.194737970 | 5.794805499  | -5.338801859 | C |
| 82  | -2.562266204 | 7.854974546  | -4.969606077 | C |
| 83  | 0.605156287  | 5.903723909  | 0.436701212  | C |
| 84  | 0.493955246  | 7.156716026  | 1.314993222  | C |
| 85  | 1.416186676  | 4.863793329  | 1.238359512  | C |
| 86  | 1.781000593  | 9.046975778  | 2.179327595  | C |
| 87  | 1.337790922  | 10.459292591 | 1.837666075  | C |
| 88  | 0.212923696  | 11.875076589 | 0.203176020  | C |
| 89  | -1.048750805 | 12.558148913 | 0.786508093  | C |
| 90  | 0.183195859  | 11.903082359 | -1.328105726 | C |
| 91  | -0.999172108 | 11.165412636 | -1.945810364 | C |
| 92  | -3.168038896 | 12.266228425 | 1.982386827  | C |
| 93  | -3.067027072 | 13.364760694 | 3.030471239  | C |
| 94  | -3.999758044 | 11.073115269 | 2.532823851  | C |
| 95  | -4.248963797 | 10.019715681 | 1.476256941  | C |
| 96  | -5.359004452 | 10.119338659 | 0.622421438  | C |
| 97  | -3.353951686 | 8.954755593  | 1.275769609  | C |
| 98  | -5.558705703 | 9.204371155  | -0.414286101 | C |
| 99  | -3.519950474 | 8.048647292  | 0.224126807  | C |
| 100 | -4.620808403 | 8.191355481  | -0.616355324 | C |
| 101 | 4.415890978  | -4.316002595 | -8.569598873 | C |
| 102 | 2.994345221  | -3.923559492 | -8.204347351 | C |
| 103 | 1.606926896  | -2.272490329 | -6.969307688 | C |
| 104 | 1.276565249  | -0.891374833 | -7.542406682 | C |
| 105 | 1.857972827  | 1.491499806  | -7.469548645 | C |
| 106 | 3.117540052  | 2.350117865  | -7.505515632 | C |
| 107 | 5.417227296  | 2.741561072  | -6.832123310 | C |
| 108 | 6.096338928  | 2.956048143  | -8.169047606 | C |
| 109 | -2.246868637 | -3.247713328 | -9.353782423 | C |
| 110 | -3.192103283 | -2.064173230 | -9.117169108 | C |
| 111 | -1.978856039 | -3.973308790 | -8.015693977 | C |
| 112 | -1.378700844 | -5.372722618 | -8.245302776 | C |
| 113 | -0.862768583 | -5.942677463 | -6.943238930 | C |
| 114 | -3.440364414 | 0.279255081  | -8.471679832 | C |
| 115 | -2.790173100 | 1.518631302  | -9.051738684 | C |
| 116 | -3.924806841 | 0.422682918  | -7.008451743 | C |
| 117 | -2.805671931 | 0.255259401  | -6.013279262 | C |
| 118 | -1.935145986 | 1.316593812  | -5.707360276 | C |
| 119 | -2.548555177 | -1.009425650 | -5.456716299 | C |

|     |               |               |              |    |
|-----|---------------|---------------|--------------|----|
| 120 | -0.807169646  | 1.096533337   | -4.907828021 | C  |
| 121 | -1.423377823  | -1.225967844  | -4.654494201 | C  |
| 122 | -0.537528629  | -0.176872717  | -4.392403998 | C  |
| 123 | 7.609840446   | -6.963967265  | -4.059984845 | C  |
| 124 | 8.693629688   | -7.168961018  | -2.991794507 | C  |
| 125 | 6.212830449   | -7.176529111  | -3.458579326 | C  |
| 126 | 5.052926343   | -6.858023480  | -4.346766045 | C  |
| 127 | 4.743214680   | -7.433064343  | -5.563065585 | C  |
| 128 | 3.074158988   | -6.129409358  | -4.919073249 | C  |
| 129 | 9.643039971   | -8.525135032  | -1.224128727 | C  |
| 130 | 11.056629619  | -8.393534892  | -1.746173905 | C  |
| 131 | -0.116947533  | -6.807618610  | -0.126575367 | C  |
| 132 | 1.335598946   | -7.044648036  | 0.316123538  | C  |
| 133 | 2.327454583   | -7.293310080  | -0.851414455 | C  |
| 134 | 2.152679598   | -8.715919612  | -1.435674226 | C  |
| 135 | 3.251413527   | -9.165980757  | -2.402828094 | C  |
| 136 | 3.159075780   | -10.648996107 | -2.823271821 | C  |
| 137 | 3.772670344   | -7.154852888  | -0.333157991 | C  |
| 138 | 3.617599250   | -1.074490967  | -1.808908596 | C  |
| 139 | 3.953052496   | -2.316274524  | -3.375689237 | Fe |
| 140 | 2.228358447   | 0.323161820   | -1.367030902 | Fe |
| 141 | 4.903067332   | 0.017539869   | -0.761037513 | Fe |
| 142 | 4.165142387   | 0.212107394   | -3.245657912 | Fe |
| 143 | 4.001061194   | 2.336043914   | -1.650990757 | Fe |
| 144 | 4.605098766   | -2.532098226  | -0.881301532 | Fe |
| 145 | 2.132474232   | -2.355733232  | -1.532088326 | Fe |
| 146 | -7.117074890  | -6.928944139  | -0.172036890 | H  |
| 147 | -7.141411815  | -5.918864750  | -1.453405391 | H  |
| 148 | -10.248490489 | -3.874166403  | 0.684481601  | H  |
| 149 | -9.427372194  | -5.306951881  | -1.032057036 | H  |
| 150 | -9.444333705  | -6.444171520  | 0.312404087  | H  |
| 151 | -8.288077647  | -1.999784704  | 1.403212706  | H  |
| 152 | -9.439018248  | -4.716459215  | 3.372336395  | H  |
| 153 | -9.950622459  | -2.048560333  | 2.037057684  | H  |
| 154 | -8.773887390  | -5.416851076  | 5.482173751  | H  |
| 155 | -6.781517221  | -5.197385766  | 3.157550354  | H  |
| 156 | -8.476276437  | -3.720364735  | 5.928084760  | H  |
| 157 | -3.133312022  | -1.558001856  | 2.756283238  | H  |
| 158 | -5.541704570  | -3.135784812  | 2.665986098  | H  |
| 159 | -4.543834009  | -5.798652243  | 2.936284896  | H  |
| 160 | -4.929319692  | 0.520529683   | 6.591766188  | H  |
| 161 | -6.025615130  | -1.586009129  | 4.941078082  | H  |
| 162 | -4.353998071  | -5.850599917  | 4.705962954  | H  |
| 163 | -4.791615381  | -0.970523180  | 2.494612480  | H  |
| 164 | -5.109060153  | -3.068576289  | 7.145694736  | H  |
| 165 | -6.303030835  | -0.543795251  | 6.987150291  | H  |
| 166 | -0.968675386  | -3.197939401  | 2.867478820  | H  |
| 167 | -0.981702275  | -2.059897061  | 1.490631286  | H  |
| 168 | 0.546150385   | -2.744950972  | 2.026693509  | H  |
| 169 | -1.221622427  | -0.769871235  | 3.605659910  | H  |
| 170 | -4.379315086  | -4.211235137  | 9.036019999  | H  |
| 171 | -1.375783074  | 2.127449569   | 4.651738471  | H  |
| 172 | -1.717424843  | -0.092108769  | 8.558038998  | H  |
| 173 | -1.181735431  | 3.181393293   | 8.879631114  | H  |
| 174 | 0.100168562   | 0.254487930   | 1.741560856  | H  |
| 175 | 1.586352496   | -0.406897395  | 2.397148145  | H  |
| 176 | 8.921305932   | 1.003497713   | 5.427270769  | H  |
| 177 | -2.079447576  | 3.641045805   | 5.265025968  | H  |
| 178 | -1.942738095  | 4.246683288   | 7.678052135  | H  |
| 179 | -0.309373238  | 3.454990616   | 5.177921039  | H  |
| 180 | -0.171322020  | 4.065941999   | 7.710128942  | H  |
| 181 | -2.197409500  | 1.857199738   | 7.007531555  | H  |
| 182 | 0.858041791   | 1.824449694   | 6.736062602  | H  |
| 183 | -1.223983173  | -0.059540803  | 5.848496570  | H  |
| 184 | 0.686529568   | 0.817034333   | 3.332515254  | H  |
| 185 | 1.748793673   | 4.060670001   | 0.565896753  | H  |
| 186 | 0.729946265   | 4.435744167   | 1.987044024  | H  |
| 187 | 2.783969852   | 4.930304239   | 2.648494960  | H  |
| 188 | 3.079575247   | 4.269713549   | 5.162594714  | H  |
| 189 | 4.852794208   | 3.573215413   | 2.178085139  | H  |
| 190 | 6.576764271   | 1.803908212   | 2.029836742  | H  |
| 191 | 6.022299984   | 0.922554570   | 6.218159555  | H  |
| 192 | -1.388669382  | -2.659247086  | 5.169140732  | H  |
| 193 | -0.981413249  | -5.432078265  | 6.082802438  | H  |
| 194 | -0.285934513  | -4.992571129  | 7.663189565  | H  |
| 195 | -2.800260730  | -3.929495221  | 6.497329703  | H  |
| 196 | -3.738155469  | -2.700061415  | 9.718309454  | H  |
| 197 | 4.261625057   | 2.661885535   | 6.353749622  | H  |
| 198 | 1.389616824   | -2.118351547  | 4.402891548  | H  |
| 199 | -1.007499103  | 0.716932800   | 11.108088386 | H  |
| 200 | -1.546170803  | -0.929928815  | 10.676526180 | H  |
| 201 | 1.094656415   | -1.277371475  | 10.062458294 | H  |

|     |               |              |               |   |
|-----|---------------|--------------|---------------|---|
| 202 | 10.017192432  | -8.170408844 | 4.982387173   | H |
| 203 | -2.003102046  | -5.828639020 | -4.238142699  | H |
| 204 | 0.921603078   | -6.086213725 | -1.699836047  | H |
| 205 | -2.158795801  | -6.044453967 | -8.629282783  | H |
| 206 | -0.566456006  | -5.322673332 | -8.984314163  | H |
| 207 | -2.914456764  | -4.077906153 | -7.444574070  | H |
| 208 | -2.154665082  | 1.325490839  | -9.947409436  | H |
| 209 | -2.839599966  | -3.928311904 | -9.984432990  | H |
| 210 | -3.388858682  | -1.942073697 | -2.502246385  | H |
| 211 | -4.402769416  | -4.643504515 | -1.474611370  | H |
| 212 | -1.606670767  | -0.835809066 | -8.570870633  | H |
| 213 | -4.345436368  | 0.134383937  | -9.097459933  | H |
| 214 | -0.388410510  | -2.345096497 | -9.553437568  | H |
| 215 | -1.672390754  | -5.701173513 | -2.508228839  | H |
| 216 | -1.304778700  | -3.353543898 | -7.403419208  | H |
| 217 | -0.593262709  | -3.686949301 | -10.482157292 | H |
| 218 | -6.849013160  | -2.817432199 | -3.374223447  | H |
| 219 | -3.683480516  | -2.163790187 | -0.770872994  | H |
| 220 | 0.934372138   | -5.317193959 | -7.446433356  | H |
| 221 | -2.724155413  | -4.204007013 | -1.189383738  | H |
| 222 | -3.843183156  | 2.970030194  | 2.822396290   | H |
| 223 | -2.760384456  | 0.946262666  | 1.325649052   | H |
| 224 | -8.322735797  | 1.505865392  | 3.123540243   | H |
| 225 | -7.294106150  | 0.585694090  | 0.472616284   | H |
| 226 | -6.728333335  | 4.701235799  | 1.799628125   | H |
| 227 | -7.929009676  | 9.421899610  | 3.831716428   | H |
| 228 | -6.942189122  | 5.808269482  | 4.782499194   | H |
| 229 | -8.719649363  | 6.198035282  | 2.685956701   | H |
| 230 | -5.892824170  | 7.376705461  | 2.347113934   | H |
| 231 | -10.027356740 | 10.505484459 | 0.315435167   | H |
| 232 | -3.008050884  | 4.588164788  | 1.098853052   | H |
| 233 | -4.498769959  | 4.380899548  | 0.162552953   | H |
| 234 | -9.142350047  | 11.284400481 | 2.583564621   | H |
| 235 | -7.967224348  | 6.399199036  | 1.105906730   | H |
| 236 | -6.050833949  | 2.569704527  | 0.902240978   | H |
| 237 | -7.323729770  | 0.067342157  | 2.908509354   | H |
| 238 | -9.574994360  | 2.826213973  | -1.037460401  | H |
| 239 | -1.870929754  | 1.652365588  | -2.767149729  | H |
| 240 | -10.078846401 | 1.124405375  | -0.999882719  | H |
| 241 | 10.189340912  | 2.164371511  | 3.772871270   | H |
| 242 | 8.634256003   | 2.397132498  | 3.316676862   | H |
| 243 | 2.072848024   | 5.740659461  | -1.144439423  | H |
| 244 | -0.417772239  | 5.522394654  | 0.310489680   | H |
| 245 | 2.304281824   | 7.775830929  | 0.582040683   | H |
| 246 | -3.076540384  | 3.777034603  | -1.838666778  | H |
| 247 | -4.476607305  | 4.606028740  | -3.146758067  | H |
| 248 | -5.940102157  | 3.926932422  | -4.698006455  | H |
| 249 | -4.129475230  | 5.815393980  | -2.168907412  | H |
| 250 | -4.942108526  | 1.722252002  | -4.452055026  | H |
| 251 | -6.729112223  | 1.860421451  | -4.451375387  | H |
| 252 | 1.142103586   | 11.540678710 | -1.724649153  | H |
| 253 | 0.083944525   | 12.958673727 | -1.625494538  | H |
| 254 | 0.270479985   | 10.177344153 | -3.258195117  | H |
| 255 | -1.454176720  | 9.831996940  | -3.388521929  | H |
| 256 | -2.319204867  | 9.440171591  | -6.252530789  | H |
| 257 | -1.727341784  | 5.013483088  | -5.902626996  | H |
| 258 | -6.434503915  | 9.287671992  | -1.063600128  | H |
| 259 | -2.505179645  | 8.802246061  | 1.947886082   | H |
| 260 | -3.664294099  | 8.136222881  | -3.250710764  | H |
| 261 | 1.828786450   | 5.202332354  | -3.675702623  | H |
| 262 | 3.160580329   | 6.883602704  | -2.790239049  | H |
| 263 | -0.684679939  | 4.868390815  | -3.438193017  | H |
| 264 | -8.167891986  | 0.550114529  | -2.163700728  | H |
| 265 | 4.803313441   | 9.599473298  | -3.632984606  | H |
| 266 | -5.858119131  | -0.433265554 | -3.518586601  | H |
| 267 | 1.547511841   | 6.243439141  | -5.067738286  | H |
| 268 | -2.775448038  | 7.272138971  | 0.044685678   | H |
| 269 | 4.343833673   | 9.908813287  | -1.945350369  | H |
| 270 | -1.694677851  | 7.931637562  | -6.840376779  | H |
| 271 | -3.895789775  | 9.329365593  | -4.484512554  | H |
| 272 | -5.256992371  | -3.094723757 | -3.809969463  | H |
| 273 | -6.033743125  | -2.820165983 | -1.226024672  | H |
| 274 | -6.084317372  | 10.923560595 | 0.768798985   | H |
| 275 | -4.916826371  | 1.821961308  | -1.978030535  | H |
| 276 | 0.503651292   | 7.972621689  | -3.620165294  | H |
| 277 | -0.657274123  | 6.409765419  | -6.072549778  | H |
| 278 | 0.123493497   | 4.196755168  | -4.843919077  | H |
| 279 | -2.715961116  | 6.140207352  | -3.886635788  | H |
| 280 | 1.282558966   | 8.755643302  | 3.116195274   | H |
| 281 | 0.387039320   | 9.728456173  | 0.187154633   | H |
| 282 | 1.032355934   | 12.537807290 | 0.523707964   | H |
| 283 | 2.862660670   | 9.080322920  | 2.366372307   | H |

|     |              |               |              |   |
|-----|--------------|---------------|--------------|---|
| 284 | -1.650413395 | 10.803790436  | 1.609816539  | H |
| 285 | 5.043779073  | -3.417831962  | -8.662984251 | H |
| 286 | 4.799478523  | -4.884518056  | -7.697234110 | H |
| 287 | 7.711055121  | -5.914508250  | -4.375591826 | H |
| 288 | 5.343882397  | -5.522687110  | -9.924088043 | H |
| 289 | 3.744060806  | -5.822824900  | -9.756115939 | H |
| 290 | 5.807445492  | 4.230049396   | -0.255347872 | H |
| 291 | 6.343749115  | 6.879080126   | 1.153981159  | H |
| 292 | 5.728560726  | 7.553444757   | -3.006524417 | H |
| 293 | 4.519444918  | 5.265942926   | 0.443460529  | H |
| 294 | 7.514424906  | 7.347928523   | 0.108261712  | H |
| 295 | 6.146019459  | 2.251914358   | -6.167248170 | H |
| 296 | 6.594909198  | 6.078718559   | -1.660698416 | H |
| 297 | 4.119719937  | -7.378984999  | 5.289687563  | H |
| 298 | 6.016793351  | -8.495885229  | 3.155656603  | H |
| 299 | 4.269121994  | 0.996425426   | -6.405211733 | H |
| 300 | 4.534393651  | -0.435251921  | 3.777206834  | H |
| 301 | 1.441318995  | 1.470409247   | -8.484624442 | H |
| 302 | -1.226480392 | -2.216957495  | -4.239166687 | H |
| 303 | 1.129601479  | 2.033320574   | -6.842913402 | H |
| 304 | 3.403164717  | -4.839675116  | 4.736047254  | H |
| 305 | 2.594813309  | -0.105221511  | -6.198639435 | H |
| 306 | 3.266078364  | -5.297138803  | 3.037423276  | H |
| 307 | 3.777629558  | -7.615982913  | 3.560549987  | H |
| 308 | 5.691075141  | -5.974505547  | 3.043511969  | H |
| 309 | 5.780387216  | -5.612545361  | 4.776388783  | H |
| 310 | -4.697130782 | -0.340846466  | -6.839175569 | H |
| 311 | 4.535806545  | -9.880143301  | 5.361359366  | H |
| 312 | 3.633687843  | -12.278469663 | 3.680561365  | H |
| 313 | 0.340435974  | -0.340195772  | -3.765242752 | H |
| 314 | 4.731837554  | -12.211340256 | 6.382749462  | H |
| 315 | 3.193795115  | -12.480468197 | 5.885835582  | H |
| 316 | 4.870570533  | -3.598844043  | 2.438325053  | H |
| 317 | -0.111994664 | 1.909210321   | -4.683950337 | H |
| 318 | -3.229759138 | -1.839657294  | -5.657685100 | H |
| 319 | 6.707239351  | -10.650812613 | -1.021581858 | H |
| 320 | 6.113226006  | -8.232042107  | -3.150997596 | H |
| 321 | 5.733995871  | -8.808984176  | 0.448787056  | H |
| 322 | 5.877449424  | -11.149407737 | -2.235417969 | H |
| 323 | 5.859162505  | 2.192812638   | -8.947867768 | H |
| 324 | 5.851491035  | -5.633596546  | 0.253135783  | H |
| 325 | 1.375671077  | -7.868262124  | 1.038431296  | H |
| 326 | 3.709779522  | -2.302889243  | -7.170447074 | H |
| 327 | 2.124917836  | -9.405510682  | -0.578467391 | H |
| 328 | 2.949388698  | -7.229419116  | -6.716298685 | H |
| 329 | 2.108280813  | -5.641540455  | -4.927863285 | H |
| 330 | 5.181481868  | -12.949022195 | 4.207444187  | H |
| 331 | 4.924655064  | -1.355555041  | 2.332923371  | H |
| 332 | 7.671354219  | -6.632357814  | 1.446491837  | H |
| 333 | 6.875843139  | -4.474974228  | 0.392376501  | H |
| 334 | 8.015381467  | -7.710843978  | 3.528345405  | H |
| 335 | 3.271372840  | -3.141549560  | 5.628832233  | H |
| 336 | 3.206889475  | -8.560551375  | -3.320624198 | H |
| 337 | 4.242487033  | -8.997508722  | -1.959921824 | H |
| 338 | 1.171640425  | -8.768916803  | -1.930762860 | H |
| 339 | 1.672999439  | -2.236045313  | -5.870751893 | H |
| 340 | -2.126404659 | 2.306511489   | -6.131440801 | H |
| 341 | -4.398284756 | 1.413038942   | -6.922453403 | H |
| 342 | 1.642388949  | -6.123505094  | 0.840197493  | H |
| 343 | 7.652018710  | -8.177616191  | 1.289445468  | H |
| 344 | 6.316663158  | -9.962251422  | 1.306694989  | H |
| 345 | 3.274899105  | -1.461084613  | 5.455702465  | H |
| 346 | 5.287675731  | -8.140892637  | -6.176752702 | H |
| 347 | 6.124080649  | -6.584224516  | -2.540207232 | H |
| 348 | 0.812435217  | -2.962223317  | -7.261013303 | H |
| 349 | 5.170784238  | 3.720408049   | -6.391768764 | H |
| 350 | 7.256790072  | -0.652453108  | 4.729915977  | H |
| 351 | 7.506987632  | -0.267585423  | 3.014193241  | H |
| 352 | 8.766729594  | -7.613052397  | -5.625634839 | H |
| 353 | 7.841193781  | -8.796618909  | -4.977700621 | H |
| 354 | 9.527662665  | -9.555356939  | -0.852663389 | H |
| 355 | 7.914650163  | -9.017738409  | -2.370824841 | H |
| 356 | 11.176051166 | -8.610555034  | -2.834490910 | H |
| 357 | 9.496490604  | -7.846313334  | -0.368655121 | H |
| 358 | 10.137461333 | -0.799926891  | 3.230646817  | H |
| 359 | -2.092132362 | 13.414399859  | 3.569941354  | H |
| 360 | 8.959050602  | -7.859733131  | 6.386064948  | H |
| 361 | 8.716590581  | -5.388405751  | 5.233824244  | H |
| 362 | -3.689542771 | 12.689588998  | 1.108103444  | H |
| 363 | -3.472766055 | 10.637520950  | 3.396244190  | H |
| 364 | -4.952610574 | 11.483192760  | 2.897225277  | H |
| 365 | -5.659844546 | 7.379059666   | -2.050529991 | H |

|     |              |               |               |    |
|-----|--------------|---------------|---------------|----|
| 366 | -1.570072332 | 0.070780265   | -0.808184825  | H  |
| 367 | 3.507627559  | -4.655709414  | -2.058968429  | Mo |
| 368 | -7.732318842 | -6.531199460  | -0.886275056  | N  |
| 369 | -9.335962645 | -3.816931585  | 1.130830747   | N  |
| 370 | -8.819219415 | -4.090223108  | 3.880733789   | N  |
| 371 | -6.213579815 | -5.156734059  | 4.005982952   | N  |
| 372 | -4.672967875 | -2.933542819  | 3.155943705   | N  |
| 373 | -5.193940329 | -1.140732692  | 5.334521959   | N  |
| 374 | -4.465497134 | -2.566233058  | 7.763775110   | N  |
| 375 | -2.078054087 | -4.050769372  | 7.208487761   | N  |
| 376 | -0.382493390 | -2.643928760  | 5.343699952   | N  |
| 377 | -0.275161611 | 0.197336344   | 6.131659082   | N  |
| 378 | -0.857552586 | 0.156722825   | 9.052792932   | N  |
| 379 | 4.019869414  | -11.904735506 | 5.716142760   | N  |
| 380 | 5.054300292  | -9.749125899  | 4.486734957   | N  |
| 381 | 4.473258725  | -3.632287635  | 3.379855260   | N  |
| 382 | 0.762866501  | 1.944633883   | -0.741816588  | N  |
| 383 | 0.064018795  | 2.694583039   | -0.299360030  | N  |
| 384 | 3.767443630  | -2.342551043  | 5.229114647   | N  |
| 385 | 4.501692858  | -1.322042028  | 3.282255355   | N  |
| 386 | 7.971526764  | -7.823904499  | 4.565974256   | N  |
| 387 | -5.904169028 | -2.429414526  | -3.345737705  | N  |
| 388 | -2.248165667 | -5.439082019  | -3.321560815  | N  |
| 389 | -5.882917159 | 0.081880531   | -2.621633684  | N  |
| 390 | -8.126760270 | 1.421784662   | -1.639876156  | N  |
| 391 | -7.901300993 | 1.070111639   | 1.144410033   | N  |
| 392 | -5.654650416 | 2.598255776   | 1.845672197   | N  |
| 393 | -2.853831275 | 2.907948016   | -1.288059027  | N  |
| 394 | -2.184258898 | 0.918547831   | -0.758506493  | N  |
| 395 | -6.139051954 | 5.279971470   | 2.392840142   | N  |
| 396 | -9.166156921 | 8.602280805   | 0.848672107   | N  |
| 397 | -9.034852705 | 10.340953724  | 2.220870613   | N  |
| 398 | 9.361797556  | 1.683027798   | 3.412680098   | N  |
| 399 | 6.897962811  | 6.566427691   | 0.350168685   | N  |
| 400 | 5.121330195  | 8.004702690   | -2.326948092  | N  |
| 401 | 2.463162067  | 7.603670849   | -3.021325696  | N  |
| 402 | -2.195530862 | 6.615593530   | -4.645907933  | N  |
| 403 | -2.126967340 | 8.457659153   | -6.090028857  | N  |
| 404 | -3.328589737 | 8.571340156   | -4.113679590  | N  |
| 405 | 1.169624792  | 6.186831975   | -0.884763074  | N  |
| 406 | 1.504835587  | 8.057482027   | 1.155873042   | N  |
| 407 | 0.513068301  | 10.568222089  | 0.751973442   | N  |
| 408 | -0.704596557 | 10.437066239  | -3.056734463  | N  |
| 409 | -1.843734823 | 11.802276021  | 1.585935209   | N  |
| 410 | 4.432776920  | -5.068028814  | -9.827878881  | N  |
| 411 | 2.864580545  | -2.776409591  | -7.506751207  | N  |
| 412 | 1.999660677  | 0.119703166   | -7.014496931  | N  |
| 413 | 4.248900392  | 1.882987649   | -6.923479933  | N  |
| 414 | -1.068169218 | -2.851661308  | -10.133709653 | N  |
| 415 | -2.617614290 | -0.888283858  | -8.733431683  | N  |
| 416 | 7.834851384  | -7.808280263  | -5.248432684  | N  |
| 417 | 3.996725318  | -6.031567856  | -3.963332846  | N  |
| 418 | 3.494952157  | -6.960228848  | -5.902156152  | N  |
| 419 | 8.656490710  | -8.321412889  | -2.268669264  | N  |
| 420 | -7.179412564 | -4.547831188  | 1.129843349   | O  |
| 421 | -7.704157775 | -2.102204117  | 3.858876416   | O  |
| 422 | -6.098415916 | -4.535268533  | 6.199908657   | O  |
| 423 | -2.998501456 | -3.726387005  | 4.479763449   | O  |
| 424 | -3.124845785 | -0.279477076  | 4.929859382   | O  |
| 425 | -3.673363284 | -0.545450229  | 8.479432885   | O  |
| 426 | -1.546587297 | -3.923038072  | 9.440361785   | O  |
| 427 | 1.389916589  | -3.788980197  | 6.251210534   | O  |
| 428 | 1.960646801  | -0.160975063  | 5.833360875   | O  |
| 429 | 1.070408979  | 1.350182795   | 9.145864499   | O  |
| 430 | 0.991713760  | -0.676191258  | 12.011220098  | O  |
| 431 | 5.852816745  | -10.981845115 | 2.698865508   | O  |
| 432 | 6.658574094  | -8.328627132  | 6.384451971   | O  |
| 433 | 10.707236563 | -5.715270601  | 5.531083215   | O  |
| 434 | -5.718032485 | -0.348104524  | -0.374668022  | O  |
| 435 | -3.868520881 | -4.153618657  | -4.271906317  | O  |
| 436 | -6.778950913 | 3.133555307   | -0.956432882  | O  |
| 437 | -5.713508846 | 3.571298484   | -3.820148574  | O  |
| 438 | -9.732260015 | 2.417359983   | 1.465905024   | O  |
| 439 | -5.837291937 | 1.965377860   | 4.033100978   | O  |
| 440 | -4.181008816 | 5.403906690   | 3.559830333   | O  |
| 441 | -6.433447337 | 7.783939436   | 4.874560257   | O  |
| 442 | 10.251233834 | -1.173266907  | 5.234285494   | O  |
| 443 | 3.480401473  | 4.206964742   | 4.276850470   | O  |
| 444 | 4.335197371  | 7.995840559   | -0.185981726  | O  |
| 445 | 2.128084869  | 9.852053299   | -3.360153944  | O  |
| 446 | -0.750794080 | 7.208692037   | -1.596875485  | O  |
| 447 | -0.417977151 | 7.285077292   | 2.141986315   | O  |



|     |              |               |              |   |
|-----|--------------|---------------|--------------|---|
| 448 | 2.538829791  | 5.476650564   | 1.873450060  | O |
| 449 | 1.697240306  | 11.425705795  | 2.520795484  | O |
| 450 | -1.269043772 | 13.757354347  | 0.563238282  | O |
| 451 | -2.150381780 | 11.279335708  | -1.499445191 | O |
| 452 | -3.989398046 | 14.120378544  | 3.294157229  | O |
| 453 | -4.747438504 | 7.309456744   | -1.708577658 | O |
| 454 | 2.030653611  | -4.665989098  | -8.517196741 | O |
| 455 | 0.427525673  | -0.736754378  | -8.446917529 | O |
| 456 | 3.063636030  | 3.470653467   | -8.041783017 | O |
| 457 | 6.882292610  | 3.865153494   | -8.383489950 | O |
| 458 | -4.421117694 | -2.184016034  | -9.250633884 | O |
| 459 | -1.583169969 | -6.487675590  | -6.112576749 | O |
| 460 | 0.451723712  | -5.779567543  | -6.692752075 | O |
| 461 | -2.963495959 | 2.654668297   | -8.632020337 | O |
| 462 | 9.613111139  | -6.344632025  | -2.821469812 | O |
| 463 | 12.022583690 | -8.148410007  | -1.036741635 | O |
| 464 | -0.251009145 | -6.164553712  | -1.269390645 | O |
| 465 | -1.068029076 | -7.155328262  | 0.588527269  | O |
| 466 | 4.257143081  | -11.306534914 | -2.893310668 | O |
| 467 | 2.014148916  | -11.106167569 | -3.101011707 | O |
| 468 | 4.506745492  | -6.220001137  | -0.865857130 | O |
| 469 | 4.189382484  | -7.941710676  | 0.542230524  | O |
| 470 | 2.070554301  | -6.286991736  | -1.858053907 | O |
| 471 | 8.139412026  | -7.447169160  | 1.759043433  | O |
| 472 | 6.549302524  | -5.268844605  | 0.856689691  | O |
| 473 | -3.725223089 | 5.117172274   | -2.740984976 | O |
| 474 | 6.805934172  | -11.162538645 | -1.855967900 | O |
| 475 | 6.545929720  | -9.374613065  | 0.541613357  | O |
| 476 | 4.004202744  | 4.638738918   | -1.848857062 | S |
| 477 | 2.444993574  | 1.684709495   | -3.246115766 | S |
| 478 | 2.000468891  | -3.443664914  | -3.468351762 | S |
| 479 | 3.485898451  | 1.401455680   | 0.312937329  | S |
| 480 | 0.432588574  | -1.075124016  | -1.012066645 | S |
| 481 | 4.509998539  | -1.024336103  | -5.092029549 | S |
| 482 | 2.938352939  | -3.704925279  | 0.071664047  | S |
| 483 | 5.957135372  | 1.281994050   | -2.279458068 | S |
| 484 | 5.585534948  | -3.621979146  | -2.554953249 | S |
| 485 | 6.029938604  | -1.474133929  | 0.433294028  | S |
|     | end          |               |              |   |

|                                                                                                                                                                                                                                                    |                             |              |               |              |
|----------------------------------------------------------------------------------------------------------------------------------------------------------------------------------------------------------------------------------------------------|-----------------------------|--------------|---------------|--------------|
| <b>rest-3b5</b><br><b>2N2 associated</b><br><b>35, S=1/2</b><br><br><b>Fe( 139) -2.117</b><br><b>Fe( 140) -1.543</b><br><b>Fe( 141) -2.746</b><br><b>Fe( 142) 2.306</b><br><b>Fe( 143) 2.803</b><br><b>Fe( 144) 2.088</b><br><b>Fe( 145) 0.118</b> | <b>bm522n2x3b5dtb.car_3</b> |              |               |              |
|                                                                                                                                                                                                                                                    | C1                          | -8.349430109 | -4.643542201  | 0.715645695  |
|                                                                                                                                                                                                                                                    | C2                          | -8.784235998 | -5.752813470  | -0.249149844 |
|                                                                                                                                                                                                                                                    | C3                          | -9.047352501 | -2.621632423  | 1.920786285  |
|                                                                                                                                                                                                                                                    | C4                          | -8.471718797 | -2.910262086  | 3.304720067  |
|                                                                                                                                                                                                                                                    | C5                          | -8.288938131 | -4.476821679  | 5.172262408  |
|                                                                                                                                                                                                                                                    | C6                          | -6.776577259 | -4.713225795  | 5.167689714  |
|                                                                                                                                                                                                                                                    | C7                          | -4.786993209 | -5.273857954  | 3.870475182  |
|                                                                                                                                                                                                                                                    | C8                          | -4.076298394 | -3.919326563  | 3.853131579  |
|                                                                                                                                                                                                                                                    | C9                          | -4.154893073 | -1.582727762  | 3.145635687  |
|                                                                                                                                                                                                                                                    | C10                         | -4.107552005 | -0.945571966  | 4.543927070  |
|                                                                                                                                                                                                                                                    | C11                         | -5.263747345 | -0.523228458  | 6.638042973  |
|                                                                                                                                                                                                                                                    | C12                         | -4.386889467 | -1.210915430  | 7.692747389  |
|                                                                                                                                                                                                                                                    | C13                         | -3.794867157 | -3.312400692  | 8.801108084  |
|                                                                                                                                                                                                                                                    | C14                         | -2.360543816 | -3.770736440  | 8.503400801  |
|                                                                                                                                                                                                                                                    | C15                         | -0.810329062 | -4.592196632  | 6.773320828  |
|                                                                                                                                                                                                                                                    | C16                         | 0.155825425  | -3.614578433  | 6.096542686  |
|                                                                                                                                                                                                                                                    | C17                         | 0.418982116  | -1.639358270  | 4.632410899  |
|                                                                                                                                                                                                                                                    | C18                         | 0.757166753  | -0.461124953  | 5.574980969  |
|                                                                                                                                                                                                                                                    | C19                         | -0.230855444 | -1.183634433  | 3.309818628  |
|                                                                                                                                                                                                                                                    | C20                         | 0.588760182  | -0.063065796  | 2.660748985  |
|                                                                                                                                                                                                                                                    | C21                         | -0.400147009 | -2.376069018  | 2.360979801  |
|                                                                                                                                                                                                                                                    | C22                         | -0.112473696 | 1.355484698   | 7.002891135  |
|                                                                                                                                                                                                                                                    | C23                         | 0.082158044  | 0.947243610   | 8.480038088  |
|                                                                                                                                                                                                                                                    | C24                         | -1.256098611 | 2.382789904   | 6.816271212  |
|                                                                                                                                                                                                                                                    | C25                         | -1.136397073 | 3.532711901   | 7.823010590  |
|                                                                                                                                                                                                                                                    | C26                         | -1.266443953 | 2.924543992   | 5.380810104  |
|                                                                                                                                                                                                                                                    | C27                         | -0.797205922 | -0.150188795  | 10.462850388 |
|                                                                                                                                                                                                                                                    | C28                         | 0.539609758  | -0.741881563  | 10.860786820 |
|                                                                                                                                                                                                                                                    | C29                         | 4.480500687  | -12.085119429 | 4.332367054  |
|                                                                                                                                                                                                                                                    | C30                         | 5.200366752  | -10.865914989 | 3.759043238  |
|                                                                                                                                                                                                                                                    | C31                         | 5.639487765  | -8.447173073  | 4.190588997  |
|                                                                                                                                                                                                                                                    | C32                         | 6.809169658  | -8.190111319  | 5.159957753  |
|                                                                                                                                                                                                                                                    | C33                         | 4.572725890  | -7.345457008  | 4.302360348  |
|                                                                                                                                                                                                                                                    | C34                         | 5.126041393  | -5.949091509  | 4.013602552  |
|                                                                                                                                                                                                                                                    | C35                         | 4.008079311  | -4.916350339  | 3.893814679  |
|                                                                                                                                                                                                                                                    | C36                         | 4.245245175  | -2.414051691  | 4.030692361  |
|                                                                                                                                                                                                                                                    | C37                         | 9.168027580  | -7.549740290  | 5.336461779  |
|                                                                                                                                                                                                                                                    | C38                         | 9.550971687  | -6.086075864  | 5.348571345  |
|                                                                                                                                                                                                                                                    | C39                         | -5.476268812 | -2.196101769  | -1.970321174 |
|                                                                                                                                                                                                                                                    | C40                         | -5.713138343 | -0.726796910  | -1.573239580 |
|                                                                                                                                                                                                                                                    | C41                         | -3.977469170 | -2.513488776  | -1.780087477 |

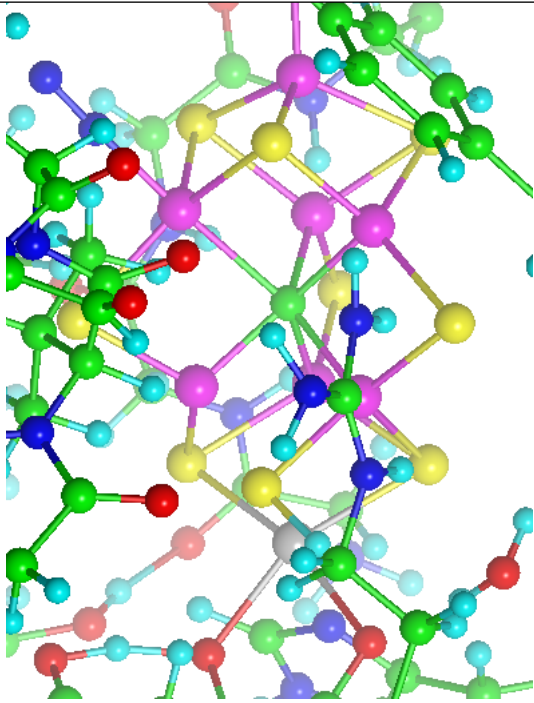

|      |              |              |              |
|------|--------------|--------------|--------------|
| C42  | -3.596479444 | -4.005836148 | -1.869303765 |
| C43  | -3.250163935 | -4.514008526 | -3.268485860 |
| C44  | -5.861359371 | 1.540512904  | -2.527841139 |
| C45  | -6.975556374 | 2.121871415  | -1.646473966 |
| C46  | -5.848731305 | 2.144282263  | -3.938318535 |
| C47  | -9.256897590 | 1.841553324  | -0.794729457 |
| C48  | -8.981504496 | 1.819270137  | 0.712857467  |
| C49  | -7.501449207 | 1.094035828  | 2.527776531  |
| C50  | -6.268035727 | 1.930855825  | 2.863892309  |
| C51  | -4.526360493 | 3.473799342  | 2.113615795  |
| C52  | -4.922328614 | 4.815043393  | 2.777915363  |
| C53  | -3.770932178 | 3.847263270  | 0.829266223  |
| C54  | -3.162355715 | 2.724920777  | 0.054232712  |
| C55  | -2.742981386 | 1.457670504  | 0.376736864  |
| C56  | -2.299202735 | 1.781303194  | -1.776862262 |
| C57  | -6.583139154 | 6.638393857  | 2.749713283  |
| C58  | -6.634725975 | 6.769993918  | 4.270674473  |
| C59  | -7.988900798 | 6.832285481  | 2.134578804  |
| C60  | -8.476740269 | 8.244433957  | 2.001813680  |
| C61  | -8.389270543 | 9.319640266  | 2.864611417  |
| C62  | -9.489365208 | 9.891409660  | 1.027369640  |
| C63  | 8.927725527  | 0.683251023  | 4.353414545  |
| C64  | 9.855343296  | -0.513063510 | 4.255322051  |
| C65  | 7.502879708  | 0.177077887  | 4.012017780  |
| C66  | 6.453168294  | 1.258611938  | 4.113549064  |
| C67  | 5.782552258  | 1.507187744  | 5.325166075  |
| C68  | 6.107065627  | 2.040466510  | 2.997994827  |
| C69  | 4.789638543  | 2.487377995  | 5.421643209  |
| C70  | 5.128177780  | 3.031627135  | 3.082656512  |
| C71  | 4.462478697  | 3.245808999  | 4.292950692  |
| C72  | 5.967376599  | 6.309004730  | -0.779499174 |
| C73  | 5.050990186  | 7.510329618  | -1.064918459 |
| C74  | 5.126824120  | 5.076170383  | -0.448406192 |
| C75  | 4.319212994  | 9.166445781  | -2.746029492 |
| C76  | 2.848186926  | 8.906644070  | -3.079645727 |
| C77  | 1.063957006  | 7.163661191  | -3.172963259 |
| C78  | 0.409574890  | 6.848374903  | -1.802167968 |
| C79  | 1.094109895  | 5.930022498  | -4.106658837 |
| C80  | -0.201153686 | 5.156602507  | -4.381875104 |
| C81  | -1.211172819 | 5.807298634  | -5.341244999 |
| C82  | -2.576867522 | 7.861511162  | -4.968947309 |
| C83  | 0.625792932  | 5.906931008  | 0.449006950  |
| C84  | 0.504216718  | 7.158913280  | 1.328822169  |
| C85  | 1.458441863  | 4.869206013  | 1.233236564  |
| C86  | 1.771635843  | 9.066521621  | 2.191486018  |
| C87  | 1.329796958  | 10.475585026 | 1.836959907  |
| C88  | 0.207157747  | 11.884410224 | 0.196370126  |
| C89  | -1.054053557 | 12.566308343 | 0.783495932  |
| C90  | 0.175155655  | 11.915633357 | -1.334461489 |
| C91  | -1.008929241 | 11.183554718 | -1.955727984 |
| C92  | -3.172182817 | 12.275226896 | 1.978454147  |
| C93  | -3.060456214 | 13.365693797 | 3.036151513  |
| C94  | -4.015424055 | 11.087591864 | 2.521674688  |
| C95  | -4.259916380 | 10.031122711 | 1.467644680  |
| C96  | -5.369483071 | 10.121031869 | 0.612387381  |
| C97  | -3.360285182 | 8.968909875  | 1.273677541  |
| C98  | -5.562802103 | 9.200383642  | -0.420695920 |
| C99  | -3.519712608 | 8.057475858  | 0.225775863  |
| C100 | -4.619285958 | 8.192131793  | -0.617852379 |
| C101 | 4.406803618  | -4.311076662 | -8.576295556 |
| C102 | 2.985448287  | -3.921421353 | -8.208230362 |
| C103 | 1.596981889  | -2.261374178 | -6.982029118 |
| C104 | 1.274355098  | -0.879372756 | -7.558734905 |
| C105 | 1.848696216  | 1.509309684  | -7.465441143 |
| C106 | 3.112851347  | 2.362688222  | -7.507371689 |
| C107 | 5.423901915  | 2.733294306  | -6.850010693 |
| C108 | 6.067749804  | 2.999783263  | -8.196492570 |
| C109 | -2.246061488 | -3.237215637 | -9.367291207 |
| C110 | -3.187610061 | -2.049364750 | -9.134769792 |
| C111 | -1.987242473 | -3.960340568 | -8.025496843 |
| C112 | -1.388028305 | -5.362324432 | -8.246986062 |
| C113 | -0.875865834 | -5.924019162 | -6.940328851 |
| C114 | -3.429052312 | 0.297227985  | -8.496099820 |
| C115 | -2.775008105 | 1.538169221  | -9.068883199 |
| C116 | -3.920756537 | 0.436716788  | -7.035170911 |
| C117 | -2.808743811 | 0.263265553  | -6.034519938 |
| C118 | -1.935959751 | 1.321130989  | -5.723404698 |
| C119 | -2.564497831 | -1.000597511 | -5.471570849 |
| C120 | -0.819327066 | 1.099834674  | -4.909092831 |
| C121 | -1.449103478 | -1.220431528 | -4.656961194 |
| C122 | -0.562139387 | -0.173912344 | -4.389204177 |
| C123 | 7.588810209  | -6.953747241 | -4.058337332 |

|       |               |               |              |
|-------|---------------|---------------|--------------|
| C124  | 8.676866053   | -7.161403653  | -2.993380428 |
| C125  | 6.191994754   | -7.114765393  | -3.437424597 |
| C126  | 5.026827349   | -6.789335334  | -4.318820746 |
| C127  | 4.712833631   | -7.372657695  | -5.529242009 |
| C128  | 3.036469650   | -6.077290190  | -4.890373127 |
| C129  | 9.632733548   | -8.518986291  | -1.226677790 |
| C130  | 11.045456878  | -8.387928855  | -1.751057690 |
| C131  | -0.126249349  | -6.814266531  | -0.101585717 |
| C132  | 1.321706186   | -7.051681421  | 0.317120604  |
| C133  | 2.319304561   | -7.267735582  | -0.860672664 |
| C134  | 2.142462185   | -8.693684046  | -1.447992817 |
| C135  | 3.244671359   | -9.150716528  | -2.406711549 |
| C136  | 3.148075201   | -10.635839982 | -2.825938577 |
| C137  | 3.755348926   | -7.144747408  | -0.323629580 |
| C138  | 3.612311918   | -1.064759582  | -1.817463646 |
| Fe139 | 3.947590707   | -2.325375188  | -3.342474696 |
| Fe140 | 2.072903516   | 0.454534149   | -1.334930280 |
| Fe141 | 4.927662734   | 0.027594853   | -0.746531406 |
| Fe142 | 4.099619664   | 0.226220058   | -3.185579563 |
| Fe143 | 3.972904731   | 2.329676205   | -1.637376806 |
| Fe144 | 4.573159152   | -2.515453201  | -0.862874154 |
| Fe145 | 2.158351090   | -2.220616323  | -1.597079296 |
| H146  | -7.100774911  | -6.903207366  | -0.162735659 |
| H147  | -7.132779858  | -5.892910246  | -1.444376546 |
| H148  | -10.260541036 | -3.876130870  | 0.692147443  |
| H149  | -9.427055075  | -5.306938615  | -1.025236210 |
| H150  | -9.430067560  | -6.441902030  | 0.320367185  |
| H151  | -8.314639531  | -1.981880362  | 1.407187537  |
| H152  | -9.455222882  | -4.704511766  | 3.378959490  |
| H153  | -9.975019317  | -2.047361283  | 2.045358574  |
| H154  | -8.787311048  | -5.403317365  | 5.487188640  |
| H155  | -6.800228462  | -5.191529471  | 3.158676121  |
| H156  | -8.485852771  | -3.706941160  | 5.929958962  |
| H157  | -3.130047008  | -1.575761264  | 2.755564922  |
| H158  | -5.552991982  | -3.135435307  | 2.656175199  |
| H159  | -4.567531578  | -5.809363913  | 2.937133687  |
| H160  | -4.938118182  | 0.523065050   | 6.582470619  |
| H161  | -6.031000777  | -1.580676921  | 4.927464076  |
| H162  | -4.373026485  | -5.850207414  | 4.706462219  |
| H163  | -4.782533044  | -0.974924267  | 2.479440534  |
| H164  | -5.120293656  | -3.066207248  | 7.139028362  |
| H165  | -6.309343373  | -0.545031413  | 6.974345629  |
| H166  | -0.973547153  | -3.190889589  | 2.824393689  |
| H167  | -0.921331424  | -2.065313518  | 1.442990833  |
| H168  | 0.578105172   | -2.771418435  | 2.047236252  |
| H169  | -1.225205912  | -0.776379144  | 3.562043918  |
| H170  | -4.388738860  | -4.210921974  | 9.023743591  |
| H171  | -1.394854123  | 2.122712860   | 4.640219024  |
| H172  | -1.732063057  | -0.086954860  | 8.553238078  |
| H173  | -1.186001265  | 3.186524772   | 8.865161887  |
| H174  | 0.124801637   | 0.243015565   | 1.712343128  |
| H175  | 1.610302707   | -0.394881172  | 2.424106017  |
| H176  | 8.927162723   | 1.018166115   | 5.408363613  |
| H177  | -2.091419722  | 3.640700621   | 5.249329185  |
| H178  | -1.955663766  | 4.249799238   | 7.666165682  |
| H179  | -0.322456327  | 3.449905517   | 5.161541418  |
| H180  | -0.183908421  | 4.069792326   | 7.688893262  |
| H181  | -2.212950963  | 1.860615542   | 6.997521797  |
| H182  | 0.841274792   | 1.825024920   | 6.722479746  |
| H183  | -1.244526384  | -0.065119173  | 5.848554086  |
| H184  | 0.657351546   | 0.825882794   | 3.305322601  |
| H185  | 1.779381289   | 4.071769689   | 0.547769873  |
| H186  | 0.790638113   | 4.430011343   | 1.991127239  |
| H187  | 2.794014581   | 4.987440367   | 2.677447675  |
| H188  | 3.086991433   | 4.275174409   | 5.200308951  |
| H189  | 4.855287765   | 3.618398137   | 2.205665059  |
| H190  | 6.589915890   | 1.855304942   | 2.035611253  |
| H191  | 6.025000108   | 0.911265772   | 6.209046797  |
| H192  | -1.401433553  | -2.662692088  | 5.151131682  |
| H193  | -0.985066203  | -5.425999233  | 6.075323448  |
| H194  | -0.290741654  | -4.984609267  | 7.654777330  |
| H195  | -2.809451991  | -3.929283949  | 6.489427433  |
| H196  | -3.748297622  | -2.700213402  | 9.710009782  |
| H197  | 4.261815369   | 2.645558895   | 6.365438841  |
| H198  | 1.380148615   | -2.112664544  | 4.401280016  |
| H199  | -1.002890187  | 0.729095642   | 11.095546495 |
| H200  | -1.563794683  | -0.911875275  | 10.674510547 |
| H201  | 1.064316835   | -1.307343141  | 10.056136891 |
| H202  | 10.018987721  | -8.149828032  | 4.979871974  |
| H203  | -2.016113123  | -5.821456766  | -4.249326514 |
| H204  | 0.724576145   | -6.062899707  | -1.662556050 |
| H205  | -2.168116810  | -6.034928820  | -8.630109283 |

|      |               |              |               |
|------|---------------|--------------|---------------|
| H206 | -0.573647059  | -5.316840420 | -8.984553042  |
| H207 | -2.926823501  | -4.061297325 | -7.460580617  |
| H208 | -2.144862982  | 1.349811379  | -9.969495724  |
| H209 | -2.838550138  | -3.916753738 | -9.998554482  |
| H210 | -3.397607052  | -1.933856882 | -2.516995758  |
| H211 | -4.429258970  | -4.629032110 | -1.497936805  |
| H212 | -1.597131006  | -0.817874049 | -8.612905528  |
| H213 | -4.332559481  | 0.158850579  | -9.125306296  |
| H214 | -0.382340716  | -2.341234639 | -9.565671063  |
| H215 | -1.717695131  | -5.712011035 | -2.515984196  |
| H216 | -1.315584794  | -3.340631976 | -7.410729739  |
| H217 | -0.590952867  | -3.684395757 | -10.493565811 |
| H218 | -6.859663183  | -2.814236342 | -3.375584900  |
| H219 | -3.691568714  | -2.152189348 | -0.781237054  |
| H220 | 0.920565864   | -5.304027485 | -7.445970834  |
| H221 | -2.751542451  | -4.202895606 | -1.192537622  |
| H222 | -3.865998435  | 2.968165983  | 2.832267913   |
| H223 | -2.763841083  | 0.923397982  | 1.318513383   |
| H224 | -8.332944673  | 1.497345821  | 3.123074444   |
| H225 | -7.313573315  | 0.601367979  | 0.461355635   |
| H226 | -6.739008205  | 4.709842796  | 1.830716900   |
| H227 | -7.922546873  | 9.446097112  | 3.835226770   |
| H228 | -6.938587822  | 5.830544703  | 4.792494763   |
| H229 | -8.713272133  | 6.216780148  | 2.697888456   |
| H230 | -5.885188718  | 7.392672632  | 2.353837143   |
| H231 | -10.036751656 | 10.514145621 | 0.324070960   |
| H232 | -2.977767029  | 4.557344117  | 1.115724875   |
| H233 | -4.460269905  | 4.389800936  | 0.163850793   |
| H234 | -9.147289547  | 11.300808764 | 2.587114580   |
| H235 | -7.962401207  | 6.415191596  | 1.115578641   |
| H236 | -6.067423478  | 2.588864437  | 0.897090349   |
| H237 | -7.321464315  | 0.069980738  | 2.887621799   |
| H238 | -9.576582416  | 2.865197347  | -1.032847718  |
| H239 | -1.935781709  | 1.623280869  | -2.789932759  |
| H240 | -10.100836351 | 1.169706171  | -0.999075620  |
| H241 | 10.200375106  | 2.170715037  | 3.746632468   |
| H242 | 8.643582826   | 2.423715342  | 3.315611308   |
| H243 | 2.076087233   | 5.766365798  | -1.144008861  |
| H244 | -0.391091256  | 5.510235646  | 0.329179891   |
| H245 | 2.311591198   | 7.795656218  | 0.598252695   |
| H246 | -3.099266579  | 3.759946645  | -1.843112562  |
| H247 | -4.506461063  | 4.607357613  | -3.161137929  |
| H248 | -5.962963269  | 3.934729055  | -4.727337911  |
| H249 | -4.140931759  | 5.810522025  | -2.180531319  |
| H250 | -4.988458981  | 1.726481667  | -4.486431589  |
| H251 | -6.774420709  | 1.871919660  | -4.468045056  |
| H252 | 1.133348583   | 11.552982006 | -1.732720139  |
| H253 | 0.077365736   | 12.972625741 | -1.628571282  |
| H254 | 0.259896002   | 10.203989888 | -3.277601839  |
| H255 | -1.467039151  | 9.864823027  | -3.414573281  |
| H256 | -2.362129709  | 9.438501146  | -6.261163009  |
| H257 | -1.735318143  | 5.026441637  | -5.914215617  |
| H258 | -6.438432494  | 9.275594519  | -1.070931390  |
| H259 | -2.513659907  | 8.823009691  | 1.949911530   |
| H260 | -3.676357576  | 8.150965095  | -3.248337240  |
| H261 | 1.812359260   | 5.214434526  | -3.675409018  |
| H262 | 3.150558121   | 6.910258449  | -2.810650251  |
| H263 | -0.702794161  | 4.875527223  | -3.442343913  |
| H264 | -8.202252069  | 0.578559061  | -2.173462402  |
| H265 | 4.790300538   | 9.620422369  | -3.627715286  |
| H266 | -5.893847916  | -0.425484324 | -3.534803202  |
| H267 | 1.530818959   | 6.258800220  | -5.064137349  |
| H268 | -2.772337246  | 7.282284863  | 0.052396647   |
| H269 | 4.322116750   | 9.914295057  | -1.939896979  |
| H270 | -1.769938556  | 7.929712966  | -6.862780984  |
| H271 | -3.896088561  | 9.350246533  | -4.483119061  |
| H272 | -5.269822370  | -3.082149218 | -3.820527383  |
| H273 | -6.038640336  | -2.799200686 | -1.232371740  |
| H274 | -6.100134180  | 10.921073660 | 0.754357345   |
| H275 | -4.937734530  | 1.836503728  | -2.013362751  |
| H276 | 0.477855358   | 7.980576373  | -3.607288118  |
| H277 | -0.673720163  | 6.430160719  | -6.068257485  |
| H278 | 0.108673736   | 4.210724392  | -4.851116668  |
| H279 | -2.747714784  | 6.137040623  | -3.899628712  |
| H280 | 1.263452764   | 8.779416263  | 3.124166116   |
| H281 | 0.382906724   | 9.737581649  | 0.185457882   |
| H282 | 1.025378673   | 12.549439942 | 0.516194935   |
| H283 | 2.851405726   | 9.102650333  | 2.389767894   |
| H284 | -1.665725989  | 10.806881832 | 1.589937017   |
| H285 | 5.035689007   | -3.412468435 | -8.661941354  |
| H286 | 4.788911302   | -4.886834223 | -7.707183466  |
| H287 | 7.714239098   | -5.914669677 | -4.396979222  |

|       |              |               |              |
|-------|--------------|---------------|--------------|
| H288  | 5.336148866  | -5.497036162  | -9.947142787 |
| H289  | 3.739166610  | -5.811323339  | -9.775043445 |
| H290  | 5.814380167  | 4.247297546   | -0.235008836 |
| H291  | 6.325598348  | 6.897710505   | 1.145353773  |
| H292  | 5.720685953  | 7.578182417   | -3.010098067 |
| H293  | 4.497860969  | 5.272422917   | 0.431491471  |
| H294  | 7.505428365  | 7.347753598   | 0.102487494  |
| H295  | 6.168204793  | 2.216915620   | -6.223375928 |
| H296  | 6.582896691  | 6.095569637   | -1.667657983 |
| H297  | 4.127155008  | -7.377903530  | 5.310445133  |
| H298  | 6.010046226  | -8.487486937  | 3.159281324  |
| H299  | 4.274590033  | 0.978747526   | -6.463174833 |
| H300  | 4.536120085  | -0.403063378  | 3.812180143  |
| H301  | 3.766037454  | -4.652573949  | 0.936395756  |
| H302  | 1.422822730  | 1.492881044   | -8.476357933 |
| H303  | -1.262413566 | -2.212860766  | -4.239515597 |
| H304  | 1.128126628  | 2.054040427   | -6.831948382 |
| H305  | 3.468622237  | -4.818250681  | 4.843043766  |
| H306  | 2.557117539  | -0.086801574  | -6.185472913 |
| H307  | 3.264955759  | -5.249835989  | 3.148122569  |
| H308  | 3.777606653  | -7.591023560  | 3.580255572  |
| H309  | 5.692872644  | -5.960223584  | 3.070355657  |
| H310  | 5.820234608  | -5.631005384  | 4.807207077  |
| H311  | -4.696361244 | -0.324944769  | -6.872673953 |
| H312  | 4.535487838  | -9.879903640  | 5.364702735  |
| H313  | 3.618298940  | -12.264966037 | 3.672848034  |
| H314  | 0.312452492  | -0.343843319  | -3.762074610 |
| H315  | 4.713916758  | -12.213847861 | 6.375545992  |
| H316  | 3.173020477  | -12.454346446 | 5.877129200  |
| H317  | 5.044642969  | -3.591025636  | 2.601301537  |
| H318  | -0.128720436 | 1.915668967   | -4.680185742 |
| H319  | -3.248434416 | -1.828198495  | -5.675562365 |
| H320  | 6.706088837  | -10.654164737 | -1.021522225 |
| H321  | 6.068951371  | -8.160596364  | -3.105694746 |
| H322  | 5.728151392  | -8.803757006  | 0.449965212  |
| H323  | 5.875978927  | -11.143634911 | -2.238462314 |
| H324  | 5.789975406  | 2.283642342   | -9.007455433 |
| H325  | 5.877047694  | -5.651914466  | 0.239020092  |
| H326  | 1.357832557  | -7.893970170  | 1.018657765  |
| H327  | 3.702716209  | -2.283341022  | -7.217912784 |
| H328  | 2.109972672  | -9.382583213  | -0.589246837 |
| H329  | 2.914656111  | -7.195442270  | -6.675742332 |
| H330  | 2.061916457  | -5.606930152  | -4.899689296 |
| H331  | 5.162799764  | -12.941044982 | 4.197653158  |
| H332  | 4.936593156  | -1.345617375  | 2.391465954  |
| H333  | 7.661714583  | -6.617804499  | 1.455489809  |
| H334  | 6.914771943  | -4.506433896  | 0.402251614  |
| H335  | 8.013630533  | -7.711459185  | 3.528027008  |
| H336  | 3.260309328  | -3.098101516  | 5.688895186  |
| H337  | 3.207546673  | -8.547439531  | -3.325986198 |
| H338  | 4.233732871  | -8.988575876  | -1.955737141 |
| H339  | 1.161601006  | -8.747817606  | -1.944681376 |
| H340  | 1.650829170  | -2.224598352  | -5.882885104 |
| H341  | -2.118544160 | 2.310258154   | -6.152293503 |
| H342  | -4.391539697 | 1.428359053   | -6.947118570 |
| H343  | 1.613422970  | -6.145724401  | 0.874684072  |
| H344  | 7.648429941  | -8.163214856  | 1.282882688  |
| H345  | 6.318676940  | -9.949748030  | 1.308414060  |
| H346  | 3.209381435  | -1.413343857  | 5.468923746  |
| H347  | 5.262439445  | -8.081782664  | -6.136315892 |
| H348  | 6.135128961  | -6.502770012  | -2.529744697 |
| H349  | 0.802227720  | -2.949072267  | -7.279337720 |
| H350  | 5.195268896  | 3.696252712   | -6.368189159 |
| H351  | 7.265081579  | -0.641277782  | 4.708438142  |
| H352  | 7.512549609  | -0.243783112  | 2.994022369  |
| H353  | 8.708440851  | -7.650395094  | -5.628327465 |
| H354  | 7.777773404  | -8.808611716  | -4.943872788 |
| H355  | 9.515798317  | -9.547232694  | -0.853570850 |
| H356  | 7.903976890  | -9.014483736  | -2.372163361 |
| H357  | 11.171417187 | -8.631542004  | -2.833746563 |
| H358  | 9.490931183  | -7.837344911  | -0.372340987 |
| H359  | 10.151701680 | -0.777591567  | 3.210611943  |
| H360  | -2.076106771 | 13.419747773  | 3.557622665  |
| H361  | 8.963431424  | -7.837926537  | 6.382528802  |
| H362  | 8.703380990  | -5.374441510  | 5.196122047  |
| H363  | -3.691960014 | 12.712463899  | 1.108897060  |
| H364  | -3.502794043 | 10.650596788  | 3.392588429  |
| H365  | -4.969352786 | 11.505305561  | 2.874214233  |
| H366  | -5.652287890 | 7.372806818   | -2.052384559 |
| H367  | -1.679115491 | 0.017472889   | -0.843458885 |
| Mo368 | 3.482600240  | -4.660752807  | -2.043322109 |
| N369  | -7.718285855 | -6.511485689  | -0.878299598 |

|      |              |               |               |
|------|--------------|---------------|---------------|
| N370 | -9.345507335 | -3.806551962  | 1.131384479   |
| N371 | -8.830923298 | -4.079652579  | 3.883532648   |
| N372 | -6.230623474 | -5.153597046  | 4.006005430   |
| N373 | -4.681848049 | -2.938275219  | 3.144253012   |
| N374 | -5.197928811 | -1.137855001  | 5.321575615   |
| N375 | -4.471227382 | -2.564963104  | 7.752385829   |
| N376 | -2.085575438 | -4.046247583  | 7.199403554   |
| N377 | -0.395605578 | -2.641667570  | 5.326357641   |
| N378 | -0.294146767 | 0.199265002   | 6.120354595   |
| N379 | -0.867776787 | 0.157619464   | 9.042989218   |
| N380 | 4.008462341  | -11.892508356 | 5.709341177   |
| N381 | 5.049479739  | -9.743010554  | 4.487733691   |
| N382 | 4.525629216  | -3.608138102  | 3.480680315   |
| N383 | 0.876868448  | 1.737615688   | -0.797663730  |
| N384 | 0.181326128  | 2.563178014   | -0.478948549  |
| N385 | 3.723416674  | -2.291826543  | 5.266204862   |
| N386 | 4.505732462  | -1.297783074  | 3.329958211   |
| N387 | 7.970694767  | -7.819318573  | 4.565258240   |
| N388 | -5.917010590 | -2.420653191  | -3.352746474  |
| N389 | -2.263395042 | -5.426029731  | -3.335550271  |
| N390 | -5.905369983 | 0.093520574   | -2.639955299  |
| N391 | -8.146260007 | 1.445445337   | -1.643388603  |
| N392 | -7.914706569 | 1.085123152   | 1.137660101   |
| N393 | -5.668957155 | 2.613193790   | 1.840063520   |
| N394 | -2.875544926 | 2.890537135   | -1.292693042  |
| N395 | -2.228357183 | 0.895100013   | -0.775584855  |
| N396 | -6.133808253 | 5.296309078   | 2.399666577   |
| N397 | -9.167477523 | 8.614587364   | 0.858404304   |
| N398 | -9.036070587 | 10.357088562  | 2.225680856   |
| N399 | 9.363765267  | 1.699927554   | 3.392963213   |
| N400 | 6.878409879  | 6.575352457   | 0.344753249   |
| N401 | 5.094339182  | 8.010282614   | -2.335395646  |
| N402 | 2.443087280  | 7.621293593   | -3.024254095  |
| N403 | -2.220046460 | 6.618181627   | -4.650543982  |
| N404 | -2.113198734 | 8.471566706   | -6.077027412  |
| N405 | -3.344752850 | 8.578040228   | -4.117104133  |
| N406 | 1.173867258  | 6.199998110   | -0.877738168  |
| N407 | 1.508422932  | 8.067911790   | 1.171715093   |
| N408 | 0.510394478  | 10.578878626  | 0.746550647   |
| N409 | -0.714468125 | 10.457234751  | -3.067833791  |
| N410 | -1.852016126 | 11.8066605518 | 1.576561226   |
| N411 | 4.422226592  | -5.050887933  | -9.840123143  |
| N412 | 2.854808188  | -2.772187143  | -7.511621485  |
| N413 | 1.985533848  | 0.134671837   | -7.015520013  |
| N414 | 4.248057553  | 1.884827524   | -6.939843254  |
| N415 | -1.063172321 | -2.848273031  | -10.143513585 |
| N416 | -2.609471293 | -0.872094213  | -8.758954657  |
| N417 | 7.780190946  | -7.825402560  | -5.232373246  |
| N418 | 3.963701797  | -5.966222593  | -3.938538215  |
| N419 | 3.461231814  | -6.911202334  | -5.867003954  |
| N420 | 8.640196983  | -8.312126081  | -2.267353629  |
| O421 | -7.184057110 | -4.521228389  | 1.133721650   |
| O422 | -7.712203124 | -2.093774823  | 3.856522757   |
| O423 | -6.106550490 | -4.527315401  | 6.197332819   |
| O424 | -3.005987432 | -3.736711201  | 4.461264415   |
| O425 | -3.120575012 | -0.292697961  | 4.918766137   |
| O426 | -3.677239318 | -0.544174457  | 8.465690782   |
| O427 | -1.555297565 | -3.924432191  | 9.431530877   |
| O428 | 1.380517624  | -3.767122225  | 6.248685820   |
| O429 | 1.940534477  | -0.138089741  | 5.801248732   |
| O430 | 1.063232532  | 1.347634203   | 9.128437709   |
| O431 | 0.986052819  | -0.676568830  | 11.996163075  |
| O432 | 5.835943774  | -10.967623625 | 2.688893399   |
| O433 | 6.660134977  | -8.318856099  | 6.387086353   |
| O434 | 10.690421844 | -5.686381249  | 5.529822407   |
| O435 | -5.707144870 | -0.323802588  | -0.393445059  |
| O436 | -3.863785953 | -4.120796366  | -4.287636935  |
| O437 | -6.778703381 | 3.144270332   | -0.965949147  |
| O438 | -5.742323572 | 3.579450807   | -3.847767084  |
| O439 | -9.734727643 | 2.443803330   | 1.471379909   |
| O440 | -5.847675553 | 1.972188780   | 4.025702321   |
| O441 | -4.144381857 | 5.427604169   | 3.514859513   |
| O442 | -6.411035555 | 7.800672088   | 4.881014939   |
| O443 | 10.244613117 | -1.165302215  | 5.213057895   |
| O444 | 3.472191632  | 4.209421229   | 4.307683831   |
| O445 | 4.314945931  | 8.000499879   | -0.191377576  |
| O446 | 2.112789733  | 9.868684922   | -3.376126340  |
| O447 | -0.764276376 | 7.188293558   | -1.585527689  |
| O448 | -0.411523004 | 7.280731324   | 2.151956038   |
| O449 | 2.592385215  | 5.480129865   | 1.854835897   |
| O450 | 1.685743792  | 11.445174417  | 2.516481753   |
| O451 | -1.271121028 | 13.767175247  | 0.567417165   |

|  |                        |              |                             |               |              |
|--|------------------------|--------------|-----------------------------|---------------|--------------|
|  | O452                   | -2.160697215 | 11.299793096                | -1.511950893  |              |
|  | O453                   | -3.985390798 | 14.108463297                | 3.325297477   |              |
|  | O454                   | -4.740078308 | 7.306160108                 | -1.709316932  |              |
|  | O455                   | 2.022366287  | -4.664949498                | -8.513373954  |              |
|  | O456                   | 0.444024782  | -0.724746495                | -8.477249484  |              |
|  | O457                   | 3.058901470  | 3.488620160                 | -8.028819643  |              |
|  | O458                   | 6.862772811  | 3.905845435                 | -8.385970754  |              |
|  | O459                   | -4.416764328 | -2.167745798                | -9.260017418  |              |
|  | O460                   | -1.596554705 | -6.463525824                | -6.106862685  |              |
|  | O461                   | 0.437390104  | -5.754104166                | -6.685791565  |              |
|  | O462                   | -2.940224051 | 2.671217488                 | -8.638301233  |              |
|  | O463                   | 9.595870203  | -6.336177134                | -2.826673460  |              |
|  | O464                   | 12.005809342 | -8.116446172                | -1.044418560  |              |
|  | O465                   | -0.279431185 | -6.162094368                | -1.261141005  |              |
|  | O466                   | -1.080980580 | -7.139755594                | 0.600097768   |              |
|  | O467                   | 4.244999712  | -11.293911265               | -2.891422597  |              |
|  | O468                   | 2.001957270  | -11.087086844               | -3.106399332  |              |
|  | O469                   | 4.488346356  | -6.198344502                | -0.851354771  |              |
|  | O470                   | 4.172620801  | -7.921308426                | 0.555485354   |              |
|  | O471                   | 2.083990870  | -6.247017376                | -1.836846214  |              |
|  | O472                   | 8.137011225  | -7.433543673                | 1.753780615   |              |
|  | O473                   | 6.515910776  | -5.254367868                | 0.886088884   |              |
|  | O474                   | -3.747218400 | 5.106324225                 | -2.754234572  |              |
|  | O475                   | 6.807329216  | -11.150690878               | -1.864943782  |              |
|  | O476                   | 6.545203343  | -9.360076602                | 0.544307616   |              |
|  | S477                   | 4.019864557  | 4.595989123                 | -1.852731336  |              |
|  | S478                   | 2.444118617  | 1.686337696                 | -3.213940782  |              |
|  | S479                   | 1.979976376  | -3.383010289                | -3.410762793  |              |
|  | S480                   | 3.479215752  | -1.391394965                | 0.310625817   |              |
|  | S481                   | 0.434632928  | -1.099814118                | -1.103029266  |              |
|  | S482                   | 4.430633463  | -0.973002400                | -5.006324619  |              |
|  | S483                   | 3.001399638  | -3.759522289                | 0.205959343   |              |
|  | S484                   | 5.902963456  | 1.300962017                 | -2.287769941  |              |
|  | S485                   | 5.568316960  | -3.624493087                | -2.516810101  |              |
|  | S486                   | 6.034118002  | -1.487289819                | 0.415158015   |              |
|  | end                    |              |                             |               |              |
|  | <b>rest-3b5</b>        |              | <b>bm522n2x3b5dtd.car_4</b> |               |              |
|  | <b>2N2 dissociated</b> |              |                             |               |              |
|  | <b>35, S=1/2</b>       |              |                             |               |              |
|  | <b>Fe(139) -2.197</b>  | C1           | -8.343983227                | -4.640884878  | 0.719941210  |
|  | <b>Fe(140) -2.422</b>  | C2           | -8.772623650                | -5.752341980  | -0.243058569 |
|  | <b>Fe(141) -2.606</b>  | C3           | -9.051419243                | -2.622894020  | 1.924578898  |
|  | <b>Fe(142) 2.804</b>   | C4           | -8.475014712                | -2.911699997  | 3.308830087  |
|  | <b>Fe(143) 2.920</b>   | C5           | -8.290181872                | -4.478889407  | 5.175701228  |
|  | <b>Fe(144) 2.236</b>   | C6           | -6.778231310                | -4.718231283  | 5.170232468  |
|  | <b>Fe(145) -0.072</b>  | C7           | -4.790456787                | -5.283455025  | 3.869832621  |
|  |                        | C8           | -4.076540702                | -3.930614359  | 3.848543378  |
|  |                        | C9           | -4.152637335                | -1.595632479  | 3.137620881  |
|  |                        | C10          | -4.105495625                | -0.955649940  | 4.535074728  |
|  |                        | C11          | -5.262078806                | -0.530446381  | 6.628681206  |
|  |                        | C12          | -4.387000720                | -1.217721561  | 7.685235533  |
|  |                        | C13          | -3.795372789                | -3.318410091  | 8.795375454  |
|  |                        | C14          | -2.360797268                | -3.775999557  | 8.497244539  |
|  |                        | C15          | -0.810377141                | -4.593076893  | 6.765611457  |
|  |                        | C16          | 0.156049902                 | -3.611733614  | 6.093114009  |
|  |                        | C17          | 0.423814353                 | -1.644984504  | 4.618827875  |
|  |                        | C18          | 0.755428480                 | -0.465854601  | 5.562197253  |
|  |                        | C19          | -0.221719137                | -1.190295075  | 3.293050658  |
|  |                        | C20          | 0.600162145                 | -0.067491109  | 2.652095134  |
|  |                        | C21          | -0.383190634                | -2.385057246  | 2.346235870  |
|  |                        | C22          | -0.116019636                | 1.349407210   | 6.988907777  |
|  |                        | C23          | 0.082040761                 | 0.939753611   | 8.463658576  |
|  |                        | C24          | -1.260882956                | 2.376133559   | 6.805198339  |
|  |                        | C25          | -1.138271642                | 3.526214447   | 7.811540927  |
|  |                        | C26          | -1.274928681                | 2.917708714   | 5.369808355  |
|  |                        | C27          | -0.794977688                | -0.156802712  | 10.447681544 |
|  |                        | C28          | 0.538998967                 | -0.757021596  | 10.843247782 |
|  |                        | C29          | 4.477199766                 | -12.087991440 | 4.334030440  |
|  |                        | C30          | 5.200278827                 | -10.869646593 | 3.762255405  |
|  |                        | C31          | 5.645262743                 | -8.452309640  | 4.195024297  |
|  |                        | C32          | 6.818771682                 | -8.199590856  | 5.161336746  |
|  |                        | C33          | 4.583471204                 | -7.346137585  | 4.314151264  |
|  |                        | C34          | 5.140879172                 | -5.950296099  | 4.029137009  |
|  |                        | C35          | 4.025963387                 | -4.912240627  | 3.926323400  |
|  |                        | C36          | 4.259083735                 | -2.409013577  | 4.062526804  |
|  |                        | C37          | 9.174960098                 | -7.548275729  | 5.332844366  |
|  |                        | C38          | 9.553910795                 | -6.083706471  | 5.341565656  |
|  |                        | C39          | -5.472382376                | -2.193309598  | -1.979567915 |
|  |                        | C40          | -5.717909066                | -0.724212159  | -1.586638558 |
|  |                        | C41          | -3.971997643                | -2.510101340  | -1.789235306 |
|  |                        | C42          | -3.594667531                | -4.003499540  | -1.873152883 |
|  |                        | C43          | -3.247353541                | -4.514847036  | -3.271303873 |
|  |                        | C44          | -5.885467867                | 1.539296655   | -2.546196309 |

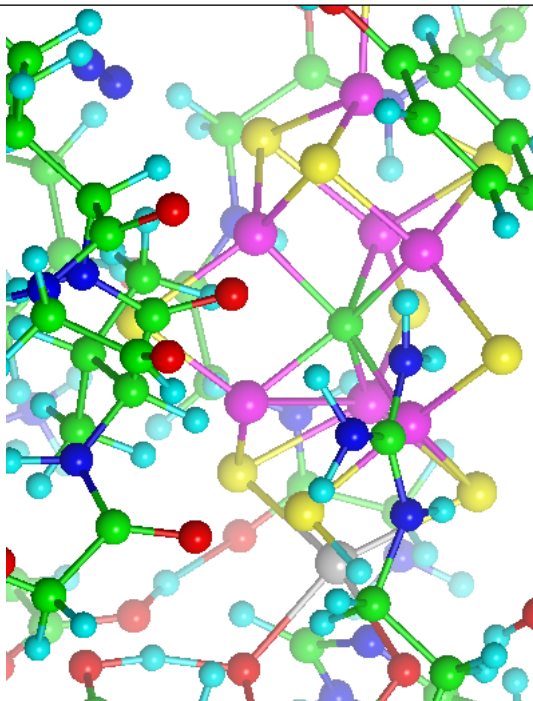

|      |              |              |              |
|------|--------------|--------------|--------------|
| C45  | -6.992872423 | 2.120134283  | -1.657206627 |
| C46  | -5.880542833 | 2.142178661  | -3.957069471 |
| C47  | -9.269127054 | 1.848046218  | -0.793202793 |
| C48  | -8.988203890 | 1.823772449  | 0.713888803  |
| C49  | -7.507989793 | 1.085329638  | 2.523412144  |
| C50  | -6.276318433 | 1.923351657  | 2.859914263  |
| C51  | -4.531461188 | 3.459319591  | 2.099563410  |
| C52  | -4.906570999 | 4.808205662  | 2.759949717  |
| C53  | -3.781858100 | 3.813746324  | 0.807224101  |
| C54  | -3.210780138 | 2.676509995  | 0.026865748  |
| C55  | -2.777713437 | 1.414511824  | 0.357621552  |
| C56  | -2.346881972 | 1.724768512  | -1.800392077 |
| C57  | -6.564604274 | 6.637005693  | 2.749084118  |
| C58  | -6.611262523 | 6.771181537  | 4.269914696  |
| C59  | -7.972089615 | 6.832565346  | 2.140082273  |
| C60  | -8.461932274 | 8.244659625  | 2.007978844  |
| C61  | -8.374084775 | 9.321069720  | 2.869508432  |
| C62  | -9.482824909 | 9.888584525  | 1.036177720  |
| C63  | 8.934630738  | 0.684500347  | 4.335272930  |
| C64  | 9.862057709  | -0.511600493 | 4.235995954  |
| C65  | 7.509147255  | 0.179285397  | 3.995423073  |
| C66  | 6.458709481  | 1.259006426  | 4.105689720  |
| C67  | 5.793981628  | 1.500915590  | 5.321468401  |
| C68  | 6.106083019  | 2.043514717  | 2.994403095  |
| C69  | 4.800230535  | 2.479059541  | 5.426459353  |
| C70  | 5.125753850  | 3.031827476  | 3.086792846  |
| C71  | 4.466958584  | 3.241460568  | 4.301884468  |
| C72  | 5.966202442  | 6.299485256  | -0.786305958 |
| C73  | 5.056628965  | 7.508461959  | -1.068816761 |
| C74  | 5.114245675  | 5.077456082  | -0.457974633 |
| C75  | 4.321155613  | 9.164308846  | -2.748207470 |
| C76  | 2.850199586  | 8.900723696  | -3.082824366 |
| C77  | 1.066289058  | 7.156198851  | -3.160331657 |
| C78  | 0.424558873  | 6.847351806  | -1.781090008 |
| C79  | 1.089849358  | 5.921527326  | -4.095196708 |
| C80  | -0.205887615 | 5.148665804  | -4.371777782 |
| C81  | -1.212024076 | 5.798337881  | -5.334311171 |
| C82  | -2.582922860 | 7.849642731  | -4.962789348 |
| C83  | 0.687428387  | 5.944082350  | 0.483410039  |
| C84  | 0.556649223  | 7.198560789  | 1.362413206  |
| C85  | 1.542952278  | 4.926635697  | 1.268362565  |
| C86  | 1.807980993  | 9.113673743  | 2.221710557  |
| C87  | 1.344021642  | 10.508129435 | 1.849444591  |
| C88  | 0.214660240  | 11.873874466 | 0.184675975  |
| C89  | -1.047776160 | 12.553496844 | 0.772216884  |
| C90  | 0.178373094  | 11.897905662 | -1.346175161 |
| C91  | -1.008503015 | 11.170811463 | -1.965956746 |
| C92  | -3.163681441 | 12.264083105 | 1.971408933  |
| C93  | -3.048969356 | 13.350533403 | 3.032387191  |
| C94  | -4.011417257 | 11.077887148 | 2.512198455  |
| C95  | -4.254048955 | 10.020356846 | 1.459745831  |
| C96  | -5.363142160 | 10.106324664 | 0.603749749  |
| C97  | -3.352517147 | 8.959198705  | 1.269246456  |
| C98  | -5.554736772 | 9.181954768  | -0.426493325 |
| C99  | -3.510370449 | 8.044148435  | 0.224223542  |
| C100 | -4.610136960 | 8.173936023  | -0.619977986 |
| C101 | 4.405219789  | -4.318281769 | -8.592468423 |
| C102 | 2.987359009  | -3.925550375 | -8.217696783 |
| C103 | 1.608022262  | -2.266388746 | -6.981468932 |
| C104 | 1.287251597  | -0.882926721 | -7.554772318 |
| C105 | 1.853421659  | 1.507097753  | -7.452452577 |
| C106 | 3.117189394  | 2.359982083  | -7.501960580 |
| C107 | 5.433273680  | 2.724525141  | -6.860825060 |
| C108 | 6.059218388  | 3.011079466  | -8.212714366 |
| C109 | -2.241857320 | -3.238953737 | -9.382403266 |
| C110 | -3.180233501 | -2.047328546 | -9.153116584 |
| C111 | -1.988197287 | -3.958875156 | -8.037701073 |
| C112 | -1.389630380 | -5.361448956 | -8.253558744 |
| C113 | -0.878983700 | -5.919497237 | -6.944531029 |
| C114 | -3.416668248 | 0.300440053  | -8.513996863 |
| C115 | -2.757891589 | 1.540625659  | -9.081633642 |
| C116 | -3.913887781 | 0.436691887  | -7.054753516 |
| C117 | -2.808483983 | 0.258356820  | -6.047066158 |
| C118 | -1.933823919 | 1.313489007  | -5.731061685 |
| C119 | -2.572933000 | -1.005233407 | -5.480513373 |
| C120 | -0.827100612 | 1.090698688  | -4.904138519 |
| C121 | -1.466869393 | -1.226517676 | -4.653073221 |
| C122 | -0.580528303 | -0.181785353 | -4.375353392 |
| C123 | 7.584844399  | -6.965262462 | -4.057923001 |
| C124 | 8.675228940  | -7.172029361 | -2.993330696 |
| C125 | 6.189703355  | -7.105486264 | -3.429686281 |
| C126 | 5.025588589  | -6.783657964 | -4.313219427 |



|      |               |               |              |
|------|---------------|---------------|--------------|
| C127 | 4.713993467   | -7.367370662  | -5.524071004 |
| C128 | 3.031381206   | -6.080457699  | -4.884021516 |
| C129 | 9.634589152   | -8.531941545  | -1.230082426 |
| C130 | 11.046966396  | -8.396919731  | -1.755445206 |
| C131 | -0.126702853  | -6.814293189  | -0.090701520 |
| C132 | 1.320757539   | -7.054575779  | 0.324656672  |
| C133 | 2.317519614   | -7.269306946  | -0.855021201 |
| C134 | 2.139416342   | -8.693300733  | -1.445703146 |
| C135 | 3.241978952   | -9.150565647  | -2.404305830 |
| C136 | 3.146180028   | -10.635269284 | -2.825782794 |
| C137 | 3.752605156   | -7.149937589  | -0.316574419 |
| C138 | 3.617943583   | -1.075484544  | -1.831103021 |
| Fe13 | 3.964811773   | -2.338381889  | -3.355605150 |
| Fe14 | 2.277659452   | 0.315927056   | -1.374305181 |
| Fe14 | 4.765543746   | 0.110863084   | -0.683696660 |
| Fe14 | 4.143978123   | 0.222951120   | -3.268907852 |
| Fe14 | 3.872010640   | 2.388558399   | -1.613742392 |
| Fe14 | 4.573946976   | -2.497471300  | -0.858687187 |
| Fe14 | 2.138449954   | -2.223034042  | -1.621574960 |
| H146 | -7.083120270  | -6.894600862  | -0.155708917 |
| H147 | -7.120556545  | -5.886111846  | -1.439036779 |
| H148 | -10.257523618 | -3.881866686  | 0.693351044  |
| H149 | -9.418072742  | -5.311353290  | -1.019993633 |
| H150 | -9.414438179  | -6.444466341  | 0.328107325  |
| H151 | -8.320776469  | -1.978677109  | 1.413313640  |
| H152 | -9.456279380  | -4.707380902  | 3.382596655  |
| H153 | -9.981863112  | -2.052756504  | 2.049378747  |
| H154 | -8.789642727  | -5.404293112  | 5.491733323  |
| H155 | -6.803756167  | -5.196227118  | 3.161301154  |
| H156 | -8.484948443  | -3.708139150  | 5.932985946  |
| H157 | -3.127188779  | -1.591131308  | 2.748711863  |
| H158 | -5.552737533  | -3.147796124  | 2.649608817  |
| H159 | -4.576690221  | -5.815750618  | 2.933221265  |
| H160 | -4.935187657  | 0.515340080   | 6.572138117  |
| H161 | -6.029219060  | -1.589665568  | 4.919453098  |
| H162 | -4.375673677  | -5.861563999  | 4.704215312  |
| H163 | -4.778354513  | -0.987803036  | 2.469405955  |
| H164 | -5.121575573  | -3.073500664  | 7.133999627  |
| H165 | -6.307962574  | -0.550681553  | 6.964061100  |
| H166 | -0.960918700  | -3.198999159  | 2.806784978  |
| H167 | -0.894207245  | -2.076772140  | 1.422192570  |
| H168 | 0.597741702   | -2.781198719  | 2.041936354  |
| H169 | -1.218482794  | -0.785900468  | 3.541124921  |
| H170 | -4.388913922  | -4.217138228  | 9.018434079  |
| H171 | -1.405575710  | 2.115640669   | 4.630133006  |
| H172 | -1.732239633  | -0.095127961  | 8.539396676  |
| H173 | -1.183231721  | 3.180642322   | 8.854274605  |
| H174 | 0.148655623   | 0.239390025   | 1.698984903  |
| H175 | 1.623333525   | -0.397871898  | 2.422212579  |
| H176 | 8.934728377   | 1.018318451   | 5.391376053  |
| H177 | -2.099696354  | 3.634316350   | 5.240314689  |
| H178 | -1.958493125  | 4.242884212   | 7.657762337  |
| H179 | -0.331319942  | 3.442188021   | 5.147727221  |
| H180 | -0.186613492  | 4.063954380   | 7.673452421  |
| H181 | -2.217228743  | 1.853853260   | 6.989313385  |
| H182 | 0.836533275   | 1.819946746   | 6.706695049  |
| H183 | -1.248384159  | -0.071021367  | 5.832400798  |
| H184 | 0.663106566   | 0.819734538   | 3.299791498  |
| H185 | 1.895264920   | 4.142374835   | 0.584369996  |
| H186 | 0.884243156   | 4.464703999   | 2.019893212  |
| H187 | 2.852229385   | 5.057472590   | 2.728012174  |
| H188 | 3.102073499   | 4.275085624   | 5.223309605  |
| H189 | 4.847281864   | 3.621703403   | 2.213790644  |
| H190 | 6.585086294   | 1.862484525   | 2.029791933  |
| H191 | 6.040670643   | 0.901710197   | 6.201399662  |
| H192 | -1.397611569  | -2.676092982  | 5.124236430  |
| H193 | -0.984267571  | -5.424259123  | 6.064323825  |
| H194 | -0.290806364  | -4.987956816  | 7.645945624  |
| H195 | -2.809315769  | -3.930223173  | 6.483272961  |
| H196 | -3.749007181  | -2.705897587  | 9.704182597  |
| H197 | 4.275979120   | 2.633432960   | 6.372978247  |
| H198 | 1.387350089   | -2.117153821  | 4.392538781  |
| H199 | -0.992216554  | 0.723282179   | 11.079166427 |
| H200 | -1.564633982  | -0.913320174  | 10.661907535 |
| H201 | 1.056415220   | -1.330927979  | 10.038816220 |
| H202 | 10.027020465  | -8.147098068  | 4.976597205  |
| H203 | -2.013671430  | -5.827090670  | -4.247812299 |
| H204 | 0.718902231   | -6.061564726  | -1.652692652 |
| H205 | -2.169517511  | -6.034986160  | -8.635913648 |
| H206 | -0.573689068  | -5.319366780  | -8.989942214 |
| H207 | -2.929133699  | -4.057712951  | -7.475298073 |
| H208 | -2.125349275  | 1.353242120   | -9.980282355 |

|      |               |              |               |
|------|---------------|--------------|---------------|
| H209 | -2.833258574  | -3.918155734 | -10.014473257 |
| H210 | -3.391744898  | -1.933946570 | -2.528386514  |
| H211 | -4.430069876  | -4.622683307 | -1.503269500  |
| H212 | -1.587306987  | -0.819116719 | -8.628470671  |
| H213 | -4.318859704  | 0.166117370  | -9.146664994  |
| H214 | -0.374383575  | -2.347770235 | -9.573201009  |
| H215 | -1.719601935  | -5.714162032 | -2.512936161  |
| H216 | -1.318068365  | -3.338780958 | -7.421928030  |
| H217 | -0.582880358  | -3.689461008 | -10.502242116 |
| H218 | -6.853745090  | -2.823351221 | -3.380076712  |
| H219 | -3.686061202  | -2.145281385 | -0.792479785  |
| H220 | 0.918057174   | -5.298890435 | -7.448970089  |
| H221 | -2.751927110  | -4.201370429 | -1.195688754  |
| H222 | -3.872459525  | 2.949344235  | 2.816321887   |
| H223 | -2.766133907  | 0.899269036  | 1.310226562   |
| H224 | -8.339014507  | 1.483340275  | 3.122270692   |
| H225 | -7.325149395  | 0.601145935  | 0.453731186   |
| H226 | -6.740291531  | 4.701733829  | 1.848438602   |
| H227 | -7.903914862  | 9.449710282  | 3.838339256   |
| H228 | -6.919436291  | 5.834663778  | 4.794665842   |
| H229 | -8.694903622  | 6.218605129  | 2.707185449   |
| H230 | -5.865481021  | 7.388241966  | 2.349729672   |
| H231 | -10.034166966 | 10.509458806 | 0.334774469   |
| H232 | -2.964200403  | 4.499289302  | 1.085612354   |
| H233 | -4.463584421  | 4.376061210  | 0.151167954   |
| H234 | -9.138573361  | 11.299844222 | 2.593433801   |
| H235 | -7.951313853  | 6.414407980  | 1.121407495   |
| H236 | -6.083392131  | 2.582812234  | 0.893312170   |
| H237 | -7.325351473  | 0.060278192  | 2.878447591   |
| H238 | -9.582968071  | 2.873833881  | -1.029857392  |
| H239 | -1.984315462  | 1.559020889  | -2.813061987  |
| H240 | -10.118329621 | 1.181950967  | -0.993428144  |
| H241 | 10.208231919  | 2.170255639  | 3.729698889   |
| H242 | 8.651307439   | 2.429087515  | 3.304508132   |
| H243 | 2.115697743   | 5.810609678  | -1.124144932  |
| H244 | -0.329771798  | 5.542587717  | 0.382983001   |
| H245 | 2.364244980   | 7.841641314  | 0.630958573   |
| H246 | -3.154832547  | 3.704876143  | -1.872151193  |
| H247 | -4.518348816  | 4.594735513  | -3.176648292  |
| H248 | -5.977128519  | 3.932052454  | -4.749105314  |
| H249 | -4.140492072  | 5.783715686  | -2.184729576  |
| H250 | -5.028495533  | 1.716815100  | -4.512703340  |
| H251 | -6.813064831  | 1.877715225  | -4.478393617  |
| H252 | 1.135593556   | 11.533493692 | -1.745510362  |
| H253 | 0.083291933   | 12.955532901 | -1.640528587  |
| H254 | 0.256792299   | 10.197152200 | -3.293841148  |
| H255 | -1.471489440  | 9.862816647  | -3.432051356  |
| H256 | -2.373931198  | 9.424483558  | -6.258683141  |
| H257 | -1.733487963  | 5.018795683  | -5.910667894  |
| H258 | -6.430445453  | 9.254354776  | -1.077249464  |
| H259 | -2.506019272  | 8.816915206  | 1.946803027   |
| H260 | -3.676796451  | 8.140480132  | -3.240704819  |
| H261 | 1.808376643   | 5.204982357  | -3.666509808  |
| H262 | 3.152575433   | 6.902706298  | -2.808375690  |
| H263 | -0.710432720  | 4.870219654  | -3.433297284  |
| H264 | -8.226423089  | 0.579528745  | -2.176211751  |
| H265 | 4.791389622   | 9.621921763  | -3.628561925  |
| H266 | -5.913619291  | -0.430600966 | -3.548093644  |
| H267 | 1.524566700   | 6.251520750  | -5.053341813  |
| H268 | -2.761269673  | 7.270227438  | 0.052103226   |
| H269 | 4.320674543   | 9.911234776  | -1.941155708  |
| H270 | -1.786186027  | 7.914724355  | -6.861878118  |
| H271 | -3.898706924  | 9.339400127  | -4.474866332  |
| H272 | -5.263030008  | -3.083086705 | -3.828210333  |
| H273 | -6.031848154  | -2.796148068 | -1.239963023  |
| H274 | -6.094655693  | 10.906132518 | 0.743247593   |
| H275 | -4.960118751  | 1.838322619  | -2.038464366  |
| H276 | 0.475064814   | 7.971411371  | -3.591020717  |
| H277 | -0.673244386  | 6.423899146  | -6.057894843  |
| H278 | 0.105050004   | 4.201829943  | -4.837965505  |
| H279 | -2.753089908  | 6.122431650  | -3.896777966  |
| H280 | 1.300883099   | 8.824490852  | 3.154029846   |
| H281 | 0.423028830   | 9.730593168  | 0.199156886   |
| H282 | 1.026348525   | 12.550644522 | 0.496267970   |
| H283 | 2.885830772   | 9.166794303  | 2.420820368   |
| H284 | -1.657835853  | 10.793880124 | 1.581879781   |
| H285 | 5.037523184   | -3.422170294 | -8.675030396  |
| H286 | 4.786761022   | -4.900320297 | -7.727970041  |
| H287 | 7.719072547   | -5.930885490 | -4.407885587  |
| H288 | 5.329122157   | -5.495910607 | -9.973655778  |
| H289 | 3.733602159   | -5.814939095 | -9.793452728  |
| H290 | 5.785941316   | 4.231502917  | -0.264363143  |

|      |              |               |              |
|------|--------------|---------------|--------------|
| H291 | 6.331692934  | 6.890072412   | 1.137565147  |
| H292 | 5.713354300  | 7.568706114   | -3.017909725 |
| H293 | 4.501311850  | 5.276144362   | 0.432268939  |
| H294 | 7.510556178  | 7.331561012   | 0.090451485  |
| H295 | 6.185776181  | 2.200701468   | -6.250944380 |
| H296 | 6.579828039  | 6.084150598   | -1.674800822 |
| H297 | 4.141255709  | -7.380912441  | 5.323664246  |
| H298 | 6.011912039  | -8.490397799  | 3.162172622  |
| H299 | 4.286278619  | 0.967609491   | -6.477473948 |
| H300 | 4.534953513  | -0.395164879  | 3.840182714  |
| H301 | 3.815446193  | -4.609274351  | 0.937546389  |
| H302 | 1.422770383  | 1.489147956   | -8.461621818 |
| H303 | -1.287208906 | -2.219752943  | -4.234843646 |
| H304 | 1.136038330  | 2.052171646   | -6.815657284 |
| H305 | 3.500474197  | -4.816388385  | 4.883632070  |
| H306 | 2.555025579  | -0.084496457  | -6.168777726 |
| H307 | 3.271980122  | -5.239116745  | 3.189057040  |
| H308 | 3.784688509  | -7.585502044  | 3.593893888  |
| H309 | 5.699133227  | -5.959217165  | 3.080803868  |
| H310 | 5.843474604  | -5.639847044  | 4.818288948  |
| H311 | -4.692459791 | -0.323358957  | -6.897815486 |
| H312 | 4.536548410  | -9.882530195  | 5.367637862  |
| H313 | 3.615011384  | -12.265354271 | 3.673798690  |
| H314 | 0.285668564  | -0.349077713  | -3.734940788 |
| H315 | 4.705160888  | -12.223289140 | 6.377272020  |
| H316 | 3.163467884  | -12.451935706 | 5.874895545  |
| H317 | 5.067533477  | -3.586023714  | 2.637925216  |
| H318 | -0.134549179 | 1.903017817   | -4.669569326 |
| H319 | -3.256445004 | -1.831728449  | -5.690682902 |
| H320 | 6.709234948  | -10.665526331 | -1.019249362 |
| H321 | 6.059311903  | -8.144062346  | -3.080175332 |
| H322 | 5.728732173  | -8.813342749  | 0.452044231  |
| H323 | 5.876923378  | -11.151145161 | -2.235104561 |
| H324 | 5.769834469  | 2.306350257   | -9.029719478 |
| H325 | 5.869906511  | -5.656344630  | 0.249451887  |
| H326 | 1.356806373  | -7.899122707  | 1.022958003  |
| H327 | 3.712203075  | -2.294001872  | -7.215100605 |
| H328 | 2.105657236  | -9.383363683  | -0.588289595 |
| H329 | 2.913888798  | -7.194668166  | -6.670981114 |
| H330 | 2.055453995  | -5.612896048  | -4.892199894 |
| H331 | 5.158270881  | -12.945282724 | 4.199687940  |
| H332 | 4.931945135  | -1.335073699  | 2.415342296  |
| H333 | 7.661460843  | -6.625196580  | 1.457654594  |
| H334 | 6.917822418  | -4.520091800  | 0.401076852  |
| H335 | 8.017715407  | -7.715155988  | 3.526959701  |
| H336 | 3.269082894  | -3.094081697  | 5.716557656  |
| H337 | 3.206127764  | -8.545914584  | -3.322764422 |
| H338 | 4.230376345  | -8.989862828  | -1.951680780 |
| H339 | 1.158792378  | -8.745735969  | -1.943029506 |
| H340 | 1.666218715  | -2.235827559  | -5.882247261 |
| H341 | -2.108755166 | 2.301326218   | -6.165550865 |
| H342 | -4.382796149 | 1.429202551   | -6.965505512 |
| H343 | 1.614786693  | -6.151586821  | 0.885908483  |
| H344 | 7.649110654  | -8.170556295  | 1.283303407  |
| H345 | 6.319893600  | -9.957225458  | 1.312039909  |
| H346 | 3.206997103  | -1.410903506  | 5.488432616  |
| H347 | 5.267332359  | -8.072396114  | -6.132399405 |
| H348 | 6.140124616  | -6.478061297  | -2.532234038 |
| H349 | 0.809689612  | -2.950617588  | -7.277908316 |
| H350 | 5.209538557  | 3.680363186   | -6.362921035 |
| H351 | 7.274332086  | -0.643195335  | 4.688574616  |
| H352 | 7.518235516  | -0.236193954  | 2.974971189  |
| H353 | 8.692154367  | -7.690978880  | -5.623143003 |
| H354 | 7.747481659  | -8.831275481  | -4.925854976 |
| H355 | 9.519111934  | -9.562164678  | -0.858885836 |
| H356 | 7.905636872  | -9.027398351  | -2.375770543 |
| H357 | 11.172570712 | -8.636451875  | -2.838482586 |
| H358 | 9.492689457  | -7.852856633  | -0.374599214 |
| H359 | 10.158611002 | -0.773310333  | 3.191397898  |
| H360 | -2.064446153 | 13.402038292  | 3.553748331  |
| H361 | 8.973034423  | -7.834806234  | 6.380062175  |
| H362 | 8.704511405  | -5.374842803  | 5.185924672  |
| H363 | -3.682377251 | 12.705945555  | 1.103960561  |
| H364 | -3.504154304 | 10.641225560  | 3.386354034  |
| H365 | -4.965299639 | 11.498827497  | 2.860293392  |
| H366 | -5.640909105 | 7.347584985   | -2.051733356 |
| H367 | -1.676604461 | -0.007662238  | -0.844244664 |
| M036 | 3.485565330  | -4.665939692  | -2.039558280 |
| N369 | -7.702926122 | -6.507350038  | -0.872138065 |
| N370 | -9.343370789 | -3.807551622  | 1.133010653  |
| N371 | -8.832911442 | -4.081724765  | 3.887389618  |
| N372 | -6.233724780 | -5.159332938  | 4.008348599  |

|      |              |               |               |
|------|--------------|---------------|---------------|
| N373 | -4.682049223 | -2.950238572  | 3.138712852   |
| N374 | -5.195954706 | -1.146581316  | 5.312974162   |
| N375 | -4.472086779 | -2.571620400  | 7.746425816   |
| N376 | -2.085711244 | -4.049151706  | 7.192982508   |
| N377 | -0.393316984 | -2.648206400  | 5.309479132   |
| N378 | -0.297991425 | 0.193193923   | 6.105172481   |
| N379 | -0.867361268 | 0.150348857   | 9.027515073   |
| N380 | 4.003358697  | -11.895789738 | 5.710341759   |
| N381 | 5.051034376  | -9.746463106  | 4.490853097   |
| N382 | 4.545321668  | -3.603662521  | 3.515165254   |
| N383 | 0.198219541  | 2.629024012   | -0.794771485  |
| N384 | -0.211684563 | 2.959893385   | 0.185480639   |
| N385 | 3.729944124  | -2.286452599  | 5.294730312   |
| N386 | 4.526823331  | -1.293826293  | 3.365506585   |
| N387 | 7.977246407  | -7.822804592  | 4.564297781   |
| N388 | -5.913458119 | -2.423980081  | -3.360901590  |
| N389 | -2.264628462 | -5.431859516  | -3.334352043  |
| N390 | -5.924079271 | 0.091359017   | -2.654583619  |
| N391 | -8.164418712 | 1.445716432   | -1.646120394  |
| N392 | -7.924094310 | 1.082227369   | 1.133950701   |
| N393 | -5.684204733 | 2.610278942   | 1.835669434   |
| N394 | -2.938282322 | 2.831213537   | -1.323597138  |
| N395 | -2.262557757 | 0.848513811   | -0.790142726  |
| N396 | -6.121663982 | 5.292869307   | 2.398303142   |
| N397 | -9.158790258 | 8.612410835   | 0.867057424   |
| N398 | -9.025777763 | 10.356435000  | 2.232010906   |
| N399 | 9.369531079  | 1.703055200   | 3.376969389   |
| N400 | 6.881048850  | 6.562124610   | 0.336555174   |
| N401 | 5.099996689  | 8.010728786   | -2.337766499  |
| N402 | 2.446580259  | 7.615031041   | -3.025824574  |
| N403 | -2.224612748 | 6.606288410   | -4.644518618  |
| N404 | -2.120707871 | 8.458544801   | -6.072832632  |
| N405 | -3.349093162 | 8.566081255   | -4.110747617  |
| N406 | 1.209991752  | 6.233142221   | -0.851390415  |
| N407 | 1.559854872  | 8.107916632   | 1.207190824   |
| N408 | 0.532604771  | 10.580561902  | 0.750217663   |
| N409 | -0.716797500 | 10.448738730  | -3.080840798  |
| N410 | -1.844581084 | 11.793623255  | 1.566414057   |
| N411 | 4.414426735  | -5.052340897  | -9.860547853  |
| N412 | 2.862855083  | -2.776491320  | -7.519105004  |
| N413 | 1.993841416  | 0.131994586   | -7.004106800  |
| N414 | 4.256898107  | 1.876732636   | -6.947433489  |
| N415 | -1.054689045 | -2.852092665  | -10.154339351 |
| N416 | -2.599399090 | -0.871004606  | -8.776561746  |
| N417 | 7.762947403  | -7.850882366  | -5.223313842  |
| N418 | 3.958726479  | -5.966228981  | -3.932314972  |
| N419 | 3.459989151  | -6.910948369  | -5.861479696  |
| N420 | 8.641153350  | -8.324319770  | -2.269152083  |
| O421 | -7.179461116 | -4.513088228  | 1.138433731   |
| O422 | -7.716438433 | -2.094422897  | 3.860886949   |
| O423 | -6.107435479 | -4.534194751  | 6.199766891   |
| O424 | -3.004557283 | -3.748608360  | 4.453827489   |
| O425 | -3.118290428 | -0.302360071  | 4.908374967   |
| O426 | -3.677783628 | -0.550486748  | 8.458165441   |
| O427 | -1.555885079 | -3.930646719  | 9.425548709   |
| O428 | 1.380146250  | -3.753341860  | 6.260354437   |
| O429 | 1.937018707  | -0.139350246  | 5.793436263   |
| O430 | 1.064641076  | 1.337794683   | 9.111074165   |
| O431 | 0.990531664  | -0.690239944  | 11.976566537  |
| O432 | 5.836517016  | -10.972451999 | 2.692547367   |
| O433 | 6.674318268  | -8.333640130  | 6.388394509   |
| O434 | 10.691926318 | -5.680075696  | 5.523358848   |
| O435 | -5.708750992 | -0.317422411  | -0.407721324  |
| O436 | -3.855289474 | -4.119994504  | -4.293166838  |
| O437 | -6.790155289 | 3.141648432   | -0.977043092  |
| O438 | -5.761513879 | 3.576403602   | -3.868315658  |
| O439 | -9.734682682 | 2.451754792   | 1.476095504   |
| O440 | -5.851548120 | 1.961698032   | 4.020041959   |
| O441 | -4.111236127 | 5.420313674   | 3.478776587   |
| O442 | -6.379777107 | 7.801296698   | 4.877999501   |
| O443 | 10.250935271 | -1.164639516  | 5.192219729   |
| O444 | 3.475073330  | 4.204794058   | 4.325712324   |
| O445 | 4.326733433  | 8.002561061   | -0.191971564  |
| O446 | 2.113604372  | 9.861684372   | -3.380336197  |
| O447 | -0.755887335 | 7.165643035   | -1.567231920  |
| O448 | -0.362445996 | 7.314964006   | 2.183358424   |
| O449 | 2.662754369  | 5.553452132   | 1.903595117   |
| O450 | 1.675536248  | 11.494950816  | 2.515709593   |
| O451 | -1.266767720 | 13.754249268  | 0.557182966   |
| O452 | -2.159335050 | 11.289610945  | -1.520441977  |
| O453 | -3.972690277 | 14.093762727  | 3.324302209   |
| O454 | -4.728637317 | 7.283991519   | -1.708361698  |

|                                                                                                                                                                                                                                      |                                   |              |               |              |
|--------------------------------------------------------------------------------------------------------------------------------------------------------------------------------------------------------------------------------------|-----------------------------------|--------------|---------------|--------------|
|                                                                                                                                                                                                                                      | O455                              | 2.020774218  | -4.666557972  | -8.518194428 |
|                                                                                                                                                                                                                                      | O456                              | 0.464000703  | -0.727031941  | -8.478883542 |
|                                                                                                                                                                                                                                      | O457                              | 3.060414969  | 3.488400213   | -8.017539134 |
|                                                                                                                                                                                                                                      | O458                              | 6.852172499  | 3.919570591   | -8.399228436 |
|                                                                                                                                                                                                                                      | O459                              | -4.409647403 | -2.162357071  | -9.278889328 |
|                                                                                                                                                                                                                                      | O460                              | -1.600631654 | -6.456869633  | -6.110218812 |
|                                                                                                                                                                                                                                      | O461                              | 0.434194180  | -5.748059225  | -6.688523602 |
|                                                                                                                                                                                                                                      | O462                              | -2.922654103 | 2.673120591   | -8.649441612 |
|                                                                                                                                                                                                                                      | O463                              | 9.591729231  | -6.344165890  | -2.825236608 |
|                                                                                                                                                                                                                                      | O464                              | 12.006548947 | -8.123822309  | -1.048570995 |
|                                                                                                                                                                                                                                      | O465                              | -0.282037401 | -6.162517854  | -1.250420742 |
|                                                                                                                                                                                                                                      | O466                              | -1.080790176 | -7.135419591  | 0.613128440  |
|                                                                                                                                                                                                                                      | O467                              | 4.242613036  | -11.294369084 | -2.885497045 |
|                                                                                                                                                                                                                                      | O468                              | 2.001171472  | -11.084534316 | -3.113760711 |
|                                                                                                                                                                                                                                      | O469                              | 4.487726536  | -6.202641702  | -0.841093174 |
|                                                                                                                                                                                                                                      | O470                              | 4.168739867  | -7.930210557  | 0.559494305  |
|                                                                                                                                                                                                                                      | O471                              | 2.082514259  | -6.246808436  | -1.827736867 |
|                                                                                                                                                                                                                                      | O472                              | 8.137770352  | -7.440397740  | 1.753188557  |
|                                                                                                                                                                                                                                      | O473                              | 6.512671999  | -5.258965070  | 0.891384434  |
|                                                                                                                                                                                                                                      | O474                              | -3.755343792 | 5.079933639   | -2.762747985 |
|                                                                                                                                                                                                                                      | O475                              | 6.806927465  | -11.163390945 | -1.861552727 |
|                                                                                                                                                                                                                                      | O476                              | 6.545363070  | -9.368320177  | 0.546120724  |
|                                                                                                                                                                                                                                      | S477                              | 3.982471569  | 4.643997848   | -1.855437689 |
|                                                                                                                                                                                                                                      | S478                              | 2.368231679  | 1.649758121   | -3.170701854 |
|                                                                                                                                                                                                                                      | S479                              | 1.994613153  | -3.393119186  | -3.433481298 |
|                                                                                                                                                                                                                                      | S480                              | 3.250586581  | 1.473117571   | 0.330937526  |
|                                                                                                                                                                                                                                      | S481                              | 0.493420471  | -0.959147515  | -1.010279214 |
|                                                                                                                                                                                                                                      | S482                              | 4.568279247  | -1.048683440  | -5.041007459 |
|                                                                                                                                                                                                                                      | S483                              | 3.004018707  | -3.753957911  | 0.200666130  |
|                                                                                                                                                                                                                                      | S484                              | 5.826513907  | 1.334818635   | -2.196835719 |
|                                                                                                                                                                                                                                      | S485                              | 5.578639380  | -3.637675224  | -2.499257317 |
|                                                                                                                                                                                                                                      | S486                              | 5.963718828  | -1.395718622  | 0.431578337  |
|                                                                                                                                                                                                                                      | end                               |              |               |              |
| <b>rest-3b5</b><br><b>2N2 TS</b><br><b>35, S=1/2</b><br><br><b>Fe(139) -2.088</b><br><b>Fe(140) -2.632</b><br><b>Fe(141) -2.570</b><br><b>Fe(142) 2.800</b><br><b>Fe(143) 2.951</b><br><b>Fe(144) 2.275</b><br><b>Fe(145) -0.111</b> | <b>bm522n2x3b5dtd_1_52967.435</b> |              |               |              |
|                                                                                                                                                                                                                                      | C1                                | -8.349238862 | -4.646467441  | 0.709811925  |
|                                                                                                                                                                                                                                      | C2                                | -8.791348263 | -5.752356268  | -0.255561740 |
|                                                                                                                                                                                                                                      | C3                                | -9.038715686 | -2.622289937  | 1.916403924  |
|                                                                                                                                                                                                                                      | C4                                | -8.465943118 | -2.911371614  | 3.301279781  |
|                                                                                                                                                                                                                                      | C5                                | -8.285499146 | -4.478068421  | 5.168751375  |
|                                                                                                                                                                                                                                      | C6                                | -6.772626535 | -4.711302500  | 5.165137631  |
|                                                                                                                                                                                                                                      | C7                                | -4.780645225 | -5.266310585  | 3.869598032  |
|                                                                                                                                                                                                                                      | C8                                | -4.073377998 | -3.909709204  | 3.856502406  |
|                                                                                                                                                                                                                                      | C9                                | -4.160801281 | -1.571922860  | 3.149880395  |
|                                                                                                                                                                                                                                      | C10                               | -4.110384680 | -0.936477915  | 4.548667049  |
|                                                                                                                                                                                                                                      | C11                               | -5.263808391 | -0.517426003  | 6.644826273  |
|                                                                                                                                                                                                                                      | C12                               | -4.385917719 | -1.205637592  | 7.698227809  |
|                                                                                                                                                                                                                                      | C13                               | -3.792853748 | -3.307140117  | 8.805423533  |
|                                                                                                                                                                                                                                      | C14                               | -2.358372634 | -3.764818398  | 8.506660367  |
|                                                                                                                                                                                                                                      | C15                               | -0.808922579 | -4.588424263  | 6.776565029  |
|                                                                                                                                                                                                                                      | C16                               | 0.159582232  | -3.615823661  | 6.094322308  |
|                                                                                                                                                                                                                                      | C17                               | 0.422698384  | -1.635329541  | 4.632279116  |
|                                                                                                                                                                                                                                      | C18                               | 0.765580349  | -0.460814422  | 5.579814383  |
|                                                                                                                                                                                                                                      | C19                               | -0.239205174 | -1.174674484  | 3.318502521  |
|                                                                                                                                                                                                                                      | C20                               | 0.577887090  | -0.055217825  | 2.665415481  |
|                                                                                                                                                                                                                                      | C21                               | -0.421834227 | -2.364226666  | 2.368928461  |
|                                                                                                                                                                                                                                      | C22                               | -0.104011007 | 1.360898658   | 7.006958308  |
|                                                                                                                                                                                                                                      | C23                               | 0.087514026  | 0.952592013   | 8.483321446  |
|                                                                                                                                                                                                                                      | C24                               | -1.249342817 | 2.387539951   | 6.822020868  |
|                                                                                                                                                                                                                                      | C25                               | -1.132908491 | 3.536216375   | 7.831094974  |
|                                                                                                                                                                                                                                      | C26                               | -1.260457695 | 2.931929833   | 5.387902771  |
|                                                                                                                                                                                                                                      | C27                               | -0.793375298 | -0.149996125  | 10.460668634 |
|                                                                                                                                                                                                                                      | C28                               | 0.546799463  | -0.731470684  | 10.863599448 |
|                                                                                                                                                                                                                                      | C29                               | 4.489180673  | -12.090523705 | 4.338556145  |
|                                                                                                                                                                                                                                      | C30                               | 5.203442414  | -10.869726442 | 3.761478152  |
|                                                                                                                                                                                                                                      | C31                               | 5.636687712  | -8.447827262  | 4.186834534  |
|                                                                                                                                                                                                                                      | C32                               | 6.803491918  | -8.187905213  | 5.159800503  |
|                                                                                                                                                                                                                                      | C33                               | 4.566046349  | -7.348730511  | 4.290813826  |
|                                                                                                                                                                                                                                      | C34                               | 5.112650537  | -5.951087472  | 3.995211259  |
|                                                                                                                                                                                                                                      | C35                               | 3.988562702  | -4.927584278  | 3.851992057  |
|                                                                                                                                                                                                                                      | C36                               | 4.240064677  | -2.426407302  | 3.996344385  |
|                                                                                                                                                                                                                                      | C37                               | 9.165244101  | -7.557412906  | 5.341816020  |
|                                                                                                                                                                                                                                      | C38                               | 9.553629486  | -6.095144028  | 5.358147253  |
|                                                                                                                                                                                                                                      | C39                               | -5.473900104 | -2.200130166  | -1.964493369 |
|                                                                                                                                                                                                                                      | C40                               | -5.708648526 | -0.731663570  | -1.564221189 |
|                                                                                                                                                                                                                                      | C41                               | -3.974466590 | -2.516802808  | -1.774663209 |
|                                                                                                                                                                                                                                      | C42                               | -3.589249621 | -4.008594326  | -1.865446446 |
|                                                                                                                                                                                                                                      | C43                               | -3.248563962 | -4.516439110  | -3.266220107 |
|                                                                                                                                                                                                                                      | C44                               | -5.849566588 | 1.538350911   | -2.514657379 |
|                                                                                                                                                                                                                                      | C45                               | -6.969645213 | 2.117611417   | -1.640186123 |
|                                                                                                                                                                                                                                      | C46                               | -5.826341202 | 2.145025075   | -3.924067728 |
|                                                                                                                                                                                                                                      | C47                               | -9.252354301 | 1.826277439   | -0.796120326 |

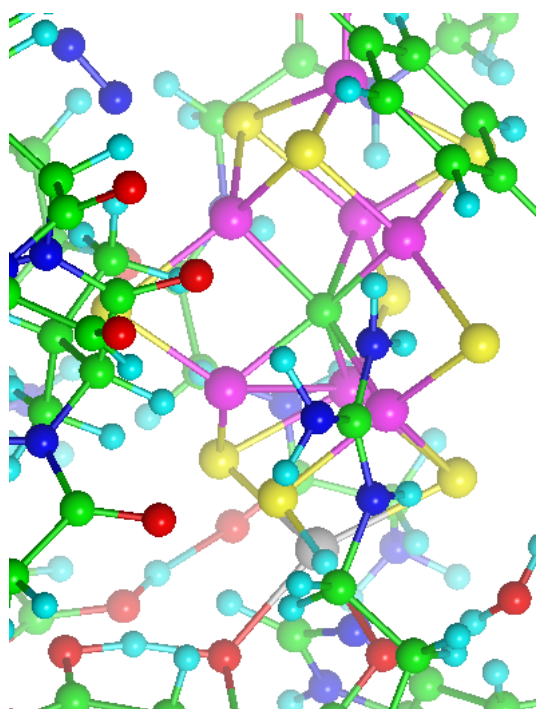

|      |              |              |              |
|------|--------------|--------------|--------------|
| C48  | -8.979674990 | 1.809670256  | 0.712093046  |
| C49  | -7.500089369 | 1.096456020  | 2.532330477  |
| C50  | -6.263780211 | 1.929111135  | 2.867091914  |
| C51  | -4.526391424 | 3.474568798  | 2.114632921  |
| C52  | -4.931982913 | 4.806434746  | 2.786120564  |
| C53  | -3.789172646 | 3.860046456  | 0.824045107  |
| C54  | -3.182442646 | 2.738692567  | 0.047003315  |
| C55  | -2.759386131 | 1.473689586  | 0.374799394  |
| C56  | -2.306046481 | 1.795760667  | -1.777837115 |
| C57  | -6.583520868 | 6.629485845  | 2.737808692  |
| C58  | -6.642034923 | 6.761463040  | 4.258964133  |
| C59  | -7.990665082 | 6.826565049  | 2.125540854  |
| C60  | -8.478552152 | 8.239492710  | 1.994585813  |
| C61  | -8.394679351 | 9.313360944  | 2.859639293  |
| C62  | -9.489345555 | 9.888004277  | 1.020176887  |
| C63  | 8.918013431  | 0.678838718  | 4.361313697  |
| C64  | 9.847155733  | -0.516458720 | 4.266372242  |
| C65  | 7.494123885  | 0.171131194  | 4.020348298  |
| C66  | 6.445190667  | 1.254072125  | 4.114564194  |
| C67  | 5.776367739  | 1.514126810  | 5.324596975  |
| C68  | 6.100824705  | 2.027239031  | 2.992638814  |
| C69  | 4.784333183  | 2.495951244  | 5.413265475  |
| C70  | 5.123473687  | 3.020324218  | 3.069692726  |
| C71  | 4.457605502  | 3.244628608  | 4.277757284  |
| C72  | 5.972880849  | 6.297580645  | -0.777449895 |
| C73  | 5.053751766  | 7.498380583  | -1.065496336 |
| C74  | 5.132298939  | 5.070459589  | -0.447031368 |
| C75  | 4.326436329  | 9.159313777  | -2.745409756 |
| C76  | 2.854775104  | 8.898544110  | -3.076451264 |
| C77  | 1.073960103  | 7.154589856  | -3.180442623 |
| C78  | 0.411258241  | 6.848814415  | -1.811553356 |
| C79  | 1.105401378  | 5.920458143  | -4.112619634 |
| C80  | -0.191796596 | 5.148986681  | -4.384829106 |
| C81  | -1.203091799 | 5.801000198  | -5.340919335 |
| C82  | -2.566183359 | 7.857713084  | -4.967027004 |
| C83  | 0.610769854  | 5.915538910  | 0.443344822  |
| C84  | 0.496656638  | 7.166403974  | 1.320664276  |
| C85  | 1.432451871  | 4.879493763  | 1.240868020  |
| C86  | 1.776388067  | 9.057406985  | 2.185573270  |
| C87  | 1.332197797  | 10.465991250 | 1.834978776  |
| C88  | 0.210113402  | 11.873858456 | 0.196581910  |
| C89  | -1.050028771 | 12.557442150 | 0.783475422  |
| C90  | 0.176816145  | 11.909408555 | -1.333718552 |
| C91  | -1.007596917 | 11.176485240 | -1.952618376 |
| C92  | -3.167416281 | 12.265667132 | 1.977331221  |
| C93  | -3.064864534 | 13.364519174 | 3.027221412  |
| C94  | -4.008640953 | 11.079906879 | 2.526592453  |
| C95  | -4.258489363 | 10.026230792 | 1.471950018  |
| C96  | -5.367514176 | 10.123147294 | 0.616682039  |
| C97  | -3.361520127 | 8.963051361  | 1.273922671  |
| C98  | -5.564002313 | 9.206726229  | -0.419796785 |
| C99  | -3.524142716 | 8.055851776  | 0.222809912  |
| C100 | -4.623874811 | 8.195709356  | -0.619623250 |
| C101 | 4.408242728  | -4.310756923 | -8.583156827 |
| C102 | 2.986664221  | -3.921332164 | -8.214120380 |
| C103 | 1.600460140  | -2.263894150 | -6.981075939 |
| C104 | 1.272320439  | -0.882000600 | -7.555708055 |
| C105 | 1.849350275  | 1.505879002  | -7.473782594 |
| C106 | 3.109599761  | 2.364882109  | -7.508990664 |
| C107 | 5.416463041  | 2.745703322  | -6.838336350 |
| C108 | 6.081956595  | 2.978363490  | -8.180319777 |
| C109 | -2.253467166 | -3.240701282 | -9.362544933 |
| C110 | -3.196639212 | -2.054886076 | -9.125216666 |
| C111 | -1.987659533 | -3.964698426 | -8.022190175 |
| C112 | -1.386546993 | -5.364912990 | -8.246128473 |
| C113 | -0.872348347 | -5.928421308 | -6.940996301 |
| C114 | -3.440789197 | 0.290299689  | -8.481200612 |
| C115 | -2.789188536 | 1.530860969  | -9.058093482 |
| C116 | -3.928397002 | 0.433660614  | -7.018972024 |
| C117 | -2.811363586 | 0.264365430  | -6.023048180 |
| C118 | -1.940392953 | 1.324570356  | -5.715620329 |
| C119 | -2.558669552 | -0.999675832 | -5.463833820 |
| C120 | -0.816811757 | 1.105303794  | -4.910216117 |
| C121 | -1.436574063 | -1.217447767 | -4.657561234 |
| C122 | -0.551039939 | -0.168579965 | -4.393417033 |
| C123 | 7.602700810  | -6.955152062 | -4.061045356 |
| C124 | 8.687142664  | -7.163034150 | -2.991764784 |
| C125 | 6.203967923  | -7.143194498 | -3.452136454 |
| C126 | 5.040025702  | -6.814338265 | -4.334051447 |
| C127 | 4.726321574  | -7.398714075 | -5.544086091 |
| C128 | 3.053679764  | -6.095455054 | -4.911779685 |
| C129 | 9.642019913  | -8.524175237 | -1.226707658 |

|       |               |               |              |
|-------|---------------|---------------|--------------|
| C130  | 11.054576530  | -8.390363627  | -1.750917056 |
| C131  | -0.115350038  | -6.811020921  | -0.116917927 |
| C132  | 1.331454382   | -7.044237550  | 0.306920917  |
| C133  | 2.330025692   | -7.269167608  | -0.868543395 |
| C134  | 2.150138023   | -8.696509685  | -1.447984826 |
| C135  | 3.249142143   | -9.154201566  | -2.409431989 |
| C136  | 3.151013703   | -10.639377248 | -2.827017050 |
| C137  | 3.765742827   | -7.141347040  | -0.332125024 |
| C138  | 3.615567454   | -1.074948931  | -1.819074288 |
| Fe139 | 3.950779812   | -2.325469917  | -3.351422246 |
| Fe140 | 2.251999530   | 0.338828737   | -1.326205007 |
| Fe141 | 4.851843632   | 0.058292996   | -0.744634954 |
| Fe142 | 4.123900070   | 0.218810451   | -3.266508380 |
| Fe143 | 3.962465364   | 2.360984202   | -1.629294645 |
| Fe144 | 4.576936503   | -2.528083245  | -0.863753626 |
| Fe145 | 2.148688049   | -2.232553216  | -1.614066143 |
| H146  | -7.115984205  | -6.915191580  | -0.171271501 |
| H147  | -7.142224204  | -5.904085672  | -1.452474453 |
| H148  | -10.257289410 | -3.871870399  | 0.688763931  |
| H149  | -9.431362500  | -5.301403651  | -1.031332327 |
| H150  | -9.442726411  | -6.436747820  | 0.314225495  |
| H151  | -8.302929937  | -1.985561015  | 1.403060945  |
| H152  | -9.451197853  | -4.704465623  | 3.374752366  |
| H153  | -9.963700039  | -2.043233606  | 2.039528622  |
| H154  | -8.782629204  | -5.405776242  | 5.482153739  |
| H155  | -6.793980516  | -5.191101893  | 3.156202864  |
| H156  | -8.484474167  | -3.709386360  | 5.927146651  |
| H157  | -3.138585671  | -1.558659599  | 2.753411351  |
| H158  | -5.554565812  | -3.128824738  | 2.664293465  |
| H159  | -4.557649422  | -5.798413506  | 2.935137190  |
| H160  | -4.937864923  | 0.528747752   | 6.589103414  |
| H161  | -6.031268221  | -1.576943761  | 4.935410818  |
| H162  | -4.366011481  | -5.843858673  | 4.704397643  |
| H163  | -4.794665144  | -0.966104868  | 2.487806744  |
| H164  | -5.119500495  | -3.060859521  | 7.144162350  |
| H165  | -6.309217815  | -0.539095185  | 6.981655744  |
| H166  | -0.979336529  | -3.184275310  | 2.842983155  |
| H167  | -0.966473628  | -2.054400997  | 1.464893965  |
| H168  | 0.552625549   | -2.750951078  | 2.032596057  |
| H169  | -1.229287419  | -0.765482704  | 3.583769284  |
| H170  | -4.386316285  | -4.205625161  | 9.029302963  |
| H171  | -1.386256461  | 2.130900263   | 4.646156641  |
| H172  | -1.726599118  | -0.082064775  | 8.551681673  |
| H173  | -1.187545263  | 3.189099100   | 8.872745040  |
| H174  | 0.102766806   | 0.260750694   | 1.726243373  |
| H175  | 1.591571349   | -0.394086070  | 2.406435773  |
| H176  | 8.916098026   | 1.014880290   | 5.416065831  |
| H177  | -2.087186827  | 3.646244856   | 5.257459295  |
| H178  | -1.951703349  | 4.253390734   | 7.671701927  |
| H179  | -0.317446564  | 3.459951117   | 5.170811256  |
| H180  | -0.180058289  | 4.073962980   | 7.701939606  |
| H181  | -2.205447654  | 1.863712450   | 7.002631765  |
| H182  | 0.849489696   | 1.831702064   | 6.727792267  |
| H183  | -1.235502106  | -0.057094557  | 5.850224961  |
| H184  | 0.667262627   | 0.827322024   | 3.316712190  |
| H185  | 1.768177086   | 4.080159773   | 0.567667649  |
| H186  | 0.753100696   | 4.446325805   | 1.992856207  |
| H187  | 2.786501059   | 4.959402786   | 2.661772022  |
| H188  | 3.081045776   | 4.283418291   | 5.174255266  |
| H189  | 4.851016406   | 3.599167027   | 2.187675627  |
| H190  | 6.582190391   | 1.833043334   | 2.031467413  |
| H191  | 6.018401251   | 0.925041726   | 6.212790121  |
| H192  | -1.398168312  | -2.649778862  | 5.166116558  |
| H193  | -0.985595881  | -5.423800146  | 6.081008265  |
| H194  | -0.289181145  | -4.979533858  | 7.658526625  |
| H195  | -2.808474818  | -3.926808308  | 6.493281208  |
| H196  | -3.745531297  | -2.694728474  | 9.714160906  |
| H197  | 4.256189378   | 2.661645561   | 6.355547015  |
| H198  | 1.381691463   | -2.109527453  | 4.394179687  |
| H199  | -1.007092592  | 0.726496278   | 11.094216265 |
| H200  | -1.554404751  | -0.917640324  | 10.669748882 |
| H201  | 1.084186455   | -1.284912489  | 10.058986925 |
| H202  | 10.014290129  | -8.159585959  | 4.983412659  |
| H203  | -2.015933750  | -5.821530463  | -4.251037123 |
| H204  | 0.741447715   | -6.059488553  | -1.675909816 |
| H205  | -2.165839362  | -6.038352577  | -8.629133276 |
| H206  | -0.572829159  | -5.317418204  | -8.984244895 |
| H207  | -2.924089137  | -4.067113955  | -7.452531394 |
| H208  | -2.159977783  | 1.341363195   | -9.959057361 |
| H209  | -2.846013640  | -3.920351653  | -9.993267081 |
| H210  | -3.395063758  | -1.933681752  | -2.509158964 |
| H211  | -4.419006671  | -4.633045013  | -1.490847971 |

|      |               |              |               |
|------|---------------|--------------|---------------|
| H212 | -1.607962381  | -0.823524090 | -8.595750718  |
| H213 | -4.345500210  | 0.148470334  | -9.107842303  |
| H214 | -0.392218373  | -2.341143210 | -9.561420512  |
| H215 | -1.705050513  | -5.703451140 | -2.520219036  |
| H216 | -1.314349702  | -3.343481117 | -7.410605713  |
| H217 | -0.599664806  | -3.681378167 | -10.492823403 |
| H218 | -6.858283454  | -2.806756205 | -3.373614020  |
| H219 | -3.691594238  | -2.155679680 | -0.775190137  |
| H220 | 0.923753135   | -5.308713307 | -7.448459470  |
| H221 | -2.740664838  | -4.202212676 | -1.193594568  |
| H222 | -3.854492563  | 2.971754075  | 2.824183052   |
| H223 | -2.784838763  | 0.942275250  | 1.318596590   |
| H224 | -8.330496839  | 1.508877852  | 3.122624969   |
| H225 | -7.306260247  | 0.597434824  | 0.467446301   |
| H226 | -6.735059323  | 4.706289948  | 1.809093755   |
| H227 | -7.932090948  | 9.438183866  | 3.832454063   |
| H228 | -6.947213555  | 5.821117360  | 4.778872012   |
| H229 | -8.714583996  | 6.211974432  | 2.690724569   |
| H230 | -5.884904371  | 7.383883937  | 2.343353283   |
| H231 | -10.035074596 | 10.511610501 | 0.316454705   |
| H232 | -2.997687499  | 4.576215922  | 1.101175796   |
| H233 | -4.491499181  | 4.397025613  | 0.167417223   |
| H234 | -9.151605622  | 11.294871805 | 2.582863661   |
| H235 | -7.968978921  | 6.409771382  | 1.106277955   |
| H236 | -6.064583057  | 2.585459463  | 0.899690736   |
| H237 | -7.328073187  | 0.073990168  | 2.900618119   |
| H238 | -9.579126925  | 2.846839606  | -1.037145395  |
| H239 | -1.922382754  | 1.642012645  | -2.784662818  |
| H240 | -10.090651655 | 1.147477475  | -1.000824542  |
| H241 | 10.189752450  | 2.167474723  | 3.757741223   |
| H242 | 8.634523847   | 2.417906485  | 3.320764553   |
| H243 | 2.070606497   | 5.761238071  | -1.142439729  |
| H244 | -0.411278116  | 5.534095713  | 0.323813791   |
| H245 | 2.307319550   | 7.787510897  | 0.588506026   |
| H246 | -3.107942591  | 3.778799626  | -1.846761960  |
| H247 | -4.486227581  | 4.614367264  | -3.152819138  |
| H248 | -5.954458146  | 3.938059488  | -4.706149252  |
| H249 | -4.131888893  | 5.820767457  | -2.173717345  |
| H250 | -4.961960170  | 1.727880898  | -4.466130194  |
| H251 | -6.748040997  | 1.873612473  | -4.460790755  |
| H252 | 1.134820404   | 11.549781173 | -1.735003978  |
| H253 | 0.076102471   | 12.967303552 | -1.623883823  |
| H254 | 0.259872543   | 10.195149441 | -3.272295872  |
| H255 | -1.466061015  | 9.851608089  | -3.404380675  |
| H256 | -2.339083129  | 9.438462828  | -6.254685333  |
| H257 | -1.731845967  | 5.021659100  | -5.911071834  |
| H258 | -6.439688871  | 9.287611613  | -1.069430764  |
| H259 | -2.513828925  | 8.813926920  | 1.948087466   |
| H260 | -3.673675633  | 8.145441167  | -3.251160157  |
| H261 | 1.823965107   | 5.204799411  | -3.682538733  |
| H262 | 3.158929315   | 6.899854186  | -2.809634098  |
| H263 | -0.692305068  | 4.871374669  | -3.443474755  |
| H264 | -8.186344462  | 0.569007350  | -2.171271646  |
| H265 | 4.795033003   | 9.609055633  | -3.630558872  |
| H266 | -5.879375374  | -0.426068247 | -3.525609393  |
| H267 | 1.539489427   | 6.248895209  | -5.071319065  |
| H268 | -2.778187673  | 7.280110770  | 0.045960309   |
| H269 | 4.330992809   | 9.911711436  | -1.943582393  |
| H270 | -1.731387565  | 7.931273673  | -6.851335896  |
| H271 | -3.892798095  | 9.340381451  | -4.487427960  |
| H272 | -5.268758951  | -3.084288810 | -3.816166646  |
| H273 | -6.037053615  | -2.804909554 | -1.229075071  |
| H274 | -6.094657164  | 10.926232104 | 0.760796377   |
| H275 | -4.930158591  | 1.833021359  | -1.992855449  |
| H276 | 0.491857293   | 7.970384950  | -3.620911557  |
| H277 | -0.666440402  | 6.421636707  | -6.070258369  |
| H278 | 0.114635566   | 4.201761142  | -4.853281662  |
| H279 | -2.731709566  | 6.137251033  | -3.892128781  |
| H280 | 1.271421383   | 8.766893076  | 3.119305052   |
| H281 | 0.378346713   | 9.727544024  | 0.185461848   |
| H282 | 1.029279349   | 12.536474047 | 0.517712191   |
| H283 | 2.856996277   | 9.092235345  | 2.378898593   |
| H284 | -1.655118701  | 10.800806368 | 1.600390993   |
| H285 | 5.034324409   | -3.411121112 | -8.675446784  |
| H286 | 4.792903950   | -4.878671921 | -7.710389577  |
| H287 | 7.717882700   | -5.910182502 | -4.385664505  |
| H288 | 5.338794835   | -5.509338277 | -9.941023547  |
| H289 | 3.740504264   | -5.818840110 | -9.771566301  |
| H290 | 5.815025952   | 4.236002656  | -0.240121378  |
| H291 | 6.328305868   | 6.895888523  | 1.144960960   |
| H292 | 5.728004422   | 7.571162034  | -3.008250598  |
| H293 | 4.507226065   | 5.266424185  | 0.435135400   |



|       |              |               |              |
|-------|--------------|---------------|--------------|
| H294  | 7.504003258  | 7.350588968   | 0.100728951  |
| H295  | 6.151193437  | 2.243894542   | -6.189170302 |
| H296  | 6.588029286  | 6.082581184   | -1.664946447 |
| H297  | 4.118508002  | -7.376975505  | 5.298043843  |
| H298  | 6.011168924  | -8.490197338  | 3.157064498  |
| H299  | 4.269917899  | 0.989755731   | -6.451460335 |
| H300  | 4.550400232  | -0.416719814  | 3.789771209  |
| H301  | 3.694315013  | -4.704513046  | 0.909516412  |
| H302  | 1.430793389  | 1.485480584   | -8.487925380 |
| H303  | -1.243743809 | -2.210533383  | -4.244692879 |
| H304  | 1.121710037  | 2.047931318   | -6.845986041 |
| H305  | 3.431416513  | -4.825034594  | 4.790298646  |
| H306  | 2.563440991  | -0.085788391  | -6.193222678 |
| H307  | 3.260046813  | -5.272843706  | 3.097580572  |
| H308  | 3.773333243  | -7.601867483  | 3.568645845  |
| H309  | 5.689816713  | -5.965576172  | 3.058523610  |
| H310  | 5.795752014  | -5.620930355  | 4.793519290  |
| H311  | -4.702457705 | -0.328618511  | -6.851782910 |
| H312  | 4.534782575  | -9.879437780  | 5.363417400  |
| H313  | 3.627854958  | -12.276101228 | 3.679430826  |
| H314  | 0.328787019  | -0.334819277  | -3.771601950 |
| H315  | 4.722696080  | -12.208425780 | 6.382055401  |
| H316  | 3.183618520  | -12.464507827 | 5.884110335  |
| H317  | 5.008741325  | -3.601015276  | 2.547899876  |
| H318  | -0.124591136 | 1.921140862   | -4.686042137 |
| H319  | -3.241210764 | -1.829069357  | -5.665148822 |
| H320  | 6.708867317  | -10.658858193 | -1.024242127 |
| H321  | 6.092236625  | -8.197191676  | -3.143115436 |
| H322  | 5.737027363  | -8.810173036  | 0.449670609  |
| H323  | 5.878862754  | -11.150824346 | -2.239623568 |
| H324  | 5.828006466  | 2.233689906   | -8.972164383 |
| H325  | 5.887136055  | -5.651821117  | 0.237460112  |
| H326  | 1.367824948  | -7.880195174  | 1.015193256  |
| H327  | 3.704843885  | -2.287973587  | -7.211894078 |
| H328  | 2.119137834  | -9.383452756  | -0.587824427 |
| H329  | 2.931726353  | -7.216115411  | -6.695722742 |
| H330  | 2.080532519  | -5.622298555  | -4.923087480 |
| H331  | 5.176218125  | -12.943771332 | 4.207089760  |
| H332  | 4.934620149  | -1.353403621  | 2.360680949  |
| H333  | 7.669187144  | -6.624462055  | 1.456794477  |
| H334  | 6.922696285  | -4.506550301  | 0.405586622  |
| H335  | 8.013809536  | -7.713624249  | 3.530997319  |
| H336  | 3.263192634  | -3.112724692  | 5.658642915  |
| H337  | 3.207861233  | -8.551286163  | -3.328753342 |
| H338  | 4.239755928  | -8.990414399  | -1.962480917 |
| H339  | 1.168041852  | -8.750926521  | -1.942378924 |
| H340  | 1.659998660  | -2.225782330  | -5.882350257 |
| H341  | -2.128805088 | 2.313632009   | -6.141593440 |
| H342  | -4.400249748 | 1.425071277   | -6.933063738 |
| H343  | 1.620939316  | -6.133975481  | 0.857909506  |
| H344  | 7.653406103  | -8.170315186  | 1.286646982  |
| H345  | 6.322295927  | -9.958193530  | 1.309586836  |
| H346  | 3.227927463  | -1.426691732  | 5.451709608  |
| H347  | 5.272591504  | -8.111590217  | -6.150253680 |
| H348  | 6.132794352  | -6.550645551  | -2.533034961 |
| H349  | 0.804067589  | -2.952334796  | -7.272487854 |
| H350  | 5.179119237  | 3.719408644   | -6.382923891 |
| H351  | 7.255282634  | -0.643826254  | 4.720590077  |
| H352  | 7.504864816  | -0.254537929  | 3.004274249  |
| H353  | 8.741174507  | -7.619072604  | -5.632365490 |
| H354  | 7.818448081  | -8.796156061  | -4.968654563 |
| H355  | 9.524712630  | -9.554224019  | -0.855665809 |
| H356  | 7.914456768  | -9.017236714  | -2.377001341 |
| H357  | 11.177478553 | -8.618825873  | -2.836610894 |
| H358  | 9.498733645  | -7.845126762  | -0.371132321 |
| H359  | 10.142099933 | -0.784441409  | 3.222474834  |
| H360  | -2.085795835 | 13.422467868  | 3.558460697  |
| H361  | 8.958443710  | -7.847619142  | 6.387369601  |
| H362  | 8.706545010  | -5.380218068  | 5.218338227  |
| H363  | -3.686922921 | 12.694542638  | 1.104070045  |
| H364  | -3.491059758 | 10.643212277  | 3.394873018  |
| H365  | -4.960158616 | 11.498669665  | 2.884355789  |
| H366  | -5.659382586 | 7.380594546   | -2.055301529 |
| H367  | -1.654013861 | 0.049828907   | -0.831316243 |
| Mo368 | 3.486841667  | -4.667173097  | -2.067529039 |
| N369  | -7.731372383 | -6.518395071  | -0.885742544 |
| N370  | -9.341862940 | -3.806279840  | 1.127660556  |
| N371  | -8.826554408 | -4.080299335  | 3.879811920  |
| N372  | -6.224730708 | -5.150042500  | 4.003658526  |
| N373  | -4.681819516 | -2.929758799  | 3.148535538  |
| N374  | -5.199117436 | -1.131265855  | 5.328115028  |
| N375  | -4.470613293 | -2.559744860  | 7.757718235  |

|      |              |               |               |
|------|--------------|---------------|---------------|
| N376 | -2.083097266 | -4.039660795  | 7.202429593   |
| N377 | -0.390228847 | -2.637777765  | 5.329848510   |
| N378 | -0.284748552 | 0.205055638   | 6.122526931   |
| N379 | -0.861842215 | 0.159657534   | 9.041766511   |
| N380 | 4.014526179  | -11.896358903 | 5.714352989   |
| N381 | 5.048626134  | -9.744652868  | 4.486143761   |
| N382 | 4.499339819  | -3.618893555  | 3.433141617   |
| N383 | 0.550605031  | 2.185555568   | -0.590826405  |
| N384 | -0.134859209 | 2.994302630   | -0.261204634  |
| N385 | 3.730563273  | -2.308092051  | 5.237862561   |
| N386 | 4.507459127  | -1.308006505  | 3.302170117   |
| N387 | 7.967628200  | -7.820109602  | 4.568210321   |
| N388 | -5.913004472 | -2.419367563  | -3.348485313  |
| N389 | -2.259702259 | -5.425760035  | -3.336666171  |
| N390 | -5.892953210 | 0.091646957   | -2.629920024  |
| N391 | -8.137232282 | 1.436337197   | -1.641152241  |
| N392 | -7.909858572 | 1.082197215   | 1.141076075   |
| N393 | -5.663469405 | 2.606810603   | 1.841648674   |
| N394 | -2.891149919 | 2.903300605   | -1.298737959  |
| N395 | -2.228953992 | 0.913941408   | -0.772222363  |
| N396 | -6.137278763 | 5.288279049   | 2.390303560   |
| N397 | -9.166345198 | 8.611669605   | 0.849775500   |
| N398 | -9.040042695 | 10.351566006  | 2.220624530   |
| N399 | 9.355297370  | 1.695143379   | 3.401261970   |
| N400 | 6.883458535  | 6.573584106   | 0.345730826   |
| N401 | 5.103534987  | 8.004817503   | -2.332927508  |
| N402 | 2.452520636  | 7.612015409   | -3.026438986  |
| N403 | -2.206883226 | 6.615297426   | -4.646337043  |
| N404 | -2.108108853 | 8.466275978   | -6.076823708  |
| N405 | -3.336959293 | 8.573841194   | -4.116928261  |
| N406 | 1.164708222  | 6.192368053   | -0.883965632  |
| N407 | 1.507817300  | 8.064681718   | 1.164488239   |
| N408 | 0.510651832  | 10.568580656  | 0.746026149   |
| N409 | -0.714584758 | 10.449477606  | -3.064719491  |
| N410 | -1.844986973 | 11.799808610  | 1.581526006   |
| N411 | 4.425359319  | -5.060447548  | -9.841011891  |
| N412 | 2.856807165  | -2.772419978  | -7.516209990  |
| N413 | 1.991006780  | 0.132217004   | -7.021587483  |
| N414 | 4.241424032  | 1.895826821   | -6.926924436  |
| N415 | -1.073033247 | -2.846915248  | -10.140421602 |
| N416 | -2.620053273 | -0.878468480  | -8.743622147  |
| N417 | 7.812497530  | -7.809249690  | -5.244525851  |
| N418 | 3.979200106  | -5.985177866  | -3.958043017  |
| N419 | 3.477338085  | -6.932884824  | -5.885882593  |
| N420 | 8.650355397  | -8.315211875  | -2.267760834  |
| O421 | -7.183126786 | -4.529953476  | 1.126831926   |
| O422 | -7.706095241 | -2.095217472  | 3.853550629   |
| O423 | -6.103676880 | -4.523614755  | 6.195144808   |
| O424 | -3.003943500 | -3.725290818  | 4.465318983   |
| O425 | -3.123874460 | -0.282184249  | 4.922233543   |
| O426 | -3.674916453 | -0.539382770  | 8.470320992   |
| O427 | -1.552906296 | -3.917909676  | 9.434677029   |
| O428 | 1.384347171  | -3.779218646  | 6.236037557   |
| O429 | 1.949735588  | -0.145613766  | 5.811220354   |
| O430 | 1.065091644  | 1.355314389   | 9.135638351   |
| O431 | 0.983167356  | -0.670239033  | 12.003279845  |
| O432 | 5.839027578  | -10.972548972 | 2.691410183   |
| O433 | 6.650377916  | -8.314779183  | 6.386637002   |
| O434 | 10.696158006 | -5.699602375  | 5.529446206   |
| O435 | -5.706326986 | -0.331535911  | -0.383296760  |
| O436 | -3.868680190 | -4.127187541  | -4.283001501  |
| O437 | -6.779110340 | 3.141450822   | -0.959617532  |
| O438 | -5.721597277 | 3.579904557   | -3.831043075  |
| O439 | -9.737247512 | 2.432762086   | 1.467301352   |
| O440 | -5.842935808 | 1.972529809   | 4.028496864   |
| O441 | -4.167822708 | 5.416647912   | 3.539053947   |
| O442 | -6.429670500 | 7.794005719   | 4.870333507   |
| O443 | 10.239451126 | -1.164065886  | 5.226086424   |
| O444 | 3.466668852  | 4.207662833   | 4.282633291   |
| O445 | 4.312520657  | 7.984058131   | -0.193645483  |
| O446 | 2.117193723  | 9.860319026   | -3.369129289  |
| O447 | -0.758706591 | 7.204292743   | -1.598106096  |
| O448 | -0.418453128 | 7.290624842   | 2.144591470   |
| O449 | 2.562729380  | 5.486404105   | 1.866907148   |
| O450 | 1.688635967  | 11.435667820  | 2.514032718   |
| O451 | -1.269467772 | 13.757068968  | 0.563286327   |
| O452 | -2.158422302 | 11.291258174  | -1.506069391  |
| O453 | -3.991585474 | 14.110775351  | 3.300960551   |
| O454 | -4.747442098 | 7.311368114   | -1.711971098  |
| O455 | 2.023294784  | -4.665033788  | -8.518463538  |
| O456 | 0.432460897  | -0.726573052  | -8.465166883  |
| O457 | 3.055587332  | 3.487689277   | -8.036776767  |

|                                                                                                                                                                                                                                                      |      |              |                             |              |
|------------------------------------------------------------------------------------------------------------------------------------------------------------------------------------------------------------------------------------------------------|------|--------------|-----------------------------|--------------|
|                                                                                                                                                                                                                                                      | O458 | 6.871689357  | 3.885828611                 | -8.383204860 |
|                                                                                                                                                                                                                                                      | O459 | -4.425601883 | -2.173627259                | -9.252042323 |
|                                                                                                                                                                                                                                                      | O460 | -1.591395453 | -6.469608283                | -6.107138772 |
|                                                                                                                                                                                                                                                      | O461 | 0.441857111  | -5.759746040                | -6.688333037 |
|                                                                                                                                                                                                                                                      | O462 | -2.954865787 | 2.664737729                 | -8.629787771 |
|                                                                                                                                                                                                                                                      | O463 | 9.604238216  | -6.336365923                | -2.821318823 |
|                                                                                                                                                                                                                                                      | O464 | 12.016299457 | -8.129097066                | -1.042515855 |
|                                                                                                                                                                                                                                                      | O465 | -0.263908670 | -6.151483969                | -1.272803181 |
|                                                                                                                                                                                                                                                      | O466 | -1.073583195 | -7.144736585                | 0.575744718  |
|                                                                                                                                                                                                                                                      | O467 | 4.247316588  | -11.297601229               | -2.897800523 |
|                                                                                                                                                                                                                                                      | O468 | 2.003163865  | -11.090324829               | -3.101024832 |
|                                                                                                                                                                                                                                                      | O469 | 4.495539228  | -6.193662465                | -0.863468617 |
|                                                                                                                                                                                                                                                      | O470 | 4.185410930  | -7.913755615                | 0.549547200  |
|                                                                                                                                                                                                                                                      | O471 | 2.095531076  | -6.257379721                | -1.854818603 |
|                                                                                                                                                                                                                                                      | O472 | 8.141169720  | -7.440285735                | 1.757168370  |
|                                                                                                                                                                                                                                                      | O473 | 6.527760981  | -5.259142521                | 0.883619415  |
|                                                                                                                                                                                                                                                      | O474 | -3.731057248 | 5.113980005                 | -2.739272360 |
|                                                                                                                                                                                                                                                      | O475 | 6.807657844  | -11.161821853               | -1.863275060 |
|                                                                                                                                                                                                                                                      | O476 | 6.550791444  | -9.368826273                | 0.544854407  |
|                                                                                                                                                                                                                                                      | S477 | 4.020970849  | 4.621601175                 | -1.856235739 |
|                                                                                                                                                                                                                                                      | S478 | 2.380190287  | 1.682855102                 | -3.162586939 |
|                                                                                                                                                                                                                                                      | S479 | 1.986864254  | -3.384020503                | -3.440313674 |
|                                                                                                                                                                                                                                                      | S480 | 3.421955549  | 1.437890636                 | 0.331674514  |
|                                                                                                                                                                                                                                                      | S481 | 0.463740216  | -1.022824403                | -1.036384223 |
|                                                                                                                                                                                                                                                      | S482 | 4.509200250  | -1.032752341                | -5.047884097 |
|                                                                                                                                                                                                                                                      | S483 | 2.974703298  | -3.773546519                | 0.176352430  |
|                                                                                                                                                                                                                                                      | S484 | 5.887755784  | 1.283157408                 | -2.275940412 |
|                                                                                                                                                                                                                                                      | S485 | 5.570445097  | -3.631967688                | -2.529111253 |
|                                                                                                                                                                                                                                                      | S486 | 6.012332647  | -1.460957432                | 0.402221897  |
|                                                                                                                                                                                                                                                      | end  |              |                             |              |
| <b>rest-S2BH</b><br><b>2N2 associated</b><br><b>35, S=1/2</b><br><br><b>Fe( 139) -2.108</b><br><b>Fe( 140) -1.639</b><br><b>Fe( 141) -2.770</b><br><b>Fe( 142) 2.698</b><br><b>Fe( 143) 2.887</b><br><b>Fe( 144) 2.254</b><br><b>Fe( 145) -0.733</b> |      |              | <b>bm522n2x2bhdtb.car_3</b> |              |
|                                                                                                                                                                                                                                                      | C1   | -7.516922833 | -4.988135847                | 3.232496463  |
|                                                                                                                                                                                                                                                      | C2   | -7.966798162 | -6.325270903                | 2.633052365  |
|                                                                                                                                                                                                                                                      | C3   | -8.243641371 | -2.798398235                | 4.069883380  |
|                                                                                                                                                                                                                                                      | C4   | -7.419981938 | -2.707274532                | 5.350991423  |
|                                                                                                                                                                                                                                                      | C5   | -6.760815726 | -3.760528373                | 7.454505909  |
|                                                                                                                                                                                                                                                      | C6   | -5.248921955 | -3.874072460                | 7.235864505  |
|                                                                                                                                                                                                                                                      | C7   | -3.431603071 | -4.562939741                | 5.757651998  |
|                                                                                                                                                                                                                                                      | C8   | -2.905600823 | -3.199325906                | 5.304755924  |
|                                                                                                                                                                                                                                                      | C9   | -3.394818091 | -1.118391900                | 4.120653092  |
|                                                                                                                                                                                                                                                      | C10  | -3.192082769 | -0.162039831                | 5.306426075  |
|                                                                                                                                                                                                                                                      | C11  | -4.027541491 | 0.656537076                 | 7.436582491  |
|                                                                                                                                                                                                                                                      | C12  | -2.916909370 | 0.310513213                 | 8.436445422  |
|                                                                                                                                                                                                                                                      | C13  | -1.912673620 | -1.414152910                | 9.856963208  |
|                                                                                                                                                                                                                                                      | C14  | -0.499254339 | -1.818784218                | 9.417296402  |
|                                                                                                                                                                                                                                                      | C15  | 0.851427461  | -2.904061287                | 7.665319324  |
|                                                                                                                                                                                                                                                      | C16  | 1.575044599  | -2.045629539                | 6.622661869  |
|                                                                                                                                                                                                                                                      | C17  | 1.359636150  | -0.462489089                | 4.731934691  |
|                                                                                                                                                                                                                                                      | C18  | 1.712075935  | 0.922660597                 | 5.327951278  |
|                                                                                                                                                                                                                                                      | C19  | 0.432729200  | -0.375501566                | 3.506509446  |
|                                                                                                                                                                                                                                                      | C20  | 0.988029031  | 0.623042161                 | 2.485452972  |
|                                                                                                                                                                                                                                                      | C21  | 0.234181531  | -1.771190451                | 2.903825174  |
|                                                                                                                                                                                                                                                      | C22  | 0.866205030  | 2.965046128                 | 6.436787448  |
|                                                                                                                                                                                                                                                      | C23  | 1.335018239  | 2.936666209                 | 7.907761104  |
|                                                                                                                                                                                                                                                      | C24  | -0.410946122 | 3.820381165                 | 6.239268937  |
|                                                                                                                                                                                                                                                      | C25  | -0.275764481 | 5.184512376                 | 6.926011918  |
|                                                                                                                                                                                                                                                      | C26  | -0.719720620 | 4.001420976                 | 4.748007959  |
|                                                                                                                                                                                                                                                      | C27  | 0.913568387  | 2.275756262                 | 10.208587331 |
|                                                                                                                                                                                                                                                      | C28  | 2.355244598  | 1.891188726                 | 10.475380104 |
|                                                                                                                                                                                                                                                      | C29  | 6.522664825  | -10.324296521               | 5.999473040  |
|                                                                                                                                                                                                                                                      | C30  | 6.997179193  | -9.222950798                | 5.054340313  |
|                                                                                                                                                                                                                                                      | C31  | 7.201238190  | -6.743989113                | 4.846827965  |
|                                                                                                                                                                                                                                                      | C32  | 8.473696759  | -6.171634388                | 5.500783855  |
|                                                                                                                                                                                                                                                      | C33  | 6.040284468  | -5.736814018                | 4.905945883  |
|                                                                                                                                                                                                                                                      | C34  | 6.351788759  | -4.413216986                | 4.204989435  |
|                                                                                                                                                                                                                                                      | C35  | 5.089325791  | -3.572833948                | 4.017457844  |
|                                                                                                                                                                                                                                                      | C36  | 5.081446538  | -1.097317205                | 3.571063935  |
|                                                                                                                                                                                                                                                      | C37  | 10.737599615 | -5.331392160                | 5.102074275  |
|                                                                                                                                                                                                                                                      | C38  | 10.957837902 | -3.881149616                | 4.732069170  |
|                                                                                                                                                                                                                                                      | C39  | -5.417257119 | -3.033979255                | -0.402447043 |
|                                                                                                                                                                                                                                                      | C40  | -5.755652193 | -1.535028334                | -0.302253682 |
|                                                                                                                                                                                                                                                      | C41  | -3.879876358 | -3.176382310                | -0.423342699 |
|                                                                                                                                                                                                                                                      | C42  | -3.332470833 | -4.608199855                | -0.252430136 |
|                                                                                                                                                                                                                                                      | C43  | -3.163188612 | -5.408334737                | -1.544061768 |
|                                                                                                                                                                                                                                                      | C44  | -6.326733955 | 0.425736848                 | -1.683866555 |
|                                                                                                                                                                                                                                                      | C45  | -7.351946309 | 1.104870033                 | -0.765405674 |
|                                                                                                                                                                                                                                                      | C46  | -6.602004492 | 0.679086901                 | -3.171293387 |
|                                                                                                                                                                                                                                                      | C47  | -9.413503556 | 0.855716752                 | 0.532548371  |
|                                                                                                                                                                                                                                                      | C48  | -8.897037704 | 1.214175602                 | 1.930201117  |
|                                                                                                                                                                                                                                                      | C49  | -7.066091168 | 1.070695178                 | 3.552807773  |
|                                                                                                                                                                                                                                                      | C50  | -5.893962573 | 2.046359435                 | 3.458832860  |

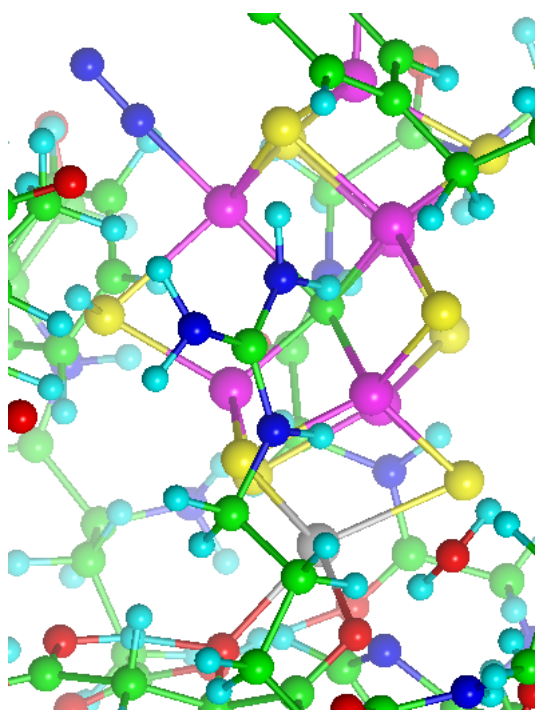

|      |               |              |              |
|------|---------------|--------------|--------------|
| C51  | -4.505433065  | 3.512929238  | 2.084830105  |
| C52  | -4.949738873  | 4.934252896  | 2.500882078  |
| C53  | -4.015895803  | 3.636894828  | 0.634529539  |
| C54  | -3.416636689  | 2.414841807  | 0.022595695  |
| C55  | -2.838479891  | 1.277131232  | 0.529653215  |
| C56  | -2.766522755  | 1.136810199  | -1.688997420 |
| C57  | -6.801021494  | 6.555663369  | 2.375088536  |
| C58  | -6.621688147  | 7.039792522  | 3.812747106  |
| C59  | -8.299971089  | 6.488099104  | 1.997560840  |
| C60  | -8.961440201  | 7.788245628  | 1.647477596  |
| C61  | -8.852731613  | 9.039681177  | 2.223591770  |
| C62  | -10.291747854 | 9.086379082  | 0.539106968  |
| C63  | 9.366424133   | 2.382662953  | 2.401504465  |
| C64  | 10.407628971  | 1.278889134  | 2.396191043  |
| C65  | 7.976493903   | 1.697117986  | 2.451779720  |
| C66  | 6.832870147   | 2.682377974  | 2.497885229  |
| C67  | 6.332073101   | 3.163089214  | 3.720398722  |
| C68  | 6.234825227   | 3.148422706  | 1.313012871  |
| C69  | 5.259650428   | 4.061119303  | 3.765354616  |
| C70  | 5.175594096   | 4.056777272  | 1.341799915  |
| C71  | 4.685184812   | 4.507646714  | 2.569924106  |
| C72  | 4.991698739   | 6.382451277  | -3.229435244 |
| C73  | 3.907664519   | 7.410603600  | -3.595553439 |
| C74  | 4.362829411   | 5.200740560  | -2.491616655 |
| C75  | 2.721662040   | 8.547547284  | -5.442725687 |
| C76  | 1.254301105   | 8.110933466  | -5.433379594 |
| C77  | -0.303614587  | 6.261310714  | -4.813493848 |
| C78  | -0.686925546  | 6.228408723  | -3.311826814 |
| C79  | -0.276590190  | 4.846287828  | -5.444352729 |
| C80  | -1.498756376  | 3.930852740  | -5.297005641 |
| C81  | -2.718671781  | 4.254591421  | -6.172769251 |
| C82  | -4.246476743  | 6.222141205  | -6.021645159 |
| C83  | -0.004236400  | 5.866195667  | -0.989355843 |
| C84  | -0.123979743  | 7.272240165  | -0.383330916 |
| C85  | 1.050527808   | 5.094698002  | -0.169247247 |
| C86  | 1.014085186   | 9.435031448  | -0.209197384 |
| C87  | 0.352879723   | 10.679086820 | -0.780184817 |
| C88  | -1.166346620  | 11.565768174 | -2.469718857 |
| C89  | -2.389114987  | 12.271522465 | -1.832357461 |
| C90  | -1.442338544  | 11.220723140 | -3.936190865 |
| C91  | -2.616704508  | 10.273405089 | -4.147355259 |
| C92  | -4.239624205  | 12.104562921 | -0.228472506 |
| C93  | -4.107281114  | 13.423599048 | 0.519334313  |
| C94  | -4.814447311  | 11.008075606 | 0.713266668  |
| C95  | -5.104351049  | 9.718099248  | -0.021750120 |
| C96  | -6.345057239  | 9.524011445  | -0.648326019 |
| C97  | -4.134135650  | 8.711577642  | -0.155170333 |
| C98  | -6.605101273  | 8.379142668  | -1.405735398 |
| C99  | -4.364540828  | 7.572835992  | -0.934695395 |
| C100 | -5.600536839  | 7.422739197  | -1.557192228 |
| C101 | 3.474915908   | -5.867844886 | -8.070325626 |
| C102 | 2.097402603   | -5.514565212 | -7.538938978 |
| C103 | 0.738160970   | -3.730268048 | -6.473017882 |
| C104 | 0.152975922   | -2.552211102 | -7.258162168 |
| C105 | 0.451859744   | -0.177292128 | -7.814304561 |
| C106 | 1.581059540   | 0.737524664  | -8.280375311 |
| C107 | 3.906772505   | 1.443979178  | -8.149212155 |
| C108 | 4.302070361   | 1.423741633  | -9.612430263 |
| C109 | -3.310775465  | -5.540921024 | -7.845012996 |
| C110 | -4.342664330  | -4.413942935 | -7.710103301 |
| C111 | -2.750420755  | -5.902778550 | -6.450298336 |
| C112 | -2.026881589  | -7.262278261 | -6.472829116 |
| C113 | -1.255404498  | -7.471372445 | -5.189637449 |
| C114 | -4.752844865  | -2.005444320 | -7.568010729 |
| C115 | -4.339662548  | -0.892205586 | -8.510114196 |
| C116 | -5.007555687  | -1.557054270 | -6.108002782 |
| C117 | -3.732759210  | -1.411962992 | -5.318400439 |
| C118 | -2.954545155  | -0.244465070 | -5.401784237 |
| C119 | -3.250414614  | -2.491148250 | -4.556170829 |
| C120 | -1.702379480  | -0.177450585 | -4.780008972 |
| C121 | -1.997500486  | -2.426374717 | -3.937396432 |
| C122 | -1.212335889  | -1.275864565 | -4.063289383 |
| C123 | 7.629984141   | -7.107348688 | -3.743045147 |
| C124 | 8.885979481   | -6.963421341 | -2.868060778 |
| C125 | 6.378645892   | -7.245363564 | -2.860101632 |
| C126 | 5.060056276   | -7.225729221 | -3.565000789 |
| C127 | 4.617588958   | -8.099759511 | -4.537015152 |
| C128 | 2.934092077   | -6.818609540 | -3.889365438 |
| C129 | 10.259466936  | -7.786761426 | -1.048044065 |
| C130 | 11.552199343  | -7.663747446 | -1.823490386 |
| C131 | 0.683345508   | -6.600778964 | 1.414598382  |
| C132 | 2.195387549   | -6.600491435 | 1.605969592  |

|       |              |               |              |
|-------|--------------|---------------|--------------|
| C133  | 3.011438376  | -7.027176681  | 0.350531744  |
| C134  | 2.905363620  | -8.561613082  | 0.140850943  |
| C135  | 3.890686744  | -9.156218046  | -0.867303498 |
| C136  | 3.897246325  | -10.700971510 | -0.923302121 |
| C137  | 4.488920691  | -6.665859699  | 0.584680331  |
| C138  | 3.379848738  | -1.184486578  | -2.161965662 |
| Fe139 | 3.653444342  | -2.748345297  | -3.426169521 |
| Fe140 | 1.833473978  | 0.247964772   | -1.775370048 |
| Fe141 | 4.722653195  | 0.231713955   | -1.632794191 |
| Fe142 | 3.545473665  | -0.256584547  | -3.919278496 |
| Fe143 | 3.408634467  | 2.175270800   | -2.817690920 |
| Fe144 | 4.719205759  | -2.283331243  | -1.106426874 |
| Fe145 | 2.223293595  | -2.436204454  | -1.367576157 |
| H146  | -6.172436346 | -7.294490122  | 2.688718415  |
| H147  | -6.506947193 | -6.628488131  | 1.236962984  |
| H148  | -9.483658820 | -4.400305447  | 3.394290848  |
| H149  | -8.763691462 | -6.128412616  | 1.897691639  |
| H150  | -8.443363854 | -6.900625381  | 3.445327501  |
| H151  | -7.686453470 | -2.242842710  | 3.301191802  |
| H152  | -8.162013035 | -4.501772680  | 6.000380047  |
| H153  | -9.199657321 | -2.283806876  | 4.234126881  |
| H154  | -7.094841419 | -4.616085367  | 8.056699044  |
| H155  | -5.527514043 | -4.820737044  | 5.423787894  |
| H156  | -6.925234559 | -2.846558254  | 8.040803349  |
| H157  | -2.461326823 | -1.115859333  | 3.544976633  |
| H158  | -4.643251452 | -2.855984343  | 4.259409684  |
| H159  | -3.294509015 | -5.288661902  | 4.943984726  |
| H160  | -3.839781430 | 1.680051771   | 7.088511855  |
| H161  | -4.930928988 | -0.839854123  | 6.179775909  |
| H162  | -2.821626280 | -4.882589560  | 6.611140609  |
| H163  | -4.201468485 | -0.746701652  | 3.473823295  |
| H164  | -3.502164729 | -1.674110415  | 8.449227259  |
| H165  | -4.994383824 | 0.636137343   | 7.958374666  |
| H166  | -0.086552771 | -2.501302897  | 3.659586491  |
| H167  | -0.539535181 | -1.758286684  | 2.121001811  |
| H168  | 1.167055555  | -2.140512846  | 2.447972338  |
| H169  | -0.539856193 | 0.005855278   | 3.860791602  |
| H170  | -2.355756423 | -2.277480208  | 10.373914564 |
| H171  | -0.864311415 | 3.039923609   | 4.236006848  |
| H172  | -0.321558929 | 1.827003411   | 8.536091186  |
| H173  | -0.130472499 | 5.096792150   | 8.012355138  |
| H174  | 0.281429236  | 0.758831791   | 1.653415273  |
| H175  | 1.947507033  | 0.285154877   | 2.064060284  |
| H176  | 9.497515485  | 2.960325905   | 3.336637274  |
| H177  | -1.639651878 | 4.590960223   | 4.620547449  |
| H178  | -1.185826659 | 5.778323714   | 6.755936638  |
| H179  | 0.099548381  | 4.543237604   | 4.247722857  |
| H180  | 0.577034334  | 5.749151719   | 6.516619136  |
| H181  | -1.253315346 | 3.280188101   | 6.708540041  |
| H182  | 1.700180130  | 3.433148432   | 5.895245011  |
| H183  | -0.259484482 | 1.236087090   | 5.836951593  |
| H184  | 1.149665208  | 1.618672050   | 2.924260557  |
| H185  | 1.321910910  | 4.174183843   | -0.707325868 |
| H186  | 0.571953328  | 4.814652629   | 0.782150861  |
| H187  | 2.583133955  | 5.657250434   | 0.935296527  |
| H188  | 3.359144934  | 5.615625597   | 3.455185354  |
| H189  | 4.708098957  | 4.392529427   | 0.415557587  |
| H190  | 6.579308106  | 2.767829352   | 0.348923638  |
| H191  | 6.772327469  | 2.818801048   | 4.660207778  |
| H192  | -0.217307085 | -1.461040857  | 5.801922387  |
| H193  | 0.671321906  | -3.892215346  | 7.213036659  |
| H194  | 1.546149011  | -3.032872407  | 8.503629615  |
| H195  | -1.233015166 | -2.492692734  | 7.604339254  |
| H196  | -1.793894858 | -0.600740604  | 10.583684736 |
| H197  | 4.862367196  | 4.397689615   | 4.726557568  |
| H198  | 2.315779063  | -0.902137680  | 4.424304131  |
| H199  | 0.719343274  | 3.260482329   | 10.664698089 |
| H200  | 0.281456150  | 1.531930968   | 10.718398538 |
| H201  | 2.818036415  | 1.220071997   | 9.716041297  |
| H202  | 11.581991148 | -5.936296060  | 4.737806976  |
| H203  | -1.965352882 | -6.818376922  | -2.419455565 |
| H204  | 1.189630171  | -6.183060395  | -0.404557339 |
| H205  | -2.768509978 | -8.068511692  | -6.564905149 |
| H206  | -1.348603522 | -7.314623987  | -7.337322015 |
| H207  | -3.565767394 | -5.942912439  | -5.711667601 |
| H208  | -3.861827892 | -1.244702030  | -9.453496600 |
| H209  | -3.909681356 | -6.396703177  | -8.193676139 |
| H210  | -3.500464636 | -2.738102146  | -1.360926486 |
| H211  | -4.001993400 | -5.193491508  | 0.401396114  |
| H212  | -2.847762652 | -2.973862227  | -7.769127576 |
| H213  | -5.725578153 | -2.351361099  | -7.974676966 |
| H214  | -1.620585419 | -4.576453827  | -8.569481766 |

|      |               |              |              |
|------|---------------|--------------|--------------|
| H215 | -1.392144136  | -6.263287809 | -0.847908067 |
| H216 | -2.068111532  | -5.102885214 | -6.122735250 |
| H217 | -1.827510902  | -6.104141451 | -9.146964116 |
| H218 | -6.921924374  | -4.081378203 | -1.354979527 |
| H219 | -3.492605409  | -2.565815581 | 0.405958219  |
| H220 | 0.355615112   | -6.842275522 | -6.124704193 |
| H221 | -2.365986034  | -4.565340702 | 0.270860253  |
| H222 | -3.680333920  | 3.244359607  | 2.759514665  |
| H223 | -2.670400652  | 0.963433327  | 1.552471012  |
| H224 | -7.830708329  | 1.556382349  | 4.175646952  |
| H225 | -7.156411071  | 0.107431496  | 1.650112740  |
| H226 | -6.868907255  | 4.458707863  | 1.946621125  |
| H227 | -8.253465990  | 9.417545791  | 3.044727289  |
| H228 | -6.728198117  | 6.230313564  | 4.575207281  |
| H229 | -8.850176670  | 5.973555873  | 2.805619982  |
| H230 | -6.269859521  | 7.248699023  | 1.703734932  |
| H231 | -11.011455982 | 9.488451854  | -0.168597217 |
| H232 | -3.275400114  | 4.453269925  | 0.614441346  |
| H233 | -4.860984550  | 3.957306503  | 0.004864951  |
| H234 | -9.860677540  | 10.841249377 | 1.664617147  |
| H235 | -8.383653106  | 5.844658219  | 1.107374889  |
| H236 | -6.108670716  | 2.248008167  | 1.396666805  |
| H237 | -6.724698012  | 0.182384446  | 4.104946388  |
| H238 | -9.881702805  | 1.767894438  | 0.137159844  |
| H239 | -2.555225761  | 0.772272833  | -2.691499035 |
| H240 | -10.197933688 | 0.095751166  | 0.638978575  |
| H241 | 10.334614680  | 3.777053900  | 1.255234472  |
| H242 | 8.709856530   | 3.797516000  | 1.075636723  |
| H243 | 1.181772903   | 5.472328488  | -2.748236669 |
| H244 | -0.979491830  | 5.382763587  | -0.837488908 |
| H245 | 1.440232776   | 7.874590330  | -1.564170396 |
| H246 | -3.768131808  | 2.991339884  | -2.034266459 |
| H247 | -5.442423635  | 3.355419714  | -3.222612573 |
| H248 | -7.036077379  | 2.217221697  | -4.305574872 |
| H249 | -5.106736270  | 4.787489102  | -2.613760310 |
| H250 | -5.798484762  | 0.201144394  | -3.755844492 |
| H251 | -7.563231010  | 0.225169107  | -3.457862681 |
| H252 | -0.522339848  | 10.843623847 | -4.404977172 |
| H253 | -1.706880849  | 12.163554049 | -4.439867152 |
| H254 | -1.474662072  | 9.107820429  | -5.433348703 |
| H255 | -3.148983711  | 8.609584861  | -5.162476926 |
| H256 | -4.403176379  | 7.462964769  | -7.651084506 |
| H257 | -3.233673859  | 3.323014073  | -6.453744696 |
| H258 | -7.582409432  | 8.237073566  | -1.874938204 |
| H259 | -3.171676938  | 8.789669128  | 0.358049544  |
| H260 | -5.066515854  | 6.837580739  | -4.235303768 |
| H261 | 0.582188982   | 4.311701545  | -5.007714311 |
| H262 | 1.828296032   | 6.264570299  | -4.795466317 |
| H263 | -1.806385021  | 3.849522003  | -4.242209647 |
| H264 | -8.455290864  | -0.613102345 | -0.708602833 |
| H265 | 2.991714893   | 8.808133521  | -6.474599527 |
| H266 | -6.290120999  | -1.719300718 | -2.214189197 |
| H267 | -0.044654969  | 4.974246521  | -6.514288520 |
| H268 | -3.572385753  | 6.836847955  | -1.079162681 |
| H269 | 2.768556250   | 9.466637649  | -4.841204175 |
| H270 | -3.721123582  | 5.903986916  | -7.993029585 |
| H271 | -5.647947096  | 7.660796660  | -5.641772219 |
| H272 | -5.405157657  | -4.310078221 | -2.020529124 |
| H273 | -5.782320712  | -3.485447907 | 0.538950873  |
| H274 | -7.129238096  | 10.276862832 | -0.542809023 |
| H275 | -5.377719934  | 0.908184596  | -1.414450440 |
| H276 | -1.046604376  | 6.900893456  | -5.301193282 |
| H277 | -2.382124683  | 4.726011247  | -7.105577706 |
| H278 | -1.162324792  | 2.925944443  | -5.590920600 |
| H279 | -4.018637591  | 4.809069366  | -4.574762608 |
| H280 | 0.695359716   | 9.338829265  | 0.839480826  |
| H281 | -0.740299758  | 9.497722355  | -2.037741528 |
| H282 | -0.390498336  | 12.347711216 | -2.462587489 |
| H283 | 2.098629903   | 9.610761776  | -0.220306982 |
| H284 | -2.643538575  | 10.721037861 | -0.553054935 |
| H285 | 3.956882749   | -4.970101589 | -8.484526336 |
| H286 | 4.069987759   | -6.169596759 | -7.183235562 |
| H287 | 7.568052769   | -6.167358066 | -4.310806215 |
| H288 | 4.305182891   | -7.286233857 | -9.274731478 |
| H289 | 2.804668386   | -7.667356378 | -8.741363412 |
| H290 | 5.167972069   | 4.498402078  | -2.237843510 |
| H291 | 5.584948626   | 7.433597864  | -1.580513063 |
| H292 | 4.231770568   | 7.047412779  | -5.594050798 |
| H293 | 3.876333998   | 5.551475009  | -1.569989386 |
| H294 | 6.526481809   | 7.707491755  | -2.890981907 |
| H295 | 4.792161105   | 1.155635237  | -7.561091785 |
| H296 | 5.472191202   | 6.013685718  | -4.149223739 |

|       |              |               |               |
|-------|--------------|---------------|---------------|
| H297  | 5.775589019  | -5.558940707  | 5.961997774   |
| H298  | 7.401279866  | -7.002012910  | 3.799309483   |
| H299  | 3.048662956  | -0.245073892  | -7.172010371  |
| H300  | 5.144780506  | 0.830571820   | 2.900237013   |
| H301  | 0.544190434  | -1.029711318  | 0.446989900   |
| H302  | -0.125140843 | -0.470683296  | -8.700431119  |
| H303  | -1.625680511 | -3.280937463  | -3.367340607  |
| H304  | -0.215813709 | 0.446508601   | -7.195911417  |
| H305  | 4.653705932  | -3.294763524  | 4.984818404   |
| H306  | 1.558387030  | -1.363822318  | -6.380768160  |
| H307  | 4.324014727  | -4.165082563  | 3.489155342   |
| H308  | 5.173567368  | -6.218076064  | 4.424165351   |
| H309  | 6.785595675  | -4.606458907  | 3.212270751   |
| H310  | 7.092181459  | -3.830180291  | 4.775919124   |
| H311  | -5.657412353 | -2.309895912  | -5.638941187  |
| H312  | 6.469884283  | -7.935629579  | 6.490284493   |
| H313  | 5.595731140  | -10.721229798 | 5.557488193   |
| H314  | -0.219545538 | -1.227033130  | -3.614838127  |
| H315  | 7.083040526  | -9.927633030  | 7.941537065   |
| H316  | 5.531583785  | -10.433332756 | 7.799341257   |
| H317  | 5.641776813  | -2.527637768  | 2.261046270   |
| H318  | -1.085491570 | 0.720949598   | -4.858595879  |
| H319  | -3.852218229 | -3.396305577  | -4.451687278  |
| H320  | 7.674296266  | -10.036550251 | 0.141933369   |
| H321  | 6.440632128  | -8.197711823  | -2.305551761  |
| H322  | 6.728151059  | -7.971629169  | 1.330849207   |
| H323  | 6.725887062  | -10.857776118 | -0.769757127  |
| H324  | 4.015009892  | 0.497453473   | -10.165217197 |
| H325  | 6.448100609  | -4.917064764  | 0.438192198   |
| H326  | 2.452051336  | -7.225922197  | 2.469226369   |
| H327  | 2.766804906  | -3.635495263  | -7.073098495  |
| H328  | 3.078765087  | -9.025999402  | 1.124132292   |
| H329  | 2.643024905  | -8.329866327  | -5.331853147  |
| H330  | 1.923934195  | -6.438423410  | -3.809046994  |
| H331  | 7.270192512  | -11.133439572 | 5.941139539   |
| H332  | 5.373087563  | -0.368928728  | 1.653735842   |
| H333  | 8.532785273  | -5.468894003  | 1.449901956   |
| H334  | 7.387760726  | -3.727327769  | 0.101364906   |
| H335  | 9.335348573  | -5.996608873  | 3.610553412   |
| H336  | 4.516784883  | -1.450861493  | 5.504668527   |
| H337  | 3.646143738  | -8.798881624  | -1.878669787  |
| H338  | 4.913341123  | -8.819967396  | -0.649645949  |
| H339  | 1.872290783  | -8.805539929  | -0.150795003  |
| H340  | 0.968836465  | -3.435349658  | -5.437318613  |
| H341  | -3.322784228 | 0.600427801   | -5.989786498  |
| H342  | -5.560149479 | -0.606020966  | -6.154460574  |
| H343  | 2.462700492  | -5.560826475  | 1.862248456   |
| H344  | 8.666725014  | -7.008369344  | 1.633113645   |
| H345  | 7.576954941  | -8.834269275  | 2.299043810   |
| H346  | 4.247764636  | 0.133366197   | 4.962080203   |
| H347  | 5.131802284  | -8.893548961  | -5.064213298  |
| H348  | 6.386715656  | -6.453565265  | -2.101177824  |
| H349  | -0.002656114 | -4.532497603  | -6.459405959  |
| H350  | 3.636677175  | 2.472439254   | -7.863793339  |
| H351  | 7.953673622  | 1.051694752   | 3.342706602   |
| H352  | 7.875851739  | 1.048578367   | 1.566206266   |
| H353  | 8.574925741  | -8.057054834  | -5.295175644  |
| H354  | 7.890604425  | -9.095210343  | -4.232107941  |
| H355  | 10.325575412 | -8.705533149  | -0.444689247  |
| H356  | 8.455677327  | -8.686024746  | -1.744851345  |
| H357  | 11.537682382 | -8.130101638  | -2.837992832  |
| H358  | 10.160711712 | -6.939999605  | -0.349960264  |
| H359  | 10.562196721 | 0.801562626   | 1.398385457   |
| H360  | -3.069330325 | 13.692978424  | 0.826285977   |
| H361  | 10.732889566 | -5.382825213  | 6.204849097   |
| H362  | 10.023099775 | -3.287790785  | 4.575803736   |
| H363  | -4.947174857 | 12.265724947  | -1.059422738  |
| H364  | -4.101799162 | 10.833603141  | 1.534920917   |
| H365  | -5.735705459 | 11.410236412  | 1.158823605   |
| H366  | -6.754468834 | 6.224904246   | -2.575001938  |
| H367  | -1.868237077 | -0.342610867  | -0.527502851  |
| Mo368 | 3.660479298  | -4.695295680  | -1.574509741  |
| N369  | -6.929181526 | -7.134628617  | 2.018986117   |
| N370  | -8.524308651 | -4.156179001  | 3.628556459   |
| N371  | -7.539534265 | -3.730116802  | 6.228729073   |
| N372  | -4.839812961 | -4.532076460  | 6.121867424   |
| N373  | -3.736466212 | -2.473749451  | 4.520321511   |
| N374  | -4.105648641 | -0.248366016  | 6.300724476   |
| N375  | -2.827401480 | -0.992180807  | 8.807067045   |
| N376  | -0.398185866 | -2.376127938  | 8.180044871   |
| N377  | 0.795437011  | -1.335112693  | 5.766900826   |
| N378  | 0.687018589  | 1.622594767   | 5.876251759   |

|      |              |              |               |
|------|--------------|--------------|---------------|
| N379 | 0.577698036  | 2.241872502  | 8.794051532   |
| N380 | 6.245227618  | -9.849367404 | 7.360806318   |
| N381 | 6.826544898  | -7.973805825 | 5.529524887   |
| N382 | 5.347363263  | -2.365950414 | 3.226333635   |
| N383 | 0.564706509  | 1.490431094  | -1.287368608  |
| N384 | -0.179582165 | 2.297202586  | -1.024731317  |
| N385 | 4.803332475  | -0.732217319 | 4.839027509   |
| N386 | 5.084138872  | -0.145597885 | 2.619659621   |
| N387 | 9.469660829  | -5.855566779 | 4.636120628   |
| N388 | -6.045659415 | -3.613715579 | -1.596373379  |
| N389 | -2.103446004 | -6.236189993 | -1.586629379  |
| N390 | -6.213222485 | -1.006352534 | -1.468436001  |
| N391 | -8.414762270 | 0.354291635  | -0.395582292  |
| N392 | -7.693039778 | 0.692882727  | 2.299494816   |
| N393 | -5.563265555 | 2.520946260  | 2.219569706   |
| N394 | -3.357717785 | 2.292641422  | -1.358190206  |
| N395 | -2.458399584 | 0.503413828  | -0.550604402  |
| N396 | -6.255938425 | 5.210080813  | 2.253339049   |
| N397 | -9.862827081 | 7.831323013  | 0.595944009   |
| N398 | -9.704386044 | 9.850094616  | 1.502853431   |
| N399 | 9.514052795  | 3.171284478  | 1.174989289   |
| N400 | 6.035698808  | 6.971033595  | -2.376337956  |
| N401 | 3.678255372  | 7.584211307  | -4.931187696  |
| N402 | 1.015960804  | 6.847824436  | -5.024963358  |
| N403 | -3.688265755 | 5.128958948  | -5.502749093  |
| N404 | -4.087081306 | 6.560048543  | -7.313077185  |
| N405 | -4.932482164 | 7.072390315  | -5.221793299  |
| N406 | 0.288832454  | 5.885427226  | -2.424002544  |
| N407 | 0.719119472  | 8.202334575  | -0.916274966  |
| N408 | -0.628713216 | 10.455499483 | -1.706843810  |
| N409 | -2.423961897 | 9.322571552  | -5.101502520  |
| N410 | -2.951394992 | 11.669396451 | -0.753978092  |
| N411 | 3.374246048  | -6.898074720 | -9.106248529  |
| N412 | 1.944947198  | -4.244321258 | -7.107360035  |
| N413 | 0.825156550  | -1.388433696 | -7.105223923  |
| N414 | 2.841351212  | 0.505626676  | -7.836677289  |
| N415 | -2.325764165 | -5.248556209 | -8.893318323  |
| N416 | -3.857120911 | -3.139310744 | -7.711748815  |
| N417 | 7.741167121  | -8.206337573 | -4.719632723  |
| N418 | 3.988510393  | -6.417399036 | -3.180065534  |
| N419 | 3.282058553  | -7.822976326 | -4.725282004  |
| N420 | 9.108438581  | -7.918886553 | -1.924178307  |
| O421 | -6.321753027 | -4.680553575 | 3.391604407   |
| O422 | -6.682951366 | -1.725678357 | 5.556706713   |
| O423 | -4.459364877 | -3.394382153 | 8.065879059   |
| O424 | -1.783275264 | -2.783281573 | 5.645862367   |
| O425 | -2.242043515 | 0.637672495  | 5.326624387   |
| O426 | -2.179059403 | 1.198443301  | 8.898206164   |
| O427 | 0.451745364  | -1.680905058 | 10.198634486  |
| O428 | 2.817284367  | -2.059608643 | 6.576034944   |
| O429 | 2.878481262  | 1.361717269  | 5.288775874   |
| O430 | 2.359561823  | 3.543586158  | 8.261397239   |
| O431 | 2.956241318  | 2.228916421  | 11.484247352  |
| O432 | 7.470451541  | -9.524293365 | 3.938894393   |
| O433 | 8.542530418  | -6.018101014 | 6.732950613   |
| O434 | 12.061494321 | -3.370524406 | 4.626481322   |
| O435 | -5.604854106 | -0.867349953 | 0.739972594   |
| O436 | -3.976337258 | -5.317989817 | -2.493278113  |
| O437 | -7.176290639 | 2.273172493  | -0.374766590  |
| O438 | -6.639023361 | 2.097887929  | -3.424024557  |
| O439 | -9.583959348 | 1.940434100  | 2.660178557   |
| O440 | -5.290474987 | 2.381727623  | 4.483772512   |
| O441 | -4.145480724 | 5.768084648  | 2.924349819   |
| O442 | -6.419483989 | 8.198572182  | 4.131578803   |
| O443 | 11.028746830 | 0.912530904  | 3.382792736   |
| O444 | 3.612606289  | 5.379372548  | 2.544273520   |
| O445 | 3.278809849  | 8.047367998  | -2.733078329  |
| O446 | 0.376037271  | 8.921981483  | -5.787852061  |
| O447 | -1.844106119 | 6.511981907  | -2.961730867  |
| O448 | -0.893322360 | 7.497301880  | 0.559693909   |
| O449 | 2.210646392  | 5.897577761  | 0.061976682   |
| O450 | 0.685155415  | 11.808809638 | -0.401919941  |
| O451 | -2.776763224 | 13.361909677 | -2.274339729  |
| O452 | -3.686011925 | 10.408033613 | -3.534107576  |
| O453 | -5.064096001 | 14.129846261 | 0.793991802   |
| O454 | -5.798937396 | 6.297143782  | -2.384671905  |
| O455 | 1.191243429  | -6.380612785 | -7.486944390  |
| O456 | -0.846982656 | -2.680510464 | -7.993465928  |
| O457 | 1.304550401  | 1.690764720  | -9.026959901  |
| O458 | 4.920016658  | 2.327602787  | -10.149708646 |
| O459 | -5.554050182 | -4.657172720 | -7.581226167  |
| O460 | -1.770203457 | -7.865724453 | -4.148236682  |



|      |              |               |              |
|------|--------------|---------------|--------------|
| O461 | 0.052665149  | -7.145820612  | -5.213795177 |
| O462 | -4.543151929 | 0.297239665   | -8.311450785 |
| O463 | 9.696908211  | -6.032417758  | -3.035467557 |
| O464 | 12.570681935 | -7.163828782  | -1.366525571 |
| O465 | 0.274435981  | -6.261693769  | 0.185938107  |
| O466 | -0.107843695 | -6.833568758  | 2.326927385  |
| O467 | 5.035036812  | -11.272674121 | -1.065849863 |
| O468 | 2.782218197  | -11.292388475 | -0.863630273 |
| O469 | 5.012215213  | -5.812261517  | -0.254189091 |
| O470 | 5.124351589  | -7.185959795  | 1.520972501  |
| O471 | 2.506658411  | -6.296864571  | -0.774103961 |
| O472 | 9.137999166  | -6.153343337  | 1.830811144  |
| O473 | 7.171631843  | -4.353123234  | 0.817132030  |
| O474 | -4.704643471 | 4.005834130   | -3.069742084 |
| O475 | 7.698118204  | -10.711524284 | -0.573097602 |
| O476 | 7.605956704  | -8.429340655  | 1.393903022  |
| S477 | 3.098164590  | 4.325620176   | -3.520616545 |
| S478 | 1.707400731  | 1.043294770   | -3.903528080 |
| S479 | 1.818939187  | -3.915364704  | -2.929016580 |
| S480 | 3.327642238  | 1.682590181   | -0.645309226 |
| S481 | 0.335807313  | -1.429224055  | -0.832507132 |
| S482 | 3.755774677  | -1.859623814  | -5.443084403 |
| S483 | 3.322599399  | -3.248187348  | 0.345340251  |
| S484 | 5.305848527  | 1.149265838   | -3.572650505 |
| S485 | 5.527572518  | -3.674583614  | -2.639541153 |
| S486 | 6.223421269  | -0.849348064  | -0.415738848 |
| end  |              |               |              |

| <b>rest-S2BH</b>       |  | <b>bm522n2x2bhdtf.car_5</b> |              |               |              |
|------------------------|--|-----------------------------|--------------|---------------|--------------|
| <b>2N2 dissociated</b> |  | C1                          | -7.498586784 | -4.979202838  | 3.233111909  |
| <b>35, S=1/2</b>       |  | C2                          | -7.933425331 | -6.322025644  | 2.632291252  |
| <b>Fe (139) -2.194</b> |  | C3                          | -8.259249142 | -2.803774570  | 4.085462723  |
| <b>Fe (140) -1.878</b> |  | C4                          | -7.427547531 | -2.713079430  | 5.360162861  |
| <b>Fe (141) -2.431</b> |  | C5                          | -6.762687387 | -3.766801787  | 7.462245166  |
| <b>Fe (142) 2.830</b>  |  | C6                          | -5.250165311 | -3.885031848  | 7.249816731  |
| <b>Fe (143) 2.869</b>  |  | C7                          | -3.428967704 | -4.580058994  | 5.779278840  |
| <b>Fe (144) 2.302</b>  |  | C8                          | -2.903921822 | -3.221413775  | 5.311051567  |
| <b>Fe (145) -0.958</b> |  | C9                          | -3.396672050 | -1.151601147  | 4.110850183  |
|                        |  | C10                         | -3.193333150 | -0.189371769  | 5.292156010  |
|                        |  | C11                         | -4.025992007 | 0.638313620   | 7.419396620  |
|                        |  | C12                         | -2.916100033 | 0.295992986   | 8.421270562  |
|                        |  | C13                         | -1.911142473 | -1.424086338  | 9.847304140  |
|                        |  | C14                         | -0.494982920 | -1.825339675  | 9.413406458  |
|                        |  | C15                         | 0.863372658  | -2.910140450  | 7.666102185  |
|                        |  | C16                         | 1.585057137  | -2.056252091  | 6.617360579  |
|                        |  | C17                         | 1.364898219  | -0.487511804  | 4.714246865  |
|                        |  | C18                         | 1.715700961  | 0.896722934   | 5.315361681  |
|                        |  | C19                         | 0.432047464  | -0.394319020  | 3.494177440  |
|                        |  | C20                         | 0.977263485  | 0.619498035   | 2.483103379  |
|                        |  | C21                         | 0.239550416  | -1.785778348  | 2.879700760  |
|                        |  | C22                         | 0.865873413  | 2.937892114   | 6.421679146  |
|                        |  | C23                         | 1.335264904  | 2.909902577   | 7.892234931  |
|                        |  | C24                         | -0.412264724 | 3.792304095   | 6.224352725  |
|                        |  | C25                         | -0.275116157 | 5.157295470   | 6.908962836  |
|                        |  | C26                         | -0.723672619 | 3.971468930   | 4.733524517  |
|                        |  | C27                         | 0.909997291  | 2.251854223   | 10.193427879 |
|                        |  | C28                         | 2.345497061  | 1.846376804   | 10.461481147 |
|                        |  | C29                         | 6.508741069  | -10.321193837 | 5.999621971  |
|                        |  | C30                         | 6.999297891  | -9.221865177  | 5.061404409  |
|                        |  | C31                         | 7.214854072  | -6.743781537  | 4.855960386  |
|                        |  | C32                         | 8.491202618  | -6.174184449  | 5.504129871  |
|                        |  | C33                         | 6.056877455  | -5.733776144  | 4.919310885  |
|                        |  | C34                         | 6.370359557  | -4.409039308  | 4.221094866  |
|                        |  | C35                         | 5.105922017  | -3.575210291  | 4.017516692  |
|                        |  | C36                         | 5.099552503  | -1.098718655  | 3.582308476  |
|                        |  | C37                         | 10.749412842 | -5.326855488  | 5.090832215  |
|                        |  | C38                         | 10.968109644 | -3.877560050  | 4.715673386  |
|                        |  | C39                         | -5.404772289 | -3.032907887  | -0.420988966 |
|                        |  | C40                         | -5.764603779 | -1.537856550  | -0.323754308 |
|                        |  | C41                         | -3.867475497 | -3.167621496  | -0.448192082 |
|                        |  | C42                         | -3.320874000 | -4.599888993  | -0.271600648 |
|                        |  | C43                         | -3.149417828 | -5.404255614  | -1.560621674 |
|                        |  | C44                         | -6.373770169 | 0.409114838   | -1.705918007 |
|                        |  | C45                         | -7.387601946 | 1.093835953   | -0.779309154 |
|                        |  | C46                         | -6.656388840 | 0.660829955   | -3.191827166 |
|                        |  | C47                         | -9.436627907 | 0.867830007   | 0.539017981  |
|                        |  | C48                         | -8.907487591 | 1.228670916   | 1.931092041  |
|                        |  | C49                         | -7.076749770 | 1.054143790   | 3.551309329  |
|                        |  | C50                         | -5.907986335 | 2.033078170   | 3.455303914  |
|                        |  | C51                         | -4.518879676 | 3.486736550   | 2.063373244  |
|                        |  | C52                         | -4.926848243 | 4.923573634   | 2.462619420  |

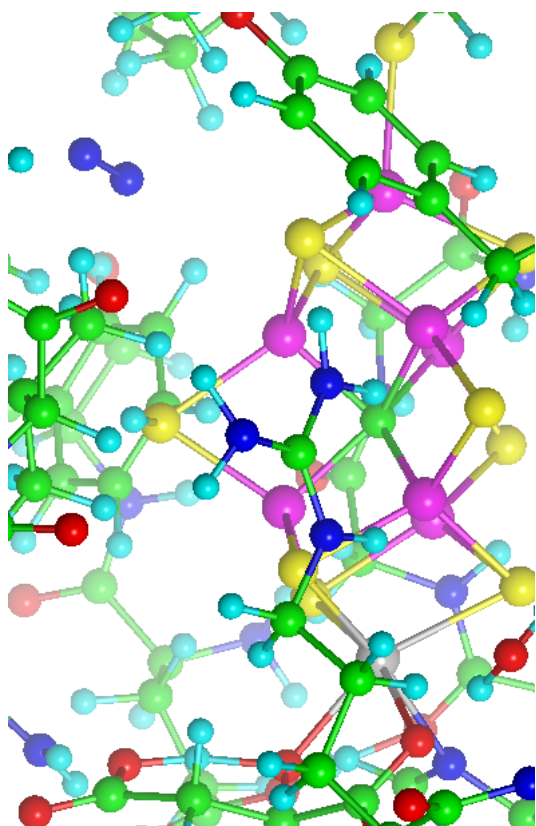

|      |               |              |              |
|------|---------------|--------------|--------------|
| C53  | -4.045059351  | 3.579244578  | 0.607075445  |
| C54  | -3.485560516  | 2.334476749  | 0.002717559  |
| C55  | -2.908123072  | 1.194278064  | 0.511054520  |
| C56  | -2.836573692  | 1.052917866  | -1.707050401 |
| C57  | -6.770968094  | 6.560965842  | 2.379853876  |
| C58  | -6.587339343  | 7.047805807  | 3.815696592  |
| C59  | -8.270931088  | 6.502761818  | 2.004381358  |
| C60  | -8.929039034  | 7.805972618  | 1.658915671  |
| C61  | -8.808392461  | 9.058219801  | 2.230270624  |
| C62  | -10.267862733 | 9.106734120  | 0.563653500  |
| C63  | 9.379389865   | 2.381218561  | 2.383448183  |
| C64  | 10.423587629  | 1.280402561  | 2.367959733  |
| C65  | 7.992020897   | 1.690136882  | 2.438279805  |
| C66  | 6.846114861   | 2.671711926  | 2.491429862  |
| C67  | 6.347449209   | 3.146258163  | 3.717036850  |
| C68  | 6.246116065   | 3.143072938  | 1.309350017  |
| C69  | 5.277463476   | 4.046852516  | 3.767857956  |
| C70  | 5.189103505   | 4.053779051  | 1.343975668  |
| C71  | 4.704478462   | 4.502933218  | 2.575453186  |
| C72  | 4.991102930   | 6.381858816  | -3.249488246 |
| C73  | 3.913191855   | 7.419728994  | -3.609142318 |
| C74  | 4.360236601   | 5.198408603  | -2.512762446 |
| C75  | 2.712679949   | 8.549676006  | -5.451450435 |
| C76  | 1.245366787   | 8.111022389  | -5.438775467 |
| C77  | -0.305440015  | 6.264348418  | -4.791574864 |
| C78  | -0.667482881  | 6.240898635  | -3.283078139 |
| C79  | -0.284350450  | 4.847431192  | -5.421951685 |
| C80  | -1.502731675  | 3.927633946  | -5.276389585 |
| C81  | -2.722822365  | 4.245659844  | -6.154980246 |
| C82  | -4.259448339  | 6.205911260  | -6.011339244 |
| C83  | 0.084621896   | 5.944829193  | -0.963086554 |
| C84  | -0.049654123  | 7.350235859  | -0.356797890 |
| C85  | 1.176164427   | 5.197748833  | -0.166141314 |
| C86  | 1.054124841   | 9.519691072  | -0.182915855 |
| C87  | 0.362798078   | 10.741192061 | -0.770825502 |
| C88  | -1.160972851  | 11.559722272 | -2.481731331 |
| C89  | -2.389613113  | 12.262178367 | -1.849999454 |
| C90  | -1.434284522  | 11.195397398 | -3.943108967 |
| C91  | -2.618342550  | 10.259974543 | -4.153194789 |
| C92  | -4.235249752  | 12.094919450 | -0.238357497 |
| C93  | -4.103030517  | 13.412127382 | 0.512467207  |
| C94  | -4.804919355  | 10.995194612 | 0.702466706  |
| C95  | -5.090958667  | 9.702946595  | -0.030572360 |
| C96  | -6.333430586  | 9.501360542  | -0.651193200 |
| C97  | -4.116979720  | 8.700262648  | -0.166277159 |
| C98  | -6.591500499  | 8.353304764  | -1.404844855 |
| C99  | -4.345606912  | 7.558143110  | -0.941819604 |
| C100 | -5.583427306  | 7.400865436  | -1.558422754 |
| C101 | 3.479045406   | -5.874302553 | -8.085404640 |
| C102 | 2.106736231   | -5.521219875 | -7.541471700 |
| C103 | 0.755104485   | -3.734409071 | -6.469977083 |
| C104 | 0.170207678   | -2.554196931 | -7.251028046 |
| C105 | 0.461816596   | -0.175835076 | -7.792053393 |
| C106 | 1.589628394   | 0.732098548  | -8.276300454 |
| C107 | 3.918877204   | 1.423116897  | -8.174534710 |
| C108 | 4.265417761   | 1.449457329  | -9.649472378 |
| C109 | -3.298337600  | -5.538432253 | -7.865517053 |
| C110 | -4.327764307  | -4.407426459 | -7.737636603 |
| C111 | -2.744455446  | -5.898721029 | -6.468352297 |
| C112 | -2.015061821  | -7.256084753 | -6.487846093 |
| C113 | -1.258126174  | -7.469349229 | -5.197664480 |
| C114 | -4.732051602  | -1.998191138 | -7.597880394 |
| C115 | -4.301293920  | -0.881196955 | -8.528043050 |
| C116 | -5.003170060  | -1.554855502 | -6.138484771 |
| C117 | -3.736196039  | -1.423561504 | -5.334316622 |
| C118 | -2.951059013  | -0.259964329 | -5.399814458 |
| C119 | -3.268390076  | -2.512166420 | -4.577793111 |
| C120 | -1.705818684  | -0.205921254 | -4.763330719 |
| C121 | -2.021892382  | -2.460538278 | -3.944982127 |
| C122 | -1.230046059  | -1.313203395 | -4.049770402 |
| C123 | 7.627014807   | -7.129236843 | -3.735481479 |
| C124 | 8.883710943   | -6.980774521 | -2.861435357 |
| C125 | 6.376480636   | -7.219474115 | -2.847243271 |
| C126 | 5.058318668   | -7.220065530 | -3.552144508 |
| C127 | 4.622896856   | -8.099055080 | -4.522800916 |
| C128 | 2.926768390   | -6.836423977 | -3.872699929 |
| C129 | 10.257097817  | -7.802217920 | -1.039780600 |
| C130 | 11.552135592  | -7.660154357 | -1.809102872 |
| C131 | 0.677708804   | -6.567421222 | 1.436151230  |
| C132 | 2.189615883   | -6.569504523 | 1.630310202  |
| C133 | 3.007690516   | -7.005002016 | 0.379808218  |
| C134 | 2.905447319   | -8.540483481 | 0.177818222  |

|       |              |               |              |
|-------|--------------|---------------|--------------|
| C135  | 3.896365008  | -9.133097983  | -0.825956269 |
| C136  | 3.884367860  | -10.676207646 | -0.910860279 |
| C137  | 4.485879806  | -6.639768560  | 0.612777552  |
| C138  | 3.393450077  | -1.187726867  | -2.179451551 |
| Fe139 | 3.615372348  | -2.754677179  | -3.443700385 |
| Fe140 | 2.016233547  | 0.078196970   | -1.829475967 |
| Fe141 | 4.573038830  | 0.308763641   | -1.558830785 |
| Fe142 | 3.554310064  | -0.221559561  | -3.966928481 |
| Fe143 | 3.246343761  | 2.201398232   | -2.777192749 |
| Fe144 | 4.719921521  | -2.239362999  | -1.124125685 |
| Fe145 | 2.179605517  | -2.459456851  | -1.408651694 |
| H146  | -6.136658863 | -7.284739089  | 2.723188324  |
| H147  | -6.451466053 | -6.631720325  | 1.260976431  |
| H148  | -9.472740959 | -4.420383252  | 3.396433908  |
| H149  | -8.717026669 | -6.131238724  | 1.881426679  |
| H150  | -8.423260491 | -6.895400956  | 3.438288432  |
| H151  | -7.724879199 | -2.225264500  | 3.317073792  |
| H152  | -8.161333869 | -4.512076644  | 6.007683354  |
| H153  | -9.225992249 | -2.314108648  | 4.264586930  |
| H154  | -7.101089342 | -4.618182673  | 8.068047525  |
| H155  | -5.524789981 | -4.833993894  | 5.439461963  |
| H156  | -6.926728124 | -2.848659376  | 8.042342866  |
| H157  | -2.464074953 | -1.150503954  | 3.533536459  |
| H158  | -4.636604695 | -2.896854867  | 4.250744645  |
| H159  | -3.286676340 | -5.315509908  | 4.975363443  |
| H160  | -3.836582325 | 1.659670141   | 7.066175205  |
| H161  | -4.933042011 | -0.861467518  | 6.169750082  |
| H162  | -2.821569711 | -4.888139702  | 6.638932773  |
| H163  | -4.205456690 | -0.785067468  | 3.463617017  |
| H164  | -3.497738594 | -1.689258622  | 8.438386926  |
| H165  | -4.992713033 | 0.622016832   | 7.941472232  |
| H166  | -0.082220918 | -2.522599783  | 3.628523378  |
| H167  | -0.529573176 | -1.769236845  | 2.092442038  |
| H168  | 1.176441048  | -2.150149172  | 2.427881013  |
| H169  | -0.541699867 | -0.024520049  | 3.857696507  |
| H170  | -2.353600679 | -2.288450400  | 10.363247280 |
| H171  | -0.867917187 | 3.009462477   | 4.222731399  |
| H172  | -0.327040589 | 1.809943085   | 8.521231016  |
| H173  | -0.131467261 | 5.071204971   | 7.995646586  |
| H174  | 0.273110713  | 0.759077606   | 1.650506139  |
| H175  | 1.938353988  | 0.293588001   | 2.057161388  |
| H176  | 9.513916713  | 2.955704366   | 3.320727695  |
| H177  | -1.644650688 | 4.559419805   | 4.607058712  |
| H178  | -1.183327778 | 5.753017621   | 6.736541444  |
| H179  | 0.093609389  | 4.514155226   | 4.231294090  |
| H180  | 0.579399069  | 5.718949355   | 6.499488971  |
| H181  | -1.254138944 | 3.253051517   | 6.695915599  |
| H182  | 1.698838408  | 3.406795309   | 5.879155147  |
| H183  | -0.257594983 | 1.208013038   | 5.820017783  |
| H184  | 1.132860911  | 1.610425558   | 2.933521398  |
| H185  | 1.491283510  | 4.305752504   | -0.728814152 |
| H186  | 0.719695106  | 4.876499517   | 0.782466616  |
| H187  | 2.687592914  | 5.769195343   | 0.953057116  |
| H188  | 3.390644200  | 5.621417216   | 3.468588197  |
| H189  | 4.722150120  | 4.396067182   | 0.419492174  |
| H190  | 6.589223801  | 2.766463654   | 0.343182070  |
| H191  | 6.787881827  | 2.796321026   | 4.654625454  |
| H192  | -0.208079607 | -1.497387177  | 5.779933491  |
| H193  | 0.686903853  | -3.902250458  | 7.220534890  |
| H194  | 1.558380494  | -3.030801638  | 8.505460700  |
| H195  | -1.220924088 | -2.501361588  | 7.598391145  |
| H196  | -1.796841632 | -0.610145729  | 10.574027978 |
| H197  | 4.882056970  | 4.380444215   | 4.730940599  |
| H198  | 2.321354646  | -0.923426514  | 4.401744155  |
| H199  | 0.728069981  | 3.239085680   | 10.649191578 |
| H200  | 0.268732200  | 1.516049353   | 10.703430726 |
| H201  | 2.800008956  | 1.168888843   | 9.702335594  |
| H202  | 11.593711269 | -5.930946407  | 4.724436702  |
| H203  | -1.964684005 | -6.832602722  | -2.422194567 |
| H204  | 1.185562879  | -6.171111283  | -0.386719702 |
| H205  | -2.753380260 | -8.064120794  | -6.593101081 |
| H206  | -1.327729650 | -7.301471047  | -7.345480390 |
| H207  | -3.562839232 | -5.942942198  | -5.733102161 |
| H208  | -3.812933382 | -1.231079498  | -9.467141619 |
| H209  | -3.897662531 | -6.392593581  | -8.214627177 |
| H210  | -3.494303384 | -2.735700464  | -1.390946356 |
| H211  | -3.994822254 | -5.182385433  | 0.380729732  |
| H212  | -2.827918310 | -2.971471557  | -7.783001692 |
| H213  | -5.700030499 | -2.336930918  | -8.018008796 |
| H214  | -1.602209044 | -4.579023388  | -8.581931373 |
| H215  | -1.397980769 | -6.280964314  | -0.847015490 |
| H216  | -2.066385411 | -5.096677026  | -6.137297589 |

|      |               |              |              |
|------|---------------|--------------|--------------|
| H217 | -1.813071597  | -6.104489373 | -9.162739840 |
| H218 | -6.900540327  | -4.107472811 | -1.356450183 |
| H219 | -3.477191177  | -2.553167921 | 0.376738295  |
| H220 | 0.363738195   | -6.845826223 | -6.115316051 |
| H221 | -2.356427787  | -4.559217723 | 0.255808212  |
| H222 | -3.691180506  | 3.209570842  | 2.731653677  |
| H223 | -2.724436260  | 0.892977106  | 1.535030382  |
| H224 | -7.836574393  | 1.533231448  | 4.184892473  |
| H225 | -7.183618682  | 0.098915347  | 1.644739207  |
| H226 | -6.872661466  | 4.453753220  | 2.017875688  |
| H227 | -8.199530150  | 9.435374242  | 3.044672314  |
| H228 | -6.701463586  | 6.240912982  | 4.579745848  |
| H229 | -8.822955552  | 5.990051805  | 2.812155941  |
| H230 | -6.234632949  | 7.245223212  | 1.703966954  |
| H231 | -10.994716156 | 9.509612360  | -0.136195201 |
| H232 | -3.271727736  | 4.364251453  | 0.569305543  |
| H233 | -4.887445841  | 3.924932347  | -0.013389371 |
| H234 | -9.817689457  | 10.862140213 | 1.680642588  |
| H235 | -8.358848870  | 5.860995214  | 1.113616052  |
| H236 | -6.141321585  | 2.237926264  | 1.395874527  |
| H237 | -6.729139965  | 0.161364401  | 4.092075890  |
| H238 | -9.898253029  | 1.782155185  | 0.140826195  |
| H239 | -2.631839440  | 0.680353930  | -2.708634980 |
| H240 | -10.228019099 | 0.116713296  | 0.656402129  |
| H241 | 10.339128086  | 3.783017882  | 1.239736295  |
| H242 | 8.713732469   | 3.801592726  | 1.067472832  |
| H243 | 1.227820933   | 5.553987748  | -2.745210720 |
| H244 | -0.881778355  | 5.451618855  | -0.790985061 |
| H245 | 1.518284135   | 7.964591794  | -1.533095137 |
| H246 | -3.838539225  | 2.911552483  | -2.052450209 |
| H247 | -5.464517816  | 3.333554684  | -3.234459006 |
| H248 | -7.056347671  | 2.203284910  | -4.333441239 |
| H249 | -5.106719653  | 4.755370966  | -2.613873683 |
| H250 | -5.866132240  | 0.165761023  | -3.780531470 |
| H251 | -7.628667006  | 0.227123794  | -3.471518563 |
| H252 | -0.517006461  | 10.804022472 | -4.406674927 |
| H253 | -1.686864155  | 12.134742810 | -4.459840397 |
| H254 | -1.493284425  | 9.093917073  | -5.452082603 |
| H255 | -3.173754825  | 8.612589044  | -5.185286280 |
| H256 | -4.436675435  | 7.429455172  | -7.651076614 |
| H257 | -3.233849620  | 3.311280384  | -6.435296268 |
| H258 | -7.570433161  | 8.206399619  | -1.869222552 |
| H259 | -3.152825787  | 8.784320014  | 0.343123455  |
| H260 | -5.068655891  | 6.831315369  | -4.225308990 |
| H261 | 0.577470911   | 4.313488609  | -4.992043881 |
| H262 | 1.824700250   | 6.268722136  | -4.794406789 |
| H263 | -1.814083855  | 3.844242679  | -4.223564179 |
| H264 | -8.500519850  | -0.618683452 | -0.699797395 |
| H265 | 2.980278337   | 8.814426812  | -6.482920258 |
| H266 | -6.328112053  | -1.739229954 | -2.226054248 |
| H267 | -0.056137326  | 4.977712931  | -6.492372064 |
| H268 | -3.550478579  | 6.825969900  | -1.088976298 |
| H269 | 2.760051075   | 9.466466282  | -4.846434700 |
| H270 | -3.771134944  | 5.863157925  | -7.987024487 |
| H271 | -5.663568143  | 7.642213502  | -5.633978410 |
| H272 | -5.388167803  | -4.309484287 | -2.040052070 |
| H273 | -5.759799444  | -3.482487072 | 0.524749952  |
| H274 | -7.121314460  | 10.250116894 | -0.542652496 |
| H275 | -5.424149483  | 0.893094451  | -1.446227035 |
| H276 | -1.055824456  | 6.901178919  | -5.272496611 |
| H277 | -2.387305636  | 4.715698443  | -7.089030814 |
| H278 | -1.162358517  | 2.924350761  | -5.571899363 |
| H279 | -4.024220238  | 4.795982976  | -4.560508477 |
| H280 | 0.725218617   | 9.422155932  | 0.863103651  |
| H281 | -0.680496250  | 9.511347171  | -2.021718451 |
| H282 | -0.398197680  | 12.354826839 | -2.489153385 |
| H283 | 2.133697159   | 9.721078517  | -0.184591802 |
| H284 | -2.630590442  | 10.719568438 | -0.557451139 |
| H285 | 3.954820716   | -4.978480334 | -8.511512761 |
| H286 | 4.084324783   | -6.169252158 | -7.202575189 |
| H287 | 7.580749509   | -6.204279400 | -4.328879866 |
| H288 | 4.300668359   | -7.298755821 | -9.288960786 |
| H289 | 2.807684333   | -7.680722071 | -8.736148158 |
| H290 | 5.159756957   | 4.481301116  | -2.280300597 |
| H291 | 5.595515450   | 7.423382671  | -1.600674073 |
| H292 | 4.206670968   | 7.034523740  | -5.607887879 |
| H293 | 3.894606613   | 5.546978583  | -1.579116685 |
| H294 | 6.536192777   | 7.690826102  | -2.913472504 |
| H295 | 4.820833368   | 1.106603616  | -7.627910444 |
| H296 | 5.466528282   | 6.015498587  | -4.172632653 |
| H297 | 5.793516669   | -5.557307156 | 5.975858903  |
| H298 | 7.409823181   | -7.001944976 | 3.807579203  |

|       |              |               |               |
|-------|--------------|---------------|---------------|
| H299  | 3.068663438  | -0.277624985  | -7.204841724  |
| H300  | 5.153956788  | 0.833027879   | 2.920427273   |
| H301  | 0.657487830  | -1.017559832  | 0.476587527   |
| H302  | -0.133572120 | -0.464967966  | -8.667593984  |
| H303  | -1.660322096 | -3.322516249  | -3.379842876  |
| H304  | -0.189115667 | 0.452768711   | -7.160323890  |
| H305  | 4.655263554  | -3.300456527  | 4.979093571   |
| H306  | 1.570203240  | -1.362609348  | -6.363417353  |
| H307  | 4.351234429  | -4.172147348  | 3.479470165   |
| H308  | 5.189155333  | -6.212689888  | 4.437278400   |
| H309  | 6.815887711  | -4.600661278  | 3.233384621   |
| H310  | 7.101498362  | -3.822519544  | 4.800188656   |
| H311  | -5.664002656 | -2.305598160  | -5.681377269  |
| H312  | 6.471599281  | -7.933537076  | 6.495583626   |
| H313  | 5.579421364  | -10.705983398 | 5.552259964   |
| H314  | -0.242318219 | -1.275619723  | -3.588152237  |
| H315  | 7.063131490  | -9.936307356  | 7.946180140   |
| H316  | 5.508424135  | -10.427086532 | 7.794946011   |
| H317  | 5.657592164  | -2.524839218  | 2.264175015   |
| H318  | -1.083097750 | 0.689758168   | -4.825429168  |
| H319  | -3.876138100 | -3.414796960  | -4.488961997  |
| H320  | 7.663464645  | -10.044559573 | 0.153204352   |
| H321  | 6.432380693  | -8.144237990  | -2.248159640  |
| H322  | 6.719507065  | -7.970658647  | 1.349026019   |
| H323  | 6.710439477  | -10.859957585 | -0.761355557  |
| H324  | 3.955289083  | 0.545939494   | -10.226687300 |
| H325  | 6.444421335  | -4.896576896  | 0.457818133   |
| H326  | 2.443117878  | -7.189282178  | 2.499052993   |
| H327  | 2.781764742  | -3.642483613  | -7.082489742  |
| H328  | 3.076370449  | -9.001293066  | 1.163479278   |
| H329  | 2.648785568  | -8.347016914  | -5.316642171  |
| H330  | 1.914963263  | -6.461375719  | -3.790086864  |
| H331  | 7.246964784  | -11.138736569 | 5.942003018   |
| H332  | 5.367726210  | -0.359970454  | 1.663707311   |
| H333  | 8.531759992  | -5.473178049  | 1.454156835   |
| H334  | 7.405868541  | -3.729538973  | 0.1047335532  |
| H335  | 9.342032186  | -6.000782928  | 3.609244039   |
| H336  | 4.552723115  | -1.461460347  | 5.519184782   |
| H337  | 3.671650406  | -8.753565008  | -1.833992361  |
| H338  | 4.920065329  | -8.814623432  | -0.586702992  |
| H339  | 1.874952628  | -8.788212774  | -0.118826049  |
| H340  | 0.986525360  | -3.443047275  | -5.433004445  |
| H341  | -3.308496335 | 0.591627086   | -5.984536349  |
| H342  | -5.548516077 | -0.599161285  | -6.186513568  |
| H343  | 2.455574975  | -5.527750269  | 1.881287608   |
| H344  | 8.658971040  | -7.013967982  | 1.636085547   |
| H345  | 7.571238398  | -8.837656646  | 2.311100886   |
| H346  | 4.260033483  | 0.118537440   | 4.977081737   |
| H347  | 5.145361559  | -8.883752139  | -5.054290545  |
| H348  | 6.390523898  | -6.394601674  | -2.124644246  |
| H349  | 0.012432047  | -4.535317988  | -6.456195992  |
| H350  | 3.671361403  | 2.444529620   | -7.847222138  |
| H351  | 7.975071923  | 1.042390946   | 3.327839306   |
| H352  | 7.889746768  | 1.043364510   | 1.551824090   |
| H353  | 8.556732076  | -8.145447656  | -5.255562658  |
| H354  | 7.836361801  | -9.136715128  | -4.170478756  |
| H355  | 10.331557136 | -8.726023550  | -0.445833054  |
| H356  | 8.459488487  | -8.705969349  | -1.742619640  |
| H357  | 11.546475854 | -8.117605367  | -2.828349725  |
| H358  | 10.149130905 | -6.963109924  | -0.334189247  |
| H359  | 10.573552570 | 0.808436607   | 1.367446985   |
| H360  | -3.064698113 | 13.679627229  | 0.819911424   |
| H361  | 10.752079427 | -5.375553155  | 6.194011220   |
| H362  | 10.033766173 | -3.287342691  | 4.544051376   |
| H363  | -4.945297810 | 12.260230675  | -1.067226182  |
| H364  | -4.090706024 | 10.823447831  | 1.522938229   |
| H365  | -5.727135804 | 11.392716742  | 1.149849473   |
| H366  | -6.737021029 | 6.199042885   | -2.570509280  |
| H367  | -1.902169640 | -0.402063368  | -0.537873914  |
| M0368 | 3.644196090  | -4.696124810  | -1.576303039  |
| N369  | -6.883491493 | -7.131936107  | 2.041071851   |
| N370  | -8.517128151 | -4.162265272  | 3.631077310   |
| N371  | -7.538507449 | -3.740114941  | 6.234596167   |
| N372  | -4.838205890 | -4.547132024  | 6.139267379   |
| N373  | -3.735820996 | -2.505014757  | 4.519329974   |
| N374  | -4.105781116 | -0.271957444  | 6.287995099   |
| N375  | -2.823612636 | -1.005656424  | 8.794025455   |
| N376  | -0.388328492 | -2.383243965  | 8.176962431   |
| N377  | 0.803727417  | -1.363631829  | 5.748630207   |
| N378  | 0.688569358  | 1.594824967   | 5.862482949   |
| N379  | 0.573687125  | 2.221164739   | 8.779226112   |
| N380  | 6.229192802  | -9.848228443  | 7.361276782   |

|      |              |              |               |
|------|--------------|--------------|---------------|
| N381 | 6.836920369  | -7.972624413 | 5.538403244   |
| N382 | 5.364351771  | -2.365952606 | 3.230398069   |
| N383 | -0.355875661 | 2.406344887  | -1.353203909  |
| N384 | -0.528406718 | 2.863244699  | -0.350045563  |
| N385 | 4.828121602  | -0.738937700 | 4.853653289   |
| N386 | 5.094583478  | -0.142376614 | 2.636790056   |
| N387 | 9.480989779  | -5.855390457 | 4.633379067   |
| N388 | -6.035623027 | -3.624770479 | -1.607605422  |
| N389 | -2.105243104 | -6.251788439 | -1.589000443  |
| N390 | -6.252625474 | -1.021853490 | -1.484274328  |
| N391 | -8.449057504 | 0.350067915  | -0.392229497  |
| N392 | -7.712544143 | 0.685276307  | 2.299293659   |
| N393 | -5.594384432 | 2.517418265  | 2.215593668   |
| N394 | -3.435921755 | 2.205943697  | -1.376505608  |
| N395 | -2.522358959 | 0.423916023  | -0.566519562  |
| N396 | -6.237992227 | 5.210394050  | 2.261033570   |
| N397 | -9.842095842 | 7.850557536  | 0.617638072   |
| N398 | -9.665891776 | 9.870373823  | 1.518187539   |
| N399 | 9.519285313  | 3.176314279  | 1.160594270   |
| N400 | 6.041092235  | 6.958315835  | -2.397813335  |
| N401 | 3.670507095  | 7.586532356  | -4.943292337  |
| N402 | 1.010494642  | 6.849110523  | -5.025449652  |
| N403 | -3.695269642 | 5.117979885  | -5.487665584  |
| N404 | -4.101951658 | 6.536094983  | -7.305348229  |
| N405 | -4.942193173 | 7.060783428  | -5.214191334  |
| N406 | 0.337794658  | 5.960439567  | -2.405275609  |
| N407 | 0.790047185  | 8.283275325  | -0.887621427  |
| N408 | -0.603804680 | 10.475673580 | -1.701847152  |
| N409 | -2.438078390 | 9.312983793  | -5.112991163  |
| N410 | -2.947821162 | 11.662542445 | -0.768313226  |
| N411 | 3.370470327  | -6.912277710 | -9.112763121  |
| N412 | 1.959005182  | -4.250329500 | -7.108807806  |
| N413 | 0.839620036  | -1.389524064 | -7.090235445  |
| N414 | 2.855242309  | 0.484324599  | -7.856537422  |
| N415 | -2.308754711 | -5.247919803 | -8.909173910  |
| N416 | -3.838302428 | -3.134069587 | -7.734860088  |
| N417 | 7.716254076  | -8.256624442 | -4.681206652  |
| N418 | 3.978462439  | -6.423980681 | -3.165935281  |
| N419 | 3.283649261  | -7.837536226 | -4.707927329  |
| N420 | 9.110852991  | -7.937883960 | -1.920873468  |
| O421 | -6.306955494 | -4.658651723 | 3.393093288   |
| O422 | -6.695328925 | -1.727998511 | 5.565517668   |
| O423 | -4.463693635 | -3.404782373 | 8.082351197   |
| O424 | -1.782418730 | -2.800122103 | 5.648910744   |
| O425 | -2.244099295 | 0.611198949  | 5.307791221   |
| O426 | -2.181366551 | 1.186543632  | 8.883141205   |
| O427 | 0.452614393  | -1.685511511 | 10.198528708  |
| O428 | 2.827542436  | -2.058849897 | 6.578002221   |
| O429 | 2.881604239  | 1.337350892  | 5.281290529   |
| O430 | 2.363632046  | 3.510755656  | 8.245011768   |
| O431 | 2.949546578  | 2.175883738  | 11.471260123  |
| O432 | 7.476008234  | -9.524357422 | 3.947734465   |
| O433 | 8.566838684  | -6.021634673 | 6.735891710   |
| O434 | 12.071647014 | -3.363867525 | 4.622926778   |
| O435 | -5.605458184 | -0.860917854 | 0.711079692   |
| O436 | -3.949466528 | -5.299030816 | -2.519141324  |
| O437 | -7.203346859 | 2.263153822  | -0.395941120  |
| O438 | -6.664742232 | 2.079889314  | -3.449959156  |
| O439 | -9.576949186 | 1.972169826  | 2.659619841   |
| O440 | -5.294346559 | 2.362138644  | 4.475907477   |
| O441 | -4.092944927 | 5.753065139  | 2.833737586   |
| O442 | -6.370879357 | 8.204083101  | 4.133123198   |
| O443 | 11.051708354 | 0.911027230  | 3.348977958   |
| O444 | 3.639176320  | 5.383528924  | 2.556819100   |
| O445 | 3.305923509  | 8.073483966  | -2.743543145  |
| O446 | 0.365101608  | 8.919456504  | -5.794243047  |
| O447 | -1.831483314 | 6.479580483  | -2.924035284  |
| O448 | -0.818907532 | 7.562932616  | 0.589699228   |
| O449 | 2.307584422  | 6.036365956  | 0.089340652   |
| O450 | 0.656794917  | 11.885667613 | -0.404322565  |
| O451 | -2.785417954 | 13.346008488 | -2.300377159  |
| O452 | -3.685824453 | 10.401913455 | -3.538804110  |
| O453 | -5.060437020 | 14.117271607 | 0.787042776   |
| O454 | -5.780943220 | 6.272157211  | -2.383433123  |
| O455 | 1.201139329  | -6.387009149 | -7.480711444  |
| O456 | -0.827442167 | -2.681215898 | -7.989610775  |
| O457 | 1.309963045  | 1.693813200  | -9.011013047  |
| O458 | 4.871023027  | 2.369890756  | -10.173705737 |
| O459 | -5.540983740 | -4.646714552 | -7.619593464  |
| O460 | -1.785096078 | -7.863798187 | -4.162312676  |
| O461 | 0.051479760  | -7.149911548 | -5.208073324  |
| O462 | -4.501946024 | 0.308291255  | -8.326367252  |

|                                                                                                                                                                                                                                              |              |              |                                   |              |
|----------------------------------------------------------------------------------------------------------------------------------------------------------------------------------------------------------------------------------------------|--------------|--------------|-----------------------------------|--------------|
|                                                                                                                                                                                                                                              | O463         | 9.690688659  | -6.046183834                      | -3.027053625 |
|                                                                                                                                                                                                                                              | O464         | 12.564735106 | -7.156737765                      | -1.342810808 |
|                                                                                                                                                                                                                                              | O465         | 0.268715277  | -6.244526438                      | 0.202905998  |
|                                                                                                                                                                                                                                              | O466         | -0.115215927 | -6.778755536                      | 2.351881554  |
|                                                                                                                                                                                                                                              | O467         | 5.015880258  | -11.257871900                     | -1.063335595 |
|                                                                                                                                                                                                                                              | O468         | 2.762754246  | -11.256112272                     | -0.866192513 |
|                                                                                                                                                                                                                                              | O469         | 5.005075239  | -5.789389970                      | -0.230035047 |
|                                                                                                                                                                                                                                              | O470         | 5.122124101  | -7.154136095                      | 1.552793687  |
|                                                                                                                                                                                                                                              | O471         | 2.503244550  | -6.285250962                      | -0.749869973 |
|                                                                                                                                                                                                                                              | O472         | 9.135801584  | -6.161227608                      | 1.830260419  |
|                                                                                                                                                                                                                                              | O473         | 7.175877931  | -4.338158823                      | 0.830684383  |
|                                                                                                                                                                                                                                              | O474         | -4.715491539 | 3.967473026                       | -3.069104326 |
|                                                                                                                                                                                                                                              | O475         | 7.685270100  | -10.721819455                     | -0.561502267 |
|                                                                                                                                                                                                                                              | O476         | 7.593837502  | -8.433751784                      | 1.404396804  |
|                                                                                                                                                                                                                                              | S477         | 3.059265096  | 4.354420197                       | -3.523619619 |
|                                                                                                                                                                                                                                              | S478         | 1.620739966  | 0.968666399                       | -3.823153292 |
|                                                                                                                                                                                                                                              | S479         | 1.795210319  | -3.963680768                      | -2.947447666 |
|                                                                                                                                                                                                                                              | S480         | 3.032122735  | 1.677969295                       | -0.616345958 |
|                                                                                                                                                                                                                                              | S481         | 0.412533637  | -1.193696629                      | -0.845950044 |
|                                                                                                                                                                                                                                              | S482         | 3.809460527  | -1.842604201                      | -5.458037406 |
|                                                                                                                                                                                                                                              | S483         | 3.325324418  | -3.199730577                      | 0.320660489  |
|                                                                                                                                                                                                                                              | S484         | 5.219146303  | 1.265001211                       | -3.451920812 |
|                                                                                                                                                                                                                                              | S485         | 5.502643779  | -3.666877375                      | -2.634098619 |
|                                                                                                                                                                                                                                              | S486         | 6.146396089  | -0.757302061                      | -0.406361842 |
|                                                                                                                                                                                                                                              | end          |              |                                   |              |
| <b>rest-S2BH</b><br><b>2N2 TS</b><br><b>35, S=1/2</b><br><br><b>Fe( 139) -2.093</b><br><b>Fe( 140) -2.612</b><br><b>Fe( 141) -2.601</b><br><b>Fe( 142) 2.817</b><br><b>Fe( 143) 2.962</b><br><b>Fe( 144) 2.281</b><br><b>Fe( 145) -0.140</b> |              |              | <b>bm522n2x2bhdtd 2 52985.815</b> |              |
| 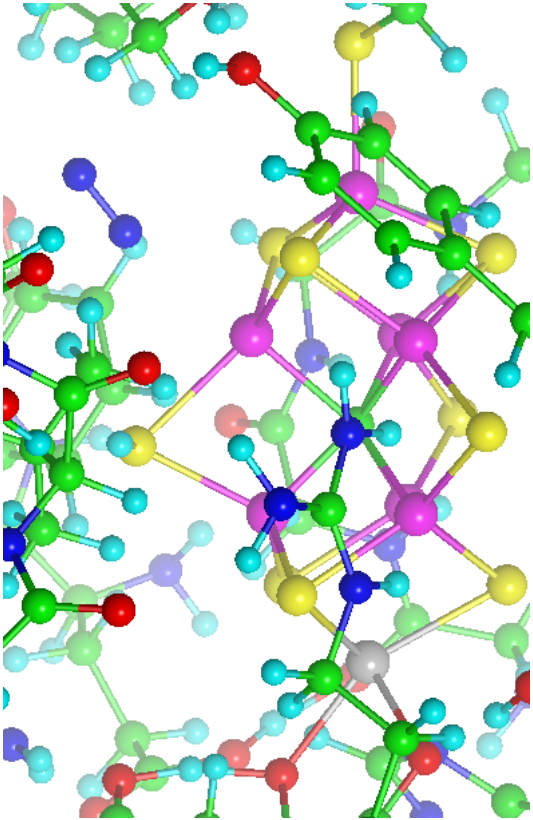                                                                                                                                                          | C1           | -7.513053861 | -4.987777765                      | 3.228959227  |
|                                                                                                                                                                                                                                              | C2           | -7.965806940 | -6.324832368                      | 2.630875441  |
|                                                                                                                                                                                                                                              | C3           | -8.239143003 | -2.797799442                      | 4.067390539  |
|                                                                                                                                                                                                                                              | C4           | -7.417390993 | -2.706728081                      | 5.349597626  |
|                                                                                                                                                                                                                                              | C5           | -6.758652032 | -3.761638078                      | 7.452511970  |
|                                                                                                                                                                                                                                              | C6           | -5.246734432 | -3.873752966                      | 7.232929463  |
|                                                                                                                                                                                                                                              | C7           | -3.430396554 | -4.561284212                      | 5.753074651  |
|                                                                                                                                                                                                                                              | C8           | -2.904829421 | -3.196945379                      | 5.302329163  |
|                                                                                                                                                                                                                                              | C9           | -3.393260038 | -1.114229648                      | 4.121784744  |
|                                                                                                                                                                                                                                              | C10          | -3.190808309 | -0.158652594                      | 5.308269461  |
|                                                                                                                                                                                                                                              | C11          | -4.027140055 | 0.658241025                       | 7.439050922  |
|                                                                                                                                                                                                                                              | C12          | -2.916304504 | 0.311694935                       | 8.438596828  |
|                                                                                                                                                                                                                                              | C13          | -1.911305764 | -1.413127534                      | 9.857799374  |
|                                                                                                                                                                                                                                              | C14          | -0.498538700 | -1.816415137                      | 9.414983070  |
|                                                                                                                                                                                                                                              | C15          | 0.849102545  | -2.900335023                      | 7.659647510  |
|                                                                                                                                                                                                                                              | C16          | 1.574359462  | -2.044345768                      | 6.615550276  |
|                                                                                                                                                                                                                                              | C17          | 1.359786091  | -0.460310470                      | 4.724219619  |
|                                                                                                                                                                                                                                              | C18          | 1.713433726  | 0.925001530                       | 5.319675180  |
|                                                                                                                                                                                                                                              | C19          | 0.432268694  | -0.373318322                      | 3.499686580  |
|                                                                                                                                                                                                                                              | C20          | 0.989719905  | 0.625731581                       | 2.480477288  |
|                                                                                                                                                                                                                                              | C21          | 0.232549583  | -1.769901676                      | 2.899318092  |
|                                                                                                                                                                                                                                              | C22          | 0.868442837  | 2.966032717                       | 6.431886177  |
|                                                                                                                                                                                                                                              | C23          | 1.338108748  | 2.935831090                       | 7.902334593  |
|                                                                                                                                                                                                                                              | C24          | -0.408950834 | 3.821864254                       | 6.237730959  |
|                                                                                                                                                                                                                                              | C25          | -0.273490189 | 5.184792827                       | 6.926909777  |
|                                                                                                                                                                                                                                              | C26          | -0.719068374 | 4.005778221                       | 4.747149210  |
|                                                                                                                                                                                                                                              | C27          | 0.917718875  | 2.270681059                       | 10.201782655 |
|                                                                                                                                                                                                                                              | C28          | 2.361772764  | 1.895474359                       | 10.469826843 |
|                                                                                                                                                                                                                                              | C29          | 6.530566819  | -10.329120507                     | 6.005856040  |
|                                                                                                                                                                                                                                              | C30          | 6.999941859  | -9.227823159                      | 5.057967283  |
|                                                                                                                                                                                                                                              | C31          | 7.201747226  | -6.748340941                      | 4.847020843  |
|                                                                                                                                                                                                                                              | C32          | 8.472574447  | -6.175356444                      | 5.504023152  |
|                                                                                                                                                                                                                                              | C33          | 6.040231504  | -5.741014954                      | 4.901617065  |
|                                                                                                                                                                                                                                              | C34          | 6.352245466  | -4.417073704                      | 4.200413004  |
|                                                                                                                                                                                                                                              | C35          | 5.090251258  | -3.574922187                      | 4.013887367  |
| C36                                                                                                                                                                                                                                          | 5.083737820  | -1.098280016 | 3.571970247                       |              |
| C37                                                                                                                                                                                                                                          | 10.739166042 | -5.338203144 | 5.109482709                       |              |
| C38                                                                                                                                                                                                                                          | 10.959346310 | -3.887916293 | 4.738525259                       |              |
| C39                                                                                                                                                                                                                                          | -5.410642401 | -3.033210510 | -0.401391477                      |              |
| C40                                                                                                                                                                                                                                          | -5.748525399 | -1.533868955 | -0.301027431                      |              |
| C41                                                                                                                                                                                                                                          | -3.873020104 | -3.177174744 | -0.421152328                      |              |
| C42                                                                                                                                                                                                                                          | -3.326749943 | -4.609461724 | -0.249861537                      |              |
| C43                                                                                                                                                                                                                                          | -3.159544688 | -5.411179945 | -1.540785630                      |              |
| C44                                                                                                                                                                                                                                          | -6.323189692 | 0.425830151  | -1.682313216                      |              |
| C45                                                                                                                                                                                                                                          | -7.349277384 | 1.103106531  | -0.764178134                      |              |
| C46                                                                                                                                                                                                                                          | -6.594315380 | 0.680940661  | -3.170110163                      |              |
| C47                                                                                                                                                                                                                                          | -9.410803645 | 0.850002437  | 0.532316488                       |              |
| C48                                                                                                                                                                                                                                          | -8.896364548 | 1.209949235  | 1.930325081                       |              |
| C49                                                                                                                                                                                                                                          | -7.067243134 | 1.068970276  | 3.555964785                       |              |
| C50                                                                                                                                                                                                                                          | -5.893874800 | 2.042799668  | 3.462349301                       |              |
| C51                                                                                                                                                                                                                                          | -4.502960290 | 3.503390764  | 2.083518906                       |              |
| C52                                                                                                                                                                                                                                          | -4.945494161 | 4.923446070  | 2.504287306                       |              |
| C53                                                                                                                                                                                                                                          | -4.026375825 | 3.625483685  | 0.628619227                       |              |
| C54                                                                                                                                                                                                                                          | -3.433536942 | 2.399985769  | 0.017269176                       |              |
| C55                                                                                                                                                                                                                                          | -2.844205722 | 1.268525556  | 0.526457157                       |              |

|      |               |               |              |
|------|---------------|---------------|--------------|
| C56  | -2.794985653  | 1.112140621   | -1.692252563 |
| C57  | -6.790919198  | 6.548360482   | 2.364257009  |
| C58  | -6.613839052  | 7.033696674   | 3.801862020  |
| C59  | -8.291209193  | 6.482362046   | 1.990386534  |
| C60  | -8.954812726  | 7.782047990   | 1.642237617  |
| C61  | -8.852070177  | 9.032715933   | 2.221595518  |
| C62  | -10.289605024 | 9.077235807   | 0.535693134  |
| C63  | 9.364430248   | 2.380371772   | 2.403183115  |
| C64  | 10.405157642  | 1.276526624   | 2.400169666  |
| C65  | 7.974617538   | 1.695349414   | 2.452902456  |
| C66  | 6.832029563   | 2.682218232   | 2.496930518  |
| C67  | 6.333679414   | 3.167655486   | 3.718554528  |
| C68  | 6.231516915   | 3.142201275   | 1.310963343  |
| C69  | 5.260029620   | 4.063931058   | 3.761837662  |
| C70  | 5.170997037   | 4.048995467   | 1.338553116  |
| C71  | 4.682754600   | 4.503635196   | 2.565831493  |
| C72  | 4.992655924   | 6.371832540   | -3.224520433 |
| C73  | 3.910280577   | 7.402233746   | -3.594652360 |
| C74  | 4.354549103   | 5.199564194   | -2.486244157 |
| C75  | 2.727584865   | 8.543776783   | -5.440980210 |
| C76  | 1.261064554   | 8.102449111   | -5.430642862 |
| C77  | -0.293333081  | 6.250051010   | -4.813146657 |
| C78  | -0.680944269  | 6.225434936   | -3.311599812 |
| C79  | -0.267583428  | 4.835396696   | -5.444372225 |
| C80  | -1.490830267  | 3.921455266   | -5.295538865 |
| C81  | -2.710807969  | 4.245561991   | -6.170925257 |
| C82  | -4.233929137  | 6.216156571   | -6.018533992 |
| C83  | 0.007159915   | 5.890638817   | -0.983261253 |
| C84  | -0.119755032  | 7.296669900   | -0.388922287 |
| C85  | 1.079297063   | 5.144680722   | -0.155842904 |
| C86  | 1.030814598   | 9.445425282   | -0.211698662 |
| C87  | 0.364153644   | 10.684587107  | -0.781806927 |
| C88  | -1.159138108  | 11.551861935  | -2.470722502 |
| C89  | -2.380454698  | 12.257758567  | -1.829733235 |
| C90  | -1.438221208  | 11.210041871  | -3.936879699 |
| C91  | -2.613000868  | 10.263974437  | -4.149733984 |
| C92  | -4.230177121  | 12.091171579  | -0.229345660 |
| C93  | -4.100664694  | 13.412238265  | 0.516002137  |
| C94  | -4.812056669  | 10.999505428  | 0.712905877  |
| C95  | -5.103649029  | 9.709696719   | -0.021171041 |
| C96  | -6.342711677  | 9.517829745   | -0.651745712 |
| C97  | -4.133946270  | 8.702480108   | -0.151647300 |
| C98  | -6.601531557  | 8.373301441   | -1.410184106 |
| C99  | -4.363420328  | 7.564344387   | -0.932044243 |
| C100 | -5.597569526  | 7.415821325   | -1.558301037 |
| C101 | 3.472420485   | -5.875368347  | -8.078743481 |
| C102 | 2.095672481   | -5.519083589  | -7.547496130 |
| C103 | 0.741409900   | -3.732615455  | -6.479091102 |
| C104 | 0.155454013   | -2.554642283  | -7.263413771 |
| C105 | 0.452079300   | -0.180188063  | -7.820856576 |
| C106 | 1.579011084   | 0.740007968   | -8.281858920 |
| C107 | 3.904485218   | 1.447453299   | -8.146268250 |
| C108 | 4.310839878   | 1.415155421   | -9.606819823 |
| C109 | -3.312690989  | -5.544085839  | -7.843972723 |
| C110 | -4.342572048  | -4.416269300  | -7.707478795 |
| C111 | -2.750884720  | -5.905899399  | -6.449770330 |
| C112 | -2.028438778  | -7.265748019  | -6.471469139 |
| C113 | -1.254321817  | -7.472498230  | -5.189380912 |
| C114 | -4.752114159  | -2.008289357  | -7.561212630 |
| C115 | -4.342381025  | -0.895367198  | -8.505546983 |
| C116 | -5.009306481  | -1.559020230  | -6.102269033 |
| C117 | -3.735202155  | -1.411715195  | -5.313552462 |
| C118 | -2.957995868  | -0.243900365  | -5.400343169 |
| C119 | -3.250879998  | -2.489646287  | -4.550984451 |
| C120 | -1.704913504  | -0.175817049  | -4.781104876 |
| C121 | -1.996777278  | -2.423635389  | -3.934871892 |
| C122 | -1.212800552  | -1.272712629  | -4.063130381 |
| C123 | 7.633103107   | -7.110100209  | -3.740328580 |
| C124 | 8.889787990   | -6.968688252  | -2.865594152 |
| C125 | 6.379911194   | -7.256228545  | -2.861340969 |
| C126 | 5.063908606   | -7.235149491  | -3.570867113 |
| C127 | 4.624636511   | -8.112193928  | -4.541755430 |
| C128 | 2.941493161   | -6.824759179  | -3.906454825 |
| C129 | 10.269156180  | -7.799350066  | -1.052824151 |
| C130 | 11.559909812  | -7.673458388  | -1.831244239 |
| C131 | 0.685877456   | -6.609650915  | 1.410951742  |
| C132 | 2.198285156   | -6.610552859  | 1.603738052  |
| C133 | 3.013444896   | -7.035303520  | 0.346843695  |
| C134 | 2.907254829   | -8.570455357  | 0.139412293  |
| C135 | 3.890077739   | -9.165677370  | -0.871322220 |
| C136 | 3.900868339   | -10.711235290 | -0.926447770 |
| C137 | 4.490631436   | -6.672559903  | 0.578853681  |



|       |              |              |              |
|-------|--------------|--------------|--------------|
| C138  | 3.388516447  | -1.197933822 | -2.165523852 |
| Fe139 | 3.655984650  | -2.718578252 | -3.440870743 |
| Fe140 | 1.915955599  | 0.196470583  | -1.777667250 |
| Fe141 | 4.604126763  | 0.282535580  | -1.604883218 |
| Fe142 | 3.464012601  | -0.223586982 | -3.928419578 |
| Fe143 | 3.288817442  | 2.225050650  | -2.794698691 |
| Fe144 | 4.700344182  | -2.265717215 | -1.096261290 |
| Fe145 | 2.216644344  | -2.435816983 | -1.392809472 |
| H146  | -6.174270530 | -7.300655707 | 2.679762300  |
| H147  | -6.510927192 | -6.631055342 | 1.229377263  |
| H148  | -9.479811109 | -4.398890840 | 3.392074978  |
| H149  | -8.765327075 | -6.127607200 | 1.898389688  |
| H150  | -8.440471246 | -6.900179719 | 3.444368084  |
| H151  | -7.680865863 | -2.242457381 | 3.299075513  |
| H152  | -8.159506544 | -4.502106202 | 5.997445529  |
| H153  | -9.195077401 | -2.282961512 | 4.231598306  |
| H154  | -7.091797562 | -4.618130956 | 8.053928671  |
| H155  | -5.526432089 | -4.820496172 | 5.420978663  |
| H156  | -6.923640317 | -2.848684194 | 8.040149117  |
| H157  | -2.458900642 | -1.112099536 | 3.547528253  |
| H158  | -4.643224662 | -2.850953829 | 4.259087834  |
| H159  | -3.294086665 | -5.285543700 | 4.938032715  |
| H160  | -3.839510559 | 1.682132371  | 7.091926314  |
| H161  | -4.929157186 | -0.838311198 | 6.181449433  |
| H162  | -2.819670986 | -4.882471683 | 6.605433022  |
| H163  | -4.198626510 | -0.741239859 | 3.474088707  |
| H164  | -3.503584640 | -1.672439260 | 8.453072663  |
| H165  | -4.994156764 | 0.637112358  | 7.960609669  |
| H166  | -0.091452837 | -2.496652670 | 3.656964161  |
| H167  | -0.538698524 | -1.758760325 | 2.114101296  |
| H168  | 1.166107107  | -2.143414475 | 2.448180033  |
| H169  | -0.539816472 | 0.009200793  | 3.854058872  |
| H170  | -2.352391067 | -2.277140580 | 10.375016486 |
| H171  | -0.863986933 | 3.045008235  | 4.233920395  |
| H172  | -0.314679725 | 1.820297484  | 8.528218679  |
| H173  | -0.126741467 | 5.095378757  | 8.012904669  |
| H174  | 0.289608639  | 0.755000695  | 1.642037751  |
| H175  | 1.953656858  | 0.292072634  | 2.066296959  |
| H176  | 9.494710386  | 2.958666229  | 3.337719842  |
| H177  | -1.638974394 | 4.595612955  | 4.621172352  |
| H178  | -1.184164667 | 5.778293937  | 6.759000672  |
| H179  | 0.100121453  | 4.548135490  | 4.247293291  |
| H180  | 0.578471779  | 5.750824549  | 6.517630256  |
| H181  | -1.250883343 | 3.280962344  | 6.706889749  |
| H182  | 1.701808237  | 3.434856036  | 5.889777207  |
| H183  | -0.257303250 | 1.236307562  | 5.833853455  |
| H184  | 1.143201002  | 1.622997846  | 2.918538846  |
| H185  | 1.404457371  | 4.248327507  | -0.704575794 |
| H186  | 0.595213996  | 4.830103589  | 0.782600625  |
| H187  | 2.604004620  | 5.693321460  | 0.958682101  |
| H188  | 3.354975068  | 5.612891402  | 3.449760127  |
| H189  | 4.702706254  | 4.381211584  | 0.411683083  |
| H190  | 6.574460957  | 2.756837238  | 0.348072120  |
| H191  | 6.775962295  | 2.827096101  | 4.658848046  |
| H192  | -0.217095667 | -1.456170542 | 5.796818468  |
| H193  | 0.666602055  | -3.888303701 | 7.207897199  |
| H194  | 1.544467374  | -3.030239858 | 8.497190128  |
| H195  | -1.234987289 | -2.488531499 | 7.602495528  |
| H196  | -1.791560809 | -0.600426640 | 10.585002130 |
| H197  | 4.863718554  | 4.403418494  | 4.722123679  |
| H198  | 2.315682440  | -0.900504526 | 4.415989724  |
| H199  | 0.716256693  | 3.254316285  | 10.657549324 |
| H200  | 0.289994224  | 1.522241412  | 10.710305794 |
| H201  | 2.829247808  | 1.227122063  | 9.710630809  |
| H202  | 11.583303935 | -5.943590386 | 4.744637312  |
| H203  | -1.960498822 | -6.818538147 | -2.418689254 |
| H204  | 1.201513814  | -6.189670905 | -0.408027456 |
| H205  | -2.770599867 | -8.071806571 | -6.560353695 |
| H206  | -1.351763118 | -7.320173408 | -7.337095996 |
| H207  | -3.565164119 | -5.944191069 | -5.709936030 |
| H208  | -3.865203264 | -1.248720663 | -9.449303898 |
| H209  | -3.912536130 | -6.399341005 | -8.192010643 |
| H210  | -3.493867168 | -2.738628577 | -1.358756854 |
| H211  | -3.996386055 | -5.193423973 | 0.404763818  |
| H212  | -2.846279710 | -2.976578427 | -7.764217172 |
| H213  | -5.724785250 | -2.355656212 | -7.967493311 |
| H214  | -1.623304215 | -4.578627575 | -8.569599997 |
| H215  | -1.383606774 | -6.260764336 | -0.849166344 |
| H216  | -2.067724054 | -5.105551930 | -6.125167939 |
| H217  | -1.829255483 | -6.106849139 | -9.145279048 |
| H218  | -6.916793314 | -4.073963745 | -1.357579220 |
| H219  | -3.485856196 | -2.567291436 | 0.408686988  |

|      |               |              |              |
|------|---------------|--------------|--------------|
| H220 | 0.354155894   | -6.845166914 | -6.129194998 |
| H221 | -2.360169845  | -4.567310012 | 0.273125821  |
| H222 | -3.672719180  | 3.233942405  | 2.751686168  |
| H223 | -2.664966775  | 0.963571246  | 1.550106598  |
| H224 | -7.832516195  | 1.556054193  | 4.176787103  |
| H225 | -7.153547394  | 0.106386907  | 1.652714466  |
| H226 | -6.860779408  | 4.453237431  | 1.931373326  |
| H227 | -8.255687145  | 9.411290476  | 3.044503298  |
| H228 | -6.723507022  | 6.224195769  | 4.563911411  |
| H229 | -8.839192720  | 5.968299376  | 2.800251703  |
| H230 | -6.260204251  | 7.239940254  | 1.691094092  |
| H231 | -11.010949179 | 9.477533562  | -0.171323121 |
| H232 | -3.283170312  | 4.439024790  | 0.599869717  |
| H233 | -4.875826858  | 3.947351412  | 0.005247103  |
| H234 | -9.867570845  | 10.831178868 | 1.665904404  |
| H235 | -8.379270088  | 5.838743922  | 1.100696851  |
| H236 | -6.107275929  | 2.239740019  | 1.399680757  |
| H237 | -6.727452577  | 0.180879395  | 4.109449371  |
| H238 | -9.880678099  | 1.760861300  | 0.135931557  |
| H239 | -2.589948774  | 0.743951718  | -2.695180467 |
| H240 | -10.192988530 | 0.087872173  | 0.638247626  |
| H241 | 10.333725097  | 3.776296006  | 1.259575130  |
| H242 | 8.709879530   | 3.794731158  | 1.075265535  |
| H243 | 1.192978880   | 5.490413954  | -2.742606934 |
| H244 | -0.962710625  | 5.401526446  | -0.823298511 |
| H245 | 1.452473596   | 7.882817206  | -1.565259317 |
| H246 | -3.795391701  | 2.971490938  | -2.040196627 |
| H247 | -5.434062738  | 3.357847257  | -3.225650138 |
| H248 | -7.038239840  | 2.220609527  | -4.298073359 |
| H249 | -5.090426434  | 4.784363310  | -2.609620640 |
| H250 | -5.788256884  | 0.204950676  | -3.752795818 |
| H251 | -7.553960626  | 0.226148414  | -3.460070483 |
| H252 | -0.519087696  | 10.835106289 | -4.409039476 |
| H253 | -1.703458237  | 12.155039020 | -4.436472007 |
| H254 | -1.472094983  | 9.098763254  | -5.435019165 |
| H255 | -3.146065176  | 8.601764602  | -5.163943495 |
| H256 | -4.392253345  | 7.458137464  | -7.646362685 |
| H257 | -3.226364966  | 3.314221468  | -6.451328556 |
| H258 | -7.577191332  | 8.232912265  | -1.882952560 |
| H259 | -3.172925051  | 8.780413453  | 0.364286122  |
| H260 | -5.061895964  | 6.827783852  | -4.233698936 |
| H261 | 0.592053625   | 4.299568271  | -5.011491027 |
| H262 | 1.837687475   | 6.255422922  | -4.789857831 |
| H263 | -1.799742481  | 3.844234374  | -4.240772781 |
| H264 | -8.448854831  | -0.616366171 | -0.708992077 |
| H265 | 2.995123045   | 8.803607621  | -6.473773374 |
| H266 | -6.282875998  | -1.720094154 | -2.212473339 |
| H267 | -0.038619167  | 4.963488349  | -6.515056423 |
| H268 | -3.571459259  | 6.828037057  | -1.074839767 |
| H269 | 2.772071690   | 9.464068134  | -4.840971948 |
| H270 | -3.710101252  | 5.900523400  | -7.990230142 |
| H271 | -5.635298829  | 7.655225563  | -5.640402033 |
| H272 | -5.399042879  | -4.311568710 | -2.018495990 |
| H273 | -5.776469797  | -3.484293767 | 0.540063834  |
| H274 | -7.125893617  | 10.272208081 | -0.549002792 |
| H275 | -5.375945561  | 0.908743252  | -1.410238425 |
| H276 | -1.035564432  | 6.887751305  | -5.304071423 |
| H277 | -2.374066450  | 4.715120179  | -7.104283127 |
| H278 | -1.156433417  | 2.915192643  | -5.587214051 |
| H279 | -4.006862651  | 4.802913847  | -4.572260379 |
| H280 | 0.713460469   | 9.345083981  | 0.837099083  |
| H281 | -0.722153871  | 9.488878477  | -2.033148514 |
| H282 | -0.386551262  | 12.337009125 | -2.466180052 |
| H283 | 2.115396013   | 9.619295246  | -0.225631405 |
| H284 | -2.632953799  | 10.707475485 | -0.548030824 |
| H285 | 3.955586187   | -4.978876181 | -8.494480600 |
| H286 | 4.066771058   | -6.177138986 | -7.191336674 |
| H287 | 7.569210852   | -6.166913462 | -4.302447194 |
| H288 | 4.302072230   | -7.294603052 | -9.282582408 |
| H289 | 2.802257052   | -7.676603742 | -8.747534308 |
| H290 | 5.146474100   | 4.479421009  | -2.242112062 |
| H291 | 5.586694853   | 7.428373489  | -1.580694316 |
| H292 | 4.242378325   | 7.048126402  | -5.593298639 |
| H293 | 3.877341315   | 5.553244467  | -1.560940574 |
| H294 | 6.527784448   | 7.695840341  | -2.893110380 |
| H295 | 4.785992780   | 1.165829133  | -7.549149844 |
| H296 | 5.472352484   | 5.998325683  | -4.142631051 |
| H297 | 5.772837182   | -5.562243597 | 5.956876939  |
| H298 | 7.404572659   | -7.007136822 | 3.800321258  |
| H299 | 3.050192548   | -0.252791865 | -7.184973053 |
| H300 | 5.137386154   | 0.831292556  | 2.908004250  |
| H301 | 0.600386286   | -1.016760218 | 0.470962446  |

|       |              |               |               |
|-------|--------------|---------------|---------------|
| H302  | -0.120096616 | -0.475362830  | -8.709336832  |
| H303  | -1.622752372 | -3.277002936  | -3.364468226  |
| H304  | -0.220765349 | 0.440164597   | -7.204740749  |
| H305  | 4.656375434  | -3.296829676  | 4.982103452   |
| H306  | 1.560770513  | -1.363902089  | -6.386949841  |
| H307  | 4.323479643  | -4.166447171  | 3.486817423   |
| H308  | 5.174756716  | -6.222756801  | 4.418247705   |
| H309  | 6.785395702  | -4.610294429  | 3.207378910   |
| H310  | 7.093485619  | -3.834902583  | 4.771393482   |
| H311  | -5.658564775 | -2.312069858  | -5.633099305  |
| H312  | 6.472236916  | -7.938610642  | 6.491631206   |
| H313  | 5.604844039  | -10.731144785 | 5.565816708   |
| H314  | -0.219650766 | -1.224872381  | -3.615233824  |
| H315  | 7.089817649  | -9.929402842  | 7.947447774   |
| H316  | 5.538974484  | -10.437171559 | 7.805793985   |
| H317  | 5.628940634  | -2.525897063  | 2.254070871   |
| H318  | -1.088759900 | 0.722630300   | -4.861843089  |
| H319  | -3.852179716 | -3.394752942  | -4.444337258  |
| H320  | 7.679061166  | -10.048362873 | 0.146582303   |
| H321  | 6.443281553  | -8.211664680  | -2.312026932  |
| H322  | 6.735865375  | -7.982787022  | 1.329161346   |
| H323  | 6.730485679  | -10.869065679 | -0.766312576  |
| H324  | 4.027630724  | 0.483263387   | -10.152540770 |
| H325  | 6.452182142  | -4.927386826  | 0.437481174   |
| H326  | 2.453420119  | -7.238719657  | 2.466037802   |
| H327  | 2.770760844  | -3.642347546  | -7.083133249  |
| H328  | 3.084758102  | -9.034090013  | 1.122780570   |
| H329  | 2.653800982  | -8.340940643  | -5.345922609  |
| H330  | 1.931061301  | -6.445436964  | -3.828180027  |
| H331  | 7.282381438  | -11.135210234 | 5.948934003   |
| H332  | 5.363251022  | -0.361598760  | 1.651548940   |
| H333  | 8.541557777  | -5.478410193  | 1.450563372   |
| H334  | 7.385944665  | -3.732045534  | 0.103937598   |
| H335  | 9.338267187  | -6.002576761  | 3.615805016   |
| H336  | 4.514072654  | -1.454604557  | 5.504003033   |
| H337  | 3.640065190  | -8.809681953  | -1.882030319  |
| H338  | 4.912754119  | -8.826566087  | -0.657608759  |
| H339  | 1.873517769  | -8.817675125  | -0.148286489  |
| H340  | 0.971301748  | -3.438812711  | -5.442940235  |
| H341  | -3.326522589 | 0.600477176   | -5.988967301  |
| H342  | -5.563184755 | -0.608975584  | -6.150885895  |
| H343  | 2.465130428  | -5.571066114  | 1.861515410   |
| H344  | 8.675123758  | -7.017702852  | 1.637888217   |
| H345  | 7.583131460  | -8.843549357  | 2.301122020   |
| H346  | 4.256730820  | 0.130657791   | 4.963586904   |
| H347  | 5.139984826  | -8.907063401  | -5.066202344  |
| H348  | 6.382317667  | -6.467985464  | -2.098811748  |
| H349  | 0.000191658  | -4.534330590  | -6.465008143  |
| H350  | 3.629512228  | 2.477823080   | -7.872407235  |
| H351  | 7.950073321  | 1.050885448   | 3.344742366   |
| H352  | 7.872472327  | 1.045573534   | 1.568345316   |
| H353  | 8.580749238  | -8.045862003  | -5.299418211  |
| H354  | 7.903526794  | -9.093584868  | -4.241142510  |
| H355  | 10.338173398 | -8.721578386  | -0.454677955  |
| H356  | 8.460590629  | -8.692347733  | -1.744254770  |
| H357  | 11.543280558 | -8.132666291  | -2.848896211  |
| H358  | 10.173854235 | -6.955979245  | -0.350273055  |
| H359  | 10.558430219 | 0.796334409   | 1.403948453   |
| H360  | -3.064261512 | 13.681375857  | 0.828729436   |
| H361  | 10.732571924 | -5.389337299  | 6.212689682   |
| H362  | 10.024541015 | -3.291215061  | 4.596845738   |
| H363  | -4.934480003 | 12.253135781  | -1.062826001  |
| H364  | -4.102989752 | 10.824181624  | 1.537521315   |
| H365  | -5.733340747 | 11.406556353  | 1.154445787   |
| H366  | -6.749933791 | 6.214971267   | -2.573920581  |
| H367  | -1.865446220 | -0.348661467  | -0.528166582  |
| Mo368 | 3.655060750  | -4.694496464  | -1.574671008  |
| N369  | -6.932235811 | -7.135912262  | 2.012697231   |
| N370  | -8.520193015 | -4.155668711  | 3.626419945   |
| N371  | -7.537712329 | -3.730046944  | 6.226774463   |
| N372  | -4.838281345 | -4.531119327  | 6.118333755   |
| N373  | -3.736149956 | -2.469598074  | 4.519976305   |
| N374  | -4.104610295 | -0.245705245  | 6.302274888   |
| N375  | -2.828254601 | -0.990785134  | 8.810215190   |
| N376  | -0.398960553 | -2.369967035  | 8.175914932   |
| N377  | 0.795817132  | -1.331967703  | 5.760327010   |
| N378  | 0.688695253  | 1.624317502   | 5.869971124   |
| N379  | 0.584223979  | 2.235051283   | 8.786828156   |
| N380  | 6.251792210  | -9.852335096  | 7.366794484   |
| N381  | 6.826044754  | -7.977939782  | 5.530130079   |
| N382  | 5.346888017  | -2.366829567  | 3.223479530   |
| N383  | 0.192900418  | 1.860324881   | -1.157630891  |

|      |              |              |               |
|------|--------------|--------------|---------------|
| N384 | -0.414073316 | 2.762030585  | -0.922879771  |
| N385 | 4.810609905  | -0.735730758 | 4.842898945   |
| N386 | 5.083822613  | -0.144223077 | 2.624700244   |
| N387 | 9.471109424  | -5.861257834 | 4.641589941   |
| N388 | -6.037524764 | -3.611064476 | -1.597213399  |
| N389 | -2.096573620 | -6.234501771 | -1.586719262  |
| N390 | -6.207239488 | -1.005994693 | -1.467297825  |
| N391 | -8.410524351 | 0.350813957  | -0.395097749  |
| N392 | -7.691896333 | 0.690778742  | 2.301485887   |
| N393 | -5.560709353 | 2.512163208  | 2.221865192   |
| N394 | -3.386514230 | 2.268876769  | -1.363320029  |
| N395 | -2.467788358 | 0.490516474  | -0.552121251  |
| N396 | -6.248885484 | 5.202327073  | 2.245392256   |
| N397 | -9.854696080 | 7.824132876  | 0.589356737   |
| N398 | -9.706949041 | 9.840972880  | 1.502290128   |
| N399 | 9.514331014  | 3.169259173  | 1.177005715   |
| N400 | 6.037472370  | 6.961959189  | -2.374260763  |
| N401 | 3.688971492  | 7.584499749  | -4.930082200  |
| N402 | 1.025650404  | 6.837256820  | -5.026482154  |
| N403 | -3.678526715 | 5.121109497  | -5.501111507  |
| N404 | -4.067399158 | 6.558638428  | -7.307813996  |
| N405 | -4.923647564 | 7.063371405  | -5.219280706  |
| N406 | 0.295415652  | 5.896899073  | -2.419109196  |
| N407 | 0.730246715  | 8.217895783  | -0.922441644  |
| N408 | -0.616132389 | 10.448776782 | -1.706697525  |
| N409 | -2.421911056 | 9.315864654  | -5.106946377  |
| N410 | -2.941290870 | 11.655132167 | -0.750824925  |
| N411 | 3.370838236  | -6.907121459 | -9.113705489  |
| N412 | 1.947520097  | -4.248758347 | -7.113068914  |
| N413 | 0.827697484  | -1.390665386 | -7.111577789  |
| N414 | 2.838557981  | 0.509694044  | -7.835519182  |
| N415 | -2.328283908 | -5.251395934 | -8.892805700  |
| N416 | -3.855709673 | -3.141862291 | -7.705101578  |
| N417 | 7.748570810  | -8.202884570 | -4.723610637  |
| N418 | 3.992910070  | -6.422211200 | -3.193804241  |
| N419 | 3.290443881  | -7.834054730 | -4.736852050  |
| N420 | 9.114808937  | -7.927017009 | -1.925109348  |
| O421 | -6.317819473 | -4.680728731 | 3.387633617   |
| O422 | -6.681433486 | -1.724585878 | 5.556840159   |
| O423 | -4.456782231 | -3.393201794 | 8.062040059   |
| O424 | -1.782284233 | -2.781531895 | 5.643036069   |
| O425 | -2.240876571 | 0.641272925  | 5.328813993   |
| O426 | -2.176936172 | 1.198923816  | 8.899199303   |
| O427 | 0.453745688  | -1.679895506 | 10.194985456  |
| O428 | 2.816489876  | -2.061439319 | 6.568060256   |
| O429 | 2.879182270  | 1.364952263  | 5.277744347   |
| O430 | 2.360014683  | 3.546187731  | 8.257524450   |
| O431 | 2.959701230  | 2.237012925  | 11.479251621  |
| O432 | 7.472808286  | -9.529868939 | 3.942707403   |
| O433 | 8.538474994  | -6.021180918 | 6.736304155   |
| O434 | 12.062748399 | -3.380929457 | 4.616794660   |
| O435 | -5.595715718 | -0.865162855 | 0.740364961   |
| O436 | -3.977152631 | -5.326467318 | -2.486965216  |
| O437 | -7.175066284 | 2.271758434  | -0.373223519  |
| O438 | -6.632346944 | 2.099827487  | -3.420949133  |
| O439 | -9.585395531 | 1.935545046  | 2.658825097   |
| O440 | -5.290762428 | 2.380947240  | 4.486397325   |
| O441 | -4.144760188 | 5.753440983  | 2.941654041   |
| O442 | -6.414663155 | 8.192844834  | 4.120868390   |
| O443 | 11.027489792 | 0.912700189  | 3.3871140547  |
| O444 | 3.607957793  | 5.372468206  | 2.539913289   |
| O445 | 3.276086629  | 8.034301406  | -2.732495741  |
| O446 | 0.380630532  | 8.912446185  | -5.782156978  |
| O447 | -1.840749673 | 6.505438766  | -2.967382794  |
| O448 | -0.893626580 | 7.529228093  | 0.548508245   |
| O449 | 2.201760525  | 5.985024177  | 0.113697830   |
| O450 | 0.689131148  | 11.818075492 | -0.408212133  |
| O451 | -2.770951765 | 13.347733176 | -2.270288926  |
| O452 | -3.682542505 | 10.396659692 | -3.536633539  |
| O453 | -5.058866323 | 14.119511511 | 0.782598626   |
| O454 | -5.794214353 | 6.289712974  | -2.385687307  |
| O455 | 1.186369968  | -6.381654257 | -7.496535633  |
| O456 | -0.846260467 | -2.682184069 | -7.996409594  |
| O457 | 1.301315723  | 1.696085700  | -9.024413671  |
| O458 | 4.931502995  | 2.314098550  | -10.148678309 |
| O459 | -5.554157571 | -4.658211751 | -7.578691577  |
| O460 | -1.766549527 | -7.865161022 | -4.146220200  |
| O461 | 0.053725951  | -7.146781008 | -5.217158304  |
| O462 | -4.548516820 | 0.293989989  | -8.308238443  |
| O463 | 9.701228790  | -6.038082907 | -3.032968538  |
| O464 | 12.580239416 | -7.178663933 | -1.372841052  |
| O465 | 0.279677647  | -6.268506194 | 0.182639518   |

|                                                                                     |      |              |                              |              |
|-------------------------------------------------------------------------------------|------|--------------|------------------------------|--------------|
|                                                                                     | O466 | -0.105195994 | -6.844097820                 | 2.323671975  |
|                                                                                     | O467 | 5.040217176  | -11.280102589                | -1.069413966 |
|                                                                                     | O468 | 2.787584183  | -11.306079178                | -0.865766065 |
|                                                                                     | O469 | 5.007608147  | -5.811562361                 | -0.254942300 |
|                                                                                     | O470 | 5.129428884  | -7.197513556                 | 1.510535330  |
|                                                                                     | O471 | 2.506981844  | -6.303083759                 | -0.777521688 |
|                                                                                     | O472 | 9.145367052  | -6.162042832                 | 1.835025227  |
|                                                                                     | O473 | 7.179450279  | -4.366920223                 | 0.814282582  |
|                                                                                     | O474 | -4.691419920 | 4.000862646                  | -3.065326051 |
|                                                                                     | O475 | 7.702139739  | -10.725349436                | -0.566334720 |
|                                                                                     | O476 | 7.614365678  | -8.440174682                 | 1.395971043  |
|                                                                                     | S477 | 3.070376890  | 4.369367059                  | -3.526248803 |
|                                                                                     | S478 | 1.600361258  | 1.059786592                  | -3.853858900 |
|                                                                                     | S479 | 1.830733526  | -3.910014250                 | -2.955915879 |
|                                                                                     | S480 | 3.181366401  | 1.731457491                  | -0.608369671 |
|                                                                                     | S481 | 0.365718006  | -1.355404826                 | -0.821958158 |
|                                                                                     | S482 | 3.764689982  | -1.809454973                 | -5.450468985 |
|                                                                                     | S483 | 3.293868177  | -3.248944661                 | 0.342850993  |
|                                                                                     | S484 | 5.205914815  | 1.207457105                  | -3.526460442 |
|                                                                                     | S485 | 5.522203916  | -3.666377780                 | -2.629728227 |
|                                                                                     | S486 | 6.143736359  | -0.769571124                 | -0.395388865 |
|                                                                                     | end  |              |                              |              |
| <b>rest-S2BH-6Hx</b><br><b>2N2 associated</b><br><b>35, S=1</b>                     |      |              |                              |              |
| <b>Fe (139) -2.278</b>                                                              |      |              |                              |              |
| <b>Fe (140) -1.093</b>                                                              |      |              |                              |              |
| <b>Fe (141) -2.731</b>                                                              |      |              |                              |              |
| <b>Fe (142) 2.734</b>                                                               |      |              |                              |              |
| <b>Fe (143) 2.695</b>                                                               |      |              |                              |              |
| <b>Fe (144) 2.005</b>                                                               |      |              |                              |              |
| <b>Fe (145) 0.321</b>                                                               |      |              |                              |              |
| 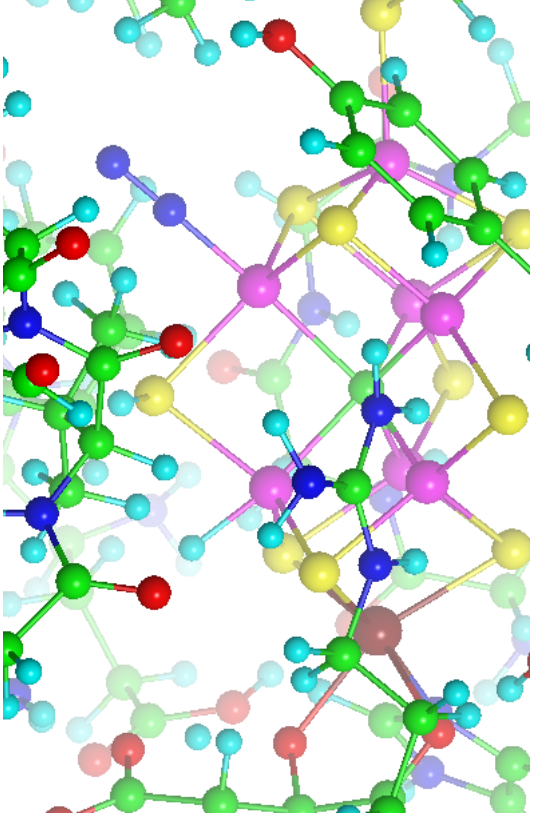 |      |              |                              |              |
|                                                                                     |      |              | <b>bm522bh2n2x6x1a.car_1</b> |              |
|                                                                                     | C1   | -8.140429240 | -5.159439932                 | 0.145678781  |
|                                                                                     | C2   | -8.510999831 | -6.283566527                 | -0.828792626 |
|                                                                                     | C3   | -8.922252439 | -3.137403263                 | 1.293083813  |
|                                                                                     | C4   | -8.421357488 | -3.390991496                 | 2.710888494  |
|                                                                                     | C5   | -8.314110697 | -4.910859415                 | 4.619546733  |
|                                                                                     | C6   | -6.793100544 | -5.043567680                 | 4.732538670  |
|                                                                                     | C7   | -4.680693839 | -5.520767205                 | 3.611952348  |
|                                                                                     | C8   | -4.046876183 | -4.127653942                 | 3.621421810  |
|                                                                                     | C9   | -4.201320832 | -1.809725835                 | 2.852500282  |
|                                                                                     | C10  | -4.282214652 | -1.134516018                 | 4.230866624  |
|                                                                                     | C11  | -5.562839756 | -0.756095932                 | 6.254006288  |
|                                                                                     | C12  | -4.711134729 | -1.394569108                 | 7.358831373  |
|                                                                                     | C13  | -4.089455697 | -3.458678420                 | 8.515807006  |
|                                                                                     | C14  | -2.607657970 | -3.822284644                 | 8.362544549  |
|                                                                                     | C15  | -0.842926329 | -4.586121323                 | 6.829439215  |
|                                                                                     | C16  | 0.121126687  | -3.583680112                 | 6.190581836  |
|                                                                                     | C17  | 0.314276993  | -1.529984983                 | 4.785981015  |
|                                                                                     | C18  | 0.504773724  | -0.337081334                 | 5.751035347  |
|                                                                                     | C19  | -0.356719032 | -1.132097610                 | 3.453872996  |
|                                                                                     | C20  | 0.295439934  | 0.108905543                  | 2.824654208  |
|                                                                                     | C21  | -0.352878837 | -2.320440198                 | 2.484532555  |
|                                                                                     | C22  | -0.596469043 | 1.457417074                  | 7.046420552  |
|                                                                                     | C23  | -0.490485505 | 1.069381174                  | 8.536405875  |
|                                                                                     | C24  | -1.804194778 | 2.387190283                  | 6.767153418  |
|                                                                                     | C25  | -1.857640941 | 3.540757997                  | 7.776450743  |
|                                                                                     | C26  | -1.759464431 | 2.927793375                  | 5.332151372  |
|                                                                                     | C27  | -1.439223040 | -0.087007455                 | 10.449640087 |
|                                                                                     | C28  | -0.077665709 | -0.443737402                 | 11.009568331 |
|                                                                                     | C29  | 4.930776794  | -11.789735184                | 4.740142956  |
|                                                                                     | C30  | 5.606512072  | -10.525965632                | 4.207978960  |
|                                                                                     | C31  | 5.861591386  | -8.082455902                 | 4.651205439  |
|                                                                                     | C32  | 6.944505097  | -7.735491229                 | 5.691140287  |
|                                                                                     | C33  | 4.707658733  | -7.064671334                 | 4.676307209  |
|                                                                                     | C34  | 5.161370234  | -5.635199705                 | 4.376164519  |
|                                                                                     | C35  | 3.971358203  | -4.701248702                 | 4.155958659  |
|                                                                                     | C36  | 4.131184380  | -2.188156098                 | 4.293879336  |
|                                                                                     | C37  | 9.237012341  | -6.935805729                 | 6.018974568  |
|                                                                                     | C38  | 9.547861026  | -5.455794833                 | 6.050062758  |
|                                                                                     | C39  | -5.234793755 | -2.551175331                 | -2.296069714 |
|                                                                                     | C40  | -5.608346701 | -1.108631927                 | -1.907071882 |
|                                                                                     | C41  | -3.727516376 | -2.742921601                 | -2.010042251 |
|                                                                                     | C42  | -3.213932602 | -4.196117975                 | -2.048957779 |
|                                                                                     | C43  | -2.741966570 | -4.689585076                 | -3.416117188 |
|                                                                                     | C44  | -5.867026388 | 1.154093881                  | -2.853655873 |
|                                                                                     | C45  | -7.089000529 | 1.640006879                  | -2.062207052 |
|                                                                                     | C46  | -5.781471683 | 1.771080061                  | -4.256796232 |
|                                                                                     | C47  | -9.379483683 | 1.157958382                  | -1.336751933 |
|                                                                                     | C48  | -9.180261358 | 1.215034277                  | 0.181935644  |
|                                                                                     | C49  | -7.739045168 | 0.658777123                  | 2.089209626  |
|                                                                                     | C50  | -6.571204019 | 1.572512568                  | 2.459115905  |
|                                                                                     | C51  | -4.896076232 | 3.207509139                  | 1.754482210  |
|                                                                                     | C52  | -5.412985153 | 4.526586124                  | 2.376322117  |
|                                                                                     | C53  | -4.110730045 | 3.617444575                  | 0.501070543  |
|                                                                                     | C54  | -3.388599182 | 2.531395300                  | -0.225286547 |
|                                                                                     | C55  | -2.991678834 | 1.259324413                  | 0.102777790  |
|                                                                                     | C56  | -2.306407231 | 1.665556664                  | -1.976936154 |
|                                                                                     | C57  | -7.197239080 | 6.223543111                  | 2.235172589  |
|                                                                                     | C58  | -7.368396714 | 6.371590848                  | 3.746848399  |

|       |               |               |              |
|-------|---------------|---------------|--------------|
| C59   | -8.564545482  | 6.320894711   | 1.518875285  |
| C60   | -9.117333192  | 7.701250819   | 1.312861300  |
| C61   | -9.110178516  | 8.811093960   | 2.134871982  |
| C62   | -10.146580965 | 9.268229223   | 0.231066875  |
| C63   | 8.587209410   | 1.287504169   | 4.882975839  |
| C64   | 9.592627855   | 0.153648958   | 4.859714606  |
| C65   | 7.214617991   | 0.685911281   | 4.490885594  |
| C66   | 6.100203671   | 1.709573899   | 4.515996901  |
| C67   | 5.346872213   | 1.945717298   | 5.681186723  |
| C68   | 5.784963515   | 2.469168108   | 3.373695936  |
| C69   | 4.314863939   | 2.892596157   | 5.709934473  |
| C70   | 4.771600216   | 3.430983409   | 3.390089668  |
| C71   | 4.027699787   | 3.633900670   | 4.557378386  |
| C72   | 5.671930363   | 6.621705315   | -0.485976591 |
| C73   | 4.707727400   | 7.755589230   | -0.876813316 |
| C74   | 4.892717925   | 5.342471906   | -0.196353284 |
| C75   | 4.026931484   | 9.352564856   | -2.629009988 |
| C76   | 2.571250808   | 9.029833563   | -2.972988319 |
| C77   | 0.894876756   | 7.202937273   | -3.196522824 |
| C78   | 0.195038278   | 6.889724025   | -1.848430506 |
| C79   | 1.016052985   | 5.947563052   | -4.093445812 |
| C80   | -0.237402806  | 5.116763649   | -4.392379516 |
| C81   | -1.220672925  | 5.690957805   | -5.425391637 |
| C82   | -2.732066576  | 7.667074769   | -5.162148202 |
| C83   | 0.331451378   | 5.984261536   | 0.420756721  |
| C84   | 0.097636585   | 7.237172986   | 1.277313533  |
| C85   | 1.162207887   | 4.998475152   | 1.267390441  |
| C86   | 1.179288835   | 9.258398740   | 2.133247139  |
| C87   | 0.592452328   | 10.603242303  | 1.737582731  |
| C88   | -0.557812210  | 11.874808133  | 0.014090459  |
| C89   | -1.894941406  | 12.484236394  | 0.506755433  |
| C90   | -0.506267198  | 11.879273897  | -1.516771465 |
| C91   | -1.583687627  | 11.022442748  | -2.165541171 |
| C92   | -4.040860557  | 12.083396306  | 1.633602110  |
| C93   | -4.083724974  | 13.184574179  | 2.685218202  |
| C94   | -4.813172759  | 10.830558209  | 2.135725409  |
| C95   | -4.936729886  | 9.759999993   | 1.073112982  |
| C96   | -6.009650942  | 9.779194323   | 0.167119120  |
| C97   | -3.965229698  | 8.756980619   | 0.922409985  |
| C98   | -6.102127734  | 8.844090481   | -0.866800926 |
| C99   | -4.024415474  | 7.831311199   | -0.124920110 |
| C100  | -5.095227713  | 7.889566925   | -1.012213484 |
| C101  | 5.220041316   | -4.079821462  | -8.197090837 |
| C102  | 3.745090814   | -3.796911305  | -7.974519068 |
| C103  | 2.133413657   | -2.248009103  | -6.891500628 |
| C104  | 1.753875651   | -0.880048283  | -7.470512613 |
| C105  | 2.216160991   | 1.530886820   | -7.367813900 |
| C106  | 3.423875029   | 2.464864487   | -7.336268661 |
| C107  | 5.618955143   | 3.044162619   | -6.451899082 |
| C108  | 6.494931569   | 3.121686103   | -7.688648279 |
| C109  | -1.524010912  | -3.443203825  | -9.394052796 |
| C110  | -2.563119268  | -2.330671085  | -9.211536923 |
| C111  | -1.259377164  | -4.140395922  | -8.039891235 |
| C112  | -0.546656163  | -5.491168215  | -8.239298247 |
| C113  | -0.043995706  | -6.026431174  | -6.918073908 |
| C114  | -2.992155314  | 0.003304465   | -8.606296494 |
| C115  | -2.398073674  | 1.278482877   | -9.172414262 |
| C116  | -3.527370733  | 0.128743458   | -7.157421374 |
| C117  | -2.420410176  | 0.066504973   | -6.138253845 |
| C118  | -1.672854180  | 1.210563568   | -5.811640715 |
| C119  | -2.0411111632 | -1.169488757  | -5.583543989 |
| C120  | -0.542083908  | 1.108961716   | -4.994280573 |
| C121  | -0.907981287  | -1.271522484  | -4.770660706 |
| C122  | -0.142095904  | -0.135151739  | -4.493622900 |
| C123  | 8.262313332   | -6.470117429  | -3.495909331 |
| C124  | 9.294492955   | -6.612866706  | -2.365914172 |
| C125  | 6.848604444   | -6.811220259  | -2.997931895 |
| C126  | 5.727641939   | -6.548342973  | -3.953083616 |
| C127  | 5.537132069   | -7.125869429  | -5.191065123 |
| C128  | 3.748737234   | -5.935689451  | -4.659511731 |
| C129  | 10.204326178  | -7.893378615  | -0.516157869 |
| C130  | 11.635660959  | -7.673134196  | -0.950517759 |
| C131  | 0.339094010   | -6.947374295  | -0.073390520 |
| C132  | 1.768017073   | -7.052125480  | 0.449132884  |
| C133  | 2.853574564   | -7.198563863  | -0.656480360 |
| C134  | 2.816491989   | -8.634411824  | -1.244968233 |
| C135  | 3.991669414   | -9.006450050  | -2.153391825 |
| C136  | 4.012053903   | -10.493790137 | -2.569866854 |
| C137  | 4.238252089   | -6.969896859  | -0.028528264 |
| C138  | 3.737843255   | -0.871739681  | -1.536542788 |
| Fe139 | 4.165447303   | -2.124304785  | -3.043422843 |
| Fe140 | 2.162835813   | 0.654820857   | -1.051590140 |

|  |       |               |              |               |
|--|-------|---------------|--------------|---------------|
|  | Fe141 | 4.984400218   | 0.271479817  | -0.434155883  |
|  | Fe142 | 4.301205655   | 0.395349562  | -2.939002223  |
|  | Fe143 | 4.062351816   | 2.524148653  | -1.380551935  |
|  | Fe144 | 4.755429549   | -2.243075987 | -0.561339122  |
|  | Fe145 | 2.345201766   | -2.364403584 | -1.223409157  |
|  | H146  | -6.797820943  | -7.380720533 | -0.689417104  |
|  | H147  | -6.815006807  | -6.362781757 | -1.963740905  |
|  | H148  | -10.062777031 | -4.425484042 | 0.032547671   |
|  | H149  | -9.144185211  | -5.859475288 | -1.625107717  |
|  | H150  | -9.150915572  | -6.996094460 | -0.280368845  |
|  | H151  | -8.167653668  | -2.502853757 | 0.804683058   |
|  | H152  | -9.353986651  | -5.212113486 | 2.757896896   |
|  | H153  | -9.857510082  | -2.565149769 | 1.355013060   |
|  | H154  | -8.776921781  | -5.863587505 | 4.909489707   |
|  | H155  | -6.640744678  | -5.604074364 | 2.751063116   |
|  | H156  | -8.620693856  | -4.147366581 | 5.346902993   |
|  | H157  | -3.153831381  | -1.756002756 | 2.531989666   |
|  | H158  | -5.501685183  | -3.433373365 | 2.345641409   |
|  | H159  | -4.352522742  | -6.060497633 | 2.713569592   |
|  | H160  | -5.279888600  | 0.302582619  | 6.201799364   |
|  | H161  | -6.174164316  | -1.898702516 | 4.530634894   |
|  | H162  | -4.301604625  | -6.053400533 | 4.492165754   |
|  | H163  | -4.816332607  | -1.258160974 | 2.127040340   |
|  | H164  | -5.286500729  | -3.287183212 | 6.752244731   |
|  | H165  | -6.620782487  | -0.823381864 | 6.542801498   |
|  | H166  | -0.811070256  | -3.215813472 | 2.927182635   |
|  | H167  | -0.926899396  | -2.081662013 | 1.574938336   |
|  | H168  | 0.673797900   | -2.573147320 | 2.174858380   |
|  | H169  | -1.400801186  | -0.874314443 | 3.694909874   |
|  | H170  | -4.638399013  | -4.397787447 | 8.678475031   |
|  | H171  | -1.776602223  | 2.122709400  | 4.584662084   |
|  | H172  | -2.199789711  | -0.125867105 | 8.464513559   |
|  | H173  | -1.972945833  | 3.184442569  | 8.810198409   |
|  | H174  | 1.194807975   | -0.150236709 | 2.246400704   |
|  | H175  | 0.592782004   | 0.860435690  | 3.569916633   |
|  | H176  | 8.499416385   | 1.634519114  | 5.928826660   |
|  | H177  | -2.626956844  | 3.578237597  | 5.147100877   |
|  | H178  | -2.710159830  | 4.197918229  | 7.550394442   |
|  | H179  | -0.847428384  | 3.525856961  | 5.172173092   |
|  | H180  | -0.939794998  | 4.147625805  | 7.727712899   |
|  | H181  | -2.723547957  | 1.785127694  | 6.885383964   |
|  | H182  | 0.337005778   | 1.999390656  | 6.836914086   |
|  | H183  | -1.530295322  | -0.004335295 | 5.782628448   |
|  | H184  | -0.414043346  | 0.605917977  | 2.145473842   |
|  | H185  | 1.538513868   | 4.195822672  | 0.616974472   |
|  | H186  | 0.476098333   | 4.556774050  | 2.006024977   |
|  | H187  | 2.387513257   | 5.231568216  | 2.791098465   |
|  | H188  | 2.557231506   | 4.608613984  | 5.369301246   |
|  | H189  | 4.529182741   | 4.004562983  | 2.494450620   |
|  | H190  | 6.326275890   | 2.299850496  | 2.440374764   |
|  | H191  | 5.557745395   | 1.367293401  | 6.583567645   |
|  | H192  | -1.451182780  | -2.607781443 | 5.327137255   |
|  | H193  | -0.885377735  | -5.465329816 | 6.167571275   |
|  | H194  | -0.389385601  | -4.897733601 | 7.778078616   |
|  | H195  | -2.850236824  | -4.093864815 | 6.321459886   |
|  | H196  | -4.168388387  | -2.852232212 | 9.426294095   |
|  | H197  | 3.725416982   | 3.038333730  | 6.619750230   |
|  | H198  | 1.319640839   | -1.917010350 | 4.587882904   |
|  | H199  | -1.851463366  | 0.757414725  | 11.027048738  |
|  | H200  | -2.090692065  | -0.961501367 | 10.605348797  |
|  | H201  | 0.607638426   | -0.961602984 | 10.300236413  |
|  | H202  | 10.140176621  | -7.491086459 | 5.720911830   |
|  | H203  | -1.385644066  | -5.943974667 | -4.297622995  |
|  | H204  | 1.227404235   | -6.119522108 | -1.573529807  |
|  | H205  | -1.254893629  | -6.218943537 | -8.659524366  |
|  | H206  | 0.289195924   | -5.375254521 | -8.944965659  |
|  | H207  | -2.209093719  | -4.308684105 | -7.509302829  |
|  | H208  | -1.707679377  | 1.119707293  | -10.032978274 |
|  | H209  | -2.036143641  | -4.171209307 | -10.039182407 |
|  | H210  | -3.160955619  | -2.124751927 | -2.726416571  |
|  | H211  | -4.006283899  | -4.885935532 | -1.711479489  |
|  | H212  | -1.089054367  | -0.984513845 | -8.639647456  |
|  | H213  | -3.866898989  | -0.197817408 | -9.254295960  |
|  | H214  | 0.273208546   | -2.413217984 | -9.533089655  |
|  | H215  | -1.209022409  | -5.815003207 | -2.552368881  |
|  | H216  | -0.657020160  | -3.470705855 | -7.406793243  |
|  | H217  | 0.194979912   | -3.766139679 | -10.469755638 |
|  | H218  | -6.461136159  | -3.263552577 | -3.802503294  |
|  | H219  | -3.538855223  | -2.343963409 | -1.002371662  |
|  | H220  | 1.740602753   | -5.328394234 | -7.370366864  |
|  | H221  | -2.393651594  | -4.307375647 | -1.324687623  |
|  | H222  | -4.233129749  | 2.758395707  | 2.507639624   |

|      |               |              |              |
|------|---------------|--------------|--------------|
| H223 | -3.133313869  | 0.685006264  | 1.008269327  |
| H224 | -8.618576448  | 1.035477044  | 2.629365016  |
| H225 | -7.414428038  | 0.128393497  | 0.047503602  |
| H226 | -7.183849504  | 4.266520689  | 1.372196670  |
| H227 | -8.690997061  | 8.988833399  | 3.119657114  |
| H228 | -7.654800283  | 5.422934127  | 4.262557309  |
| H229 | -9.294587580  | 5.680524342  | 2.045899302  |
| H230 | -6.520908574  | 7.016814203  | 1.880731550  |
| H231 | -10.680605620 | 9.845417230  | -0.519903316 |
| H232 | -3.378200317  | 4.379209471  | 0.813222322  |
| H233 | -4.799982698  | 4.106535157  | -0.205794700 |
| H234 | -9.933161654  | 10.747142191 | 1.747792756  |
| H235 | -8.438673909  | 5.882982649  | 0.515897378  |
| H236 | -6.331027053  | 2.213615610  | 0.491074781  |
| H237 | -7.525137335  | -0.344818660 | 2.487599565  |
| H238 | -9.799449559  | 2.128381065  | -1.634704760 |
| H239 | -1.838951185  | 1.536944298  | -2.950666991 |
| H240 | -10.132621368 | 0.389097915  | -1.553148893 |
| H241 | 9.801085711   | 2.828559603  | 4.302994422  |
| H242 | 8.241419650   | 2.991369830  | 3.809906305  |
| H243 | 1.870102819   | 5.888696274  | -1.091510610 |
| H244 | -0.657862505  | 5.536307743  | 0.249532261  |
| H245 | 1.883234056   | 7.990046271  | 0.599321376  |
| H246 | -3.172233443  | 3.615916240  | -2.081697985 |
| H247 | -4.585206869  | 4.296364072  | -3.465947174 |
| H248 | -6.007015405  | 3.556318673  | -5.033721438 |
| H249 | -4.369421259  | 5.536020179  | -2.494499835 |
| H250 | -4.858003706  | 1.404839633  | -4.735401516 |
| H251 | -6.644530774  | 1.450871613  | -4.860367310 |
| H252 | 0.501335216   | 11.596803054 | -1.850644471 |
| H253 | -0.686804106  | 12.918119627 | -1.833394442 |
| H254 | -0.141955038  | 10.047680979 | -3.286308676 |
| H255 | -1.813450584  | 9.517626980  | -3.483779867 |
| H256 | -2.398150950  | 9.312036014  | -6.343566404 |
| H257 | -1.663879545  | 4.873213536  | -6.014102093 |
| H258 | -6.952276584  | 8.864385699  | -1.553993853 |
| H259 | -3.137220355  | 8.669530704  | 1.631639250  |
| H260 | -4.058020825  | 7.841067725  | -3.587098423 |
| H261 | 1.747717353   | 5.276451390  | -3.614868387 |
| H262 | 2.982279303   | 7.041486302  | -2.790428779 |
| H263 | -0.774940712  | 4.866227341  | -3.464301870 |
| H264 | -8.140431508  | -0.012163437 | -2.643194558 |
| H265 | 4.499567028   | 9.761813190  | -3.531685527 |
| H266 | -5.682497214  | -0.795552547 | -3.874015525 |
| H267 | 1.472915143   | 6.268462505  | -5.044263371 |
| H268 | -3.222006857  | 7.104493259  | -0.259664618 |
| H269 | 3.998620302   | 10.150016447 | -1.872564009 |
| H270 | -1.576512911  | 7.876498847  | -6.858598323 |
| H271 | -4.179163485  | 9.067132437  | -4.804790568 |
| H272 | -4.826776665  | -3.397113991 | -4.128896678 |
| H273 | -5.795754967  | -3.200605625 | -1.599056206 |
| H274 | -6.794303429  | 10.531896538 | 0.271569050  |
| H275 | -5.0114645366 | 1.514494466  | -2.260268488 |
| H276 | 0.291563066   | 7.977915809  | -3.679613081 |
| H277 | -0.674886552  | 6.325598535  | -6.135366515 |
| H278 | 0.120279786   | 4.161350464  | -4.802146673 |
| H279 | -2.881173280  | 5.929822721  | -4.117872944 |
| H280 | 0.694137598   | 8.946204155  | 3.070518753  |
| H281 | -0.199504880  | 9.752055600  | 0.055945693  |
| H282 | 0.190914174   | 12.606379679 | 0.358714068  |
| H283 | 2.245322342   | 9.421117412  | 2.342680416  |
| H284 | -2.390411493  | 10.737072785 | 1.410855126  |
| H285 | 5.782046309   | -3.135072680 | -8.241783234 |
| H286 | 5.561137912   | -4.612228910 | -7.285084091 |
| H287 | 8.294000827   | -5.408478008 | -3.782568433 |
| H288 | 6.364566342   | -5.211015238 | -9.449035412 |
| H289 | 4.784982157   | -5.636906373 | -9.433042102 |
| H290 | 5.612813624   | 4.563649320  | 0.086791024  |
| H291 | 5.816470781   | 7.263451923  | 1.448243152  |
| H292 | 5.533845828   | 7.841605234  | -2.761794445 |
| H293 | 4.191861146   | 5.510730183  | 0.633533253  |
| H294 | 7.044329076   | 7.789644821  | 0.501621921  |
| H295 | 6.247873657   | 2.696184179  | -5.617383424 |
| H296 | 6.373249032   | 6.434483662  | -1.313982229 |
| H297 | 4.211638104   | -7.109807880 | 5.660539379  |
| H298 | 6.302280806   | -8.103067958 | 3.647178174  |
| H299 | 4.536430303   | 1.251853010  | -6.049160292 |
| H300 | 4.424799485   | -0.170052609 | 4.118884275  |
| H301 | 1.854685348   | 1.499253036  | -8.402466093 |
| H302 | -0.608682025  | -2.240265215 | -4.363256917 |
| H303 | 1.428171483   | 2.024121729  | -6.773062807 |
| H304 | 3.365980392   | -4.616965255 | 5.065530491  |



|       |              |               |              |
|-------|--------------|---------------|--------------|
| H305  | 2.992715581  | -0.041356072  | -6.086666767 |
| H306  | 3.311239655  | -5.113552433  | 3.374931589  |
| H307  | 3.976369053  | -7.393781623  | 3.920118934  |
| H308  | 5.782922784  | -5.623105501  | 3.468642683  |
| H309  | 5.777648203  | -5.244211861  | 5.201580747  |
| H310  | -4.241168577 | -0.692209118  | -6.997112880 |
| H311  | 4.800681100  | -9.582256526  | 5.777760459  |
| H312  | 4.110296941  | -12.005779284 | 4.038361767  |
| H313  | 0.763767720  | -0.203477146  | -3.891848139 |
| H314  | 5.073958874  | -11.898566332 | 6.792671130  |
| H315  | 3.582037721  | -12.260222946 | 6.220316787  |
| H316  | 4.907768684  | -3.341552017  | 2.831797798  |
| H317  | 0.054201355  | 1.991124027   | -4.751018487 |
| H318  | -2.633001086 | -2.062598310  | -5.795238269 |
| H319  | 7.394812483  | -10.228406787 | -0.490907860 |
| H320  | 6.815639305  | -7.882760798  | -2.735385778 |
| H321  | 6.248657886  | -8.435335645  | 0.908071748  |
| H322  | 6.691094243  | -10.796140872 | -1.756665933 |
| H323  | 6.369972986  | 2.281281515   | -8.413077349 |
| H324  | 6.137793782  | -5.298490471  | 0.705391301  |
| H325  | 1.827324825  | -7.879176557  | 1.166633032  |
| H326  | 4.246949810  | -2.119542120  | -6.917127969 |
| H327  | 2.799507455  | -9.323429720  | -0.386039151 |
| H328  | 3.817481865  | -7.026659122  | -6.463463687 |
| H329  | 2.754833256  | -5.514264208  | -4.733402711 |
| H330  | 5.661654622  | -12.608876220 | 4.632646048  |
| H331  | 4.922135145  | -1.092702664  | 2.718461420  |
| H332  | 7.944365740  | -6.115752549  | 2.035819887  |
| H333  | 7.026154625  | -4.045979638  | 0.931505434  |
| H334  | 8.214495829  | -7.164211353  | 4.138799918  |
| H335  | 3.044044030  | -2.886680065  | 5.881868908  |
| H336  | 3.946909243  | -8.407656605  | -3.075384894 |
| H337  | 4.945577784  | -8.772051765  | -1.661870935 |
| H338  | 1.867295087  | -8.771301582  | -1.784973278 |
| H339  | 2.086043898  | -2.227309226  | -5.791317394 |
| H340  | -1.964592667 | 2.174816808   | -6.235276750 |
| H341  | -4.078031818 | 1.080350155   | -7.101871106 |
| H342  | 1.948988730  | -6.115786528  | 1.004798018  |
| H343  | 8.050509632  | -7.657238779  | 1.875029354  |
| H344  | 6.854954547  | -9.533114548  | 1.813718128  |
| H345  | 3.100956123  | -1.202867102  | 5.742476011  |
| H346  | 6.164904318  | -7.795073658  | -5.765717972 |
| H347  | 6.658429187  | -6.267089182  | -2.065324940 |
| H348  | 1.421679855  | -2.986505570  | -7.265023180 |
| H349  | 5.269348583  | 4.057646282   | -6.205396221 |
| H350  | 7.002867827  | -0.135686327  | 5.196604502  |
| H351  | 7.297545010  | 0.257370186   | 3.478118401  |
| H352  | 9.558345057  | -6.955774185  | -5.008494374 |
| H353  | 8.730223434  | -8.245380671  | -4.435456114 |
| H354  | 10.125601794 | -8.927222798  | -0.145851316 |
| H355  | 8.576711303  | -8.490905312  | -1.757320911 |
| H356  | 11.841544071 | -7.927341886  | -2.017994507 |
| H357  | 9.959888590  | -7.220929095  | 0.322274194  |
| H358  | 9.983818671  | -0.070481495  | 3.842277225  |
| H359  | -3.131042520 | 13.345198778  | 3.243670222  |
| H360  | 8.978266304  | -7.233839916  | 7.051224635  |
| H361  | 8.690999087  | -4.783490037  | 5.799308375  |
| H362  | -4.537827715 | 12.472654477  | 0.729207844  |
| H363  | -4.301751565 | 10.431088450  | 3.025509192  |
| H364  | -5.809332677 | 11.167768014  | 2.455619425  |
| H365  | 1.203170700  | -3.264370198  | -0.810792695 |
| H366  | -6.023449936 | 6.976291866   | -2.464303287 |
| H367  | 0.210407384  | -1.079667039  | 0.084592340  |
| H368  | -1.824335998 | -0.138917001  | -1.060456861 |
| Mo369 | 3.897152479  | -4.513951669  | -1.767129196 |
| N370  | -7.401228760 | -7.005472386  | -1.425707191 |
| N371  | -9.171192587 | -4.341133200  | 0.515052844  |
| N372  | -8.775048741 | -4.563066222  | 3.285287011  |
| N373  | -6.135715958 | -5.485258657  | 3.630616945  |
| N374  | -4.653053153 | -3.191756770  | 2.851516750  |
| N375  | -5.401501661 | -1.377406205  | 4.950004481  |
| N376  | -4.711409457 | -2.751031638  | 7.408199286  |
| N377  | -2.186973216 | -4.110193727  | 7.098907998  |
| N378  | -0.438627501 | -2.595803777  | 5.449691915  |
| N379  | -0.628006114 | 0.287223887   | 6.165076372  |
| N380  | -1.399103237 | 0.184460816   | 9.020784706  |
| N381  | 4.378489621  | -11.634394996 | 6.091385775  |
| N382  | 5.350446864  | -9.416465407  | 4.928461639  |
| N383  | 4.404673966  | -3.369775375  | 3.720789269  |
| N384  | 3.580584004  | -2.090303952  | 5.522774674  |
| N385  | 4.424185566  | -1.058976688  | 3.625103585  |
| N386  | 8.108525485  | -7.268997780  | 5.172132183  |

|      |               |               |               |
|------|---------------|---------------|---------------|
| N387 | -5.557501663  | -2.795873204  | -3.706125647  |
| N388 | -1.713297307  | -5.556231586  | -3.406686411  |
| N389 | -5.788346098  | -0.291073994  | -2.976982569  |
| N390 | -8.188655228  | 0.854557724   | -2.112262127  |
| N391 | -8.078183198  | 0.588482072   | 0.680438373   |
| N392 | -5.961081142  | 2.261795222   | 1.445059530   |
| N393 | -2.948934770  | 2.748668961   | -1.523202424  |
| N394 | -2.335202612  | 0.749064828   | -1.001005983  |
| N395 | -6.638687977  | 4.911908731   | 1.938142436   |
| N396 | -9.768939969  | 7.999489145   | 0.126289752   |
| N397 | -9.766678162  | 9.796622449   | 1.428157559   |
| N398 | 9.001613294   | 2.314127276   | 3.924551688   |
| N399 | 6.460727384   | 6.973683636   | 0.705331163   |
| N400 | 4.827445287   | 8.239550142   | -2.148317086  |
| N401 | 2.245841268   | 7.720738980   | -3.007962893  |
| N402 | -2.319086012  | 6.447748013   | -4.816941499  |
| N403 | -2.243875167  | 8.314758799   | -6.234915470  |
| N404 | -3.638269096  | 8.311157653   | -4.392910751  |
| N405 | 0.937887608   | 6.284592182   | -0.878860855  |
| N406 | 1.041827903   | 8.210561834   | 1.139820718   |
| N407 | -0.185037814  | 10.607627901  | 0.610623351   |
| N408 | -1.148428100  | 10.225781481  | -3.179479833  |
| N409 | -2.668171641  | 11.710428512  | 1.310487365   |
| N410 | 5.415834824   | -4.830328061  | -9.440349948  |
| N411 | 3.467979181   | -2.656673274  | -7.307335667  |
| N412 | 2.414360802   | 0.162614161   | -6.919553327  |
| N413 | 4.506349096   | 2.119985699   | -6.592720558  |
| N414 | -0.348146359  | -2.968921796  | -10.131938022 |
| N415 | -2.087800824  | -1.110285494  | -8.829059179  |
| N416 | 8.633776064   | -7.256486534  | -4.686947588  |
| N417 | 4.596243857   | -5.791976038  | -3.640449579  |
| N418 | 4.289610435   | -6.725414244  | -5.615137343  |
| N419 | 9.273539903   | -7.754251425  | -1.624403073  |
| N420 | 0.039752352   | 2.514208279   | -0.288217163  |
| N421 | 0.870818361   | 1.800028494   | -0.560383903  |
| O422 | -6.995378210  | -5.005653498  | 0.604269607   |
| O423 | -7.719288723  | -2.543699472  | 3.293914556   |
| O424 | -6.213555186  | -4.772774048  | 5.797553555   |
| O425 | -3.033611529  | -3.879769571  | 4.295243195   |
| O426 | -3.364161682  | -0.406493041  | 4.644486378   |
| O427 | -4.100907833  | -0.687240490  | 8.180106514   |
| O428 | -1.885995608  | -3.900799002  | 9.365082701   |
| O429 | 1.345008846   | -3.741064693  | 6.343509584   |
| O430 | 1.641239699   | 0.018727657   | 6.115391875   |
| O431 | 0.386570639   | 1.564965382   | 9.263410310   |
| O432 | 0.228385663   | -0.257374020  | 12.178832732  |
| O433 | 6.299612653   | -10.582547624 | 3.171366261   |
| O434 | 6.730727311   | -7.884104506  | 6.907429133   |
| O435 | 10.643231613  | -5.003965075  | 6.346464845   |
| O436 | -5.714778543  | -0.725070336  | -0.724894812  |
| O437 | -3.300617290  | -4.329575818  | -4.478491938  |
| O438 | -7.031440328  | 2.687615020   | -1.393894859  |
| O439 | -5.762802292  | 3.208469225   | -4.157476337  |
| O440 | -10.021430588 | 1.795344184   | 0.881533856   |
| O441 | -6.212827040  | 1.671130672   | 3.637778209   |
| O442 | -4.709131931  | 5.206062367   | 3.127628574   |
| O443 | -7.251615051  | 7.422450214   | 4.353415461   |
| O444 | 9.941223490   | -0.479403496  | 5.844642057   |
| O445 | 3.002568869   | 4.560605801   | 4.503375382   |
| O446 | 3.869405068   | 8.217139508   | -0.082953110  |
| O447 | 1.778157227   | 9.958842973   | -3.221618744  |
| O448 | -0.999006069  | 7.192190787   | -1.689506824  |
| O449 | -0.849690533  | 7.299770971   | 2.071382411   |
| O450 | 2.247569612   | 5.659904400   | 1.921792449   |
| O451 | 0.807190914   | 11.614449602  | 2.416045555   |
| O452 | -2.196160913  | 13.647117797  | 0.204293189   |
| O453 | -2.771683040  | 11.085780767  | -1.819443054  |
| O454 | -5.089366660  | 13.833576748  | 2.923781147   |
| O455 | -5.120116791  | 6.980684311   | -2.092255793  |
| O456 | 2.869709816   | -4.608916793  | -8.361512096  |
| O457 | 0.917693595   | -0.759047183  | -8.389554512  |
| O458 | 3.361897614   | 3.541344647   | -7.953087455  |
| O459 | 7.300834258   | 4.018074709   | -7.875619793  |
| O460 | -3.774889972  | -2.540561757  | -9.385053815  |
| O461 | -0.764060661  | -6.593435926  | -6.101605138  |
| O462 | 1.254850288   | -5.808883902  | -6.630976441  |
| O463 | -2.665637655  | 2.404875615   | -8.777356352  |
| O464 | 10.158656054  | -5.738535595  | -2.159574575  |
| O465 | 12.531576835  | -7.327016948  | -0.192849267  |
| O466 | 0.208785017   | -6.303758049  | -1.240117193  |
| O467 | -0.632329035  | -7.364704878  | 0.555276312   |
| O468 | 5.139945011   | -11.099178924 | -2.527895917  |

|                                                                  |      |               |                                 |              |
|------------------------------------------------------------------|------|---------------|---------------------------------|--------------|
|                                                                  | O469 | 2.920504040   | -11.004132815                   | -2.950985099 |
|                                                                  | O470 | 4.942276327   | -5.984576558                    | -0.518874972 |
|                                                                  | O471 | 4.645680264   | -7.714468942                    | 0.883131369  |
|                                                                  | O472 | 2.606225015   | -6.200366842                    | -1.650920934 |
|                                                                  | O473 | 8.452565710   | -6.894094819                    | 2.373793629  |
|                                                                  | O474 | 6.722741211   | -4.859929409                    | 1.375093808  |
|                                                                  | O475 | -3.886828990  | 4.853030730                     | -3.024453017 |
|                                                                  | O476 | 7.590064969   | -10.723076409                   | -1.317562077 |
|                                                                  | O477 | 7.096140252   | -8.930651100                    | 1.064973739  |
|                                                                  | S478 | 3.918311886   | 4.770746895                     | -1.664218803 |
|                                                                  | S479 | 2.548705894   | 1.817581119                     | -2.938612557 |
|                                                                  | S480 | 2.336714394   | -3.396906135                    | -3.184197776 |
|                                                                  | S481 | 3.497398889   | 1.618570841                     | 0.573551884  |
|                                                                  | S482 | 0.580871584   | -1.000179421                    | -1.226925788 |
|                                                                  | S483 | 4.728797204   | -0.829301029                    | -4.748806260 |
|                                                                  | S484 | 3.234761078   | -3.581639499                    | 0.365562303  |
|                                                                  | S485 | 6.028148423   | 1.514087436                     | -1.958904137 |
|                                                                  | S486 | 5.877191387   | -3.287394494                    | -2.176232925 |
|                                                                  | S487 | 6.097477376   | -1.189766022                    | 0.811583329  |
|                                                                  | end  |               |                                 |              |
| <b>rest-S2BH-6Hx</b><br><b>2N2 dissociated</b><br><b>35, S=1</b> |      |               | <b>bm522bh6x1a2n2xdtb.car_3</b> |              |
| <b>Fe(139) -2.366</b>                                            | C1   | -2.489434593  | -5.874671727                    | -7.185842125 |
| <b>Fe(140) -2.357</b>                                            | C2   | -1.764739869  | -6.006034018                    | -8.529398064 |
| <b>Fe(141) -2.529</b>                                            | C3   | -4.674914552  | -5.721823334                    | -6.077799572 |
| <b>Fe(142) 2.709</b>                                             | C4   | -4.496811437  | -6.741927515                    | -4.955895586 |
| <b>Fe(143) 2.872</b>                                             | C5   | -3.891991211  | -9.020409919                    | -4.319227571 |
| <b>Fe(144) 2.204</b>                                             | C6   | -2.729086995  | -8.712691165                    | -3.372608300 |
| <b>Fe(145) 1.455</b>                                             | C7   | -0.628286892  | -7.532272390                    | -3.004414968 |
|                                                                  | C8   | -1.071585439  | -6.472406769                    | -1.994975550 |
|                                                                  | C9   | -2.500033392  | -4.539898040                    | -1.553363976 |
|                                                                  | C10  | -3.331181771  | -5.148119680                    | -0.412046313 |
|                                                                  | C11  | -5.010547362  | -6.763187381                    | 0.263661880  |
|                                                                  | C12  | -4.246609520  | -7.670803846                    | 1.235620233  |
|                                                                  | C13  | -2.730964531  | -9.578855649                    | 1.473101500  |
|                                                                  | C14  | -1.406674886  | -9.192229646                    | 2.144234234  |
|                                                                  | C15  | 0.725138829   | -7.992229589                    | 1.902469323  |
|                                                                  | C16  | 0.909259259   | -6.612476884                    | 2.536845987  |
|                                                                  | C17  | 0.069159977   | -4.267082975                    | 2.640328154  |
|                                                                  | C18  | -0.811513993  | -4.154793080                    | 3.906036125  |
|                                                                  | C19  | -0.322621777  | -3.267046015                    | 1.531059925  |
|                                                                  | C20  | -0.454365253  | -1.850680301                    | 2.095889260  |
|                                                                  | C21  | 0.687822622   | -3.344345129                    | 0.380854712  |
|                                                                  | C22  | -3.095136522  | -4.347504540                    | 4.842950820  |
|                                                                  | C23  | -3.135070895  | -5.622807801                    | 5.709138563  |
|                                                                  | C24  | -4.496680990  | -3.953717190                    | 4.310125387  |
|                                                                  | C25  | -5.543276867  | -3.977248268                    | 5.430821742  |
|                                                                  | C26  | -4.454919495  | -2.572080032                    | 3.641578661  |
|                                                                  | C27  | -3.508236888  | -8.018922304                    | 5.855872213  |
|                                                                  | C28  | -2.424159056  | -8.223922117                    | 6.892905742  |
|                                                                  | C29  | 10.067512520  | -9.112214222                    | 0.994967856  |
|                                                                  | C30  | 9.855693757   | -7.737650172                    | 1.623086025  |
|                                                                  | C31  | 8.346801569   | -6.469809650                    | 3.153602126  |
|                                                                  | C32  | 8.653098823   | -6.659560676                    | 4.651437461  |
|                                                                  | C33  | 6.846642809   | -6.221723347                    | 2.912152083  |
|                                                                  | C34  | 6.318862687   | -4.975481406                    | 3.627255809  |
|                                                                  | C35  | 4.909322226   | -4.612198244                    | 3.158983112  |
|                                                                  | C36  | 3.326867519   | -3.115302655                    | 4.428729142  |
|                                                                  | C37  | 9.682500896   | -5.651790948                    | 6.634003630  |
|                                                                  | C38  | 8.889634684   | -4.683902424                    | 7.486024871  |
|                                                                  | C39  | -1.499029248  | -1.565829639                    | -5.857401540 |
|                                                                  | C40  | -2.816227577  | -1.080895121                    | -5.220223847 |
|                                                                  | C41  | -0.369284641  | -1.431115098                    | -4.813763640 |
|                                                                  | C42  | 0.953800269   | -2.144550660                    | -5.163479731 |
|                                                                  | C43  | 1.952794634   | -1.313891377                    | -5.968716229 |
|                                                                  | C44  | -4.258322250  | 0.913434577                     | -5.027633251 |
|                                                                  | C45  | -5.644964446  | 0.255062067                     | -5.040537587 |
|                                                                  | C46  | -4.263363435  | 2.325944218                     | -5.629148967 |
|                                                                  | C47  | -7.165545328  | -1.289513931                    | -6.182540744 |
|                                                                  | C48  | -7.408413974  | -2.315749126                    | -5.070854505 |
|                                                                  | C49  | -6.470059925  | -3.569072780                    | -3.180468886 |
|                                                                  | C50  | -6.329424954  | -2.903792373                    | -1.810836786 |
|                                                                  | C51  | -6.030125731  | -0.846221444                    | -0.517380432 |
|                                                                  | C52  | -7.400631912  | -0.625785493                    | 0.165333749  |
|                                                                  | C53  | -5.422393722  | 0.551029712                     | -0.694532813 |
|                                                                  | C54  | -4.037041568  | 0.620137591                     | -1.241652518 |
|                                                                  | C55  | -2.994860753  | -0.270687609                    | -1.322933019 |
|                                                                  | C56  | -2.266345594  | 1.687025944                     | -2.090003365 |
|                                                                  | C57  | -9.758190056  | -0.036492551                    | -0.266675356 |
|                                                                  | C58  | -10.342882722 | -1.062584468                    | 0.701076789  |
|                                                                  | C59  | -10.635218395 | 0.092823800                     | -1.535501421 |
|                                                                  | C60  | -11.886586086 | 0.909980566                     | -1.412753041 |

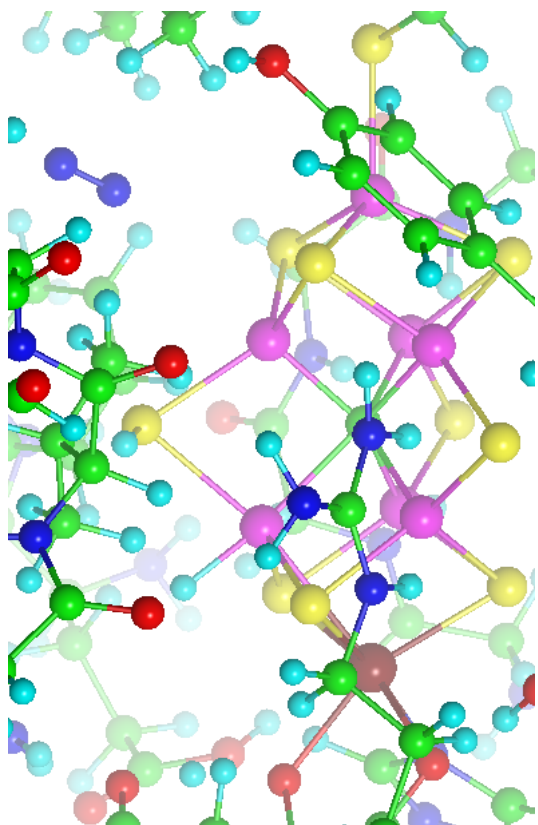

|       |               |              |              |
|-------|---------------|--------------|--------------|
| C61   | -12.805970206 | 1.015862458  | -0.387966318 |
| C62   | -13.397289177 | 2.302012105  | -2.093313464 |
| C63   | 4.124468115   | 0.034009383  | 9.081663221  |
| C64   | 5.601278413   | -0.304713431 | 9.171464845  |
| C65   | 3.628478606   | -0.482592917 | 7.705070422  |
| C66   | 2.158105622   | -0.229914384 | 7.478429709  |
| C67   | 1.188261388   | -1.169993672 | 7.872100469  |
| C68   | 1.713214083   | 0.957347040  | 6.868552289  |
| C69   | -0.174460406  | -0.944264976 | 7.656011592  |
| C70   | 0.355185263   | 1.203746301  | 6.658029651  |
| C71   | -0.588130377  | 0.246669055  | 7.048128210  |
| C72   | -0.154907542  | 6.271466099  | 6.095535314  |
| C73   | -1.496878145  | 6.944080827  | 5.753236133  |
| C74   | 0.026051535   | 5.011178890  | 5.253378535  |
| C75   | -2.601677236  | 8.966967028  | 4.863855552  |
| C76   | -3.344113088  | 8.560873294  | 3.586790969  |
| C77   | -3.297894886  | 7.026719788  | 1.623094504  |
| C78   | -3.913157006  | 5.637406708  | 1.939373512  |
| C79   | -2.165182992  | 6.938504754  | 0.568095473  |
| C80   | -2.428774270  | 6.250332188  | -0.775843748 |
| C81   | -3.250163531  | 7.038239133  | -1.805378361 |
| C82   | -5.688197875  | 7.594166973  | -1.731478704 |
| C83   | -3.763045927  | 3.522195453  | 3.168680330  |
| C84   | -4.966170415  | 3.588530491  | 4.114749526  |
| C85   | -2.710291943  | 2.602407152  | 3.832026151  |
| C86   | -5.759352404  | 4.558407912  | 6.207985770  |
| C87   | -6.963566092  | 5.483172295  | 6.159806405  |
| C88   | -8.161569228  | 7.155189469  | 4.861816665  |
| C89   | -9.638091618  | 6.758873578  | 4.607344354  |
| C90   | -7.730068510  | 8.264636186  | 3.900026792  |
| C91   | -7.788291902  | 7.869039312  | 2.430179536  |
| C92   | -11.185857009 | 5.019531798  | 3.824894116  |
| C93   | -12.191056413 | 4.925779967  | 4.964710180  |
| C94   | -11.044363917 | 3.638335636  | 3.124254061  |
| C95   | -10.166472668 | 3.697921499  | 1.893100620  |
| C96   | -10.719429183 | 4.005505478  | 0.640084417  |
| C97   | -8.776879891  | 3.498917600  | 1.970576480  |
| C98   | -9.916263149  | 4.133385472  | -0.495732044 |
| C99   | -7.951946475  | 3.655426654  | 0.850740125  |
| C100  | -8.535350317  | 3.977942586  | -0.372053842 |
| C101  | 8.421839354   | 5.033807494  | -3.880124088 |
| C102  | 7.122361483   | 4.558161922  | -4.506110497 |
| C103  | 4.689736726   | 4.243340275  | -4.131737165 |
| C104  | 3.665192724   | 5.383622725  | -4.146945246 |
| C105  | 2.391991524   | 6.942451788  | -2.737667676 |
| C106  | 2.645915765   | 7.890808988  | -1.567800617 |
| C107  | 3.661730713   | 8.330586573  | 0.604873111  |
| C108  | 4.462089523   | 9.594771231  | 0.360580221  |
| C109  | 3.473596875   | 4.150057774  | -8.556269337 |
| C110  | 1.956528377   | 4.372979638  | -8.591713378 |
| C111  | 3.784516480   | 2.825138027  | -7.822996693 |
| C112  | 5.229723755   | 2.369701797  | -8.085121099 |
| C113  | 5.591858466   | 1.220118917  | -7.170029831 |
| C114  | -0.024739337  | 5.246857996  | -7.452753746 |
| C115  | -0.292634463  | 6.631118709  | -6.896788847 |
| C116  | -0.846175167  | 4.112622602  | -6.795018493 |
| C117  | -0.265693826  | 3.675378806  | -5.473989874 |
| C118  | -0.543356727  | 4.382213513  | -4.290304709 |
| C119  | 0.656083091   | 2.614026479  | -5.426276952 |
| C120  | 0.124582331   | 4.061701990  | -3.103654005 |
| C121  | 1.324254874   | 2.294190336  | -4.238991478 |
| C122  | 1.071408144   | 3.031275865  | -3.078972411 |
| C123  | 11.007463541  | 1.130841115  | 0.025920667  |
| C124  | 11.548778093  | 0.558505825  | 1.344504768  |
| C125  | 10.078721964  | 0.117964625  | -0.661001923 |
| C126  | 9.354654953   | 0.602207650  | -1.874881452 |
| C127  | 9.902629418   | 1.071444012  | -3.051163244 |
| C128  | 7.720522955   | 0.822313635  | -3.313723302 |
| C129  | 12.598312783  | -1.264571375 | 2.545328232  |
| C130  | 13.577980032  | -0.354020286 | 3.253906400  |
| C131  | 4.778034542   | -4.164376854 | -2.851655830 |
| C132  | 5.728810811   | -4.133360030 | -1.662996520 |
| C133  | 6.877394730   | -3.087327703 | -1.785982247 |
| C134  | 7.938357592   | -3.577357813 | -2.807490790 |
| C135  | 9.241909027   | -2.775553843 | -2.835480401 |
| C136  | 10.338538907  | -3.384707405 | -3.735145035 |
| C137  | 7.565542172   | -2.939233744 | -0.418384282 |
| C138  | 3.634428533   | 1.779802781  | 0.951413057  |
| Fe139 | 5.125138491   | 2.232528969  | -0.324822986 |
| Fe140 | 1.737076087   | 1.871108476  | 0.847189095  |
| Fe141 | 3.435143164   | 2.065802559  | 2.919001874  |
| Fe142 | 3.523050821   | 3.776765086  | 0.946849877  |

|       |              |               |              |
|-------|--------------|---------------|--------------|
| Fe143 | 1.457435385  | 3.787865306   | 2.665833185  |
| Fe144 | 5.011443705  | 0.513549132   | 1.590361989  |
| Fe145 | 3.518234730  | 0.176628828   | -0.501388611 |
| H146  | 0.136473034  | -6.240664743  | -7.825373633 |
| H147  | -0.214983362 | -4.705018586  | -8.253179226 |
| H148  | -4.301974349 | -5.976162568  | -8.162067637 |
| H149  | -2.284526079 | -5.381459702  | -9.274413806 |
| H150  | -1.895982976 | -7.048619833  | -8.867123141 |
| H151  | -4.458773269 | -4.734980823  | -5.641611152 |
| H152  | -3.985581086 | -8.195784532  | -6.304159840 |
| H153  | -5.729267249 | -5.730597977  | -6.387975602 |
| H154  | -3.687041784 | -9.965777724  | -4.836710115 |
| H155  | -1.778751312 | -7.572696027  | -4.812016705 |
| H156  | -4.778019637 | -9.164793601  | -3.687386631 |
| H157  | -1.703923584 | -3.950587842  | -1.082557721 |
| H158  | -2.261245579 | -5.576410921  | -3.412708785 |
| H159  | 0.183672920  | -7.128681024  | -3.624155125 |
| H160  | -5.501395655 | -5.984583389  | 0.861056773  |
| H161  | -4.291764206 | -6.402234019  | -1.737191927 |
| H162  | -0.236255049 | -8.379924249  | -2.429021422 |
| H163  | -3.126845533 | -3.863356476  | -2.151321742 |
| H164  | -3.290536053 | -8.601299041  | -0.345056529 |
| H165  | -5.782043095 | -7.359871838  | -0.242021021 |
| H166  | 0.821461569  | -4.374234011  | 0.021630481  |
| H167  | 0.346016112  | -2.747066957  | -0.478653492 |
| H168  | 1.672063795  | -2.958427031  | 0.690329121  |
| H169  | -1.310430258 | -3.578869110  | 1.152907793  |
| H170  | -2.534130427 | -10.445087424 | 0.824615280  |
| H171  | -3.764101386 | -2.546047466  | 2.786633947  |
| H172  | -3.537742304 | -6.856636706  | 4.075041149  |
| H173  | -5.666792234 | -4.977959430  | 5.868658925  |
| H174  | 0.512775649  | -1.456267118  | 2.440082879  |
| H175  | -1.155907098 | -1.807309474  | 2.941056459  |
| H176  | 3.601949153  | -0.539507457  | 9.869718146  |
| H177  | -5.454651573 | -2.300425962  | 3.271292902  |
| H178  | -6.516767530 | -3.659233796  | 5.031382505  |
| H179  | -4.140052251 | -1.801373977  | 4.364406636  |
| H180  | -5.265419560 | -3.284783937  | 6.240898871  |
| H181  | -4.791824056 | -4.698923521  | 3.548795035  |
| H182  | -2.739332954 | -3.563126967  | 5.525896433  |
| H183  | -2.483139448 | -4.655926534  | 2.809384058  |
| H184  | -0.837499560 | -1.167786999  | 1.325874460  |
| H185  | -1.734679885 | 2.751623242   | 3.342494710  |
| H186  | -3.037836838 | 1.566452458   | 3.655505779  |
| H187  | -2.407245679 | 2.009795285   | 5.680929593  |
| H188  | -2.467043456 | -0.233017104  | 7.074909416  |
| H189  | 0.026776357  | 2.123679583   | 6.169989704  |
| H190  | 2.443784473  | 1.694985979   | 6.526064884  |
| H191  | 1.500511659  | -2.106502625  | 8.340395498  |
| H192  | -0.640024619 | -5.880725513  | 1.423290228  |
| H193  | 1.422810045  | -8.054752782  | 1.053426980  |
| H194  | 1.035079781  | -8.727127751  | 2.654018389  |
| H195  | -0.903096323 | -7.987841362  | 0.533308668  |
| H196  | -3.405096221 | -9.899701123  | 2.277039664  |
| H197  | -0.912328840 | -1.697776370  | 7.940191144  |
| H198  | 1.094479364  | -4.060091118  | 2.967169655  |
| H199  | -4.489512593 | -8.039971849  | 6.358418318  |
| H200  | -3.461864037 | -8.875349344  | 5.164676330  |
| H201  | -1.432695448 | -7.782512386  | 6.641119132  |
| H202  | 10.757246150 | -5.451479859  | 6.759640183  |
| H203  | 3.962707071  | -1.034732863  | -6.242467831 |
| H204  | 5.240672693  | -2.289429471  | -2.924427931 |
| H205  | 5.319402939  | 2.021947570   | -9.124392786 |
| H206  | 5.928116055  | 3.206713806   | -7.938305990 |
| H207  | 3.094845851  | 2.035708702   | -8.158428287 |
| H208  | 0.513016300  | 7.371841256   | -7.107982749 |
| H209  | 3.738787842  | 4.008537933   | -9.614698876 |
| H210  | -0.177535834 | -0.359985592  | -4.637380594 |
| H211  | 0.748674728  | -3.060355390  | -5.745235522 |
| H212  | 1.994473071  | 5.271711464   | -6.718863464 |
| H213  | -0.351292820 | 5.309201283   | -8.511572594 |
| H214  | 4.122055739  | 5.451123100   | -7.070891418 |
| H215  | 3.564291759  | -2.161669518  | -4.949435802 |
| H216  | 3.603191717  | 2.962469056   | -6.746018306 |
| H217  | 5.177291204  | 5.272419914   | -8.325720608 |
| H218  | -1.533469515 | -1.311484030  | -7.907094536 |
| H219  | -0.743573825 | -1.862845098  | -3.873332007 |
| H220  | 6.509612120  | 2.512374917   | -6.005930334 |
| H221  | 1.435831380  | -2.481062226  | -4.233812431 |
| H222  | -5.435070492 | -1.452693807  | 0.180372468  |
| H223  | -2.930167028 | -1.313048862  | -1.038134569 |
| H224  | -7.473120921 | -4.016140541  | -3.215175143 |

|      |               |              |              |
|------|---------------|--------------|--------------|
| H225 | -5.401022711  | -2.304310649 | -4.526361058 |
| H226 | -8.279946098  | -0.651650041 | -1.685836966 |
| H227 | -12.853150747 | 0.569436134  | 0.598498286  |
| H228 | -10.061488301 | -2.118125288 | 0.465615793  |
| H229 | -10.857274965 | -0.918669501 | -1.919968908 |
| H230 | -9.690732080  | 0.934060550  | 0.250789983  |
| H231 | -13.984956803 | 3.005159925  | -2.678104594 |
| H232 | -5.4288867579 | 1.035253423  | 0.295593210  |
| H233 | -6.082748257  | 1.146389181  | -1.344329859 |
| H234 | -14.575105583 | 2.217490425  | -0.320295964 |
| H235 | -10.019476991 | 0.584416999  | -2.305694209 |
| H236 | -6.125015301  | -1.013933397 | -2.662107567 |
| H237 | -5.749526529  | -4.399277766 | -3.224162161 |
| H238 | -8.023867606  | -0.603528573 | -6.158112095 |
| H239 | -1.611874532  | 2.456820133  | -2.493907275 |
| H240 | -7.185328034  | -1.810754944 | -7.149148291 |
| H241 | 4.099135449   | 1.780908908  | 10.150254765 |
| H242 | 3.013033919   | 1.745484578  | 8.930058220  |
| H243 | -2.252100343  | 5.056853534  | 3.072619439  |
| H244 | -4.130006225  | 3.037969680  | 2.253272559  |
| H245 | -4.046358665  | 5.127751627  | 5.109149600  |
| H246 | -4.139462081  | 2.694717211  | -1.850620298 |
| H247 | -5.238601715  | 3.726809881  | -3.252898124 |
| H248 | -5.409412050  | 3.912728583  | -5.485553541 |
| H249 | -6.111261839  | 3.827467778  | -1.925489328 |
| H250 | -3.242268738  | 2.734220899  | -5.551977692 |
| H251 | -4.549646440  | 2.285173166  | -6.690670559 |
| H252 | -6.735658685  | 8.635130502  | 4.184194767  |
| H253 | -8.441726691  | 9.094831221  | 4.034073957  |
| H254 | -5.878752006  | 8.616811187  | 2.143030971  |
| H255 | -6.694732147  | 7.921688030  | 0.739416974  |
| H256 | -6.229995324  | 9.573323693  | -1.644669697 |
| H257 | -2.888811452  | 6.823339684  | -2.821803712 |
| H258 | -10.365412613 | 4.354306315  | -1.466572614 |
| H259 | -8.307097228  | 3.202506160  | 2.913739867  |
| H260 | -7.128277732  | 6.155666799  | -1.398785209 |
| H261 | -1.322932069  | 6.411532237  | 1.045634654  |
| H262 | -1.810758899  | 7.300234489  | 3.125600193  |
| H263 | -2.868701589  | 5.251743798  | -0.629800659 |
| H264 | -5.191678046  | -0.694708213 | -6.791715784 |
| H265 | -2.310524738  | 10.020677135 | 4.758389551  |
| H266 | -2.593865880  | 0.494481759  | -6.417857919 |
| H267 | -1.814725527  | 7.967760207  | 0.384438656  |
| H268 | -6.869059750  | 3.560684413  | 0.946799682  |
| H269 | -3.332778458  | 8.899079315  | 5.682342164  |
| H270 | -4.579182068  | 9.295705949  | -2.097087555 |
| H271 | -7.729400385  | 7.728451652  | -1.801351643 |
| H272 | -0.199696013  | -0.637216482 | -7.159336101 |
| H273 | -1.644219469  | -2.644758957 | -6.050685115 |
| H274 | -11.797980172 | 4.142611557  | 0.546645761  |
| H275 | -4.022621423  | 0.994962646  | -3.959462751 |
| H276 | -4.123410617  | 7.650836860  | 1.269929132  |
| H277 | -3.107105738  | 8.112613736  | -1.639309704 |
| H278 | -1.439257545  | 6.086689371  | -1.224263497 |
| H279 | -4.920430241  | 5.716194554  | -1.874896127 |
| H280 | -6.128171744  | 3.532998339  | 6.361556758  |
| H281 | -6.528874778  | 5.915531173  | 4.209777913  |
| H282 | -8.194296220  | 7.603472791  | 5.867181078  |
| H283 | -5.165196322  | 4.844300100  | 7.086140145  |
| H284 | -9.069900911  | 4.877004679  | 4.110235173  |
| H285 | 8.222516812   | 5.855020748  | -3.175421883 |
| H286 | 8.789674172   | 4.178254451  | -3.275803011 |
| H287 | 10.421979345  | 2.016366911  | 0.314329393  |
| H288 | 10.287099808  | 5.568983558  | -4.503328134 |
| H289 | 9.419250933   | 4.757912068  | -5.632037987 |
| H290 | 0.983892072   | 4.550496836  | 5.530002773  |
| H291 | -0.919487126  | 5.352542459  | 7.751695980  |
| H292 | -0.505001615  | 8.592301126  | 5.023958423  |
| H293 | -0.792095414  | 4.307243350  | 5.463001473  |
| H294 | -0.139507370  | 6.751193462  | 8.094173828  |
| H295 | 4.205544179   | 7.731137772  | 1.352802570  |
| H296 | 0.671675451   | 6.969284167  | 5.887434743  |
| H297 | 6.284225876   | -7.114775950 | 3.232256000  |
| H298 | 8.922060682   | -5.621728083 | 2.761617308  |
| H299 | 3.983269744   | 6.608334507  | -0.608785716 |
| H300 | 2.235562729   | -1.649420392 | 5.345479652  |
| H301 | 2.396646620   | 7.543066074  | -3.655483490 |
| H302 | 2.050948193   | 1.479413049  | -4.225355453 |
| H303 | 1.362137584   | 6.568088072  | -2.611357455 |
| H304 | 4.198179029   | -5.409038935 | 3.406268501  |
| H305 | 3.646396804   | 5.290747930  | -2.109584257 |
| H306 | 4.894263813   | -4.507791395 | 2.061468519  |

|       |               |               |              |
|-------|---------------|---------------|--------------|
| H307  | 6.712727247   | -6.119625946  | 1.823386409  |
| H308  | 6.982461055   | -4.121256903  | 3.428887261  |
| H309  | 6.306422208   | -5.133701586  | 4.717595228  |
| H310  | -0.866833271  | 3.266368764   | -7.496440850 |
| H311  | 8.287092100   | -8.543137582  | 2.567806733  |
| H312  | 9.791362281   | -9.003591440  | -0.065300693 |
| H313  | 1.604624138   | 2.822724674   | -2.152926386 |
| H314  | 9.758726847   | -10.616343638 | 2.367508528  |
| H315  | 9.059452540   | -10.903476630 | 0.914590933  |
| H316  | 4.991057048   | -2.517550721  | 3.459238209  |
| H317  | -0.071491727  | 4.617663242   | -2.185264559 |
| H318  | 0.864491071   | 2.032907695   | -6.327872775 |
| H319  | 12.112472540  | -3.607315284  | -0.180094036 |
| H320  | 10.673124151  | -0.762556993  | -0.959660676 |
| H321  | 9.756289171   | -3.873111236  | 0.790873162  |
| H322  | 12.274598015  | -3.263205188  | -1.687971355 |
| H323  | 5.102000429   | 9.579246863   | -0.554248294 |
| H324  | 7.677405047   | -1.819050971  | 1.966752335  |
| H325  | 6.133849046   | -5.137171211  | -1.493864473 |
| H326  | 6.119906381   | 5.043383930   | -2.788060984 |
| H327  | 8.164281381   | -4.623839809  | -2.548545665 |
| H328  | 8.925911971   | 1.479830444   | -4.912505317 |
| H329  | 6.755289079   | 0.801920576   | -3.801718268 |
| H330  | 11.154238522  | -9.303713320  | 1.018106484  |
| H331  | 3.523919680   | -1.051745612  | 4.326004003  |
| H332  | 9.191198536   | -2.708289949  | 3.581189475  |
| H333  | 7.457351952   | -0.926115682  | 3.219751207  |
| H334  | 9.550806959   | -4.778689780  | 4.672861114  |
| H335  | 2.654801816   | -5.045121555  | 4.524190741  |
| H336  | 9.038108590   | -1.761011221  | -3.208363799 |
| H337  | 9.647647271   | -2.669829630  | -1.820851659 |
| H338  | 7.479005902   | -3.582420978  | -3.807163022 |
| H339  | 4.369125729   | 3.447717996   | -3.440725104 |
| H340  | -1.260226856  | 5.206454384   | -4.314146677 |
| H341  | -1.874259847  | 4.486605927   | -6.676609437 |
| H342  | 5.109918389   | -3.872375614  | -0.788336413 |
| H343  | 10.312515448  | -3.521080713  | 2.875129903  |
| H344  | 10.684498683  | -5.014168672  | 1.265807511  |
| H345  | 1.589072766   | -3.885675121  | 5.144148724  |
| H346  | 10.929404814  | 1.284808178   | -3.320943453 |
| H347  | 9.343971860   | -0.244457123  | 0.067648972  |
| H348  | 4.757146888   | 3.833011842   | -5.141307560 |
| H349  | 2.687829094   | 8.599388510   | 1.041455762  |
| H350  | 3.836103307   | -1.561998863  | 7.661747451  |
| H351  | 4.220746741   | 0.005945167   | 6.914721093  |
| H352  | 12.650897076  | 2.289289604   | -0.384131745 |
| H353  | 12.720897769  | 0.807214657   | -1.076233657 |
| H354  | 13.136322451  | -2.190396139  | 2.287064369  |
| H355  | 12.137185925  | -1.256872255  | 0.465567544  |
| H356  | 14.129930199  | 0.354692430   | 2.590451598  |
| H357  | 11.782973936  | -1.533755686  | 3.235335280  |
| H358  | 6.265569240   | 0.422638596   | 8.644294269  |
| H359  | -11.746023817 | 4.898960201   | 5.987027631  |
| H360  | 9.477717856   | -6.666714031  | 7.016953344  |
| H361  | 7.902196180   | -4.380267956  | 7.060700786  |
| H362  | -11.578831112 | 5.751349555   | 3.099245743  |
| H363  | -10.641630130 | 2.911991147   | 3.848133847  |
| H364  | -12.057528249 | 3.307996493   | 2.855307978  |
| H365  | 3.209928351   | -1.039289133  | -1.345739393 |
| H366  | -8.246327263  | 4.139766958   | -2.290335742 |
| H367  | 0.965474280   | -0.819543747  | -0.103891663 |
| H368  | -0.940636012  | 0.091226758   | -1.889659651 |
| Mo369 | 6.163593440   | -0.284009630  | -0.721615301 |
| N370  | -0.348383420  | -5.680595177  | -8.531767970 |
| N371  | -3.8511156267 | -5.964751075  | -7.250559586 |
| N372  | -4.130646624  | -7.993233558  | -5.317964890 |
| N373  | -1.707391883  | -7.974966882  | -3.875801121 |
| N374  | -1.931242459  | -5.529819674  | -2.452025342 |
| N375  | -4.166261221  | -6.155239283  | -0.752968606 |
| N376  | -3.382142503  | -8.553462306  | 0.673110520  |
| N377  | -0.613218140  | -8.327866608  | 1.452367030  |
| N378  | 0.046669209   | -5.644235683  | 2.139461607  |
| N379  | -2.129462402  | -4.440348753  | 3.744107657  |
| N380  | -3.313264439  | -6.807896326  | 5.072123947  |
| N381  | 9.249293038   | -10.171263276 | 1.600745401  |
| N382  | 8.778252312   | -7.654464509  | 2.427842699  |
| N383  | 4.451641512   | -3.341634847  | 3.731865405  |
| N384  | 2.576704836   | -4.113422857  | 4.941461393  |
| N385  | 2.930758327   | -1.844806623  | 4.628941630  |
| N386  | 9.302523675   | -5.621643546  | 5.235941953  |
| N387  | -1.219937566  | -0.800768185  | -7.078943452 |
| N388  | 3.252172899   | -1.539760838  | -5.702276133 |

|      |               |              |              |
|------|---------------|--------------|--------------|
| N389 | -3.229042586  | 0.128014866  | -5.687040108 |
| N390 | -5.919339455  | -0.545861668 | -6.095184329 |
| N391 | -6.327685848  | -2.699772765 | -4.333490988 |
| N392 | -6.126562243  | -1.550669325 | -1.789329587 |
| N393 | -3.551827822  | 1.822829005  | -1.736174510 |
| N394 | -1.919968766  | 0.415322595  | -1.852087676 |
| N395 | -8.438016710  | -0.476552446 | -0.696834577 |
| N396 | -12.267531537 | 1.716780918  | -2.473236311 |
| N397 | -13.756582331 | 1.907763824  | -0.838541397 |
| N398 | 3.970721227   | 1.485847289  | 9.179673047  |
| N399 | -0.086892134  | 5.904473157  | 7.520084174  |
| N400 | -1.422074652  | 8.185666387  | 5.189420861  |
| N401 | -2.720247880  | 7.652675695  | 2.808028626  |
| N402 | -4.682170806  | 6.718161433  | -1.761481649 |
| N403 | -5.490628903  | 8.915995994  | -1.869907964 |
| N404 | -6.946547652  | 7.157705526  | -1.492493527 |
| N405 | -3.232999369  | 4.839818560  | 2.811442235  |
| N406 | -4.918394224  | 4.596654865  | 5.028218698  |
| N407 | -7.223750921  | 6.054277166  | 4.943283243  |
| N408 | -6.745152706  | 8.315742197  | 1.677302483  |
| N409 | -9.881076898  | 5.457929692  | 4.307157943  |
| N410 | 9.354591268   | 5.487765062  | -4.915918627 |
| N411 | 6.014338283   | 4.717041494  | -3.751853598 |
| N412 | 3.317378353   | 5.837749048  | -2.921732672 |
| N413 | 3.504283871   | 7.513936010  | -0.587432306 |
| N414 | 4.185418961   | 5.346570340  | -8.090507944 |
| N415 | 1.406347548   | 5.005991681  | -7.515363803 |
| N416 | 12.086955934  | 1.586200564  | -0.870769159 |
| N417 | 7.976890557   | 0.467808485  | -2.054786188 |
| N418 | 8.858242776   | 1.200921865  | -3.937750431 |
| N419 | 12.107682505  | -0.681016534 | 1.310288726  |
| N420 | -2.477711519  | 1.425538464  | 1.154831360  |
| N421 | -1.526061448  | 1.961491073  | 0.939357081  |
| O422 | -1.898670024  | -5.737790526 | -6.100762669 |
| O423 | -4.686510286  | -6.415737686 | -3.769777564 |
| O424 | -2.736228807  | -9.143893235 | -2.207053631 |
| O425 | -0.661236620  | -6.481522729 | -0.822402122 |
| O426 | -3.233574567  | -4.720457642 | 0.750550112  |
| O427 | -4.456165487  | -7.616219484 | 2.459636044  |
| O428 | -1.091800013  | -9.702630687 | 3.227651265  |
| O429 | 1.844124218   | -6.434221636 | 3.337030775  |
| O430 | -0.324790452  | -3.823642825 | 5.003612865  |
| O431 | -3.020735515  | -5.558262556 | 6.944471667  |
| O432 | -2.592159659  | -8.893218461 | 7.902352455  |
| O433 | 10.637356848  | -6.804531114 | 1.345565216  |
| O434 | 8.315441281   | -7.697834366 | 5.246651639  |
| O435 | 9.274160956   | -4.259379314 | 8.564086086  |
| O436 | -3.431756006  | -1.728695270 | -4.350400123 |
| O437 | 1.584614443   | -0.492726279 | -6.840405415 |
| O438 | -6.442161962  | 0.439105555  | -4.103091187 |
| O439 | -5.193956347  | 3.159305069  | -4.907155983 |
| O440 | -8.553575794  | -2.751950817 | -4.896386016 |
| O441 | -6.400294517  | -3.583844137 | -0.781713056 |
| O442 | -7.502453479  | -0.494565653 | 1.387495074  |
| O443 | -11.081407252 | -0.788544781 | 1.630663936  |
| O444 | 6.054465313   | -1.281934972 | 9.749962093  |
| O445 | -1.919144644  | 0.521278716  | 6.790052008  |
| O446 | -2.588501912  | 6.398727532  | 5.991411452  |
| O447 | -4.445410759  | 9.081427700  | 3.322602441  |
| O448 | -4.985520255  | 5.302073731  | 1.409612962  |
| O449 | -5.862583277  | 2.736538235  | 4.068531958  |
| O450 | -2.600232352  | 2.859115377  | 5.232414209  |
| O451 | -7.653919423  | 5.684774966  | 7.165800249  |
| O452 | -10.541007669 | 7.597318515  | 4.736204114  |
| O453 | -8.745026265  | 7.242484414  | 1.953744138  |
| O454 | -13.396249106 | 4.861685420  | 4.782186419  |
| O455 | -7.691507954  | 4.175324997  | -1.486622677 |
| O456 | 7.118259392   | 4.023129469  | -5.640711239 |
| O457 | 3.217359363   | 5.858570386  | -5.210910609 |
| O458 | 2.019134705   | 8.962377025  | -1.526706356 |
| O459 | 4.446625351   | 10.551695774 | 1.117658501  |
| O460 | 1.266431418   | 3.969699776  | -9.542479146 |
| O461 | 5.250638764   | 0.059891018  | -7.374860395 |
| O462 | 6.279232819   | 1.533811643  | -6.052752624 |
| O463 | -1.311346883  | 6.954364594  | -6.302681089 |
| O464 | 11.528190971  | 1.215439520  | 2.403899621  |
| O465 | 13.817779642  | -0.421114062 | 4.451764287  |
| O466 | 4.553654703   | -2.973332421 | -3.418566269 |
| O467 | 4.208349645   | -5.187611727 | -3.227339142 |
| O468 | 11.534960872  | -3.384737907 | -3.278996532 |
| O469 | 9.989828568   | -3.807569185 | -4.873480611 |
| O470 | 7.546001013   | -1.745324604 | 0.116855979  |



|                                                                                                                                                                                                                                               |                                |              |              |              |
|-----------------------------------------------------------------------------------------------------------------------------------------------------------------------------------------------------------------------------------------------|--------------------------------|--------------|--------------|--------------|
|                                                                                                                                                                                                                                               | O471                           | 8.121613660  | -3.914583422 | 0.118217066  |
|                                                                                                                                                                                                                                               | O472                           | 6.302532131  | -1.837217663 | -2.170165996 |
|                                                                                                                                                                                                                                               | O473                           | 9.977167474  | -3.275270456 | 3.780547002  |
|                                                                                                                                                                                                                                               | O474                           | 7.650034039  | -1.845806350 | 2.957097640  |
|                                                                                                                                                                                                                                               | O475                           | -5.195343194 | 3.947099277  | -2.282850511 |
|                                                                                                                                                                                                                                               | O476                           | 12.772515531 | -3.250751550 | -0.816435441 |
|                                                                                                                                                                                                                                               | O477                           | 10.650570604 | -4.025986737 | 1.193613680  |
|                                                                                                                                                                                                                                               | S478                           | 0.019359928  | 5.388841882  | 3.443411106  |
|                                                                                                                                                                                                                                               | S479                           | 1.333004279  | 3.993233966  | 0.379557438  |
|                                                                                                                                                                                                                                               | S480                           | 4.723882612  | 1.008975443  | -2.153338561 |
|                                                                                                                                                                                                                                               | S481                           | 1.193428470  | 1.608708949  | 3.023030516  |
|                                                                                                                                                                                                                                               | S482                           | 1.183357706  | 0.345415386  | -0.760193587 |
|                                                                                                                                                                                                                                               | S483                           | 5.123755678  | 4.451090452  | -0.460690110 |
|                                                                                                                                                                                                                                               | S484                           | 4.524599642  | -1.440142695 | 0.617770441  |
|                                                                                                                                                                                                                                               | S485                           | 3.650764881  | 4.260620927  | 3.173390739  |
|                                                                                                                                                                                                                                               | S486                           | 6.889341073  | 1.400440537  | 0.780467102  |
|                                                                                                                                                                                                                                               | S487                           | 4.893395444  | 0.648051330  | 3.785327927  |
|                                                                                                                                                                                                                                               | end                            |              |              |              |
| <b>rest-S2BH-6Hx</b><br><b>2N2 TS</b><br><b>35, S=1</b><br><br><b>Fe( 139) -2.293</b><br><b>Fe( 140) -2.079</b><br><b>Fe( 141) -2.537</b><br><b>Fe( 142) 2.507</b><br><b>Fe( 143) 2.840</b><br><b>Fe( 144) 2.158</b><br><b>Fe( 145) 1.329</b> | <b>bm522bh6x1a2n2xdtf_orig</b> |              |              |              |
| 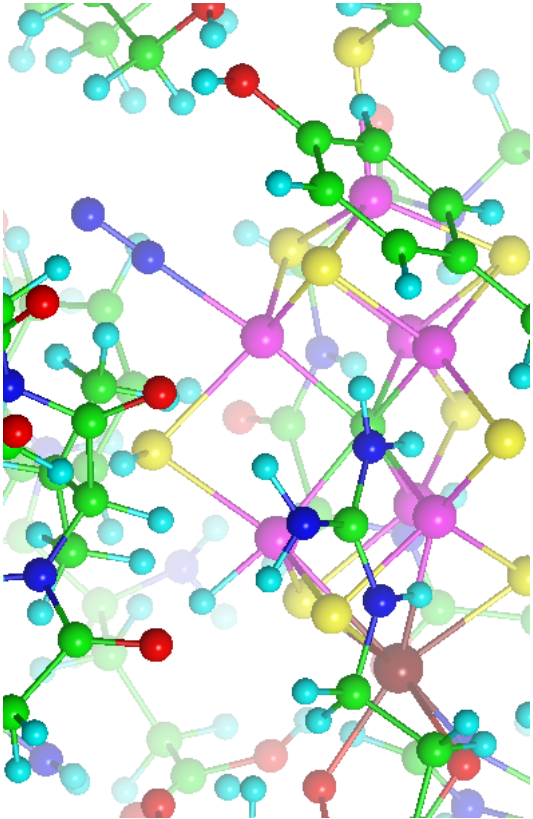                                                                                                                                                            | C1                             | -2.492218614 | -5.887777754 | -7.211658206 |
|                                                                                                                                                                                                                                               | C2                             | -1.782034533 | -6.003637058 | -8.564509520 |
|                                                                                                                                                                                                                                               | C3                             | -4.656191879 | -5.712241445 | -6.069733943 |
|                                                                                                                                                                                                                                               | C4                             | -4.479630526 | -6.729021430 | -4.946397086 |
|                                                                                                                                                                                                                                               | C5                             | -3.876621116 | -9.005217558 | -4.299888248 |
|                                                                                                                                                                                                                                               | C6                             | -2.725396474 | -8.686219179 | -3.343173253 |
|                                                                                                                                                                                                                                               | C7                             | -0.627691812 | -7.503144718 | -2.968742355 |
|                                                                                                                                                                                                                                               | C8                             | -1.085130839 | -6.446555413 | -1.961168769 |
|                                                                                                                                                                                                                                               | C9                             | -2.520869020 | -4.511780770 | -1.542006823 |
|                                                                                                                                                                                                                                               | C10                            | -3.356608731 | -5.111435419 | -0.400651573 |
|                                                                                                                                                                                                                                               | C11                            | -5.020583400 | -6.736083248 | 0.285017812  |
|                                                                                                                                                                                                                                               | C12                            | -4.261716380 | -7.650203688 | 1.256276044  |
|                                                                                                                                                                                                                                               | C13                            | -2.749958770 | -9.563063638 | 1.492529166  |
|                                                                                                                                                                                                                                               | C14                            | -1.413479026 | -9.203754716 | 2.153699197  |
|                                                                                                                                                                                                                                               | C15                            | 0.723812012  | -8.009108447 | 1.919600671  |
|                                                                                                                                                                                                                                               | C16                            | 0.913805185  | -6.624153623 | 2.540841982  |
|                                                                                                                                                                                                                                               | C17                            | 0.052830825  | -4.285180964 | 2.645197267  |
|                                                                                                                                                                                                                                               | C18                            | -0.825006465 | -4.178968427 | 3.912548773  |
|                                                                                                                                                                                                                                               | C19                            | -0.358544280 | -3.294045579 | 1.534113826  |
|                                                                                                                                                                                                                                               | C20                            | -0.539016793 | -1.867097823 | 2.074279301  |
|                                                                                                                                                                                                                                               | C21                            | 0.656807044  | -3.334876092 | 0.386239002  |
|                                                                                                                                                                                                                                               | C22                            | -3.105589909 | -4.354458517 | 4.853281855  |
|                                                                                                                                                                                                                                               | C23                            | -3.140196717 | -5.629227730 | 5.720979487  |
|                                                                                                                                                                                                                                               | C24                            | -4.508629632 | -3.962208997 | 4.326952299  |
|                                                                                                                                                                                                                                               | C25                            | -5.549066269 | -3.989202436 | 5.453793104  |
|                                                                                                                                                                                                                                               | C26                            | -4.475425070 | -2.581094238 | 3.657900441  |
|                                                                                                                                                                                                                                               | C27                            | -3.532550231 | -8.021777197 | 5.873469241  |
|                                                                                                                                                                                                                                               | C28                            | -2.458422701 | -8.211482846 | 6.924474724  |
|                                                                                                                                                                                                                                               | C29                            | 10.075296264 | -9.121163652 | 1.003145956  |
|                                                                                                                                                                                                                                               | C30                            | 9.865714714  | -7.743479146 | 1.627705374  |
|                                                                                                                                                                                                                                               | C31                            | 8.342739902  | -6.471740901 | 3.143109826  |
|                                                                                                                                                                                                                                               | C32                            | 6.636612364  | -6.659239829 | 4.643540591  |
|                                                                                                                                                                                                                                               | C33                            | 6.845047639  | -6.226822532 | 2.887260558  |
|                                                                                                                                                                                                                                               | C34                            | 6.310007772  | -4.982447738 | 3.598020072  |
|                                                                                                                                                                                                                                               | C35                            | 4.900989564  | -4.624360036 | 3.126575590  |
|                                                                                                                                                                                                                                               | C36                            | 3.337748374  | -3.121091397 | 4.411376734  |
|                                                                                                                                                                                                                                               | C37                            | 9.674036521  | -5.667187759 | 6.628489520  |
|                                                                                                                                                                                                                                               | C38                            | 8.918675245  | -4.678172306 | 7.488667248  |
|                                                                                                                                                                                                                                               | C39                            | -1.516796941 | -1.593751158 | -5.860473361 |
|                                                                                                                                                                                                                                               | C40                            | -2.824055470 | -1.102782044 | -5.211012641 |
|                                                                                                                                                                                                                                               | C41                            | -0.383694718 | -1.440049813 | -4.820917974 |
|                                                                                                                                                                                                                                               | C42                            | 0.944277600  | -2.147801853 | -5.162057007 |
| C43                                                                                                                                                                                                                                           | 1.939777512                    | -1.319395498 | -5.973688914 |              |
| C44                                                                                                                                                                                                                                           | -4.255364031                   | 0.896680496  | -4.999807761 |              |
| C45                                                                                                                                                                                                                                           | -5.643657440                   | 0.240384258  | -5.029786205 |              |
| C46                                                                                                                                                                                                                                           | -4.252335630                   | 2.312306094  | -5.592828892 |              |
| C47                                                                                                                                                                                                                                           | -7.147106078                   | -1.309091772 | -6.189716022 |              |
| C48                                                                                                                                                                                                                                           | -7.409896479                   | -2.305625330 | -5.055310636 |              |
| C49                                                                                                                                                                                                                                           | -6.481645728                   | -3.558623132 | -3.158676534 |              |
| C50                                                                                                                                                                                                                                           | -6.334423963                   | -2.888240667 | -1.793233119 |              |
| C51                                                                                                                                                                                                                                           | -6.034205571                   | -0.838258864 | -0.497037182 |              |
| C52                                                                                                                                                                                                                                           | -7.417768677                   | -0.631607947 | 0.163438803  |              |
| C53                                                                                                                                                                                                                                           | -5.430525723                   | 0.563657726  | -0.652807650 |              |
| C54                                                                                                                                                                                                                                           | -4.031893281                   | 0.642212356  | -1.167000237 |              |
| C55                                                                                                                                                                                                                                           | -2.993692638                   | -0.251266802 | -1.258503179 |              |
| C56                                                                                                                                                                                                                                           | -2.263505552                   | 1.708852208  | -2.019200361 |              |
| C57                                                                                                                                                                                                                                           | -9.772171696                   | -0.051624879 | -0.295945372 |              |
| C58                                                                                                                                                                                                                                           | -10.359569462                  | -1.098039801 | 0.648951343  |              |
| C59                                                                                                                                                                                                                                           | -10.637934788                  | 0.087279111  | -1.569547577 |              |
| C60                                                                                                                                                                                                                                           | -11.884882978                  | 0.912242711  | -1.442840055 |              |
| C61                                                                                                                                                                                                                                           | -12.806311739                  | 1.010849261  | -0.418439254 |              |
| C62                                                                                                                                                                                                                                           | -13.379959734                  | 2.330870647  | -2.103771157 |              |

|       |               |              |              |
|-------|---------------|--------------|--------------|
| C63   | 4.108842748   | 0.022977254  | 9.076282519  |
| C64   | 5.579242943   | -0.336619541 | 9.184342550  |
| C65   | 3.613369549   | -0.499181122 | 7.702525125  |
| C66   | 2.142761237   | -0.240295975 | 7.474458878  |
| C67   | 1.168151229   | -1.175432846 | 7.870626779  |
| C68   | 1.704098410   | 0.951215010  | 6.869779149  |
| C69   | -0.194355743  | -0.941527671 | 7.656871099  |
| C70   | 0.348081514   | 1.206021387  | 6.665685901  |
| C71   | -0.600276043  | 0.254386775  | 7.053087514  |
| C72   | -0.146739012  | 6.254671800  | 6.099655384  |
| C73   | -1.484522289  | 6.927036309  | 5.740869768  |
| C74   | 0.054457790   | 5.008908883  | 5.246249317  |
| C75   | -2.585871274  | 8.957120578  | 4.870643932  |
| C76   | -3.333231707  | 8.541738741  | 3.600635578  |
| C77   | -3.287251835  | 7.037377012  | 1.619160297  |
| C78   | -3.911183502  | 5.649506768  | 1.923364988  |
| C79   | -2.160522727  | 6.943491971  | 0.561551981  |
| C80   | -2.438826427  | 6.245086402  | -0.775355421 |
| C81   | -3.265519453  | 7.028423279  | -1.809038243 |
| C82   | -5.702519955  | 7.583085354  | -1.716700397 |
| C83   | -3.774695947  | 3.505143128  | 3.096024795  |
| C84   | -4.971122434  | 3.589218862  | 4.053711426  |
| C85   | -2.741992849  | 2.553775466  | 3.738535138  |
| C86   | -5.731114384  | 4.566480968  | 6.161807182  |
| C87   | -6.935810813  | 5.492792556  | 6.127695179  |
| C88   | -8.167665274  | 7.155622781  | 4.849070237  |
| C89   | -9.644206492  | 6.753398078  | 4.601171227  |
| C90   | -7.755007302  | 8.272818615  | 3.885907886  |
| C91   | -7.806365834  | 7.866220526  | 2.419636371  |
| C92   | -11.195347433 | 5.012699390  | 3.827464941  |
| C93   | -12.199889024 | 4.922502661  | 4.967267732  |
| C94   | -11.050631276 | 3.631033593  | 3.128132415  |
| C95   | -10.177305656 | 3.693357944  | 1.893539838  |
| C96   | -10.735646799 | 4.010926344  | 0.644886793  |
| C97   | -8.788013907  | 3.490967368  | 1.962956177  |
| C98   | -9.937150458  | 4.145822411  | -0.494094608 |
| C99   | -7.967938735  | 3.651169093  | 0.840350293  |
| C100  | -8.556111447  | 3.983960637  | -0.377103023 |
| C101  | 8.412955452   | 5.025871418  | -3.872135263 |
| C102  | 7.116951486   | 4.571121400  | -4.518217085 |
| C103  | 4.685329130   | 4.241326416  | -4.141651619 |
| C104  | 3.661749237   | 5.382156049  | -4.157201894 |
| C105  | 2.394023867   | 6.947189526  | -2.751605980 |
| C106  | 2.640310845   | 7.888257956  | -1.574657907 |
| C107  | 3.619457420   | 8.309164044  | 0.616568525  |
| C108  | 4.490666188   | 9.530256051  | 0.387601352  |
| C109  | 3.461542787   | 4.135927598  | -8.562103027 |
| C110  | 1.945976952   | 4.362228005  | -8.601424989 |
| C111  | 3.774898028   | 2.815743930  | -7.820632235 |
| C112  | 5.217976884   | 2.353245223  | -8.096345078 |
| C113  | 5.603113745   | 1.228208003  | -7.162674841 |
| C114  | -0.035041844  | 5.232654638  | -7.459227004 |
| C115  | -0.303961204  | 6.618051629  | -6.903230728 |
| C116  | -0.854316076  | 4.098598465  | -6.794889786 |
| C117  | -0.272076625  | 3.679461811  | -5.470347368 |
| C118  | -0.564787728  | 4.391652330  | -4.294248705 |
| C119  | 0.669617725   | 2.636448697  | -5.412036405 |
| C120  | 0.112878696   | 4.099869756  | -3.105783260 |
| C121  | 1.350400270   | 2.347852441  | -4.224781910 |
| C122  | 1.087497146   | 3.095551303  | -3.072860894 |
| C123  | 11.004674770  | 1.143651586  | 0.031155987  |
| C124  | 11.555254127  | 0.571298185  | 1.345838797  |
| C125  | 10.091764765  | 0.124884237  | -0.669384189 |
| C126  | 9.355769436   | 0.614984675  | -1.875319620 |
| C127  | 9.897920421   | 1.086823497  | -3.053067931 |
| C128  | 7.710725994   | 0.864438647  | -3.297342310 |
| C129  | 12.591133527  | -1.255475420 | 2.553659403  |
| C130  | 13.580531574  | -0.352327957 | 3.255703213  |
| C131  | 4.798877976   | -4.138827868 | -2.868146765 |
| C132  | 5.762069599   | -4.123916706 | -1.683593796 |
| C133  | 6.907584086   | -3.074554323 | -1.795927456 |
| C134  | 7.964085574   | -3.553237540 | -2.826942901 |
| C135  | 9.269565040   | -2.753760576 | -2.851675182 |
| C136  | 10.361479866  | -3.364786234 | -3.758982106 |
| C137  | 7.596989703   | -2.940451948 | -0.427950316 |
| C138  | 3.619477961   | 1.757318044  | 0.943541234  |
| Fe139 | 5.114600423   | 2.202250154  | -0.322234350 |
| Fe140 | 1.537903050   | 1.902075285  | 0.953545112  |
| Fe141 | 3.485708109   | 2.069080769  | 2.905175728  |
| Fe142 | 3.510146639   | 3.716573970  | 0.908946880  |
| Fe143 | 1.560046015   | 3.852018507  | 2.744705417  |
| Fe144 | 5.035285805   | 0.523773300  | 1.609322617  |

|  |       |              |               |              |
|--|-------|--------------|---------------|--------------|
|  | Fe145 | 3.530454692  | 0.123153929   | -0.465345761 |
|  | H146  | 0.129718333  | -6.235755723  | -7.887609343 |
|  | H147  | -0.236479662 | -4.696560968  | -8.286631552 |
|  | H148  | -4.319021043 | -5.971145304  | -8.160154101 |
|  | H149  | -2.313963575 | -5.373225939  | -9.295331866 |
|  | H150  | -1.911984862 | -7.043329049  | -8.910873403 |
|  | H151  | -4.415328496 | -4.728448789  | -5.640874516 |
|  | H152  | -3.966622184 | -8.187542202  | -6.289258837 |
|  | H153  | -5.714446112 | -5.706631431  | -6.363717332 |
|  | H154  | -3.656511290 | -9.950126823  | -4.813918810 |
|  | H155  | -1.764513513 | -7.558798063  | -4.783967584 |
|  | H156  | -4.769406919 | -9.155616652  | -3.678387209 |
|  | H157  | -1.729019676 | -3.914126654  | -1.073957224 |
|  | H158  | -2.267749524 | -5.562125316  | -3.391455367 |
|  | H159  | 0.181244458  | -7.089446296  | -3.585962703 |
|  | H160  | -5.501909085 | -5.954168389  | 0.885800054  |
|  | H161  | -4.289816261 | -6.396277903  | -1.715462102 |
|  | H162  | -0.228371873 | -8.346416402  | -2.391750384 |
|  | H163  | -3.145817258 | -3.843727766  | -2.150912806 |
|  | H164  | -3.291618545 | -8.570476450  | -0.322444167 |
|  | H165  | -5.800442521 | -7.326077519  | -0.215903055 |
|  | H166  | 0.804954289  | -4.352652877  | 0.000275265  |
|  | H167  | 0.313529463  | -2.716982481  | -0.459162788 |
|  | H168  | 1.633303062  | -2.941400987  | 0.709928462  |
|  | H169  | -1.335479350 | -3.634605585  | 1.154605594  |
|  | H170  | -2.572537735 | -10.433935519 | 0.845051068  |
|  | H171  | -3.779685849 | -2.549988553  | 2.807567968  |
|  | H172  | -3.563373464 | -6.861177711  | 4.090031691  |
|  | H173  | -5.660511103 | -4.988752583  | 5.898950020  |
|  | H174  | 0.425159561  | -1.347340158  | 2.183628597  |
|  | H175  | -1.039720750 | -1.842040466  | 3.053312895  |
|  | H176  | 3.570340531  | -0.534282991  | 9.866868145  |
|  | H177  | -5.475734501 | -2.322106413  | 3.281038401  |
|  | H178  | -6.528240575 | -3.683244359  | 5.057744346  |
|  | H179  | -4.173249798 | -1.806233750  | 4.381445536  |
|  | H180  | -5.274238785 | -3.288128464  | 6.258345733  |
|  | H181  | -4.806438450 | -4.708667894  | 3.568059858  |
|  | H182  | -2.744271981 | -3.570142558  | 5.533338820  |
|  | H183  | -2.505688244 | -4.649263585  | 2.813682543  |
|  | H184  | -1.166864660 | -1.281805610  | 1.385136108  |
|  | H185  | -1.779258799 | 2.658239367   | 3.216032552  |
|  | H186  | -3.118797885 | 1.529892707   | 3.589028592  |
|  | H187  | -2.391219887 | 1.988566371   | 5.592606011  |
|  | H188  | -2.488581401 | -0.198756187  | 7.092807990  |
|  | H189  | 0.022832126  | 2.128151143   | 6.183864641  |
|  | H190  | 2.438057644  | 1.682914883   | 6.525533656  |
|  | H191  | 1.477926647  | -2.114573026  | 8.338361893  |
|  | H192  | -0.636202801 | -5.900545104  | 1.426080885  |
|  | H193  | 1.428176808  | -8.091640453  | 1.076849740  |
|  | H194  | 1.020391843  | -8.738717276  | 2.682736955  |
|  | H195  | -0.910449397 | -7.982619057  | 0.555539474  |
|  | H196  | -3.424214167 | -9.870272978  | 2.301883353  |
|  | H197  | -0.934329571 | -1.690968878  | 7.947745974  |
|  | H198  | 1.074854844  | -4.062230183  | 2.968895650  |
|  | H199  | -4.520360126 | -8.043065872  | 6.363089261  |
|  | H200  | -3.469882828 | -8.881647309  | 5.187097674  |
|  | H201  | -1.457961901 | -7.797851185  | 6.660436912  |
|  | H202  | 10.755037396 | -5.500870688  | 6.750331675  |
|  | H203  | 3.947774665  | -1.029815794  | -6.248949833 |
|  | H204  | 5.267288921  | -2.264809454  | -2.922782768 |
|  | H205  | 5.289545124  | 1.981564382   | -9.128465297 |
|  | H206  | 5.915869931  | 3.195562474   | -7.981992527 |
|  | H207  | 3.079723455  | 2.024510333   | -8.141302217 |
|  | H208  | 0.505498870  | 7.357350621   | -7.107442606 |
|  | H209  | 3.728231027  | 3.987233231   | -9.619715323 |
|  | H210  | -0.198805712 | -0.364916079  | -4.660937076 |
|  | H211  | 0.747095891  | -3.070220224  | -5.735569938 |
|  | H212  | 1.983786895  | 5.254293554   | -6.727336475 |
|  | H213  | -0.366008752 | 5.295102241   | -8.515839419 |
|  | H214  | 4.112445810  | 5.445053007   | -7.085548970 |
|  | H215  | 3.558936397  | -2.147937044  | -4.947582358 |
|  | H216  | 3.607687125  | 2.964753874   | -6.742519048 |
|  | H217  | 5.167938174  | 5.255688354   | -8.337458560 |
|  | H218  | -1.560204445 | -1.345013523  | -7.910294873 |
|  | H219  | -0.752237355 | -1.859818004  | -3.873038083 |
|  | H220  | 6.532625773  | 2.549846299   | -6.039455073 |
|  | H221  | 1.427295815  | -2.473435803  | -4.229034355 |
|  | H222  | -5.448798836 | -1.444246538  | 0.209005990  |
|  | H223  | -2.936657075 | -1.299088344  | -0.993754936 |
|  | H224  | -7.489173608 | -3.996809129  | -3.189274833 |
|  | H225  | -5.401632408 | -2.315911467  | -4.516011390 |
|  | H226  | -8.268877123 | -0.635886904  | -1.702835720 |

|      |               |              |              |
|------|---------------|--------------|--------------|
| H227 | -12.860855817 | 0.548300225  | 0.560712970  |
| H228 | -10.068787540 | -2.146749076 | 0.394428478  |
| H229 | -10.863894455 | -0.921077044 | -1.960543651 |
| H230 | -9.717153099  | 0.911972584  | 0.235241302  |
| H231 | -13.958654892 | 3.049361902  | -2.678598261 |
| H232 | -5.466905560  | 1.043254739  | 0.339001512  |
| H233 | -6.076870225  | 1.157337805  | -1.318712220 |
| H234 | -14.564695526 | 2.226201069  | -0.337822595 |
| H235 | -10.017103931 | 0.580269187  | -2.334723294 |
| H236 | -6.101194491  | -1.001963637 | -2.644123435 |
| H237 | -5.768677952  | -4.396011850 | -3.199966930 |
| H238 | -8.010993174  | -0.630877358 | -6.210700163 |
| H239 | -1.604733283  | 2.480775707  | -2.409345612 |
| H240 | -7.134135362  | -1.861951160 | -7.138388578 |
| H241 | 4.108533848   | 1.782516371  | 10.127997727 |
| H242 | 3.017240160   | 1.746559955  | 8.911522530  |
| H243 | -2.241945723  | 5.027211268  | 3.025483654  |
| H244 | -4.150825152  | 3.033865807  | 2.176404241  |
| H245 | -4.022015159  | 5.111755874  | 5.049498797  |
| H246 | -4.133635114  | 2.715597439  | -1.772835195 |
| H247 | -5.242810077  | 3.693513806  | -3.231784138 |
| H248 | -5.396124591  | 3.901013684  | -5.459137099 |
| H249 | -6.138223968  | 3.822801143  | -1.922384237 |
| H250 | -3.233873771  | 2.722499286  | -5.494517569 |
| H251 | -4.517749241  | 2.273641989  | -6.659925417 |
| H252 | -6.766409365  | 8.658064348  | 4.169816978  |
| H253 | -8.481419800  | 9.089385217  | 4.019425329  |
| H254 | -5.864258733  | 8.534916751  | 2.158963078  |
| H255 | -6.668053363  | 7.820784246  | 0.758751022  |
| H256 | -6.247347559  | 9.554696892  | -1.566182930 |
| H257 | -2.903463298  | 6.805913636  | -2.824066255 |
| H258 | -10.389693241 | 4.378854166  | -1.461579343 |
| H259 | -8.314004760  | 3.189547784  | 2.901392923  |
| H260 | -7.146565824  | 6.135527320  | -1.429750837 |
| H261 | -1.316315742  | 6.415388102  | 1.034017078  |
| H262 | -1.787601280  | 7.305257200  | 3.112672012  |
| H263 | -2.885944331  | 5.250818879  | -0.616290053 |
| H264 | -5.173467560  | -0.699510792 | -6.780137567 |
| H265 | -2.293356636  | 10.009721146 | 4.754860119  |
| H266 | -2.599522957  | 0.479113474  | -6.400937336 |
| H267 | -1.806312836  | 7.969009486  | 0.367148286  |
| H268 | -6.885063919  | 3.553778564  | 0.930003752  |
| H269 | -3.314987866  | 8.897898065  | 5.691419072  |
| H270 | -4.591252535  | 9.296471945  | -2.011572355 |
| H271 | -7.7424446912 | 7.726053902  | -1.772983739 |
| H272 | -0.221952201  | -0.670006418 | -7.168835892 |
| H273 | -1.661263257  | -2.674546357 | -6.043955819 |
| H274 | -11.814911876 | 4.152342433  | 0.556007638  |
| H275 | -4.024779338  | 0.966573666  | -3.928145781 |
| H276 | -4.108221096  | 7.671381437  | 1.270692658  |
| H277 | -3.116215759  | 8.103287752  | -1.652350351 |
| H278 | -1.453446647  | 6.068775660  | -1.231311510 |
| H279 | -4.932770567  | 5.709355297  | -1.884093226 |
| H280 | -6.101958139  | 3.544729054  | 6.331168060  |
| H281 | -6.536458906  | 5.925522091  | 4.169764082  |
| H282 | -8.193265710  | 7.598183705  | 5.857196402  |
| H283 | -5.125242707  | 4.857415928  | 7.030834907  |
| H284 | -9.078291524  | 4.866417421  | 4.118564494  |
| H285 | 8.209025513   | 5.825216143  | -3.144564968 |
| H286 | 8.781187809   | 4.153454268  | -3.293327381 |
| H287 | 10.404721749  | 2.016755096  | 0.327867729  |
| H288 | 10.277693259  | 5.591566587  | -4.471485119 |
| H289 | 9.420545472   | 4.812530686  | -5.628923195 |
| H290 | 1.011326541   | 4.552603323  | 5.532433946  |
| H291 | -0.934453978  | 5.310538508  | 7.730679955  |
| H292 | -0.487630337  | 8.594524426  | 5.060600708  |
| H293 | -0.761054420  | 4.295085534  | 5.427618520  |
| H294 | -0.167731354  | 6.707178122  | 8.105631591  |
| H295 | 4.105055321   | 7.696347126  | 1.392032434  |
| H296 | 0.680654607   | 6.956678892  | 5.911519654  |
| H297 | 6.280009813   | -7.120266448 | 3.201148607  |
| H298 | 8.919204201   | -5.623301884 | 2.754098748  |
| H299 | 3.920093584   | 6.571804454  | -0.579615438 |
| H300 | 2.267500196   | -1.655754028 | 5.354755109  |
| H301 | 2.407474752   | 7.553928075  | -3.665339974 |
| H302 | 2.092250576   | 1.546657141  | -4.202933208 |
| H303 | 1.362531847   | 6.572573751  | -2.636724730 |
| H304 | 4.190077784   | -5.419751971 | 3.378474122  |
| H305 | 3.658497956   | 5.299526983  | -2.120596703 |
| H306 | 4.885098806   | -4.524381218 | 2.028719897  |
| H307 | 6.721442982   | -6.122839056 | 1.797419188  |
| H308 | 6.970202701   | -4.125634271 | 3.399574839  |

|       |               |               |              |
|-------|---------------|---------------|--------------|
| H309  | 6.294276728   | -5.137316766  | 4.688896244  |
| H310  | -0.868559817  | 3.248620854   | -7.491275052 |
| H311  | 8.288901440   | -8.545927249  | 2.559741369  |
| H312  | 9.802851136   | -9.012835549  | -0.058073839 |
| H313  | 1.633164917   | 2.912566474   | -2.147455720 |
| H314  | 9.750361255   | -10.619265214 | 2.379694812  |
| H315  | 9.057790633   | -10.907379761 | 0.923277732  |
| H316  | 5.000318229   | -2.533642533  | 3.431244658  |
| H317  | -0.095840276  | 4.663145338   | -2.194053649 |
| H318  | 0.884395818   | 2.046919316   | -6.306583938 |
| H319  | 12.102108197  | -3.613109179  | -0.188021127 |
| H320  | 10.701434140  | -0.739689610  | -0.985088405 |
| H321  | 9.762370093   | -3.876616751  | 0.792094306  |
| H322  | 12.275520466  | -3.278470398  | -1.697301584 |
| H323  | 5.135174238   | 9.489001603   | -0.522794732 |
| H324  | 7.684375776   | -1.825120555  | 1.960061813  |
| H325  | 6.167876822   | -5.131930660  | -1.536597993 |
| H326  | 6.119079875   | 5.013880040   | -2.787274551 |
| H327  | 8.192624800   | -4.601478330  | -2.577822672 |
| H328  | 8.910821021   | 1.514778949   | -4.904334311 |
| H329  | 6.740161343   | 0.860985670   | -3.776346751 |
| H330  | 11.161007414  | -9.317621962  | 1.030500998  |
| H331  | 3.567130591   | -1.057572496  | 4.348115669  |
| H332  | 9.187451577   | -2.708933879  | 3.587143096  |
| H333  | 7.447910430   | -0.930121162  | 3.208064834  |
| H334  | 9.549224510   | -4.784859105  | 4.671205495  |
| H335  | 2.629925850   | -5.041867967  | 4.467351047  |
| H336  | 9.069640271   | -1.736014219  | -3.219258669 |
| H337  | 9.679560258   | -2.655882175  | -1.837175869 |
| H338  | 7.504779860   | -3.550972273  | -3.827191733 |
| H339  | 4.366223933   | 3.447574244   | -3.447814842 |
| H340  | -1.298273597  | 5.200822794   | -4.324585350 |
| H341  | -1.884562096  | 4.468980539   | -6.683662183 |
| H342  | 5.146251498   | -3.879278221  | -0.801429992 |
| H343  | 10.310887036  | -3.517135790  | 2.879276150  |
| H344  | 10.695341390  | -5.011253749  | 1.276336052  |
| H345  | 1.601002989   | -3.882284796  | 5.141805701  |
| H346  | 10.925481349  | 1.289818649   | -3.328903000 |
| H347  | 9.366684415   | -0.265246242  | 0.054673946  |
| H348  | 4.752550688   | 3.830776051   | -5.151067564 |
| H349  | 2.645993782   | 8.636086490   | 1.011078111  |
| H350  | 3.817393468   | -1.579889306  | 7.664952826  |
| H351  | 4.208455148   | -0.015578795  | 6.910890830  |
| H352  | 12.624160914  | 2.338039539   | -0.362628795 |
| H353  | 12.729237223  | 0.863824635   | -1.065781005 |
| H354  | 13.122179521  | -2.185247048  | 2.296272826  |
| H355  | 12.124524627  | -1.253022965  | 0.472933325  |
| H356  | 14.155066982  | 0.329643872   | 2.584453364  |
| H357  | 11.775095367  | -1.519281622  | 3.245327462  |
| H358  | 6.262339093   | 0.380277079   | 8.668547945  |
| H359  | -11.755876295 | 4.915108577   | 5.990376187  |
| H360  | 9.441788955   | -6.676710265  | 7.009957584  |
| H361  | 7.929525756   | -4.353922371  | 7.082156463  |
| H362  | -11.586614533 | 5.743533035   | 3.100427968  |
| H363  | -10.639554522 | 2.908007953   | 3.850241883  |
| H364  | -12.062776478 | 3.293253173   | 2.864597882  |
| H365  | 3.166301715   | -1.140670818  | -1.202993628 |
| H366  | -8.273565316  | 4.157373420   | -2.299146905 |
| H367  | 0.872063893   | -0.707082243  | -0.290407063 |
| H368  | -0.950198246  | 0.100091710   | -1.879933989 |
| Mo369 | 6.183206271   | -0.281301320  | -0.697714846 |
| N370  | -0.369077113  | -5.668456226  | -8.577380094 |
| N371  | -3.855128819  | -5.973766973  | -7.254976095 |
| N372  | -4.112209834  | -7.981054273  | -5.303788415 |
| N373  | -1.700260784  | -7.951920103  | -3.843655869 |
| N374  | -1.941880497  | -5.506270660  | -2.429598202 |
| N375  | -4.176122593  | -6.133770981  | -0.733912052 |
| N376  | -3.389993035  | -8.527555534  | 0.695746154  |
| N377  | -0.617285119  | -8.335999566  | 1.468567081  |
| N378  | 0.046978513   | -5.660159322  | 2.144088506  |
| N379  | -2.145618241  | -4.451389419  | 3.750058416  |
| N380  | -3.330836513  | -6.813582469  | 5.085871445  |
| N381  | 9.248479730   | -10.174117542 | 1.608041312  |
| N382  | 8.782113225   | -7.657570554  | 2.423723454  |
| N383  | 4.449103611   | -3.351970867  | 3.696647998  |
| N384  | 2.579334818   | -4.119593647  | 4.912544939  |
| N385  | 2.966326105   | -1.849147860  | 4.641504368  |
| N386  | 9.289212411   | -5.625486523  | 5.232276666  |
| N387  | -1.242558113  | -0.832220229  | -7.084996391 |
| N388  | 3.240340898   | -1.534960926  | -5.705028130 |
| N389  | -3.226253982  | 0.114533015   | -5.662427670 |
| N390  | -5.906806298  | -0.557946223  | -6.088721918 |

|      |               |              |              |
|------|---------------|--------------|--------------|
| N391 | -6.332258325  | -2.699615526 | -4.318614312 |
| N392 | -6.106399314  | -1.539288221 | -1.772146525 |
| N393 | -3.543846776  | 1.847817639  | -1.651284993 |
| N394 | -1.920532635  | 0.434390322  | -1.795929767 |
| N395 | -8.441598155  | -0.474818468 | -0.713900445 |
| N396 | -12.254977464 | 1.741162423  | -2.490053490 |
| N397 | -13.746963680 | 1.918803257  | -0.857629304 |
| N398 | 3.973608509   | 1.479333772  | 9.160227298  |
| N399 | -0.102760386  | 5.870895332  | 7.518730428  |
| N400 | -1.405014577  | 8.177315893  | 5.197297278  |
| N401 | -2.703412453  | 7.650577038  | 2.807278583  |
| N402 | -4.695645310  | 6.709727381  | -1.762756275 |
| N403 | -5.509165537  | 8.908503887  | -1.826702672 |
| N404 | -6.960559271  | 7.139926658  | -1.491981851 |
| N405 | -3.219193962  | 4.817180876  | 2.753315329  |
| N406 | -4.901033216  | 4.591845684  | 4.972850014  |
| N407 | -7.218828383  | 6.061349223  | 4.915646263  |
| N408 | -6.728459094  | 8.249111122  | 1.680704824  |
| N409 | -9.888317048  | 5.451849833  | 4.306011553  |
| N410 | 9.347280465   | 5.515653720  | -4.888217592 |
| N411 | 6.009833545   | 4.711737379  | -3.758950523 |
| N412 | 3.320329293   | 5.842379476  | -2.932946937 |
| N413 | 3.461596453   | 7.487982687  | -0.571392807 |
| N414 | 4.175977259   | 5.332856850  | -8.103893227 |
| N415 | 1.395251104   | 4.991680842  | -7.523926007 |
| N416 | 12.077833746  | 1.627162038  | -0.857367329 |
| N417 | 7.975247056   | 0.493407672  | -2.044745719 |
| N418 | 8.847210743   | 1.236056321  | -3.929067346 |
| N419 | 12.101861693  | -0.673909265 | 1.315809896  |
| N420 | -1.700989253  | 1.774035617  | 0.928819956  |
| N421 | -0.587060556  | 1.787123294  | 0.958416641  |
| O422 | -1.887033424  | -5.757218612 | -6.133256405 |
| O423 | -4.669833805  | -6.399910751 | -3.761112052 |
| O424 | -2.743207393  | -9.108038358 | -2.174415265 |
| O425 | -0.683853956  | -6.452657920 | -0.785304542 |
| O426 | -3.274280348  | -4.665256026 | 0.756001864  |
| O427 | -4.482375447  | -7.603654546 | 2.478893549  |
| O428 | -1.093757313  | -9.736750142 | 3.224735673  |
| O429 | 1.853707280   | -6.443835142 | 3.335164964  |
| O430 | -0.333784267  | -3.859111908 | 5.011345161  |
| O431 | -3.013828395  | -5.564379797 | 6.955235818  |
| O432 | -2.641223165  | -8.843221491 | 7.955210928  |
| O433 | 10.651831434  | -6.812531234 | 1.355825149  |
| O434 | 8.287898992   | -7.694705308 | 5.237249878  |
| O435 | 9.335292169   | -4.260851820 | 8.557549385  |
| O436 | -3.436807938  | -1.749165705 | -4.337975636 |
| O437 | 1.567102825   | -0.508771432 | -6.853821116 |
| O438 | -6.447581998  | 0.420769580  | -4.097872306 |
| O439 | -5.199489107  | 3.137981779  | -4.886767328 |
| O440 | -8.561231534  | -2.720704174 | -4.869875149 |
| O441 | -6.425648305  | -3.563646158 | -0.762557900 |
| O442 | -7.541155075  | -0.518010795 | 1.385295693  |
| O443 | -11.108927345 | -0.847110272 | 1.576169668  |
| O444 | 6.008652895   | -1.322685680 | 9.766018348  |
| O445 | -1.928366445  | 0.541009557  | 6.794150788  |
| O446 | -2.578269203  | 6.371333269  | 5.942602743  |
| O447 | -4.446031559  | 9.042335879  | 3.348199617  |
| O448 | -5.001230292  | 5.338806319  | 1.416090809  |
| O449 | -5.882638152  | 2.752954560  | 4.011524629  |
| O450 | -2.574553416  | 2.832085842  | 5.129888275  |
| O451 | -7.608510669  | 5.697960664  | 7.145029284  |
| O452 | -10.547748329 | 7.591285196  | 4.728726106  |
| O453 | -8.778462916  | 7.270335843  | 1.934571919  |
| O454 | -13.404090391 | 4.840492935  | 4.783932149  |
| O455 | -7.718419477  | 4.187388326  | -1.495124131 |
| O456 | 7.114359603   | 4.068955368  | -5.668066442 |
| O457 | 3.205599797   | 5.849230738  | -5.221061261 |
| O458 | 2.037423403   | 8.974247449  | -1.545703608 |
| O459 | 4.517031299   | 10.482162940 | 1.149953864  |
| O460 | 1.258185806   | 3.965175772  | -9.556238567 |
| O461 | 5.263545146   | 0.061635304  | -7.333914282 |
| O462 | 6.312662822   | 1.568207085  | -6.067637121 |
| O463 | -1.326375276  | 6.942589665  | -6.315282437 |
| O464 | 11.551102594  | 1.234896727  | 2.401332445  |
| O465 | 13.810860519  | -0.406449898 | 4.456118695  |
| O466 | 4.574876473   | -2.943433872 | -3.425376586 |
| O467 | 4.223207367   | -5.158391291 | -3.247024229 |
| O468 | 11.555029192  | -3.399078750 | -3.295886397 |
| O469 | 10.009886509  | -3.759508494 | -4.906858407 |
| O470 | 7.582542018   | -1.751976745 | 0.116390459  |
| O471 | 8.151961448   | -3.925723369 | 0.093542568  |
| O472 | 6.325970940   | -1.821523270 | -2.163913950 |

|                                                                                                                                                                                                                                                             |                                  |              |               |              |
|-------------------------------------------------------------------------------------------------------------------------------------------------------------------------------------------------------------------------------------------------------------|----------------------------------|--------------|---------------|--------------|
|                                                                                                                                                                                                                                                             | O473                             | 9.974325269  | -3.275170329  | 3.785737001  |
|                                                                                                                                                                                                                                                             | O474                             | 7.652669238  | -1.848043473  | 2.950438685  |
|                                                                                                                                                                                                                                                             | O475                             | -5.216403882 | 3.936697405   | -2.265819862 |
|                                                                                                                                                                                                                                                             | O476                             | 12.765058318 | -3.260366498  | -0.822132707 |
|                                                                                                                                                                                                                                                             | O477                             | 10.655373897 | -4.023779458  | 1.202732745  |
|                                                                                                                                                                                                                                                             | S478                             | 0.074281361  | 5.414110117   | 3.443552382  |
|                                                                                                                                                                                                                                                             | S479                             | 1.348202279  | 4.082873327   | 0.462875685  |
|                                                                                                                                                                                                                                                             | S480                             | 4.709625150  | 0.953972513   | -2.125869315 |
|                                                                                                                                                                                                                                                             | S481                             | 1.298790998  | 1.697034923   | 3.251265890  |
|                                                                                                                                                                                                                                                             | S482                             | 1.310725886  | 0.422136905   | -0.910525402 |
|                                                                                                                                                                                                                                                             | S483                             | 5.076005648  | 4.412503975   | -0.491528402 |
|                                                                                                                                                                                                                                                             | S484                             | 4.575205144  | -1.444270547  | 0.672885632  |
|                                                                                                                                                                                                                                                             | S485                             | 3.772816869  | 4.262558087   | 3.115242583  |
|                                                                                                                                                                                                                                                             | S486                             | 6.896273675  | 1.429395590   | 0.785311410  |
|                                                                                                                                                                                                                                                             | S487                             | 4.911976953  | 0.655965657   | 3.806350873  |
|                                                                                                                                                                                                                                                             | end                              |              |               |              |
| <b>rest-S2BH-6Hx-6Hn</b><br><b>2N2 associated</b><br><b>35, S=3/2</b><br><br><b>Fe (139) -2.268</b><br><b>Fe (140) -0.962</b><br><b>Fe (141) -2.601</b><br><b>Fe (142) 2.757</b><br><b>Fe (143) 2.713</b><br><b>Fe (144) 2.295</b><br><b>Fe (145) 0.892</b> | <b>bm522bh6x6hn2n2xt3g.car_2</b> |              |               |              |
| 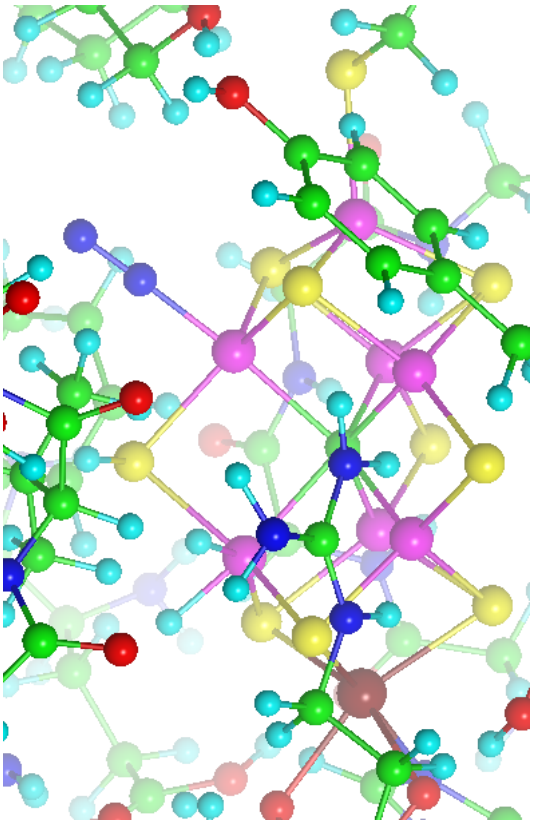                                                                                                                                                                          | C1                               | -2.136920861 | -8.611733535  | -3.743239227 |
|                                                                                                                                                                                                                                                             | C2                               | -1.468664978 | -9.248655085  | -4.966482608 |
|                                                                                                                                                                                                                                                             | C3                               | -4.259413327 | -8.116683734  | -2.618323724 |
|                                                                                                                                                                                                                                                             | C4                               | -3.931340146 | -8.526573736  | -1.186195130 |
|                                                                                                                                                                                                                                                             | C5                               | -3.075329651 | -10.247900844 | 0.319403246  |
|                                                                                                                                                                                                                                                             | C6                               | -1.934259194 | -9.452028316  | 0.959830718  |
|                                                                                                                                                                                                                                                             | C7                               | 0.043126226  | -8.063069754  | 0.627819902  |
|                                                                                                                                                                                                                                                             | C8                               | -0.488025703 | -6.713592900  | 1.112879400  |
|                                                                                                                                                                                                                                                             | C9                               | -2.099602407 | -4.906743710  | 0.762105976  |
|                                                                                                                                                                                                                                                             | C10                              | -2.831752776 | -5.010518796  | 2.107391635  |
|                                                                                                                                                                                                                                                             | C11                              | -4.281001150 | -6.309472257  | 3.554440682  |
|                                                                                                                                                                                                                                                             | C12                              | -3.395104906 | -6.634371921  | 4.765636506  |
|                                                                                                                                                                                                                                                             | C13                              | -1.689068885 | -8.121762960  | 5.699639474  |
|                                                                                                                                                                                                                                                             | C14                              | -0.373878968 | -7.402274909  | 6.026550681  |
|                                                                                                                                                                                                                                                             | C15                              | 1.620667385  | -6.283461660  | 5.124562888  |
|                                                                                                                                                                                                                                                             | C16                              | 1.687679596  | -4.756548600  | 5.067501901  |
|                                                                                                                                                                                                                                                             | C17                              | 0.582759925  | -2.689386605  | 4.220958995  |
|                                                                                                                                                                                                                                                             | C18                              | -0.247986892 | -2.102343815  | 5.385385602  |
|                                                                                                                                                                                                                                                             | C19                              | 0.023389927  | -2.322247932  | 2.827447069  |
|                                                                                                                                                                                                                                                             | C20                              | -0.287092412 | -0.822091341  | 2.702543136  |
|                                                                                                                                                                                                                                                             | C21                              | 0.988669212  | -2.783412625  | 1.731376346  |
|                                                                                                                                                                                                                                                             | C22                              | -2.456819033 | -2.022857031  | 6.493792891  |
|                                                                                                                                                                                                                                                             | C23                              | -2.327802993 | -2.787616268  | 7.828548095  |
|                                                                                                                                                                                                                                                             | C24                              | -3.912286481 | -2.010566537  | 5.961828503  |
|                                                                                                                                                                                                                                                             | C25                              | -4.903284536 | -1.614862284  | 7.062609122  |
|                                                                                                                                                                                                                                                             | C26                              | -4.047218997 | -1.070704299  | 4.756827387  |
|                                                                                                                                                                                                                                                             | C27                              | -2.466185196 | -4.900794437  | 9.029716825  |
|                                                                                                                                                                                                                                                             | C28                              | -1.345699117 | -4.528231184  | 9.977307068  |
|                                                                                                                                                                                                                                                             | C29                              | 10.999291772 | -6.950867045  | 4.027124631  |
|                                                                                                                                                                                                                                                             | C30                              | 10.661118290 | -5.460494476  | 4.009855212  |
|                                                                                                                                                                                                                                                             | C31                              | 9.076642263  | -3.779771984  | 4.954221725  |
|                                                                                                                                                                                                                                                             | C32                              | 9.447033214  | -3.268005671  | 6.360659493  |
|                                                                                                                                                                                                                                                             | C33                              | 7.554007021  | -3.787889095  | 4.739405991  |
|                                                                                                                                                                                                                                                             | C34                              | 6.920988259  | -2.402940980  | 4.881441096  |
|                                                                                                                                                                                                                                                             | C35                              | 5.462875298  | -2.396457366  | 4.421564749  |
|                                                                                                                                                                                                                                                             | C36                              | 3.807693441  | -0.597106502  | 5.044534380  |
|                                                                                                                                                                                                                                                             | C37                              | 10.453947101 | -1.436104152  | 7.637168720  |
|                                                                                                                                                                                                                                                             | C38                              | 9.632542185  | -0.229828946  | 8.033052130  |
|                                                                                                                                                                                                                                                             | C39                              | -1.558054949 | -4.099413647  | -4.458018762 |
|                                                                                                                                                                                                                                                             | C40                              | -2.888555316 | -3.484210838  | -3.981560337 |
| C41                                                                                                                                                                                                                                                         | -0.411469042                     | -3.414141524 | -3.678144035  |              |
| C42                                                                                                                                                                                                                                                         | 0.972700860                      | -4.087575100 | -3.778611410  |              |
| C43                                                                                                                                                                                                                                                         | 1.843431349                      | -3.638101446 | -4.951998509  |              |
| C44                                                                                                                                                                                                                                                         | -4.518957140                     | -1.715529014 | -4.547875112  |              |
| C45                                                                                                                                                                                                                                                         | -5.829046983                     | -2.425376456 | -4.178949446  |              |
| C46                                                                                                                                                                                                                                                         | -4.687671749                     | -0.706919323 | -5.694128726  |              |
| C47                                                                                                                                                                                                                                                         | -7.209102122                     | -4.433331351 | -4.429731893  |              |
| C48                                                                                                                                                                                                                                                         | -7.317129383                     | -4.849219407 | -2.957922206  |              |
| C49                                                                                                                                                                                                                                                         | -6.189511045                     | -5.075087000 | -0.789860219  |              |
| C50                                                                                                                                                                                                                                                         | -6.070234538                     | -3.863554742 | 0.134699713   |              |
| C51                                                                                                                                                                                                                                                         | -5.936175410                     | -1.433949282 | 0.383506692   |              |
| C52                                                                                                                                                                                                                                                         | -7.308108293                     | -1.065931978 | 1.000846753   |              |
| C53                                                                                                                                                                                                                                                         | -5.487912158                     | -0.202436629 | -0.415436903  |              |
| C54                                                                                                                                                                                                                                                         | -4.123980112                     | -0.252733704 | -1.020578870  |              |
| C55                                                                                                                                                                                                                                                         | -3.015421293                     | -1.035488015 | -0.814283366  |              |
| C56                                                                                                                                                                                                                                                         | -2.508639845                     | 0.450379443  | -2.396792855  |              |
| C57                                                                                                                                                                                                                                                         | -9.730197047                     | -0.936878811 | 0.530084343   |              |
| C58                                                                                                                                                                                                                                                         | -10.163993215                    | -1.511540225 | 1.877238238   |              |
| C59                                                                                                                                                                                                                                                         | -10.652142263                    | -1.436424436 | -0.605276401  |              |
| C60                                                                                                                                                                                                                                                         | -11.971613075                    | -0.738450969 | -0.748611465  |              |
| C61                                                                                                                                                                                                                                                         | -12.857719222                    | -0.262519504 | 0.197708373   |              |
| C62                                                                                                                                                                                                                                                         | -13.628150186                    | 0.123770372  | -1.844556848  |              |
| C63                                                                                                                                                                                                                                                         | 4.416638203                      | 4.312596031  | 7.840656629   |              |
| C64                                                                                                                                                                                                                                                         | 5.918614117                      | 4.146971479  | 7.988399253   |              |

|       |               |              |              |
|-------|---------------|--------------|--------------|
| C65   | 3.930694133   | 3.208866086  | 6.866529428  |
| C66   | 2.434736214   | 3.222931695  | 6.664810822  |
| C67   | 1.577761746   | 2.480715743  | 7.496834361  |
| C68   | 1.853797610   | 3.983764451  | 5.633582199  |
| C69   | 0.191942331   | 2.484621346  | 7.304768758  |
| C70   | 0.471622118   | 4.013148570  | 5.442248942  |
| C71   | -0.357343839  | 3.253551118  | 6.271057114  |
| C72   | -0.590599091  | 8.271246751  | 2.797562831  |
| C73   | -2.002468712  | 8.615704245  | 2.292448522  |
| C74   | -0.279141990  | 6.798838866  | 2.545895131  |
| C75   | -3.340316282  | 9.965449011  | 0.719450964  |
| C76   | -4.081266616  | 8.986421249  | -0.193960383 |
| C77   | -3.948881865  | 6.771000914  | -1.321187327 |
| C78   | -4.411700040  | 5.616912562  | -0.394349039 |
| C79   | -2.860178282  | 6.306763951  | -2.319548102 |
| C80   | -3.122965022  | 5.070625893  | -3.188377291 |
| C81   | -4.057498248  | 5.258210178  | -4.396851858 |
| C82   | -6.533141437  | 5.603899807  | -4.357042561 |
| C83   | -4.001304444  | 4.227034234  | 1.578978884  |
| C84   | -5.172472927  | 4.618671513  | 2.491372650  |
| C85   | -2.842094929  | 3.751601317  | 2.481190644  |
| C86   | -5.966551464  | 6.350535477  | 4.027063008  |
| C87   | -7.253581409  | 7.084284079  | 3.685765927  |
| C88   | -8.699895573  | 7.906359039  | 1.914427407  |
| C89   | -10.134181621 | 7.321784644  | 1.990255429  |
| C90   | -8.449029348  | 8.517602303  | 0.532261799  |
| C91   | -8.510056298  | 7.507314206  | -0.604293440 |
| C92   | -11.523225627 | 5.303937067  | 2.163151653  |
| C93   | -12.464772303 | 5.634547989  | 3.310725282  |
| C94   | -11.262903811 | 3.770051706  | 2.111677906  |
| C95   | -10.442917873 | 3.356516622  | 0.908658336  |
| C96   | -11.071842288 | 3.050868248  | -0.308976219 |
| C97   | -9.038554694  | 3.310379727  | 0.957189043  |
| C98   | -10.329106908 | 2.729197879  | -1.446248398 |
| C99   | -8.277260661  | 3.020470427  | -0.178716442 |
| C100  | -8.936074698  | 2.738642175  | -1.371910693 |
| C101  | 7.677423605   | 3.462866621  | -6.295872052 |
| C102  | 6.417357355   | 2.673039165  | -6.594203334 |
| C103  | 4.044170537   | 2.351076746  | -5.938783623 |
| C104  | 2.909719932   | 3.293803211  | -6.357727765 |
| C105  | 1.541094764   | 5.207759427  | -5.666209201 |
| C106  | 1.731628249   | 6.582938574  | -5.033077617 |
| C107  | 2.744411074   | 7.990721814  | -3.322640876 |
| C108  | 3.487224570   | 9.055639427  | -4.110362841 |
| C109  | 2.686057918   | 0.230316886  | -9.731473324 |
| C110  | 1.154410015   | 0.299761150  | -9.737413597 |
| C111  | 3.168462909   | -0.608091544 | -8.526363315 |
| C112  | 4.639837462   | -1.030310313 | -8.694349117 |
| C113  | 5.178041843   | -1.596359007 | -7.400322439 |
| C114  | -0.861144019  | 1.431767288  | -8.944215841 |
| C115  | -1.247431899  | 2.897431462  | -9.009557043 |
| C116  | -1.554366179  | 0.633908653  | -7.810465155 |
| C117  | -0.892127567  | 0.881278616  | -6.482867197 |
| C118  | -1.223548360  | 2.005648282  | -5.709778496 |
| C119  | 0.178332907   | 0.067255430  | -6.071865344 |
| C120  | -0.457486077  | 2.343752620  | -4.589854960 |
| C121  | 0.945621834   | 0.406359055  | -4.955202018 |
| C122  | 0.645103302   | 1.563748075  | -4.229777675 |
| C123  | 10.820917337  | 1.886544425  | -1.352680805 |
| C124  | 11.476696854  | 1.998162878  | 0.032494229  |
| C125  | 10.005045366  | 0.590533137  | -1.475121353 |
| C126  | 9.167316082   | 0.447237089  | -2.706679797 |
| C127  | 9.600060653   | 0.413447174  | -4.016078041 |
| C128  | 7.445419075   | -0.089816807 | -3.947427576 |
| C129  | 12.730618292  | 0.971023416  | 1.835723338  |
| C130  | 13.653641264  | 2.160196256  | 1.989203807  |
| C131  | 5.102048670   | -4.606492536 | -1.179865994 |
| C132  | 6.107600109   | -4.003952395 | -0.201805872 |
| C133  | 7.130179874   | -3.023638860 | -0.846819236 |
| C134  | 8.186749300   | -3.821043153 | -1.660080038 |
| C135  | 9.401901146   | -3.016035237 | -2.126823824 |
| C136  | 10.525321690  | -3.870633767 | -2.758575328 |
| C137  | 7.866658769   | -2.254589429 | 0.261077890  |
| C138  | 3.435044258   | 2.275884921  | -0.176648638 |
| Fe139 | 4.743440908   | 2.151837264  | -1.650738460 |
| Fe140 | 1.251261113   | 2.191553330  | -0.083558948 |
| Fe141 | 3.373638253   | 3.423859846  | 1.443057906  |
| Fe142 | 3.125943691   | 4.005965411  | -1.060520132 |
| Fe143 | 1.253547242   | 4.759921735  | 0.664425036  |
| Fe144 | 5.053550634   | 1.652316180  | 0.831070826  |
| Fe145 | 3.458093482   | 0.089064377  | -0.551282135 |
| H146  | 0.477322510   | -9.010218642 | -4.401126974 |



|      |               |               |               |
|------|---------------|---------------|---------------|
| H147 | -0.053548384  | -7.840036587  | -5.407329135  |
| H148 | -3.982953660  | -9.227295815  | -4.420157825  |
| H149 | -2.088774033  | -9.044290771  | -5.854045277  |
| H150 | -1.502684176  | -10.340893976 | -4.817206634  |
| H151 | -4.102573748  | -7.029014899  | -2.673750402  |
| H152 | -3.333692250  | -10.380300569 | -1.812035385  |
| H153 | -5.324447846  | -8.317102146  | -2.797790882  |
| H154 | -2.767841823  | -11.299047320 | 0.237789546   |
| H155 | -1.144978158  | -8.994433399  | -0.893528584  |
| H156 | -3.926073931  | -10.193604004 | 1.012150244   |
| H157 | -1.357608372  | -4.106652928  | 0.866067762   |
| H158 | -1.794902338  | -6.631071354  | -0.472139705  |
| H159 | 0.782056270   | -7.896195169  | -0.168111531  |
| H160 | -4.827165181  | -5.388426258  | 3.790682311   |
| H161 | -3.652418254  | -6.819280902  | 1.556311809   |
| H162 | 0.549507480   | -8.536065316  | 1.478106183   |
| H163 | -2.808617555  | -4.623366190  | -0.027820439  |
| H164 | -2.402617028  | -8.090365526  | 3.682379119   |
| H165 | -5.005103832  | -7.124657826  | 3.418087206   |
| H166 | 1.195390598   | -3.860742208  | 1.786609084   |
| H167 | 0.567478381   | -2.582876411  | 0.733370131   |
| H168 | 1.945162531   | -2.244085606  | 1.797800961   |
| H169 | -0.927088619  | -2.870538679  | 2.717439894   |
| H170 | -1.441662443  | -9.172685814  | 5.490369956   |
| H171 | -3.406836346  | -1.373180428  | 3.917522646   |
| H172 | -2.671195182  | -4.637503704  | 6.927459874   |
| H173 | -4.885939987  | -2.310865673  | 7.913857794   |
| H174 | 0.607826265   | -0.239019081  | 2.438931085   |
| H175 | -0.699623855  | -0.389254297  | 3.626255195   |
| H176 | 3.963157937   | 4.117373172   | 8.830750381   |
| H177 | -5.088005313  | -1.067199863  | 4.400908241   |
| H178 | -5.923021225  | -1.607069806  | 6.652147864   |
| H179 | -3.785130814  | -0.038518110  | 5.040979596   |
| H180 | -4.684091940  | -0.605621566  | 7.445901636   |
| H181 | -4.155842454  | -3.037307451  | 5.634642642   |
| H182 | -2.151384908  | -0.994967143  | 6.736126910   |
| H183 | -1.913102641  | -3.129327817  | 4.738957929   |
| H184 | -1.040875138  | -0.655840349  | 1.917143314   |
| H185 | -1.914516724  | 3.721792604   | 1.887172203   |
| H186 | -3.083254394  | 2.727188695   | 2.802974494   |
| H187 | -2.392415106  | 4.067357817   | 4.375702727   |
| H188 | -2.190279648  | 2.738708317   | 6.660449369   |
| H189 | 0.035108117   | 4.596526766   | 4.631376497   |
| H190 | 2.493793747   | 4.545676328   | 4.949364473   |
| H191 | 1.995905458   | 1.875207838   | 8.304808036   |
| H192 | 0.024825410   | -4.723638110  | 3.883716908   |
| H193 | 2.294394009   | -6.668233276  | 4.343347003   |
| H194 | 2.024745036   | -6.585054714  | 6.097813399   |
| H195 | -0.057792872  | -6.986235098  | 4.018633376   |
| H196 | -2.298546329  | -8.088206636  | 6.611479272   |
| H197 | -0.455509829  | 1.879482072   | 7.944025092   |
| H198 | 1.587637647   | -2.265421596  | 4.330708907   |
| H199 | -3.431370044  | -4.791156708  | 9.549635697   |
| H200 | -2.328191797  | -5.963012109  | 8.772452919   |
| H201 | -0.399461231  | -4.195802570  | 9.491401028   |
| H202 | 11.518365751  | -1.157156000  | 7.602572436   |
| H203 | 3.799934333   | -3.360734373  | -5.491907211  |
| H204 | 5.372478377   | -2.920484400  | -2.083031644  |
| H205 | 4.706444407   | -1.810768362  | -9.465449241  |
| H206 | 5.249112018   | -0.173454566  | -9.017021709  |
| H207 | 2.547827877   | -1.510925593  | -8.419808500  |
| H208 | -0.512575464  | 3.537872415   | -9.550594034  |
| H209 | 2.921454183   | -0.342077618  | -10.641676776 |
| H210 | -0.338995962  | -2.365729837  | -4.012569150  |
| H211 | 0.856634124   | -5.182530342  | -3.860686246  |
| H212 | 1.168725625   | 1.930827560   | -8.450944715  |
| H213 | -1.228508955  | 1.010938531   | -9.903312417  |
| H214 | 3.245855454   | 2.103961570   | -9.025111201  |
| H215 | 3.581254358   | -3.818369138  | -3.808123806  |
| H216 | 3.030307895   | -0.021922877  | -7.604617053  |
| H217 | 4.272260566   | 1.466156532   | -10.146248216 |
| H218 | -1.705550335  | -4.769897220  | -6.404239756  |
| H219 | -0.701816827  | -3.408160634  | -2.616377506  |
| H220 | 5.998726967   | 0.154013352   | -7.039688670  |
| H221 | 1.521261230   | -3.919390057  | -2.840051342  |
| H222 | -5.262380642  | -1.618675147  | 1.231883676   |
| H223 | -2.846509746  | -1.866789033  | -0.141789554  |
| H224 | -7.144897568  | -5.563143097  | -0.551589624  |
| H225 | -5.297237409  | -4.474809389  | -2.633270224  |
| H226 | -8.225267617  | -1.941722722  | -0.612546008  |
| H227 | -12.831309050 | -0.246117628  | 1.281850696   |
| H228 | -9.747248105  | -2.526598114  | 2.087187646   |

|      |               |              |              |
|------|---------------|--------------|--------------|
| H229 | -10.789760893 | -2.527330076 | -0.506054488 |
| H230 | -9.761326348  | 0.163064227  | 0.589307063  |
| H231 | -14.299578167 | 0.466220423  | -2.628483025 |
| H232 | -5.536756685  | 0.664073831  | 0.263911753  |
| H233 | -6.215622865  | -0.018811520 | -1.222847170 |
| H234 | -14.727980698 | 0.726428963  | -0.122194858 |
| H235 | -10.116332230 | -1.281031384 | -1.554956239 |
| H236 | -6.070554884  | -2.530496971 | -1.464858350 |
| H237 | -5.390686859  | -5.782877613 | -0.522399943 |
| H238 | -8.139128742  | -3.901070858 | -4.669210025 |
| H239 | -1.952082930  | 1.008568923  | -3.146983519 |
| H240 | -7.178496693  | -5.342523424 | -5.043895611 |
| H241 | 4.272083869   | 6.347492561  | 8.033565389  |
| H242 | 3.149633393   | 5.703596133  | 7.034475216  |
| H243 | -2.649522400  | 5.679671529  | 0.730624921  |
| H244 | -4.343565026  | 3.368744985  | 0.983205770  |
| H245 | -4.359135958  | 6.495390368  | 2.667885958  |
| H246 | -4.451053922  | 1.337497608  | -2.447719606 |
| H247 | -5.730466461  | 1.482180407  | -4.092423613 |
| H248 | -5.972312522  | 0.694224622  | -6.169585428 |
| H249 | -6.566565291  | 2.104134430  | -2.884819184 |
| H250 | -3.714367499  | -0.217260864 | -5.863106501 |
| H251 | -4.984536401  | -1.232223651 | -6.614812005 |
| H252 | -7.496739287  | 9.066098373  | 0.539465309  |
| H253 | -9.256976191  | 9.245142287  | 0.359297544  |
| H254 | -6.644544532  | 8.128736253  | -1.259827167 |
| H255 | -7.418543023  | 6.815226760  | -2.150796605 |
| H256 | -7.284766396  | 7.389472022  | -5.037587040 |
| H257 | -3.704350159  | 4.646423623  | -5.240726456 |
| H258 | -10.832668878 | 2.475057230  | -2.381734986 |
| H259 | -8.507702133  | 3.488529757  | 1.896154259  |
| H260 | -7.804871591  | 4.321079744  | -3.357364887 |
| H261 | -1.948131207  | 6.104380673  | -1.733410239 |
| H262 | -2.432728327  | 7.787325575  | -0.217293192 |
| H263 | -3.470634869  | 4.224444292  | -2.574710077 |
| H264 | -5.336322707  | -3.997013895 | -5.385862962 |
| H265 | -3.168689424  | 10.891699062 | 0.155364341  |
| H266 | -2.874622624  | -2.570537021 | -5.751967448 |
| H267 | -2.623499831  | 7.165913626  | -2.969577023 |
| H268 | -7.187591183  | 3.052998217  | -0.132991919 |
| H269 | -4.030723249  | 10.196383213 | 1.543828815  |
| H270 | -5.634404794  | 7.086765540  | -5.479347722 |
| H271 | -8.576981267  | 5.547187296  | -4.306417343 |
| H272 | -0.417383145  | -3.738823238 | -6.133404352 |
| H273 | -1.587900055  | -5.158361274 | -4.142289083 |
| H274 | -12.161777506 | 3.054219613  | -0.369296630 |
| H275 | -4.257118023  | -1.163088535 | -3.635699514 |
| H276 | -4.843608645  | 7.120906613  | -1.846244938 |
| H277 | -4.020831061  | 6.303457927  | -4.726443403 |
| H278 | -2.146544544  | 4.770918921  | -3.592863746 |
| H279 | -5.579764181  | 3.906552197  | -3.775445070 |
| H280 | -6.236115294  | 5.476025261  | 4.638387506  |
| H281 | -6.977445968  | 6.630008080  | 1.710759902  |
| H282 | -8.735008315  | 8.743332993  | 2.629328876  |
| H283 | -5.366694463  | 7.028550370  | 4.648984245  |
| H284 | -9.392365893  | 5.461909862  | 2.313806904  |
| H285 | 7.414620134   | 4.478912272  | -5.969392705 |
| H286 | 8.150288400   | 2.959110296  | -5.427419734 |
| H287 | 10.139961005  | 2.747760362  | -1.415953021 |
| H288 | 9.461807181   | 3.842174728  | -7.208924142 |
| H289 | 8.636968980   | 2.589163226  | -7.865292775 |
| H290 | 0.732552129   | 6.602042800  | 2.922130221  |
| H291 | -1.225024860  | 8.061721425  | 4.726262558  |
| H292 | -1.210910243  | 9.888647640  | 0.880627688  |
| H293 | -1.000419916  | 6.170983119  | 3.087541372  |
| H294 | -0.589565232  | 9.536886459  | 4.417834669  |
| H295 | 3.298862863   | 7.818101533  | -2.387614638 |
| H296 | 0.148797634   | 8.891492999  | 2.268234911  |
| H297 | 7.097696556   | -4.492930660 | 5.453551007  |
| H298 | 9.545855282   | -3.144327643 | 4.192038318  |
| H299 | 3.176387630   | 5.934256986  | -3.673372851 |
| H300 | 2.637890603   | 1.056945597  | 5.339886430  |
| H301 | 1.463118074   | 5.354576600  | -6.750164977 |
| H302 | 1.785537984   | -0.224429036 | -4.653140312 |
| H303 | 0.557914352   | 4.840144050  | -5.325103160 |
| H304 | 4.848704708   | -3.049253989 | 5.051835205  |
| H305 | 2.982794196   | 4.092459511  | -4.484328399 |
| H306 | 5.389396555   | -2.789953057 | 3.393825345  |
| H307 | 7.375412076   | -4.179714297 | 3.725457744  |
| H308 | 7.476989106   | -1.673336599 | 4.272916231  |
| H309 | 6.965169137   | -2.060836128 | 5.927473612  |
| H310 | -1.506152334  | -0.431624084 | -8.077040320 |

|       |               |              |              |
|-------|---------------|--------------|--------------|
| H311  | 9.223458253   | -5.897604587 | 5.330632647  |
| H312  | 10.678201796  | -7.346461496 | 3.051901425  |
| H313  | 1.256070098   | 1.865950549  | -3.379388641 |
| H314  | 10.889295256  | -7.712970494 | 5.938229655  |
| H315  | 10.169806585  | -8.662735595 | 4.813577356  |
| H316  | 5.379053537   | -0.375843351 | 3.799657984  |
| H317  | -0.697181605  | 3.226595296  | -3.994619097 |
| H318  | 0.425018021   | -0.832980144 | -6.638821660 |
| H319  | 12.380064957  | -2.367600630 | 0.428363204  |
| H320  | 10.694647613  | -0.270551217 | -1.444392427 |
| H321  | 10.134475893  | -2.364775115 | 1.603625451  |
| H322  | 12.473517049  | -2.723384361 | -1.085823954 |
| H323  | 4.085179590   | 8.680012542  | -4.975138440 |
| H324  | 7.934417343   | -0.187604256 | 1.909724531  |
| H325  | 6.618945557   | -4.815932131 | 0.328141031  |
| H326  | 5.437042166   | 3.733969895  | -5.146471001 |
| H327  | 8.530741477   | -4.641439928 | -1.010459824 |
| H328  | 8.492552938   | -0.090401605 | -5.779073122 |
| H329  | 6.465983941   | -0.391181335 | -4.291945379 |
| H330  | 12.100226884  | -7.022925566 | 4.052570497  |
| H331  | 3.841182070   | 1.246654336  | 4.087833820  |
| H332  | 9.541560049   | -0.149762901 | 3.664924844  |
| H333  | 7.640301560   | 1.139958408  | 2.664118112  |
| H334  | 10.167179652  | -1.508012721 | 5.504057801  |
| H335  | 3.293873620   | -2.350217844 | 5.968680795  |
| H336  | 9.083252401   | -2.281503642 | -2.882471432 |
| H337  | 9.832579518   | -2.449415700 | -1.289724812 |
| H338  | 7.691734714   | -4.287110478 | -2.526391798 |
| H339  | 3.834351427   | 1.906340837  | -4.952934110 |
| H340  | -2.058875869  | 2.638315791  | -6.019286169 |
| H341  | -2.611905888  | 0.940451851  | -7.803187005 |
| H342  | 5.504294922   | -3.453489006 | 0.540281560  |
| H343  | 10.719655322  | -1.091251958 | 3.288987282  |
| H344  | 11.197516428  | -3.092020028 | 2.456659100  |
| H345  | 2.173247690   | -1.096424949 | 6.151105816  |
| H346  | 10.583765115  | 0.570258671  | -4.443739022 |
| H347  | 9.358373211   | 0.489886077  | -0.595738532 |
| H348  | 4.116734708   | 1.556382531  | -6.683905316 |
| H349  | 1.753353727   | 8.385746935  | -3.052966019 |
| H350  | 4.248636252   | 2.240173478  | 7.279436434  |
| H351  | 4.441046183   | 3.348289511  | 5.900855816  |
| H352  | 12.285241755  | 2.924536082  | -2.343808974 |
| H353  | 12.531028590  | 1.306062974  | -2.348359939 |
| H354  | 13.344273038  | 0.065745086  | 1.968835699  |
| H355  | 12.177769086  | 0.019692732  | 0.009441690  |
| H356  | 14.126685841  | 2.513664629  | 1.041945607  |
| H357  | 11.976721024  | 0.980082554  | 2.638975887  |
| H358  | 6.515245009   | 4.624065224  | 7.174023533  |
| H359  | -11.982362837 | 6.081839397  | 4.211528606  |
| H360  | 10.324709287  | -2.190047624 | 8.434019565  |
| H361  | 8.598311684   | -0.203142269 | 7.611447618  |
| H362  | -12.018698805 | 5.613356105  | 1.227593267  |
| H363  | -10.759531487 | 3.463400430  | 3.043600229  |
| H364  | -12.244333548 | 3.273277541  | 2.093538985  |
| H365  | 3.285256575   | -1.392008338 | -0.776743234 |
| H366  | -8.735558121  | 2.082893370  | -3.197104754 |
| H367  | 0.707202773   | -0.544882482 | -0.289776351 |
| H368  | 2.724774512   | -0.566445943 | 0.562084068  |
| H369  | -1.071264485  | -0.902127240 | -1.741524414 |
| Mo370 | 6.159114441   | -0.093417368 | -0.989349021 |
| N371  | -0.098315662  | -8.846888825 | -5.230747822 |
| N372  | -3.485420537  | -8.806410501 | -3.639222895 |
| N373  | -3.453966831  | -9.777784068 | -1.001873218 |
| N374  | -1.004180105  | -8.935800927 | 0.116511797  |
| N375  | -1.451125635  | -6.141366224 | 0.350605066  |
| N376  | -3.538043987  | -6.144436272 | 2.314878619  |
| N377  | -2.462347871  | -7.604283430 | 4.581407207  |
| N378  | 0.306015289   | -6.879493148 | 4.968339350  |
| N379  | 0.703886824   | -4.138353164 | 4.369057676  |
| N380  | -1.536742380  | -2.521203502 | 5.469659052  |
| N381  | -2.416653034  | -4.141643433 | 7.785922568  |
| N382  | 10.313907691  | -7.691671434 | 5.093890793  |
| N383  | 9.610731041   | -5.121954358 | 4.783337125  |
| N384  | 4.910043479   | -1.037887887 | 4.420540460  |
| N385  | 3.162194263   | -1.333530960 | 5.972513021  |
| N386  | 3.332654018   | 0.623458741  | 4.736897196  |
| N387  | 10.022061531  | -2.039562892 | 6.390988983  |
| N388  | -1.411544124  | -3.927110095 | -5.906745045 |
| N389  | 3.170340535   | -3.626860814 | -4.727502500 |
| N390  | -3.435321239  | -2.624951409 | -4.883109797 |
| N391  | -6.052254189  | -3.622285339 | -4.767077536 |
| N392  | -6.174924552  | -4.801880063 | -2.215366039 |

|      |               |              |               |
|------|---------------|--------------|---------------|
| N393 | -5.984765502  | -2.628768041 | -0.448980161  |
| N394 | -3.773806145  | 0.656408869  | -2.008621505  |
| N395 | -2.040671598  | -0.581819249 | -1.683609462  |
| N396 | -8.376669010  | -1.387369399 | 0.226474838   |
| N397 | -12.464679909 | -0.490425829 | -2.020709533  |
| N398 | -13.902546523 | 0.283508594  | -0.518456427  |
| N399 | 4.136723195   | 5.646050185  | 7.300626573   |
| N400 | -0.458826843  | 8.537638423  | 4.239090244   |
| N401 | -2.073032824  | 9.497784282  | 1.251448227   |
| N402 | -3.389629298  | 7.890340471  | -0.570799575  |
| N403 | -5.444907386  | 4.873949359  | -4.117294938  |
| N404 | -6.483097087  | 6.767957522  | -5.027401150  |
| N405 | -7.728002584  | 5.205515013  | -3.864722522  |
| N406 | -3.610924020  | 5.301995487  | 0.663038141   |
| N407 | -5.179785443  | 5.923436906  | 2.886632661   |
| N408 | -7.639638355  | 7.032470085  | 2.373625832   |
| N409 | -7.489289020  | 7.594911769  | -1.499761907  |
| N410 | -10.251330725 | 6.005980469  | 2.297404790   |
| N411 | 8.527846519   | 3.535011362  | -7.488501543  |
| N412 | 5.325378917   | 3.042242919  | -5.892166231  |
| N413 | 2.568039121   | 4.209664049  | -5.425483493  |
| N414 | 2.631898725   | 6.725892363  | -4.027135864  |
| N415 | 3.286052610   | 1.559825093  | -9.894982968  |
| N416 | 0.582939718   | 1.293383157  | -8.998787042  |
| N417 | 11.805939492  | 2.024572466  | -2.441353385  |
| N418 | 7.806291174   | 0.139111847  | -2.685137700  |
| N419 | 8.501433762   | 0.075927988  | -4.776122521  |
| N420 | 12.132614210  | 0.908579279  | 0.513528311   |
| N421 | -1.630951557  | 1.773373487  | 0.262730717   |
| N422 | -0.524174822  | 1.953357331  | 0.123568569   |
| O423 | -1.506440156  | -7.987328751 | -2.872584296  |
| O424 | -4.103582239  | -7.728100961 | -0.246997956  |
| O425 | -1.871895219  | -9.317058838 | 2.193058048   |
| O426 | -0.053430551  | -6.176148681 | 2.145648498   |
| O427 | -2.774055016  | -4.092401612 | 2.942375843   |
| O428 | -3.567364101  | -6.056571351 | 5.853021396   |
| O429 | 0.039977211   | -7.375435178 | 7.193269293   |
| O430 | 2.637903516   | -4.169119576 | 5.613941483   |
| O431 | 0.255011655   | -1.295045942 | 6.189158150   |
| O432 | -2.172205297  | -2.178849705 | 8.900777380   |
| O433 | -1.431565771  | -4.661623566 | 11.189604404  |
| O434 | 11.326427696  | -4.680032105 | 3.298318006   |
| O435 | 9.223383026   | -3.960317186 | 7.368986499   |
| O436 | 10.042954451  | 0.651963197  | 8.771124552   |
| O437 | -3.397017145  | -3.730221533 | -2.869795836  |
| O438 | 1.352790312   | -3.325526969 | -6.061435288  |
| O439 | -6.608095636  | -1.913959160 | -3.355459584  |
| O440 | -5.691040159  | 0.264549591  | -5.342462611  |
| O441 | -8.411678557  | -5.219374354 | -2.514794031  |
| O442 | -6.049816787  | -4.023152741 | 1.360309516   |
| O443 | -7.396540962  | -0.445671345 | 2.064070584   |
| O444 | -10.922929306 | -0.956081312 | 2.652388799   |
| O445 | 6.454700495   | 3.533740990  | 8.899177652   |
| O446 | -1.714843105  | 3.287586660  | 6.010495789   |
| O447 | -3.026395733  | 8.136544546  | 2.809984589   |
| O448 | -5.248542459  | 9.238251497  | -0.550295194  |
| O449 | -5.475892851  | 5.023689494  | -0.635297810  |
| O450 | -5.998159297  | 3.779124733  | 2.870589029   |
| O451 | -2.678717750  | 4.611416942  | 3.613490911   |
| O452 | -7.901991653  | 7.672660535  | 4.559400203   |
| O453 | -11.114233897 | 8.061492504  | 1.821843058   |
| O454 | -9.442951285  | 6.699716074  | -0.722817990  |
| O455 | -13.664158917 | 5.410809305  | 3.267720127   |
| O456 | -8.158444320  | 2.494443374  | -2.524750519  |
| O457 | 6.429511435   | 1.722333242  | -7.413634859  |
| O458 | 2.375237405   | 3.222997900  | -7.483775319  |
| O459 | 1.020308928   | 7.522492010  | -5.425464027  |
| O460 | 3.464326955   | 10.238067915 | -3.812389128  |
| O461 | 0.472286607   | -0.530078000 | -10.361519933 |
| O462 | 4.957954753   | -2.742464067 | -7.022555544  |
| O463 | 5.887660902   | -0.754913694 | -6.622453495  |
| O464 | -2.284593014  | 3.364421886  | -8.561555691  |
| O465 | 11.456637109  | 3.065113567  | 0.677083794   |
| O466 | 13.938923293  | 2.658600853  | 3.069811964   |
| O467 | 4.740820413   | -3.802051539 | -2.186902845  |
| O468 | 4.614553489   | -5.725322820 | -1.029672082  |
| O469 | 11.728190960  | -3.595650205 | -2.413432337  |
| O470 | 10.184376546  | -4.757537124 | -3.590771005  |
| O471 | 7.775444546   | -0.950342988 | 0.223564641   |
| O472 | 8.532007550   | -2.867863158 | 1.115829901   |
| O473 | 6.397732648   | -2.101598642 | -1.658446287  |
| O474 | 10.390559264  | -0.506817850 | 4.026383401   |

|                                                                        |      |               |                                       |              |
|------------------------------------------------------------------------|------|---------------|---------------------------------------|--------------|
|                                                                        | O475 | 7.919547412   | 0.217400136                           | 2.814132909  |
|                                                                        | O476 | -5.682854131  | 2.127554429                           | -3.333297071 |
|                                                                        | O477 | 12.982582940  | -2.279657062                          | -0.343814780 |
|                                                                        | O478 | 11.049750310  | -2.241292052                          | 1.968920400  |
|                                                                        | S479 | -0.360501078  | 6.357806217                           | 0.749594833  |
|                                                                        | S480 | 0.906449106   | 3.954171105                           | -1.440524403 |
|                                                                        | S481 | 4.422792672   | 0.146996011                           | -2.600968901 |
|                                                                        | S482 | 1.238875761   | 3.016769437                           | 2.062320154  |
|                                                                        | S483 | 1.309893462   | 0.218932446                           | -1.250558989 |
|                                                                        | S484 | 4.535369108   | 4.038707735                           | -2.781909210 |
|                                                                        | S485 | 4.915694261   | -0.567019087                          | 0.963149933  |
|                                                                        | S486 | 3.402178191   | 5.498590357                           | 0.648924306  |
|                                                                        | S487 | 6.709586606   | 2.170077126                           | -0.559559136 |
|                                                                        | S488 | 5.002240653   | 2.708543532                           | 2.748978363  |
|                                                                        | end  |               |                                       |              |
| <b>rest-S2BH-6Hx-6Hn</b><br><b>2N2 dissociated</b><br><b>35, S=3/2</b> |      |               | <b>bm522bh6x6hn2n2xt3c_3_53067.67</b> |              |
| <b>Fe( 139) -2.388</b>                                                 | C1   | -2.128655055  | -8.588998414                          | -3.739763933 |
| <b>Fe( 140) -0.801</b>                                                 | C2   | -1.462289557  | -9.234437871                          | -4.959763317 |
| <b>Fe( 141) -2.265</b>                                                 | C3   | -4.257416484  | -8.111631521                          | -2.616565251 |
| <b>Fe( 142) 2.695</b>                                                  | C4   | -3.930945171  | -8.524644427                          | -1.184610740 |
| <b>Fe( 143) 2.769</b>                                                  | C5   | -3.074469987  | -10.248795225                         | 0.319463008  |
| <b>Fe( 144) 2.374</b>                                                  | C6   | -1.933495426  | -9.453777399                          | 0.959280121  |
| <b>Fe( 145) 0.393</b>                                                  | C7   | 0.043964469   | -8.065344847                          | 0.626396744  |
|                                                                        | C8   | -0.486512582  | -6.715929024                          | 1.112186684  |
|                                                                        | C9   | -2.097071553  | -4.908799478                          | 0.762111448  |
|                                                                        | C10  | -2.829609274  | -5.011963622                          | 2.108353050  |
|                                                                        | C11  | -4.279388202  | -6.311363919                          | 3.554454964  |
|                                                                        | C12  | -3.394201167  | -6.634533812                          | 4.764668305  |
|                                                                        | C13  | -1.686786499  | -8.120161253                          | 5.699700298  |
|                                                                        | C14  | -0.373876142  | -7.397689129                          | 6.025863895  |
|                                                                        | C15  | 1.617369952   | -6.274333592                          | 5.121920425  |
|                                                                        | C16  | 1.690112577   | -4.745819604                          | 5.063872723  |
|                                                                        | C17  | 0.595201074   | -2.669245111                          | 4.206924198  |
|                                                                        | C18  | -0.239544845  | -2.090327888                          | 5.374968492  |
|                                                                        | C19  | 0.029492833   | -2.311961811                          | 2.818046674  |
|                                                                        | C20  | -0.281117518  | -0.813434731                          | 2.694534558  |
|                                                                        | C21  | 0.989928918   | -2.781914166                          | 1.721015312  |
|                                                                        | C22  | -2.449475514  | -2.014065066                          | 6.484812925  |
|                                                                        | C23  | -2.317885208  | -2.779745840                          | 7.817511004  |
|                                                                        | C24  | -3.906904267  | -2.007974849                          | 5.958168412  |
|                                                                        | C25  | -4.898075086  | -1.614739634                          | 7.060177097  |
|                                                                        | C26  | -4.047530876  | -1.069208888                          | 4.752534714  |
|                                                                        | C27  | -2.448300763  | -4.891453244                          | 9.011038901  |
|                                                                        | C28  | -1.333830142  | -4.521897665                          | 9.966726141  |
|                                                                        | C29  | 10.995412604  | -6.947389690                          | 4.022830222  |
|                                                                        | C30  | 10.659018671  | -5.457495379                          | 4.007626665  |
|                                                                        | C31  | 9.076695640   | -3.777750533                          | 4.954920970  |
|                                                                        | C32  | 9.447733711   | -3.267859047                          | 6.361022233  |
|                                                                        | C33  | 7.553612812   | -3.786320496                          | 4.740585988  |
|                                                                        | C34  | 6.921615748   | -2.401609556                          | 4.883179956  |
|                                                                        | C35  | 5.463557160   | -2.395391630                          | 4.424020534  |
|                                                                        | C36  | 3.807470713   | -0.597626470                          | 5.048827072  |
|                                                                        | C37  | 10.453701158  | -1.435818033                          | 7.636714406  |
|                                                                        | C38  | 9.631876021   | -0.229237298                          | 8.032316855  |
|                                                                        | C39  | -1.548504465  | -4.082662102                          | -4.448643080 |
|                                                                        | C40  | -2.882428228  | -3.473236230                          | -3.976932132 |
|                                                                        | C41  | -0.400547965  | -3.401086624                          | -3.670584002 |
|                                                                        | C42  | 0.979756470   | -4.081788414                          | -3.775808770 |
|                                                                        | C43  | 1.848762443   | -3.635911936                          | -4.951545300 |
|                                                                        | C44  | -4.519069699  | -1.715738488                          | -4.549789103 |
|                                                                        | C45  | -5.828563253  | -2.424868005                          | -4.180178538 |
|                                                                        | C46  | -4.687371258  | -0.706686769                          | -5.694215302 |
|                                                                        | C47  | -7.209992313  | -4.432578713                          | -4.429394876 |
|                                                                        | C48  | -7.317355758  | -4.848790992                          | -2.957125220 |
|                                                                        | C49  | -6.188274434  | -5.076749374                          | -0.790194439 |
|                                                                        | C50  | -6.067134850  | -3.865949898                          | 0.134372694  |
|                                                                        | C51  | -5.923705689  | -1.437431452                          | 0.381943462  |
|                                                                        | C52  | -7.293352136  | -1.066453753                          | 0.999314093  |
|                                                                        | C53  | -5.478844128  | -0.207614617                          | -0.421334827 |
|                                                                        | C54  | -4.119731704  | -0.264034997                          | -1.036297591 |
|                                                                        | C55  | -3.009145881  | -1.047883518                          | -0.831620634 |
|                                                                        | C56  | -2.507105171  | 0.433037050                           | -2.417925561 |
|                                                                        | C57  | -9.708196656  | -0.924186247                          | 0.527440435  |
|                                                                        | C58  | -10.147754699 | -1.500690416                          | 1.873152323  |
|                                                                        | C59  | -10.638848336 | -1.426167783                          | -0.602391910 |
|                                                                        | C60  | -11.961689018 | -0.731291414                          | -0.745094575 |
|                                                                        | C61  | -12.851268661 | -0.258755333                          | 0.200148781  |
|                                                                        | C62  | -13.621789427 | 0.122193479                           | -1.842457358 |
|                                                                        | C63  | 4.417351202   | 4.313370067                           | 7.839461626  |
|                                                                        | C64  | 5.919173578   | 4.147342725                           | 7.988275495  |
|                                                                        | C65  | 3.932648124   | 3.209999348                           | 6.865232231  |

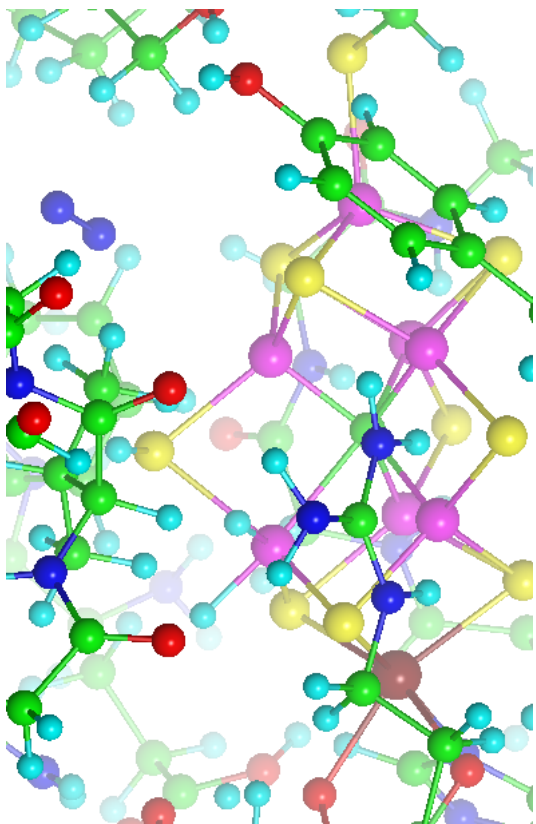

|       |               |              |              |
|-------|---------------|--------------|--------------|
| C66   | 2.436527457   | 3.223971944  | 6.662175372  |
| C67   | 1.579812707   | 2.480971879  | 7.493893767  |
| C68   | 1.855007169   | 3.982055962  | 5.629005607  |
| C69   | 0.193483610   | 2.484161085  | 7.302024285  |
| C70   | 0.473419334   | 4.009254398  | 5.436287066  |
| C71   | -0.355718117  | 3.250760747  | 6.266571058  |
| C72   | -0.594282294  | 8.272155489  | 2.797314201  |
| C73   | -2.004984745  | 8.617384331  | 2.292789126  |
| C74   | -0.280687928  | 6.796237294  | 2.548008853  |
| C75   | -3.340603760  | 9.965116723  | 0.718418115  |
| C76   | -4.079379513  | 8.985491274  | -0.196424193 |
| C77   | -3.943845582  | 6.769845938  | -1.321112599 |
| C78   | -4.406291913  | 5.616811512  | -0.392494332 |
| C79   | -2.854513076  | 6.306169401  | -2.318615302 |
| C80   | -3.116738172  | 5.069610266  | -3.188429389 |
| C81   | -4.051471124  | 5.256886557  | -4.395865326 |
| C82   | -6.525553102  | 5.602319381  | -4.354465432 |
| C83   | -3.995803296  | 4.239117064  | 1.591602881  |
| C84   | -5.172390464  | 4.626838488  | 2.496788898  |
| C85   | -2.836627504  | 3.779947631  | 2.505942395  |
| C86   | -5.966674371  | 6.352596376  | 4.035053667  |
| C87   | -7.250669796  | 7.085784805  | 3.689448736  |
| C88   | -8.688866422  | 7.905841947  | 1.912867800  |
| C89   | -10.122834239 | 7.319577503  | 1.991032086  |
| C90   | -8.442679824  | 8.516488937  | 0.531119518  |
| C91   | -8.506438293  | 7.507619763  | -0.606365338 |
| C92   | -11.507556922 | 5.299998355  | 2.160732837  |
| C93   | -12.453259059 | 5.634485587  | 3.306387752  |
| C94   | -11.254912716 | 3.766005826  | 2.110254096  |
| C95   | -10.436206079 | 3.353423548  | 0.907581021  |
| C96   | -11.064275538 | 3.049376800  | -0.311608675 |
| C97   | -9.032586099  | 3.306802831  | 0.956627209  |
| C98   | -10.320342982 | 2.728546657  | -1.449166395 |
| C99   | -8.270284598  | 3.018174600  | -0.178820380 |
| C100  | -8.926844585  | 2.737105966  | -1.373197546 |
| C101  | 7.685621335   | 3.467067080  | -6.315582450 |
| C102  | 6.422289242   | 2.676124095  | -6.604626933 |
| C103  | 4.051138233   | 2.354052249  | -5.940336163 |
| C104  | 2.915582146   | 3.296226557  | -6.356435637 |
| C105  | 1.543769207   | 5.208454789  | -5.665929770 |
| C106  | 1.730968708   | 6.586391884  | -5.037260465 |
| C107  | 2.742133379   | 8.006695310  | -3.335087491 |
| C108  | 3.487268796   | 9.068441813  | -4.121165218 |
| C109  | 2.687026177   | 0.230319284  | -9.734065847 |
| C110  | 1.155275473   | 0.299600733  | -9.737473594 |
| C111  | 3.169081252   | -0.607874772 | -8.528029058 |
| C112  | 4.641540608   | -1.029744639 | -8.695547713 |
| C113  | 5.179308007   | -1.596419342 | -7.401346182 |
| C114  | -0.858867845  | 1.432650418  | -8.942273578 |
| C115  | -1.244238362  | 2.898322633  | -9.008790504 |
| C116  | -1.550597401  | 0.636192564  | -7.808119116 |
| C117  | -0.888762644  | 0.880571619  | -6.479681638 |
| C118  | -1.219718040  | 2.004171640  | -5.704495621 |
| C119  | 0.180035398   | 0.065052029  | -6.069157058 |
| C120  | -0.457482736  | 2.335398172  | -4.579712773 |
| C121  | 0.942856911   | 0.397820528  | -4.946974267 |
| C122  | 0.639930339   | 1.549162147  | -4.214811761 |
| C123  | 10.822319521  | 1.883746202  | -1.350223002 |
| C124  | 11.480160756  | 1.994216653  | 0.035418680  |
| C125  | 10.002489326  | 0.590239343  | -1.474689181 |
| C126  | 9.165824012   | 0.448953789  | -2.708072710 |
| C127  | 9.600773153   | 0.413278728  | -4.017206925 |
| C128  | 7.445667958   | -0.087235115 | -3.951979729 |
| C129  | 12.745549387  | 0.968754995  | 1.834059961  |
| C130  | 13.662677328  | 2.161003531  | 1.987452953  |
| C131  | 5.102637212   | -4.610053827 | -1.179546409 |
| C132  | 6.107313908   | -4.006876597 | -0.202169649 |
| C133  | 7.131992588   | -3.028620807 | -0.846973575 |
| C134  | 8.188919297   | -3.824951961 | -1.658721223 |
| C135  | 9.402728104   | -3.015980826 | -2.124825551 |
| C136  | 10.525449544  | -3.869438933 | -2.756883589 |
| C137  | 7.867722575   | -2.257045041 | 0.261712312  |
| C138  | 3.454740968   | 2.296699601  | -0.185207948 |
| Fe139 | 4.770825162   | 2.131346651  | -1.679045388 |
| Fe140 | 1.622321991   | 2.211941207  | -0.175333230 |
| Fe141 | 3.258471537   | 3.335632965  | 1.451404381  |
| Fe142 | 3.205040378   | 4.080950945  | -1.053062656 |
| Fe143 | 1.190930733   | 4.674480545  | 0.637540430  |
| Fe144 | 5.039251593   | 1.580973160  | 0.831607026  |
| Fe145 | 3.460238504   | 0.064329985  | -0.566721925 |
| H146  | 0.485088541   | -9.006238671 | -4.400017575 |
| H147  | -0.041875906  | -7.835734754 | -5.408238485 |

|      |               |               |               |
|------|---------------|---------------|---------------|
| H148 | -3.968843401  | -9.220539222  | -4.416009737  |
| H149 | -2.084045600  | -9.034445463  | -5.847215229  |
| H150 | -1.500989537  | -10.326333716 | -4.804457273  |
| H151 | -4.106898441  | -7.023252829  | -2.667513473  |
| H152 | -3.333079242  | -10.377960497 | -1.814459683  |
| H153 | -5.320436668  | -8.317963519  | -2.800127063  |
| H154 | -2.768278045  | -11.299645480 | 0.235433080   |
| H155 | -1.144206850  | -8.996693025  | -0.893111700  |
| H156 | -3.926520805  | -10.195063412 | 1.010967345   |
| H157 | -1.354164443  | -4.108258425  | 0.866642886   |
| H158 | -1.792378377  | -6.630501390  | -0.474729647  |
| H159 | 0.781990511   | -7.898540573  | -0.169726091  |
| H160 | -4.827626138  | -5.390780837  | 3.790075321   |
| H161 | -3.650420988  | -6.820223400  | 1.555847550   |
| H162 | 0.551536187   | -8.537848319  | 1.475871591   |
| H163 | -2.806687715  | -4.623651429  | -0.027903943  |
| H164 | -2.401961071  | -8.092745383  | 3.683117614   |
| H165 | -5.002968903  | -7.126716646  | 3.416948012   |
| H166 | 1.194097240   | -3.859713345  | 1.784695832   |
| H167 | 0.568331204   | -2.587365506  | 0.721765650   |
| H168 | 1.949031199   | -2.244456516  | 1.779871430   |
| H169 | -0.921260628  | -2.859556257  | 2.715594850   |
| H170 | -1.437339762  | -9.171246429  | 5.490961568   |
| H171 | -3.408244640  | -1.371418862  | 3.911091139   |
| H172 | -2.658994926  | -4.627209629  | 6.913148311   |
| H173 | -4.879934119  | -2.310290162  | 7.911392776   |
| H174 | 0.614177972   | -0.224380185  | 2.447677653   |
| H175 | -0.710750466  | -0.388568268  | 3.613123145   |
| H176 | 3.963237729   | 4.117541571   | 8.830209017   |
| H177 | -5.089149150  | -1.066571626  | 4.399374983   |
| H178 | -5.918278606  | -1.608996773  | 6.649934041   |
| H179 | -3.784120928  | -0.036863710  | 5.035857167   |
| H180 | -4.681181806  | -0.605210439  | 7.443569580   |
| H181 | -4.149136075  | -3.036094867  | 5.631861076   |
| H182 | -2.148049527  | -0.985050752  | 6.726562689   |
| H183 | -1.905244739  | -3.120459089  | 4.728998781   |
| H184 | -1.023893722  | -0.647585282  | 1.900126675   |
| H185 | -1.902383332  | 3.762158814   | 1.922260394   |
| H186 | -3.070916748  | 2.754397117   | 2.826225621   |
| H187 | -2.402063417  | 4.087439548   | 4.398095579   |
| H188 | -2.188274477  | 2.740345240   | 6.663083933   |
| H189 | 0.037248888   | 4.591670682   | 4.624521911   |
| H190 | 2.495293867   | 4.544947068   | 4.946516514   |
| H191 | 1.998092356   | 1.876469034   | 8.303144805   |
| H192 | 0.30725087    | -4.705490406  | 3.877573145   |
| H193 | 2.290819949   | -6.659941652  | 4.340996905   |
| H194 | 2.022429664   | -6.574914720  | 6.095428390   |
| H195 | -0.060030619  | -6.979963552  | 4.018333484   |
| H196 | -2.295984241  | -8.088295745  | 6.610990050   |
| H197 | -0.453298265  | 1.879528759   | 7.942475717   |
| H198 | 1.598958544   | -2.245530490  | 4.316902601   |
| H199 | -3.415706781  | -4.783360863  | 9.530543385   |
| H200 | -2.311167901  | -5.954781039  | 8.755333606   |
| H201 | -0.385123031  | -4.186998210  | 9.487780440   |
| H202 | 11.518044952  | -1.156712820  | 7.604191808   |
| H203 | 3.805003540   | -3.360953485  | -5.492781050  |
| H204 | 5.372049157   | -2.927373351  | -2.085494600  |
| H205 | 4.708523295   | -1.810214406  | -9.466643813  |
| H206 | 5.250568178   | -0.172423347  | -9.016744145  |
| H207 | 2.549288127   | -1.511287008  | -8.420879070  |
| H208 | -0.509583114  | 3.539063194   | -9.549937047  |
| H209 | 2.922415423   | -0.342730394  | -10.643245046 |
| H210 | -0.323492073  | -2.352849541  | -4.004236921  |
| H211 | 0.856449189   | -5.175351041  | -3.857785629  |
| H212 | 1.172097706   | 1.931207020   | -8.450829293  |
| H213 | -1.226324868  | 1.011677991   | -9.900740657  |
| H214 | 3.247414486   | 2.102756000   | -9.026550491  |
| H215 | 3.585047492   | -3.818983638  | -3.808038588  |
| H216 | 3.031295270   | -0.021916971  | -7.606042344  |
| H217 | 4.273636527   | 1.465880996   | -10.147397046 |
| H218 | -1.700330501  | -4.761330530  | -6.392389480  |
| H219 | -0.689827545  | -3.395643270  | -2.608886163  |
| H220 | 5.999456213   | 0.153829829   | -7.040015555  |
| H221 | 1.531239483   | -3.916432205  | -2.837950950  |
| H222 | -5.248236797  | -1.621604185  | 1.229295450   |
| H223 | -2.838740482  | -1.871998042  | -0.150132989  |
| H224 | -7.143676582  | -5.564905211  | -0.551734218  |
| H225 | -5.296801615  | -4.475853177  | -2.634196811  |
| H226 | -8.212182460  | -1.940305436  | -0.615021497  |
| H227 | -12.826971616 | -0.243738477  | 1.284360853   |
| H228 | -9.737252771  | -2.518760241  | 2.081020280   |
| H229 | -10.776451308 | -2.517341918  | -0.497688053  |

|      |               |              |              |
|------|---------------|--------------|--------------|
| H230 | -9.737858620  | 0.174780654  | 0.586788757  |
| H231 | -14.293606360 | 0.461755746  | -2.626080271 |
| H232 | -5.525222759  | 0.660272115  | 0.257259759  |
| H233 | -6.210946860  | -0.025211474 | -1.224109770 |
| H234 | -14.724055776 | 0.721775093  | -0.121765833 |
| H235 | -10.108253718 | -1.275663115 | -1.556099247 |
| H236 | -6.066475552  | -2.533101131 | -1.465989662 |
| H237 | -5.389642293  | -5.785599200 | -0.523627332 |
| H238 | -8.139741685  | -3.899213082 | -4.668415083 |
| H239 | -1.948385740  | 0.993679405  | -3.164516924 |
| H240 | -7.180633262  | -5.341949526 | -5.043768838 |
| H241 | 4.272752150   | 6.347751491  | 8.033498703  |
| H242 | 3.150838906   | 5.704782911  | 7.033906656  |
| H243 | -2.645349960  | 5.690155564  | 0.737690522  |
| H244 | -4.340449384  | 3.377892422  | 1.002089781  |
| H245 | -4.357801916  | 6.501285389  | 2.676516850  |
| H246 | -4.450794737  | 1.327814437  | -2.462077093 |
| H247 | -5.721625030  | 1.486569039  | -4.088119119 |
| H248 | -5.972475847  | 0.697329082  | -6.167484344 |
| H249 | -6.552790881  | 2.106457325  | -2.880021950 |
| H250 | -3.713464232  | -0.218634001 | -5.865612749 |
| H251 | -4.988316920  | -1.228229514 | -6.614996156 |
| H252 | -7.491223546  | 9.065979450  | 0.535692181  |
| H253 | -9.251791502  | 9.243678550  | 0.361318041  |
| H254 | -6.642365520  | 8.129227812  | -1.264515966 |
| H255 | -7.418552838  | 6.817571523  | -2.156843737 |
| H256 | -7.281605673  | 7.384889535  | -5.040105852 |
| H257 | -3.698811931  | 4.645896572  | -5.240843909 |
| H258 | -10.824373793 | 2.475606060  | -2.385505677 |
| H259 | -8.502745118  | 3.484742417  | 1.895687183  |
| H260 | -7.798348616  | 4.320588636  | -3.354129870 |
| H261 | -1.942833232  | 6.105984150  | -1.732908736 |
| H262 | -2.429584144  | 7.787514876  | -0.216626467 |
| H263 | -3.465242508  | 4.223079605  | -2.575920274 |
| H264 | -5.336867412  | -3.997703572 | -5.386710215 |
| H265 | -3.170149319  | 10.893094525 | 0.156350774  |
| H266 | -2.871973374  | -2.568537870 | -5.750917746 |
| H267 | -2.619143951  | 7.164173412  | -2.969152933 |
| H268 | -7.181000952  | 3.051675787  | -0.132931679 |
| H269 | -4.031553400  | 10.194372046 | 1.543141347  |
| H270 | -5.630913472  | 7.082463950  | -5.484362000 |
| H271 | -8.570389587  | 5.546750133  | -4.304490762 |
| H272 | -0.410331394  | -3.730789514 | -6.128265223 |
| H273 | -1.577265015  | -5.143050513 | -4.133777553 |
| H274 | -12.154965679 | 3.052924019  | -0.372712059 |
| H275 | -4.259039664  | -1.162926339 | -3.637715242 |
| H276 | -4.839058871  | 7.118082333  | -1.846343891 |
| H277 | -4.015643523  | 6.303072720  | -4.725305614 |
| H278 | -2.139842787  | 4.770225514  | -3.593028916 |
| H279 | -5.571945303  | 3.904707523  | -3.772912787 |
| H280 | -6.236801742  | 5.476434810  | 4.643583550  |
| H281 | -6.966507673  | 6.630021153  | 1.715439422  |
| H282 | -8.725460803  | 8.743399502  | 2.627699488  |
| H283 | -5.366038897  | 7.029318486  | 4.658262549  |
| H284 | -9.376740528  | 5.459965297  | 2.314323327  |
| H285 | 7.424235384   | 4.485196414  | -5.992017524 |
| H286 | 8.158191945   | 2.967015070  | -5.443547722 |
| H287 | 10.143164642  | 2.747124653  | -1.411833119 |
| H288 | 9.469738137   | 3.839227262  | -7.224625510 |
| H289 | 8.645971973   | 2.583978241  | -7.877036559 |
| H290 | 0.733686271   | 6.602023032  | 2.922659657  |
| H291 | -1.225069315  | 8.063721285  | 4.727175753  |
| H292 | -1.210898729  | 9.888651929  | 0.881275553  |
| H293 | -1.000909288  | 6.171882691  | 3.095288451  |
| H294 | -0.589277788  | 9.538815688  | 4.416729866  |
| H295 | 3.296411862   | 7.836742510  | -2.398022097 |
| H296 | 0.145693947   | 8.892580347  | 2.267522589  |
| H297 | 7.097703521   | -4.492174359 | 5.454934421  |
| H298 | 9.545943477   | -3.142405776 | 4.192738779  |
| H299 | 3.178238418   | 5.947879548  | -3.677688090 |
| H300 | 2.631366733   | 1.051726735  | 5.343006584  |
| H301 | 1.465451905   | 5.353097909  | -6.750410486 |
| H302 | 1.783939402   | -0.232050005 | -4.646169936 |
| H303 | 0.560405866   | 4.840710265  | -5.324877712 |
| H304 | 4.849866962   | -3.047626654 | 5.055291838  |
| H305 | 2.987169349   | 4.097502895  | -4.483515615 |
| H306 | 5.389196093   | -2.789412599 | 3.396497769  |
| H307 | 7.375417710   | -4.178690225 | 3.726584768  |
| H308 | 7.477385133   | -1.672787428 | 4.274511717  |
| H309 | 6.966682291   | -2.059427603 | 5.929353543  |
| H310 | -1.503988482  | -0.429761179 | -8.074301904 |
| H311 | 9.223505266   | -5.896719903 | 5.329552357  |



|       |               |              |              |
|-------|---------------|--------------|--------------|
| H312  | 10.673878965  | -7.343054301 | 3.047609674  |
| H313  | 1.246807520   | 1.844747596  | -3.359293822 |
| H314  | 10.890049553  | -7.709853550 | 5.934235099  |
| H315  | 10.170164755  | -8.660894357 | 4.810784794  |
| H316  | 5.377835226   | -0.373934037 | 3.802026171  |
| H317  | -0.695780981  | 3.219479192  | -3.984639081 |
| H318  | 0.429090358   | -0.831928338 | -6.640292466 |
| H319  | 12.385840212  | -2.370454984 | 0.429868032  |
| H320  | 10.689118079  | -0.273132460 | -1.443711017 |
| H321  | 10.137262376  | -2.364812930 | 1.602401202  |
| H322  | 12.477951385  | -2.725241707 | -1.084384020 |
| H323  | 4.086783368   | 8.690664116  | -4.984091696 |
| H324  | 7.932186998   | -0.191963760 | 1.912169420  |
| H325  | 6.619493353   | -4.817088870 | 0.329580892  |
| H326  | 5.445531962   | 3.738547547  | -5.152119796 |
| H327  | 8.532743664   | -4.643977639 | -1.008030883 |
| H328  | 8.496013871   | -0.092466865 | -5.781702107 |
| H329  | 6.464828833   | -0.385779747 | -4.296546772 |
| H330  | 12.095742944  | -7.019708991 | 4.047588813  |
| H331  | 3.829848891   | 1.242269428  | 4.081668248  |
| H332  | 9.544977027   | -0.154900423 | 3.665469311  |
| H333  | 7.670547092   | 1.143482815  | 2.666678481  |
| H334  | 10.169099895  | -1.508581110 | 5.504521327  |
| H335  | 3.294446384   | -2.351822385 | 5.970766427  |
| H336  | 9.082555680   | -2.282029178 | -2.879641558 |
| H337  | 9.832205560   | -2.450066760 | -1.287328564 |
| H338  | 7.692678241   | -4.288442604 | -2.525205601 |
| H339  | 3.844133059   | 1.908092361  | -4.953942425 |
| H340  | -2.051971598  | 2.640600658  | -6.016605843 |
| H341  | -2.608056426  | 0.942486627  | -7.800057392 |
| H342  | 5.503152091   | -3.455482673 | 0.538995724  |
| H343  | 10.724708259  | -1.093302510 | 3.289472100  |
| H344  | 11.199074037  | -3.092453308 | 2.456185343  |
| H345  | 2.175133737   | -1.097535184 | 6.154508263  |
| H346  | 10.585523908  | 0.568021621  | -4.443073652 |
| H347  | 9.353818390   | 0.490613000  | -0.596300237 |
| H348  | 4.121385602   | 1.559347715  | -6.685221566 |
| H349  | 1.750728312   | 8.398797008  | -3.065170588 |
| H350  | 4.250127820   | 2.240800435  | 7.277888005  |
| H351  | 4.442864315   | 3.349633183  | 5.898891159  |
| H352  | 12.287289594  | 2.920545536  | -2.342114037 |
| H353  | 12.530991826  | 1.302127723  | -2.347535512 |
| H354  | 13.360328927  | 0.064796860  | 1.963703426  |
| H355  | 12.183598333  | 0.016556049  | 0.010069097  |
| H356  | 14.133294248  | 2.517879179  | 1.040762012  |
| H357  | 11.992924798  | 0.975181549  | 2.638977198  |
| H358  | 6.517084283   | 4.626455180  | 7.175624927  |
| H359  | -11.973247160 | 6.081211407  | 4.208936476  |
| H360  | 10.324236364  | -2.188280694 | 8.433795528  |
| H361  | 8.597400299   | -0.203790318 | 7.610983381  |
| H362  | -12.001328470 | 5.612291441  | 1.225325882  |
| H363  | -10.754076052 | 3.456661895  | 3.041023239  |
| H364  | -12.238544804 | 3.275799794  | 2.090867723  |
| H365  | 3.300232378   | -1.399427628 | -0.810372191 |
| H366  | -8.721276138  | 2.080922650  | -3.198871022 |
| H367  | 0.699375797   | -0.502262018 | -0.033807096 |
| H368  | 2.729082023   | -0.411810845 | 0.642534776  |
| H369  | -1.053950155  | -0.890178055 | -1.738313092 |
| Mo370 | 6.143104553   | -0.108857182 | -1.002172940 |
| N371  | -0.090652412  | -8.841754031 | -5.229168419 |
| N372  | -3.475793924  | -8.792067617 | -3.636674727 |
| N373  | -3.453036282  | -9.776476068 | -1.002714645 |
| N374  | -1.003346311  | -8.937449644 | 0.116312046  |
| N375  | -1.450221403  | -6.143823368 | 0.350490304  |
| N376  | -3.537032131  | -6.145337099 | 2.314898040  |
| N377  | -2.462141545  | -7.605323907 | 4.581793871  |
| N378  | 0.302664324   | -6.869107054 | 4.967589096  |
| N379  | 0.715058254   | -4.121941598 | 4.358626224  |
| N380  | -1.529238890  | -2.509173657 | 5.457368481  |
| N381  | -2.397821017  | -4.133776060 | 7.770593899  |
| N382  | 10.312784747  | -7.689076909 | 5.090483673  |
| N383  | 9.610105942   | -5.119922727 | 4.783008357  |
| N384  | 4.909931267   | -1.037195812 | 4.422499775  |
| N385  | 3.164835375   | -1.334871887 | 5.978971472  |
| N386  | 3.330040388   | 0.620970983  | 4.742920568  |
| N387  | 10.022351083  | -2.039472162 | 6.391381558  |
| N388  | -1.404123852  | -3.916716686 | -5.899137109 |
| N389  | 3.175377268   | -3.626775692 | -4.728129493 |
| N390  | -3.433461505  | -2.622162227 | -4.882981685 |
| N391  | -6.052201296  | -3.622114403 | -4.767587516 |
| N392  | -6.174099949  | -4.802819827 | -2.215276302 |
| N393  | -5.975360154  | -2.631736634 | -0.450258860 |

|      |               |              |               |
|------|---------------|--------------|---------------|
| N394 | -3.772861004  | 0.639724781  | -2.030208942  |
| N395 | -2.037168363  | -0.598373416 | -1.703462097  |
| N396 | -8.360584858  | -1.381323706 | 0.221390239   |
| N397 | -12.455786414 | -0.486930891 | -2.017050125  |
| N398 | -13.897837935 | 0.281410241  | -0.517460523  |
| N399 | 4.137841570   | 5.646987390  | 7.300533425   |
| N400 | -0.459817971  | 8.538943460  | 4.238240742   |
| N401 | -2.073713911  | 9.497698265  | 1.250603011   |
| N402 | -3.386150995  | 7.890083187  | -0.571352660  |
| N403 | -5.437829751  | 4.872380370  | -4.115175134  |
| N404 | -6.475796527  | 6.768093195  | -5.021827314  |
| N405 | -7.721241548  | 5.205876900  | -3.860986498  |
| N406 | -3.606413385  | 5.307047124  | 0.667579306   |
| N407 | -5.179037565  | 5.929426378  | 2.894545997   |
| N408 | -7.630382048  | 7.034006484  | 2.375169373   |
| N409 | -7.487038850  | 7.594847942  | -1.503015959  |
| N410 | -10.236682226 | 6.002833381  | 2.298189229   |
| N411 | 8.536088298   | 3.531787242  | -7.505612334  |
| N412 | 5.332388748   | 3.045968720  | -5.898039118  |
| N413 | 2.571911309   | 4.211796228  | -5.423768545  |
| N414 | 2.632606113   | 6.737390189  | -4.034009125  |
| N415 | 3.287339568   | 1.559011585  | -9.896377649  |
| N416 | 0.584887550   | 1.294319660  | -8.998414710  |
| N417 | 11.806613374  | 2.021253747  | -2.439515450  |
| N418 | 7.803568670   | 0.142765911  | -2.689599711  |
| N419 | 8.503691035   | 0.076190958  | -4.779213747  |
| N420 | 12.141674120  | 0.906093232  | 0.513425296   |
| N421 | -2.325482982  | 1.590412050  | 0.637942680   |
| N422 | -1.540205698  | 1.926447444  | -0.074067016  |
| O423 | -1.500304285  | -7.959714442 | -2.871503098  |
| O424 | -4.104562923  | -7.728686680 | -0.243529568  |
| O425 | -1.871967511  | -9.318938939 | 2.192355476   |
| O426 | -0.052138270  | -6.178002831 | 2.144639269   |
| O427 | -2.771397042  | -4.093189998 | 2.942778619   |
| O428 | -3.564176037  | -6.055654169 | 5.851671914   |
| O429 | 0.041156588   | -7.371375912 | 7.192176099   |
| O430 | 2.641622226   | -4.164729893 | 5.614937935   |
| O431 | 0.260562191   | -1.289154245 | 6.186422259   |
| O432 | -2.165466107  | -2.172266140 | 8.890716596   |
| O433 | -1.427548839  | -4.660458470 | 11.177958200  |
| O434 | 11.325338252  | -4.677130587 | 3.297012747   |
| O435 | 9.224794901   | -3.959785892 | 7.369700928   |
| O436 | 10.042454247  | 0.653729240  | 8.769070655   |
| O437 | -3.392308191  | -3.720568022 | -2.866165129  |
| O438 | 1.356849318   | -3.324225219 | -6.060731761  |
| O439 | -6.606984218  | -1.913956643 | -3.355552041  |
| O440 | -5.687220168  | 0.269488348  | -5.340388587  |
| O441 | -8.412034595  | -5.217965828 | -2.513249463  |
| O442 | -6.048584441  | -4.023951388 | 1.360029316   |
| O443 | -7.382174703  | -0.447119729 | 2.062968697   |
| O444 | -10.909488267 | -0.945418276 | 2.645464462   |
| O445 | 6.454883829   | 3.533658245  | 8.898972604   |
| O446 | -1.713290239  | 3.284704535  | 6.008527868   |
| O447 | -3.029474100  | 8.138770482  | 2.809761126   |
| O448 | -5.246219898  | 9.236811480  | -0.554453229  |
| O449 | -5.466728899  | 5.017530125  | -0.634165391  |
| O450 | -5.997965325  | 3.784068750  | 2.869952158   |
| O451 | -2.690409422  | 4.636480681  | 3.639746309   |
| O452 | -7.903842676  | 7.674326211  | 4.559222650   |
| O453 | -11.105375428 | 8.056279116  | 1.824171964   |
| O454 | -9.440988421  | 6.702017853  | -0.725117716  |
| O455 | -13.652746057 | 5.411924855  | 3.259335292   |
| O456 | -8.146353371  | 2.493210763  | -2.525039022  |
| O457 | 6.432072569   | 1.722494615  | -7.420466306  |
| O458 | 2.380074882   | 3.225620910  | -7.481851733  |
| O459 | 1.015567424   | 7.521506215  | -5.432443464  |
| O460 | 3.467303866   | 10.250893488 | -3.823191925  |
| O461 | 0.471927187   | -0.529343595 | -10.361491540 |
| O462 | 4.959104610   | -2.742750020 | -7.024266506  |
| O463 | 5.889533575   | -0.755540466 | -6.623035847  |
| O464 | -2.281988290  | 3.365040333  | -8.561966760  |
| O465 | 11.459939153  | 3.061314260  | 0.680263308   |
| O466 | 13.946621090  | 2.660272754  | 3.068020783   |
| O467 | 4.740031078   | -3.806906295 | -2.186830089  |
| O468 | 4.616086811   | -5.728928356 | -1.027555489  |
| O469 | 11.728883350  | -3.593298155 | -2.413196388  |
| O470 | 10.185224233  | -4.757851573 | -3.588107918  |
| O471 | 7.773293474   | -0.953937549 | 0.223014939   |
| O472 | 8.533943864   | -2.871435819 | 1.116472289   |
| O473 | 6.404534188   | -2.111461777 | -1.668487158  |
| O474 | 10.395711542  | -0.508717277 | 4.026758853   |
| O475 | 7.919416683   | 0.212428187  | 2.817355027   |

|                                                               |      |               |                                 |              |
|---------------------------------------------------------------|------|---------------|---------------------------------|--------------|
|                                                               | O476 | -5.668240365  | 2.126813191                     | -3.326043901 |
|                                                               | O477 | 12.989887594  | -2.285092118                    | -0.341935968 |
|                                                               | O478 | 11.054020687  | -2.242156567                    | 1.969283555  |
|                                                               | S479 | -0.368619529  | 6.336333574                     | 0.755692950  |
|                                                               | S480 | 0.977889960   | 3.867753375                     | -1.488841891 |
|                                                               | S481 | 4.399663586   | 0.142375278                     | -2.625496792 |
|                                                               | S482 | 1.123483593   | 2.822407785                     | 1.921538025  |
|                                                               | S483 | 1.208981842   | 0.186719695                     | -1.089430751 |
|                                                               | S484 | 4.589522138   | 4.060091821                     | -2.783910107 |
|                                                               | S485 | 4.886497223   | -0.639414042                    | 0.924782810  |
|                                                               | S486 | 3.333986907   | 5.443192885                     | 0.762489505  |
|                                                               | S487 | 6.707936282   | 2.157333258                     | -0.526538242 |
|                                                               | S488 | 4.924407650   | 2.663633443                     | 2.743468169  |
|                                                               | end  |               |                                 |              |
| <b>rest-S2BH-6Hx-6Hn</b><br><b>2N2 TS</b><br><b>35, S=3/2</b> |      |               | <b>bm522bh6x6hn2n2xt3g_orig</b> |              |
| <b>Fe(139) -2.291</b>                                         | C1   | -7.243096966  | -5.885086551                    | -2.315323398 |
| <b>Fe(140) -1.029</b>                                         | C2   | -7.280278125  | -6.850707645                    | -3.504106792 |
| <b>Fe(141) -2.486</b>                                         | C3   | -8.483070566  | -4.187104981                    | -1.050046077 |
| <b>Fe(142) 2.754</b>                                          | C4   | -8.225744449  | -4.641974756                    | 0.383327549  |
| <b>Fe(143) 2.806</b>                                          | C5   | -8.280967308  | -6.462178330                    | 2.010717472  |
| <b>Fe(144) 2.306</b>                                          | C6   | -6.805321281  | -6.453868280                    | 2.417610095  |
| <b>Fe(145) 0.760</b>                                          | C7   | -4.473982942  | -6.500921993                    | 1.705934864  |
|                                                               | C8   | -4.052782993  | -5.072632135                    | 2.054208957  |
|                                                               | C9   | -4.376960588  | -2.686296760                    | 1.624333658  |
|                                                               | C10  | -4.805093956  | -2.273039871                    | 3.040209094  |
|                                                               | C11  | -6.473722498  | -2.405014516                    | 4.794307306  |
|                                                               | C12  | -5.757365119  | -3.131261896                    | 5.940243705  |
|                                                               | C13  | -5.090410401  | -5.294004211                    | 6.879595538  |
|                                                               | C14  | -3.570148972  | -5.477215465                    | 6.972542889  |
|                                                               | C15  | -1.467821354  | -5.778951379                    | 5.732751959  |
|                                                               | C16  | -0.543524847  | -4.588389358                    | 5.460745234  |
|                                                               | C17  | -0.378707890  | -2.307305088                    | 4.452210002  |
|                                                               | C18  | -0.531057545  | -1.293312396                    | 5.611578780  |
|                                                               | C19  | -0.855158924  | -1.756618535                    | 3.091540818  |
|                                                               | C20  | -0.293192420  | -0.352931664                    | 2.803078268  |
|                                                               | C21  | -0.505401072  | -2.743508799                    | 1.972774748  |
|                                                               | C22  | -2.079967599  | 0.124326593                     | 6.918301931  |
|                                                               | C23  | -2.198305207  | -0.504361214                    | 8.321383101  |
|                                                               | C24  | -3.329846823  | 0.96338351                      | 6.550374007  |
|                                                               | C25  | -3.720207430  | 1.915383689                     | 7.687792067  |
|                                                               | C26  | -3.096303341  | 1.746996551                     | 5.252369399  |
|                                                               | C27  | -3.321496610  | -2.069637488                    | 9.800521341  |
|                                                               | C28  | -2.057673579  | -2.373362355                    | 10.577434528 |
|                                                               | C29  | 5.502492086   | -11.867737162                   | 3.777727409  |
|                                                               | C30  | 6.086962785   | -10.468998288                   | 3.596991547  |
|                                                               | C31  | 5.927609840   | -8.134622282                    | 4.459281676  |
|                                                               | C32  | 6.743588359   | -7.865655966                    | 5.738501574  |
|                                                               | C33  | 4.661504812   | -7.263994064                    | 4.399189517  |
|                                                               | C34  | 4.964749971   | -5.765982572                    | 4.415008342  |
|                                                               | C35  | 3.721285450   | -4.933202539                    | 4.103101705  |
|                                                               | C36  | 3.533434297   | -2.476834918                    | 4.652475802  |
|                                                               | C37  | 8.812335355   | -6.921334512                    | 6.644870053  |
|                                                               | C38  | 8.912002494   | -5.446791687                    | 6.965114637  |
|                                                               | C39  | -4.311512225  | -2.612127411                    | -3.673955121 |
|                                                               | C40  | -4.953496885  | -1.313738312                    | -3.151258772 |
|                                                               | C41  | -2.870360042  | -2.695151870                    | -3.118146122 |
|                                                               | C42  | -2.169735789  | -4.060776349                    | -3.272033000 |
|                                                               | C43  | -1.406760078  | -4.267176080                    | -4.579882767 |
|                                                               | C44  | -5.349148009  | 1.040585137                     | -3.779492750 |
|                                                               | C45  | -6.750737529  | 1.251652590                     | -3.191501444 |
|                                                               | C46  | -5.085729433  | 1.900847094                     | -5.023208746 |
|                                                               | C47  | -9.047712329  | 0.413244855                     | -3.032639162 |
|                                                               | C48  | -9.136317934  | 0.217170724                     | -1.514309633 |
|                                                               | C49  | -8.011068671  | -0.509731862                    | 0.541507574  |
|                                                               | C50  | -7.072445961  | 0.444454729                     | 1.278527100  |
|                                                               | C51  | -5.526914862  | 2.336256643                     | 1.182821303  |
|                                                               | C52  | -6.320426011  | 3.466065773                     | 1.880455267  |
|                                                               | C53  | -4.597960346  | 3.031951420                     | 0.179554781  |
|                                                               | C54  | -3.645551413  | 2.155579724                     | -0.563243089 |
|                                                               | C55  | -3.159971811  | 0.887410454                     | -0.357452346 |
|                                                               | C56  | -2.162277192  | 1.708137236                     | -2.174566356 |
|                                                               | C57  | -8.258407172  | 4.968018749                     | 1.637371029  |
|                                                               | C58  | -8.727850727  | 4.825316009                     | 3.084157599  |
|                                                               | C59  | -9.473250767  | 5.051290718                     | 0.685290378  |
|                                                               | C60  | -10.157170263 | 6.383554676                     | 0.587725487  |
|                                                               | C61  | -10.447311518 | 7.333304783                     | 1.548170661  |
|                                                               | C62  | -11.171022377 | 7.998265461                     | -0.438327716 |
|                                                               | C63  | 7.285569138   | 1.279450699                     | 6.699784783  |
|                                                               | C64  | 8.419432344   | 0.269672741                     | 6.707387366  |
|                                                               | C65  | 6.102543979   | 0.623750181                     | 5.943859096  |
|                                                               | C66  | 4.877977015   | 1.505447433                     | 5.893526534  |

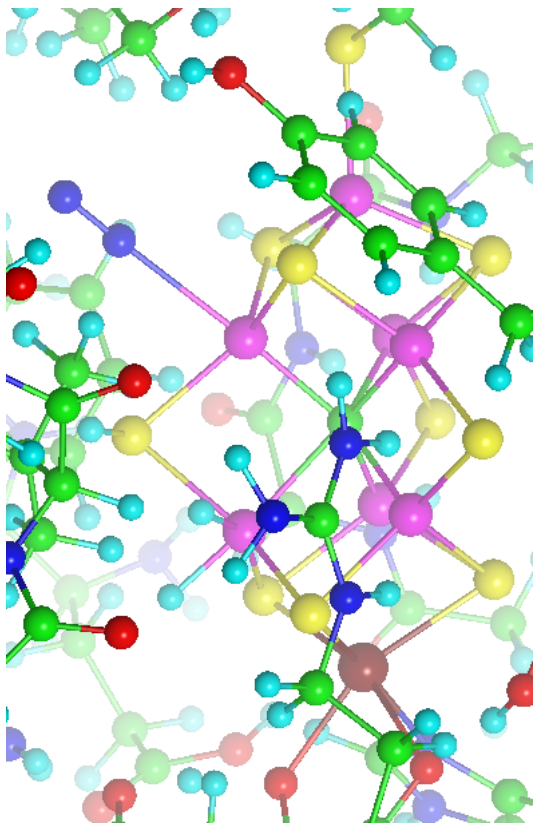

|       |              |              |              |
|-------|--------------|--------------|--------------|
| C67   | 3.897981359  | 1.455450498  | 6.901353806  |
| C68   | 4.682141654  | 2.406746365  | 4.830639712  |
| C69   | 2.757827578  | 2.265601452  | 6.851143737  |
| C70   | 3.560881868  | 3.235046483  | 4.777335801  |
| C71   | 2.592343750  | 3.153423600  | 5.780718506  |
| C72   | 4.720881272  | 7.172908058  | 1.711513969  |
| C73   | 3.700978386  | 8.249773504  | 1.306893888  |
| C74   | 4.090755760  | 5.783677356  | 1.616688590  |
| C75   | 3.148109930  | 10.046125384 | -0.288805327 |
| C76   | 1.840196203  | 9.641872324  | -0.972320174 |
| C77   | 0.496976515  | 7.724109887  | -1.807791410 |
| C78   | -0.386811876 | 7.109923929  | -0.690465873 |
| C79   | 0.943139309  | 6.658291554  | -2.839166535 |
| C80   | -0.118659897 | 5.769985548  | -3.500310190 |
| C81   | -0.959039525 | 6.409683393  | -4.619231840 |
| C82   | -2.742782526 | 8.143797586  | -4.370139919 |
| C83   | -0.537491711 | 5.846631316  | 1.401559025  |
| C84   | -1.100732410 | 6.899625528  | 2.365929472  |
| C85   | 0.260260374  | 4.829690703  | 2.246794254  |
| C86   | -0.490515913 | 8.837902757  | 3.722438430  |
| C87   | -1.168746820 | 10.162394522 | 3.418768242  |
| C88   | -2.149483072 | 11.584591595 | 1.711623437  |
| C89   | -3.623883692 | 11.954368881 | 2.014945944  |
| C90   | -1.826001558 | 11.866073372 | 0.241784911  |
| C91   | -2.635210616 | 11.023550171 | -0.733561918 |
| C92   | -5.865894920 | 11.143607137 | 2.603578521  |
| C93   | -6.246504506 | 12.020951731 | 3.786492527  |
| C94   | -6.544817375 | 9.749260916  | 2.732108432  |
| C95   | -6.319184030 | 8.879116650  | 1.515963896  |
| C96   | -7.198983360 | 8.941461643  | 0.422801385  |
| C97   | -5.208969809 | 8.022266190  | 1.422119398  |
| C98   | -6.972171828 | 8.190773915  | -0.732584583 |
| C99   | -4.948482967 | 7.287224925  | 0.262235225  |
| C100  | -5.834715447 | 7.386122088  | -0.806275584 |
| C101  | 7.132435258  | -2.012317680 | -7.469946487 |
| C102  | 5.618556301  | -1.925211563 | -7.529395586 |
| C103  | 3.634240487  | -0.763884817 | -6.588393709 |
| C104  | 3.194067749  | 0.644017050  | -7.006754200 |
| C105  | 3.304521224  | 3.028575700  | -6.441676868 |
| C106  | 4.345016454  | 4.063164649  | -6.022091573 |
| C107  | 6.244009689  | 4.700891296  | -4.632959588 |
| C108  | 7.332080224  | 5.070528368  | -5.624058433 |
| C109  | 0.714432354  | -1.866174108 | -9.895489744 |
| C110  | -0.477383470 | -0.912374686 | -9.752184055 |
| C111  | 0.815991544  | -2.767900414 | -8.643994966 |
| C112  | 1.727281564  | -3.982107006 | -8.906269812 |
| C113  | 2.049964037  | -4.690982950 | -7.610906899 |
| C114  | -1.322094675 | 1.220895813  | -8.911875130 |
| C115  | -0.804815383 | 2.629434409  | -9.133950326 |
| C116  | -2.155284319 | 1.036687815  | -7.618822666 |
| C117  | -1.267346929 | 0.914918941  | -6.411048700 |
| C118  | -0.757944615 | 2.058422993  | -5.773753620 |
| C119  | -0.806292794 | -0.349595764 | -6.005279286 |
| C120  | 0.241453124  | 1.938959239  | -4.803082264 |
| C121  | 0.192977986  | -0.468135517 | -5.036640803 |
| C122  | 0.740497689  | 0.679803520  | -4.456409230 |
| C123  | 9.560292173  | -4.886341773 | -2.695015689 |
| C124  | 10.376468910 | -5.116545896 | -1.412593377 |
| C125  | 8.145859547  | -5.472821265 | -2.567215877 |
| C126  | 7.191489866  | -5.153929168 | -3.675599938 |
| C127  | 7.307895723  | -5.497908195 | -5.006925357 |
| C128  | 5.303226863  | -4.630131816 | -4.651430239 |
| C129  | 11.087691539 | -6.597207255 | 0.371054730  |
| C130  | 12.534342644 | -6.166388357 | 0.272348858  |
| C131  | 1.274881577  | -6.771190160 | -1.078055596 |
| C132  | 2.585520375  | -6.836193457 | -0.297663755 |
| C133  | 3.865144348  | -6.677935505 | -1.169314788 |
| C134  | 4.127264223  | -7.981541458 | -1.971156058 |
| C135  | 5.488247096  | -8.063933450 | -2.668692210 |
| C136  | 5.794517772  | -9.445417596 | -3.291246237 |
| C137  | 5.074778518  | -6.427608534 | -0.255226224 |
| C138  | 4.051336275  | -0.179192730 | -0.836849919 |
| Fe139 | 4.774048327  | -1.142883526 | -2.421780176 |
| Fe140 | 2.434872060  | 0.890877267  | -0.559732101 |
| Fe141 | 4.854994998  | 0.863347987  | 0.623885108  |
| Fe142 | 4.720563580  | 1.342026110  | -1.931485749 |
| Fe143 | 3.787468845  | 3.126346829  | -0.134590970 |
| Fe144 | 5.109362797  | -1.605053589 | 0.077332064  |
| Fe145 | 2.710020924  | -1.966543037 | -0.914864295 |
| H146  | -5.494320664 | -7.786493980 | -3.195131086 |
| H147  | -5.410717041 | -6.572908116 | -4.283603115 |
| H148  | -9.187730160 | -5.335225588 | -2.704543652 |

|      |               |              |               |
|------|---------------|--------------|---------------|
| H149 | -7.810195402  | -6.361902099 | -4.337334463  |
| H150 | -7.911645225  | -7.703886767 | -3.201684981  |
| H151 | -7.742697325  | -3.401591445 | -1.262927877  |
| H152 | -8.908226683  | -6.522878778 | -0.048305382  |
| H153 | -9.482663067  | -3.734279073 | -1.092443317  |
| H154 | -8.648936596  | -7.496092680 | 2.039607614   |
| H155 | -6.204993599  | -6.638057679 | 0.449805177   |
| H156 | -8.823472673  | -5.884938972 | 2.771993680   |
| H157 | -3.305992375  | -2.464062434 | 1.540454379   |
| H158 | -5.314265963  | -4.324100746 | 0.613428126   |
| H159 | -3.909388517  | -6.840638469 | 0.827093850   |
| H160 | -6.339586496  | -1.329029150 | 4.959478465   |
| H161 | -6.587732239  | -3.286288013 | 2.829536103   |
| H162 | -4.202642845  | -7.134422023 | 2.559119318   |
| H163 | -4.916669353  | -2.083832446 | 0.879837924   |
| H164 | -5.960929182  | -4.940159083 | 4.957930119   |
| H165 | -7.546241217  | -2.637818874 | 4.843809070   |
| H166 | -0.929732191  | -3.740908519 | 2.152542262   |
| H167 | -0.893628262  | -2.391653146 | 1.003290009   |
| H168 | 0.585484870   | -2.846075250 | 1.868730516   |
| H169 | -1.951357959  | -1.670288041 | 3.158713051   |
| H170 | -5.535586361  | -6.295593091 | 6.786046661   |
| H171 | -2.883878736  | 1.086561086  | 4.400082139   |
| H172 | -3.685269799  | -1.836418120 | 7.718571638   |
| H173 | -3.973468695  | 1.382543668  | 8.615367010   |
| H174 | 0.667686326   | -0.396906464 | 2.268248243   |
| H175 | -0.125222039  | 0.239180355  | 3.714173484   |
| H176 | 6.974375109   | 1.436381202  | 7.750498258   |
| H177 | -3.989832112  | 2.338812670  | 5.005058130   |
| H178 | -4.598591258  | 2.504201236  | 7.386425381   |
| H179 | -2.251107604  | 2.444746812  | 5.371207513   |
| H180 | -2.902481909  | 2.617831838  | 7.913737394   |
| H181 | -4.168691414  | 0.261699852  | 6.390490776   |
| H182 | -1.206170990  | 0.788023924  | 6.986185033   |
| H183 | -2.563670671  | -1.175028138 | 5.279831119   |
| H184 | -1.003030355  | 0.221268177  | 2.187736726   |
| H185 | 0.901244271   | 4.230637513  | 1.582166318   |
| H186 | -0.477307837  | 4.165427773  | 2.722798260   |
| H187 | 1.127371056   | 4.894850999  | 4.012293003   |
| H188 | 0.881080602   | 3.830127946  | 6.409271257   |
| H189 | 3.416797550   | 3.919858505  | 3.941399750   |
| H190 | 5.406933530   | 2.445654075  | 4.014653475   |
| H191 | 4.015651196   | 0.764381071  | 7.740290342   |
| H192 | -2.046244526  | -3.642233572 | 4.455684748   |
| H193 | -1.270209431  | -6.527159807 | 4.949650309   |
| H194 | -1.159394021  | -6.207501149 | 6.693506177   |
| H195 | -3.395668135  | -5.415400723 | 4.906678601   |
| H196 | -5.412337857  | -4.865182050 | 7.836448355   |
| H197 | 1.995058123   | 2.193660589  | 7.630228629   |
| H198 | 0.689943580   | -2.542167505 | 4.399330487   |
| H199 | -3.949567677  | -1.384636950 | 10.394093781  |
| H200 | -3.861817178  | -3.022564973 | 9.680894011   |
| H201 | -1.181815206  | -2.686802058 | 9.964071386   |
| H202 | 9.821426922   | -7.322455435 | 6.462437208   |
| H203 | 0.239052703   | -5.210784011 | -5.350853962  |
| H204 | 2.327085728   | -5.619654527 | -2.220365795  |
| H205 | 1.204731143   | -4.689946828 | -9.565077133  |
| H206 | 2.653626793   | -3.663453030 | -9.405910378  |
| H207 | -0.182658848  | -3.127893944 | -8.352804999  |
| H208 | 0.062335082   | 2.691559546  | -9.831943573  |
| H209 | 0.428343140   | -2.512435488 | -10.738802065 |
| H210 | -2.260842473  | -1.909573750 | -3.595756140  |
| H211 | -2.910837048  | -4.874817486 | -3.194068575  |
| H212 | 0.675327608   | 0.457822965  | -8.697177359  |
| H213 | -2.010449754  | 1.048746779  | -9.764771474  |
| H214 | 2.350867018   | -0.644129306 | -9.508104644  |
| H215 | 0.078120914   | -5.366594122 | -3.606511819  |
| H216 | 1.191327306   | -2.169351568 | -7.799355575  |
| H217 | 2.630485714   | -1.817564124 | -10.630937335 |
| H218 | -5.141662781  | -3.158987257 | -5.480983380  |
| H219 | -2.925891432  | -2.468725951 | -2.042546043  |
| H220 | 3.770746360   | -3.738983526 | -7.582930392  |
| H221 | -1.481293206  | -4.205832533 | -2.426324370  |
| H222 | -4.949923574  | 1.835077140  | 1.972537751   |
| H223 | -3.387658968  | 0.156036657  | 0.407819967   |
| H224 | -9.020811573  | -0.329737004 | 0.935949196   |
| H225 | -7.242295256  | -0.640152816 | -1.445989055  |
| H226 | -7.814004786  | 3.213888629  | 0.494095662   |
| H227 | -10.247001621 | 7.382462205  | 2.612976253   |
| H228 | -8.949888774  | 3.771331036  | 3.380901683   |
| H229 | -10.193098781 | 4.256415024  | 0.950363146   |
| H230 | -7.639946365  | 5.875351011  | 1.551581998   |

|      |               |               |              |
|------|---------------|---------------|--------------|
| H231 | -11.639540661 | 8.630391454   | -1.187988837 |
| H232 | -4.014718580  | 3.782484361   | 0.737614941  |
| H233 | -5.212168878  | 3.581810611   | -0.551339056 |
| H234 | -11.434588659 | 9.212662304   | 1.291287588  |
| H235 | -9.114954875  | 4.814171924   | -0.328972203 |
| H236 | -6.563727729  | 1.441446369   | -0.477723345 |
| H237 | -7.733732325  | -1.537315767  | 0.821303404  |
| H238 | -9.535846255  | 1.372773872   | -3.250238620 |
| H239 | -1.504400665  | 1.799322626   | -3.036843711 |
| H240 | -9.636111537  | -0.376263360  | -3.517838304 |
| H241 | 8.367708447   | 3.017611299   | 6.625222845  |
| H242 | 6.931619669   | 3.107344441   | 5.850204254  |
| H243 | 1.247565494   | 6.177979771   | 0.228253902  |
| H244 | -1.408557285  | 5.333533921   | 0.969567475  |
| H245 | 0.659746957   | 7.942373107   | 2.195453591  |
| H246 | -3.233851191  | 3.562442050   | -2.151924867 |
| H247 | -4.408690309  | 4.363679133   | -3.634363703 |
| H248 | -5.403310458  | 3.764933038   | -5.545640018 |
| H249 | -4.534059321  | 5.410118085   | -2.441410607 |
| H250 | -4.048668382  | 1.720022544   | -5.351292982 |
| H251 | -5.769765078  | 1.609164389   | -5.833972518 |
| H252 | -0.745507048  | 11.757915369  | 0.075062011  |
| H253 | -2.093443577  | 12.918147071  | 0.058153544  |
| H254 | -0.885650114  | 10.391574013  | -1.644313022 |
| H255 | -2.401497368  | 9.731530333   | -2.261388912 |
| H256 | -2.422853433  | 10.000743073  | -5.184311328 |
| H257 | -1.162904146  | 5.666687753   | -5.405444329 |
| H258 | -7.676421509  | 8.233999696   | -1.567358254 |
| H259 | -4.526931139  | 7.901387841   | 2.267545513  |
| H260 | -4.349282084  | 7.895324082   | -3.096194165 |
| H261 | 1.654929172   | 5.989671358   | -2.328015040 |
| H262 | 2.476837441   | 7.703729742   | -1.013835514 |
| H263 | -0.783764486  | 5.321653671   | -2.745052238 |
| H264 | -7.439089392  | -0.371735525  | -4.219870428 |
| H265 | 3.722746090   | 10.658355980  | -0.996491442 |
| H266 | -4.707736753  | -0.672075578  | -5.020152149 |
| H267 | 1.519426028   | 7.179518947   | -3.621266594 |
| H268 | -4.044616575  | 6.678634694   | 0.187944068  |
| H269 | 2.866051932   | 10.686309577  | 0.559839772  |
| H270 | -1.332927166  | 8.771526303   | -5.742390168 |
| H271 | -4.407835955  | 9.301864301   | -4.107382295 |
| H272 | -3.470700255  | -3.078786465  | -5.495355989 |
| H273 | -4.887969592  | -3.437537337  | -3.216497768 |
| H274 | -8.084137569  | 9.579333207   | 0.477303979  |
| H275 | -4.679777186  | 1.376888963   | -2.977295054 |
| H276 | -0.104249972  | 8.505888885   | -2.281353829 |
| H277 | -0.383760454  | 7.216910760   | -5.089198791 |
| H278 | 0.427423441   | 4.933197509   | -3.958067710 |
| H279 | -2.853747163  | 6.239842613   | -3.667027974 |
| H280 | -1.100969374  | 8.316754849   | 4.475253449  |
| H281 | -1.528012451  | 9.532894572   | 1.505161754  |
| H282 | -1.581932737  | 12.316173893  | 2.308022074  |
| H283 | 0.483307188   | 9.070711080   | 4.174215249  |
| H284 | -4.035433002  | 10.030717107  | 2.512763536  |
| H285 | 7.557945430   | -1.022735241  | -7.249323112 |
| H286 | 7.362426820   | -2.662475820  | -6.599984781 |
| H287 | 9.489063193   | -3.792946544  | -2.794013492 |
| H288 | 8.639338475   | -2.788454225  | -8.602756755 |
| H289 | 7.155690833   | -3.349030823  | -9.006054914 |
| H290 | 4.851215636   | 5.049090156   | 1.914066091  |
| H291 | 4.390541863   | 7.460598513   | 3.706075371  |
| H292 | 4.844865092   | 8.746869397   | -0.330501131 |
| H293 | 3.234513750   | 5.723519042   | 2.302893516  |
| H294 | 5.699473789   | 8.269580166   | 3.149071741  |
| H295 | 6.736678071   | 4.289033079   | -3.738033314 |
| H296 | 5.590572675   | 7.219887682   | 1.037488288  |
| H297 | 4.005388528   | -7.531963511  | 5.244023723  |
| H298 | 6.546282047   | -7.936254311  | 3.574889044  |
| H299 | 5.353860859   | 2.767661686   | -4.735165351 |
| H300 | 3.602308534   | -0.439809982  | 4.850021877  |
| H301 | 3.151120926   | 3.141448199   | -7.521981332 |
| H302 | 0.559178935   | -1.454622699  | -4.741342829 |
| H303 | 2.357865856   | 3.322637732   | -5.956344514 |
| H304 | 2.952045980   | -5.069728518  | 4.871766676  |
| H305 | 4.026318709   | 1.338653515   | -5.281860317 |
| H306 | 3.275853317   | -5.261067053  | 3.149100368  |
| H307 | 4.132800126   | -7.532024109  | 3.470387540  |
| H308 | 5.733302635   | -5.531487936  | 3.663138763  |
| H309 | 5.359488560   | -5.460638107  | 5.397069442  |
| H310 | -2.768002561  | 0.132440436   | -7.744277100 |
| H311 | 4.891726012   | -9.913221920  | 5.102216062  |
| H312 | 4.860189922   | -12.046270898 | 2.902145463  |

|       |              |               |              |
|-------|--------------|---------------|--------------|
| H313  | 1.553022945  | 0.610485872   | -3.733375713 |
| H314  | 5.285864393  | -12.324871176 | 5.775661490  |
| H315  | 3.982261385  | -12.726872772 | 4.868575101  |
| H316  | 4.703797566  | -3.280546071  | 3.220319741  |
| H317  | 0.660771047  | 2.824413114   | -4.321247970 |
| H318  | -1.219566918 | -1.250963536  | -6.462832063 |
| H319  | 8.654613754  | -9.159471312  | -0.535646201 |
| H320  | 8.219385860  | -6.572095091  | -2.503131999 |
| H321  | 7.043913033  | -7.781982331  | 0.859891769  |
| H322  | 8.278925862  | -9.581342112  | -1.988256000 |
| H323  | 7.454709939  | 4.369221883   | -6.483852957 |
| H324  | 6.578686363  | -4.718582443  | 1.086996514  |
| H325  | 2.614764823  | -7.769868721  | 0.276081848  |
| H326  | 5.671937194  | -0.431595956  | -6.131341242 |
| H327  | 4.040963396  | -8.813217517  | -1.254575162 |
| H328  | 5.847043185  | -5.335862712  | -6.564754049 |
| H329  | 4.289782975  | -4.309358955  | -4.851380415 |
| H330  | 6.347491003  | -12.572973492 | 3.701934808  |
| H331  | 4.474142655  | -1.053944287  | 3.464335995  |
| H332  | 8.176721385  | -5.539863237  | 2.652249686  |
| H333  | 7.223134737  | -3.436214046  | 1.685779605  |
| H334  | 8.196275308  | -6.914344461  | 4.582871206  |
| H335  | 2.255822589  | -3.544549742  | 5.845343908  |
| H336  | 5.525592596  | -7.321607743  | -3.480550974 |
| H337  | 6.296073427  | -7.816517363  | -1.966801257 |
| H338  | 3.321154980  | -8.109696053  | -2.709988042 |
| H339  | 3.375060190  | -0.952368407  | -5.534141492 |
| H340  | -1.117548755 | 3.044059294   | -6.080614552 |
| H341  | -2.830333672 | 1.903174941   | -7.545421665 |
| H342  | 2.540134901  | -6.004346571  | 0.426385848  |
| H343  | 8.520015854  | -7.010591670  | 2.287679850  |
| H344  | 7.626577706  | -8.948466811  | 1.689622951  |
| H345  | 2.122474751  | -1.864539183  | 5.986290983  |
| H346  | 8.117089610  | -5.972008281  | -5.550726159 |
| H347  | 7.703550716  | -5.144596305  | -1.619219756 |
| H348  | 3.112501504  | -1.484706386  | -7.220702806 |
| H349  | 5.719794888  | 5.619461848   | -4.329886235 |
| H350  | 5.868491692  | -0.323568516  | 6.452098962  |
| H351  | 6.433812686  | 0.385723097   | 4.920516393  |
| H352  | 11.173769681 | -4.932319384  | -3.960059302 |
| H353  | 10.453300925 | -6.391587158  | -3.785448551 |
| H354  | 11.084945861 | -7.682981125  | 0.556925755  |
| H355  | 9.801831748  | -7.128038551  | -1.245178358 |
| H356  | 12.967068752 | -6.203051768  | -0.755758016 |
| H357  | 10.614928667 | -6.112676908  | 1.240007686  |
| H358  | 9.032596605  | 0.261254418   | 5.773894241  |
| H359  | -5.452984514 | 12.153874347  | 4.559320803  |
| H360  | 8.407878150  | -7.418950022  | 7.543851021  |
| H361  | 8.032611364  | -4.833484766  | 6.650911437  |
| H362  | -6.236004725 | 11.638989263  | 1.690597730  |
| H363  | -6.164060294 | 9.249716459   | 3.637212519  |
| H364  | -7.619411089 | 9.924308768   | 2.883841714  |
| H365  | 1.703363123  | -3.070381352  | -0.949192314 |
| H366  | -6.348087351 | 6.648050866   | -2.537798986 |
| H367  | 0.233408452  | -0.783204572  | -0.171298397 |
| H368  | 1.968165190  | -1.935241217  | 0.373955475  |
| H369  | -1.641123492 | -0.176987469  | -1.467018488 |
| Mo370 | 4.711680380  | -3.737150800  | -1.602789801 |
| N371  | -5.998615378 | -7.349220052  | -3.970023404 |
| N372  | -8.419837519 | -5.246959728  | -2.043807429 |
| N373  | -8.529334409 | -5.925123218  | 0.682531465  |
| N374  | -5.896593205 | -6.620435149  | 1.423100382  |
| N375  | -4.624222951 | -4.086244198  | 1.321932565  |
| N376  | -5.985999323 | -2.768751787  | 3.473454568  |
| N377  | -5.590383059 | -4.470657744  | 5.789274512  |
| N378  | -2.890613649 | -5.497868850  | 5.791396002  |
| N379  | -1.084602556 | -3.547409173  | 4.781718980  |
| N380  | -1.793480680 | -0.867636541  | 5.878059065  |
| N381  | -3.048145258 | -1.552506439  | 8.467602469  |
| N382  | 4.699283350  | -12.011579026 | 4.999025615  |
| N383  | 5.561925737  | -9.541472587  | 4.420877698  |
| N384  | 4.052767410  | -3.510604084  | 3.973303242  |
| N385  | 2.743792096  | -2.649230338  | 5.733410979  |
| N386  | 3.813367699  | -1.227008573  | 4.242018354  |
| N387  | 7.916480532  | -7.212756726  | 5.543353483  |
| N388  | -4.335867626 | -2.631071833  | -5.140077664 |
| N389  | -0.296271078 | -5.021982996  | -4.497014183 |
| N390  | -5.049145504 | -0.344181846  | -4.099496328 |
| N391  | -7.706171902 | 0.381710260   | -3.589736955 |
| N392  | -8.068861158 | -0.369969968  | -0.901889554 |
| N393  | -6.383437262 | 1.357557441   | 0.527351101  |
| N394  | -3.006829073 | 2.632903549   | -1.698716587 |

|      |               |               |               |
|------|---------------|---------------|---------------|
| N395 | -2.251984748  | 0.640209546   | -1.370544347  |
| N396 | -7.484207443  | 3.792895347   | 1.262332854   |
| N397 | -10.614702092 | 6.811828927   | -0.648637600  |
| N398 | -11.089588774 | 8.351758762   | 0.875554482   |
| N399 | 7.735202031   | 2.494214682   | 6.014851847   |
| N400 | 5.202922329   | 7.376379813   | 3.086793691   |
| N401 | 3.984774831   | 8.952810270   | 0.171079956   |
| N402 | 1.710491837   | 8.333413913   | -1.275483537  |
| N403 | -2.247906708  | 6.926669302   | -4.149151442  |
| N404 | -2.139300885  | 9.026469271   | -5.184551721  |
| N405 | -3.856278309  | 8.543422533   | -3.715439898  |
| N406 | 0.245623800   | 6.430451313   | 0.308669889   |
| N407 | -0.290836048  | 7.974421964   | 2.575694095   |
| N408 | -1.722553501  | 10.279144531  | 2.172214853   |
| N409 | -1.908519690  | 10.445135471  | -1.728189419  |
| N410 | -4.418763411  | 10.973111530  | 2.510675878   |
| N411 | 7.667997758   | -2.501943330  | -8.743744853  |
| N412 | 5.066449184   | -0.954096720  | -6.771421468  |
| N413 | 3.598697439   | 1.630742544   | -6.177357624  |
| N414 | 5.312580177   | 3.707156115   | -5.138987653  |
| N415 | 1.931481917   | -1.151819747  | -10.295580599 |
| N416 | -0.248755555  | 0.260651694   | -9.094479255  |
| N417 | 10.260321737  | -5.390667961  | -3.890851384  |
| N418 | 5.925877312   | -4.599271534  | -3.473833459  |
| N419 | 6.111515164   | -5.158443689  | -5.599201275  |
| N420 | 10.358831544  | -6.360176367  | -0.862896208  |
| N421 | -0.510090718  | 2.596362526   | 0.389288929   |
| N422 | 0.383150947   | 2.084551766   | -0.032584441  |
| O423 | -6.234312317  | -5.710894835  | -1.610379942  |
| O424 | -7.756821717  | -3.850104148  | 1.221372026   |
| O425 | -6.480505922  | -6.319056430  | 3.608794132   |
| O426 | -3.229996866  | -4.837716335  | 2.955180052   |
| O427 | -4.098674761  | -1.517873521  | 3.729154142   |
| O428 | -5.394714970  | -2.512910244  | 6.956003240   |
| O429 | -3.038142990  | -5.650216190  | 8.077181282   |
| O430 | 0.643428026   | -4.648667038  | 5.827221228   |
| O431 | 0.460556194   | -0.903722823  | 6.255894850   |
| O432 | -1.553682023  | -0.049320263  | 9.281251359   |
| O433 | -2.014922200  | -2.363562791  | 11.799144624  |
| O434 | 6.957489355   | -10.265309774 | 2.726079790   |
| O435 | 6.329295517   | -8.240552645  | 6.849265060   |
| O436 | 9.866752546   | -4.945712661  | 7.538654331   |
| O437 | -5.325123624  | -1.161853271  | -1.970517810  |
| O438 | -1.806455647  | -3.784433575  | -5.664591245  |
| O439 | -6.954923213  | 2.161922422   | -2.369114904  |
| O440 | -5.281309257  | 3.292078427   | -4.703162535  |
| O441 | -10.159387352 | 0.577829367   | -0.918507819  |
| O442 | -6.953070475  | 0.368917449   | 2.506463030   |
| O443 | -5.870785208  | 4.074388773   | 2.855558421   |
| O444 | -8.8987111950 | 5.757787616   | 3.849326968   |
| O445 | 8.653442064   | -0.492265156  | 7.633306661   |
| O446 | 1.481542928   | 3.966311347   | 5.653564646   |
| O447 | 2.680881545   | 8.482279744   | 1.978762853   |
| O448 | 0.984029796   | 10.510331127  | -1.228129399  |
| O449 | -1.620201089  | 7.248308934   | -0.733658518  |
| O450 | -2.182549860  | 6.724967995   | 2.940663397   |
| O451 | 1.057823787   | 5.485591105   | 3.233572493   |
| O452 | -1.216819703  | 11.062698353  | 4.265383171   |
| O453 | -4.019384008  | 13.117118191  | 1.848994310   |
| O454 | -3.866766455  | 10.912367480  | -0.647822277  |
| O455 | -7.349419703  | 12.531613873  | 3.900924947   |
| O456 | -5.539454809  | 6.675998142   | -1.990230838  |
| O457 | 4.951878281   | -2.739884528  | -8.212881410  |
| O458 | 2.536332421   | 0.846457242   | -8.048418208  |
| O459 | 4.245822539   | 5.218191632   | -6.467653746  |
| O460 | 8.052248828   | 6.045024816   | -5.485603912  |
| O461 | -1.600843717  | -1.211024454  | -10.190439392 |
| O462 | 1.279996537   | -5.469579069  | -7.058222914  |
| O463 | 3.231531335   | -4.389368358  | -7.035983448  |
| O464 | -1.297729814  | 3.636576092   | -8.646591089  |
| O465 | 11.077483043  | -4.211604939  | -0.918157567  |
| O466 | 13.221008050  | -5.876921660  | 1.243001530   |
| O467 | 1.288363718   | -5.959681617  | -2.140494026  |
| O468 | 0.262642729   | -7.374534551  | -0.726211019  |
| O469 | 6.969552534   | -9.920721713  | -3.102709392  |
| O470 | 4.879278749   | -9.996261211  | -3.965472477  |
| O471 | 5.733671872   | -5.315490543  | -0.452729096  |
| O472 | 5.399115311   | -7.273037431  | 0.599939091   |
| O473 | 3.672251760   | -5.548287909  | -2.025299354  |
| O474 | 8.712913727   | -6.308878501  | 2.969051212   |
| O475 | 6.941621055   | -4.338374252  | 1.927279417   |
| O476 | -3.880006977  | 4.886672342   | -2.970766677  |



|                                                                                    |                                   |               |               |              |
|------------------------------------------------------------------------------------|-----------------------------------|---------------|---------------|--------------|
|                                                                                    | O477                              | 9.063158468   | -9.481542443  | -1.370066603 |
|                                                                                    | O478                              | 7.912397478   | -8.197448567  | 1.110434665  |
|                                                                                    | S479                              | 3.483652882   | 5.389358023   | -0.088177199 |
|                                                                                    | S480                              | 2.779212949   | 2.517039061   | -2.100563140 |
|                                                                                    | S481                              | 3.200207028   | -2.598454496  | -3.048208732 |
|                                                                                    | S482                              | 2.987351696   | 1.786287002   | 1.481395666  |
|                                                                                    | S483                              | 0.919632685   | -0.639877973  | -1.342710293 |
|                                                                                    | S484                              | 5.554476309   | 0.425002924   | -3.776943730 |
|                                                                                    | S485                              | 3.730870165   | -3.308946431  | 0.497887927  |
|                                                                                    | S486                              | 5.966953048   | 2.481752706   | -0.399850722 |
|                                                                                    | S487                              | 6.531290316   | -2.224925056  | -1.516961216 |
|                                                                                    | S488                              | 5.980594281   | -0.607551780  | 1.828733478  |
|                                                                                    | end                               |               |               |              |
| <b>Fe6-H2n</b><br><b>2N2 associated</b><br><b>35, S=1</b>                          |                                   |               |               |              |
| <b>Fe( 139) -2.484</b>                                                             |                                   |               |               |              |
| <b>Fe( 140) -1.033</b>                                                             |                                   |               |               |              |
| <b>Fe( 141) -2.603</b>                                                             |                                   |               |               |              |
| <b>Fe( 142) 2.706</b>                                                              |                                   |               |               |              |
| <b>Fe( 143) 2.719</b>                                                              |                                   |               |               |              |
| <b>Fe( 144) 2.271</b>                                                              |                                   |               |               |              |
| <b>Fe( 145) 0.118</b>                                                              |                                   |               |               |              |
| 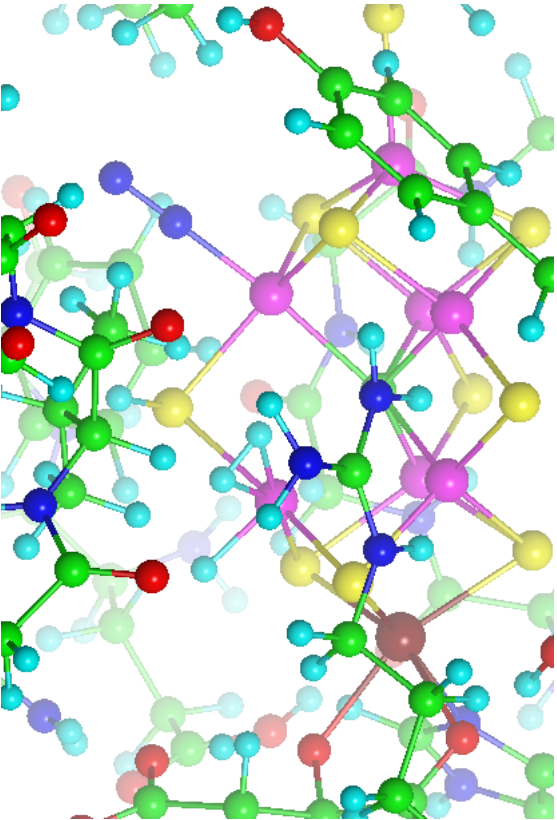 |                                   |               |               |              |
|                                                                                    | <b>bm522bh6x6h2n2n2xdtb.car 4</b> |               |               |              |
|                                                                                    | C1                                | -2.353456707  | -8.247926030  | -4.421180410 |
|                                                                                    | C2                                | -1.648248450  | -8.840743226  | -5.645252934 |
|                                                                                    | C3                                | -4.516748946  | -7.708915205  | -3.391374455 |
|                                                                                    | C4                                | -4.292729627  | -8.225113548  | -1.974036451 |
|                                                                                    | C5                                | -3.596264044  | -10.079152232 | -0.541074519 |
|                                                                                    | C6                                | -2.453422339  | -9.385170012  | 0.202062727  |
|                                                                                    | C7                                | -0.397234292  | -8.083663678  | 0.063950815  |
|                                                                                    | C8                                | -0.890799454  | -6.746783993  | 0.617332682  |
|                                                                                    | C9                                | -2.394339099  | -4.841620609  | 0.310893543  |
|                                                                                    | C10                               | -3.198945934  | -4.996716946  | 1.610045613  |
|                                                                                    | C11                               | -4.784546083  | -6.308491699  | 2.891184075  |
|                                                                                    | C12                               | -3.980914992  | -6.754549488  | 4.119426406  |
|                                                                                    | C13                               | -2.389889622  | -8.379902269  | 5.027269607  |
|                                                                                    | C14                               | -1.060305191  | -7.760108781  | 5.475183085  |
|                                                                                    | C15                               | 1.031133662   | -6.679368145  | 4.762085243  |
|                                                                                    | C16                               | 1.153648360   | -5.155213665  | 4.838544274  |
|                                                                                    | C17                               | 0.195070188   | -2.983285634  | 4.071059103  |
|                                                                                    | C18                               | -0.671044554  | -2.432204048  | 5.226650807  |
|                                                                                    | C19                               | -0.271964953  | -2.504290577  | 2.680221957  |
|                                                                                    | C20                               | -0.452414402  | -0.979986179  | 2.632901081  |
|                                                                                    | C21                               | 0.704446207   | -2.990835481  | 1.605181166  |
|                                                                                    | C22                               | -2.935864253  | -2.316450278  | 6.217271113  |
|                                                                                    | C23                               | -2.929173123  | -3.175350263  | 7.497782751  |
|                                                                                    | C24                               | -4.351255938  | -2.185397482  | 5.601422994  |
|                                                                                    | C25                               | -5.385725918  | -1.802921945  | 6.666799504  |
|                                                                                    | C26                               | -4.358096357  | -1.161511312  | 4.458356221  |
|                                                                                    | C27                               | -3.216203332  | -5.348852253  | 8.541294856  |
|                                                                                    | C28                               | -2.120185997  | -5.101685118  | 9.557679093  |
|                                                                                    | C29                               | 10.403910442  | -7.767396702  | 4.131267253  |
|                                                                                    | C30                               | 10.142444585  | -6.261067675  | 4.199128153  |
|                                                                                    | C31                               | 8.582858796   | -4.562120120  | 5.153962018  |
|                                                                                    | C32                               | 8.904150638   | -4.169535512  | 6.609151654  |
|                                                                                    | C33                               | 7.074295612   | -4.467766253  | 4.866986621  |
|                                                                                    | C34                               | 6.503171642   | -3.064348117  | 5.085360909  |
|                                                                                    | C35                               | 5.077410405   | -2.946653712  | 4.547253325  |
|                                                                                    | C36                               | 3.467548227   | -1.110742837  | 5.188870575  |
|                                                                                    | C37                               | 9.925627499   | -2.477646413  | 8.058039767  |
|                                                                                    | C38                               | 9.139598133   | -1.259595108  | 8.490089227  |
|                                                                                    | C39                               | -1.517487940  | -3.719270906  | -4.818365492 |
|                                                                                    | C40                               | -2.837051060  | -3.060911130  | -4.373364477 |
|                                                                                    | C41                               | -0.380895177  | -3.149992540  | -3.935420396 |
|                                                                                    | C42                               | 0.966759812   | -3.897226492  | -4.010342776 |
|                                                                                    | C43                               | 1.930252790   | -3.402764002  | -5.088256511 |
|                                                                                    | C44                               | -4.333096643  | -1.167102813  | -4.895378647 |
|                                                                                    | C45                               | -5.697514623  | -1.819320907  | -4.632939768 |
|                                                                                    | C46                               | -4.401117495  | -0.087826768  | -5.985804828 |
|                                                                                    | C47                               | -7.173325680  | -3.723806984  | -5.090490053 |
|                                                                                    | C48                               | -7.380048355  | -4.249924571  | -3.666105921 |
|                                                                                    | C49                               | -6.386619048  | -4.663057683  | -1.459642676 |
|                                                                                    | C50                               | -6.254524873  | -3.523400073  | -0.450520412 |
|                                                                                    | C51                               | -6.027370395  | -1.127688871  | -0.024882741 |
|                                                                                    | C52                               | -7.411065020  | -0.726392833  | 0.541456697  |
|                                                                                    | C53                               | -5.466557239  | 0.136322026   | -0.695102160 |
|                                                                                    | C54                               | -4.084407045  | 0.044994941   | -1.250675034 |
|                                                                                    | C55                               | -3.043183807  | -0.830083045  | -1.071882592 |
|                                                                                    | C56                               | -2.365122774  | 0.742215338   | -2.498841637 |
|                                                                                    | C57                               | -9.795448455  | -0.458987201  | -0.039745920 |
|                                                                                    | C58                               | -10.330006710 | -1.103987993  | 1.238350477  |
|                                                                                    | C59                               | -10.675395824 | -0.827500863  | -1.255186813 |
|                                                                                    | C60                               | -11.945009179 | -0.046682692  | -1.421351926 |
|                                                                                    | C61                               | -12.852715165 | 0.418213693   | -0.489789722 |
|                                                                                    | C62                               | -13.496466630 | 0.970093708   | -2.536831899 |
|                                                                                    | C63                               | 4.178996405   | 3.553377998   | 8.329368178  |
|                                                                                    | C64                               | 5.664149076   | 3.310465733   | 8.523820780  |
|                                                                                    | C65                               | 3.692987475   | 2.542947678   | 7.257788000  |
|                                                                                    | C66                               | 2.212519729   | 2.652387563   | 6.977478817  |
|                                                                                    | C67                               | 1.273275203   | 1.914769214   | 7.721274220  |

|       |               |              |              |
|-------|---------------|--------------|--------------|
| C68   | 1.728728241   | 3.500168136  | 5.964155355  |
| C69   | -0.098201487  | 2.007767903  | 7.459577380  |
| C70   | 0.363041889   | 3.616591974  | 5.704137270  |
| C71   | -0.549155485  | 2.862376023  | 6.447345926  |
| C72   | -0.335183330  | 8.091326879  | 3.305484834  |
| C73   | -1.702066194  | 8.534486611  | 2.754833616  |
| C74   | -0.079341915  | 6.622529621  | 2.977175641  |
| C75   | -2.893420158  | 10.056968818 | 1.221907085  |
| C76   | -3.626196320  | 9.178334089  | 0.205694957  |
| C77   | -3.531372788  | 7.044497383  | -1.071012796 |
| C78   | -4.110996524  | 5.864659471  | -0.247244352 |
| C79   | -2.410081199  | 6.583788622  | -2.031473030 |
| C80   | -2.685523521  | 5.427452310  | -2.999176958 |
| C81   | -3.540509280  | 5.743217780  | -4.237687260 |
| C82   | -5.996711554  | 6.215715807  | -4.317549343 |
| C83   | -3.872963318  | 4.310366479  | 1.628139003  |
| C84   | -5.068860170  | 4.696157326  | 2.511298036  |
| C85   | -2.789013951  | 3.706160713  | 2.546673341  |
| C86   | -5.872354128  | 6.360501107  | 4.116587033  |
| C87   | -7.093286903  | 7.193319964  | 3.763824526  |
| C88   | -8.400191772  | 8.213014985  | 1.983042455  |
| C89   | -9.865116772  | 7.708163454  | 1.938469090  |
| C90   | -8.032507511  | 8.898560709  | 0.663222382  |
| C91   | -8.079109220  | 7.969316714  | -0.540572269 |
| C92   | -11.359372128 | 5.756310995  | 1.918586181  |
| C93   | -12.338666537 | 6.057257238  | 3.043992686  |
| C94   | -11.168466740 | 4.218934628  | 1.780979130  |
| C95   | -10.310100986 | 3.842220566  | 0.593208197  |
| C96   | -10.887509450 | 3.658162126  | -0.671417465 |
| C97   | -8.915814979  | 3.713689036  | 0.705931340  |
| C98   | -10.104987254 | 3.371555775  | -1.792467190 |
| C99   | -8.112422298  | 3.456089941  | -0.409254118 |
| C100  | -8.718799817  | 3.293055614  | -1.651277845 |
| C101  | 8.181520128   | 3.447020693  | -5.621749800 |
| C102  | 6.899675133   | 2.744841923  | -6.031558885 |
| C103  | 4.479308926   | 2.512684201  | -5.524620238 |
| C104  | 3.419864676   | 3.538871571  | -5.948596609 |
| C105  | 2.116093616   | 5.485184338  | -5.210477143 |
| C106  | 2.343911517   | 6.802250897  | -4.471808542 |
| C107  | 3.327771910   | 8.027492460  | -2.608655512 |
| C108  | 4.169832153   | 9.094838503  | -3.281732911 |
| C109  | 3.233912752   | 0.727800697  | -9.545544239 |
| C110  | 1.709836310   | 0.874105348  | -9.632382380 |
| C111  | 3.603898765   | -0.210197126 | -8.374245916 |
| C112  | 5.063781516   | -0.689762138 | -8.483321027 |
| C113  | 5.488069611   | -1.385193962 | -7.210070276 |
| C114  | -0.292671932  | 2.050418966  | -8.866502749 |
| C115  | -0.602776329  | 3.533897146  | -8.860797921 |
| C116  | -1.096755423  | 1.219498547  | -7.836499959 |
| C117  | -0.508082390  | 1.357127838  | -6.460358864 |
| C118  | -0.836685236  | 2.450963058  | -5.642952612 |
| C119  | 0.501735787   | 0.472697794  | -6.041109109 |
| C120  | -0.111080925  | 2.699335655  | -4.473003636 |
| C121  | 1.229600113   | 0.724692278  | -4.875432246 |
| C122  | 0.944513236   | 1.858418857  | -4.108534452 |
| C123  | 10.967035874  | 1.415377849  | -0.664796994 |
| C124  | 11.538136883  | 1.393170151  | 0.761845539  |
| C125  | 10.107085641  | 0.168764715  | -0.921792350 |
| C126  | 9.311835373   | 0.149231400  | -2.188690413 |
| C127  | 9.793859005   | 0.175047405  | -3.480929346 |
| C128  | 7.617358365   | -0.223312191 | -3.527091652 |
| C129  | 12.633501362  | 0.185653566  | 2.553028613  |
| C130  | 13.611820722  | 1.299444652  | 2.851065778  |
| C131  | 4.929924532   | -4.778936669 | -1.200796451 |
| C132  | 5.918919794   | -4.294803318 | -0.143558587 |
| C133  | 7.014689716   | -3.328031210 | -0.680062650 |
| C134  | 8.066304293   | -4.124559404 | -1.503480372 |
| C135  | 9.350419089   | -3.362661098 | -1.843323275 |
| C136  | 10.457320687  | -4.242577567 | -2.467887267 |
| C137  | 7.749179529   | -2.675781557 | 0.501295383  |
| C138  | 3.533096482   | 2.081984991  | 0.155830633  |
| Fe139 | 5.003151012   | 2.031556472  | -1.216936019 |
| Fe140 | 1.368280368   | 2.144509910  | 0.065238910  |
| Fe141 | 3.476610733   | 3.152738365  | 1.830082373  |
| Fe142 | 3.407709993   | 3.879414653  | -0.633857196 |
| Fe143 | 1.464942036   | 4.632075427  | 1.024695510  |
| Fe144 | 5.070777087   | 1.309398720  | 1.214670631  |
| Fe145 | 3.425616925   | -0.183800445 | -0.233447619 |
| H146  | 0.272312410   | -8.716204277 | -4.967321415 |
| H147  | -0.158470504  | -7.471806684 | -5.931719913 |
| H148  | -4.181962332  | -8.705001428 | -5.249326834 |
| H149  | -2.211834266  | -8.557533074 | -6.548595296 |

|      |               |               |               |
|------|---------------|---------------|---------------|
| H150 | -1.734232308  | -9.938811744  | -5.565252822  |
| H151 | -4.313241383  | -6.628124912  | -3.368126181  |
| H152 | -3.738054990  | -10.060250294 | -2.688135323  |
| H153 | -5.576281457  | -7.849730106  | -3.646057796  |
| H154 | -3.334866095  | -11.136471932 | -0.680675336  |
| H155 | -1.549986068  | -8.840284939  | -1.575050996  |
| H156 | -4.477603283  | -10.027279204 | 0.112531652   |
| H157 | -1.626313160  | -4.081481811  | 0.499824898   |
| H158 | -2.095256491  | -6.484853679  | -1.028192193  |
| H159 | 0.387669351   | -7.899554804  | -0.681171846  |
| H160 | -5.297483970  | -5.376870256  | 3.162617461   |
| H161 | -4.079010268  | -6.716543709  | 0.894141051   |
| H162 | 0.045044284   | -8.639376214  | 0.899685393   |
| H163 | -3.050994292  | -4.478028225  | -0.492043873  |
| H164 | -2.976160035  | -8.158615566  | 2.982589817   |
| H165 | -5.539710808  | -7.074249649  | 2.667113535   |
| H166 | 0.756212799   | -4.086885035  | 1.556652914   |
| H167 | 0.402104307   | -2.627669126  | 0.610073774   |
| H168 | 1.721734033   | -2.619199668  | 1.802036344   |
| H169 | -1.256899509  | -2.964339646  | 2.497397289   |
| H170 | -2.191647342  | -9.427643432  | 4.754619175   |
| H171 | -3.651630539  | -1.424194053  | 3.658152255   |
| H172 | -3.294220917  | -4.944610432  | 6.452947395   |
| H173 | -5.463978881  | -2.553651785  | 7.465519645   |
| H174 | 0.509859263   | -0.455534641  | 2.533927616   |
| H175 | -0.947890506  | -0.584020350  | 3.531462949   |
| H176 | 3.674020010   | 3.305250916   | 9.283303330   |
| H177 | -5.362014528  | -1.102630854  | 4.011853903   |
| H178 | -6.377073562  | -1.697918710  | 6.202319684   |
| H179 | -4.096298450  | -0.159815279  | 4.836148608   |
| H180 | -5.125342188  | -0.839276056  | 7.132894149   |
| H181 | -4.630733740  | -3.170981649  | 5.187084234   |
| H182 | -2.591011409  | -1.326400972  | 6.548367377   |
| H183 | -2.339043064  | -3.347757121  | 4.432934799   |
| H184 | -1.078016116  | -0.698203762  | 1.772228757   |
| H185 | -1.838501999  | 3.652230942   | 1.993292313   |
| H186 | -3.108621870  | 2.681981855   | 2.791869636   |
| H187 | -2.423121835  | 3.875713956   | 4.476576519   |
| H188 | -2.422473420  | 2.423210101   | 6.708806745   |
| H189 | 0.005874238   | 4.261310383   | 4.901671059   |
| H190 | 2.435459739   | 4.059549196   | 5.346887676   |
| H191 | 1.615217675   | 1.242445369   | 8.512027873   |
| H192 | -0.435154234  | -4.964038401  | 3.569343260   |
| H193 | 1.728551228   | -7.022933524  | 3.982564771   |
| H194 | 1.372706753   | -7.075356286  | 5.725818979   |
| H195 | -0.609383100  | -7.228720314  | 3.520910141   |
| H196 | -3.048640724  | -8.373632061  | 5.905059265   |
| H197 | -0.809155586  | 1.403928690   | 8.029212689   |
| H198 | 1.211112427   | -2.618554328  | 4.257469190   |
| H199 | -4.195210799  | -5.212198835  | 9.029765218   |
| H200 | -3.130676275  | -6.400412933  | 8.224172520   |
| H201 | -1.143075315  | -4.778249482  | 9.129710574   |
| H202 | 11.002007363  | -2.250445399  | 8.093102860   |
| H203 | 3.925222848   | -3.185694304  | -5.489374286  |
| H204 | 5.314194204   | -3.051750243  | -1.971180055  |
| H205 | 5.149131995   | -1.407556937  | -9.312022003  |
| H206 | 5.729563866   | 0.160224853   | -8.692219388  |
| H207 | 2.939679855   | -1.088551656  | -8.364872721  |
| H208 | 0.190945067   | 4.170155274   | -9.317786068  |
| H209 | 3.497391807   | 0.205749808   | -10.478494107 |
| H210 | -0.230739983  | -2.089811471  | -4.203173875  |
| H211 | 0.792467644   | -4.970742696  | -4.200465475  |
| H212 | 1.727077502   | 2.399459060   | -8.223806635  |
| H213 | -0.621206219  | 1.715200579   | -9.873216687  |
| H214 | 3.837411868   | 2.519292828   | -8.679702289  |
| H215 | 3.583072905   | -3.746982895  | -3.857511859  |
| H216 | 3.437580615   | 0.320153620   | -7.423339505  |
| H217 | 4.898098530   | 1.905516638   | -9.781540542  |
| H218 | -1.580321493  | -4.263595244  | -6.808395379  |
| H219 | -0.728789334  | -3.188264039  | -2.891873390  |
| H220 | 6.374555009   | 0.283928297   | -6.665015329  |
| H221 | 1.463692639   | -3.845215355  | -3.030331088  |
| H222 | -5.415878251  | -1.414862625  | 0.842965532   |
| H223 | -2.960852524  | -1.724555420  | -0.469211377  |
| H224 | -7.376909894  | -5.114024981  | -1.304010619  |
| H225 | -5.369006228  | -3.983007574  | -3.206434139  |
| H226 | -8.281364230  | -1.475825109  | -1.159324326  |
| H227 | -12.881916103 | 0.365220495   | 0.593034190   |
| H228 | -9.979677817  | -2.152564152  | 1.396098665   |
| H229 | -10.879069303 | -1.913871306  | -1.237902289  |
| H230 | -9.776026908  | 0.633149199   | 0.103329911   |
| H231 | -14.104751735 | 1.402362411   | -3.327202376  |

|      |               |              |              |
|------|---------------|--------------|--------------|
| H232 | -5.499897607  | 0.941822907  | 0.057108671  |
| H233 | -6.141600320  | 0.433671357  | -1.512400369 |
| H234 | -14.649719232 | 1.525113254  | -0.835268871 |
| H235 | -10.075859513 | -0.643410666 | -2.161099056 |
| H236 | -6.118939059  | -2.086079686 | -1.954474367 |
| H237 | -5.642970781  | -5.431301586 | -1.201265625 |
| H238 | -8.056598040  | -3.114246504 | -5.325535120 |
| H239 | -1.740712979  | 1.319371502  | -3.177188464 |
| H240 | -7.167888981  | -4.581586675 | -5.774988480 |
| H241 | 4.111774815   | 5.575896846  | 8.660251103  |
| H242 | 3.006149673   | 5.051554411  | 7.576435307  |
| H243 | -2.401640352  | 5.738261493  | 0.954864264  |
| H244 | -4.229419885  | 3.517121559  | 0.955509459  |
| H245 | -4.190298180  | 6.518450792  | 2.849484405  |
| H246 | -4.241692363  | 1.759062068  | -2.556382929 |
| H247 | -5.411623129  | 2.058041448  | -4.266578615 |
| H248 | -5.589354671  | 1.414216293  | -6.410873162 |
| H249 | -6.307898298  | 2.639297461  | -3.087725970 |
| H250 | -3.393459867  | 0.342566507  | -6.109283109 |
| H251 | -4.712977548  | -0.540579483 | -6.939921034 |
| H252 | -7.054404866  | 9.389112599  | 0.762677994  |
| H253 | -8.784133987  | 9.684385038  | 0.492981848  |
| H254 | -6.178246257  | 8.569850234  | -1.091132342 |
| H255 | -6.963468889  | 7.353505095  | -2.096844612 |
| H256 | -6.602440929  | 8.086004065  | -4.903385947 |
| H257 | -3.178299387  | 5.161769806  | -5.099344559 |
| H258 | -10.574024681 | 3.213827744  | -2.767879943 |
| H259 | -8.423788524  | 3.802441243  | 1.678671840  |
| H260 | -7.381370920  | 4.950248454  | -3.459358689 |
| H261 | -1.548522901  | 6.286758491  | -1.410987679 |
| H262 | -2.033401258  | 7.906791662  | 0.177776136  |
| H263 | -3.106321389  | 4.559971623  | -2.466975733 |
| H264 | -5.227344382  | -3.338379609 | -5.913961300 |
| H265 | -2.647195971  | 11.008635087 | 0.732303370  |
| H266 | -2.678200137  | -2.031470358 | -6.073547184 |
| H267 | -2.084877338  | 7.466186045  | -2.606077342 |
| H268 | -7.027233641  | 3.417813389  | -0.306617122 |
| H269 | -3.614038504  | 10.267278418 | 2.025026615  |
| H270 | -4.950365626  | 7.717308612  | -5.265554072 |
| H271 | -8.040795196  | 6.259776006  | -4.380637726 |
| H272 | -0.264535610  | -3.316570826 | -6.401878130 |
| H273 | -1.624820174  | -4.791380953 | -4.574754145 |
| H274 | -11.971108929 | 3.727150830  | -0.788716273 |
| H275 | -4.083693787  | -0.683660503 | -3.941827913 |
| H276 | -4.372485412  | 7.474007284  | -1.622747892 |
| H277 | -3.425578061  | 6.802600688  | -4.501075353 |
| H278 | -1.703307073  | 5.104712300  | -3.372069023 |
| H279 | -5.162500797  | 4.444649561  | -3.775622148 |
| H280 | -6.222382230  | 5.459239476  | 4.641663076  |
| H281 | -6.747792237  | 6.847397114  | 1.776765555  |
| H282 | -8.430976981  | 9.000585801  | 2.753190908  |
| H283 | -5.273047732  | 6.952842126  | 4.820736931  |
| H284 | -9.235971888  | 5.796232369  | 2.187318907  |
| H285 | 7.956562942   | 4.452896057  | -5.239008631 |
| H286 | 8.577329396   | 2.859615924  | -4.767731450 |
| H287 | 10.325959718  | 2.309322844  | -0.703730769 |
| H288 | 10.025220550  | 3.796598523  | -6.415566126 |
| H289 | 9.187727406   | 2.618373456  | -7.184638831 |
| H290 | 0.899881979   | 6.349777456  | 3.392815380  |
| H291 | -1.065506268  | 7.800346271  | 5.192252817  |
| H292 | -0.781632833  | 9.867919483  | 1.487084662  |
| H293 | -0.856919257  | 5.998670020  | 3.440242659  |
| H294 | -0.358906837  | 9.262865032  | 4.995559107  |
| H295 | 3.823086619   | 7.754767998  | -1.663757699 |
| H296 | 0.457168991   | 8.704006066  | 2.848198231  |
| H297 | 6.545182179   | -5.200985960 | 5.498909750  |
| H298 | 9.123943249   | -3.907351174 | 4.459992786  |
| H299 | 3.660725830   | 5.976679902  | -3.077120970 |
| H300 | 2.355971367   | 0.575585530  | 5.509654065  |
| H301 | 2.109462485   | 5.707382858  | -6.285180794 |
| H302 | 2.023418863   | 0.041078881  | -4.565436264 |
| H303 | 1.095410659   | 5.157242571  | -4.951290938 |
| H304 | 4.393395390   | -3.607178239 | 5.091793589  |
| H305 | 3.434027048   | 4.224470856  | -4.030602117 |
| H306 | 5.051480477   | -3.262353272 | 3.490595362  |
| H307 | 6.928408568   | -4.768977121 | 3.816625798  |
| H308 | 7.129184654   | -2.322926941 | 4.565297475  |
| H309 | 6.506938697   | -2.801785635 | 6.155215190  |
| H310 | -1.079615837  | 0.170118928  | -8.163298895 |
| H311 | 8.593364727   | -6.707800968 | 5.385546550  |
| H312 | 10.124819907  | -8.072270936 | 3.111071666  |
| H313 | 1.524724303   | 2.093987992  | -3.218486940 |

|       |               |              |               |
|-------|---------------|--------------|---------------|
| H314  | 10.137062928  | -8.655701220 | 5.970902319   |
| H315  | 9.441973582   | -9.482090432 | 4.739278000   |
| H316  | 5.110414190   | -0.893726848 | 4.041644990   |
| H317  | -0.340159888  | 3.560856134  | -3.843423866  |
| H318  | 0.737912190   | -0.407159131 | -6.643472654  |
| H319  | 12.210064440  | -3.032360685 | 0.908108825   |
| H320  | 10.762028937  | -0.719686862 | -0.930829286  |
| H321  | 9.900292662   | -2.997421459 | 1.966441441   |
| H322  | 12.364497250  | -3.302540393 | -0.617360189  |
| H323  | 4.777248777   | 8.742335809  | -4.149320813  |
| H324  | 7.838343905   | -0.715016960 | 2.282397751   |
| H325  | 6.370101669   | -5.164561560 | 0.348805017   |
| H326  | 5.890585482   | 3.772266634  | -4.577242394  |
| H327  | 8.327876987   | -5.009551460 | -0.902576984  |
| H328  | 8.738962909   | -0.168046748 | -5.312871774  |
| H329  | 6.638450636   | -0.455263429 | -3.927052213  |
| H330  | 11.495065290  | -7.902222463 | 4.212040199   |
| H331  | 3.638508614   | 0.777152194  | 4.344998429   |
| H332  | 9.303306042   | -0.879758796 | 4.138657036   |
| H333  | 7.528605715   | 0.570234373  | 3.097624185   |
| H334  | 9.752511259   | -2.397527920 | 5.914427406   |
| H335  | 2.831637499   | -2.881554280 | 5.996701162   |
| H336  | 9.124418237   | -2.557554738 | -2.559132795  |
| H337  | 9.762625994   | -2.887422894 | -0.943137812  |
| H338  | 7.589151357   | -4.489103370 | -2.426539814  |
| H339  | 4.186778069   | 2.030075202  | -4.5784986429 |
| H340  | -1.628692092  | 3.134000093  | -5.958781298  |
| H341  | -2.137285009  | 1.575755421  | -7.873859667  |
| H342  | 5.312093674   | -3.762761735 | 0.609865938   |
| H343  | 10.445527623  | -1.863312269 | 3.765166069   |
| H344  | 10.880631356  | -3.824478032 | 2.828509697   |
| H345  | 1.753446026   | -1.589858634 | 6.179250085   |
| H346  | 10.801197756  | 0.304826176  | -3.859198863  |
| H347  | 9.422094791   | 0.026658234  | -0.078861599  |
| H348  | 4.552570156   | 1.757100620  | -6.308531114  |
| H349  | 2.345784375   | 8.458046784  | -2.358413575  |
| H350  | 3.934216852   | 1.532448916  | 7.619238202   |
| H351  | 4.262701953   | 2.714726549  | 6.330356263   |
| H352  | 12.539402138  | 2.436666431  | -1.493992836  |
| H353  | 12.692830028  | 0.812143868  | -1.614747514  |
| H354  | 13.176252309  | -0.766326623 | 2.666351734   |
| H355  | 12.166976376  | -0.604704287 | 0.628070033   |
| H356  | 14.159187735  | 1.694754204  | 1.962672547   |
| H357  | 11.823675226  | 0.192963135  | 3.298832825   |
| H358  | 6.312457502   | 3.827484286  | 7.775332944   |
| H359  | -11.872526252 | 6.381789301  | 4.003351492   |
| H360  | 9.721800618   | -3.274911608 | 8.793623188   |
| H361  | 8.135938198   | -1.146043719 | 8.012153635   |
| H362  | -11.797308554 | 6.149361606  | 0.985603472   |
| H363  | -10.722176749 | 3.832928087  | 2.711494842   |
| H364  | -12.169092187 | 3.772690478  | 1.683948804   |
| H365  | 3.267172073   | -1.639766990 | -0.582576840  |
| H366  | -8.453545519  | 2.759451176  | -3.509386844  |
| H367  | 0.641955131   | -0.505663595 | -0.510680779  |
| H368  | 2.456775732   | -0.075939989 | 1.073672322   |
| H369  | 2.483165047   | -0.906649427 | 0.819444023   |
| H370  | -1.065116276  | -0.778435570 | -1.920309724  |
| Mo371 | 6.214508518   | -0.349394216 | -0.638078641  |
| N372  | -0.250082181  | -8.483869562 | -5.815665919  |
| N373  | -3.714108532  | -8.368471130 | -4.411197685  |
| N374  | -3.885234679  | -9.508352748 | -1.846406666  |
| N375  | -1.457382693  | -8.863505482 | -0.557505283  |
| N376  | -1.780386833  | -6.075152322 | -0.152117475  |
| N377  | -3.972184571  | -6.101776549 | 1.703541241   |
| N378  | -3.072375599  | -7.742328201 | 3.912911989   |
| N379  | -0.294854938  | -7.206511935 | 4.493330305   |
| N380  | 0.241396648   | -4.445340978 | 4.128908178   |
| N381  | -1.980384168  | -2.794922905 | 5.214887776   |
| N382  | -3.070036465  | -4.517761416 | 7.355553456   |
| N383  | 9.616006492   | -8.542214802 | 5.098593992   |
| N384  | 9.050474542   | -5.920221757 | 4.914246205   |
| N385  | 4.588901517   | -1.564651921 | 4.609025724   |
| N386  | 2.740054812   | -1.861978321 | 6.041781796   |
| N387  | 3.051033119   | 0.138780197  | 4.908196783   |
| N388  | 9.534773937   | -2.977470979 | 6.754346474   |
| N389  | -1.277645822  | -3.467928687 | -6.242901307  |
| N390  | 3.238620715   | -3.469620626 | -4.782592705  |
| N391  | -3.286941796  | -2.115462252 | -5.240870306  |
| N392  | -5.954401125  | -2.962491465 | -5.308866261  |
| N393  | -6.282059703  | -4.295800048 | -2.859158846  |
| N394  | -6.088076937  | -2.257108726 | -0.944447884  |
| N395  | -3.629074328  | 1.004927390  | -2.144807543  |

|      |               |              |               |
|------|---------------|--------------|---------------|
| N396 | -2.002230290  | -0.377565445 | -1.859700099  |
| N397 | -8.449904280  | -0.953893536 | -0.302944380  |
| N398 | -12.357826406 | 0.305965982  | -2.696777504  |
| N399 | -13.829525109 | 1.063407830  | -1.218915630  |
| N400 | 3.977763139   | 4.932181505  | 7.876213190   |
| N401 | -0.261105384  | 8.270196399  | 4.764411520   |
| N402 | -1.678614282  | 9.493341497  | 1.783373819   |
| N403 | -2.962659235  | 8.082449504  | -0.218413595  |
| N404 | -4.960176035  | 5.422491350  | -4.050414989  |
| N405 | -5.857575811  | 7.396762446  | -4.947041489  |
| N406 | -7.235789272  | 5.858261845  | -3.906913780  |
| N407 | -3.377962456  | 5.422937132  | 0.813002988   |
| N408 | -5.044414124  | 5.971295281  | 2.990599083   |
| N409 | -7.415377425  | 7.249510935  | 2.434639350   |
| N410 | -7.036368715  | 8.099019553  | -1.406424414  |
| N411 | -10.065581036 | 6.384499472  | 2.160743594   |
| N412 | 9.096396292   | 3.547332869  | -6.762707374  |
| N413 | 5.788874204   | 3.130387039  | -5.369168802  |
| N414 | 3.072852563   | 4.416015546  | -4.981265490  |
| N415 | 3.185977235   | 6.822066234  | -3.407565945  |
| N416 | 3.904068015   | 2.033299467  | -9.582214384  |
| N417 | 1.142088440   | 1.835521082  | -8.848272759  |
| N418 | 12.016064665  | 1.578191882  | -1.687434505  |
| N419 | 7.937962107   | -0.089079011 | -2.238785714  |
| N420 | 8.713661007   | -0.059631478 | -4.302029413  |
| N421 | 12.132485193  | 0.247576683  | 1.191731688   |
| N422 | -1.563657606  | 1.834634390  | 0.221655426   |
| N423 | -0.441099701  | 1.960575561  | 0.164256635   |
| O424 | -1.742741976  | -7.726828799 | -3.472047105  |
| O425 | -4.486063556  | -7.481317879 | -0.994510415  |
| O426 | -2.447311783  | -9.339940752 | 1.443723798   |
| O427 | -0.501507286  | -6.309033709 | 1.713123936   |
| O428 | -3.138055401  | -4.140926378 | 2.508075664   |
| O429 | -4.205114245  | -6.261059130 | 5.237954592   |
| O430 | -0.716199356  | -7.830864030 | 6.661863851   |
| O431 | 2.083759415   | -4.650411269 | 5.491282004   |
| O432 | -0.182489661  | -1.695978629 | 6.104078218   |
| O433 | -2.820276642  | -2.646608175 | 8.616350746   |
| O434 | -2.260858552  | -5.312486635 | 10.753557651  |
| O435 | 10.896072738  | -5.470421034 | 3.595368507   |
| O436 | 8.590863368   | -4.916796832 | 7.552662772   |
| O437 | 9.543131857   | -0.452725242 | 9.312473790   |
| O438 | -3.419737537  | -3.350809230 | -3.309248773  |
| O439 | 1.524374390   | -2.992732122 | -6.201072625  |
| O440 | -6.489258179  | -1.315430598 | -3.817029097  |
| O441 | -5.342674787  | 0.933128350  | -5.600968802  |
| O442 | -8.509653816  | -4.615487073 | -3.316107975  |
| O443 | -6.303674761  | -3.761729587 | 0.761057618   |
| O444 | -7.526389442  | -0.159059427 | 1.630805912   |
| O445 | -11.100789615 | -0.563633880 | 2.012284330   |
| O446 | 6.136443164   | 2.591765586  | 9.392672816   |
| O447 | -1.886805116  | 2.987706078  | 6.122327714   |
| O448 | -2.770922365  | 8.058626291  | 3.175107125   |
| O449 | -4.761018835  | 9.510027585  | -0.189515635  |
| O450 | -5.202746084  | 5.365077433  | -0.564745301  |
| O451 | -5.942705424  | 3.866934304  | 2.797214861   |
| O452 | -2.625913891  | 4.483849624  | 3.736647799   |
| O453 | -7.749912144  | 7.764748072  | 4.642690769   |
| O454 | -10.794300466 | 8.509488830  | 1.765653778   |
| O455 | -9.019343340  | 7.184206583  | -0.729747975  |
| O456 | -13.546635856 | 5.927901241  | 2.925101725   |
| O457 | -7.894065920  | 3.082957052  | -2.776818466  |
| O458 | 6.911954079   | 1.842915775  | -6.904072731  |
| O459 | 2.944462930   | 3.557798799  | -7.102875866  |
| O460 | 1.713964062   | 7.807548105  | -4.838093812  |
| O461 | 4.213809625   | 10.251240714 | -2.896286710  |
| O462 | 1.034439857   | 0.133456773  | -10.365024245 |
| O463 | 5.182989720   | -2.541314944 | -6.939204412  |
| O464 | 6.190105704   | -0.646151651 | -6.325662870  |
| O465 | -1.645948593  | 4.023027005  | -8.451648233  |
| O466 | 11.503672149  | 2.402873102  | 1.491598907   |
| O467 | 13.858625673  | 1.697692935  | 3.981158899   |
| O468 | 4.650837215   | -3.892115341 | -2.163423224  |
| O469 | 4.386088106   | -5.881214251 | -1.148799338  |
| O470 | 11.648383030  | -4.077453833 | -2.026990904  |
| O471 | 10.119087400  | -5.043232562 | -3.384839059  |
| O472 | 7.766782382   | -1.366971968 | 0.526691475   |
| O473 | 8.319634375   | -3.380320291 | 1.353952146   |
| O474 | 6.365558587   | -2.317841134 | -1.453155504  |
| O475 | 10.106319508  | -1.311417715 | 4.522254490   |
| O476 | 7.774043755   | -0.367473100 | 3.206637330   |
| O477 | -5.393227806  | 2.650252402  | -3.466365796  |

|                                                                                    |                                   |               |               |              |
|------------------------------------------------------------------------------------|-----------------------------------|---------------|---------------|--------------|
|                                                                                    | O478                              | 12.853520824  | -2.924591282  | 0.172688485  |
|                                                                                    | O479                              | 10.797874080  | -2.939881017  | 2.390996905  |
|                                                                                    | S480                              | -0.087525432  | 6.295871035   | 1.155302268  |
|                                                                                    | S481                              | 1.214618670   | 4.021056414   | -1.156988447 |
|                                                                                    | S482                              | 4.540380426   | 0.061463403   | -2.235844785 |
|                                                                                    | S483                              | 1.295971048   | 2.796522767   | 2.283506779  |
|                                                                                    | S484                              | 1.444024023   | 0.259774044   | -1.302761298 |
|                                                                                    | S485                              | 4.917813157   | 3.985681477   | -2.257227207 |
|                                                                                    | S486                              | 4.937366497   | -0.920834772  | 1.240729448  |
|                                                                                    | S487                              | 3.649652295   | 5.263810811   | 1.169339391  |
|                                                                                    | S488                              | 6.869010597   | 1.843529302   | 0.008802464  |
|                                                                                    | S489                              | 4.970956902   | 2.255273806   | 3.190326776  |
|                                                                                    | end                               |               |               |              |
| <b>Fe6-H2n</b><br><b>2N2 dissociated</b><br><b>35, S=1</b>                         |                                   |               |               |              |
| <b>Fe (139) -2.601</b>                                                             |                                   |               |               |              |
| <b>Fe (140) -1.032</b>                                                             |                                   |               |               |              |
| <b>Fe (141) -2.385</b>                                                             |                                   |               |               |              |
| <b>Fe (142) 2.667</b>                                                              |                                   |               |               |              |
| <b>Fe (143) 2.789</b>                                                              |                                   |               |               |              |
| <b>Fe (144) 2.207</b>                                                              |                                   |               |               |              |
| <b>Fe (145) 0.145</b>                                                              |                                   |               |               |              |
| 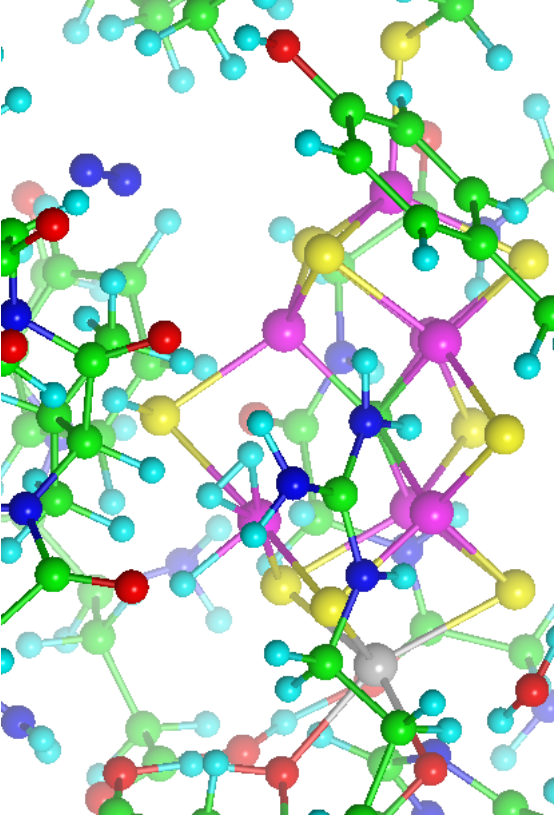 |                                   |               |               |              |
|                                                                                    | <b>bm522bh6x6h2n2n2xdta.car_5</b> |               |               |              |
|                                                                                    | C1                                | -2.346952370  | -8.224161588  | -4.403693820 |
|                                                                                    | C2                                | -1.626776162  | -8.819914642  | -5.619215811 |
|                                                                                    | C3                                | -4.527084179  | -7.719291911  | -3.390554097 |
|                                                                                    | C4                                | -4.307060621  | -8.242767412  | -1.975109795 |
|                                                                                    | C5                                | -3.606635278  | -10.102191925 | -0.551839448 |
|                                                                                    | C6                                | -2.459654435  | -9.412967763  | 0.192413667  |
|                                                                                    | C7                                | -0.396482549  | -8.118492132  | 0.050479158  |
|                                                                                    | C8                                | -0.884195587  | -6.779013666  | 0.604866374  |
|                                                                                    | C9                                | -2.379279714  | -4.866623971  | 0.302357770  |
|                                                                                    | C10                               | -3.179793213  | -5.019776401  | 1.603963284  |
|                                                                                    | C11                               | -4.774098326  | -6.324696341  | 2.880774353  |
|                                                                                    | C12                               | -3.970546975  | -6.767076710  | 4.110445295  |
|                                                                                    | C13                               | -2.377012976  | -8.386242448  | 5.024146500  |
|                                                                                    | C14                               | -1.053139727  | -7.753609849  | 5.470574190  |
|                                                                                    | C15                               | 1.032641570   | -6.666048061  | 4.754234579  |
|                                                                                    | C16                               | 1.153515981   | -5.140859870  | 4.827838311  |
|                                                                                    | C17                               | 0.210318268   | -2.963450968  | 4.048404207  |
|                                                                                    | C18                               | -0.661099355  | -2.409827578  | 5.200542806  |
|                                                                                    | C19                               | -0.245752242  | -2.482812783  | 2.658009474  |
|                                                                                    | C20                               | -0.379174574  | -0.958084147  | 2.629682111  |
|                                                                                    | C21                               | 0.723280324   | -2.996027348  | 1.587905511  |
|                                                                                    | C22                               | -2.923884435  | -2.310946196  | 6.196765401  |
|                                                                                    | C23                               | -2.915427459  | -3.171303011  | 7.476273846  |
|                                                                                    | C24                               | -4.341177986  | -2.182355984  | 5.583615611  |
|                                                                                    | C25                               | -5.375995893  | -1.808886619  | 6.651887181  |
|                                                                                    | C26                               | -4.352624040  | -1.153209986  | 4.446370359  |
|                                                                                    | C27                               | -3.189318253  | -5.348308122  | 8.513997412  |
|                                                                                    | C28                               | -2.097135958  | -5.104813021  | 9.534978761  |
|                                                                                    | C29                               | 10.407682612  | -7.752866441  | 4.122866441  |
|                                                                                    | C30                               | 10.147212721  | -6.247089651  | 4.199097171  |
|                                                                                    | C31                               | 8.584987219   | -4.552099575  | 5.152122444  |
|                                                                                    | C32                               | 8.915239118   | -4.163596593  | 6.605985424  |
|                                                                                    | C33                               | 7.073974839   | -4.454219572  | 4.878260079  |
|                                                                                    | C34                               | 6.504396609   | -3.052686406  | 5.111457068  |
|                                                                                    | C35                               | 5.076667779   | -2.933151441  | 4.577255376  |
|                                                                                    | C36                               | 3.450329325   | -1.107385251  | 5.206703965  |
|                                                                                    | C37                               | 9.929032447   | -2.465751706  | 8.055482928  |
|                                                                                    | C38                               | 9.126226276   | -1.257094615  | 8.485353480  |
|                                                                                    | C39                               | -1.503160425  | -3.693305394  | -4.818760282 |
|                                                                                    | C40                               | -2.828886906  | -3.038197632  | -4.385255907 |
|                                                                                    | C41                               | -0.366808601  | -3.135936114  | -3.933836993 |
|                                                                                    | C42                               | 0.974431908   | -3.894125377  | -4.012890433 |
|                                                                                    | C43                               | 1.945366662   | -3.392824821  | -5.081166429 |
|                                                                                    | C44                               | -4.335686742  | -1.160656161  | -4.923645755 |
|                                                                                    | C45                               | -5.696825911  | -1.811314398  | -4.646105927 |
|                                                                                    | C46                               | -4.410098557  | -0.085224992  | -6.016665364 |
|                                                                                    | C47                               | -7.188698156  | -3.704937347  | -5.088351895 |
|                                                                                    | C48                               | -7.385339282  | -4.240824925  | -3.665865091 |
|                                                                                    | C49                               | -6.376390543  | -4.663478321  | -1.468324735 |
|                                                                                    | C50                               | -6.246054237  | -3.523350600  | -0.460815086 |
|                                                                                    | C51                               | -6.014433718  | -1.129016774  | -0.041525724 |
|                                                                                    | C52                               | -7.387814028  | -0.712268230  | 0.536186042  |
|                                                                                    | C53                               | -5.452931903  | 0.120000750   | -0.735034849 |
|                                                                                    | C54                               | -4.083049231  | 0.004337689   | -1.317149494 |
|                                                                                    | C55                               | -3.045682312  | -0.879477167  | -1.144979621 |
|                                                                                    | C56                               | -2.361105920  | 0.700725966   | -2.559394615 |
|                                                                                    | C57                               | -9.773732860  | -0.435758911  | -0.026053314 |
|                                                                                    | C58                               | -10.307072242 | -1.067004086  | 1.259077489  |
|                                                                                    | C59                               | -10.666122570 | -0.809686966  | -1.233362034 |
|                                                                                    | C60                               | -11.939044772 | -0.032022335  | -1.398537048 |
|                                                                                    | C61                               | -12.844703654 | 0.437099288   | -0.466867701 |
|                                                                                    | C62                               | -13.500000847 | 0.968546696   | -2.515249355 |
|                                                                                    | C63                               | 4.189331964   | 3.561703872   | 8.325067472  |
|                                                                                    | C64                               | 5.676158551   | 3.324617133   | 8.512408978  |
|                                                                                    | C65                               | 3.706279768   | 2.553913004   | 7.248993171  |
|                                                                                    | C66                               | 2.226313716   | 2.659035047   | 6.967142690  |
|                                                                                    | C67                               | 1.287997721   | 1.923987436   | 7.714762073  |

|       |               |              |              |
|-------|---------------|--------------|--------------|
| C68   | 1.742058465   | 3.496546695  | 5.945782322  |
| C69   | -0.083411190  | 2.011658298  | 7.450021512  |
| C70   | 0.376677724   | 3.606058484  | 5.680599979  |
| C71   | -0.534730491  | 2.857198939  | 6.430275949  |
| C72   | -0.339693912  | 8.105183992  | 3.289738491  |
| C73   | -1.711329039  | 8.550787278  | 2.753525411  |
| C74   | -0.089362782  | 6.632136779  | 2.970810117  |
| C75   | -2.911511019  | 10.058899143 | 1.211986402  |
| C76   | -3.636401693  | 9.184477351  | 0.185666817  |
| C77   | -3.541819999  | 7.029760639  | -1.063005473 |
| C78   | -4.102478618  | 5.845933871  | -0.231679675 |
| C79   | -2.417498619  | 6.585070233  | -2.029447548 |
| C80   | -2.679045991  | 5.425518534  | -2.997552387 |
| C81   | -3.536460740  | 5.732381531  | -4.235980994 |
| C82   | -5.986925660  | 6.216216101  | -4.325548216 |
| C83   | -3.853753218  | 4.330951663  | 1.672091202  |
| C84   | -5.060734260  | 4.703735298  | 2.542136068  |
| C85   | -2.764653059  | 3.764447008  | 2.611065986  |
| C86   | -5.884934371  | 6.355169909  | 4.145676551  |
| C87   | -7.103834053  | 7.188690293  | 3.786869566  |
| C88   | -8.387902223  | 8.216041591  | 1.994757523  |
| C89   | -9.851105676  | 7.708514870  | 1.946728521  |
| C90   | -8.009504983  | 8.898547107  | 0.678799949  |
| C91   | -8.066982855  | 7.978978195  | -0.532212210 |
| C92   | -11.343546344 | 5.756649237  | 1.918309083  |
| C93   | -12.326267057 | 6.061123015  | 3.040103974  |
| C94   | -11.158097109 | 4.219144672  | 1.781579709  |
| C95   | -10.297675248 | 3.844975910  | 0.595302061  |
| C96   | -10.871228453 | 3.665735938  | -0.672068464 |
| C97   | -8.904873546  | 3.710816475  | 0.712945619  |
| C98   | -10.084542084 | 3.381600970  | -1.791320728 |
| C99   | -8.096899017  | 3.456720439  | -0.399391116 |
| C100  | -8.698684166  | 3.300608479  | -1.644015955 |
| C101  | 8.202586749   | 3.442397115  | -5.637761055 |
| C102  | 6.912534786   | 2.743013154  | -6.030386837 |
| C103  | 4.495640768   | 2.513758635  | -5.499438001 |
| C104  | 3.439780186   | 3.541563505  | -5.925994314 |
| C105  | 2.129705390   | 5.483615750  | -5.193079803 |
| C106  | 2.367993981   | 6.808821737  | -4.473159830 |
| C107  | 3.358533020   | 8.050167614  | -2.626560390 |
| C108  | 4.147993041   | 9.138186893  | -3.329241879 |
| C109  | 3.247175480   | 0.742002500  | -9.551990362 |
| C110  | 1.723292625   | 0.885798782  | -9.641463581 |
| C111  | 3.613131633   | -0.198050594 | -8.380707927 |
| C112  | 5.071409289   | -0.681719903 | -8.482172375 |
| C113  | 5.484792834   | -1.382853998 | -7.208183781 |
| C114  | -0.282177602  | 2.053785420  | -8.870239953 |
| C115  | -0.602405457  | 3.535662515  | -8.872707554 |
| C116  | -1.082327720  | 1.220018410  | -7.841053704 |
| C117  | -0.496280972  | 1.353971241  | -6.463649809 |
| C118  | -0.823021129  | 2.448735606  | -5.646747265 |
| C119  | 0.502321834   | 0.459750151  | -6.039021586 |
| C120  | -0.111821257  | 2.680777334  | -4.464874345 |
| C121  | 1.214531207   | 0.694714738  | -4.859428270 |
| C122  | 0.928429316   | 1.824647588  | -4.088743696 |
| C123  | 10.966993256  | 1.403785448  | -0.675165459 |
| C124  | 11.541066339  | 1.387652967  | 0.751552463  |
| C125  | 10.084999869  | 0.170042543  | -0.918242761 |
| C126  | 9.286722855   | 0.151932658  | -2.183486889 |
| C127  | 9.762362668   | 0.177167717  | -3.478149265 |
| C128  | 7.592128616   | -0.253456536 | -3.511259052 |
| C129  | 12.649613182  | 0.181661698  | 2.539917931  |
| C130  | 13.617003648  | 1.302019847  | 2.845142604  |
| C131  | 4.926374807   | -4.809051413 | -1.184891610 |
| C132  | 5.911492159   | -4.316505336 | -0.128173840 |
| C133  | 6.999764740   | -3.341748812 | -0.670759056 |
| C134  | 8.057178952   | -4.131734423 | -1.494411006 |
| C135  | 9.338802373   | -3.363350125 | -1.830337727 |
| C136  | 10.447086223  | -4.236085473 | -2.460360784 |
| C137  | 7.733536272   | -2.675745804 | 0.505574077  |
| C138  | 3.554445423   | 2.108743013  | 0.147370742  |
| Fe139 | 5.029324837   | 2.048655785  | -1.223534892 |
| Fe140 | 1.668590314   | 2.128278621  | 0.030026189  |
| Fe141 | 3.311983468   | 3.071336226  | 1.835386381  |
| Fe142 | 3.442188216   | 3.947244125  | -0.598039807 |
| Fe143 | 1.334261781   | 4.537600038  | 0.977723779  |
| Fe144 | 5.044646824   | 1.281496439  | 1.212668702  |
| Fe145 | 3.373163246   | -0.219261213 | -0.214256411 |
| H146  | 0.282543852   | -8.684741783 | -4.917110426 |
| H147  | -0.132563520  | -7.453441301 | -5.904952740 |
| H148  | -4.161364000  | -8.703571313 | -5.249339675 |
| H149  | -2.180994198  | -8.542714012 | -6.529886841 |



|      |               |               |               |
|------|---------------|---------------|---------------|
| H150 | -1.711928941  | -9.917261346  | -5.534507919  |
| H151 | -4.338316173  | -6.635756006  | -3.359096526  |
| H152 | -3.743005357  | -10.071968032 | -2.698354636  |
| H153 | -5.582346434  | -7.874682391  | -3.655096946  |
| H154 | -3.349691237  | -11.160385541 | -0.694699121  |
| H155 | -1.556011160  | -8.865639462  | -1.583358354  |
| H156 | -4.486372582  | -10.049653562 | 0.104122364   |
| H157 | -1.605953589  | -4.111205139  | 0.488907047   |
| H158 | -2.081659523  | -6.504100372  | -1.046701563  |
| H159 | 0.384871785   | -7.937998154  | -0.700005990  |
| H160 | -5.287635601  | -5.393676699  | 3.150929740   |
| H161 | -4.074434657  | -6.730337072  | 0.881905816   |
| H162 | 0.049789674   | -8.673088484  | 0.884117877   |
| H163 | -3.038948792  | -4.501468118  | -0.497652241  |
| H164 | -2.968450329  | -8.176824288  | 2.978254250   |
| H165 | -5.527794634  | -7.091650334  | 2.658601705   |
| H166 | 0.750254543   | -4.093037602  | 1.547732381   |
| H167 | 0.430515218   | -2.638139833  | 0.588476511   |
| H168 | 1.751503366   | -2.653893158  | 1.781732101   |
| H169 | -1.243589170  | -2.915245118  | 2.468285932   |
| H170 | -2.170057564  | -9.431936370  | 4.751974417   |
| H171 | -3.639325736  | -1.403781978  | 3.648711180   |
| H172 | -3.260333291  | -4.942162637  | 6.426498079   |
| H173 | -5.467881327  | -2.574850040  | 7.434463931   |
| H174 | 0.588418624   | -0.455674903  | 2.775419409   |
| H175 | -1.055349791  | -0.590190094  | 3.415542839   |
| H176 | 3.688390161   | 3.303316893   | 9.277789234   |
| H177 | -5.354344395  | -1.102961529  | 3.994764209   |
| H178 | -6.363198666  | -1.681942427  | 6.184600117   |
| H179 | -4.101397703  | -0.151636066  | 4.830578420   |
| H180 | -5.105796079  | -0.858215513  | 7.138326036   |
| H181 | -4.617191829  | -3.167538183  | 5.165432993   |
| H182 | -2.581826760  | -1.320872703  | 6.530209405   |
| H183 | -2.323344331  | -3.344087191  | 4.415574770   |
| H184 | -0.788585791  | -0.629081800  | 1.662344163   |
| H185 | -1.802862828  | 3.730546790   | 2.072418631   |
| H186 | -3.062664612  | 2.734902656   | 2.863320156   |
| H187 | -2.430242667  | 3.943440494   | 4.540629010   |
| H188 | -2.408870265  | 2.423394823   | 6.705318883   |
| H189 | 0.019336647   | 4.242948644   | 4.871595229   |
| H190 | 2.448608153   | 4.051759219   | 5.325483225   |
| H191 | 1.629427132   | 1.254168727   | 8.508488369   |
| H192 | -0.433073216  | -4.943624075  | 3.553912432   |
| H193 | 1.733107227   | -7.008544048  | 3.977220749   |
| H194 | 1.377476214   | -7.057764447  | 5.718520471   |
| H195 | -0.607603610  | -7.221748910  | 3.514908202   |
| H196 | -3.036444490  | -8.384912107  | 5.901510408   |
| H197 | -0.795053781  | 1.409101734   | 8.021193683   |
| H198 | 1.227476179   | -2.605751029  | 4.240928263   |
| H199 | -4.168340000  | -5.213635717  | 9.001995364   |
| H200 | -3.104397364  | -6.398380364  | 8.194495129   |
| H201 | -1.118895435  | -4.772009072  | 9.117510099   |
| H202 | 11.002239541  | -2.220306644  | 8.087399812   |
| H203 | 3.942904585   | -3.184564438  | -5.472716039  |
| H204 | 5.301171664   | -3.071521517  | -1.945197135  |
| H205 | 5.164224474   | -1.394581764  | -9.314188874  |
| H206 | 5.740689889   | 0.167626535   | -8.679636626  |
| H207 | 2.944650121   | -1.073054184  | -8.373090475  |
| H208 | 0.181896980   | 4.171596492   | -9.345680306  |
| H209 | 3.511949122   | 0.225058789   | -10.486306838 |
| H210 | -0.208023870  | -2.077263267  | -4.200606352  |
| H211 | 0.794618298   | -4.963326940  | -4.220076950  |
| H212 | 1.734650988   | 2.405227479   | -8.226608514  |
| H213 | -0.611527317  | 1.716352115   | -9.876737082  |
| H214 | 3.856487543   | 2.526738071   | -8.677746187  |
| H215 | 3.588835687   | -3.758464211  | -3.847280053  |
| H216 | 3.445353598   | 0.336054767   | -7.432156424  |
| H217 | 4.912195783   | 1.918226081   | -9.785710220  |
| H218 | -1.551609394  | -4.248653025  | -6.806525282  |
| H219 | -0.714385034  | -3.175516982  | -2.890888888  |
| H220 | 6.364917003   | 0.285182290   | -6.654131049  |
| H221 | 1.469356534   | -3.859516390  | -3.031359282  |
| H222 | -5.395393156  | -1.417371586  | 0.819408897   |
| H223 | -2.963906457  | -1.767883226  | -0.532868326  |
| H224 | -7.364327849  | -5.118323675  | -1.308216522  |
| H225 | -5.372297099  | -3.976880606  | -3.222432592  |
| H226 | -8.275953860  | -1.479112933  | -1.144726187  |
| H227 | -12.868275527 | 0.393126302   | 0.616467444   |
| H228 | -9.967007755  | -2.117940406  | 1.424107976   |
| H229 | -10.869831250 | -1.895885609  | -1.207918896  |
| H230 | -9.748100159  | 0.657054709   | 0.109325005   |
| H231 | -14.113487077 | 1.391713009   | -3.305914109  |

|      |               |              |              |
|------|---------------|--------------|--------------|
| H232 | -5.445992724  | 0.931769007  | 0.009782867  |
| H233 | -6.149096933  | 0.425989363  | -1.533170999 |
| H234 | -14.646898166 | 1.533137247  | -0.813762825 |
| H235 | -10.073330106 | -0.633483810 | -2.145594931 |
| H236 | -6.118586513  | -2.083108082 | -1.967119014 |
| H237 | -5.625929233  | -5.426443371 | -1.214399073 |
| H238 | -8.066949361  | -3.081766055 | -5.305425327 |
| H239 | -1.727193157  | 1.290732905  | -3.216381748 |
| H240 | -7.203137300  | -4.556672217 | -5.780226581 |
| H241 | 4.107731491   | 5.581133149  | 8.668735197  |
| H242 | 3.006797472   | 5.056673151  | 7.579659714  |
| H243 | -2.395150926  | 5.759839368  | 0.981432234  |
| H244 | -4.197286379  | 3.521535948  | 1.013017775  |
| H245 | -4.196938442  | 6.531472131  | 2.885260921  |
| H246 | -4.237263594  | 1.731000424  | -2.607763036 |
| H247 | -5.395649895  | 2.056758955  | -4.274045518 |
| H248 | -5.594979366  | 1.425490543  | -6.423043632 |
| H249 | -6.289336150  | 2.638133480  | -3.084014269 |
| H250 | -3.400458544  | 0.335635667  | -6.154162497 |
| H251 | -4.738842395  | -0.535791311 | -6.965534128 |
| H252 | -7.025492538  | 9.376360014  | 0.781966896  |
| H253 | -8.748795264  | 9.696532469  | 0.508542004  |
| H254 | -6.189856628  | 8.617658436  | -1.128173510 |
| H255 | -6.995663562  | 7.418011170  | -2.141741449 |
| H256 | -6.582438617  | 8.070598054  | -4.966579610 |
| H257 | -3.177381343  | 5.143076711  | -5.093621766 |
| H258 | -10.551929172 | 3.224540304  | -2.767971255 |
| H259 | -8.419321074  | 3.792644622  | 1.688801254  |
| H260 | -7.373819493  | 4.986720930  | -3.423246920 |
| H261 | -1.549543946  | 6.302532934  | -1.411844787 |
| H262 | -2.055117317  | 7.897649670  | 0.194725017  |
| H263 | -3.091581237  | 4.554057866  | -2.465171560 |
| H264 | -5.246863182  | -3.335380751 | -5.929697582 |
| H265 | -2.676501222  | 11.018142733 | 0.732134991  |
| H266 | -2.680094116  | -2.026712226 | -6.097818933 |
| H267 | -2.106031145  | 7.473790169  | -2.603052464 |
| H268 | -7.012771520  | 3.412660173  | -0.291312825 |
| H269 | -3.635937667  | 10.253913438 | 2.015431282  |
| H270 | -4.939641224  | 7.677328414  | -5.342121799 |
| H271 | -8.028139184  | 6.257482338  | -4.395325242 |
| H272 | -0.242530959  | -3.292129861 | -6.398147166 |
| H273 | -1.619235995  | -4.766865785 | -4.577802961 |
| H274 | -11.955128016 | 3.737139061  | -0.791829656 |
| H275 | -4.083667691  | -0.669438811 | -3.975024389 |
| H276 | -4.393190092  | 7.448287276  | -1.610431682 |
| H277 | -3.417790545  | 6.789225456  | -4.506729230 |
| H278 | -1.693136686  | 5.115914249  | -3.370599828 |
| H279 | -5.163633576  | 4.448075917  | -3.757719084 |
| H280 | -6.238010070  | 5.446612812  | 4.656911638  |
| H281 | -6.734304272  | 6.850056862  | 1.803802864  |
| H282 | -8.425076515  | 9.002529577  | 2.765043860  |
| H283 | -5.290745835  | 6.938710730  | 4.862613952  |
| H284 | -9.222137049  | 5.794835774  | 2.191668908  |
| H285 | 7.987688356   | 4.452880427  | -5.259887554 |
| H286 | 8.601037803   | 2.858037946  | -4.781566878 |
| H287 | 10.339878146  | 2.306094274  | -0.719987342 |
| H288 | 10.040912625  | 3.780567620  | -6.444248215 |
| H289 | 9.203018575   | 2.592516868  | -7.191850004 |
| H290 | 0.898712346   | 6.364833493  | 3.367906993  |
| H291 | -1.047348915  | 7.832455368  | 5.187802483  |
| H292 | -0.799235032  | 9.865251879  | 1.458995326  |
| H293 | -0.858588950  | 6.014348144  | 3.454895568  |
| H294 | -0.336648265  | 9.290186473  | 4.970682869  |
| H295 | 3.901769171   | 7.790380506  | -1.704621172 |
| H296 | 0.450293738   | 8.709946591  | 2.817421708  |
| H297 | 6.551318755   | -5.191304966 | 5.510279996  |
| H298 | 9.123304628   | -3.896672826 | 4.456349657  |
| H299 | 3.703478675   | 5.998243449  | -3.086838857 |
| H300 | 2.323015208   | 0.567970548  | 5.509120568  |
| H301 | 2.118442989   | 5.690432006  | -6.270769589 |
| H302 | 1.999883532   | 0.003433342  | -4.545048055 |
| H303 | 1.107671813   | 5.167850104  | -4.921268216 |
| H304 | 4.395168175   | -3.595629667 | 5.123099492  |
| H305 | 3.448455117   | 4.229502960  | -4.007286651 |
| H306 | 5.049387822   | -3.249151935 | 3.521064197  |
| H307 | 6.920111139   | -4.749425565 | 3.827700888  |
| H308 | 7.128835331   | -2.306666924 | 4.596991573  |
| H309 | 6.510427049   | -2.800865990 | 6.183971475  |
| H310 | -1.063694651  | 0.171126956  | -8.169473180 |
| H311 | 8.588825805   | -6.700588621 | 5.368272653  |
| H312 | 10.132558597  | -8.051196612 | 3.099136069  |
| H313 | 1.500371692   | 2.051385804  | -3.191048892 |

|       |               |              |              |
|-------|---------------|--------------|--------------|
| H314  | 10.131238148  | -8.645490836 | 5.957624146  |
| H315  | 9.445517683   | -9.470529462 | 4.718849804  |
| H316  | 5.101418764   | -0.876585893 | 4.075446794  |
| H317  | -0.342808003  | 3.539812936  | -3.832475646 |
| H318  | 0.740841557   | -0.416517445 | -6.646385079 |
| H319  | 12.217016154  | -3.028191796 | 0.912867193  |
| H320  | 10.724835936  | -0.729331311 | -0.919497920 |
| H321  | 9.902737565   | -2.996008839 | 1.969587470  |
| H322  | 12.365880484  | -3.302361298 | -0.611307370 |
| H323  | 4.772287789   | 8.787328225  | -4.185372205 |
| H324  | 7.831445625   | -0.711470068 | 2.287670838  |
| H325  | 6.370526127   | -5.179759238 | 0.368636696  |
| H326  | 5.916226279   | 3.779393300  | -4.570763833 |
| H327  | 8.321035463   | -5.018937169 | -0.897653787 |
| H328  | 8.702498774   | -0.191407195 | -5.301591766 |
| H329  | 6.618291977   | -0.514083848 | -3.902302210 |
| H330  | 11.498777817  | -7.888752565 | 4.206353277  |
| H331  | 3.601676998   | 0.774840134  | 4.342092217  |
| H332  | 9.306186307   | -0.875664243 | 4.140095138  |
| H333  | 7.545519199   | 0.579853529  | 3.100851746  |
| H334  | 9.760524191   | -2.390209603 | 5.910590408  |
| H335  | 2.834955542   | -2.874632694 | 6.036028147  |
| H336  | 9.105070560   | -2.557081884 | -2.541756166 |
| H337  | 9.750908701   | -2.890811174 | -0.928414239 |
| H338  | 7.582260153   | -4.494184157 | -2.419373703 |
| H339  | 4.205199127   | 2.035453616  | -4.550076294 |
| H340  | -1.604782733  | 3.140285737  | -5.969616965 |
| H341  | -2.124444530  | 1.571946185  | -7.875986828 |
| H342  | 5.300721357   | -3.785731818 | 0.622167240  |
| H343  | 10.452790216  | -1.854427998 | 3.763337874  |
| H344  | 10.887303240  | -3.819128392 | 2.832246749  |
| H345  | 1.740859254   | -1.593927364 | 6.194672473  |
| H346  | 10.766780407  | 0.312408036  | -3.861533677 |
| H347  | 9.400026884   | 0.046992457  | -0.071476006 |
| H348  | 4.561387062   | 1.753303847  | -6.280205899 |
| H349  | 2.376934253   | 8.451531446  | -2.330922621 |
| H350  | 3.949947299   | 1.543017714  | 7.607436632  |
| H351  | 4.273242420   | 2.726795673  | 6.320207781  |
| H352  | 12.555567338  | 2.391351359  | -1.517064105 |
| H353  | 12.679425355  | 0.762876406  | -1.627833801 |
| H354  | 13.195704012  | -0.767685247 | 2.650052206  |
| H355  | 12.187041160  | -0.605291788 | 0.611247577  |
| H356  | 14.156597584  | 1.712859977  | 1.958938810  |
| H357  | 11.836294254  | 0.181803792  | 3.283215090  |
| H358  | 6.320624594   | 3.849101668  | 7.765892882  |
| H359  | -11.863278952 | 6.389323418  | 4.000225923  |
| H360  | 9.737627894   | -3.266296347 | 8.792009323  |
| H361  | 8.119757398   | -1.158483243 | 8.009049956  |
| H362  | -11.779114237 | 6.150302049  | 0.984977817  |
| H363  | -10.716944114 | 3.829630234  | 2.712548420  |
| H364  | -12.160008098 | 3.778044712  | 1.680292441  |
| H365  | 3.216429787   | -1.672739336 | -0.552847157 |
| H366  | -8.429278183  | 2.783591119  | -3.503809383 |
| H367  | 0.556351754   | -0.476159710 | -0.253573798 |
| H368  | 2.464964130   | -0.087325222 | 1.121001696  |
| H369  | 2.462880763   | -0.919576185 | 0.875871200  |
| H370  | -1.064803072  | -0.822325216 | -1.991584446 |
| Mo371 | 6.180973632   | -0.361295924 | -0.640784445 |
| N372  | -0.227644785  | -8.463438912 | -5.775430571 |
| N373  | -3.706007336  | -8.361217699 | -4.406612540 |
| N374  | -3.897286632  | -9.526185069 | -1.854131449 |
| N375  | -1.459446726  | -8.898176052 | -0.566695371 |
| N376  | -1.772598371  | -6.103662388 | -0.163682255 |
| N377  | -3.961891290  | -6.119274275 | 1.693619064  |
| N378  | -3.061424658  | -7.755051118 | 3.906701722  |
| N379  | -0.290065994  | -7.200730994 | 4.486482031  |
| N380  | 0.248350229   | -4.428084642 | 4.110620793  |
| N381  | -1.967364033  | -2.783787407 | 5.192806220  |
| N382  | -3.039349444  | -4.515163083 | 7.329942729  |
| N383  | 9.615753259   | -8.531800763 | 5.082292610  |
| N384  | 9.048997406   | -5.909808283 | 4.905417963  |
| N385  | 4.582193856   | -1.552494751 | 4.638899540  |
| N386  | 2.731877799   | -1.856277220 | 6.069294741  |
| N387  | 3.013629104   | 0.129862733  | 4.903607701  |
| N388  | 9.543336108   | -2.970123141 | 6.750970968  |
| N389  | -1.256301302  | -3.447219211 | -6.244829887 |
| N390  | 3.251909344   | -3.472131119 | -4.771886375 |
| N391  | -3.289233362  | -2.109637749 | -5.265836757 |
| N392  | -5.963836277  | -2.955865658 | -5.315049085 |
| N393  | -6.280846421  | -4.294119598 | -2.868250130 |
| N394  | -6.090075395  | -2.257848387 | -0.957646746 |
| N395  | -3.623696180  | 0.969533562  | -2.201921681 |

|      |               |              |               |
|------|---------------|--------------|---------------|
| N396 | -2.006164341  | -0.429033542 | -1.933054375  |
| N397 | -8.434844059  | -0.941343808 | -0.296419138  |
| N398 | -12.359572302 | 0.307873806  | -2.674985676  |
| N399 | -13.827118978 | 1.071598643  | -1.197024473  |
| N400 | 3.978454151   | 4.941516567  | 7.880757927   |
| N401 | -0.245899679  | 8.295081139  | 4.746522398   |
| N402 | -1.694424081  | 9.499797296  | 1.771524262   |
| N403 | -2.979456300  | 8.075829278  | -0.214253069  |
| N404 | -4.956353312  | 5.422325460  | -4.038682037  |
| N405 | -5.839901582  | 7.378846476  | -4.984847308  |
| N406 | -7.226595336  | 5.882612936  | -3.894781854  |
| N407 | -3.372866890  | 5.437307610  | 0.844599964   |
| N408 | -5.048262158  | 5.978094001  | 3.021811667   |
| N409 | -7.048869072  | 7.252613175  | 2.454155928   |
| N410 | -7.049175049  | 8.136121095  | -1.421564723  |
| N411 | -10.050547969 | 6.383871260  | 2.163248129   |
| N412 | 9.110637158   | 3.526944601  | -6.783577500  |
| N413 | 5.809304931   | 3.127037127  | -5.353578615  |
| N414 | 3.080965675   | 4.411736736  | -4.956873545  |
| N415 | 3.224873123   | 6.840447444  | -3.421189621  |
| N416 | 3.918851112   | 2.046674861  | -9.583317398  |
| N417 | 1.152938970   | 1.844455482  | -8.855674843  |
| N418 | 12.016085393  | 1.540764049  | -1.701342311  |
| N419 | 7.915588049   | -0.104953573 | -2.226188570  |
| N420 | 8.680855753   | -0.074956532 | -4.292305106  |
| N421 | 12.149086650  | 0.246637483  | 1.176677903   |
| N422 | -2.219049508  | 1.417015809  | 0.730505276   |
| N423 | -1.631242485  | 2.026278675  | 0.010923257   |
| O424 | -1.749445153  | -7.698396444 | -3.448620483  |
| O425 | -4.504564549  | -7.505505645 | -0.991923627  |
| O426 | -2.455449732  | -9.366307512 | 1.433969196   |
| O427 | -0.489797125  | -6.339664119 | 1.698456326   |
| O428 | -3.108935493  | -4.167298635 | 2.504485019   |
| O429 | -4.191588976  | -6.269062094 | 5.227611259   |
| O430 | -0.710093782  | -7.815587715 | 6.657913592   |
| O431 | 2.080725168   | -4.637191393 | 5.485324497   |
| O432 | -0.180465748  | -1.667072561 | 6.076477235   |
| O433 | -2.821992325  | -2.644465666 | 8.597240028   |
| O434 | -2.244144156  | -5.327826439 | 10.727698789  |
| O435 | 10.907980507  | -5.453321985 | 3.608526311   |
| O436 | 8.606034703   | -4.911607429 | 7.550212019   |
| O437 | 9.522389203   | -0.440385767 | 9.301702959   |
| O438 | -3.411521829  | -3.321628952 | -3.319503264  |
| O439 | 1.546044852   | -2.964792750 | -6.189276574  |
| O440 | -6.479985715  | -1.304176835 | -3.823697002  |
| O441 | -5.336347021  | 0.943782879  | -5.617373022  |
| O442 | -8.513034918  | -4.605687284 | -3.309474604  |
| O443 | -6.285102838  | -3.758495508 | 0.751741376   |
| O444 | -7.488548159  | -0.131803588 | 1.619844226   |
| O445 | -11.069708233 | -0.513831848 | 2.032076167   |
| O446 | 6.154484716   | 2.602799922  | 9.375201063   |
| O447 | -1.873727716  | 2.973801961  | 6.104659385   |
| O448 | -2.777233335  | 8.086652277  | 3.193694560   |
| O449 | -4.759004934  | 9.530125464  | -0.232817164  |
| O450 | -5.177532503  | 5.315807244  | -0.557961809  |
| O451 | -5.929331339  | 3.867207264  | 2.822612986   |
| O452 | -2.636778111  | 4.550292225  | 3.799454463   |
| O453 | -7.769392324  | 7.755059454  | 4.662520312   |
| O454 | -10.782366579 | 8.506754601  | 1.771072143   |
| O455 | -9.001887372  | 7.185277303  | -0.710872105  |
| O456 | -13.533852268 | 5.930481469  | 2.919136820   |
| O457 | -7.869724567  | 3.096787907  | -2.767139775  |
| O458 | 6.915360290   | 1.838448118  | -6.900406661  |
| O459 | 2.975585588   | 3.565169039  | -7.084745549  |
| O460 | 1.733078521   | 7.810931295  | -4.839464451  |
| O461 | 4.141764806   | 10.305584519 | -2.976748626  |
| O462 | 1.048841515   | 0.145063791  | -10.374772239 |
| O463 | 5.179344616   | -2.540183546 | -6.943329399  |
| O464 | 6.176966639   | -0.644603560 | -6.316106382  |
| O465 | -1.643835172  | 4.022256744  | -8.455574931  |
| O466 | 11.493373922  | 2.394457734  | 1.484816489   |
| O467 | 13.861145823  | 1.692816758  | 3.978341462   |
| O468 | 4.633250090   | -3.917763716 | -2.137374586  |
| O469 | 4.398558075   | -5.919834017 | -1.138130283  |
| O470 | 11.638357953  | -4.070906485 | -2.020363807  |
| O471 | 10.110185483  | -5.031243860 | -3.382488700  |
| O472 | 7.739958049   | -1.366183209 | 0.524698613   |
| O473 | 8.312140312   | -3.373074966 | 1.359127134   |
| O474 | 6.340530439   | -2.339229365 | -1.449796519  |
| O475 | 10.114418042  | -1.301555554 | 4.520553006   |
| O476 | 7.773075176   | -0.362149320 | 3.211804749   |
| O477 | -5.375926913  | 2.644876567  | -3.469742980  |

|                                                                                    |                                        |               |               |              |
|------------------------------------------------------------------------------------|----------------------------------------|---------------|---------------|--------------|
|                                                                                    | O478                                   | 12.859747382  | -2.925830121  | 0.176174004  |
|                                                                                    | O479                                   | 10.800813490  | -2.935931893  | 2.390918196  |
|                                                                                    | S480                                   | -0.133194454  | 6.290099638   | 1.151025626  |
|                                                                                    | S481                                   | 1.251172257   | 3.881634108   | -1.214445957 |
|                                                                                    | S482                                   | 4.475891880   | 0.079750514   | -2.218207424 |
|                                                                                    | S483                                   | 1.111296822   | 2.625321624   | 2.146870672  |
|                                                                                    | S484                                   | 1.302917160   | 0.214567697   | -1.163514615 |
|                                                                                    | S485                                   | 4.959141478   | 4.031872106   | -2.234606152 |
|                                                                                    | S486                                   | 4.897583479   | -0.944273822  | 1.228366001  |
|                                                                                    | S487                                   | 3.498065128   | 5.214418645   | 1.310831578  |
|                                                                                    | S488                                   | 6.871704491   | 1.817896257   | 0.035053516  |
|                                                                                    | S489                                   | 4.842177374   | 2.226226089   | 3.191213447  |
|                                                                                    | end                                    |               |               |              |
| <b>Fe6-H2n</b><br><b>2N2 TS</b><br><b>35, S=1</b>                                  |                                        |               |               |              |
| <b>Fe( 139) -2.500</b>                                                             |                                        |               |               |              |
| <b>Fe( 140) -1.180</b>                                                             |                                        |               |               |              |
| <b>Fe( 141) -2.539</b>                                                             |                                        |               |               |              |
| <b>Fe( 142) 2.729</b>                                                              |                                        |               |               |              |
| <b>Fe( 143) 2.802</b>                                                              |                                        |               |               |              |
| <b>Fe( 144) 2.319</b>                                                              |                                        |               |               |              |
| <b>Fe( 145) 0.114</b>                                                              |                                        |               |               |              |
| 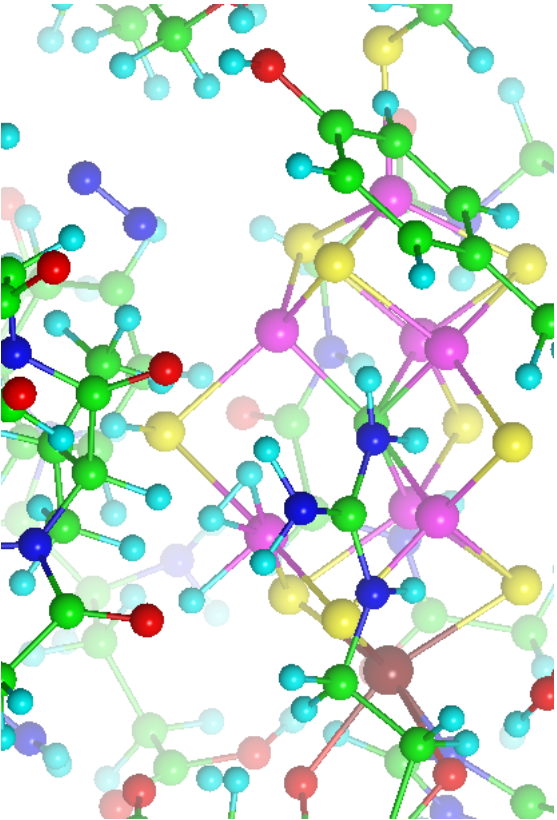 |                                        |               |               |              |
|                                                                                    | <b>bm522bh6x6h2n2n2xdtc 1 53110.82</b> |               |               |              |
|                                                                                    | C1                                     | -2.349383076  | -8.232292655  | -4.427613978 |
|                                                                                    | C2                                     | -1.652631261  | -8.832851993  | -5.653997363 |
|                                                                                    | C3                                     | -4.504366672  | -7.691172252  | -3.385847796 |
|                                                                                    | C4                                     | -4.279112765  | -8.207521498  | -1.968749101 |
|                                                                                    | C5                                     | -3.586406249  | -10.063190938 | -0.536118814 |
|                                                                                    | C6                                     | -2.444965867  | -9.369809298  | 0.210701245  |
|                                                                                    | C7                                     | -0.394936608  | -8.057905785  | 0.078316028  |
|                                                                                    | C8                                     | -0.893317889  | -6.721148828  | 0.627877273  |
|                                                                                    | C9                                     | -2.404592944  | -4.822371184  | 0.313711331  |
|                                                                                    | C10                                    | -3.205990081  | -4.978959867  | 1.615444186  |
|                                                                                    | C11                                    | -4.787645012  | -6.293926075  | 2.897166583  |
|                                                                                    | C12                                    | -3.982026846  | -6.740755981  | 4.123938632  |
|                                                                                    | C13                                    | -2.395889256  | -8.372917381  | 5.029005511  |
|                                                                                    | C14                                    | -1.063338982  | -7.760037345  | 5.478453414  |
|                                                                                    | C15                                    | 1.027491451   | -6.678074711  | 4.768430572  |
|                                                                                    | C16                                    | 1.159203690   | -5.153651729  | 4.836865673  |
|                                                                                    | C17                                    | 0.198860727   | -2.979186292  | 4.066681603  |
|                                                                                    | C18                                    | -0.669094497  | -2.428950978  | 5.221803902  |
|                                                                                    | C19                                    | -0.271943032  | -2.511637619  | 2.673143246  |
|                                                                                    | C20                                    | -0.498399055  | -0.989358135  | 2.615056883  |
|                                                                                    | C21                                    | 0.726006515   | -2.980830784  | 1.608604136  |
|                                                                                    | C22                                    | -2.932308833  | -2.308599947  | 6.214434635  |
|                                                                                    | C23                                    | -2.918520654  | -3.165466792  | 7.497880930  |
|                                                                                    | C24                                    | -4.350357389  | -2.182502201  | 5.605013245  |
|                                                                                    | C25                                    | -5.382985008  | -1.799515252  | 6.673016626  |
|                                                                                    | C26                                    | -4.364631008  | -1.161770988  | 4.459048298  |
|                                                                                    | C27                                    | -3.214226097  | -5.341543046  | 8.540408355  |
|                                                                                    | C28                                    | -2.122707205  | -5.092839784  | 9.561209970  |
|                                                                                    | C29                                    | 10.394532927  | -7.771897946  | 4.131766681  |
|                                                                                    | C30                                    | 10.137054197  | -6.266202241  | 4.197624412  |
|                                                                                    | C31                                    | 8.581042542   | -4.566194285  | 5.156765409  |
|                                                                                    | C32                                    | 8.892933271   | -4.169287776  | 6.612448547  |
|                                                                                    | C33                                    | 7.073649038   | -4.476428524  | 4.860623661  |
|                                                                                    | C34                                    | 6.503909614   | -3.070571856  | 5.061118302  |
|                                                                                    | C35                                    | 5.079217257   | -2.956243944  | 4.521645120  |
|                                                                                    | C36                                    | 3.475545291   | -1.121175181  | 5.184945772  |
|                                                                                    | C37                                    | 9.923118593   | -2.484619775  | 8.061589812  |
|                                                                                    | C38                                    | 9.149372500   | -1.258766250  | 8.494199623  |
|                                                                                    | C39                                    | -1.513271140  | -3.714902829  | -4.805268249 |
|                                                                                    | C40                                    | -2.832770686  | -3.059482991  | -4.356563500 |
|                                                                                    | C41                                    | -0.376109639  | -3.144075280  | -3.925577754 |
|                                                                                    | C42                                    | 0.973876601   | -3.888049513  | -3.998691730 |
|                                                                                    | C43                                    | 1.930379533   | -3.407661362  | -5.089476507 |
|                                                                                    | C44                                    | -4.334342128  | -1.171524791  | -4.879256659 |
|                                                                                    | C45                                    | -5.699126366  | -1.828584005  | -4.630145374 |
|                                                                                    | C46                                    | -4.392768274  | -0.084818879  | -5.963303447 |
|                                                                                    | C47                                    | -7.160156488  | -3.743526514  | -5.094356637 |
|                                                                                    | C48                                    | -7.374294449  | -4.260386701  | -3.667803045 |
|                                                                                    | C49                                    | -6.393152601  | -4.667469855  | -1.455473141 |
|                                                                                    | C50                                    | -6.250505543  | -3.530417517  | -0.445135470 |
|                                                                                    | C51                                    | -6.020926275  | -1.135117119  | -0.020312624 |
|                                                                                    | C52                                    | -7.408882872  | -0.742591760  | 0.542172658  |
|                                                                                    | C53                                    | -5.468312071  | 0.128185120   | -0.696887203 |
|                                                                                    | C54                                    | -4.085197099  | 0.040748290   | -1.249638351 |
|                                                                                    | C55                                    | -3.036613808  | -0.823579906  | -1.055339979 |
|                                                                                    | C56                                    | -2.362610181  | 0.744440623   | -2.490158146 |
|                                                                                    | C57                                    | -9.786170519  | -0.458924480  | -0.054436008 |
|                                                                                    | C58                                    | -10.317563086 | -1.114233247  | 1.219554742  |
|                                                                                    | C59                                    | -10.665491531 | -0.830433320  | -1.269492554 |
|                                                                                    | C60                                    | -11.936159057 | -0.051399623  | -1.434169569 |
|                                                                                    | C61                                    | -12.845982021 | 0.408145424   | -0.501716480 |
|                                                                                    | C62                                    | -13.486336804 | 0.970476560   | -2.547055524 |
|                                                                                    | C63                                    | 4.171612390   | 3.548108751   | 8.337791342  |
|                                                                                    | C64                                    | 5.655351018   | 3.303303245   | 8.539158681  |
|                                                                                    | C65                                    | 3.6871115603  | 2.537905322   | 7.266416860  |
|                                                                                    | C66                                    | 2.206784758   | 2.648133474   | 6.982982311  |
|                                                                                    | C67                                    | 1.264285704   | 1.916447974   | 7.728913541  |

|       |               |              |              |
|-------|---------------|--------------|--------------|
| C68   | 1.727211613   | 3.493990908  | 5.966272448  |
| C69   | -0.106360923  | 2.013371970  | 7.465930941  |
| C70   | 0.362284380   | 3.613191798  | 5.703966537  |
| C71   | -0.552961639  | 2.864428606  | 6.449029196  |
| C72   | -0.334906950  | 8.092415899  | 3.316346035  |
| C73   | -1.697759372  | 8.537109792  | 2.756588098  |
| C74   | -0.071386101  | 6.629333393  | 2.973835708  |
| C75   | -2.883912293  | 10.058862580 | 1.221090594  |
| C76   | -3.620968089  | 9.172520707  | 0.215163361  |
| C77   | -3.526566164  | 7.048314265  | -1.072120737 |
| C78   | -4.109416563  | 5.870506478  | -0.247896070 |
| C79   | -2.404478014  | 6.576145091  | -2.026165252 |
| C80   | -2.685996618  | 5.420529282  | -2.994112537 |
| C81   | -3.538333212  | 5.743344560  | -4.232858229 |
| C82   | -5.996320839  | 6.210687431  | -4.310846684 |
| C83   | -3.880772772  | 4.319177829  | 1.629392982  |
| C84   | -5.069245086  | 4.711996978  | 2.517690266  |
| C85   | -2.803656192  | 3.701975371  | 2.548380445  |
| C86   | -5.862796807  | 6.383492667  | 4.116081535  |
| C87   | -7.084844705  | 7.212035583  | 3.756130695  |
| C88   | -8.399441935  | 8.213798985  | 1.971877243  |
| C89   | -9.863427988  | 7.704714560  | 1.926858665  |
| C90   | -8.037571759  | 8.896563170  | 0.650048255  |
| C91   | -8.079773655  | 7.961539820  | -0.549799020 |
| C92   | -11.356923147 | 5.751326577  | 1.911002643  |
| C93   | -12.332035448 | 6.052927381  | 3.039138349  |
| C94   | -11.159563885 | 4.212822542  | 1.778287399  |
| C95   | -10.301269143 | 3.836532368  | 0.589837192  |
| C96   | -10.881563644 | 3.649074336  | -0.673187461 |
| C97   | -8.906257362  | 3.713167098  | 0.698425234  |
| C98   | -10.102035728 | 3.364180639  | -1.796393855 |
| C99   | -8.105430443  | 3.456905020  | -0.419109544 |
| C100  | -8.715621871  | 3.289338803  | -1.658646868 |
| C101  | 8.174819989   | 3.458417916  | -5.627632058 |
| C102  | 6.897542159   | 2.748361405  | -6.037344586 |
| C103  | 4.478458052   | 2.510454761  | -5.529410282 |
| C104  | 3.414781483   | 3.534905072  | -5.944767507 |
| C105  | 2.116002204   | 5.481564430  | -5.206886106 |
| C106  | 2.328765685   | 6.797660975  | -4.462653723 |
| C107  | 3.310994294   | 8.034460411  | -2.606009573 |
| C108  | 4.184771141   | 9.079347404  | -3.273371981 |
| C109  | 3.227566423   | 0.719359377  | -9.537936412 |
| C110  | 1.704289496   | 0.869652262  | -9.622088974 |
| C111  | 3.601269441   | -0.218794739 | -8.368683287 |
| C112  | 5.060954046   | -0.698568978 | -8.483936924 |
| C113  | 5.495494375   | -1.388638439 | -7.210564519 |
| C114  | -0.294875673  | 2.051877503  | -8.857685328 |
| C115  | -0.597568161  | 3.537675444  | -8.844693411 |
| C116  | -1.103385529  | 1.219369384  | -7.831961481 |
| C117  | -0.511151006  | 1.351435532  | -6.457383070 |
| C118  | -0.831888266  | 2.445920818  | -5.638090797 |
| C119  | 0.499565028   | 0.464763404  | -6.044663680 |
| C120  | -0.095855305  | 2.693828476  | -4.474288928 |
| C121  | 1.238147111   | 0.716508689  | -4.885390397 |
| C122  | 0.962953859   | 1.852723300  | -4.118534311 |
| C123  | 10.963989691  | 1.414314528  | -0.656098173 |
| C124  | 11.538722320  | 1.391961378  | 0.768359827  |
| C125  | 10.116994992  | 0.160854109  | -0.923808588 |
| C126  | 9.329086755   | 0.145281942  | -2.195703007 |
| C127  | 9.819622051   | 0.178261413  | -3.484454932 |
| C128  | 7.641900553   | -0.210876647 | -3.547483780 |
| C129  | 12.638381544  | 0.183131521  | 2.557976219  |
| C130  | 13.617437079  | 1.298105878  | 2.847868929  |
| C131  | 4.925103275   | -4.766837136 | -1.211456265 |
| C132  | 5.926474857   | -4.293658370 | -0.158903563 |
| C133  | 7.028733454   | -3.334550079 | -0.695604724 |
| C134  | 8.081617220   | -4.133212083 | -1.513013305 |
| C135  | 9.363236324   | -3.367224368 | -1.855560778 |
| C136  | 10.470880027  | -4.248783705 | -2.473756343 |
| C137  | 7.756928373   | -2.680602666 | 0.488695758  |
| C138  | 3.540400956   | 2.090812820  | 0.160581508  |
| Fe139 | 4.998884751   | 2.021229183  | -1.226847917 |
| Fe140 | 1.565599330   | 2.195297455  | 0.106525014  |
| Fe141 | 3.479037866   | 3.154048215  | 1.828818608  |
| Fe142 | 3.437045513   | 3.908158336  | -0.645652154 |
| Fe143 | 1.482435948   | 4.653650429  | 1.016654540  |
| Fe144 | 5.068619517   | 1.286866088  | 1.214330016  |
| Fe145 | 3.444567635   | -0.197461698 | -0.278850536 |
| H146  | 0.274402745   | -8.725464130 | -4.991530658 |
| H147  | -0.156287204  | -7.470362277 | -5.941625213 |
| H148  | -4.184225810  | -8.697998924 | -5.240059446 |
| H149  | -2.219557178  | -8.549960290 | -6.554900961 |

|      |               |               |               |
|------|---------------|---------------|---------------|
| H150 | -1.742167553  | -9.929679899  | -5.571908518  |
| H151 | -4.292106921  | -6.611653785  | -3.363972755  |
| H152 | -3.728577293  | -10.043791728 | -2.682880227  |
| H153 | -5.565720015  | -7.824262561  | -3.634638027  |
| H154 | -3.324329918  | -11.120590429 | -0.676075852  |
| H155 | -1.539905163  | -8.821557823  | -1.563776443  |
| H156 | -4.469052463  | -10.012334756 | 0.116031767   |
| H157 | -1.641798030  | -4.055679196  | 0.497904397   |
| H158 | -2.104031656  | -6.472201961  | -1.014438303  |
| H159 | 0.393385196   | -7.874348315  | -0.663148721  |
| H160 | -5.300431101  | -5.362924606  | 3.170619840   |
| H161 | -4.084962484  | -6.699017852  | 0.898890417   |
| H162 | 0.043029672   | -8.611732939  | 0.917097681   |
| H163 | -3.066170351  | -4.467320494  | -0.488720887  |
| H164 | -2.984227824  | -8.148158871  | 2.985391598   |
| H165 | -5.542318888  | -7.059483838  | 2.673708772   |
| H166 | 0.809434994   | -4.075911769  | 1.570409805   |
| H167 | 0.424297368   | -2.637005178  | 0.606027106   |
| H168 | 1.729037551   | -2.576278672  | 1.814160647   |
| H169 | -1.241112976  | -3.002663002  | 2.489147574   |
| H170 | -2.201549250  | -9.420648441  | 4.753877762   |
| H171 | -3.665837403  | -1.429992053  | 3.653710295   |
| H172 | -3.302071703  | -4.931014860  | 6.455509750   |
| H173 | -5.444657092  | -2.540633871  | 7.482312603   |
| H174 | 0.397738962   | -0.453079129  | 2.272564919   |
| H175 | -0.773856091  | -0.556878093  | 3.587364687   |
| H176 | 3.661669263   | 3.304067741   | 9.289765639   |
| H177 | -5.372097913  | -1.099189202  | 4.021731686   |
| H178 | -6.378886782  | -1.715582125  | 6.212957883   |
| H179 | -4.094395478  | -0.160541483  | 4.831980895   |
| H180 | -5.133874138  | -0.825456555  | 7.124386412   |
| H181 | -4.630176456  | -3.169806148  | 5.194653249   |
| H182 | -2.588595119  | -1.317546849  | 6.543053859   |
| H183 | -2.341245126  | -3.338193167  | 4.427858762   |
| H184 | -1.321430901  | -0.755617723  | 1.922040110   |
| H185 | -1.853272640  | 3.637068327   | 1.999445786   |
| H186 | -3.143249902  | 2.683164068   | 2.791943227   |
| H187 | -2.410936273  | 3.863411379   | 4.468819865   |
| H188 | -2.427747737  | 2.427770151   | 6.705442771   |
| H189 | 0.008795046   | 4.256457622   | 4.898315910   |
| H190 | 2.436192368   | 4.048696940   | 5.347593761   |
| H191 | 1.603641179   | 1.244837301   | 8.521190916   |
| H192 | -0.429028024  | -4.960631713  | 3.568929532   |
| H193 | 1.727152467   | -7.029270616  | 3.994924718   |
| H194 | 1.364481877   | -7.068870113  | 5.735608926   |
| H195 | -0.617259302  | -7.214293686  | 3.528131811   |
| H196 | -3.054874557  | -8.367085819  | 5.907094590   |
| H197 | -0.819885284  | 1.415154460   | 8.037426831   |
| H198 | 1.213356089   | -2.609622180  | 4.252424668   |
| H199 | -4.197203698  | -5.217062826  | 9.026690303   |
| H200 | -3.118168884  | -6.391687002  | 8.219550003   |
| H201 | -1.142666203  | -4.774268757  | 9.137587784   |
| H202 | 11.002260744  | -2.269685975  | 8.100642688   |
| H203 | 3.922440462   | -3.189109007  | -5.501943633  |
| H204 | 5.346748728   | -3.054340557  | -1.997805384  |
| H205 | 5.141568741   | -1.420685080  | -9.309736470  |
| H206 | 5.725608456   | 0.150060609   | -8.701001855  |
| H207 | 2.937603842   | -1.097344700  | -8.357053953  |
| H208 | 0.210809877   | 4.174647877   | -9.275211191  |
| H209 | 3.486333173   | 0.197597087   | -10.471875291 |
| H210 | -0.229001983  | -2.083042415  | -4.192903066  |
| H211 | 0.800882924   | -4.964675063  | -4.167900961  |
| H212 | 1.724169483   | 2.390694416   | -8.206899723  |
| H213 | -0.620660948  | 1.722971636   | -9.866872439  |
| H214 | 3.833662803   | 2.510594308   | -8.675508295  |
| H215 | 3.589737360   | -3.737203317  | -3.863998949  |
| H216 | 3.438639774   | 0.310923973   | -7.417393403  |
| H217 | 4.893362937   | 1.895324508   | -9.777939250  |
| H218 | -1.592211946  | -4.253622397  | -6.796794223  |
| H219 | -0.722728994  | -3.183639610  | -2.881772225  |
| H220 | 6.388722728   | 0.282136836   | -6.677836552  |
| H221 | 1.476242679   | -3.815085401  | -3.022551745  |
| H222 | -5.410760581  | -1.415122543  | 0.849957385   |
| H223 | -2.949474278  | -1.711548994  | -0.442650101  |
| H224 | -7.390785743  | -5.103808847  | -1.302478938  |
| H225 | -5.365980208  | -3.993379062  | -3.199421585  |
| H226 | -8.264523054  | -1.455328521  | -1.181058628  |
| H227 | -12.877422354 | 0.349217992   | 0.580788573   |
| H228 | -9.971269237  | -2.166787082  | 1.362033135   |
| H229 | -10.867044638 | -1.917040211  | -1.250687959  |
| H230 | -9.773814741  | 0.632621937   | 0.092457581   |
| H231 | -14.093652669 | 1.408013791   | -3.335915185  |

|      |               |              |              |
|------|---------------|--------------|--------------|
| H232 | -5.503747926  | 0.938669191  | 0.049984160  |
| H233 | -6.145552774  | 0.418938214  | -1.515627880 |
| H234 | -14.643818702 | 1.514440854  | -0.844239508 |
| H235 | -10.067917233 | -0.646759274 | -2.176616516 |
| H236 | -6.104538035  | -2.093428205 | -1.948045306 |
| H237 | -5.660999403  | -5.446156414 | -1.194012923 |
| H238 | -8.047111596  | -3.144669086 | -5.343489827 |
| H239 | -1.732122092  | 1.331086990  | -3.155577192 |
| H240 | -7.140261887  | -4.606735465 | -5.772390579 |
| H241 | 4.114107176   | 5.571289048  | 8.662905113  |
| H242 | 3.005191733   | 5.050448109  | 7.580751375  |
| H243 | -2.400714619  | 5.744806317  | 0.959690877  |
| H244 | -4.254519462  | 3.534586838  | 0.957067027  |
| H245 | -4.179319297  | 6.530612149  | 2.847594844  |
| H246 | -4.247797500  | 1.752944337  | -2.559607115 |
| H247 | -5.406901545  | 2.052332165  | -4.257628964 |
| H248 | -5.593107930  | 1.405419448  | -6.399795717 |
| H249 | -6.305508429  | 2.643661077  | -3.084426224 |
| H250 | -3.387660494  | 0.356300812  | -6.064353368 |
| H251 | -4.683133455  | -0.533623395 | -6.925263327 |
| H252 | -7.062126113  | 9.393425100  | 0.745875078  |
| H253 | -8.795628322  | 9.675975256  | 0.478460606  |
| H254 | -6.160249966  | 8.532810543  | -1.069910494 |
| H255 | -6.938398555  | 7.311483841  | -2.075318617 |
| H256 | -6.610602700  | 8.086872002  | -4.866747261 |
| H257 | -3.171169335  | 5.171427382  | -5.098170803 |
| H258 | -10.573047224 | 3.204668525  | -2.770021163 |
| H259 | -8.411898704  | 3.804007410  | 1.669229211  |
| H260 | -7.386997383  | 4.920294005  | -3.490292837 |
| H261 | -1.547929318  | 6.272889087  | -1.401783688 |
| H262 | -2.018861922  | 7.909511155  | 0.167757658  |
| H263 | -3.115003576  | 4.556296865  | -2.463451006 |
| H264 | -5.214741485  | -3.342855040 | -5.911726072 |
| H265 | -2.633431122  | 11.003138297 | 0.719799109  |
| H266 | -2.675241117  | -2.030201246 | -6.055472648 |
| H267 | -2.067997768  | 7.453670001  | -2.601716474 |
| H268 | -7.019280306  | 3.423461741  | -0.320238125 |
| H269 | -3.603080646  | 10.282244140 | 2.021768704  |
| H270 | -4.951345951  | 7.738569478  | -5.220417606 |
| H271 | -8.039886464  | 6.255090037  | -4.381297795 |
| H272 | -0.266028146  | -3.317637682 | -6.394838259 |
| H273 | -1.617734880  | -4.788881928 | -4.563489168 |
| H274 | -11.965754118 | 3.715379372  | -0.787281574 |
| H275 | -4.096090000  | -0.694019967 | -3.919353879 |
| H276 | -4.363981245  | 7.480447806  | -1.628587111 |
| H277 | -3.425902388  | 6.805253418  | -4.486283719 |
| H278 | -1.705833935  | 5.091296252  | -3.365000421 |
| H279 | -5.157510164  | 4.434927137  | -3.791141013 |
| H280 | -6.212533396  | 5.485705215  | 4.647663512  |
| H281 | -6.743665103  | 6.851732896  | 1.770407339  |
| H282 | -8.433063140  | 9.001890501  | 2.740064206  |
| H283 | -5.263072849  | 6.980144275  | 4.816118153  |
| H284 | -9.232319091  | 5.793748944  | 2.182652476  |
| H285 | 7.942871610   | 4.464057985  | -5.247699444 |
| H286 | 8.573642712   | 2.875915604  | -4.771576673 |
| H287 | 10.312508086  | 2.300669834  | -0.689776346 |
| H288 | 10.019872556  | 3.805477652  | -6.421009354 |
| H289 | 9.177149844   | 2.633662688  | -7.194469074 |
| H290 | 0.907188593   | 6.357602025  | 3.390532459  |
| H291 | -1.088671026  | 7.781598806  | 5.188726310  |
| H292 | -0.772075284  | 9.870419738  | 1.492551214  |
| H293 | -0.845994462  | 5.997352746  | 3.429459719  |
| H294 | -0.374450023  | 9.244182679  | 5.021202093  |
| H295 | 3.778357443   | 7.765509469  | -1.646641764 |
| H296 | 0.460163028   | 8.711723483  | 2.873360438  |
| H297 | 6.542397691   | -5.203006722 | 5.498475296  |
| H298 | 9.124298281   | -3.911459741 | 4.464598470  |
| H299 | 3.644482300   | 5.980046013  | -3.063291598 |
| H300 | 2.367236206   | 0.565706422  | 5.524852673  |
| H301 | 2.113628138   | 5.710412372  | -6.280481419 |
| H302 | 2.034583361   | 0.033128891  | -4.581056123 |
| H303 | 1.096611341   | 5.142602911  | -4.956558790 |
| H304 | 4.396425510   | -3.620608699 | 5.062846103  |
| H305 | 3.450901857   | 4.231850207  | -4.031221169 |
| H306 | 5.055375821   | -3.267213177 | 3.464344245  |
| H307 | 6.933346034   | -4.789997059 | 3.813675396  |
| H308 | 7.131306017   | -2.336786079 | 4.532660010  |
| H309 | 6.508354168   | -2.794299020 | 6.127866021  |
| H310 | -1.090481097  | 0.171500039  | -8.163889689 |
| H311 | 8.597183467   | -6.710802573 | 5.396167585  |
| H312 | 10.111873242  | -8.080067450 | 3.113454066  |
| H313 | 1.552533687   | 2.091818422  | -3.235451578 |



|       |               |              |              |
|-------|---------------|--------------|--------------|
| H314  | 10.138303018  | -8.655999031 | 5.975027749  |
| H315  | 9.436796867   | -9.485138375 | 4.749574381  |
| H316  | 5.109627405   | -0.899525263 | 4.027621320  |
| H317  | -0.314408614  | 3.558300078  | -3.843753307 |
| H318  | 0.729934475   | -0.415392834 | -6.649339073 |
| H319  | 12.204956011  | -3.042578285 | 0.902221414  |
| H320  | 10.779175708  | -0.722573847 | -0.937273945 |
| H321  | 9.897298865   | -3.003713315 | 1.965304695  |
| H322  | 12.368600194  | -3.304883032 | -0.624596041 |
| H323  | 4.752818603   | 8.724935761  | -4.165709062 |
| H324  | 7.848209192   | -0.718988093 | 2.271938728  |
| H325  | 6.370467534   | -5.168821099 | 0.330673204  |
| H326  | 5.886373208   | 3.770196474  | -4.580283167 |
| H327  | 8.346849638   | -5.015666016 | -0.909869458 |
| H328  | 8.776590970   | -0.147598013 | -5.324955079 |
| H329  | 6.664762755   | -0.433905410 | -3.956105062 |
| H330  | 11.486364899  | -7.908346492 | 4.208351716  |
| H331  | 3.651152637   | 0.774780810  | 4.357025826  |
| H332  | 9.307092422   | -0.885769725 | 4.137373181  |
| H333  | 7.517673845   | 0.558012154  | 3.094077509  |
| H334  | 9.755056159   | -2.404627877 | 5.916939859  |
| H335  | 2.832331546   | -2.899619772 | 5.973451987  |
| H336  | 9.134286545   | -2.566687368 | -2.575378218 |
| H337  | 9.773586403   | -2.885077526 | -0.957763072 |
| H338  | 7.605456609   | -4.501250235 | -2.435087204 |
| H339  | 4.189818491   | 2.023622340  | -4.583538657 |
| H340  | -1.624418961  | 3.130510723  | -5.948388475 |
| H341  | -2.142265658  | 1.580873394  | -7.868438362 |
| H342  | 5.326081086   | -3.758891338 | 0.598075750  |
| H343  | 10.447747993  | -1.872095108 | 3.764701261  |
| H344  | 10.877738796  | -3.833087481 | 2.825102919  |
| H345  | 1.766062287   | -1.602862800 | 6.179794687  |
| H346  | 10.829907535  | 0.308700052  | -3.854386456 |
| H347  | 9.429182873   | 0.007767164  | -0.084938480 |
| H348  | 4.550349160   | 1.758066599  | -6.316626638 |
| H349  | 2.329937486   | 8.482402956  | -2.385704501 |
| H350  | 3.926736562   | 1.526701745  | 7.626989400  |
| H351  | 4.257635809   | 2.708698834  | 6.339093863  |
| H352  | 12.517385351  | 2.465657126  | -1.482306154 |
| H353  | 12.703561796  | 0.844889827  | -1.601531686 |
| H354  | 13.185842266  | -0.766617735 | 2.664979452  |
| H355  | 12.153746285  | -0.610675738 | 0.638641380  |
| H356  | 14.165762320  | 1.686381503  | 1.957099805  |
| H357  | 11.834378486  | 0.187418857  | 3.310383890  |
| H358  | 6.306707941   | 3.806948079  | 7.784237765  |
| H359  | -11.859667657 | 6.359733023  | 4.002500229  |
| H360  | 9.709296756   | -3.279617236 | 8.797077066  |
| H361  | 8.152635421   | -1.127529113 | 8.007017931  |
| H362  | -11.797292147 | 6.140163674  | 0.977598697  |
| H363  | -10.710773584 | 3.832480036  | 2.709213824  |
| H364  | -12.157953480 | 3.761568227  | 1.684776120  |
| H365  | 3.257203205   | -1.629095622 | -0.685275062 |
| H366  | -8.453750111  | 2.738965671  | -3.511868270 |
| H367  | 0.636083213   | -0.470699280 | -0.461019589 |
| H368  | 2.487627375   | -0.147140586 | 1.029886759  |
| H369  | 2.510574461   | -0.970335585 | 0.727179964  |
| H370  | -1.046375694  | -0.750278394 | -1.882940053 |
| Mo371 | 6.222387811   | -0.357076957 | -0.665696452 |
| N372  | -0.253727397  | -8.482839566 | -5.833308256 |
| N373  | -3.710286794  | -8.356219502 | -4.407547378 |
| N374  | -3.872109240  | -9.490706874 | -1.841220196 |
| N375  | -1.450421137  | -8.840940574 | -0.546154695 |
| N376  | -1.782405923  | -6.053088200 | -0.145276796 |
| N377  | -3.976877336  | -6.085786914 | 1.709339153  |
| N378  | -3.076165378  | -7.730664884 | 3.915607687  |
| N379  | -0.299711989  | -7.199065682 | 4.499489167  |
| N380  | 0.247747079   | -4.441582060 | 4.128363951  |
| N381  | -1.979429257  | -2.787805836 | 5.209893202  |
| N382  | -3.071443246  | -4.506458226 | 7.357362146  |
| N383  | 9.612781558   | -8.544480971 | 5.105326037  |
| N384  | 9.053660546   | -5.923240044 | 4.923980984  |
| N385  | 4.587904009   | -1.575826673 | 4.588139203  |
| N386  | 2.749997440   | -1.879341782 | 6.034467863  |
| N387  | 3.067581262   | 0.135039757  | 4.925004642  |
| N388  | 9.531857396   | -2.981721989 | 6.757420596  |
| N389  | -1.280084934  | -3.461033551 | -6.231707158 |
| N390  | 3.240015775   | -3.467601958 | -4.789458779 |
| N391  | -3.283601008  | -2.113552048 | -5.222205374 |
| N392  | -5.945644476  | -2.972935243 | -5.307503654 |
| N393  | -6.280880934  | -4.301971884 | -2.854462001 |
| N394  | -6.073554275  | -2.265274220 | -0.938320044 |
| N395  | -3.631546844  | 0.999780061  | -2.145835351 |

|      |               |              |               |
|------|---------------|--------------|---------------|
| N396 | -1.992530452  | -0.364786919 | -1.835770956  |
| N397 | -8.439451099  | -0.948135546 | -0.317278471  |
| N398 | -12.346725391 | 0.307939637  | -2.708104169  |
| N399 | -13.822046362 | 1.056353999  | -1.229155136  |
| N400 | 3.976299502   | 4.926236406  | 7.880699657   |
| N401 | -0.276631708  | 8.254187349  | 4.778380329   |
| N402 | -1.670397945  | 9.497721324  | 1.787441622   |
| N403 | -2.952533189  | 8.084043380  | -0.220400787  |
| N404 | -4.957301823  | 5.416081152  | -4.054096621  |
| N405 | -5.856280814  | 7.408524964  | -4.905989135  |
| N406 | -7.236317045  | 5.835041112  | -3.922249473  |
| N407 | -3.375449459  | 5.425072958  | 0.811619964   |
| N408 | -5.034678142  | 5.986341606  | 2.993977504   |
| N409 | -7.411829863  | 7.255071772  | 2.426893588   |
| N410 | -7.016950328  | 8.065159765  | -1.394544524  |
| N411 | -10.062338145 | 6.381037042  | 2.148369536   |
| N412 | 9.089833366   | 3.561020096  | -6.768179195  |
| N413 | 5.786136761   | 3.131268174  | -5.375686620  |
| N414 | 3.079862034   | 4.418287256  | -4.979339159  |
| N415 | 3.166478446   | 6.823048902  | -3.395272313  |
| N416 | 3.899384318   | 2.023934411  | -9.577708893  |
| N417 | 1.139446324   | 1.830880750  | -8.836053513  |
| N418 | 12.011790819  | 1.597029709  | -1.676482178  |
| N419 | 7.954181871   | -0.087321282 | -2.256305504  |
| N420 | 8.744056360   | -0.046035528 | -4.313958490  |
| N421 | 12.126479299  | 0.243484034  | 1.199923904   |
| N422 | -2.174071584  | 1.865152758  | 0.325500531   |
| N423 | -1.074531678  | 1.960675575  | 0.206179863   |
| O424 | -1.733309097  | -7.706069743 | -3.485457197  |
| O425 | -4.469279531  | -7.462388384 | -0.989313780  |
| O426 | -2.440362533  | -9.328728261 | 1.452510883   |
| O427 | -0.505765669  | -6.279480958 | 1.722614677   |
| O428 | -3.143526635  | -4.123486870 | 2.513827401   |
| O429 | -4.202020973  | -6.246610111 | 5.242950745   |
| O430 | -0.717272827  | -7.843380495 | 6.663886415   |
| O431 | 2.095024988   | -4.652547407 | 5.484581689   |
| O432 | -0.179521799  | -1.695103632 | 6.100695579   |
| O433 | -2.793912510  | -2.635501910 | 8.614276832   |
| O434 | -2.271439182  | -5.300082698 | 10.756650979  |
| O435 | 10.885978728  | -5.478679755 | 3.584113305   |
| O436 | 8.569647613   | -4.911692143 | 7.556417230   |
| O437 | 9.557696202   | -0.464397074 | 9.326449079   |
| O438 | -3.413513899  | -3.349879037 | -3.291420447  |
| O439 | 1.518237814   | -3.012766468 | -6.205567362  |
| O440 | -6.498386520  | -1.329965334 | -3.818206908  |
| O441 | -5.352509400  | 0.923454837  | -5.588391305  |
| O442 | -8.505379386  | -4.625074780 | -3.321957987  |
| O443 | -6.303152559  | -3.767547460 | 0.766498992   |
| O444 | -7.531828383  | -0.195318049 | 1.640768941   |
| O445 | -11.084569739 | -0.581519619 | 2.002590942   |
| O446 | 6.123208905   | 2.598409784  | 9.421908772   |
| O447 | -1.889835216  | 2.992526768  | 6.121375176   |
| O448 | -2.769422356  | 8.060603734  | 3.170059466   |
| O449 | -4.763497122  | 9.493348281  | -0.166823101  |
| O450 | -5.199740881  | 5.368803304  | -0.567083341  |
| O451 | -5.943794506  | 3.885259273  | 2.809217795   |
| O452 | -2.627092991  | 4.474036032  | 3.734746721   |
| O453 | -7.738162794  | 7.791947164  | 4.631612726   |
| O454 | -10.793793917 | 8.503985843  | 1.752296021   |
| O455 | -9.031056276  | 7.193167120  | -0.753370358  |
| O456 | -13.541386041 | 5.943852261  | 2.918909112   |
| O457 | -7.894057926  | 3.078911106  | -2.786808041  |
| O458 | 6.914840820   | 1.845764589  | -6.909580946  |
| O459 | 2.923467802   | 3.547845645  | -7.092513775  |
| O460 | 1.692660021   | 7.798252898  | -4.831886493  |
| O461 | 4.287324823   | 10.222648038 | -2.860512704  |
| O462 | 1.024993052   | 0.134747342  | -10.357168959 |
| O463 | 5.189162472   | -2.542697929 | -6.931807936  |
| O464 | 6.209781985   | -0.648859788 | -6.337008035  |
| O465 | -1.646331931  | 4.026107896  | -8.450254303  |
| O466 | 11.517795851  | 2.405517807  | 1.493424748   |
| O467 | 13.866115070  | 1.703801449  | 3.974899643   |
| O468 | 4.670340068   | -3.889520587 | -2.187869818  |
| O469 | 4.349143129   | -5.851710537 | -1.137870862  |
| O470 | 11.664066956  | -4.069887693 | -2.044483154  |
| O471 | 10.131532981  | -5.067209174 | -3.374326082  |
| O472 | 7.775489396   | -1.372337860 | 0.511516738   |
| O473 | 8.321249531   | -3.384780652 | 1.346330860   |
| O474 | 6.388530016   | -2.325710455 | -1.479789976  |
| O475 | 10.108395705  | -1.319458613 | 4.521727428   |
| O476 | 7.781044394   | -0.375896987 | 3.197880651   |
| O477 | -5.388233309  | 2.646091200  | -3.457934149  |

|                                                     |      |               |                              |              |
|-----------------------------------------------------|------|---------------|------------------------------|--------------|
|                                                     | O478 | 12.852155492  | -2.931887779                 | 0.170882615  |
|                                                     | O479 | 10.795641090  | -2.947715144                 | 2.389219419  |
|                                                     | S480 | -0.070160094  | 6.322086126                  | 1.152446368  |
|                                                     | S481 | 1.205769793   | 3.991228279                  | -1.155872952 |
|                                                     | S482 | 4.548773351   | 0.071654584                  | -2.268835462 |
|                                                     | S483 | 1.289311478   | 2.809517592                  | 2.271052148  |
|                                                     | S484 | 1.401982164   | 0.310477018                  | -1.271276127 |
|                                                     | S485 | 4.944473857   | 3.974451352                  | -2.277978648 |
|                                                     | S486 | 4.933393241   | -0.946684483                 | 1.199125499  |
|                                                     | S487 | 3.691544735   | 5.257681398                  | 1.171723921  |
|                                                     | S488 | 6.872254688   | 1.826287415                  | 0.001368407  |
|                                                     | S489 | 4.971517112   | 2.236039323                  | 3.190527620  |
|                                                     | end  |               |                              |              |
| <b>pre-capture<br/>2N2 associated<br/>35, S=1/2</b> |      |               | <b>precapt2n2x1dte.car_4</b> |              |
| <b>Fe( 139) -2.391</b>                              | C1   | -7.585002415  | -5.411784938                 | -1.926072816 |
| <b>Fe( 140) -0.981</b>                              | C2   | -7.645401031  | -6.309327111                 | -3.165938612 |
| <b>Fe( 141) -2.566</b>                              | C3   | -8.800293620  | -3.800016407                 | -0.530397341 |
| <b>Fe( 142) 2.698</b>                               | C4   | -8.504437054  | -4.349314519                 | 0.860914836  |
| <b>Fe( 143) 2.755</b>                               | C5   | -8.473129632  | -6.289817320                 | 2.348856879  |
| <b>Fe( 144) 1.259</b>                               | C6   | -6.982395741  | -6.376390733                 | 2.688516305  |
| <b>Fe( 145) 0.122</b>                               | C7   | -4.679286595  | -6.391071255                 | 1.880653513  |
|                                                     | C8   | -4.236267223  | -4.994940154                 | 2.333948745  |
|                                                     | C9   | -4.607000001  | -2.583281401                 | 2.057648312  |
|                                                     | C10  | -5.007912156  | -2.309189632                 | 3.515292398  |
|                                                     | C11  | -6.612659643  | -2.611665413                 | 5.297015959  |
|                                                     | C12  | -5.826709308  | -3.384385135                 | 6.366424131  |
|                                                     | C13  | -5.050502135  | -5.587788570                 | 7.121114384  |
|                                                     | C14  | -3.538038622  | -5.854629205                 | 7.123232227  |
|                                                     | C15  | -1.511239304  | -6.194969461                 | 5.764127420  |
|                                                     | C16  | -0.685666059  | -4.934839755                 | 5.498976034  |
|                                                     | C17  | -0.763944991  | -2.539505201                 | 4.938926295  |
|                                                     | C18  | -0.939934451  | -1.573336607                 | 6.127265484  |
|                                                     | C19  | -1.155796611  | -1.955426012                 | 3.555711867  |
|                                                     | C20  | -0.616161892  | -0.538113956                 | 3.335552375  |
|                                                     | C21  | -0.690564562  | -2.891008770                 | 2.433785029  |
|                                                     | C22  | -2.419454580  | -0.100100940                 | 7.414764690  |
|                                                     | C23  | -2.437425721  | -0.734998482                 | 8.818682275  |
|                                                     | C24  | -3.687257479  | 0.733696239                  | 7.108550581  |
|                                                     | C25  | -4.039335726  | 1.663041809                  | 8.275751396  |
|                                                     | C26  | -3.495663422  | 1.544281923                  | 5.818960080  |
|                                                     | C27  | -3.295570411  | -2.455982938                 | 10.297385403 |
|                                                     | C28  | -1.939916605  | -2.758867994                 | 10.907405571 |
|                                                     | C29  | 5.163163666   | -12.244316458                | 2.635376877  |
|                                                     | C30  | 5.858191315   | -10.889328917                | 2.549710286  |
|                                                     | C31  | 5.911899984   | -8.636398927                 | 3.609075276  |
|                                                     | C32  | 6.853785125   | -8.449848522                 | 4.813998441  |
|                                                     | C33  | 4.671559099   | -7.733507105                 | 3.724490112  |
|                                                     | C34  | 5.034271058   | -6.251375409                 | 3.750617482  |
|                                                     | C35  | 3.810509244   | -5.349127257                 | 3.603440016  |
|                                                     | C36  | 3.849319269   | -2.885776787                 | 4.109525233  |
|                                                     | C37  | 9.001942957   | -7.529340047                 | 5.556561746  |
|                                                     | C38  | 9.142894034   | -6.061478547                 | 5.892542010  |
|                                                     | C39  | -4.638253877  | -2.186078614                 | -3.456339744 |
|                                                     | C40  | -5.168312265  | -0.875284906                 | -2.845660681 |
|                                                     | C41  | -3.164981482  | -2.362148411                 | -3.017437925 |
|                                                     | C42  | -2.544529177  | -3.750768799                 | -3.271998864 |
|                                                     | C43  | -1.894930496  | -3.940158671                 | -4.642662237 |
|                                                     | C44  | -5.474144962  | 1.519286721                  | -3.354576367 |
|                                                     | C45  | -6.792535654  | 1.782248396                  | -2.613985202 |
|                                                     | C46  | -5.313974525  | 2.413624625                  | -4.592012419 |
|                                                     | C47  | -9.127965398  | 1.109622600                  | -2.294491227 |
|                                                     | C48  | -9.125119516  | 0.802556567                  | -0.793751534 |
|                                                     | C49  | -7.889364743  | -0.111374845                 | 1.115908868  |
|                                                     | C50  | -6.841251629  | 0.748596958                  | 1.824348789  |
|                                                     | C51  | -5.201680157  | 2.560080974                  | 1.712205602  |
|                                                     | C52  | -5.853551464  | 3.695036576                  | 2.538153790  |
|                                                     | C53  | -4.303025431  | 3.265064169                  | 0.685624835  |
|                                                     | C54  | -3.459086314  | 2.395376120                  | -0.183148352 |
|                                                     | C55  | -3.091615527  | 1.073963967                  | -0.140738087 |
|                                                     | C56  | -2.144407692  | 1.981673294                  | -1.943621519 |
|                                                     | C57  | -7.686510110  | 5.343422431                  | 2.544205405  |
|                                                     | C58  | -7.971762424  | 5.201838787                  | 4.036246801  |
|                                                     | C59  | -9.006101942  | 5.516429647                  | 1.753187776  |
|                                                     | C60  | -9.618392054  | 6.885430470                  | 1.754404780  |
|                                                     | C61  | -9.796386024  | 7.802453117                  | 2.772412053  |
|                                                     | C62  | -10.625868179 | 8.587565536                  | 0.873559198  |
|                                                     | C63  | 7.988100576   | 0.737426305                  | 5.977329492  |
|                                                     | C64  | 9.072646574   | -0.311889603                 | 5.826326294  |
|                                                     | C65  | 6.718647117   | 0.162522344                  | 5.296000261  |
|                                                     | C66  | 5.522352636   | 1.077838198                  | 5.399647806  |
|                                                     | C67  | 4.643954055   | 1.012006665                  | 6.496850612  |

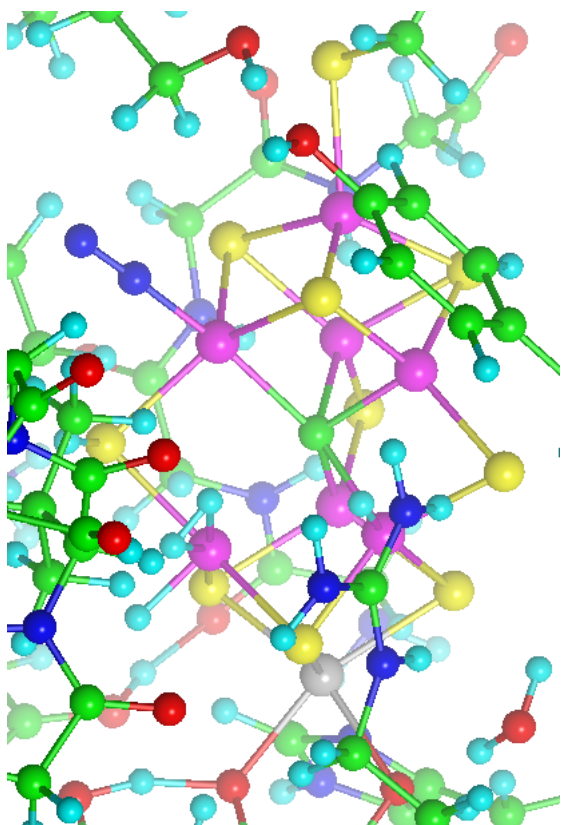

|       |              |              |               |
|-------|--------------|--------------|---------------|
| C68   | 5.256047014  | 2.030043618  | 4.400513504   |
| C69   | 3.531970936  | 1.856712895  | 6.590275707   |
| C70   | 4.160671229  | 2.889279309  | 4.487726830   |
| C71   | 3.296237165  | 2.798936035  | 5.582250861   |
| C72   | 5.278741850  | 6.907860046  | 1.523523508   |
| C73   | 4.270838717  | 8.042474295  | 1.277521409   |
| C74   | 4.594769981  | 5.544272914  | 1.412270773   |
| C75   | 3.662775130  | 9.943059879  | -0.177613342  |
| C76   | 2.289563255  | 9.638180600  | -0.783247514  |
| C77   | 0.785575763  | 7.807635937  | -1.559938460  |
| C78   | -0.021934297 | 7.158637831  | -0.407135108  |
| C79   | 1.109600691  | 6.798760911  | -2.687451547  |
| C80   | -0.024213448 | 5.979271769  | -3.315114878  |
| C81   | -0.935235445 | 6.707108806  | -4.316687860  |
| C82   | -2.599182309 | 8.507156060  | -3.858190948  |
| C83   | -0.047423560 | 5.766095572  | 1.602920538   |
| C84   | -0.491657888 | 6.765680623  | 2.681271157   |
| C85   | 0.777068576  | 4.664359636  | 2.298336347   |
| C86   | 0.271721793  | 8.607850029  | 4.099449000   |
| C87   | -0.327611042 | 9.994697345  | 3.928240025   |
| C88   | -1.320978264 | 11.597308920 | 2.385160102   |
| C89   | -2.749124906 | 12.025305021 | 2.806745510   |
| C90   | -1.068326826 | 11.938914696 | 0.913877311   |
| C91   | -2.010357616 | 11.236575783 | -0.056837662  |
| C92   | -4.975395221 | 11.285857469 | 3.527021105   |
| C93   | -5.212686421 | 12.139456020 | 4.766508523   |
| C94   | -5.703706032 | 9.920368631  | 3.672641829   |
| C95   | -5.628365061 | 9.097389760  | 2.405492979   |
| C96   | -6.579803509 | 9.271444259  | 1.389335887   |
| C97   | -4.583181720 | 8.184970314  | 2.184196532   |
| C98   | -6.476796467 | 8.585472107  | 0.177693248   |
| C99   | -4.444048644 | 7.514810435  | 0.964143829   |
| C100  | -5.395906883 | 7.726502652  | -0.028009418  |
| C101  | 6.443593110  | -2.053077570 | -8.222367613  |
| C102  | 4.937428096  | -1.891055809 | -8.105127864  |
| C103  | 3.128955284  | -0.655429365 | -6.933956969  |
| C104  | 2.732806923  | 0.789345637  | -7.263714979  |
| C105  | 3.039276753  | 3.141408968  | -6.625655174  |
| C106  | 4.188367887  | 4.093332930  | -6.306505512  |
| C107  | 6.248256398  | 4.588167269  | -5.117477516  |
| C108  | 7.120055824  | 5.076958570  | -6.258710019  |
| C109  | -0.130083791 | -1.420868868 | -10.082611714 |
| C110  | -1.244534397 | -0.399839487 | -9.826277319  |
| C111  | 0.017921859  | -2.363477051 | -8.865650251  |
| C112  | 0.841911684  | -3.611645292 | -9.231280291  |
| C113  | 1.192062073  | -4.408066482 | -7.993838703  |
| C114  | -1.889792671 | 1.734674236  | -8.824096892  |
| C115  | -1.292707517 | 3.111079763  | -9.039473546  |
| C116  | -2.652644406 | 1.565734696  | -7.486340910  |
| C117  | -1.693068386 | 1.362122634  | -6.348722005  |
| C118  | -1.090267822 | 2.456786266  | -5.708543252  |
| C119  | -1.260681063 | 0.063435050  | -6.025032643  |
| C120  | -0.024560250 | 2.258257014  | -4.824287899  |
| C121  | -0.194780389 | -0.134055331 | -5.144115173  |
| C122  | 0.449165711  | 0.968261599  | -4.572405895  |
| C123  | 9.117813128  | -5.226605731 | -3.737497367  |
| C124  | 10.013273336 | -5.530096094 | -2.523988549  |
| C125  | 7.673277089  | -5.661430254 | -3.451829506  |
| C126  | 6.640070162  | -5.260370052 | -4.455533888  |
| C127  | 6.608874612  | -5.572241795 | -5.799448006  |
| C128  | 4.692190874  | -4.623454936 | -5.225586623  |
| C129  | 10.786915842 | -7.101496491 | -0.849481651  |
| C130  | 12.246534370 | -6.757911308 | -1.050793652  |
| C131  | 0.894257311  | -6.724204895 | -1.432523979  |
| C132  | 2.259317310  | -6.866217561 | -0.764936276  |
| C133  | 3.467158742  | -6.730182023 | -1.737921369  |
| C134  | 3.582771042  | -8.007516426 | -2.612577172  |
| C135  | 4.876640875  | -8.137497272 | -3.420882835  |
| C136  | 5.053777257  | -9.513935667 | -4.098935137  |
| C137  | 4.767739385  | -6.599166178 | -0.929696655  |
| C138  | 4.055110454  | -0.271899655 | -1.296029679  |
| Fe139 | 4.759893021  | -1.241968855 | -2.851598427  |
| Fe140 | 2.386565163  | 0.978632117  | -0.806864214  |
| Fe141 | 5.263285489  | 0.668025331  | 0.005582633   |
| Fe142 | 4.616843705  | 1.235947291  | -2.425327221  |
| Fe143 | 4.131850273  | 2.994575627  | -0.499897818  |
| Fe144 | 4.959507365  | -1.787431740 | -0.386278847  |
| Fe145 | 2.471032830  | -2.110816041 | -1.143393643  |
| H146  | -5.879332952 | -7.295406498 | -2.895575926  |
| H147  | -5.774053045 | -6.047328468 | -3.940690780  |
| H148  | -9.541846382 | -4.850950745 | -2.235741951  |
| H149  | -8.150568437 | -5.754825792 | -3.972924951  |

|      |               |              |               |
|------|---------------|--------------|---------------|
| H150 | -8.309986650  | -7.154492988 | -2.916992468  |
| H151 | -8.073067886  | -2.993842799 | -0.708544605  |
| H152 | -9.143000042  | -6.212477464 | 0.306057613   |
| H153 | -9.801968965  | -3.350967717 | -0.518484004  |
| H154 | -8.895900735  | -7.302734793 | 2.341927782   |
| H155 | -6.461547629  | -6.370995667 | 0.691322138   |
| H156 | -8.947720687  | -5.730270166 | 3.165761089   |
| H157 | -3.552557579  | -2.298934825 | 1.951825024   |
| H158 | -5.457986337  | -4.170388010 | 0.903017753   |
| H159 | -4.158663818  | -6.661901416 | 0.952178758   |
| H160 | -6.512684187  | -1.545107613 | 5.538553671   |
| H161 | -6.810518901  | -3.283138442 | 3.255660258   |
| H162 | -4.381674986  | -7.101072379 | 2.660796508   |
| H163 | -5.203155742  | -1.953449910 | 1.383861632   |
| H164 | -5.944111840  | -5.105194983 | 5.238854376   |
| H165 | -7.672113662  | -2.893756619 | 5.373852729   |
| H166 | -1.078871636  | -3.910404522 | 2.561422807   |
| H167 | -1.035632058  | -2.521211930 | 1.454949707   |
| H168 | 0.409769662   | -2.940945143 | 2.398152406   |
| H169 | -2.253390178  | -1.898380986 | 3.544741717   |
| H170 | -5.557177949  | -6.559247718 | 7.019707170   |
| H171 | -3.300520419  | 0.902681966  | 4.948891780   |
| H172 | -3.806638457  | -2.193990210 | 8.241391795   |
| H173 | -4.261211705  | 1.109527956  | 9.199003461   |
| H174 | 0.473219831   | -0.537531327 | 3.171132357   |
| H175 | -0.833942201  | 0.130910287  | 4.180360409   |
| H176 | 7.776805383   | 0.848128744  | 7.057746355   |
| H177 | -4.397460503  | 2.133907578  | 5.597646604   |
| H178 | -4.924533762  | 2.262862154  | 8.017763983   |
| H179 | -2.652908082  | 2.246707873  | 5.932747414   |
| H180 | -3.209628917  | 2.356474501  | 8.486588834   |
| H181 | -4.526241584  | 0.029435174  | 6.962472843   |
| H182 | -1.547958380  | 0.572088877  | 7.433832527   |
| H183 | -2.952253647  | -1.313135875 | 5.716672634   |
| H184 | -1.085946941  | -0.097936380 | 2.441145705   |
| H185 | 1.282904181   | 4.059567869  | 1.531395838   |
| H186 | 0.061880087   | 4.023249663  | 2.833528727   |
| H187 | 1.763856377   | 4.657908281  | 4.004578057   |
| H188 | 1.647326477   | 3.449357101  | 6.375124684   |
| H189 | 3.956442414   | 3.609602278  | 3.695934693   |
| H190 | 5.900910686   | 2.081126462  | 3.520209961   |
| H191 | 4.818545192   | 0.278088298  | 7.288906799   |
| H192 | -2.397728536  | -3.918313389 | 5.022462109   |
| H193 | -1.318671059  | -6.899930687 | 4.941893561   |
| H194 | -1.131490967  | -6.644675995 | 6.690375694   |
| H195 | -3.476031215  | -5.823783270 | 5.045621699   |
| H196 | -5.288381902  | -5.173718436 | 8.108092906   |
| H197 | 2.848405701   | 1.777097230  | 7.440196035   |
| H198 | 0.314166817   | -2.738376381 | 4.929366489   |
| H199 | -3.867940521  | -1.830294048 | 11.002309890  |
| H200 | -3.823854006  | -3.416377152 | 10.185528350  |
| H201 | -1.116565846  | -2.933588863 | 10.176450274  |
| H202 | 9.984134854   | -7.935261763 | 5.270048529   |
| H203 | -0.388022268  | -4.954571285 | -5.583749516  |
| H204 | 1.886644090   | -5.556238423 | -2.608611150  |
| H205 | 0.246005331   | -4.255130500 | -9.894300718  |
| H206 | 1.757279674   | -3.319048118 | -9.765489069  |
| H207 | -0.971608617  | -2.681543608 | -8.503092189  |
| H208 | -0.453895090  | 3.138777299  | -9.773793096  |
| H209 | -0.514337982  | -2.021211129 | -10.921779606 |
| H210 | -2.555038036  | -1.588536880 | -3.514091902  |
| H211 | -3.314315150  | -4.534058983 | -3.163846683  |
| H212 | 0.050256985   | 0.816572347  | -8.748461978  |
| H213 | -2.638986628  | 1.638824893  | -9.637109114  |
| H214 | 1.602187170   | -0.313491411 | -9.781334081  |
| H215 | -0.421992869  | -5.181827200 | -3.837712739  |
| H216 | 0.492103038   | -1.808983302 | -8.040826670  |
| H217 | 1.723703614   | -1.449219548 | -10.968732283 |
| H218 | -5.626674478  | -2.639080526 | -5.210439408  |
| H219 | -3.131676598  | -2.177453427 | -1.932830030  |
| H220 | 2.973832227   | -3.579767942 | -8.036435884  |
| H221 | -1.799357178  | -3.958968477 | -2.490443321  |
| H222 | -4.602277393  | 1.972543300  | 2.421686608   |
| H223 | -3.337687636  | 0.284580728  | 0.558575333   |
| H224 | -8.853454592  | 0.088213541  | 1.603115249   |
| H225 | -7.286353475  | -0.156862050 | -0.929340597  |
| H226 | -7.474094260  | 3.627839962  | 1.281716249   |
| H227 | -9.511465339  | 7.797328447  | 3.818669929   |
| H228 | -8.225290498  | 4.160943958  | 4.351894731   |
| H229 | -9.731042280  | 4.757403004  | 2.097999997   |
| H230 | -7.031241794  | 6.215418065  | 2.391368687   |
| H231 | -11.114204809 | 9.273782733  | 0.186440550   |

|      |               |               |              |
|------|---------------|---------------|--------------|
| H232 | -3.646943046  | 3.946126960   | 1.250771936  |
| H233 | -4.931554702  | 3.893623649   | 0.034359233  |
| H234 | -10.712097502 | 9.732497900   | 2.666437127  |
| H235 | -8.791457108  | 5.275679289   | 0.699646481  |
| H236 | -6.416427272  | 1.827045682   | 0.090873896  |
| H237 | -7.645402217  | -1.165487530  | 1.314792652  |
| H238 | -9.530214983  | 2.126445148   | -2.400709627 |
| H239 | -1.563009856  | 2.092467118   | -2.855502389 |
| H240 | -9.828286534  | 0.421626802   | -2.785636418 |
| H241 | 9.125805684   | 2.439913120   | 5.887585257  |
| H242 | 7.632483498   | 2.616656545   | 5.247826428  |
| H243 | 1.641262049   | 6.107779410   | 0.305796988  |
| H244 | -0.969105586  | 5.308134332   | 1.215277334  |
| H245 | 1.272511887   | 7.782975981   | 2.429940918  |
| H246 | -3.055301769  | 3.889067699   | -1.694655202 |
| H247 | -4.364265894  | 4.765431772   | -3.106364244 |
| H248 | -5.530019796  | 4.324833314   | -4.985710707 |
| H249 | -4.356793469  | 5.783043343   | -1.879733924 |
| H250 | -4.353963780  | 2.165518453   | -5.073934925 |
| H251 | -6.130897377  | 2.220512347   | -5.304049979 |
| H252 | -0.013674680  | 11.754925524  | 0.664903814  |
| H253 | -1.249742075  | 13.019483845  | 0.802911070  |
| H254 | -0.400706984  | 10.679245461  | -1.241973799 |
| H255 | -2.009748842  | 10.200742725  | -1.787812488 |
| H256 | -2.380739426  | 10.317602514  | -4.790431412 |
| H257 | -1.254959450  | 6.009130237   | -5.105628322 |
| H258 | -7.231336286  | 8.722901915   | -0.600439597 |
| H259 | -3.848337204  | 7.979881922   | 2.967550613  |
| H260 | -4.040667552  | 8.334175777   | -2.392321267 |
| H261 | 1.842029672   | 6.082712911   | -2.280113396 |
| H262 | 2.815261040   | 7.676016276   | -0.920271607 |
| H263 | -0.633713692  | 5.486900744   | -2.540678043 |
| H264 | -7.687739513  | 0.263704217   | -3.645939245 |
| H265 | 4.209287824   | 10.572811483  | -0.892019968 |
| H266 | -5.033829740  | -0.170694282  | -4.705390195 |
| H267 | 1.631748776   | 7.356465245   | -3.482543530 |
| H268 | -3.586287609  | 6.864519968   | 0.790310734  |
| H269 | 3.475438149   | 10.544273697  | 0.723853730  |
| H270 | -1.470041786  | 9.031611775   | -5.496680326 |
| H271 | -4.174201405  | 9.735217835   | -3.405046762 |
| H272 | -3.960335484  | -2.621787978  | -5.351024584 |
| H273 | -5.224567407  | -2.991874295  | -2.978084787 |
| H274 | -7.418062863  | 9.955664422   | 1.541276105  |
| H275 | -4.700609557  | 1.798133770   | -2.626061344 |
| H276 | 0.172546530   | 8.638119099   | -1.926776176 |
| H277 | -0.366065207  | 7.506840571   | -4.806716512 |
| H278 | 0.466373940   | 5.169638485   | -3.872948975 |
| H279 | -2.730183778  | 6.595390470   | -3.175637255 |
| H280 | -0.340330390  | 8.073006154   | 4.841558453  |
| H281 | -0.846801620  | 9.531786601   | 2.004728330  |
| H282 | -0.673409438  | 12.254331716  | 2.987712600  |
| H283 | 1.276578599   | 8.743397604   | 4.522314033  |
| H284 | -3.222774860  | 10.098263421  | 3.216128853  |
| H285 | 6.937188523   | -1.085398032  | -8.049007832 |
| H286 | 6.741033697   | -2.718366976  | -7.384448019 |
| H287 | 9.152435418   | -4.131437322  | -3.841195527 |
| H288 | 7.771095832   | -2.878856679  | -9.530799757 |
| H289 | 6.227702595   | -3.381007185  | -9.751894217 |
| H290 | 5.350297920   | 4.771304462   | 1.603581450  |
| H291 | 5.148234008   | 7.084782687   | 3.555812127  |
| H292 | 5.268414456   | 8.561495544   | -0.444296539 |
| H293 | 3.798640852   | 5.470334801   | 2.165409148  |
| H294 | 6.418729449   | 7.895398996   | 2.919226111  |
| H295 | 6.899198012   | 4.070687699   | -4.395703227 |
| H296 | 6.083931101   | 6.965019341   | 0.774377907  |
| H297 | 4.103812793   | -8.014943919  | 4.626400406  |
| H298 | 6.443144828   | -8.397193114  | 2.679433384  |
| H299 | 5.253223343   | 2.700864484   | -5.171906502 |
| H300 | 4.072664132   | -0.850988134  | 4.290627022  |
| H301 | 2.756023622   | 3.307723997   | -7.672812192 |
| H302 | 0.141380042   | -1.146860757  | -4.911238190 |
| H303 | 2.184891767   | 3.471548669   | -6.010039749 |
| H304 | 3.163096929   | -5.427011212  | 4.485339665  |
| H305 | 3.766790341   | 1.369070731   | -5.606149426 |
| H306 | 3.210037704   | -5.651016827  | 2.729475208  |
| H307 | 4.036217575   | -7.946379946  | 2.849894954  |
| H308 | 5.726102163   | -6.031514891  | 2.923629436  |
| H309 | 5.553832201   | -5.988251223  | 4.685615047  |
| H310 | -3.322567390  | 0.700417895   | -7.592447646 |
| H311 | 4.835603174   | -10.409441876 | 4.201457287  |
| H312 | 4.441012860   | -12.261813977 | 1.805483647  |
| H313 | 1.305368596   | 0.835975500   | -3.914308775 |

|       |              |               |              |
|-------|--------------|---------------|--------------|
| H314  | 5.066779687  | -12.899234972 | 4.585218699  |
| H315  | 3.666381183  | -13.097351813 | 3.759167256  |
| H316  | 4.934816337  | -3.818471155  | 2.681831924  |
| H317  | 0.464011191  | 3.104684336   | -4.338439137 |
| H318  | -1.745346915 | -0.801961204  | -6.482235277 |
| H319  | 8.185747106  | -9.481010718  | -1.643080989 |
| H320  | 7.640362818  | -6.761578622  | -3.367997770 |
| H321  | 6.746088693  | -8.079975241  | -0.069852693 |
| H322  | 7.659334622  | -9.821212128  | -3.065946724 |
| H323  | 7.128583007  | 4.420173033   | -7.161475512 |
| H324  | 6.417035368  | -5.006971472  | 0.388175323  |
| H325  | 2.298006117  | -7.819268092  | -0.223916483 |
| H326  | 5.217715064  | -0.445478617  | -6.681187513 |
| H327  | 3.503800614  | -8.864558951  | -1.925133886 |
| H328  | 5.008503391  | -5.298037715  | -7.199275223 |
| H329  | 3.678787213  | -4.252293251  | -5.313652091 |
| H330  | 5.925020849  | -13.008204668 | 2.407710653  |
| H331  | 5.079043519  | -1.565316682  | 3.062913794  |
| H332  | 8.090479545  | -5.974903568  | 1.741625808  |
| H333  | 7.134994314  | -3.771025412  | 0.986338336  |
| H334  | 8.199524612  | -7.454836966  | 3.566440343  |
| H335  | 2.322490444  | -3.787621231  | 5.208279989  |
| H336  | 4.895023067  | -7.374017095  | -4.213319127 |
| H337  | 5.749738454  | -7.957568432  | -2.779709592 |
| H338  | 2.711957352  | -8.050923774  | -3.284590354 |
| H339  | 2.966094225  | -0.865419642  | -5.864692454 |
| H340  | -1.429512331 | 3.467780235   | -5.943273474 |
| H341  | -3.269050488 | 2.465913865   | -7.345746415 |
| H342  | 2.309080172  | -6.057297140  | -0.016241685 |
| H343  | 8.342968675  | -7.433145798  | 1.258854641  |
| H344  | 7.336080689  | -9.312840061  | 0.644855838  |
| H345  | 2.651494838  | -2.137275721  | 5.593233890  |
| H346  | 7.339929424  | -6.066426721  | -6.429570137 |
| H347  | 7.375675228  | -5.278446842  | -2.470029858 |
| H348  | 2.505389978  | -1.323509059  | -7.531714109 |
| H349  | 5.808462322  | 5.459320205   | -4.608824801 |
| H350  | 6.498104612  | -0.807025356  | 5.765889583  |
| H351  | 6.955354682  | -0.023794733  | 4.235779498  |
| H352  | 10.590150621 | -5.471520636  | -5.143574085 |
| H353  | 9.707754872  | -6.827719118  | -4.896228970 |
| H354  | 10.730949031 | -8.189293331  | -0.685113798 |
| H355  | 9.381691104  | -7.528083117  | -2.393783092 |
| H356  | 12.582460564 | -6.752221460  | -2.116058196 |
| H357  | 10.411310530 | -6.610054890  | 0.061519106  |
| H358  | 9.603204643  | -0.282205204  | 4.844131410  |
| H359  | -4.362918788 | 12.174778355  | 5.488354309  |
| H360  | 8.678407679  | -8.042999276  | 6.478993142  |
| H361  | 8.233883052  | -5.440957427  | 5.695447331  |
| H362  | -5.400742527 | 11.831506224  | 2.668350091  |
| H363  | -5.261422322 | 9.368902574   | 4.517678171  |
| H364  | -6.751355062 | 10.131833631  | 3.931972517  |
| H365  | 1.433738367  | -3.191593610  | -1.221541486 |
| H366  | 4.325828992  | -1.434069137  | 0.919129766  |
| H367  | -6.068404803 | 7.131602714   | -1.758229273 |
| H368  | 0.121072019  | -0.644710788  | -0.687327910 |
| H369  | 2.130831498  | -1.488646958  | 0.332476034  |
| H370  | 1.624005841  | -2.180782432  | 0.209744904  |
| H371  | -1.820832123 | -0.026454457  | -1.478943957 |
| Mo372 | 4.472836895  | -3.841622819  | -2.106404691 |
| N373  | -6.377478110 | -6.821235889  | -3.652752397 |
| N374  | -8.753463550 | -4.789444594  | -1.595785447 |
| N375  | -8.760904984 | -5.661184065  | 1.070736547  |
| N376  | -6.116168804 | -6.470880262  | 1.647604280  |
| N377  | -4.804876956 | -3.966671293  | 1.656689239  |
| N378  | -6.171989339 | -2.857626514  | 3.933485845  |
| N379  | -5.569885589 | -4.691322949  | 6.097687558  |
| N380  | -2.941707681 | -5.982628500  | 5.903316398  |
| N381  | -1.396532321 | -3.827676578  | 5.173461608  |
| N382  | -2.190311037 | -1.095468715  | 6.365020764  |
| N383  | -3.184081557 | -1.855909487  | 8.979652318  |
| N384  | 4.448600271  | -12.456715276 | 3.901359475  |
| N385  | 5.496753054  | -10.025357799 | 3.518287904  |
| N386  | 4.238166181  | -3.960839442  | 3.417101326  |
| N387  | 2.937521842  | -2.977818827  | 5.099892960  |
| N388  | 4.402469253  | -1.693188206  | 3.829199706  |
| N389  | 8.005253851  | -7.787375923  | 4.536863074  |
| N390  | -4.776678481 | -2.154829117  | -4.915472522 |
| N391  | -0.837882571 | -4.771721341  | -4.680348615 |
| N392  | -5.290049336 | 0.132684427   | -3.750074756 |
| N393  | -7.840650871 | 1.000854163   | -2.960768593 |
| N394  | -8.053135528 | 0.117770680   | -0.306465698 |
| N395  | -6.173848302 | 1.679458954   | 1.075318602  |

|      |               |               |               |
|------|---------------|---------------|---------------|
| N396 | -2.855268377  | 2.926290771   | -1.315326115  |
| N397 | -2.287315712  | 0.849834431   | -1.241355925  |
| N398 | -7.044958067  | 4.130280654   | 2.055056541   |
| N399 | -10.140444653 | 7.388796123   | 0.572630421   |
| N400 | -10.435545128 | 8.877148370   | 2.191496327   |
| N401 | 8.422239547   | 1.968558088   | 5.313584194   |
| N402 | 5.894946583   | 7.017618640   | 2.856181487   |
| N403 | 4.480042098   | 8.791532595   | 0.155014712   |
| N404 | 2.059683611   | 8.346884862   | -1.097214165  |
| N405 | -2.140273235  | 7.267306615   | -3.697235117  |
| N406 | -2.021200979  | 9.371271039   | -4.715687526  |
| N407 | -3.607193624  | 8.957342396   | -3.078086079  |
| N408 | 0.664264317   | 6.395872967   | 0.490146524   |
| N409 | 0.357055310   | 7.812278153   | 2.888307012   |
| N410 | -0.949179508  | 10.237856450  | 2.733308358   |
| N411 | -1.422480508  | 10.785682517  | -1.197369751  |
| N412 | -3.553067581  | 11.055737485  | 3.309622246   |
| N413 | 6.801102464   | -2.556536473  | -9.551228022  |
| N414 | 4.522368792   | -0.915712321  | -7.269263266  |
| N415 | 3.276916171   | 1.719178378   | -6.446682070  |
| N416 | 5.224523229   | 3.650939657   | -5.550656464  |
| N417 | 1.093979330   | -0.759222409  | -10.554199914 |
| N418 | -0.904954570  | 0.706497891   | -9.102494337  |
| N419 | 9.635973840   | -5.809524643  | -4.987905839  |
| N420 | 5.431666924   | -4.654392898  | -4.115656560  |
| N421 | 5.377979076   | -5.158870933  | -6.261473466  |
| N422 | 9.988298766   | -6.793419107  | -2.020488168  |
| N423 | -0.004754966  | 2.299838620   | 0.333673647   |
| N424 | 0.923089145   | 1.814067775   | -0.096265233  |
| O425 | -6.560566051  | -5.276322843  | -1.233197273  |
| O426 | -8.045819287  | -3.602040200  | 1.743579971   |
| O427 | -6.609084534  | -6.376599685  | 3.873190401   |
| O428 | -3.427672059  | -4.820884565  | 3.263064660   |
| O429 | -4.288407244  | -1.630273657  | 4.263164512   |
| O430 | -5.506796427  | -2.829097560  | 7.431898827   |
| O431 | -2.937489013  | -5.999232811  | 8.196211090   |
| O432 | 0.556979802   | -4.975478567  | 5.574502643   |
| O433 | 0.042673764   | -1.256193434  | 6.817206527   |
| O434 | -1.799257042  | -0.237420570  | 9.761541232   |
| O435 | -1.763931015  | -2.874390402  | 12.111375972  |
| O436 | 6.662002307   | -10.657678320 | 1.623703473   |
| O437 | 6.542011069   | -8.874032388  | 5.940812248   |
| O438 | 10.156455033  | -5.570184378  | 6.363423209   |
| O439 | -5.435439370  | -0.744878716  | -1.634702777  |
| O440 | -2.339404985  | -3.378239771  | -5.670417515  |
| O441 | -6.858456856  | 2.659645264   | -1.735118306  |
| O442 | -5.334868753  | 3.798187948   | -4.190213911  |
| O443 | -10.080236526 | 1.174573637   | -0.100064061  |
| O444 | -6.624739041  | 0.582648872   | 3.029246175   |
| O445 | -5.272576278  | 4.214032654   | 3.494971472   |
| O446 | -7.981135541  | 6.132943754   | 4.823439481   |
| O447 | 9.344505984   | -1.149662981  | 6.674340026   |
| O448 | 2.212155812   | 3.655437294   | 5.607522764   |
| O449 | 3.331679056   | 8.280729923   | 2.056772407   |
| O450 | 1.478473386   | 10.568428067  | -0.957323116  |
| O451 | -1.247373402  | 7.344338154   | -0.333220477  |
| O452 | -1.520372168  | 6.572682858   | 3.342360385   |
| O453 | 1.734776001   | 5.218814463   | 3.202826642   |
| O454 | -0.260303025  | 10.831510125  | 4.836852823   |
| O455 | -3.091424233  | 13.213667101  | 2.731148079   |
| O456 | -3.227904568  | 11.145171811  | 0.158334558   |
| O457 | -6.264294008  | 12.721772145  | 4.977370137   |
| O458 | -5.221302003  | 7.086839338   | -1.273550049  |
| O459 | 4.159307557   | -2.650401419  | -8.731869790  |
| O460 | 1.982524835   | 1.066339819   | -8.221939437  |
| O461 | 4.119205174   | 5.267561755   | -6.705736238  |
| O462 | 7.795432406   | 6.091041065   | -6.197015318  |
| O463 | -2.400851443  | -0.585227723  | -10.240454711 |
| O464 | 0.405022784   | -5.162560259  | -7.431045565  |
| O465 | 2.424794299   | -4.216799598  | -7.481792458  |
| O466 | -1.706573961  | 4.133785188   | -8.511171659  |
| O467 | 10.767667849  | -4.664365666  | -2.039849374  |
| O468 | 13.033781086  | -6.578987801  | -0.131939918  |
| O469 | 0.855644803   | -5.868256883  | -2.460203459  |
| O470 | -0.111640200  | -7.306055348  | -1.027660229  |
| O471 | 6.218386604   | -10.044400807 | -4.048825694  |
| O472 | 4.046252723   | -10.008809124 | -4.678805955  |
| O473 | 5.502014813   | -5.541976591  | -1.169389062  |
| O474 | 5.097872157   | -7.485827176  | -0.120434916  |
| O475 | 3.268256748   | -5.551932374  | -2.521605874  |
| O476 | 8.617597166   | -6.780591167  | 1.961078004   |
| O477 | 6.819673085   | -4.663903995  | 1.225952262   |



|                                                      |      |               |                               |              |
|------------------------------------------------------|------|---------------|-------------------------------|--------------|
|                                                      | O478 | -3.769587781  | 5.251579394                   | -2.474069616 |
|                                                      | O479 | 8.500588172   | -9.794289135                  | -2.520051442 |
|                                                      | O480 | 7.611375204   | -8.545151501                  | 0.081789557  |
|                                                      | S481 | 3.831923948   | 5.249440714                   | -0.251949144 |
|                                                      | S482 | 2.815132181   | 2.583414705                   | -2.322344972 |
|                                                      | S483 | 2.945658717   | -2.525723082                  | -3.338742330 |
|                                                      | S484 | 3.535891657   | 1.614021050                   | 1.133712627  |
|                                                      | S485 | 0.935938181   | -0.573472943                  | -1.769152033 |
|                                                      | S486 | 5.397091312   | 0.308575291                   | -4.291222144 |
|                                                      | S487 | 3.703727333   | -3.532387693                  | 0.059165443  |
|                                                      | S488 | 6.213545381   | 2.289819518                   | -1.159877052 |
|                                                      | S489 | 6.410278971   | -2.475830063                  | -2.001292384 |
|                                                      | S490 | 6.465491272   | -0.844338385                  | 1.043332584  |
|                                                      | end  |               |                               |              |
| <b>pre-capture<br/>2N2 dissociated<br/>35, S=1/2</b> |      |               | <b>precapt2n2x1 dtg.car_3</b> |              |
| <b>Fe( 139) -2.580</b>                               | C1   | -7.556622263  | -5.397754873                  | -1.924134747 |
| <b>Fe( 140) -0.669</b>                               | C2   | -7.615532984  | -6.298475917                  | -3.162587880 |
| <b>Fe( 141) -2.360</b>                               | C3   | -8.791644655  | -3.798686301                  | -0.528596197 |
| <b>Fe( 142) 2.720</b>                                | C4   | -8.502854632  | -4.351624322                  | 0.863470478  |
| <b>Fe( 143) 2.796</b>                                | C5   | -8.473336978  | -6.296141213                  | 2.346305718  |
| <b>Fe( 144) 0.860</b>                                | C6   | -6.983236442  | -6.382987898                  | 2.688573653  |
| <b>Fe( 145) 0.094</b>                                | C7   | -4.679184941  | -6.394341041                  | 1.881942688  |
|                                                      | C8   | -4.236664507  | -4.997512785                  | 2.332918761  |
|                                                      | C9   | -4.609471319  | -2.587073173                  | 2.063983794  |
|                                                      | C10  | -5.007228413  | -2.318396186                  | 3.523047183  |
|                                                      | C11  | -6.616427062  | -2.619754888                  | 5.301653188  |
|                                                      | C12  | -5.831414869  | -3.394346879                  | 6.370720268  |
|                                                      | C13  | -5.052058260  | -5.597185024                  | 7.123909049  |
|                                                      | C14  | -3.538196488  | -5.853060218                  | 7.123279127  |
|                                                      | C15  | -1.510243828  | -6.170507637                  | 5.760749396  |
|                                                      | C16  | -0.680264747  | -4.914058923                  | 5.486238447  |
|                                                      | C17  | -0.749387466  | -2.519470977                  | 4.909942402  |
|                                                      | C18  | -0.923734561  | -1.555143444                  | 6.100831528  |
|                                                      | C19  | -1.139888916  | -1.933874384                  | 3.532045490  |
|                                                      | C20  | -0.580904772  | -0.525665291                  | 3.315719078  |
|                                                      | C21  | -0.687215255  | -2.873039484                  | 2.410098422  |
|                                                      | C22  | -2.407775706  | -0.093311007                  | 7.398063868  |
|                                                      | C23  | -2.422036097  | -0.737760620                  | 8.797724428  |
|                                                      | C24  | -3.681632183  | 0.734946434                   | 7.099438658  |
|                                                      | C25  | -4.035317638  | 1.657221027                   | 8.271448695  |
|                                                      | C26  | -3.499117496  | 1.550903626                   | 5.812687831  |
|                                                      | C27  | -3.275802504  | -2.467904232                  | 10.265678987 |
|                                                      | C28  | -1.924110371  | -2.759375921                  | 10.888694235 |
|                                                      | C29  | 5.158260116   | -12.240139729                 | 2.624635331  |
|                                                      | C30  | 5.858318761   | -10.888119313                 | 2.544785779  |
|                                                      | C31  | 5.916059869   | -8.638522470                  | 3.608658620  |
|                                                      | C32  | 6.858244456   | -8.453520045                  | 4.813356650  |
|                                                      | C33  | 4.677524819   | -7.732938828                  | 3.726270718  |
|                                                      | C34  | 5.043822717   | -6.251500989                  | 3.749803740  |
|                                                      | C35  | 3.822854816   | -5.345663489                  | 3.603273116  |
|                                                      | C36  | 3.864967779   | -2.879613725                  | 4.092612602  |
|                                                      | C37  | 9.004242303   | -7.527613045                  | 5.556166561  |
|                                                      | C38  | 9.142945157   | -6.059656364                  | 5.891093405  |
|                                                      | C39  | -4.611753068  | -2.176134295                  | -3.451834991 |
|                                                      | C40  | -5.147904017  | -0.866312490                  | -2.844016525 |
|                                                      | C41  | -3.139973219  | -2.356059636                  | -3.014759703 |
|                                                      | C42  | -2.527761695  | -3.748447723                  | -3.270053452 |
|                                                      | C43  | -1.880932187  | -3.942080989                  | -4.641633757 |
|                                                      | C44  | -5.475351088  | 1.522883589                   | -3.361169428 |
|                                                      | C45  | -6.794032348  | 1.783043427                   | -2.620499465 |
|                                                      | C46  | -5.316261526  | 2.417861892                   | -4.598733864 |
|                                                      | C47  | -9.127471221  | 1.110097580                   | -2.297963718 |
|                                                      | C48  | -9.125125587  | 0.801585275                   | -0.797535607 |
|                                                      | C49  | -7.890779810  | -0.119555774                  | 1.110858019  |
|                                                      | C50  | -6.838025372  | 0.734159849                   | 1.817470470  |
|                                                      | C51  | -5.195621370  | 2.541113274                   | 1.699120943  |
|                                                      | C52  | -5.836430738  | 3.677888238                   | 2.528600377  |
|                                                      | C53  | -4.309030356  | 3.243436241                   | 0.660963181  |
|                                                      | C54  | -3.484815927  | 2.367402548                   | -0.222733876 |
|                                                      | C55  | -3.118487801  | 1.043636958                   | -0.184505390 |
|                                                      | C56  | -2.167121035  | 1.955461521                   | -1.981251246 |
|                                                      | C57  | -7.654031911  | 5.339264020                   | 2.533865163  |
|                                                      | C58  | -7.934759069  | 5.204419825                   | 4.028565244  |
|                                                      | C59  | -8.981067290  | 5.514228959                   | 1.755208232  |
|                                                      | C60  | -9.595364750  | 6.883065850                   | 1.756740026  |
|                                                      | C61  | -9.781089090  | 7.797940690                   | 2.775741533  |
|                                                      | C62  | -10.610410975 | 8.581252175                   | 0.876020155  |
|                                                      | C63  | 7.991396222   | 0.739630655                   | 5.974254313  |
|                                                      | C64  | 9.078596905   | -0.307069473                  | 5.823018895  |
|                                                      | C65  | 6.724016221   | 0.161247245                   | 5.290979578  |
|                                                      | C66  | 5.525962060   | 1.074569771                   | 5.392364152  |

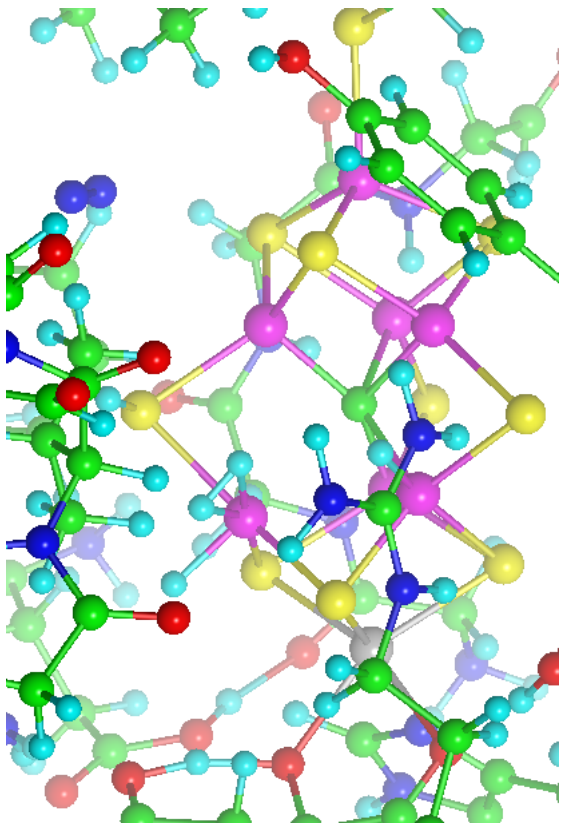

|       |              |              |               |
|-------|--------------|--------------|---------------|
| C67   | 4.648809251  | 1.011832776  | 6.490507000   |
| C68   | 5.256991319  | 2.022236623  | 4.389201271   |
| C69   | 3.535601339  | 1.854855185  | 6.581788259   |
| C70   | 4.159146596  | 2.878833571  | 4.473328653   |
| C71   | 3.297780559  | 2.792984701  | 5.570737775   |
| C72   | 5.273770246  | 6.912492552  | 1.520440330   |
| C73   | 4.270244687  | 8.050888187  | 1.276698804   |
| C74   | 4.583582053  | 5.550939030  | 1.409681656   |
| C75   | 3.660878907  | 9.945594554  | -0.185406283  |
| C76   | 2.288521807  | 9.637856556  | -0.790728518  |
| C77   | 0.787654458  | 7.800193444  | -1.557990216  |
| C78   | -0.014849940 | 7.149679018  | -0.400911549  |
| C79   | 1.114072487  | 6.791934872  | -2.687147622  |
| C80   | -0.016897817 | 5.969801405  | -3.316777530  |
| C81   | -0.927698311 | 6.697742753  | -4.317684505  |
| C82   | -2.591653529 | 8.497893276  | -3.857788160  |
| C83   | -0.016125703 | 5.775944050  | 1.623596359   |
| C84   | -0.476241569 | 6.778703371  | 2.691124515   |
| C85   | 0.834125823  | 4.700232296  | 2.333684564   |
| C86   | 0.281169236  | 8.616499873  | 4.114395383   |
| C87   | -0.322320685 | 9.999369240  | 3.935895781   |
| C88   | -1.308990128 | 11.587961266 | 2.379033819   |
| C89   | -2.737506685 | 12.010860872 | 2.803341579   |
| C90   | -1.059271174 | 11.929279028 | 0.907860342   |
| C91   | -2.005294104 | 11.231984014 | -0.061918630  |
| C92   | -4.962615438 | 11.268549775 | 3.520886831   |
| C93   | -5.202181013 | 12.126705310 | 4.756650577   |
| C94   | -5.694582186 | 9.905224251  | 3.666148119   |
| C95   | -5.619248827 | 9.083091341  | 2.399021047   |
| C96   | -6.570612537 | 9.256562982  | 1.382846877   |
| C97   | -4.573241621 | 8.171650504  | 2.178710427   |
| C98   | -6.465642878 | 8.572277463  | 0.170239327   |
| C99   | -4.431948842 | 7.502649681  | 0.958470290   |
| C100  | -5.384028867 | 7.713566158  | -0.033560876  |
| C101  | 6.448883140  | -2.057196515 | -8.249552418  |
| C102  | 4.943601541  | -1.893535425 | -8.117315358  |
| C103  | 3.146231036  | -0.663967164 | -6.924683948  |
| C104  | 2.750315230  | 0.781276560  | -7.251151433  |
| C105  | 3.048452036  | 3.132910818  | -6.614996361  |
| C106  | 4.193934463  | 4.092529913  | -6.306804870  |
| C107  | 6.260976544  | 4.602585725  | -5.136829078  |
| C108  | 7.125193376  | 5.090483276  | -6.283858865  |
| C109  | -0.126109009 | -1.420716617 | -10.087569992 |
| C110  | -1.238783108 | -0.397161796 | -9.831038490  |
| C111  | 0.020548708  | -2.363449298 | -8.870000740  |
| C112  | 0.843559454  | -3.612291716 | -9.233739086  |
| C113  | 1.193769997  | -4.408028456 | -7.996541800  |
| C114  | -1.881107381 | 1.736737321  | -8.824781782  |
| C115  | -1.281361184 | 3.112478679  | -9.036810721  |
| C116  | -2.644207346 | 1.565494120  | -7.487721370  |
| C117  | -1.688869053 | 1.351500064  | -6.347544533  |
| C118  | -1.078741388 | 2.440140432  | -5.702856969  |
| C119  | -1.269161147 | 0.049472100  | -6.021791218  |
| C120  | -0.027560934 | 2.231375250  | -4.803650157  |
| C121  | -0.215537928 | -0.158628643 | -5.127318913  |
| C122  | 0.428258314  | 0.935250551  | -4.540801511  |
| C123  | 9.117160868  | -5.231248793 | -3.733023060  |
| C124  | 10.013593313 | -5.538753730 | -2.520683802  |
| C125  | 7.668740938  | -5.652996949 | -3.444137794  |
| C126  | 6.634985462  | -5.253262541 | -4.450158832  |
| C127  | 6.605610641  | -5.567327807 | -5.794282412  |
| C128  | 4.687056760  | -4.620291318 | -5.223549343  |
| C129  | 10.798763938 | -7.117493690 | -0.858713721  |
| C130  | 12.256383497 | -6.765523953 | -1.061877180  |
| C131  | 0.883003098  | -6.725310744 | -1.426673012  |
| C132  | 2.252736334  | -6.872692485 | -0.765641257  |
| C133  | 3.456691757  | -6.734281257 | -1.742989955  |
| C134  | 3.577479354  | -8.014037108 | -2.613868127  |
| C135  | 4.871891423  | -8.142055700 | -3.421026170  |
| C136  | 5.053877956  | -9.517310028 | -4.101382789  |
| C137  | 4.755720090  | -6.589408163 | -0.934672933  |
| C138  | 4.088750302  | -0.267179239 | -1.315779249  |
| Fe139 | 4.756405536  | -1.247720488 | -2.891014329  |
| Fe140 | 2.618828066  | 0.807441967  | -0.939310701  |
| Fe141 | 5.016385759  | 0.698891954  | 0.131660386   |
| Fe142 | 4.715318362  | 1.275370133  | -2.414370041  |
| Fe143 | 3.944516781  | 3.001540452  | -0.453712075  |
| Fe144 | 4.897971883  | -1.783571890 | -0.370021339  |
| Fe145 | 2.390028544  | -2.088355144 | -1.115001152  |
| H146  | -5.854499910 | -7.293430234 | -2.890869608  |
| H147  | -5.741812810 | -6.045193651 | -3.936836534  |
| H148  | -9.518924931 | -4.854529700 | -2.236075066  |

|      |              |              |               |
|------|--------------|--------------|---------------|
| H149 | -8.118427104 | -5.744536207 | -3.971607869  |
| H150 | -8.282323133 | -7.142215029 | -2.913074089  |
| H151 | -8.068412714 | -2.987182860 | -0.698363856  |
| H152 | -9.133613862 | -6.215319206 | 0.299854517   |
| H153 | -9.796590513 | -3.356848024 | -0.521652346  |
| H154 | -8.896001367 | -7.309057219 | 2.336799437   |
| H155 | -6.460839889 | -6.377936134 | 0.692627145   |
| H156 | -8.950125351 | -5.737646176 | 3.162650619   |
| H157 | -3.555485553 | -2.302055510 | 1.956919774   |
| H158 | -5.457693514 | -4.172239086 | 0.902057314   |
| H159 | -4.158777981 | -6.665467968 | 0.953351526   |
| H160 | -6.517149567 | -1.554095331 | 5.546264430   |
| H161 | -6.811803811 | -3.285817276 | 3.259570478   |
| H162 | -4.381428490 | -7.103061849 | 2.663644205   |
| H163 | -5.206864265 | -1.954475517 | 1.394252092   |
| H164 | -5.955412226 | -5.117638903 | 5.244675634   |
| H165 | -7.675785603 | -2.901803457 | 5.376832659   |
| H166 | -1.084505999 | -3.888421898 | 2.533151690   |
| H167 | -1.024866025 | -2.502474726 | 1.429455737   |
| H168 | 0.411234283  | -2.938742101 | 2.378803351   |
| H169 | -2.235804312 | -1.862114489 | 3.519975085   |
| H170 | -5.551379106 | -6.572050927 | 7.018851929   |
| H171 | -3.306589364 | 0.912409754  | 4.940123580   |
| H172 | -3.782583050 | -2.201167673 | 8.211490168   |
| H173 | -4.255101549 | 1.099457969  | 9.192489401   |
| H174 | 0.513112125  | -0.533630822 | 3.196636210   |
| H175 | -0.821919623 | 0.155007709  | 4.143575896   |
| H176 | 7.777504938  | 0.847443416  | 7.054265306   |
| H177 | -4.403190105 | 2.138942546  | 5.598325284   |
| H178 | -4.921671478 | 2.255994792  | 8.016431398   |
| H179 | -2.657899104 | 2.254860034  | 5.925176359   |
| H180 | -3.207850734 | 2.352130294  | 8.485253653   |
| H181 | -4.516289489 | 0.025777977  | 6.952661013   |
| H182 | -1.540493320 | 0.585035834  | 7.420905751   |
| H183 | -2.939966366 | -1.304835636 | 5.697358840   |
| H184 | -1.014370048 | -0.085760153 | 2.404079346   |
| H185 | 1.375713950  | 4.107792237  | 1.579079464   |
| H186 | 0.133029909  | 4.037231027  | 2.860782618   |
| H187 | 1.803091362  | 4.706842706  | 4.047324549   |
| H188 | 1.651984013  | 3.450505992  | 6.366949451   |
| H189 | 3.952418722  | 3.594855628  | 3.677949330   |
| H190 | 5.901818105  | 2.071481637  | 3.508410227   |
| H191 | 4.827694985  | 0.283505210  | 7.286504662   |
| H192 | -2.387553429 | -3.894218041 | 5.001503606   |
| H193 | -1.321959623 | -6.878883377 | 4.940599707   |
| H194 | -1.130184719 | -6.618413752 | 6.687868516   |
| H195 | -3.477567842 | -5.800536575 | 5.048169960   |
| H196 | -5.294946065 | -5.187111323 | 8.111854672   |
| H197 | 2.855629195  | 1.780817657  | 7.434761601   |
| H198 | 0.327131897  | -2.723172299 | 4.897742531   |
| H199 | -3.863865951 | -1.849278940 | 10.965543950  |
| H200 | -3.788686668 | -3.436313148 | 10.148987543  |
| H201 | -1.092694607 | -2.930221675 | 10.164870027  |
| H202 | 9.986838379  | -7.933936762 | 5.270309712   |
| H203 | -0.379581936 | -4.963301657 | -5.583550888  |
| H204 | 1.885710441  | -5.568652272 | -2.610779067  |
| H205 | 0.246916841  | -4.255541561 | -9.895887078  |
| H206 | 1.758702193  | -3.319910701 | -9.767633707  |
| H207 | -0.969279428 | -2.680552741 | -8.507135402  |
| H208 | -0.441222510 | 3.139936292  | -9.769486550  |
| H209 | -0.510369434 | -2.019935581 | -10.927741202 |
| H210 | -2.526958919 | -1.586727682 | -3.513556026  |
| H211 | -3.303459848 | -4.526307890 | -3.162397169  |
| H212 | 0.056293741  | 0.813757448  | -8.745885641  |
| H213 | -2.629769779 | 1.641876579  | -9.638928107  |
| H214 | 1.606643411  | -0.318103911 | -9.781815321  |
| H215 | -0.415568462 | -5.192619225 | -3.837012982  |
| H216 | 0.496267447  | -1.808058342 | -8.046518011  |
| H217 | 1.728659253  | -1.450789337 | -10.971155221 |
| H218 | -5.604693218 | -2.633411394 | -5.203502430  |
| H219 | -3.103560365 | -2.172273734 | -1.930055493  |
| H220 | 2.974108218  | -3.579238920 | -8.039757341  |
| H221 | -1.783491755 | -3.961030487 | -2.488759295  |
| H222 | -4.589055005 | 1.953257416  | 2.402111590   |
| H223 | -3.353504926 | 0.257635784  | 0.522142089   |
| H224 | -8.852715716 | 0.086348036  | 1.598797803   |
| H225 | -7.288386607 | -0.159259631 | -0.935085775  |
| H226 | -7.455202636 | 3.626480183  | 1.270289137   |
| H227 | -9.499124514 | 7.793725293  | 3.822979211   |
| H228 | -8.194447331 | 4.163463055  | 4.343827354   |
| H229 | -9.703183179 | 4.756884906  | 2.109615034   |
| H230 | -6.993450512 | 6.205535526  | 2.372372857   |

|      |               |               |              |
|------|---------------|---------------|--------------|
| H231 | -11.101985487 | 9.265358845   | 0.189259883  |
| H232 | -3.636978604  | 3.917800474   | 1.216701451  |
| H233 | -4.943596070  | 3.881524525   | 0.023440298  |
| H234 | -10.707467510 | 9.723077213   | 2.669915845  |
| H235 | -8.778398362  | 5.268957457   | 0.700543538  |
| H236 | -6.417924556  | 1.814841190   | 0.083619617  |
| H237 | -7.652587998  | -1.174657963  | 1.308897188  |
| H238 | -9.526637302  | 2.128021306   | -2.402230875 |
| H239 | -1.576445015  | 2.075392300   | -2.885928580 |
| H240 | -9.830076668  | 0.424631716   | -2.788618945 |
| H241 | 9.123912652   | 2.445495480   | 5.890760485  |
| H242 | 7.631283051   | 2.620215266   | 5.248617639  |
| H243 | 1.661039260   | 6.119640873   | 0.313224404  |
| H244 | -0.933328904  | 5.301615789   | 1.246092957  |
| H245 | 1.290016697   | 7.793975199   | 2.449887925  |
| H246 | -3.071320107  | 3.871904088   | -1.723152380 |
| H247 | -4.351522332  | 4.760950420   | -3.111935918 |
| H248 | -5.532776628  | 4.331046417   | -4.987070586 |
| H249 | -4.336328503  | 5.772093732   | -1.878025582 |
| H250 | -4.358871516  | 2.167245928   | -5.084874067 |
| H251 | -6.136523024  | 2.228378273   | -5.307964093 |
| H252 | -0.005180247  | 11.745929817  | 0.655488069  |
| H253 | -1.241135447  | 13.010049154  | 0.800687891  |
| H254 | -0.398292852  | 10.677550958  | -1.251892210 |
| H255 | -2.010676107  | 10.203673061  | -1.797713258 |
| H256 | -2.380099918  | 10.304884280  | -4.796820500 |
| H257 | -1.248539121  | 6.000196625   | -5.106500380 |
| H258 | -7.219478755  | 8.710462942   | -0.608744865 |
| H259 | -3.839395663  | 7.968001496   | 2.963201993  |
| H260 | -4.031087624  | 8.325682643   | -2.388831214 |
| H261 | 1.850937324   | 6.079236883   | -2.282300430 |
| H262 | 2.815346536   | 7.674630758   | -0.913604978 |
| H263 | -0.628280273  | 5.476793488   | -2.544257184 |
| H264 | -7.689049583  | 0.262192271   | -3.650315266 |
| H265 | 4.207752558   | 10.573561111  | -0.901141503 |
| H266 | -5.028192848  | -0.169279543  | -4.707958538 |
| H267 | 1.633278603   | 7.354268772   | -3.480829106 |
| H268 | -3.573006750  | 6.853781515   | 0.784491574  |
| H269 | 3.473755556   | 10.548576735  | 0.715119808  |
| H270 | -1.470429944  | 9.018627604   | -5.503116282 |
| H271 | -4.164315598  | 9.726139640   | -3.403057333 |
| H272 | -3.939913662  | -2.619161768  | -5.348006070 |
| H273 | -5.197150570  | -2.981045542  | -2.972100282 |
| H274 | -7.408576736  | 9.941197903   | 1.534931527  |
| H275 | -4.705179411  | 1.806645695   | -2.632042194 |
| H276 | 0.172453950   | 8.628994014   | -1.925891233 |
| H277 | -0.358097813  | 7.496638414   | -4.808400291 |
| H278 | 0.475429241   | 5.162152396   | -3.875952782 |
| H279 | -2.718813156  | 6.587813615   | -3.171673405 |
| H280 | -0.332542190  | 8.079495929   | 4.853794966  |
| H281 | -0.820332980  | 9.521907812   | 2.011139275  |
| H282 | -0.662687188  | 12.247811892  | 2.979477148  |
| H283 | 1.284991032   | 8.753694963   | 4.539921289  |
| H284 | -3.208526858  | 10.081648289  | 3.208133099  |
| H285 | 6.944993027   | -1.088946898  | -8.085376550 |
| H286 | 6.754309827   | -2.717937051  | -7.411204506 |
| H287 | 9.155928370   | -4.137839516  | -3.848760968 |
| H288 | 7.766646971   | -2.887909448  | -9.563462711 |
| H289 | 6.224663876   | -3.396009500  | -9.769483837 |
| H290 | 5.341774920   | 4.775207284   | 1.578691812  |
| H291 | 5.148061908   | 7.091371769   | 3.549566178  |
| H292 | 5.265621950   | 8.562234106   | -0.449822385 |
| H293 | 3.802858862   | 5.470472661   | 2.177955985  |
| H294 | 6.421765049   | 7.894229477   | 2.911312338  |
| H295 | 6.918737942   | 4.092566234   | -4.416274696 |
| H296 | 6.076363579   | 6.966419336   | 0.768125265  |
| H297 | 4.110950643   | -8.012173000  | 4.629774924  |
| H298 | 6.447036665   | -8.398351522  | 2.678887844  |
| H299 | 5.280089015   | 2.705680291   | -5.185497734 |
| H300 | 4.079289310   | -0.848325289  | 4.267059733  |
| H301 | 2.759864772   | 3.293395396   | -7.661741610 |
| H302 | 0.116442928   | -1.174633221  | -4.901148870 |
| H303 | 2.195250457   | 3.460937458   | -5.996446252 |
| H304 | 3.179824092   | -5.417524707  | 4.488765268  |
| H305 | 3.789033329   | 1.366514437   | -5.594531050 |
| H306 | 3.216461376   | -5.651488658  | 2.734749120  |
| H307 | 4.039687582   | -7.944149926  | 2.853017946  |
| H308 | 5.734222389   | -6.035022776  | 2.920770574  |
| H309 | 5.566194256   | -5.988345471  | 4.683299058  |
| H310 | -3.319427361  | 0.705073546   | -7.598310885 |
| H311 | 4.835401248   | -10.411122894 | 4.197236066  |
| H312 | 4.435126440   | -12.252707592 | 1.795654690  |

|       |              |               |              |
|-------|--------------|---------------|--------------|
| H313  | 1.277256104  | 0.794817943   | -3.872744712 |
| H314  | 5.061978323  | -12.901112100 | 4.572718614  |
| H315  | 3.661092711  | -13.095966260 | 3.747025312  |
| H316  | 4.959194829  | -3.824655903  | 2.678398630  |
| H317  | 0.463699364  | 3.075038021   | -4.314650504 |
| H318  | -1.754716053 | -0.811579044  | -6.485785051 |
| H319  | 8.188895179  | -9.491637046  | -1.642161025 |
| H320  | 7.630994880  | -6.752663674  | -3.352578785 |
| H321  | 6.751158833  | -8.083875881  | -0.076921336 |
| H322  | 7.662231747  | -9.829200029  | -3.065667560 |
| H323  | 7.130391327  | 4.430155558   | -7.184065966 |
| H324  | 6.412431708  | -5.013381701  | 0.381698251  |
| H325  | 2.289726480  | -7.827353957  | -0.226929400 |
| H326  | 5.241322143  | -0.452441881  | -6.689161365 |
| H327  | 3.501931358  | -8.870990881  | -1.926474847 |
| H328  | 5.008116069  | -5.294167826  | -7.197458965 |
| H329  | 3.673711351  | -4.250319759  | -5.312581975 |
| H330  | 5.916630698  | -13.006457401 | 2.394084150  |
| H331  | 5.065480163  | -1.546133438  | 3.014086207  |
| H332  | 8.094472923  | -5.981842742  | 1.738801518  |
| H333  | 7.142550206  | -3.785176378  | 0.981481138  |
| H334  | 8.203141793  | -7.457751061  | 3.565683839  |
| H335  | 2.341853934  | -3.777964674  | 5.205142526  |
| H336  | 4.889514086  | -7.378112792  | -4.212702372 |
| H337  | 5.744277435  | -7.962351627  | -2.778907439 |
| H338  | 2.706562590  | -8.0663685147 | -3.285428805 |
| H339  | 2.983931309  | -0.879040320  | -5.856077042 |
| H340  | -1.404623208 | 3.455130276   | -5.941864437 |
| H341  | -3.257009464 | 2.467510853   | -7.343780132 |
| H342  | 2.306187956  | -6.066506964  | -0.014119731 |
| H343  | 8.348065540  | -7.441783799  | 1.256282844  |
| H344  | 7.336509199  | -9.316729411  | 0.643127163  |
| H345  | 2.667709213  | -2.124859874  | 5.576084105  |
| H346  | 7.337173204  | -6.060543280  | -6.425634886 |
| H347  | 7.371441897  | -5.260595623  | -2.465575552 |
| H348  | 2.519288625  | -1.329195378  | -7.523114640 |
| H349  | 5.818384232  | 5.473205405   | -4.629398390 |
| H350  | 6.503771220  | -0.807732492  | 5.762158950  |
| H351  | 6.960146935  | -0.027149664  | 4.230981495  |
| H352  | 10.578334201 | -5.488438932  | -5.151507722 |
| H353  | 9.693653356  | -6.843361703  | -4.883326311 |
| H354  | 10.747315701 | -8.206164301  | -0.698674347 |
| H355  | 9.387581894  | -7.539504178  | -2.399392541 |
| H356  | 12.590245353 | -6.755092413  | -2.127516163 |
| H357  | 10.424360644 | -6.632461758  | 0.056031207  |
| H358  | 9.608549386  | -0.277414028  | 4.840285938  |
| H359  | -4.353607345 | 12.164266373  | 5.480112904  |
| H360  | 8.681025924  | -8.039065722  | 6.480600121  |
| H361  | 8.233327126  | -5.440512280  | 5.694042019  |
| H362  | -5.381759636 | 11.811560655  | 2.657687285  |
| H363  | -5.257144487 | 9.351677518   | 4.512017677  |
| H364  | -6.741153733 | 10.122473948  | 3.923890210  |
| H365  | 1.337634041  | -3.132467012  | -1.251217697 |
| H366  | 4.172103947  | -1.421533696  | 0.883344669  |
| H367  | -6.053307913 | 7.115784253   | -1.764379749 |
| H368  | 0.189823541  | -0.536200181  | -0.293131641 |
| H369  | 2.108315256  | -1.576695250  | 0.409838235  |
| H370  | 1.561638022  | -2.238142498  | 0.239095511  |
| H371  | -1.808576026 | -0.042038737  | -1.501110329 |
| Mo372 | 4.433146023  | -3.825056779  | -2.110903898 |
| N373  | -6.349325453 | -6.815434915  | -3.647742406 |
| N374  | -8.730516363 | -4.783221912  | -1.597066134 |
| N375  | -8.758631752 | -5.664783071  | 1.068672826  |
| N376  | -6.115790734 | -6.473661617  | 1.648934785  |
| N377  | -4.808293142 | -3.969126566  | 1.659116843  |
| N378  | -6.173508531 | -2.863162358  | 3.938978980  |
| N379  | -5.578797532 | -4.702332145  | 6.102128284  |
| N380  | -2.939137769 | -5.954874418  | 5.903519215  |
| N381  | -1.385465164 | -3.806802127  | 5.148320249  |
| N382  | -2.175327505 | -1.080829336  | 6.341283320  |
| N383  | -3.158703635 | -1.866765817  | 8.950034354  |
| N384  | 4.443931244  | -12.456224556 | 3.890235408  |
| N385  | 5.498955897  | -10.026698523 | 3.516260695  |
| N386  | 4.255539950  | -3.960394685  | 3.408431889  |
| N387  | 2.952549691  | -2.967079179  | 5.084615182  |
| N388  | 4.416893551  | -1.688947045  | 3.808591225  |
| N389  | 8.008710038  | -7.789178279  | 4.536467368  |
| N390  | -4.753901977 | -2.148927130  | -4.911184858 |
| N391  | -0.825315352 | -4.774900676  | -4.679298821 |
| N392  | -5.282170470 | 0.136417494   | -3.752685770 |
| N393  | -7.840795307 | 0.998808294   | -2.964263012 |
| N394  | -8.055633211 | 0.111807327   | -0.311709029 |

|      |               |               |               |
|------|---------------|---------------|---------------|
| N395 | -6.173815573  | 1.665512073   | 1.067299633   |
| N396 | -2.879765858  | 2.900204521   | -1.352399171  |
| N397 | -2.315649195  | 0.820423295   | -1.284896745  |
| N398 | -7.027068128  | 4.118383273   | 2.050021277   |
| N399 | -10.118371727 | 7.385410873   | 0.574658873   |
| N400 | -10.424278441 | 8.870145958   | 2.194557778   |
| N401 | 8.422555307   | 1.973894446   | 5.314291374   |
| N402 | 5.893625428   | 7.019253714   | 2.849785799   |
| N403 | 4.478045707   | 8.794467200   | 0.150096140   |
| N404 | 2.060468862   | 8.344923823   | -1.098499012  |
| N405 | -2.130376328  | 7.259285372   | -3.694468614  |
| N406 | -2.015651347  | 9.360585424   | -4.718571042  |
| N407 | -3.596541142  | 8.949652080   | -3.073922093  |
| N408 | 0.681260368   | 6.403203832   | 0.502314018   |
| N409 | 0.371226859   | 7.824567811   | 2.901508932   |
| N410 | -0.933836984  | 10.232450192  | 2.733737153   |
| N411 | -1.420448658  | 10.783433842  | -1.204904356  |
| N412 | -3.538441269  | 11.038828647  | 3.308660600   |
| N413 | 6.795798962   | -2.567908005  | -9.578154569  |
| N414 | 4.538585255   | -0.926051898  | -7.266300722  |
| N415 | 3.293394098   | 1.711805168   | -6.433169385  |
| N416 | 5.240842044   | 3.657093016   | -5.561465645  |
| N417 | 1.099232940   | -0.760366976  | -10.556943952 |
| N418 | -0.897357668  | 0.707928531   | -9.105266417  |
| N419 | 9.626000914   | -5.825476609  | -4.982067725  |
| N420 | 5.423764906   | -4.648500571  | -4.112200481  |
| N421 | 5.374474865   | -5.156281939  | -6.258207017  |
| N422 | 9.994625115   | -6.805659499  | -2.025277456  |
| N423 | -0.554896751  | 2.280954333   | 0.961760249   |
| N424 | -0.024408889  | 2.561329758   | 0.020179935   |
| O425 | -6.534437275  | -5.256663435  | -1.229481873  |
| O426 | -8.048234755  | -3.606934034  | 1.750207797   |
| O427 | -6.610878042  | -6.386395313  | 3.873529624   |
| O428 | -3.425441536  | -4.822564818  | 3.259317663   |
| O429 | -4.284038448  | -1.645251169  | 4.272545583   |
| O430 | -5.506229387  | -2.840057261  | 7.435177526   |
| O431 | -2.938886552  | -6.007487775  | 8.195626843   |
| O432 | 0.561835637   | -4.958534624  | 5.566155841   |
| O433 | 0.059179804   | -1.242255836  | 6.792245741   |
| O434 | -1.792469745  | -0.238222509  | 9.745061169   |
| O435 | -1.760700361  | -2.874113575  | 12.094475451  |
| O436 | 6.664300940   | -10.656744839 | 1.620495235   |
| O437 | 6.546659815   | -8.878865349  | 5.939765771   |
| O438 | 10.155297396  | -5.566931807  | 6.363026707   |
| O439 | -5.414561824  | -0.731328328  | -1.633470520  |
| O440 | -2.328189207  | -3.383603867  | -5.670355595  |
| O441 | -6.859267886  | 2.660178684   | -1.741021708  |
| O442 | -5.330395916  | 3.802100612   | -4.194930690  |
| O443 | -10.078166333 | 1.175714976   | -0.102231737  |
| O444 | -6.613977903  | 0.566532502   | 3.020809412   |
| O445 | -5.249900104  | 4.194257704   | 3.483084700   |
| O446 | -7.938115567  | 6.136991445   | 4.813685776   |
| O447 | 9.351585152   | -1.144472639  | 6.671124920   |
| O448 | 2.214326730   | 3.650557852   | 5.596127578   |
| O449 | 3.335637479   | 8.297050420   | 2.059013540   |
| O450 | 1.477248534   | 10.567634735  | -0.967735796  |
| O451 | -1.242286673  | 7.323625284   | -0.329377911  |
| O452 | -1.511751509  | 6.588790823   | 3.342411738   |
| O453 | 1.755702143   | 5.281870613   | 3.255458162   |
| O454 | -0.267482975  | 10.840567373  | 4.841320652   |
| O455 | -3.083041648  | 13.198202887  | 2.728183414   |
| O456 | -3.222979306  | 11.145483915  | 0.155229173   |
| O457 | -6.254467475  | 12.708987154  | 4.964190583   |
| O458 | -5.206864717  | 7.073174260   | -1.278459199  |
| O459 | 4.157418874   | -2.645886482  | -8.742391298  |
| O460 | 1.997279124   | 1.058804023   | -8.207041635  |
| O461 | 4.112149611   | 5.266362087   | -6.704906480  |
| O462 | 7.796935522   | 6.107215642   | -6.228901984  |
| O463 | -2.394824718  | -0.579518525  | -10.247217873 |
| O464 | 0.408150509   | -5.163721346  | -7.434067708  |
| O465 | 2.427463157   | -4.218353360  | -7.486239191  |
| O466 | -1.693954425  | 4.135173044   | -8.507602572  |
| O467 | 10.769429662  | -4.675079044  | -2.035559637  |
| O468 | 13.044209339  | -6.584567018  | -0.143913053  |
| O469 | 0.843471796   | -5.876955731  | -2.457567678  |
| O470 | -0.124171694  | -7.298509400  | -1.010428277  |
| O471 | 6.219733733   | -10.044900056 | -4.051039314  |
| O472 | 4.049920523   | -10.015020267 | -4.684825591  |
| O473 | 5.472700473   | -5.518089627  | -1.163987348  |
| O474 | 5.098640548   | -7.479006347  | -0.133577225  |
| O475 | 3.246457619   | -5.559181693  | -2.533044984  |
| O476 | 8.623260193   | -6.787487584  | 1.957124510   |

|                    |      |               |                                   |              |
|--------------------|------|---------------|-----------------------------------|--------------|
|                    | O477 | 6.816232102   | -4.673782337                      | 1.221068094  |
|                    | O478 | -3.752876901  | 5.236451751                       | -2.473979995 |
|                    | O479 | 8.502957754   | -9.806765990                      | -2.518882843 |
|                    | O480 | 7.614606833   | -8.550496047                      | 0.079605352  |
|                    | S481 | 3.791681292   | 5.280144202                       | -0.245474898 |
|                    | S482 | 2.780627949   | 2.477969633                       | -2.353572359 |
|                    | S483 | 2.883849454   | -2.472272586                      | -3.333564981 |
|                    | S484 | 3.151806761   | 1.572597755                       | 1.113325668  |
|                    | S485 | 0.822132529   | -0.456246054                      | -1.499885353 |
|                    | S486 | 5.491470424   | 0.341914005                       | -4.274680996 |
|                    | S487 | 3.639691001   | -3.527641164                      | 0.032906662  |
|                    | S488 | 6.090547777   | 2.322085993                       | -0.915282805 |
|                    | S489 | 6.387808230   | -2.489601592                      | -1.990249049 |
|                    | S490 | 6.328469717   | -0.787357114                      | 1.106806958  |
|                    | end  |               |                                   |              |
| <b>pre-capture</b> |      |               | <b>precapt2n2x1dtf_1_53140.46</b> |              |
| <b>2N2 TS</b>      | C1   | -7.577785403  | -5.384722860                      | -1.938664070 |
| <b>35, S=1/2</b>   | C2   | -7.665515754  | -6.300133215                      | -3.164997606 |
|                    | C3   | -8.777163378  | -3.766547012                      | -0.535463924 |
|                    | C4   | -8.480753614  | -4.316372052                      | 0.855835811  |
|                    | C5   | -8.455448360  | -6.254156286                      | 2.347629249  |
|                    | C6   | -6.965155835  | -6.351147121                      | 2.686744458  |
|                    | C7   | -4.664351533  | -6.382982047                      | 1.875518224  |
|                    | C8   | -4.223911969  | -4.984244207                      | 2.323484371  |
|                    | C9   | -4.599506365  | -2.572616155                      | 2.020777425  |
|                    | C10  | -5.000946275  | -2.276049174                      | 3.473994175  |
|                    | C11  | -6.584493697  | -2.572080558                      | 5.273171233  |
|                    | C12  | -5.796378301  | -3.338757701                      | 6.345396741  |
|                    | C13  | -5.014788140  | -5.543304214                      | 7.100132020  |
|                    | C14  | -3.502547207  | -5.811407010                      | 7.111222683  |
|                    | C15  | -1.479301046  | -6.216502901                      | 5.765737940  |
|                    | C16  | -0.655136865  | -4.954425196                      | 5.495997763  |
|                    | C17  | -0.761474704  | -2.560605724                      | 4.911733490  |
|                    | C18  | -0.934639154  | -1.592103023                      | 6.099059144  |
|                    | C19  | -1.202422826  | -2.013578229                      | 3.531930937  |
|                    | C20  | -0.774150165  | -0.559030166                      | 3.274751816  |
|                    | C21  | -0.699639537  | -2.932372116                      | 2.411309037  |
|                    | C22  | -2.398754720  | -0.106958543                      | 7.389554199  |
|                    | C23  | -2.405319001  | -0.733268938                      | 8.797828932  |
|                    | C24  | -3.668258777  | 0.727562185                       | 7.090937850  |
|                    | C25  | -4.015749974  | 1.654574186                       | 8.261375011  |
|                    | C26  | -3.483483791  | 1.540470746                       | 5.802227634  |
|                    | C27  | -3.272872158  | -2.430739389                      | 10.297988056 |
|                    | C28  | -1.919805653  | -2.761604237                      | 10.897197848 |
|                    | C29  | 5.162305408   | -12.235791092                     | 2.654378006  |
|                    | C30  | 5.858218347   | -10.883086738                     | 2.560475006  |
|                    | C31  | 5.902980841   | -8.624622081                      | 3.608492429  |
|                    | C32  | 6.840292602   | -8.432285263                      | 4.815498516  |
|                    | C33  | 4.658062046   | -7.728733396                      | 3.715793314  |
|                    | C34  | 5.012258390   | -6.245513222                      | 3.752033633  |
|                    | C35  | 3.785736051   | -5.352150947                      | 3.580228007  |
|                    | C36  | 3.863372897   | -2.905015103                      | 4.148734854  |
|                    | C37  | 8.998417708   | -7.536125809                      | 5.556268022  |
|                    | C38  | 9.152399043   | -6.072085039                      | 5.902092106  |
|                    | C39  | -4.627040043  | -2.185309791                      | -3.434556010 |
|                    | C40  | -5.155881253  | -0.874823572                      | -2.820383567 |
|                    | C41  | -3.153702533  | -2.365386352                      | -3.003853675 |
|                    | C42  | -2.542133983  | -3.756073518                      | -3.269815572 |
|                    | C43  | -1.888860499  | -3.936313641                      | -4.639701172 |
|                    | C44  | -5.473383191  | 1.517989241                       | -3.332704002 |
|                    | C45  | -6.795215813  | 1.776509630                       | -2.597546751 |
|                    | C46  | -5.307137432  | 2.411573129                       | -4.569832265 |
|                    | C47  | -9.129455317  | 1.093095769                       | -2.287821131 |
|                    | C48  | -9.131524995  | 0.788898544                       | -0.786193319 |
|                    | C49  | -7.899134197  | -0.104070986                      | 1.135267127  |
|                    | C50  | -6.853849844  | 0.760015814                       | 1.841741423  |
|                    | C51  | -5.192873410  | 2.548908796                       | 1.718337410  |
|                    | C52  | -5.847806000  | 3.686048504                       | 2.537432880  |
|                    | C53  | -4.294064624  | 3.250801366                       | 0.689137422  |
|                    | C54  | -3.460778970  | 2.378814199                       | -0.188785898 |
|                    | C55  | -3.088868502  | 1.058320103                       | -0.145018084 |
|                    | C56  | -2.154665152  | 1.962808369                       | -1.956397252 |
|                    | C57  | -7.675868032  | 5.338042092                       | 2.525284006  |
|                    | C58  | -7.976871567  | 5.187072351                       | 4.014142655  |
|                    | C59  | -8.985345410  | 5.515153656                       | 1.718480507  |
|                    | C60  | -9.609600554  | 6.879486195                       | 1.731403717  |
|                    | C61  | -9.793745834  | 7.787437146                       | 2.756472330  |
|                    | C62  | -10.633955177 | 8.579731630                       | 0.865381081  |
|                    | C63  | 7.980303115   | 0.730503250                       | 5.985687547  |
|                    | C64  | 9.055990743   | -0.331680248                      | 5.851980229  |
|                    | C65  | 6.708658307   | 0.159978831                       | 5.307875182  |

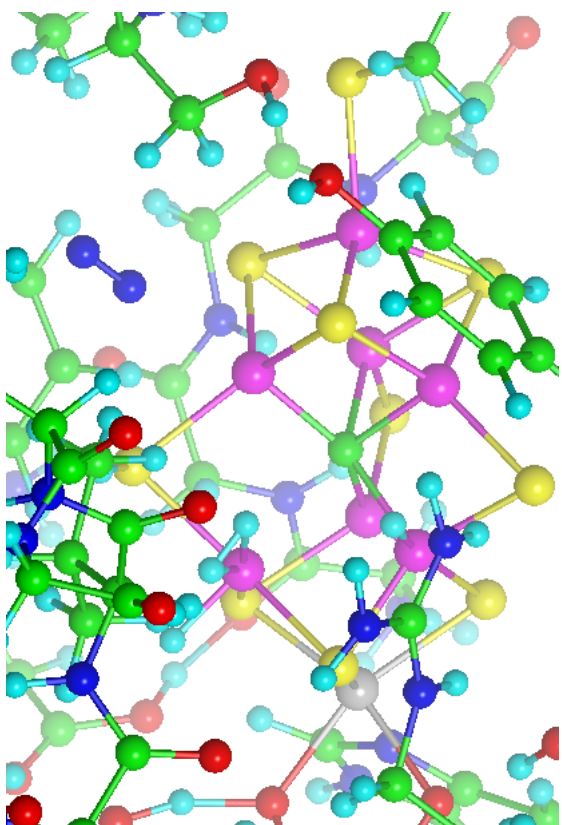

|       |              |              |               |
|-------|--------------|--------------|---------------|
| C66   | 5.514721203  | 1.078526837  | 5.411399299   |
| C67   | 4.634827225  | 1.013965828  | 6.507523118   |
| C68   | 5.250587727  | 2.031181246  | 4.411958175   |
| C69   | 3.523206702  | 1.859400667  | 6.600028290   |
| C70   | 4.156058767  | 2.892000047  | 4.498011453   |
| C71   | 3.290249524  | 2.802060145  | 5.591869374   |
| C72   | 5.275068694  | 6.908149029  | 1.529859213   |
| C73   | 4.268192325  | 8.044032847  | 1.284875070   |
| C74   | 4.590706517  | 5.546389725  | 1.398512265   |
| C75   | 3.660966279  | 9.947270691  | -0.167796409  |
| C76   | 2.293431720  | 9.636594977  | -0.781530341  |
| C77   | 0.795281990  | 7.806213698  | -1.561147468  |
| C78   | -0.015571916 | 7.162033791  | -0.407018097  |
| C79   | 1.115597944  | 6.788308434  | -2.681248409  |
| C80   | -0.022600254 | 5.970384986  | -3.302724298  |
| C81   | -0.931714441 | 6.696079712  | -4.307849592  |
| C82   | -2.601155839 | 8.497051085  | -3.853548604  |
| C83   | -0.038007682 | 5.775908847  | 1.608508542   |
| C84   | -0.483339122 | 6.778607070  | 2.682479768   |
| C85   | 0.792527480  | 4.680866900  | 2.314643195   |
| C86   | 0.289850534  | 8.615890527  | 4.097868227   |
| C87   | -0.311459722 | 10.000916152 | 3.924994390   |
| C88   | -1.315619421 | 11.593457124 | 2.378011405   |
| C89   | -2.742947041 | 12.016577855 | 2.801447158   |
| C90   | -1.069662717 | 11.926037264 | 0.904257461   |
| C91   | -2.009634914 | 11.210866141 | -0.058070551  |
| C92   | -4.966925474 | 11.279503880 | 3.521823395   |
| C93   | -5.203281216 | 12.135698001 | 4.759942218   |
| C94   | -5.703425114 | 9.918750461  | 3.665766100   |
| C95   | -5.630280660 | 9.093060409  | 2.400871026   |
| C96   | -6.578041115 | 9.271477858  | 1.382097711   |
| C97   | -4.588303142 | 8.176793111  | 2.181819360   |
| C98   | -6.479155129 | 8.580820950  | 0.172607683   |
| C99   | -4.452531172 | 7.501022906  | 0.964456597   |
| C100  | -5.401721229 | 7.716477480  | -0.029730894  |
| C101  | 6.440911776  | -2.055223001 | -8.235217745  |
| C102  | 4.935562874  | -1.887086950 | -8.121029516  |
| C103  | 3.129588588  | -0.648030228 | -6.950463522  |
| C104  | 2.735100302  | 0.798567441  | -7.271712716  |
| C105  | 3.033261010  | 3.1466610895 | -6.622532332  |
| C106  | 4.176760466  | 4.105741101  | -6.303359474  |
| C107  | 6.235289062  | 4.611801586  | -5.114013647  |
| C108  | 7.135435139  | 5.072841390  | -6.242684270  |
| C109  | -0.138569202 | -1.422717026 | -10.076205392 |
| C110  | -1.255131880 | -0.407272377 | -9.809703735  |
| C111  | 0.011812040  | -2.370622064 | -8.863508412  |
| C112  | 0.840149705  | -3.615519806 | -9.230273387  |
| C113  | 1.196299842  | -4.407634437 | -7.991610865  |
| C114  | -1.906160924 | 1.724349715  | -8.806776762  |
| C115  | -1.319957652 | 3.104540331  | -9.027717666  |
| C116  | -2.668710880 | 1.550324164  | -7.469792068  |
| C117  | -1.703997844 | 1.354548320  | -6.335193596  |
| C118  | -1.102557161 | 2.453670443  | -5.700855443  |
| C119  | -1.261498716 | 0.058634125  | -6.014269023  |
| C120  | -0.026764983 | 2.260774605  | -4.827322442  |
| C121  | -0.184583188 | -0.132041804 | -5.145265058  |
| C122  | 0.457633328  | 0.973603473  | -4.578783235  |
| C123  | 9.123498545  | -5.225487543 | -3.729095090  |
| C124  | 10.020448699 | -5.538844515 | -2.520700875  |
| C125  | 7.684161841  | -5.689272119 | -3.460241479  |
| C126  | 6.649991258  | -5.278840081 | -4.459959098  |
| C127  | 6.618470670  | -5.584195286 | -5.804990505  |
| C128  | 4.704631430  | -4.632628609 | -5.228892719  |
| C129  | 10.788474032 | -7.115409070 | -0.848418039  |
| C130  | 12.245470375 | -6.758342047 | -1.042933252  |
| C131  | 0.898920616  | -6.739439252 | -1.448904046  |
| C132  | 2.260849243  | -6.872832873 | -0.773181242  |
| C133  | 3.469938613  | -6.739306916 | -1.745290465  |
| C134  | 3.584355447  | -8.018136149 | -2.618959761  |
| C135  | 4.877049997  | -8.149274222 | -3.429547282  |
| C136  | 5.054027237  | -9.525773677 | -4.108844561  |
| C137  | 4.769020987  | -6.606840961 | -0.934951274  |
| C138  | 4.073143840  | -0.270126286 | -1.302779160  |
| Fe139 | 4.758298311  | -1.243255112 | -2.866833958  |
| Fe140 | 2.559250381  | 0.853519726  | -0.893785499  |
| Fe141 | 5.183137025  | 0.686936263  | 0.051632669   |
| Fe142 | 4.666461802  | 1.260293179  | -2.439397587  |
| Fe143 | 4.047480013  | 3.003545922  | -0.495569316  |
| Fe144 | 4.962037943  | -1.788019186 | -0.375414643  |
| Fe145 | 2.473229360  | -2.093211880 | -1.127326149  |
| H146  | -5.903658684 | -7.297932059 | -2.914352614  |
| H147  | -5.807133684 | -6.064262289 | -3.978838396  |



|      |              |              |               |
|------|--------------|--------------|---------------|
| H148 | -9.540872226 | -4.826308288 | -2.224349429  |
| H149 | -8.183625739 | -5.756540746 | -3.971212376  |
| H150 | -8.328427279 | -7.138682888 | -2.888944485  |
| H151 | -8.042708528 | -2.968237216 | -0.717420300  |
| H152 | -9.120081592 | -6.178929280 | 0.301433471   |
| H153 | -9.775079973 | -3.307959920 | -0.521182791  |
| H154 | -8.887025894 | -7.263234757 | 2.344236987   |
| H155 | -6.449623195 | -6.376096205 | 0.689379646   |
| H156 | -8.925491908 | -5.686493648 | 3.161599785   |
| H157 | -3.545917425 | -2.284794905 | 1.911972867   |
| H158 | -5.431273196 | -4.174296143 | 0.873092385   |
| H159 | -4.146355622 | -6.654873773 | 0.946186082   |
| H160 | -6.478571378 | -1.503777820 | 5.501810701   |
| H161 | -6.793865007 | -3.272682159 | 3.243001875   |
| H162 | -4.363439601 | -7.090281292 | 2.657143561   |
| H163 | -5.193790593 | -1.951869741 | 1.336283974   |
| H164 | -5.891840799 | -5.055353792 | 5.211705866   |
| H165 | -7.644434818 | -2.847989337 | 5.362040175   |
| H166 | -1.017038369 | -3.974083820 | 2.557980141   |
| H167 | -1.086975794 | -2.601611075 | 1.434037675   |
| H168 | 0.400819838  | -2.909375376 | 2.357002785   |
| H169 | -2.299729961 | -2.033610640 | 3.540959321   |
| H170 | -5.524500206 | -6.512566020 | 6.990520641   |
| H171 | -3.285608911 | 0.900272453  | 4.932097096   |
| H172 | -3.792321814 | -2.183555978 | 8.242306731   |
| H173 | -4.232309437 | 1.099622787  | 9.185224210   |
| H174 | 0.222897867  | -0.506354493 | 2.811207697   |
| H175 | -0.754319356 | 0.053219439  | 4.186833667   |
| H176 | 7.764938219  | 0.854541469  | 7.064568508   |
| H177 | -4.389243623 | 2.124070420  | 5.582668381   |
| H178 | -4.902457114 | 2.253965822  | 8.007885649   |
| H179 | -2.645232000 | 2.247919925  | 5.916115440   |
| H180 | -3.185896943 | 2.348740714  | 8.469323394   |
| H181 | -4.506347983 | 0.021982677  | 6.947099079   |
| H182 | -1.526483207 | 0.564432415  | 7.398418221   |
| H183 | -2.942678985 | -1.304574737 | 5.684913379   |
| H184 | -1.490088891 | -0.078726544 | 2.589315885   |
| H185 | 1.329156370  | 4.090308160  | 1.555769326   |
| H186 | 0.074009752  | 4.025448358  | 2.830767152   |
| H187 | 1.760186453  | 4.658365746  | 4.027407630   |
| H188 | 1.646765523  | 3.461537902  | 6.389135488   |
| H189 | 3.953346657  | 3.612688817  | 3.705288497   |
| H190 | 5.894960829  | 2.080431818  | 3.530993619   |
| H191 | 4.809238643  | 0.281146396  | 7.300384317   |
| H192 | -2.375835697 | -3.955831628 | 5.024901719   |
| H193 | -1.284339030 | -6.924657277 | 4.946726874   |
| H194 | -1.101998906 | -6.662711240 | 6.694974247   |
| H195 | -3.444329713 | -5.866338847 | 5.034850003   |
| H196 | -5.259493677 | -5.129341740 | 8.085245992   |
| H197 | 2.839027848  | 1.781679952  | 7.449722413   |
| H198 | 0.319563078  | -2.743063699 | 4.887329185   |
| H199 | -3.822155745 | -1.788656235 | 11.005932283  |
| H200 | -3.823681469 | -3.379133458 | 10.201411562  |
| H201 | -1.101999613 | -2.938981124 | 10.161493543  |
| H202 | 9.975732385  | -7.949969993 | 5.264712446   |
| H203 | -0.387912426 | -4.954393188 | -5.586959500  |
| H204 | 1.896336381  | -5.563875260 | -2.613449311  |
| H205 | 0.245032633  | -4.262858362 | -9.890379311  |
| H206 | 1.753107602  | -3.319473295 | -9.766674083  |
| H207 | -0.977258285 | -2.693138170 | -8.503228223  |
| H208 | -0.496555487 | 3.136244354  | -9.779351296  |
| H209 | -0.523899517 | -2.019323255 | -10.917159764 |
| H210 | -2.545923261 | -1.591763330 | -3.502803273  |
| H211 | -3.320091176 | -4.533215831 | -3.178574390  |
| H212 | 0.0411707493 | 0.820805163  | -8.745890371  |
| H213 | -2.656213840 | 1.624232798  | -9.618652479  |
| H214 | 1.590823569  | -0.310566119 | -9.773791059  |
| H215 | -0.426529658 | -5.195281535 | -3.843377542  |
| H216 | 0.483828007  | -1.816952241 | -8.036896734  |
| H217 | 1.714328960  | -1.444829494 | -10.962299843 |
| H218 | -5.615346538 | -2.645502399 | -5.189422041  |
| H219 | -3.112930216 | -2.185170353 | -1.918828862  |
| H220 | 2.975327645  | -3.574632164 | -8.042266080  |
| H221 | -1.804265075 | -3.980774302 | -2.486149393  |
| H222 | -4.594029050 | 1.967433359  | 2.432988429   |
| H223 | -3.330575976 | 0.273682091  | 0.560294533   |
| H224 | -8.865546488 | 0.104447763  | 1.614199751   |
| H225 | -7.284667672 | -0.157703455 | -0.908954987  |
| H226 | -7.449639794 | 3.632535072  | 1.255742074   |
| H227 | -9.506145250 | 7.777452301  | 3.801859301   |
| H228 | -8.225823549 | 4.141767787  | 4.320149974   |
| H229 | -9.709915844 | 4.746488098  | 2.041971574   |

|      |               |               |              |
|------|---------------|---------------|--------------|
| H230 | -7.018372974  | 6.210277831   | 2.384039487  |
| H231 | -11.130311367 | 9.266970818   | 0.184811614  |
| H232 | -3.630491904  | 3.926193305   | 1.253322325  |
| H233 | -4.922385068  | 3.886793419   | 0.044571563  |
| H234 | -10.727110780 | 9.710155946   | 2.666706070  |
| H235 | -8.751058183  | 5.294457386   | 0.665114468  |
| H236 | -6.401658489  | 1.807914689   | 0.097614287  |
| H237 | -7.663320708  | -1.158316453  | 1.345778408  |
| H238 | -9.536739579  | 2.107637401   | -2.395815764 |
| H239 | -1.567867081  | 2.075950356   | -2.865256966 |
| H240 | -9.823474051  | 0.400404722   | -2.781784312 |
| H241 | 9.140243842   | 2.416641896   | 5.883171484  |
| H242 | 7.649335362   | 2.608834170   | 5.241490466  |
| H243 | 1.650087249   | 6.112288832   | 0.305878031  |
| H244 | -0.961303546  | 5.316489307   | 1.225598300  |
| H245 | 1.284196450   | 7.787820774   | 2.427124783  |
| H246 | -3.068408929  | 3.874791351   | -1.702965725 |
| H247 | -4.361183588  | 4.760417596   | -3.097776940 |
| H248 | -5.526977303  | 4.320393734   | -4.969405500 |
| H249 | -4.349559921  | 5.774558309   | -1.869451761 |
| H250 | -4.339010650  | 2.171720423   | -5.039807188 |
| H251 | -6.114334559  | 2.208513063   | -5.289972088 |
| H252 | -0.015234606  | 11.746859920  | 0.651731024  |
| H253 | -1.259578246  | 13.003763156  | 0.784974396  |
| H254 | -0.404107612  | 10.665140900  | -1.250666693 |
| H255 | -2.010527921  | 10.167648867  | -1.783410815 |
| H256 | -2.344728358  | 10.325908163  | -4.749632384 |
| H257 | -1.250127207  | 5.996986007   | -5.096311333 |
| H258 | -7.231666123  | 8.721311453   | -0.607557651 |
| H259 | -3.856243165  | 7.969485169   | 2.966861813  |
| H260 | -4.043290112  | 8.314192395   | -2.390318155 |
| H261 | 1.844154678   | 6.071732718   | -2.269334332 |
| H262 | 2.821187423   | 7.672124048   | -0.915432623 |
| H263 | -0.635774171  | 5.487803963   | -2.524924766 |
| H264 | -7.680271894  | 0.256930762   | -3.634291792 |
| H265 | 4.210051277   | 10.581342605  | -0.876410880 |
| H266 | -5.032271462  | -0.173910800  | -4.681149931 |
| H267 | 1.641684010   | 7.336313699   | -3.479773999 |
| H268 | -3.597589836  | 6.846017795   | 0.792333272  |
| H269 | 3.464019088   | 10.544499658  | 0.733977687  |
| H270 | -1.411985063  | 9.041337704   | -5.449272531 |
| H271 | -4.180076637  | 9.717993984   | -3.398217058 |
| H272 | -3.949520885  | -2.608322277  | -5.334060279 |
| H273 | -5.214313061  | -2.991619483  | -2.956966912 |
| H274 | -7.413323294  | 9.959778910   | 1.531948446  |
| H275 | -4.706239999  | 1.798388793   | -2.599126083 |
| H276 | 0.185203372   | 8.635431603   | -1.932979665 |
| H277 | -0.360517709  | 7.493623506   | -4.799382884 |
| H278 | 0.462987045   | 5.154125418   | -3.855079194 |
| H279 | -2.728069871  | 6.585428650   | -3.170335063 |
| H280 | -0.319203389  | 8.081944113   | 4.842864719  |
| H281 | -0.838012768  | 9.526599601   | 2.006947777  |
| H282 | -0.668308654  | 12.256106727  | 2.973486752  |
| H283 | 1.297132457   | 8.750364936   | 4.514751696  |
| H284 | -3.215279781  | 10.088813906  | 3.213883812  |
| H285 | 6.938767922   | -1.092339436  | -8.050655962 |
| H286 | 6.730414676   | -2.730847418  | -7.403034015 |
| H287 | 9.139644580   | -4.128939868  | -3.814320838 |
| H288 | 7.772652898   | -2.867163041  | -9.547201272 |
| H289 | 6.231624802   | -3.372280296  | -9.774743288 |
| H290 | 5.348572594   | 4.771187400   | 1.570046403  |
| H291 | 5.121913229   | 7.062769808   | 3.559666082  |
| H292 | 5.274739462   | 8.573832675   | -0.427493223 |
| H293 | 3.801689240   | 5.458692002   | 2.157651799  |
| H294 | 6.403066040   | 7.876504780   | 2.949360170  |
| H295 | 6.868847179   | 4.106628582   | -4.367879479 |
| H296 | 6.087062356   | 6.973260089   | 0.788498337  |
| H297 | 4.081540956   | -8.016696692  | 4.610038814  |
| H298 | 6.436678610   | -8.386566192  | 2.679994661  |
| H299 | 5.247894094   | 2.719340894   | -5.168733389 |
| H300 | 4.110771780   | -0.879306550  | 4.364498807  |
| H301 | 2.746256824   | 3.315731917   | -7.668014775 |
| H302 | 0.162894240   | -1.142459876  | -4.920227369 |
| H303 | 2.178287046   | 3.467521694   | -6.002823739 |
| H304 | 3.116535840   | -5.436270949  | 4.444940471  |
| H305 | 3.770094396   | 1.372660801   | -5.612590192 |
| H306 | 3.208681800   | -5.655320656  | 2.691864073  |
| H307 | 4.033119283   | -7.940455363  | 2.833584929  |
| H308 | 5.717348063   | -6.019024396  | 2.938097294  |
| H309 | 5.512256103   | -5.981260374  | 4.697453921  |
| H310 | -3.332338471  | 0.679678483   | -7.575714851 |
| H311 | 4.831087693   | -10.397189200 | 4.205805230  |

|       |              |               |              |
|-------|--------------|---------------|--------------|
| H312  | 4.435696809  | -12.260531121 | 1.828209471  |
| H313  | 1.324220455  | 0.849939812   | -3.931763040 |
| H314  | 5.079478212  | -12.864672213 | 4.613885816  |
| H315  | 3.680918833  | -13.095752760 | 3.794866682  |
| H316  | 4.907348903  | -3.810507322  | 2.675710901  |
| H317  | 0.462492085  | 3.110819773   | -4.348752402 |
| H318  | -1.745683031 | -0.809569754  | -6.466623730 |
| H319  | 8.179881334  | -9.491049974  | -1.644043546 |
| H320  | 7.671249201  | -6.791664932  | -3.407294376 |
| H321  | 6.745468334  | -8.087418961  | -0.071186000 |
| H322  | 7.656096402  | -9.834389636  | -3.067782440 |
| H323  | 7.149339570  | 4.406490679   | -7.138236032 |
| H324  | 6.421008947  | -5.014593781  | 0.384175234  |
| H325  | 2.299785988  | -7.821872909  | -0.225311561 |
| H326  | 5.218929088  | -0.441401785  | -6.698151051 |
| H327  | 3.506763570  | -8.875710500  | -1.931795069 |
| H328  | 5.022274658  | -5.298716972  | -7.203976836 |
| H329  | 3.692103767  | -4.259975599  | -5.315477437 |
| H330  | 5.923349010  | -13.001769524 | 2.430060525  |
| H331  | 5.106799956  | -1.584546600  | 3.127187111  |
| H332  | 8.094636602  | -5.979727192  | 1.739114193  |
| H333  | 7.140118233  | -3.777402403  | 0.980018858  |
| H334  | 8.197538039  | -7.455212090  | 3.565961638  |
| H335  | 2.316830201  | -3.802122569  | 5.230523771  |
| H336  | 4.893228739  | -7.385413436  | -4.221924074 |
| H337  | 5.751084262  | -7.968897916  | -2.789402042 |
| H338  | 2.712589023  | -8.062941220  | -3.289877842 |
| H339  | 2.962153631  | -0.864120533  | -5.883397430 |
| H340  | -1.449876195 | 3.462863423   | -5.933750242 |
| H341  | -3.292702300 | 2.446074806   | -7.330498168 |
| H342  | 2.308583441  | -6.057212742  | -0.031503429 |
| H343  | 8.343825357  | -7.439845569  | 1.257288063  |
| H344  | 7.339919129  | -9.316237946  | 0.647293557  |
| H345  | 2.704738538  | -2.179911691  | 5.675314074  |
| H346  | 7.348796436  | -6.076002567  | -6.436830577 |
| H347  | 7.375277445  | -5.337201844  | -2.469942811 |
| H348  | 2.505795587  | -1.309841010  | -7.554321299 |
| H349  | 5.786679127  | 5.493664901   | -4.631798879 |
| H350  | 6.483940711  | -0.807289009  | 5.780180998  |
| H351  | 6.941658865  | -0.029465245  | 4.247409694  |
| H352  | 10.600204257 | -5.409785575  | -5.140527175 |
| H353  | 9.755477309  | -6.793631268  | -4.910706389 |
| H354  | 10.739984846 | -8.204429723  | -0.690905633 |
| H355  | 9.379988398  | -7.535189080  | -2.393454420 |
| H356  | 12.586673954 | -6.759712018  | -2.106218502 |
| H357  | 10.403523469 | -6.632420175  | 0.064173394  |
| H358  | 9.603371958  | -0.307567669  | 4.878804871  |
| H359  | -4.350957567 | 12.174451113  | 5.478573379  |
| H360  | 8.672466551  | -8.051558445  | 6.476607560  |
| H361  | 8.247444840  | -5.443649489  | 5.713897789  |
| H362  | -5.386658491 | 11.826353575  | 2.661114752  |
| H363  | -5.270314396 | 9.363617759   | 4.512540629  |
| H364  | -6.750498167 | 10.137601799  | 3.920187196  |
| H365  | 1.420402687  | -3.166115372  | -1.188595344 |
| H366  | 4.319922905  | -1.423853992  | 0.925086515  |
| H367  | -6.075050729 | 7.117213963   | -1.759249603 |
| H368  | 0.148951855  | -0.640841012  | -0.565329472 |
| H369  | 2.193086971  | -1.434730250  | 0.334781284  |
| H370  | 1.681971043  | -2.129252982  | 0.257048932  |
| H371  | -1.806272721 | -0.037012449  | -1.479582815 |
| Mo372 | 4.467014257  | -3.841747758  | -2.113840544 |
| N373  | -6.411245434 | -6.828750683  | -3.668351619 |
| N374  | -8.741664317 | -4.757756625  | -1.598714562 |
| N375  | -8.739389345 | -5.627531940  | 1.067069660  |
| N376  | -6.101667686 | -6.462524760  | 1.645638256  |
| N377  | -4.791951600 | -3.961453589  | 1.636224321  |
| N378  | -6.153193274 | -2.834674098  | 3.910706491  |
| N379  | -5.525271279 | -4.642628310  | 6.074440781  |
| N380  | -2.910964675 | -6.003666604  | 5.896578864  |
| N381  | -1.374570137 | -3.853636431  | 5.170922723  |
| N382  | -2.182097252 | -1.108115749  | 6.341344626  |
| N383  | -3.164623531 | -1.842819827  | 8.975221165  |
| N384  | 4.453266055  | -12.440650980 | 3.925468409  |
| N385  | 5.494200598  | -10.014947042 | 3.523531886  |
| N386  | 4.205146964  | -3.960719253  | 3.403779036  |
| N387  | 2.956626823  | -3.007536919  | 5.142764510  |
| N388  | 4.459259075  | -1.721563484  | 3.916003374  |
| N389  | 7.998067683  | -7.781913767  | 4.537299804  |
| N390  | -4.770312751 | -2.152082507  | -4.894610488 |
| N391  | -0.837950538 | -4.775029339  | -4.683005364 |
| N392  | -5.282653339 | 0.132070968   | -3.724973174 |
| N393  | -7.838705380 | 0.991334157   | -2.947800702 |

|      |               |               |               |
|------|---------------|---------------|---------------|
| N394 | -8.056400951  | 0.113654949   | -0.290496065  |
| N395 | -6.162286663  | 1.665351544   | 1.083170593   |
| N396 | -2.866066352  | 2.907989110   | -1.327396251  |
| N397 | -2.287307557  | 0.833818655   | -1.247187115  |
| N398 | -7.029573058  | 4.126486773   | 2.039035167   |
| N399 | -10.139187502 | 7.387358208   | 0.554660569   |
| N400 | -10.443227971 | 8.861034482   | 2.185054520   |
| N401 | 8.430369450   | 1.950804190   | 5.312245274   |
| N402 | 5.877488184   | 7.001337214   | 2.869341996   |
| N403 | 4.482849566   | 8.800281108   | 0.168523487   |
| N404 | 2.069039846   | 8.345486570   | -1.099236680  |
| N405 | -2.138536902  | 7.257520974   | -3.691666288  |
| N406 | -2.039557437  | 9.358749918   | -4.719666971  |
| N407 | -3.609955826  | 8.942740064   | -3.071041792  |
| N408 | 0.671225784   | 6.400049603   | 0.490861724   |
| N409 | 0.369433065   | 7.820811913   | 2.887116870   |
| N410 | -0.937583582  | 10.237286849  | 2.731417363   |
| N411 | -1.425940732  | 10.766167359  | -1.203632736  |
| N412 | -3.544169476  | 11.046637072  | 3.308256193   |
| N413 | 6.801808079   | -2.547298492  | -9.567502325  |
| N414 | 4.522488588   | -0.911645945  | -7.284654094  |
| N415 | 3.280172244   | 1.725018440   | -6.452002002  |
| N416 | 5.216374027   | 3.669217747   | -5.548508686  |
| N417 | 1.083102015   | -0.757298175  | -10.546290086 |
| N418 | -0.915781344  | 0.702913079   | -9.091285829  |
| N419 | 9.656325460   | -5.776537742  | -4.987773840  |
| N420 | 5.442647396   | -4.670315394  | -4.118724552  |
| N421 | 5.389977930   | -5.165387036  | -6.265843526  |
| N422 | 9.992773513   | -6.804409220  | -2.022466599  |
| N423 | -0.383477878  | 2.610935261   | 0.528863718   |
| N424 | 0.450148348   | 2.108262224   | -0.004164090  |
| O425 | -6.544068528  | -5.245957981  | -1.260912859  |
| O426 | -8.026101773  | -3.567697500  | 1.739581549   |
| O427 | -6.589380507  | -6.340627925  | 3.870613495   |
| O428 | -3.421493242  | -4.806042504  | 3.256600779   |
| O429 | -4.289529710  | -1.566933294  | 4.201354091   |
| O430 | -5.488010913  | -2.782116410  | 7.413666081   |
| O431 | -2.895682249  | -5.903575036  | 8.185914062   |
| O432 | 0.588252580   | -4.990303708  | 5.565266226   |
| O433 | 0.049155440   | -1.282559035  | 6.790325015   |
| O434 | -1.751569474  | -0.234768290  | 9.729846388   |
| O435 | -1.740758478  | -2.893228603  | 12.098956321  |
| O436 | 6.661799764   | -10.657043171 | 1.633080652   |
| O437 | 6.522088401   | -8.845945724  | 5.944527883   |
| O438 | 10.171993361  | -5.592433373  | 6.372158760   |
| O439 | -5.419704037  | -0.744924629  | -1.608214774  |
| O440 | -2.327073205  | -3.361407644  | -5.663084599  |
| O441 | -6.866762598  | 2.654502763   | -1.719699547  |
| O442 | -5.346218476  | 3.795515199   | -4.169611803  |
| O443 | -10.094202961 | 1.153082808   | -0.099153125  |
| O444 | -6.657719866  | 0.619189777   | 3.052930286   |
| O445 | -5.275352712  | 4.203138640   | 3.500334053   |
| O446 | -7.997384163  | 6.112163658   | 4.807902191   |
| O447 | 9.304002174   | -1.173049070  | 6.703609665   |
| O448 | 2.206903872   | 3.659964266   | 5.616209979   |
| O449 | 3.323421226   | 8.274463371   | 2.059970357   |
| O450 | 1.481198376   | 10.564770518  | -0.962221361  |
| O451 | -1.240432934  | 7.351212734   | -0.331308153  |
| O452 | -1.513390834  | 6.588920572   | 3.342561143   |
| O453 | 1.722546380   | 5.241382892   | 3.241520838   |
| O454 | -0.239986630  | 10.842225211  | 4.828937730   |
| O455 | -3.089845845  | 13.203556269  | 2.723398714   |
| O456 | -3.223823161  | 11.101963536  | 0.166896992   |
| O457 | -6.254148353  | 12.718791649  | 4.971911064   |
| O458 | -5.229214231  | 7.070929227   | -1.272513664  |
| O459 | 4.154899088   | -2.643452046  | -8.748419801  |
| O460 | 1.984698553   | 1.080368797   | -8.228582904  |
| O461 | 4.099213251   | 5.280172580   | -6.700494411  |
| O462 | 7.826697914   | 6.075924304   | -6.177484020  |
| O463 | -2.414652215  | -0.601373099  | -10.210641037 |
| O464 | 0.413237207   | -5.163988427  | -7.425704549  |
| O465 | 2.429524874   | -4.210553528  | -7.483052173  |
| O466 | -1.726920378  | 4.124988874   | -8.489882486  |
| O467 | 10.779870241  | -4.679261893  | -2.033321833  |
| O468 | 13.026414292  | -6.561795470  | -0.122380394  |
| O469 | 0.860898046   | -5.875551060  | -2.469252984  |
| O470 | -0.103253610  | -7.336484389  | -1.056950933  |
| O471 | 6.220176089   | -10.054013176 | -4.060567277  |
| O472 | 4.046607444   | -10.020957260 | -4.688539870  |
| O473 | 5.496910473   | -5.543933908  | -1.165715732  |
| O474 | 5.100633764   | -7.497962182  | -0.130401526  |
| O475 | 3.270621595   | -5.560947757  | -2.530842859  |

|                                                                                    |      |                                     |               |              |
|------------------------------------------------------------------------------------|------|-------------------------------------|---------------|--------------|
|                                                                                    | O476 | 8.620346550                         | -6.787098203  | 1.959141219  |
|                                                                                    | O477 | 6.823902740                         | -4.669569780  | 1.221329085  |
|                                                                                    | O478 | -3.762904951                        | 5.240951980   | -2.463320270 |
|                                                                                    | O479 | 8.496193510                         | -9.803738849  | -2.520672063 |
|                                                                                    | O480 | 7.612854437                         | -8.549176020  | 0.082819770  |
|                                                                                    | S481 | 3.817075064                         | 5.277951320   | -0.263961421 |
|                                                                                    | S482 | 2.775731089                         | 2.529379441   | -2.350346589 |
|                                                                                    | S483 | 2.938399334                         | -2.515242914  | -3.336286909 |
|                                                                                    | S484 | 3.379372319                         | 1.584976983   | 1.112987883  |
|                                                                                    | S485 | 0.897768194                         | -0.553034710  | -1.700223802 |
|                                                                                    | S486 | 5.415154970                         | 0.313448487   | -4.309310798 |
|                                                                                    | S487 | 3.696334424                         | -3.537756256  | 0.049603439  |
|                                                                                    | S488 | 6.164935253                         | 2.314346948   | -1.076946566 |
|                                                                                    | S489 | 6.409814144                         | -2.482777390  | -2.016629375 |
|                                                                                    | S490 | 6.453658795                         | -0.813362258  | 1.050097025  |
|                                                                                    | end  |                                     |               |              |
| <b>N2 / H2 exchange</b><br><b>2N2 associated</b><br><b>35, S=3/2</b>               |      |                                     |               |              |
| <b>Fe(139) -2.123</b>                                                              |      |                                     |               |              |
| <b>Fe(140) -0.747</b>                                                              |      |                                     |               |              |
| <b>Fe(141) -2.465</b>                                                              |      |                                     |               |              |
| <b>Fe(142) 2.829</b>                                                               |      |                                     |               |              |
| <b>Fe(143) 2.595</b>                                                               |      |                                     |               |              |
| <b>Fe(144) 1.230</b>                                                               |      |                                     |               |              |
| <b>Fe(145) 1.652</b>                                                               |      |                                     |               |              |
| 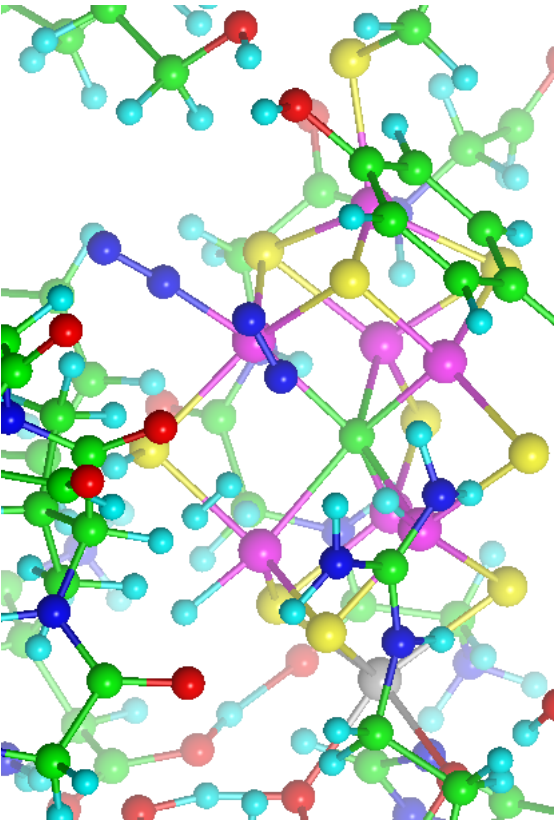 |      |                                     |               |              |
|                                                                                    |      | <b>bm52h2disn2dis2n2x3dtc.car_4</b> |               |              |
|                                                                                    | C1   | -7.740182194                        | -5.538245168  | -0.374124809 |
|                                                                                    | C2   | -7.941241446                        | -6.608733619  | -1.450688230 |
|                                                                                    | C3   | -8.788650067                        | -3.714431696  | 0.889858139  |
|                                                                                    | C4   | -8.359061109                        | -4.066130820  | 2.310635595  |
|                                                                                    | C5   | -8.181315515                        | -5.780125059  | 4.047847914  |
|                                                                                    | C6   | -6.664832896                        | -5.841424313  | 4.252638434  |
|                                                                                    | C7   | -4.446548695                        | -5.990333360  | 3.250610998  |
|                                                                                    | C8   | -3.977416056                        | -4.546469264  | 3.470128568  |
|                                                                                    | C9   | -4.400892804                        | -2.196161145  | 2.864992605  |
|                                                                                    | C10  | -4.667683179                        | -1.698068115  | 4.292887175  |
|                                                                                    | C11  | -6.051145366                        | -1.759194008  | 6.269535125  |
|                                                                                    | C12  | -5.128308758                        | -2.375141292  | 7.332650657  |
|                                                                                    | C13  | -4.250960487                        | -4.461139441  | 8.287682823  |
|                                                                                    | C14  | -2.737064527                        | -4.711704881  | 8.192207275  |
|                                                                                    | C15  | -0.847465768                        | -5.335017714  | 6.739725097  |
|                                                                                    | C16  | -0.057073274                        | -4.134540884  | 6.208574300  |
|                                                                                    | C17  | -0.262113944                        | -1.865553040  | 5.236569921  |
|                                                                                    | C18  | -0.294384470                        | -0.725670617  | 6.279370948  |
|                                                                                    | C19  | -0.965175621                        | -1.573646423  | 3.890577287  |
|                                                                                    | C20  | -0.698060967                        | -0.176825990  | 3.311635821  |
|                                                                                    | C21  | -0.624501168                        | -2.678131154  | 2.882386270  |
|                                                                                    | C22  | -1.613871329                        | 0.942590261   | 7.507453008  |
|                                                                                    | C23  | -1.472236027                        | 0.516712236   | 8.981872957  |
|                                                                                    | C24  | -2.909888713                        | 1.747255042   | 7.236345877  |
|                                                                                    | C25  | -3.132197936                        | 2.826209056   | 8.301797832  |
|                                                                                    | C26  | -2.868227081                        | 2.380249606   | 5.838614491  |
|                                                                                    | C27  | -2.181598582                        | -0.930587389  | 10.793360441 |
|                                                                                    | C28  | -0.771798228                        | -1.184829137  | 11.287966139 |
|                                                                                    | C29  | 5.431457105                         | -11.815770866 | 3.758267140  |
|                                                                                    | C30  | 6.123905521                         | -10.499260703 | 3.425204937  |
|                                                                                    | C31  | 6.254470917                         | -8.119582507  | 4.148335453  |
|                                                                                    | C32  | 7.312914910                         | -7.763147663  | 5.209412651  |
|                                                                                    | C33  | 5.008988959                         | -7.225820126  | 4.265067211  |
|                                                                                    | C34  | 5.318443174                         | -5.750277613  | 4.036774603  |
|                                                                                    | C35  | 4.050631443                         | -4.921828792  | 3.833238046  |
|                                                                                    | C36  | 4.265760531                         | -2.440489425  | 4.115063585  |
|                                                                                    | C37  | 9.524923706                         | -6.775896410  | 5.582671551  |
|                                                                                    | C38  | 9.707217874                         | -5.279686703  | 5.719115089  |
|                                                                                    | C39  | -4.983376574                        | -2.591803736  | -2.618382235 |
|                                                                                    | C40  | -5.449017239                        | -1.203469159  | -2.140370324 |
|                                                                                    | C41  | -3.472276221                        | -2.716871024  | -2.315610653 |
|                                                                                    | C42  | -2.870435824                        | -4.130347182  | -2.449043124 |
|                                                                                    | C43  | -2.368831352                        | -4.509161664  | -3.842426212 |
|                                                                                    | C44  | -5.799788213                        | 1.103143011   | -2.941911090 |
|                                                                                    | C45  | -7.039313041                        | 1.483433634   | -2.121898973 |
|                                                                                    | C46  | -5.752232482                        | 1.812924472   | -4.301914393 |
|                                                                                    | C47  | -9.329149639                        | 0.886886831   | -1.484695138 |
|                                                                                    | C48  | -9.176486451                        | 0.788571563   | 0.037177995  |
|                                                                                    | C49  | -7.756541497                        | 0.147139317   | 1.929520672  |
|                                                                                    | C50  | -6.645256574                        | 1.087816486   | 2.397244139  |
|                                                                                    | C51  | -5.007765508                        | 2.820968919   | 1.852266054  |
|                                                                                    | C52  | -5.575478918                        | 4.071235734   | 2.565666599  |
|                                                                                    | C53  | -4.226654091                        | 3.360926132   | 0.644630842  |
|                                                                                    | C54  | -3.451664108                        | 2.377953000   | -0.166433047 |
|                                                                                    | C55  | -3.019777223                        | 1.093462755   | 0.044455025  |
|                                                                                    | C56  | -2.274502300                        | 1.735640808   | -1.955080257 |
|                                                                                    | C57  | -7.397836656                        | 5.729699435   | 2.514989105  |
|                                                                                    | C58  | -7.518275826                        | 5.795908928   | 4.036007403  |
|                                                                                    | C59  | -8.794895948                        | 5.805916513   | 1.850386749  |
|                                                                                    | C60  | -9.411258486                        | 7.169219833   | 1.728998979  |
|                                                                                    | C61  | -9.504238129                        | 8.203812911   | 2.639445113  |
|                                                                                    | C62  | -10.499919287                       | 8.756297822   | 0.738448058  |
|                                                                                    | C63  | 8.556125671                         | 1.475246538   | 4.905151391  |
|                                                                                    | C64  | 9.613009872                         | 0.390388530   | 4.804621827  |

|       |              |               |              |
|-------|--------------|---------------|--------------|
| C65   | 7.215416924  | 0.839262159   | 4.461348629  |
| C66   | 6.049128336  | 1.790588561   | 4.575485554  |
| C67   | 5.295051317  | 1.887262547   | 5.759752670  |
| C68   | 5.694935203  | 2.625105773   | 3.500554696  |
| C69   | 4.219499997  | 2.775871104   | 5.868192773  |
| C70   | 4.640046953  | 3.530839468   | 3.601598859  |
| C71   | 3.892832024  | 3.596231530   | 4.781357206  |
| C72   | 5.387598425  | 6.972753556   | -0.042568303 |
| C73   | 4.357951397  | 8.079011649   | -0.326107655 |
| C74   | 4.695907610  | 5.616587403   | 0.079976405  |
| C75   | 3.586771371  | 9.781848189   | -1.940450180 |
| C76   | 2.167174122  | 9.405364341   | -2.370908921 |
| C77   | 0.599928871  | 7.499843459   | -2.729876474 |
| C78   | -0.083376592 | 7.039519406   | -1.416087374 |
| C79   | 0.801719744  | 6.329762537   | -3.721276360 |
| C80   | -0.401640794 | 5.458738306   | -4.100188269 |
| C81   | -1.400326814 | 6.053785063   | -5.106268030 |
| C82   | -3.022525120 | 7.912068253   | -4.736523370 |
| C83   | 0.115047950  | 5.935927731   | 0.762188371  |
| C84   | -0.227302823 | 7.080401862   | 1.726099567  |
| C85   | 1.037667736  | 4.948019194   | 1.511043295  |
| C86   | 0.679944511  | 9.085187205   | 2.796791276  |
| C87   | 0.057930623  | 10.440795293  | 2.499416625  |
| C88   | -1.089847345 | 11.819339572  | 0.849208709  |
| C89   | -2.460757949 | 12.317090222  | 1.366280476  |
| C90   | -1.001661754 | 11.942707934  | -0.674182583 |
| C91   | -2.039202899 | 11.123573158  | -1.432366417 |
| C92   | -4.606898224 | 11.716451224  | 2.383947036  |
| C93   | -4.707022898 | 12.735289921  | 3.510190094  |
| C94   | -5.331906626 | 10.402926735  | 2.794220454  |
| C95   | -5.384362552 | 9.406821351   | 1.658086271  |
| C96   | -6.426948492 | 9.463595077   | 0.719508856  |
| C97   | -4.373933003 | 8.450900582   | 1.467564578  |
| C98   | -6.446567304 | 8.618588573   | -0.391218155 |
| C99   | -4.364051067 | 7.612591118   | 0.347938617  |
| C100  | -5.403032447 | 7.709323734   | -0.572819189 |
| C101  | 5.551700885  | -3.278350579  | -8.517203524 |
| C102  | 4.068085115  | -3.070362684  | -8.270457242 |
| C103  | 2.391042901  | -1.641449256  | -7.125611783 |
| C104  | 1.955885110  | -0.253977176  | -7.611782021 |
| C105  | 2.302530797  | 2.162963715   | -7.323276043 |
| C106  | 3.475684195  | 3.138543071   | -7.260124791 |
| C107  | 5.643548499  | 3.770584950   | -6.354595362 |
| C108  | 6.409972595  | 4.101136291   | -7.619290447 |
| C109  | -1.208701503 | -2.824038390  | -9.746458524 |
| C110  | -2.295627417 | -1.772930176  | -9.495653024 |
| C111  | -0.928583929 | -3.599109405  | -8.438347153 |
| C112  | -0.116425960 | -4.880680697  | -8.701774728 |
| C113  | 0.352251291  | -5.483642502  | -7.395146852 |
| C114  | -2.841876599 | 0.491268656   | -8.754675718 |
| C115  | -2.303496813 | 1.823155804   | -9.239215679 |
| C116  | -3.427312901 | 0.511363112   | -7.320665170 |
| C117  | -2.338736657 | 0.466586058   | -6.284003175 |
| C118  | -1.669455269 | 1.638126435   | -5.891800483 |
| C119  | -1.877337252 | -0.770749932  | -5.802461748 |
| C120  | -0.522714736 | 1.563784690   | -5.096129767 |
| C121  | -0.733646060 | -0.843772933  | -5.004184349 |
| C122  | -0.034400328 | 0.322435755   | -4.678407261 |
| C123  | 8.717641422  | -5.823420541  | -3.897824340 |
| C124  | 9.725544427  | -5.961734811  | -2.747827984 |
| C125  | 7.311904312  | -6.224012741  | -3.424711946 |
| C126  | 6.198137130  | -5.986917621  | -4.391643313 |
| C127  | 6.049470391  | -6.532426238  | -5.650363875 |
| C128  | 4.194584963  | -5.463502797  | -5.091941625 |
| C129  | 10.650215895 | -7.283648697  | -0.942660013 |
| C130  | 12.082680062 | -6.949576286  | -1.295608130 |
| C131  | 0.757984568  | -6.820091094  | -0.625122064 |
| C132  | 2.180307065  | -6.896159518  | -0.078516791 |
| C133  | 3.293138051  | -6.937811953  | -1.169472055 |
| C134  | 3.334898242  | -8.347420048  | -1.818551969 |
| C135  | 4.539590534  | -8.612996671  | -2.723310454 |
| C136  | 4.646914001  | -10.067975936 | -3.230542462 |
| C137  | 4.651555423  | -6.675758628  | -0.497771733 |
| C138  | 3.889920199  | -0.510198881  | -1.703436486 |
| Fe139 | 4.444091618  | -1.649105797  | -3.205605373 |
| Fe140 | 2.334407393  | 0.920083715   | -1.102774978 |
| Fe141 | 5.189259663  | 0.609898713   | -0.700803049 |
| Fe142 | 4.291982908  | 0.875909333   | -3.106585619 |
| Fe143 | 4.111806647  | 2.904290845   | -1.437451802 |
| Fe144 | 4.814074798  | -1.901170324  | -0.687401696 |
| Fe145 | 2.444174321  | -2.222690009  | -1.608577463 |
| H146  | -6.154480120 | -7.566289868  | -1.228062287 |

|      |              |              |               |
|------|--------------|--------------|---------------|
| H147 | -6.168562514 | -6.496438842 | -2.459910005  |
| H148 | -9.714182868 | -4.979061640 | -0.559940430  |
| H149 | -8.536380841 | -6.176724313 | -2.271341653  |
| H150 | -8.571268529 | -7.397007134 | -1.002657812  |
| H151 | -8.073437393 | -2.962196121 | 0.525162301   |
| H152 | -9.051551815 | -5.978465252 | 2.091609925   |
| H153 | -9.779129604 | -3.241662808 | 0.935070282   |
| H154 | -8.602141798 | -6.779358251 | 4.221684894   |
| H155 | -6.331292278 | -6.124843787 | 2.236029201   |
| H156 | -8.571042855 | -5.107237154 | 4.823077598   |
| H157 | -3.368814761 | -1.922688739 | 2.613810463   |
| H158 | -5.306112686 | -3.938850821 | 2.028436267   |
| H159 | -4.009059449 | -6.380637373 | 2.321256346   |
| H160 | -5.946874890 | -0.668989664 | 6.346775384   |
| H161 | -6.461218161 | -2.717296222 | 4.377437813   |
| H162 | -4.076194908 | -6.593477639 | 4.088373534   |
| H163 | -5.065818435 | -1.680317542 | 2.158782794   |
| H164 | -5.336482452 | -4.229873386 | 6.460646130   |
| H165 | -7.087915791 | -2.033310817 | 6.508398353   |
| H166 | -0.986862090 | -3.657303819 | 3.218981815   |
| H167 | -1.082740313 | -2.469989171 | 1.901885239   |
| H168 | 0.461378599  | -2.743306912 | 2.727978535   |
| H169 | -2.037679106 | -1.620844033 | 4.111832882   |
| H170 | -4.748341890 | -5.440948249 | 8.346791080   |
| H171 | -2.748140087 | 1.630632528  | 5.045303961   |
| H172 | -2.917112702 | -0.972298279 | 8.789721794   |
| H173 | -3.268017988 | 2.401064403  | 9.306683543   |
| H174 | 0.151491643  | -0.179961613 | 2.621544553   |
| H175 | -0.507195140 | 0.581902048  | 4.082578912   |
| H176 | 8.460314295  | 1.746602383  | 5.973536365   |
| H177 | -3.803491014 | 2.923153275  | 5.640879172   |
| H178 | -4.031009697 | 3.409983295  | 8.055315759   |
| H179 | -2.036164284 | 3.100005820  | 5.767088173   |
| H180 | -2.277287171 | 3.519558245  | 8.339033384   |
| H181 | -3.758006235 | 1.040517850  | 7.276597994   |
| H182 | -0.747382836 | 1.597923827  | 7.333158502   |
| H183 | -2.340244428 | -0.477538616 | 6.064250149   |
| H184 | -1.578610745 | 0.165733884  | 2.747509988   |
| H185 | 1.487941184  | 4.264374248  | 0.776210428   |
| H186 | 0.400985824  | 4.362750998  | 2.189554439   |
| H187 | 2.163122823  | 5.197082708  | 3.111060856   |
| H188 | 2.345335633  | 4.378939635  | 5.648823781   |
| H189 | 4.358744957  | 4.153065769  | 2.7516660318  |
| H190 | 6.237106545  | 2.545774218  | 2.555808991   |
| H191 | 5.544417361  | 1.251721373  | 6.614339118   |
| H192 | -1.822726153 | -3.219563980 | 5.757376936   |
| H193 | -0.726506066 | -6.157962947 | 6.019611421   |
| H194 | -0.380090156 | -5.643235822 | 7.683833176   |
| H195 | -2.876272020 | -5.079194501 | 6.153585944   |
| H196 | -4.413101689 | -3.929165967 | 9.232470081   |
| H197 | 3.625650900  | 2.814945083  | 6.785206536   |
| H198 | 0.804200962  | -2.043438740 | 5.068321639   |
| H199 | -2.660808767 | -0.185421788 | 11.449035985  |
| H200 | -2.733054148 | -1.878757436 | 10.890725308  |
| H201 | -0.048222394 | -1.508490446 | 10.503986595  |
| H202 | 10.469845470 | -7.226179612 | 5.241582208   |
| H203 | -0.969339504 | -5.659930220 | -4.792129502  |
| H204 | 1.650498440  | -5.895025046 | -2.070496434  |
| H205 | -0.755576513 | -5.618804298 | -9.207627590  |
| H206 | 0.742360215  | -4.663368565 | -9.352630734  |
| H207 | -1.875927070 | -3.873773697 | -7.948970655  |
| H208 | -1.580025721 | 1.744103431  | -10.084116938 |
| H209 | -1.680894905 | -3.524049065 | -10.452321614 |
| H210 | -2.926931914 | -2.015871195 | -2.969330158  |
| H211 | -3.617418033 | -4.887388761 | -2.153985165  |
| H212 | -0.889330891 | -0.402907786 | -8.813009577  |
| H213 | -3.688113806 | 0.283861045  | -9.441631915  |
| H214 | 0.542872973  | -1.704246885 | -9.781822186  |
| H215 | -0.812251782 | -5.645616887 | -3.039300659  |
| H216 | -0.394576148 | -2.937841992 | -7.737684430  |
| H217 | 0.537821371  | -2.988312962 | -10.812534271 |
| H218 | -6.140736703 | -3.281788842 | -4.183658574  |
| H219 | -3.324722089 | -2.387922739 | -1.275716710  |
| H220 | 2.124584386  | -4.703126383 | -7.729439405  |
| H221 | -2.043493481 | -4.238407803 | -1.731108512  |
| H222 | -4.338251199 | 2.339160873  | 2.578748912   |
| H223 | -3.170889770 | 0.416854815  | 0.875980811   |
| H224 | -8.667383073 | 0.439577717  | 2.469869963   |
| H225 | -7.357053212 | -0.201227701 | -0.138740538  |
| H226 | -7.306461614 | 3.855397618  | 1.485266302   |
| H227 | -9.130759792 | 8.324043501  | 3.650110278   |
| H228 | -7.707029674 | 4.804989814  | 4.515524551   |

|      |               |              |              |
|------|---------------|--------------|--------------|
| H229 | -9.475616411  | 5.107013962  | 2.367774507  |
| H230 | -6.769544848  | 6.568806396  | 2.175696853  |
| H231 | -11.049184905 | 9.357632884  | 0.017962520  |
| H232 | -3.529985707  | 4.124150407  | 1.029427176  |
| H233 | -4.932243650  | 3.878703771  | -0.024719905 |
| H234 | -10.430517670 | 10.114439368 | 2.376438702  |
| H235 | -8.687327707  | 5.426690623  | 0.822055841  |
| H236 | -6.372514392  | 1.870554590  | 0.484297048  |
| H237 | -7.504462030  | -0.871076911 | 2.261355625  |
| H238 | -9.744375006  | 1.884790050  | -1.683921174 |
| H239 | -1.773652938  | 1.724344953  | -2.921067580 |
| H240 | -10.072839140 | 0.146100950  | -1.805998601 |
| H241 | 9.695365721   | 3.115947341  | 4.454903651  |
| H242 | 8.142776129   | 3.243487686  | 3.961524962  |
| H243 | 1.647619211   | 6.078074415  | -0.749900607 |
| H244 | -0.832902627  | 5.422723148  | 0.546820666  |
| H245 | 1.507722839   | 8.020999056  | 1.168837095  |
| H246 | -3.232901862  | 3.637936022  | -1.910469841 |
| H247 | -4.686138866  | 4.330460352  | -3.283067809 |
| H248 | -6.014313819  | 3.642699301  | -4.956937599 |
| H249 | -4.554779525  | 5.511116800  | -2.221378994 |
| H250 | -4.824942363  | 1.508763723  | -4.814875341 |
| H251 | -6.614434856  | 1.507676645  | -4.914430275 |
| H252 | 0.020205908   | 11.706898692 | -1.002112079 |
| H253 | -1.189482729  | 12.998836608 | -0.924813872 |
| H254 | -0.565312504  | 10.401869716 | -2.699324723 |
| H255 | -2.218140687  | 9.863585247  | -2.995850325 |
| H256 | -2.894898562  | 9.587887746  | -5.908950066 |
| H257 | -1.783092112  | 5.259710434  | -5.765202738 |
| H258 | -7.273288636  | 8.663387751  | -1.104495486 |
| H259 | -3.566746686  | 8.337257060  | 2.196614605  |
| H260 | -4.298462437  | 7.951799002  | -3.116855724 |
| H261 | 1.560360281   | 5.661528294  | -3.282477759 |
| H262 | 2.684728724   | 7.435480356  | -2.293373815 |
| H263 | -0.936315658  | 5.112905501  | -3.201304269 |
| H264 | -8.031156754  | -0.149012265 | -2.847137424 |
| H265 | 4.060378818   | 10.326594050 | -2.767219108 |
| H266 | -5.510952566  | -0.764003888 | -4.083536768 |
| H267 | 1.252291760   | 6.747977914  | -4.636871514 |
| H268 | -3.534466558  | 6.922519590  | 0.186038911  |
| H269 | 3.472594120   | 10.482606143 | -1.100349164 |
| H270 | -2.058449988  | 8.209103467  | -6.532608359 |
| H271 | -4.550373387  | 9.200520594  | -4.291929655 |
| H272 | -4.497994477  | -3.279662568 | -4.497840321 |
| H273 | -5.513569276  | -3.322144153 | -1.979481137 |
| H274 | -7.241809253  | 10.178499872 | 0.856458001  |
| H275 | -4.958059589  | 1.461636997  | -2.332298825 |
| H276 | -0.049651247  | 8.274097470  | -3.154044899 |
| H277 | -0.884057102  | 6.781858251  | -5.744766766 |
| H278 | 0.016851275   | 4.556800673  | -4.568743564 |
| H279 | -3.078535519  | 6.110512991  | -3.791660522 |
| H280 | 0.157728926   | 8.663401489  | 3.668277986  |
| H281 | -0.643425733  | 9.715334585  | 0.721297667  |
| H282 | -0.384307310  | 12.551064286 | 1.272229602  |
| H283 | 1.725646129   | 9.266659442  | 3.082344299  |
| H284 | -2.909905379  | 10.459237913 | 2.045147444  |
| H285 | 6.072319977   | -2.309424185 | -8.514161635 |
| H286 | 5.922235231   | -3.845524824 | -7.638097370 |
| H287 | 8.718657571   | -4.753484761 | -4.155338890 |
| H288 | 6.735206615   | -4.275531738 | -9.841473797 |
| H289 | 5.182253823   | -4.791404856 | -9.826122263 |
| H290 | 5.466850563   | 4.862323282  | 0.281963689  |
| H291 | 5.453162717   | 7.410761599  | 1.952486404  |
| H292 | 5.177123736   | 8.379214596  | -2.189318517 |
| H293 | 3.980098391   | 5.641127592  | 0.914086739  |
| H294 | 6.664220320   | 8.105155300  | 1.103666164  |
| H295 | 6.360226660   | 3.344323815  | -5.636143852 |
| H296 | 6.115658479   | 6.929827310  | -0.867470301 |
| H297 | 4.545674302   | -7.380986129 | 5.253615317  |
| H298 | 6.682675387   | -8.009480687 | 3.143468924  |
| H299 | 4.664984711   | 1.895567572  | -6.078510273 |
| H300 | 4.693330816   | -0.446571465 | 4.083193514  |
| H301 | 1.902392501   | 2.187976001  | -8.343784767 |
| H302 | -0.376526054  | -1.812307707 | -4.646875396 |
| H303 | 1.522357510   | 2.586349357  | -6.667219550 |
| H304 | 3.451423066   | -4.881486606 | 4.750608138  |
| H305 | 3.135912340   | 0.539188332  | -6.152014026 |
| H306 | 3.418091757   | -5.374549976 | 3.054172960  |
| H307 | 4.294401863   | -7.574449066 | 3.502114791  |
| H308 | 5.943103466   | -5.642784062 | 3.137290621  |
| H309 | 5.893161943   | -5.332303393 | 4.879069650  |
| H310 | -4.093604596  | -0.357922163 | -7.220963065 |



|       |              |               |              |
|-------|--------------|---------------|--------------|
| H311  | 5.263114472  | -9.790653879  | 5.084815264  |
| H312  | 4.619539791  | -11.924966830 | 3.023169431  |
| H313  | 0.883269941  | 0.280711148   | -4.094743804 |
| H314  | 5.546039377  | -12.200246046 | 5.779600650  |
| H315  | 4.063883127  | -12.485031365 | 5.145303618  |
| H316  | 5.062489847  | -3.531857149  | 2.620791796  |
| H317  | 0.012140973  | 2.468955482   | -4.802816743 |
| H318  | -2.406522497 | -1.688853890  | -6.067191852 |
| H319  | 7.998424639  | -9.725376418  | -1.135209002 |
| H320  | 7.311634491  | -7.299301634  | -3.176404768 |
| H321  | 6.705649937  | -8.091430848  | 0.359613765  |
| H322  | 7.335725786  | -10.257371261 | -2.435747454 |
| H323  | 6.311588592  | 3.354490992   | -8.443573858 |
| H324  | 6.371336276  | -4.946732888  | 0.450254323  |
| H325  | 2.260820612  | -7.760405219  | 0.592804099  |
| H326  | 4.495197430  | -1.413503313  | -7.145967002 |
| H327  | 3.339348083  | -9.075490945  | -0.992303187 |
| H328  | 4.336248379  | -6.477106838  | -6.935241920 |
| H329  | 3.178727368  | -5.099851504  | -5.160538464 |
| H330  | 6.154794948  | -12.622459521 | 3.552613350  |
| H331  | 5.483954309  | -1.343083107  | 2.859975236  |
| H332  | 8.202058231  | -5.776996407  | 1.719113880  |
| H333  | 7.180971034  | -3.676696247  | 0.817295074  |
| H334  | 8.515311426  | -6.969967497  | 3.698605368  |
| H335  | 2.774538845  | -3.104374975  | 5.433273827  |
| H336  | 4.483024615  | -7.960742910  | -3.608130491 |
| H337  | 5.472069223  | -8.361199676  | -2.199878926 |
| H338  | 2.399868890  | -8.502913785  | -2.378591893 |
| H339  | 2.341168988  | -1.698140888  | -6.026670149 |
| H340  | -2.030263043 | 2.604990024   | -6.249899736 |
| H341  | -4.035663358 | 1.424283853   | -7.233698041 |
| H342  | 2.311964995  | -5.990407554  | 0.536827776  |
| H343  | 8.421092534  | -7.288277096  | 1.411053919  |
| H344  | 7.367546204  | -9.222633049  | 1.178069896  |
| H345  | 3.409819567  | -1.519096305  | 5.735202296  |
| H346  | 6.718580678  | -7.139817716  | -6.246644125 |
| H347  | 7.086443874  | -5.699603128  | -2.488710399 |
| H348  | 1.710387239  | -2.379722659  | -7.555187545 |
| H349  | 5.252219335  | 4.702812086   | -5.917953218 |
| H350  | 7.046181758  | -0.046121250  | 5.090534625  |
| H351  | 7.321953000  | 0.498471677   | 3.418818556  |
| H352  | 10.046260783 | -6.237245716  | -5.404508291 |
| H353  | 9.239617805  | -7.560827069  | -4.880622288 |
| H354  | 10.631710694 | -8.338796258  | -0.627801605 |
| H355  | 9.119484398  | -7.920569845  | -2.282469156 |
| H356  | 12.354680547 | -7.120088438  | -2.365082474 |
| H357  | 10.328108070 | -6.673032182  | -0.084087511 |
| H358  | 10.061437945 | 0.276370547   | 3.787884653  |
| H359  | -3.808646047 | 12.802016208  | 4.168613439  |
| H360  | 9.311837495  | -7.168365313  | 6.591956600  |
| H361  | 8.795502529  | -4.666646790  | 5.511771771  |
| H362  | -5.113564664 | 12.145823179  | 1.504142943  |
| H363  | -4.824176335 | 9.968707639   | 3.669717426  |
| H364  | -6.350332219 | 10.676606573  | 3.105900924  |
| H365  | 1.304095741  | -3.147811611  | -1.211907208 |
| H366  | 4.277975457  | -1.467006614  | 0.645306936  |
| H367  | -6.254017486 | 6.886146675   | -2.119585347 |
| H368  | 0.238422941  | -0.956791815  | -0.449621972 |
| H369  | 1.907823941  | -1.230153163  | 1.438572495  |
| H370  | 1.410722072  | -1.701433239  | 1.136100091  |
| H371  | -1.777595949 | -0.143795053  | -1.210362822 |
| Mo372 | 4.251333895  | -4.151546543  | -2.124692493 |
| N373  | -6.734360722 | -7.208209602  | -1.991240652 |
| N374  | -8.862386646 | -4.846580737  | -0.019990625 |
| N375  | -8.596235251 | -5.330297966  | 2.729965462  |
| N376  | -5.898419136 | -6.089437386  | 3.161098223  |
| N377  | -4.606997353 | -3.625853778  | 2.698685388  |
| N378  | -5.763973428 | -2.191850511  | 4.912080649  |
| N379  | -4.875574833 | -3.704787876  | 7.209165266  |
| N380  | -2.261961544 | -5.094787267  | 6.971988201  |
| N381  | -0.812422626 | -3.098291186  | 5.785801204  |
| N382  | -1.508262866 | -0.194597832  | 6.589108599  |
| N383  | -2.212291353 | -0.542766450  | 9.394660334  |
| N384  | 4.858754166  | -11.845263475 | 5.111384403  |
| N385  | 5.857277670  | -9.508608904  | 4.297554280  |
| N386  | 4.406416348  | -3.566408974  | 3.406039980  |
| N387  | 3.435978142  | -2.363891315  | 5.170344668  |
| N388  | 5.003614209  | -1.361407333  | 3.769321086  |
| N389  | 8.420166335  | -7.148907912  | 4.722877242  |
| N390  | -5.273278697 | -2.759393280  | -4.047323156 |
| N391  | -1.324475726 | -5.356042353  | -3.879224705 |
| N392  | -5.662520309 | -0.327587295  | -3.157988616 |

|      |               |               |               |
|------|---------------|---------------|---------------|
| N393 | -8.115706242  | 0.676164155   | -2.257170952  |
| N394 | -8.060778238  | 0.166062925   | 0.510675616   |
| N395 | -6.036671804  | 1.869059933   | 1.451821617   |
| N396 | -2.972479779  | 2.744168745   | -1.417789531  |
| N397 | -2.302654742  | 0.724292961   | -1.077875398  |
| N398 | -6.802660912  | 4.456007182   | 2.133011237   |
| N399 | -10.037575641 | 7.526731789   | 0.546028778   |
| N400 | -10.195702301 | 9.204196165   | 1.989080284   |
| N401 | 8.927854740   | 2.589341861   | 4.029859896   |
| N402 | 6.129475778   | 7.237454995   | 1.201563218   |
| N403 | 4.447302328   | 8.680567004   | -1.549177969  |
| N404 | 1.913975180   | 8.084866091   | -2.484829679  |
| N405 | -2.547726428  | 6.698293268   | -4.460154465  |
| N406 | -2.544668164  | 8.647147696   | -5.758410914  |
| N407 | -3.941454887  | 8.476033470   | -3.919796375  |
| N408 | 0.697208513   | 6.400230058   | -0.499687322  |
| N409 | 0.640449088   | 8.131381308   | 1.702955499   |
| N410 | -0.671834970  | 10.521391931  | 1.345408701   |
| N411 | -1.576667640  | 10.526285941  | -2.564313457  |
| N412 | -3.216305412  | 11.428761567  | 2.059718480   |
| N413 | 5.766562614   | -3.950665095  | -9.801333373  |
| N414 | 3.741941022   | -1.965482263  | -7.566170526  |
| N415 | 2.560892449   | 0.776339322   | -6.977530919  |
| N416 | 4.588497893   | 2.793340521   | -6.564168611  |
| N417 | -0.045922391  | -2.242435226  | -10.428385731 |
| N418 | -1.880197918  | -0.564214975  | -9.015761280  |
| N419 | 9.125206853   | -6.567177353  | -5.103032790  |
| N420 | 5.028052489   | -5.305268489  | -4.062078478  |
| N421 | 4.784818535   | -6.187101933  | -6.070222067  |
| N422 | 9.761828527   | -7.148688736  | -2.083363786  |
| N423 | 0.064588816   | 2.310412483   | 0.130784311   |
| N424 | 2.161970244   | 1.264980666   | 3.564646697   |
| N425 | 0.968465045   | 1.804097826   | -0.326078135  |
| N426 | 2.652605266   | 0.401704854   | 3.068129803   |
| O427 | -6.647452933  | -5.330358119  | 0.184039325   |
| O428 | -7.816003179  | -3.207280219  | 3.028628890   |
| O429 | -6.188831841  | -5.680371449  | 5.388891149   |
| O430 | -3.099664317  | -4.248336293  | 4.300027184   |
| O431 | -3.901394652  | -0.893555886  | 4.843635625   |
| O432 | -4.697895584  | -1.682907019  | 8.271168158   |
| O433 | -2.028047584  | -4.621590449  | 9.202065894   |
| O434 | 1.189056220   | -4.169453791  | 6.167890999   |
| O435 | 0.762367597   | -0.334000898  | 6.798479242   |
| O436 | -0.721121785  | 1.128671759   | 9.760385892   |
| O437 | -0.453953497  | -1.116270085  | 12.466021926  |
| O438 | 6.834422852   | -10.405353063 | 2.403919509   |
| O439 | 7.127971563   | -8.025819415  | 6.410723222   |
| O440 | 10.761123160  | -4.758692772  | 6.049619173   |
| O441 | -5.587535597  | -0.903668650  | -0.938220539  |
| O442 | -2.917160047  | -4.078925859  | -4.883639042  |
| O443 | -7.022053661  | 2.469014238   | -1.363126139  |
| O444 | -5.776835644  | 3.239738724   | -4.102561593  |
| O445 | -10.062271422 | 1.260446325   | 0.762318229   |
| O446 | -6.328336849  | 1.121274622   | 3.589734006   |
| O447 | -4.908077810  | 4.710154458   | 3.383967315   |
| O448 | -7.468883886  | 6.825158912   | 4.686546702   |
| O449 | 9.949478401   | -0.328847205  | 5.734046197   |
| O450 | 2.829182646   | 4.475796221   | 4.808047902   |
| O451 | 3.503002282   | 8.420265462   | 0.509210877   |
| O452 | 1.338477832   | 10.308886672  | -2.595486530  |
| O453 | -1.292926709  | 7.253685112   | -1.236007091  |
| O454 | -1.189422999  | 6.994283719   | 2.500441481   |
| O455 | 2.063322267   | 5.628156543   | 2.238063397   |
| O456 | 0.207705613   | 11.391593944  | 3.276828604   |
| O457 | -2.803033222  | 13.494660032  | 1.187900132   |
| O458 | -3.222815750  | 11.059493012  | -1.071745146  |
| O459 | -5.705377380  | 13.408255310  | 3.712927564   |
| O460 | -5.361272106  | 6.894304568   | -1.724100038  |
| O461 | 3.228421607   | -3.909687311  | -8.677012008  |
| O462 | 1.127874030   | -0.107820704  | -8.533978662  |
| O463 | 3.358466724   | 4.249725193   | -7.801604997  |
| O464 | 7.114360858   | 5.091399346   | -7.732199745  |
| O465 | -3.495865234  | -2.021710560  | -9.695443344  |
| O466 | -0.380794206  | -6.129029031  | -6.652699353  |
| O467 | 1.626739440   | -5.236656809  | -7.035213949  |
| O468 | -2.646036427  | 2.911502332   | -8.798879763  |
| O469 | 10.510592605  | -5.040737420  | -2.448731515  |
| O470 | 12.916926208  | -6.593864369  | -0.474945629  |
| O471 | 0.629867556   | -6.136537540  | -1.767261233  |
| O472 | -0.209717928  | -7.300617968  | -0.035741712  |
| O473 | 5.809728328   | -10.604892524 | -3.218788761  |
| O474 | 3.591146056   | -10.618028457 | -3.653591317  |

|                         |      |              |                                     |              |
|-------------------------|------|--------------|-------------------------------------|--------------|
|                         | O475 | 5.322794784  | -5.636320560                        | -0.923429303 |
|                         | O476 | 5.072321698  | -7.437773896                        | 0.393633424  |
|                         | O477 | 3.028260701  | -5.913528561                        | -2.133284567 |
|                         | O478 | 8.767719778  | -6.545505006                        | 1.980345829  |
|                         | O479 | 6.859801747  | -4.516283025                        | 1.198975314  |
|                         | O480 | -4.028726085 | 4.895855426                         | -2.795277954 |
|                         | O481 | 8.227910324  | -10.155782471                       | -1.987969975 |
|                         | O482 | 7.580880610  | -8.545864092                        | 0.486768125  |
|                         | S483 | 3.784160630  | 5.145160205                         | -1.463567361 |
|                         | S484 | 2.519955676  | 2.246948021                         | -2.905509957 |
|                         | S485 | 2.739084573  | -3.038612041                        | -3.607460997 |
|                         | S486 | 3.738194323  | 1.856044688                         | 0.458646787  |
|                         | S487 | 0.784954435  | -0.693714651                        | -1.670871282 |
|                         | S488 | 4.922187887  | -0.295896537                        | -4.887856790 |
|                         | S489 | 3.399117312  | -3.443111357                        | -0.045564006 |
|                         | S490 | 6.062771124  | 2.012006686                         | -2.190562590 |
|                         | S491 | 6.159576624  | -2.765546635                        | -2.324253869 |
|                         | S492 | 6.422810482  | -0.757744487                        | 0.473569299  |
|                         | end  |              |                                     |              |
| <b>N2 / H2 exchange</b> |      |              | <b>bm52h2disn2dis2n2x3dtb.car 4</b> |              |
| <b>2N2 dissociated</b>  | C1   | -7.710685974 | -5.522851799                        | -0.378340942 |
| <b>35, S=3/2</b>        | C2   | -7.914353017 | -6.600044446                        | -1.449113921 |
|                         | C3   | -8.780823948 | -3.711895278                        | 0.891161421  |
|                         | C4   | -8.357853310 | -4.066793181                        | 2.313162075  |
|                         | C5   | -8.183695926 | -5.785699859                        | 4.045390630  |
|                         | C6   | -6.667893487 | -5.845396368                        | 4.255687915  |
|                         | C7   | -4.44744501  | -5.991146750                        | 3.255808644  |
|                         | C8   | -3.980179697 | -4.546639041                        | 3.473638938  |
|                         | C9   | -4.407196237 | -2.196866055                        | 2.871709725  |
|                         | C10  | -4.671659107 | -1.702072454                        | 4.301436234  |
|                         | C11  | -6.055148627 | -1.765557634                        | 6.278617369  |
|                         | C12  | -5.130784831 | -2.381965697                        | 7.340233011  |
|                         | C13  | -4.250370890 | -4.467666092                        | 8.292264379  |
|                         | C14  | -2.734528768 | -4.707740313                        | 8.195451318  |
|                         | C15  | -0.840659467 | -5.314710238                        | 6.73907628   |
|                         | C16  | -0.047578863 | -4.120336577                        | 6.196621251  |
|                         | C17  | -0.252545653 | -1.855721290                        | 5.200730073  |
|                         | C18  | -0.282234836 | -0.718527251                        | 6.248250174  |
|                         | C19  | -0.967420373 | -1.567867314                        | 3.864752604  |
|                         | C20  | -0.700909914 | -0.173249359                        | 3.284336262  |
|                         | C21  | -0.637184164 | -2.676887857                        | 2.857549430  |
|                         | C22  | -1.601947122 | 0.943980121                         | 7.487808868  |
|                         | C23  | -1.456120243 | 0.510646970                         | 8.958703012  |
|                         | C24  | -2.902851478 | 1.744997722                         | 7.227014514  |
|                         | C25  | -3.125089301 | 2.819100908                         | 8.297893428  |
|                         | C26  | -2.870258707 | 2.384301726                         | 5.831892105  |
|                         | C27  | -2.164875491 | -0.943150377                        | 10.762267656 |
|                         | C28  | -0.758539422 | -1.192348306                        | 11.268762618 |
|                         | C29  | 5.423629353  | -11.808918920                       | 3.743881383  |
|                         | C30  | 6.123129485  | -10.495577296                       | 3.419408330  |
|                         | C31  | 6.256415612  | -8.119576184                        | 4.150577748  |
|                         | C32  | 7.314932763  | -7.762281703                        | 5.210896650  |
|                         | C33  | 5.010196164  | -7.227188140                        | 4.268142812  |
|                         | C34  | 5.320609765  | -5.752480637                        | 4.037271097  |
|                         | C35  | 4.054857585  | -4.923579572                        | 3.824559426  |
|                         | C36  | 4.279549165  | -2.445020081                        | 4.103987638  |
|                         | C37  | 9.524769330  | -6.770096035                        | 5.581248024  |
|                         | C38  | 9.704652195  | -5.273861595                        | 5.718534248  |
|                         | C39  | -4.955954351 | -2.581880284                        | -2.615749811 |
|                         | C40  | -5.430432575 | -1.195991241                        | -2.138607033 |
|                         | C41  | -3.446301111 | -2.710203198                        | -2.314075340 |
|                         | C42  | -2.854506823 | -4.127505891                        | -2.448322273 |
|                         | C43  | -2.357340913 | -4.510534043                        | -3.842710612 |
|                         | C44  | -5.799869747 | 1.105964544                         | -2.943524516 |
|                         | C45  | -7.039361862 | 1.484100276                         | -2.123297928 |
|                         | C46  | -5.750115781 | 1.816366300                         | -4.302959508 |
|                         | C47  | -9.328389062 | 0.887938542                         | -1.485547556 |
|                         | C48  | -9.177260918 | 0.787646256                         | 0.036245066  |
|                         | C49  | -7.761620064 | 0.140507071                         | 1.929678410  |
|                         | C50  | -6.647676953 | 1.077341524                         | 2.397827826  |
|                         | C51  | -5.004037794 | 2.8043056406                        | 1.847140014  |
|                         | C52  | -5.562801513 | 4.054741482                         | 2.563458810  |
|                         | C53  | -4.235130958 | 3.343315327                         | 0.632633450  |
|                         | C54  | -3.478651343 | 2.355818510                         | -0.189617192 |
|                         | C55  | -3.055049035 | 1.065264976                         | 0.011465609  |
|                         | C56  | -2.297976354 | 1.720908187                         | -1.976827302 |
|                         | C57  | -7.369499115 | 5.725007097                         | 2.503286901  |
|                         | C58  | -7.489843498 | 5.795742679                         | 4.024078082  |
|                         | C59  | -8.771455470 | 5.804594189                         | 1.846869057  |
|                         | C60  | -9.390739557 | 7.167222045                         | 1.729153736  |
|                         | C61  | -9.491703365 | 8.198557484                         | 2.642684236  |

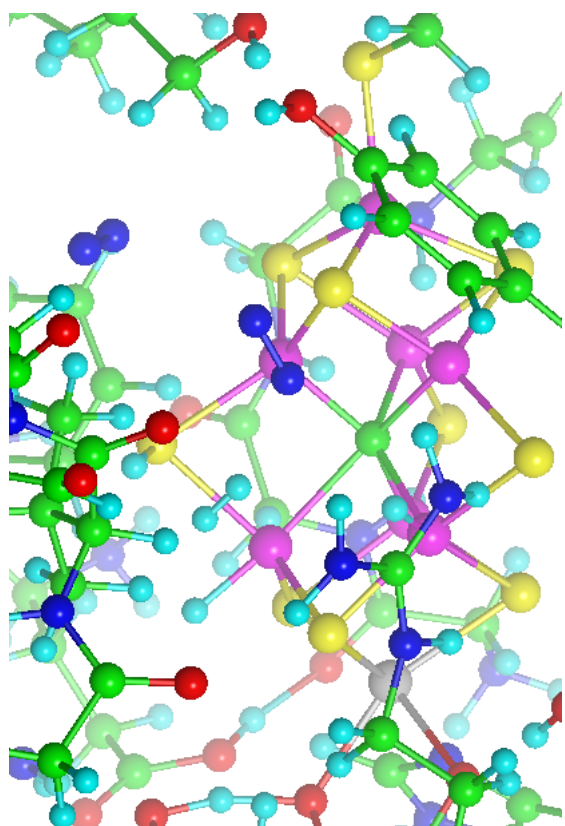

|       |               |               |              |
|-------|---------------|---------------|--------------|
| C62   | -10.487362071 | 8.750802814   | 0.741662859  |
| C63   | 8.559841193   | 1.478741733   | 4.901674014  |
| C64   | 9.616686429   | 0.394381482   | 4.798840757  |
| C65   | 7.220229254   | 0.842179357   | 4.456787572  |
| C66   | 6.052749873   | 1.792842840   | 4.568885097  |
| C67   | 5.300716366   | 1.892874394   | 5.754333634  |
| C68   | 5.694638896   | 2.622073989   | 3.490972407  |
| C69   | 4.225120678   | 2.781400074   | 5.862237612  |
| C70   | 4.638894961   | 3.526954017   | 3.591045801  |
| C71   | 3.896144148   | 3.597682655   | 4.773568490  |
| C72   | 5.386336082   | 6.982113251   | -0.045944139 |
| C73   | 4.352020984   | 8.083944403   | -0.331026141 |
| C74   | 4.704433484   | 5.618307028   | 0.077651648  |
| C75   | 3.582045226   | 9.785506240   | -1.946981781 |
| C76   | 2.163251745   | 9.407627086   | -2.377623076 |
| C77   | 0.599769087   | 7.497549466   | -2.730943794 |
| C78   | -0.074082717  | 7.033187343   | -1.413684951 |
| C79   | 0.804903176   | 6.326803288   | -3.721781718 |
| C80   | -0.396289804  | 5.453612064   | -4.102058336 |
| C81   | -1.395449713  | 6.049299962   | -5.106612431 |
| C82   | -3.017759978  | 7.907381676   | -4.734950771 |
| C83   | 0.144976450   | 5.940005049   | 0.767056485  |
| C84   | -0.212475737  | 7.084581084   | 1.725820524  |
| C85   | 1.086986042   | 4.973709688   | 1.522878677  |
| C86   | 0.685322708   | 9.087609834   | 2.803575608  |
| C87   | 0.062456153   | 10.441609382  | 2.503964935  |
| C88   | -1.081887739  | 11.813040918  | 0.848051627  |
| C89   | -2.453154654  | 12.307879515  | 1.368097665  |
| C90   | -0.996438248  | 11.937906740  | -0.675237730 |
| C91   | -2.037150574  | 11.122367995  | -1.432878306 |
| C92   | -4.597528112  | 11.702259600  | 2.381010638  |
| C93   | -4.699090907  | 12.724517900  | 3.505310266  |
| C94   | -5.326651616  | 10.392795761  | 2.791577597  |
| C95   | -5.379901744  | 9.396228679   | 1.655864585  |
| C96   | -6.420839681  | 9.454452812   | 0.715493972  |
| C97   | -4.369703617  | 8.440056513   | 1.466152514  |
| C98   | -6.439619505  | 8.610073947   | -0.395685689 |
| C99   | -4.358612818  | 7.602192011   | 0.346648831  |
| C100  | -5.396091948  | 7.700877448   | -0.575057057 |
| C101  | 5.554455208   | -3.285416844  | -8.541615097 |
| C102  | 4.072877162   | -3.073022446  | -8.282688175 |
| C103  | 2.406174368   | -1.643350913  | -7.125786010 |
| C104  | 1.971072329   | -0.255055888  | -7.605631275 |
| C105  | 2.312165557   | 2.159940862   | -7.316024611 |
| C106  | 3.481139279   | 3.140952769   | -7.266654211 |
| C107  | 5.651799380   | 3.787753036   | -6.377761454 |
| C108  | 6.410094699   | 4.115424845   | -7.647022513 |
| C109  | -1.207889659  | -2.824371472  | -9.748814783 |
| C110  | -2.293623068  | -1.772464613  | -9.497777999 |
| C111  | -0.927871305  | -3.599853380  | -8.440490344 |
| C112  | -0.115882258  | -4.881465684  | -8.703823025 |
| C113  | 0.353457161   | -5.485361646  | -7.397418890 |
| C114  | -2.837938686  | 0.491786068   | -8.753710179 |
| C115  | -2.299939770  | 1.823481059   | -9.240094911 |
| C116  | -3.414303602  | 0.510735286   | -7.315819140 |
| C117  | -2.324965668  | 0.460838543   | -6.279237468 |
| C118  | -1.653496682  | 1.629742615   | -5.882097563 |
| C119  | -1.872154030  | -0.777420802  | -5.792980720 |
| C120  | -0.517983359  | 1.551689593   | -5.069895426 |
| C121  | -0.739194153  | -0.854354074  | -4.978829890 |
| C122  | -0.042321043  | 0.309006617   | -4.638263552 |
| C123  | 8.714065364   | -5.827763044  | -3.888575911 |
| C124  | 9.725052252   | -5.967871424  | -2.741170348 |
| C125  | 7.306045432   | -6.222465977  | -3.413483907 |
| C126  | 6.192549072   | -5.985664240  | -4.382079705 |
| C127  | 6.049523492   | -6.532408570  | -5.640830096 |
| C128  | 4.190501230   | -5.466328874  | -5.092001785 |
| C129  | 10.659782199  | -7.294452344  | -0.943387430 |
| C130  | 12.090839917  | -6.953507263  | -1.296162726 |
| C131  | 0.741606130   | -6.821006232  | -0.618742126 |
| C132  | 2.165602688   | -6.898162237  | -0.077332797 |
| C133  | 3.275561425   | -6.939829764  | -1.171772223 |
| C134  | 3.330266361   | -8.350833135  | -1.814071956 |
| C135  | 4.537775668   | -8.612712104  | -2.716693549 |
| C136  | 4.648704743   | -10.067196208 | -3.226330816 |
| C137  | 4.629034661   | -6.655152068  | -0.499356707 |
| C138  | 3.920563733   | -0.502634667  | -1.727062853 |
| Fe139 | 4.462840550   | -1.685106614  | -3.252695568 |
| Fe140 | 2.547120366   | 0.663340572   | -1.339736588 |
| Fe141 | 5.049481973   | 0.634474825   | -0.566125758 |
| Fe142 | 4.448162618   | 0.873057502   | -3.098127647 |
| Fe143 | 4.011106673   | 2.884463098   | -1.393776200 |

|  |       |              |              |               |
|--|-------|--------------|--------------|---------------|
|  | Fe144 | 4.765831862  | -1.934176276 | -0.674703538  |
|  | Fe145 | 2.395595230  | -2.121347746 | -1.677926245  |
|  | H146  | -6.132414106 | -7.567286797 | -1.227250568  |
|  | H147  | -6.143751199 | -6.500262889 | -2.462156102  |
|  | H148  | -9.692224121 | -4.983548938 | -0.558532646  |
|  | H149  | -8.511288614 | -6.171381953 | -2.270444537  |
|  | H150  | -8.546180061 | -7.384093115 | -0.996563830  |
|  | H151  | -8.069607174 | -2.952551611 | 0.534575998   |
|  | H152  | -9.045496696 | -5.979929944 | 2.084395181   |
|  | H153  | -9.775322191 | -3.246979916 | 0.931712296   |
|  | H154  | -8.604503657 | -6.785489226 | 4.215537922   |
|  | H155  | -6.330462590 | -6.128597774 | 2.240456551   |
|  | H156  | -8.577849975 | -5.114349848 | 4.819718516   |
|  | H157  | -3.375995741 | -1.921677744 | 2.619274394   |
|  | H158  | -5.309279764 | -3.940634285 | 2.031694057   |
|  | H159  | -4.009046386 | -6.382176944 | 2.327285424   |
|  | H160  | -5.952854648 | -0.675268318 | 6.357449519   |
|  | H161  | -6.466032787 | -2.719334132 | 4.384581261   |
|  | H162  | -4.076758897 | -6.592912004 | 4.094380249   |
|  | H163  | -5.074721316 | -1.680575937 | 2.168450582   |
|  | H164  | -5.341430321 | -4.236959084 | 6.468522902   |
|  | H165  | -7.091397054 | -2.041737795 | 6.517362175   |
|  | H166  | -1.001841037 | -3.653496081 | 3.199653627   |
|  | H167  | -1.097668346 | -2.471078569 | 1.877491753   |
|  | H168  | 0.447867340  | -2.748713056 | 2.700530832   |
|  | H169  | -2.038755824 | -1.609995256 | 4.095221059   |
|  | H170  | -4.742351452 | -5.450354100 | 8.348716020   |
|  | H171  | -2.751965925 | 1.638163808  | 5.034925971   |
|  | H172  | -2.899160149 | -0.979500798 | 8.761903590   |
|  | H173  | -3.259648716 | 2.389671044  | 9.301302552   |
|  | H174  | 0.164401766  | -0.171803624 | 2.614072108   |
|  | H175  | -0.532160327 | 0.591488884  | 4.054967102   |
|  | H176  | 8.463623987  | 1.748516626  | 5.971253487   |
|  | H177  | -3.807726480 | 2.926094169  | 5.640915749   |
|  | H178  | -4.025138610 | 3.402731108  | 8.054692556   |
|  | H179  | -2.039960787 | 3.106143634  | 5.759609793   |
|  | H180  | -2.271285968 | 3.513900682  | 8.337760262   |
|  | H181  | -3.748234163 | 1.034950722  | 7.268432864   |
|  | H182  | -0.738947599 | 1.604385783  | 7.313843202   |
|  | H183  | -2.329620154 | -0.472662115 | 6.040331876   |
|  | H184  | -1.570448770 | 0.158186416  | 2.697067960   |
|  | H185  | 1.566890459  | 4.302348548  | 0.791734832   |
|  | H186  | 0.459412637  | 4.369167474  | 2.194158892   |
|  | H187  | 2.192415570  | 5.228255476  | 3.132615848   |
|  | H188  | 2.353435539  | 4.386987740  | 5.645210328   |
|  | H189  | 4.357056643  | 4.148066119  | 2.740469470   |
|  | H190  | 6.235990851  | 2.540994426  | 2.545739687   |
|  | H191  | 5.552774813  | 1.260472709  | 6.610610027   |
|  | H192  | -1.810169292 | -3.207154383 | 5.739772468   |
|  | H193  | -0.721715306 | -6.142901102 | 6.024779689   |
|  | H194  | -0.372370900 | -5.617520904 | 7.684613388   |
|  | H195  | -2.870086615 | -5.059766416 | 6.153730696   |
|  | H196  | -4.414790322 | -3.939400202 | 9.238598053   |
|  | H197  | 3.633597516  | 2.823572382  | 6.780565472   |
|  | H198  | 0.814819592  | -2.033359669 | 5.027325645   |
|  | H199  | -2.651692511 | -0.199594856 | 11.416225448  |
|  | H200  | -2.716208435 | -1.892135184 | 10.859126667  |
|  | H201  | -0.027385346 | -1.514301867 | 10.490863028  |
|  | H202  | 10.470061044 | -7.218792328 | 5.238355435   |
|  | H203  | -0.963057235 | -5.666923819 | -4.792750359  |
|  | H204  | 1.643753864  | -5.904417497 | -2.069170684  |
|  | H205  | -0.755215543 | -5.619699053 | -9.209486773  |
|  | H206  | 0.743017502  | -4.664301511 | -9.354804210  |
|  | H207  | -1.875483905 | -3.873706540 | -7.951300867  |
|  | H208  | -1.579980881 | 1.744280966  | -10.088634784 |
|  | H209  | -1.679398527 | -3.523416491 | -10.455581557 |
|  | H210  | -2.898056609 | -2.011496181 | -2.967434938  |
|  | H211  | -3.608061799 | -4.878271593 | -2.153609412  |
|  | H212  | -0.886396126 | -0.403104459 | -8.813230207  |
|  | H213  | -3.686598198 | 0.282440582  | -9.436423352  |
|  | H214  | 0.545165573  | -1.707903552 | -9.780984661  |
|  | H215  | -0.804794400 | -5.652030847 | -3.038906302  |
|  | H216  | -0.393140803 | -2.938331138 | -7.740450511  |
|  | H217  | 0.539873051  | -2.989216254 | -10.814283999 |
|  | H218  | -6.119369565 | -3.271332615 | -4.179273109  |
|  | H219  | -3.296988512 | -2.382700773 | -1.273982991  |
|  | H220  | 2.124907293  | -4.704441293 | -7.732313018  |
|  | H221  | -2.027639706 | -4.242147263 | -1.731610152  |
|  | H222  | -4.329713105 | 2.318902613  | 2.567774826   |
|  | H223  | -3.218667547 | 0.384374440  | 0.837105440   |
|  | H224  | -8.672746041 | 0.433567379  | 2.469323874   |
|  | H225  | -7.358732574 | -0.205452343 | -0.137498845  |

|      |               |              |              |
|------|---------------|--------------|--------------|
| H226 | -7.293137587  | 3.847363179  | 1.480979107  |
| H227 | -9.121170810  | 8.318240995  | 3.654460597  |
| H228 | -7.684161959  | 4.806215725  | 4.504564140  |
| H229 | -9.448156211  | 5.105877882  | 2.369798796  |
| H230 | -6.739400598  | 6.561025079  | 2.160239289  |
| H231 | -11.039692744 | 9.350720545  | 0.022553429  |
| H232 | -3.530210555  | 4.102353023  | 1.011967217  |
| H233 | -4.944847019  | 3.870498223  | -0.025417229 |
| H234 | -10.428316212 | 10.104429790 | 2.383855460  |
| H235 | -8.672547797  | 5.424813609  | 0.817880871  |
| H236 | -6.377313660  | 1.858739804  | 0.484422689  |
| H237 | -7.510164892  | -0.878847815 | 2.258339452  |
| H238 | -9.741134986  | 1.887039259  | -1.683831263 |
| H239 | -1.793730675  | 1.712116647  | -2.940578673 |
| H240 | -10.073365791 | 0.148932081  | -1.807711947 |
| H241 | 9.698478985   | 3.119013820  | 4.454544841  |
| H242 | 8.146764899   | 3.248267048  | 3.961190964  |
| H243 | 1.665239809   | 6.077071960  | -0.755813608 |
| H244 | -0.801472407  | 5.419285284  | 0.561394567  |
| H245 | 1.518774907   | 8.030414776  | 1.174825029  |
| H246 | -3.256851262  | 3.628670120  | -1.926731355 |
| H247 | -4.673740044  | 4.330596836  | -3.286805498 |
| H248 | -6.012472964  | 3.648165221  | -4.954404631 |
| H249 | -4.539330409  | 5.505230002  | -2.221296017 |
| H250 | -4.823656109  | 1.509960087  | -4.816105511 |
| H251 | -6.612642396  | 1.514698382  | -4.916796755 |
| H252 | 0.024309034   | 11.701575789 | -1.006147726 |
| H253 | -1.181990626  | 12.994803720 | -0.924120210 |
| H254 | -0.567472710  | 10.402601587 | -2.706161843 |
| H255 | -2.223240872  | 9.869464415  | -3.001195753 |
| H256 | -2.894617384  | 9.580882690  | -5.912526347 |
| H257 | -1.778812959  | 5.256484845  | -5.766659984 |
| H258 | -7.265200581  | 8.656240986  | -1.110357936 |
| H259 | -3.563815798  | 8.327250697  | 2.196269157  |
| H260 | -4.293337579  | 7.950077479  | -3.113609348 |
| H261 | 1.565582374   | 5.661644754  | -3.281750046 |
| H262 | 2.685338659   | 7.439211283  | -2.301155537 |
| H263 | -0.931214132  | 5.106829883  | -3.203736664 |
| H264 | -8.030660705  | -0.148603801 | -2.848235725 |
| H265 | 4.056532226   | 10.330278851 | -2.773158142 |
| H266 | -5.501132481  | -0.761077006 | -4.082549185 |
| H267 | 1.255482259   | 6.746088286  | -4.636744766 |
| H268 | -3.528812459  | 6.912299285  | 0.186188308  |
| H269 | 3.467076160   | 10.486306723 | -1.106935320 |
| H270 | -2.060428654  | 8.201857388  | -6.535799100 |
| H271 | -4.546769578  | 9.194861373  | -4.290468688 |
| H272 | -4.477420609  | -3.274613969 | -4.495593200 |
| H273 | -5.485405585  | -3.314183190 | -1.977606671 |
| H274 | -7.234314841  | 10.171348204 | 0.851827455  |
| H275 | -4.960395861  | 1.466707553  | -2.333345757 |
| H276 | -0.053042899  | 8.267850958  | -3.154517627 |
| H277 | -0.878180212  | 6.776849719  | -5.745254456 |
| H278 | 0.022175438   | 4.552617163  | -4.571726888 |
| H279 | -3.069566099  | 6.108211662  | -3.787323089 |
| H280 | 0.160265610   | 8.662692493  | 3.671734094  |
| H281 | -0.629173016  | 9.710530039  | 0.724117770  |
| H282 | -0.375786207  | 12.545004545 | 1.270736669  |
| H283 | 1.729840594   | 9.269404634  | 3.092975079  |
| H284 | -2.901462985  | 10.446355564 | 2.040751943  |
| H285 | 6.076836733   | -2.317205555 | -8.544650572 |
| H286 | 5.931041977   | -3.848040154 | -7.661789581 |
| H287 | 8.718722867   | -4.758312944 | -4.146946610 |
| H288 | 6.729567436   | -4.286250491 | -9.867167746 |
| H289 | 5.176715677   | -4.804165636 | -9.841635188 |
| H290 | 5.485843976   | 4.873756298  | 0.283224528  |
| H291 | 5.449118838   | 7.417822777  | 1.949241029  |
| H292 | 5.175866991   | 8.385844788  | -2.191141255 |
| H293 | 3.991041414   | 5.638935738  | 0.912697932  |
| H294 | 6.659311007   | 8.117475761  | 1.099824064  |
| H295 | 6.373908497   | 3.366290388  | -5.661107365 |
| H296 | 6.113108979   | 6.942324286  | -0.872647185 |
| H297 | 4.547600868   | -7.381809901 | 5.257064957  |
| H298 | 6.684162710   | -8.007670144 | 3.145797766  |
| H299 | 4.678891212   | 1.913065007  | -6.077808610 |
| H300 | 4.704039630   | -0.454646171 | 4.075873306  |
| H301 | 1.904858629   | 2.179063982  | -8.333654898 |
| H302 | -0.387298407  | -1.824706968 | -4.622056895 |
| H303 | 1.533840859   | 2.581650846  | -6.656620079 |
| H304 | 3.452354797   | -4.878729169 | 4.739538150  |
| H305 | 3.160088426   | 0.540927217  | -6.150243025 |
| H306 | 3.424238595   | -5.379641147 | 3.045918791  |
| H307 | 4.295411513   | -7.576817359 | 3.505863834  |

|       |              |               |              |
|-------|--------------|---------------|--------------|
| H308  | 5.949466668  | -5.648736469  | 3.140437245  |
| H309  | 5.891754321  | -5.332048735  | 4.880630989  |
| H310  | -4.082772256 | -0.356408788  | -7.214717971 |
| H311  | 5.263755415  | -9.793028051  | 5.081249142  |
| H312  | 4.609229518  | -11.908883911 | 3.010221532  |
| H313  | 0.8662211967 | 0.263664978   | -4.038296970 |
| H314  | 5.543294424  | -12.202316194 | 5.763439075  |
| H315  | 4.058986036  | -12.484381750 | 5.131848514  |
| H316  | 5.075630585  | -3.540040661  | 2.611113633  |
| H317  | 0.018286762  | 2.455416900   | -4.773698250 |
| H318  | -2.401198386 | -1.693893660  | -6.063228540 |
| H319  | 8.002516521  | -9.728640787  | -1.131354531 |
| H320  | 7.303405935  | -7.297297509  | -3.161890882 |
| H321  | 6.708710206  | -8.089310467  | 0.352376367  |
| H322  | 7.338618177  | -10.260859754 | -2.431829700 |
| H323  | 6.311313240  | 3.365397557   | -8.467972286 |
| H324  | 6.355818654  | -4.940296437  | 0.455330866  |
| H325  | 2.247940149  | -7.762175549  | 0.594039868  |
| H326  | 4.513342466  | -1.420608226  | -7.156211874 |
| H327  | 3.339706514  | -9.074669072  | -0.984707232 |
| H328  | 4.345208404  | -6.480938266  | -6.935176348 |
| H329  | 3.173791165  | -5.104660215  | -5.163339278 |
| H330  | 6.142549529  | -12.618695228 | 3.532060052  |
| H331  | 5.484247865  | -1.338849280  | 2.836470323  |
| H332  | 8.200930084  | -5.781997555  | 1.720615829  |
| H333  | 7.185732416  | -3.682140809  | 0.821350946  |
| H334  | 8.513977860  | -6.968361680  | 3.698501034  |
| H335  | 2.786891508  | -3.104643035  | 5.423903833  |
| H336  | 4.480154941  | -7.959127463  | -3.600638564 |
| H337  | 5.468288530  | -8.359554512  | -2.190171576 |
| H338  | 2.397601931  | -8.516110738  | -2.375186900 |
| H339  | 2.357717646  | -1.705194424  | -6.027227508 |
| H340  | -2.006739926 | 2.596971042   | -6.247504777 |
| H341  | -4.019560473 | 1.424873034   | -7.224300277 |
| H342  | 2.302072995  | -5.991242920  | 0.535663088  |
| H343  | 8.421004434  | -7.292113273  | 1.411756755  |
| H344  | 7.363545569  | -9.220871595  | 1.177777311  |
| H345  | 3.426106664  | -1.522932772  | 5.723685706  |
| H346  | 6.723298396  | -7.137718670  | -6.233839964 |
| H347  | 7.082191391  | -5.693612787  | -2.479051562 |
| H348  | 1.721695147  | -2.378828331  | -7.554081660 |
| H349  | 5.262873631  | 4.721175633   | -5.941514649 |
| H350  | 7.049384913  | -0.042500658  | 5.086485709  |
| H351  | 7.326467074  | 0.499499689   | 3.414857377  |
| H352  | 10.040627235 | -6.243257996  | -5.397205632 |
| H353  | 9.235048764  | -7.566727450  | -4.872142539 |
| H354  | 10.645757647 | -8.351220756  | -0.632451696 |
| H355  | 9.126386146  | -7.930017206  | -2.280440660 |
| H356  | 12.364135056 | -7.120028015  | -2.365890008 |
| H357  | 10.337206457 | -6.686639749  | -0.083225892 |
| H358  | 10.063301384 | 0.280090482   | 3.781405407  |
| H359  | -3.800919789 | 12.792921660  | 4.163504684  |
| H360  | 9.313208379  | -7.162739626  | 6.591372924  |
| H361  | 8.792489307  | -4.661392148  | 5.512191350  |
| H362  | -5.102007586 | 12.131463326  | 1.499581650  |
| H363  | -4.822900727 | 9.956660912   | 3.667901858  |
| H364  | -6.344334337 | 10.671030653  | 3.101428051  |
| H365  | 1.262927112  | -3.078675556  | -1.407561715 |
| H366  | 4.248723733  | -1.545936529  | 0.676626959  |
| H367  | -6.245491692 | 6.876414347   | -2.122486011 |
| H368  | 0.353063476  | -0.911724883  | -0.130841587 |
| H369  | 1.908448174  | -1.230209636  | 1.439617276  |
| H370  | 1.411346304  | -1.701489712  | 1.137144872  |
| H371  | -1.766465471 | -0.143465218  | -1.237132378 |
| Mo372 | 4.185993052  | -4.141958474  | -2.140057232 |
| N373  | -6.711907636 | -7.207733681  | -1.990075412 |
| N374  | -8.838936510 | -4.839402941  | -0.024270703 |
| N375  | -8.592003457 | -5.333751878  | 2.726131584  |
| N376  | -5.898875184 | -6.092350150  | 3.165686032  |
| N377  | -4.611967827 | -3.626515404  | 2.703335347  |
| N378  | -5.768210660 | -2.195640659  | 4.920144874  |
| N379  | -4.880067675 | -3.711898873  | 7.216687507  |
| N380  | -2.254995032 | -5.072185697  | 6.971695213  |
| N381  | -0.799844090 | -3.088333694  | 5.758930188  |
| N382  | -1.495840017 | -0.188111747  | 6.561679802  |
| N383  | -2.188719337 | -0.556873209  | 9.364694565  |
| N384  | 4.853832706  | -11.844271276 | 5.098798190  |
| N385  | 5.861250270  | -9.509069214  | 4.297309375  |
| N386  | 4.413800890  | -3.570520296  | 3.392418896  |
| N387  | 3.453281230  | -2.369478486  | 5.163000651  |
| N388  | 5.018014876  | -1.367466906  | 3.758334281  |
| N389  | 8.420066152  | -7.145432549  | 4.723081915  |

|      |               |               |               |
|------|---------------|---------------|---------------|
| N390 | -5.250244460  | -2.750658863  | -4.044682912  |
| N391 | -1.316308108  | -5.361182537  | -3.879572153  |
| N392 | -5.657117598  | -0.324252940  | -3.157770624  |
| N393 | -8.114865321  | 0.675847719   | -2.257302738  |
| N394 | -8.063022142  | 0.162930471   | 0.510379141   |
| N395 | -6.037277247  | 1.854990970   | 1.450498396   |
| N396 | -2.995810042  | 2.729391158   | -1.436695751  |
| N397 | -2.335746965  | 0.702027097   | -1.110166163  |
| N398 | -6.785618487  | 4.446939292   | 2.126582816   |
| N399 | -10.017918238 | 7.524542181   | 0.546591015   |
| N400 | -10.187121409 | 9.197084239   | 1.993790338   |
| N401 | 8.931275013   | 2.593642960   | 4.027965268   |
| N402 | 6.126461584   | 7.248818177   | 1.198063289   |
| N403 | 4.440922971   | 8.683350945   | -1.555208353  |
| N404 | 1.912611983   | 8.086679941   | -2.491526591  |
| N405 | -2.541719954  | 6.694366323   | -4.457401245  |
| N406 | -2.541296543  | 8.641523831   | -5.758859768  |
| N407 | -3.936536661  | 8.471868687   | -3.918218469  |
| N408 | 0.715545230   | 6.400657229   | -0.499968806  |
| N409 | 0.649768833   | 8.138490450   | 1.706177153   |
| N410 | -0.661790469  | 10.518005373  | 1.346060344   |
| N411 | -1.578287538  | 10.527161784  | -2.567249993  |
| N412 | -3.206705831  | 11.416138626  | 2.059956826   |
| N413 | 5.760620561   | -3.963093440  | -9.822774736  |
| N414 | 3.754985297   | -1.969559159  | -7.571457871  |
| N415 | 2.578040037   | 0.774560741   | -6.970394949  |
| N416 | 4.598501305   | 2.805266507   | -6.574175276  |
| N417 | -0.043862411  | -2.243217207  | -10.429759834 |
| N418 | -1.876716556  | -0.563230551  | -9.019768332  |
| N419 | 9.119961177   | -6.573011573  | -5.093991398  |
| N420 | 5.018444041   | -5.306890750  | -4.057668920  |
| N421 | 4.786250217   | -6.190582024  | -6.066479294  |
| N422 | 9.767030276   | -7.156982929  | -2.080599050  |
| N423 | -0.386133375  | 2.341677478   | 0.789395503   |
| N424 | 2.162594477   | 1.264924193   | 3.565691478   |
| N425 | 0.032216935   | 2.542372596   | -0.220775790  |
| N426 | 2.653229499   | 0.401648381   | 3.069174584   |
| O427 | -6.618498386  | -5.304370044  | 0.174888241   |
| O428 | -7.822467252  | -3.208415177  | 3.037296837   |
| O429 | -6.195023127  | -5.684290508  | 5.393086177   |
| O430 | -3.101415229  | -4.246823601  | 4.302127830   |
| O431 | -3.903540386  | -0.900463898  | 4.853775390   |
| O432 | -4.697448577  | -1.690132200  | 8.277826537   |
| O433 | -2.028052871  | -4.625353348  | 9.207769156   |
| O434 | 1.198396201   | -4.158830754  | 6.158966344   |
| O435 | 0.774003949   | -0.331691439  | 6.771701425   |
| O436 | -0.709618952  | 1.123306614   | 9.740943037   |
| O437 | -0.450935921  | -1.120003467  | 12.449638757  |
| O438 | 6.835055458   | -10.399610577 | 2.399261815   |
| O439 | 7.131622154   | -8.026103536  | 6.412161630   |
| O440 | 10.757696287  | -4.751705357  | 6.049952267   |
| O441 | -5.570464500  | -0.894500065  | -0.937049078  |
| O442 | -2.905762305  | -4.080154969  | -4.884136963  |
| O443 | -7.022476137  | 2.469667164   | -1.364289973  |
| O444 | -5.769245495  | 3.243664099   | -4.102469796  |
| O445 | -10.062673307 | 1.259999028   | 0.761407832   |
| O446 | -6.328374724  | 1.110686165   | 3.589485307   |
| O447 | -4.892132014  | 4.691754097   | 3.380516544   |
| O448 | -7.439955077  | 6.826367203   | 4.672117612   |
| O449 | 9.952060965   | -0.326442650  | 5.727486098   |
| O450 | 2.833765661   | 4.478632083   | 4.801828012   |
| O451 | 3.495539475   | 8.424874860   | 0.502795910   |
| O452 | 1.333079977   | 10.309981747  | -2.601125998  |
| O453 | -1.283646483  | 7.240787916   | -1.226442662  |
| O454 | -1.178611555  | 6.991921004   | 2.494065732   |
| O455 | 2.082865371   | 5.675293030   | 2.267813281   |
| O456 | 0.207080088   | 11.393901808  | 3.280487209   |
| O457 | -2.798217735  | 13.485383333  | 1.193927988   |
| O458 | -3.220139760  | 11.059534756  | -1.069850137  |
| O459 | -5.696962545  | 13.398539900  | 3.707348633   |
| O460 | -5.352179262  | 6.885870922   | -1.727185971  |
| O461 | 3.227058251   | -3.907638395  | -8.685870735  |
| O462 | 1.138533828   | -0.105255109  | -8.523138747  |
| O463 | 3.355769065   | 4.246572932   | -7.817966920  |
| O464 | 7.111157049   | 5.107307741   | -7.764883532  |
| O465 | -3.494231528  | -2.020490276  | -9.696267450  |
| O466 | -0.379394262  | -6.130994145  | -6.655107091  |
| O467 | 1.628269055   | -5.238919623  | -7.038449127  |
| O468 | -2.641188289  | 2.911660923   | -8.798461377  |
| O469 | 10.509506176  | -5.046226276  | -2.442585772  |
| O470 | 12.923258152  | -6.595864128  | -0.474400393  |
| O471 | 0.610758458   | -6.142033685  | -1.760710487  |



|                                                                                     |                                          |              |               |              |
|-------------------------------------------------------------------------------------|------------------------------------------|--------------|---------------|--------------|
|                                                                                     | O472                                     | -0.222202943 | -7.299759739  | -0.020793475 |
|                                                                                     | O473                                     | 5.812464764  | -10.602352948 | -3.213927149 |
|                                                                                     | O474                                     | 3.594915789  | -10.618427378 | -3.652681296 |
|                                                                                     | O475                                     | 5.272282070  | -5.591887978  | -0.905590427 |
|                                                                                     | O476                                     | 5.068893017  | -7.418931419  | 0.381164926  |
|                                                                                     | O477                                     | 2.993440001  | -5.925648642  | -2.144611242 |
|                                                                                     | O478                                     | 8.767656277  | -6.548725050  | 1.979496930  |
|                                                                                     | O479                                     | 6.851949137  | -4.516576876  | 1.203491481  |
|                                                                                     | O480                                     | -4.013281705 | 4.886959717   | -2.789545308 |
|                                                                                     | O481                                     | 8.231517079  | -10.161109712 | -1.983853067 |
|                                                                                     | O482                                     | 7.580476981  | -8.546731902  | 0.484189012  |
|                                                                                     | S483                                     | 3.780463460  | 5.145370902   | -1.460560110 |
|                                                                                     | S484                                     | 2.564213607  | 2.124474854   | -2.959809627 |
|                                                                                     | S485                                     | 2.714789635  | -3.014812940  | -3.660933662 |
|                                                                                     | S486                                     | 3.337274431  | 1.761985891   | 0.397121881  |
|                                                                                     | S487                                     | 0.691144508  | -0.585238271  | -1.413328189 |
|                                                                                     | S488                                     | 5.031538021  | -0.280392795  | -4.889420240 |
|                                                                                     | S489                                     | 3.253666548  | -3.413525045  | -0.107512644 |
|                                                                                     | S490                                     | 6.039193499  | 2.049615043   | -1.984639425 |
|                                                                                     | S491                                     | 6.134919374  | -2.804559334  | -2.266879656 |
|                                                                                     | S492                                     | 6.334997751  | -0.781431090  | 0.543437194  |
|                                                                                     | end                                      |              |               |              |
| <b>N2 / H2 exchange</b><br><b>2N2 TS</b><br><b>35, S=3/2</b>                        |                                          |              |               |              |
| <b>Fe(139) -2.278</b>                                                               |                                          |              |               |              |
| <b>Fe(140) 0.750</b>                                                                |                                          |              |               |              |
| <b>Fe(141) -2.450</b>                                                               |                                          |              |               |              |
| <b>Fe(142) 2.571</b>                                                                |                                          |              |               |              |
| <b>Fe(143) 2.123</b>                                                                |                                          |              |               |              |
| <b>Fe(144) 1.222</b>                                                                |                                          |              |               |              |
| <b>Fe(145) 1.208</b>                                                                |                                          |              |               |              |
| 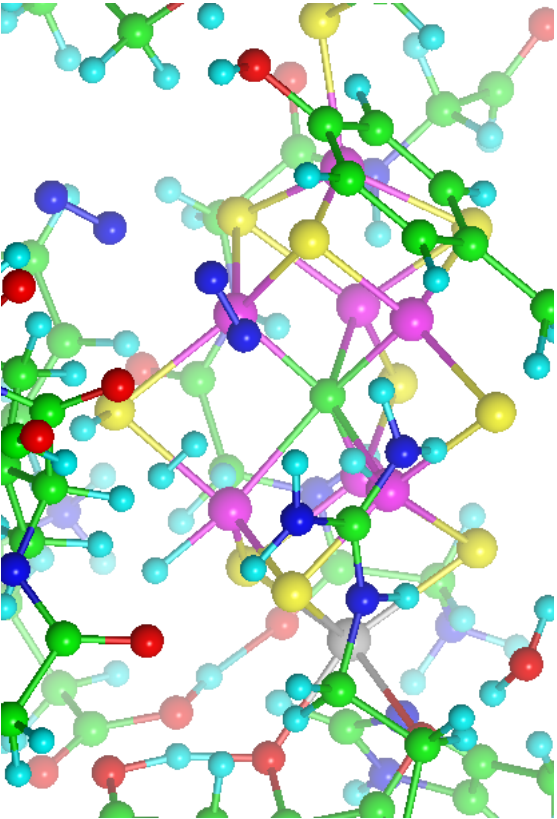 |                                          |              |               |              |
|                                                                                     | <b>bm52h2disn2dis2n2x3dtd 1 53373.49</b> |              |               |              |
|                                                                                     | C1                                       | -7.731302269 | -5.521351012  | -0.381872383 |
|                                                                                     | C2                                       | -7.948168583 | -6.593222062  | -1.454346910 |
|                                                                                     | C3                                       | -8.772912291 | -3.695698404  | 0.888340404  |
|                                                                                     | C4                                       | -8.340631975 | -4.047637787  | 2.307960571  |
|                                                                                     | C5                                       | -8.160902344 | -5.757558342  | 4.047723721  |
|                                                                                     | C6                                       | -6.643523969 | -5.828023585  | 4.244143499  |
|                                                                                     | C7                                       | -4.431892564 | -5.989536115  | 3.230533320  |
|                                                                                     | C8                                       | -3.959977881 | -4.545709514  | 3.443932542  |
|                                                                                     | C9                                       | -4.375849797 | -2.197638403  | 2.824845261  |
|                                                                                     | C10                                      | -4.644193940 | -1.684472915  | 4.247421959  |
|                                                                                     | C11                                      | -6.022118620 | -1.731919505  | 6.228225382  |
|                                                                                     | C12                                      | -5.106318024 | -2.346013248  | 7.298525924  |
|                                                                                     | C13                                      | -4.235920462 | -4.430049858  | 8.265864677  |
|                                                                                     | C14                                      | -2.724168296 | -4.691727342  | 8.168748246  |
|                                                                                     | C15                                      | -0.844919344 | -5.343856685  | 6.714926268  |
|                                                                                     | C16                                      | -0.049662952 | -4.139394389  | 6.198726366  |
|                                                                                     | C17                                      | -0.252965161 | -1.865699219  | 5.231699394  |
|                                                                                     | C18                                      | -0.290055327 | -0.730535355  | 6.279151337  |
|                                                                                     | C19                                      | -0.950645468 | -1.574190709  | 3.885087217  |
|                                                                                     | C20                                      | -0.697988908 | -0.167518432  | 3.317107541  |
|                                                                                     | C21                                      | -0.595314273 | -2.673755207  | 2.876765657  |
|                                                                                     | C22                                      | -1.609447400 | 0.941591296   | 7.502832066  |
|                                                                                     | C23                                      | -1.466076934 | 0.519430975   | 8.977806832  |
|                                                                                     | C24                                      | -2.906581875 | 1.743961638   | 7.230459482  |
|                                                                                     | C25                                      | -3.131329535 | 2.826130528   | 8.292351756  |
|                                                                                     | C26                                      | -2.865386310 | 2.373284379   | 5.830983847  |
|                                                                                     | C27                                      | -2.170696962 | -0.926135102  | 10.791205773 |
|                                                                                     | C28                                      | -0.761139674 | -1.178767263  | 11.287897251 |
|                                                                                     | C29                                      | 5.432665077  | -11.802069848 | 3.775072735  |
|                                                                                     | C30                                      | 6.122740685  | -10.488233907 | 3.431079401  |
|                                                                                     | C31                                      | 6.251091273  | -8.104876561  | 4.141433595  |
|                                                                                     | C32                                      | 7.309250408  | -7.751308978  | 5.203291073  |
|                                                                                     | C33                                      | 5.009364582  | -7.206702842  | 4.255141083  |
|                                                                                     | C34                                      | 5.327131851  | -5.732954799  | 4.030454833  |
|                                                                                     | C35                                      | 4.063466073  | -4.896660858  | 3.837485834  |
|                                                                                     | C36                                      | 4.282818191  | -2.418628783  | 4.131272674  |
|                                                                                     | C37                                      | 9.527201192  | -6.782690435  | 5.579225980  |
|                                                                                     | C38                                      | 9.720578953  | -5.288653521  | 5.717084788  |
|                                                                                     | C39                                      | -4.969228394 | -2.590573129  | -2.607518841 |
|                                                                                     | C40                                      | -5.434441892 | -1.201637287  | -2.131429207 |
|                                                                                     | C41                                      | -3.456821581 | -2.718933349  | -2.312790429 |
|                                                                                     | C42                                      | -2.863842745 | -4.136465921  | -2.442835105 |
|                                                                                     | C43                                      | -2.364579284 | -4.519205366  | -3.836303480 |
|                                                                                     | C44                                      | -5.801970542 | 1.100440520   | -2.937253253 |
|                                                                                     | C45                                      | -7.040898586 | 1.475403484   | -2.114412156 |
|                                                                                     | C46                                      | -5.760910596 | 1.810590814   | -4.296979116 |
|                                                                                     | C47                                      | -9.329249829 | 0.870976076   | -1.477480788 |
|                                                                                     | C48                                      | -9.175235354 | 0.784583511   | 0.044858394  |
|                                                                                     | C49                                      | -7.757129593 | 0.151164777   | 1.941450368  |
|                                                                                     | C50                                      | -6.647366113 | 1.094057577   | 2.407353128  |
|                                                                                     | C51                                      | -5.002644986 | 2.817646065   | 1.855846919  |
|                                                                                     | C52                                      | -5.571290116 | 4.068749648   | 2.566395721  |
|                                                                                     | C53                                      | -4.225431199 | 3.354411150   | 0.645015586  |
|                                                                                     | C54                                      | -3.466000342 | 2.363617039   | -0.171072233 |
|                                                                                     | C55                                      | -3.043877566 | 1.074851118   | 0.037780429  |
|                                                                                     | C56                                      | -2.300396305 | 1.711136803   | -1.964191857 |
|                                                                                     | C57                                      | -7.392685807 | 5.726814108   | 2.505451389  |
|                                                                                     | C58                                      | -7.526585035 | 5.788664723   | 4.025796988  |

|       |               |               |              |
|-------|---------------|---------------|--------------|
| C59   | -8.784506192  | 5.803952080   | 1.830338012  |
| C60   | -9.407228208  | 7.164901741   | 1.713660581  |
| C61   | -9.498414410  | 8.200231283   | 2.623458440  |
| C62   | -10.514242837 | 8.743835625   | 0.730611389  |
| C63   | 8.545558111   | 1.465633225   | 4.926782483  |
| C64   | 9.604786267   | 0.381162943   | 4.837995286  |
| C65   | 7.209020441   | 0.826409526   | 4.482233990  |
| C66   | 6.039544128   | 1.774910984   | 4.589837611  |
| C67   | 5.279664000   | 1.871903294   | 5.770389610  |
| C68   | 5.685698371   | 2.603313942   | 3.510184491  |
| C69   | 4.198502742   | 2.754672048   | 5.870283997  |
| C70   | 4.625707125   | 3.503854163   | 3.603016796  |
| C71   | 3.872930775   | 3.569385912   | 4.779255150  |
| C72   | 5.384679008   | 6.980086198   | -0.029487274 |
| C73   | 4.356711838   | 8.085082538   | -0.318124206 |
| C74   | 4.691667238   | 5.619345173   | 0.080259984  |
| C75   | 3.591334500   | 9.780894672   | -1.941119760 |
| C76   | 2.170627055   | 9.403493259   | -2.366634076 |
| C77   | 0.601648886   | 7.501913266   | -2.729749831 |
| C78   | -0.084721437  | 7.041246044   | -1.418195583 |
| C79   | 0.801946524   | 6.328733925   | -3.718897941 |
| C80   | -0.401456280  | 5.456072030   | -4.093713819 |
| C81   | -1.402451435  | 6.045376727   | -5.100713256 |
| C82   | -3.022299746  | 7.909476793   | -4.732433490 |
| C83   | 0.109762225   | 5.947207051   | 0.764216317  |
| C84   | -0.228309698  | 7.094895309   | 1.726947310  |
| C85   | 1.025699565   | 4.958238678   | 1.520354276  |
| C86   | 0.686154087   | 9.098315438   | 2.791581201  |
| C87   | 0.064665125   | 10.452991366  | 2.489583317  |
| C88   | -1.093550349  | 11.821211792  | 0.838937222  |
| C89   | -2.465320675  | 12.316245364  | 1.356393495  |
| C90   | -1.010447751  | 11.941500387  | -0.684709019 |
| C91   | -2.043063622  | 11.110148542  | -1.435716993 |
| C92   | -4.607366786  | 11.714092419  | 2.381381335  |
| C93   | -4.709044353  | 12.734613011  | 3.506271790  |
| C94   | -5.330790557  | 10.400154128  | 2.791067595  |
| C95   | -5.383742344  | 9.403425382   | 1.654930479  |
| C96   | -6.429876240  | 9.455396759   | 0.719582073  |
| C97   | -4.371859794  | 8.449310420   | 1.461985991  |
| C98   | -6.451538890  | 8.608667677   | -0.389956423 |
| C99   | -4.363650092  | 7.609540387   | 0.343681637  |
| C100  | -5.406011454  | 7.702720789   | -0.573317617 |
| C101  | 5.548628402   | -3.274697082  | -8.520549397 |
| C102  | 4.064470545   | -3.067444814  | -8.274233140 |
| C103  | 2.390216128   | -1.642406797  | -7.118662229 |
| C104  | 1.955964786   | -0.253226716  | -7.599049287 |
| C105  | 2.303572683   | 2.161383235   | -7.311773756 |
| C106  | 3.470658509   | 3.144176963   | -7.248190577 |
| C107  | 5.635933225   | 3.792956288   | -6.349101209 |
| C108  | 6.430149075   | 4.086304430   | -7.605962796 |
| C109  | -1.208475515  | -2.822280955  | -9.736799202 |
| C110  | -2.294904025  | -1.771097691  | -9.486372293 |
| C111  | -0.926033374  | -3.597468550  | -8.428638580 |
| C112  | -0.114096427  | -4.878463221  | -8.695424275 |
| C113  | 0.359451367   | -5.485133097  | -7.391970444 |
| C114  | -2.844130679  | 0.490293263   | -8.740873439 |
| C115  | -2.301230876  | 1.823121759   | -9.217861129 |
| C116  | -3.436393467  | 0.506230621   | -7.308973820 |
| C117  | -2.349016093  | 0.462829217   | -6.270838237 |
| C118  | -1.682222529  | 1.635411986   | -5.876938461 |
| C119  | -1.880218377  | -0.774354599  | -5.796031962 |
| C120  | -0.530716651  | 1.562359189   | -5.087269986 |
| C121  | -0.731061404  | -0.846160324  | -5.005134319 |
| C122  | -0.034698213  | 0.321019462   | -4.676034583 |
| C123  | 8.708606326   | -5.814726176  | -3.895838114 |
| C124  | 9.720035124   | -5.961255356  | -2.750435341 |
| C125  | 7.304842146   | -6.228800529  | -3.429239979 |
| C126  | 6.189865552   | -5.982143179  | -4.393084311 |
| C127  | 6.042670514   | -6.512796911  | -5.658304097 |
| C128  | 4.183803455   | -5.457437395  | -5.085472035 |
| C129  | 10.648915561  | -7.293206123  | -0.955636390 |
| C130  | 12.081255137  | -6.971322975  | -1.321734030 |
| C131  | 0.752629131   | -6.837966809  | -0.621990332 |
| C132  | 2.173639622   | -6.919384452  | -0.073632241 |
| C133  | 3.286912947   | -6.954584970  | -1.164648680 |
| C134  | 3.327633556   | -8.358302765  | -1.825084693 |
| C135  | 4.530803769   | -8.618763984  | -2.733735998 |
| C136  | 4.640802801   | -10.072306425 | -3.243982256 |
| C137  | 4.644681529   | -6.692035276  | -0.491367847 |
| C138  | 3.903881505   | -0.503180942  | -1.704017563 |
| Fe139 | 4.426175010   | -1.692881690  | -3.224588282 |
| Fe140 | 2.523328851   | 0.715847586   | -1.213078320 |

|  |       |              |              |               |
|--|-------|--------------|--------------|---------------|
|  | Fe141 | 5.162555427  | 0.640183223  | -0.653027147  |
|  | Fe142 | 4.359174507  | 0.851091325  | -3.118766857  |
|  | Fe143 | 4.121212818  | 2.902371721  | -1.460063823  |
|  | Fe144 | 4.805507496  | -1.909284735 | -0.671149239  |
|  | Fe145 | 2.440014490  | -2.197981735 | -1.581231581  |
|  | H146  | -6.169795266 | -7.571644845 | -1.250786078  |
|  | H147  | -6.184165586 | -6.497981280 | -2.480182468  |
|  | H148  | -9.705941825 | -4.960514253 | -0.554653556  |
|  | H149  | -8.549115315 | -6.158072906 | -2.269277842  |
|  | H150  | -8.580019255 | -7.374890758 | -0.998104730  |
|  | H151  | -8.057527937 | -2.944440368 | 0.522645350   |
|  | H152  | -9.040099795 | -5.958372894 | 2.095305034   |
|  | H153  | -9.762468956 | -3.221129511 | 0.936229395   |
|  | H154  | -8.588103330 | -6.752861269 | 4.228265733   |
|  | H155  | -6.322706174 | -6.121111890 | 2.227120529   |
|  | H156  | -8.540519886 | -5.078129957 | 4.822143908   |
|  | H157  | -3.341255358 | -1.931203146 | 2.575416550   |
|  | H158  | -5.282384133 | -3.942489061 | 1.993979956   |
|  | H159  | -4.000139497 | -6.383544194 | 2.300155311   |
|  | H160  | -5.908766414 | -0.642105394 | 6.296066688   |
|  | H161  | -6.432110676 | -2.711404034 | 4.347401453   |
|  | H162  | -4.058421982 | -6.591034318 | 4.068003085   |
|  | H163  | -5.035190700 | -1.684634294 | 2.111068475   |
|  | H164  | -5.315264709 | -4.204338094 | 6.435166391   |
|  | H165  | -7.061456736 | -1.995446593 | 6.467705625   |
|  | H166  | -0.945883178 | -3.656867240 | 3.214668593   |
|  | H167  | -1.055379136 | -2.473527758 | 1.895416180   |
|  | H168  | 0.491165554  | -2.726602110 | 2.723544914   |
|  | H169  | -2.023313374 | -1.635231761 | 4.100026428   |
|  | H170  | -4.740011732 | -5.406041920 | 8.332083322   |
|  | H171  | -2.742495141 | 1.621335881  | 5.040461771   |
|  | H172  | -2.905637842 | -0.973087643 | 8.787356481   |
|  | H173  | -3.263661087 | 2.404929196  | 9.299436728   |
|  | H174  | 0.094275667  | -0.172764662 | 2.560603216   |
|  | H175  | -0.422208437 | 0.564452323  | 4.087842182   |
|  | H176  | 8.445811793  | 1.743383798  | 5.994409935   |
|  | H177  | -3.801822804 | 2.913221101  | 5.630428338   |
|  | H178  | -4.033263487 | 3.404928755  | 8.044865081   |
|  | H179  | -2.034633530 | 3.094638501  | 5.758799179   |
|  | H180  | -2.279597133 | 3.523733766  | 8.325204607   |
|  | H181  | -3.753630154 | 1.036019489  | 7.273236522   |
|  | H182  | -0.743711958 | 1.597541469  | 7.326128239   |
|  | H183  | -2.334034414 | -0.474276610 | 6.053894897   |
|  | H184  | -1.615673462 | 0.212080239  | 2.842071692   |
|  | H185  | 1.490334748  | 4.278539683  | 0.789761339   |
|  | H186  | 0.380134660  | 4.373081433  | 2.191420497   |
|  | H187  | 2.154289261  | 5.182265927  | 3.120714534   |
|  | H188  | 2.314054154  | 4.344982924  | 5.635132662   |
|  | H189  | 4.346375597  | 4.122626809  | 2.749799090   |
|  | H190  | 6.231924112  | 2.522282422  | 2.568086458   |
|  | H191  | 5.528349407  | 1.241078957  | 6.628605839   |
|  | H192  | -1.812161019 | -3.226372767 | 5.736159741   |
|  | H193  | -0.731690622 | -6.157087381 | 5.983088167   |
|  | H194  | -0.377082701 | -5.667837612 | 7.653342478   |
|  | H195  | -2.874689270 | -5.084106782 | 6.136033327   |
|  | H196  | -4.393224091 | -3.890301697 | 9.206958445   |
|  | H197  | 3.599748100  | 2.793153095  | 6.784142064   |
|  | H198  | 0.815947594  | -2.042316626 | 5.067887723   |
|  | H199  | -2.650709499 | -0.179434841 | 11.445880141  |
|  | H200  | -2.721463686 | -1.874864111 | 10.891943965  |
|  | H201  | -0.036070065 | -1.502339638 | 10.504904625  |
|  | H202  | 10.470229098 | -7.240864001 | 5.242168840   |
|  | H203  | -0.963727447 | -5.667680962 | -4.786297799  |
|  | H204  | 1.659851805  | -5.897357395 | -2.054182667  |
|  | H205  | -0.754444834 | -5.616043849 | -9.200896071  |
|  | H206  | 0.742926327  | -4.659625046 | -9.348314110  |
|  | H207  | -1.872476560 | -3.872580382 | -7.937747559  |
|  | H208  | -1.571021973 | 1.745471050  | -10.057454852 |
|  | H209  | -1.680009918 | -3.522896612 | -10.441824536 |
|  | H210  | -2.912362649 | -2.024812614 | -2.974455216  |
|  | H211  | -3.616910000 | -4.888046332 | -2.149339233  |
|  | H212  | -0.890715652 | -0.404970928 | -8.789545892  |
|  | H213  | -3.685991930 | 0.284034692  | -9.432935493  |
|  | H214  | 0.541619198  | -1.700029031 | -9.773091348  |
|  | H215  | -0.802849901 | -5.649420075 | -3.033339409  |
|  | H216  | -0.390530700 | -2.936558350 | -7.728649809  |
|  | H217  | 0.539161139  | -2.985631991 | -10.801840455 |
|  | H218  | -6.135590308 | -3.282407499 | -4.164814660  |
|  | H219  | -3.301003350 | -2.385137030 | -1.275809902  |
|  | H220  | 2.130221014  | -4.706026759 | -7.733877609  |
|  | H221  | -2.038124233 | -4.249879432 | -1.724590505  |
|  | H222  | -4.331779611 | 2.338078254  | 2.582675546   |

|      |               |              |              |
|------|---------------|--------------|--------------|
| H223 | -3.196455699  | 0.401363796  | 0.871171864  |
| H224 | -8.669113614  | 0.445259987  | 2.478947814  |
| H225 | -7.355433801  | -0.204628344 | -0.125644520 |
| H226 | -7.297336113  | 3.850923309  | 1.479357842  |
| H227 | -9.117442421  | 8.324049213  | 3.631016348  |
| H228 | -7.722014216  | 4.796674595  | 4.500470111  |
| H229 | -9.466259496  | 5.098473706  | 2.337419693  |
| H230 | -6.760924123  | 6.565951474  | 2.173588151  |
| H231 | -11.074776548 | 9.340089928  | 0.015050872  |
| H232 | -3.520277553  | 4.111397805  | 1.026816532  |
| H233 | -4.930373107  | 3.880272344  | -0.018568668 |
| H234 | -10.439075755 | 10.104364116 | 2.366036533  |
| H235 | -8.667522806  | 5.431911523  | 0.800362116  |
| H236 | -6.365607832  | 1.862352546  | 0.490073444  |
| H237 | -7.504868797  | -0.865624776 | 2.277380608  |
| H238 | -9.753420304  | 1.863642408  | -1.684035687 |
| H239 | -1.801237384  | 1.696456306  | -2.931147311 |
| H240 | -10.066194526 | 0.121156434  | -1.793188122 |
| H241 | 9.685705458   | 3.104588244  | 4.475496372  |
| H242 | 8.137008527   | 3.227930445  | 3.971295487  |
| H243 | 1.647124787   | 6.085799351  | -0.743802811 |
| H244 | -0.843785210  | 5.443075630  | 0.550248230  |
| H245 | 1.507720368   | 8.029767396  | 1.164160700  |
| H246 | -3.244345855  | 3.624679983  | -1.915476992 |
| H247 | -4.684671561  | 4.325879852  | -3.279093557 |
| H248 | -6.021431444  | 3.642628739  | -4.947273680 |
| H249 | -4.550453337  | 5.503755384  | -2.217411424 |
| H250 | -4.838063136  | 1.504279600  | -4.816547952 |
| H251 | -6.627875845  | 1.509362866  | -4.904840220 |
| H252 | 0.012136383   | 11.713930740 | -1.015914495 |
| H253 | -1.208676651  | 12.995289911 | -0.936533308 |
| H254 | -0.564391858  | 10.386328229 | -2.694559170 |
| H255 | -2.213216152  | 9.831842355  | -2.984423180 |
| H256 | -2.874273274  | 9.594649018  | -5.890905345 |
| H257 | -1.785207180  | 5.246856204  | -5.754234145 |
| H258 | -7.281232136  | 8.649504598  | -1.100214461 |
| H259 | -3.562515576  | 8.338665376  | 2.188894921  |
| H260 | -4.308366307  | 7.943045040  | -3.120468248 |
| H261 | 1.561962654   | 5.662352747  | -3.279585118 |
| H262 | 2.687480304   | 7.432134873  | -2.295900317 |
| H263 | -0.934729049  | 5.112675418  | -3.193150327 |
| H264 | -8.027957829  | -0.158685102 | -2.841502295 |
| H265 | 4.064996719   | 10.317869179 | -2.773066998 |
| H266 | -5.508574524  | -0.768546433 | -4.075814858 |
| H267 | 1.251669357   | 6.744173684  | -4.635729936 |
| H268 | -3.532909936  | 6.921397920  | 0.180249484  |
| H269 | 3.480136362   | 10.488390280 | -1.106058868 |
| H270 | -2.030258554  | 8.218014263  | -6.512753146 |
| H271 | -4.546834412  | 9.202194727  | -4.287622845 |
| H272 | -4.493987307  | -3.286744117 | -4.486606461 |
| H273 | -5.497086221  | -3.319581603 | -1.964857699 |
| H274 | -7.246622281  | 10.168177854 | 0.858011316  |
| H275 | -4.961269717  | 1.464188434  | -2.330103032 |
| H276 | -0.043866291  | 8.276023466  | -3.156752173 |
| H277 | -0.886415163  | 6.768462734  | -5.745109679 |
| H278 | 0.017133235   | 4.553313690  | -4.559973571 |
| H279 | -3.084261884  | 6.105005487  | -3.792730035 |
| H280 | 0.164002207   | 8.680205416  | 3.664514541  |
| H281 | -0.644072780  | 9.717647113  | 0.718896183  |
| H282 | -0.388646914  | 12.556014538 | 1.258816548  |
| H283 | 1.732421894   | 9.278728553  | 3.074854665  |
| H284 | -2.904961777  | 10.461012957 | 2.049979160  |
| H285 | 6.067919678   | -2.304746225 | -8.518171428 |
| H286 | 5.918327914   | -3.839821047 | -7.639588268 |
| H287 | 8.704597331   | -4.742050106 | -4.141692794 |
| H288 | 6.736000296   | -4.272176727 | -9.839685874 |
| H289 | 5.184279915   | -4.790717275 | -9.827654622 |
| H290 | 5.461614223   | 4.866719229  | 0.291207493  |
| H291 | 5.435013450   | 7.408348969  | 1.967647250  |
| H292 | 5.185329803   | 8.379964441  | -2.177847878 |
| H293 | 3.969300399   | 5.639603924  | 0.907494511  |
| H294 | 6.657001512   | 8.101193219  | 1.130063329  |
| H295 | 6.334193129   | 3.394550222  | -5.596600810 |
| H296 | 6.119350161   | 6.940330498  | -0.848380392 |
| H297 | 4.542812136   | -7.360471984 | 5.242299156  |
| H298 | 6.680595219   | -7.998355246 | 3.136963840  |
| H299 | 4.660597852   | 1.919726074  | -6.046649484 |
| H300 | 4.709434236   | -0.424316121 | 4.107467225  |
| H301 | 1.908049017   | 2.185052827  | -8.334097928 |
| H302 | -0.363804159  | -1.814802409 | -4.659211999 |
| H303 | 1.517395266   | 2.580413116  | -6.660151827 |
| H304 | 3.469240171   | -4.859453891 | 4.758110777  |

|       |              |               |              |
|-------|--------------|---------------|--------------|
| H305  | 3.145880937  | 0.538309533   | -6.143767947 |
| H306  | 3.424947858  | -5.340453816  | 3.058159297  |
| H307  | 4.295468366  | -7.551093551  | 3.489769376  |
| H308  | 5.948381109  | -5.625193839  | 3.128769521  |
| H309  | 5.907554696  | -5.322063698  | 4.872300370  |
| H310  | -4.100141076 | -0.365513666  | -7.214531947 |
| H311  | 5.254688270  | -9.769737873  | 5.081981386  |
| H312  | 4.620102326  | -11.920540477 | 3.042153329  |
| H313  | 0.888585629  | 0.276423454   | -4.100153977 |
| H314  | 5.552791998  | -12.162155101 | 5.801492820  |
| H315  | 4.072342517  | -12.466997020 | 5.171816947  |
| H316  | 5.081031071  | -3.503411221  | 2.632902029  |
| H317  | 0.003119458  | 2.469344425   | -4.797542917 |
| H318  | -2.407188599 | -1.693381885  | -6.062416930 |
| H319  | 7.981013285  | -9.728470838  | -1.138616145 |
| H320  | 7.308900328  | -7.308594434  | -3.199096432 |
| H321  | 6.701089486  | -8.097170636  | 0.360654603  |
| H322  | 7.321731976  | -10.260628412 | -2.443317210 |
| H323  | 6.323486783  | 3.334120167   | -8.423802810 |
| H324  | 6.374210625  | -4.956815009  | 0.443772682  |
| H325  | 2.253313101  | -7.788260737  | 0.591270595  |
| H326  | 4.494312323  | -1.419889496  | -7.138666317 |
| H327  | 3.331863435  | -9.093335014  | -1.005335915 |
| H328  | 4.329701853  | -6.449954790  | -6.941717177 |
| H329  | 3.166302167  | -5.095821179  | -5.146274676 |
| H330  | 6.158173790  | -12.609151732 | 3.576948704  |
| H331  | 5.498566643  | -1.316504556  | 2.878061258  |
| H332  | 8.212741948  | -5.779441683  | 1.708305804  |
| H333  | 7.198496415  | -3.687524567  | 0.782646212  |
| H334  | 8.520591133  | -6.971457918  | 3.692535571  |
| H335  | 2.792408468  | -3.090163511  | 5.444146760  |
| H336  | 4.469492482  | -7.964759237  | -3.617167873 |
| H337  | 5.464049789  | -8.364344633  | -2.212819305 |
| H338  | 2.391880916  | -8.508478857  | -2.385592300 |
| H339  | 2.343516078  | -1.704051381  | -6.019630563 |
| H340  | -2.049356751 | 2.601973834   | -6.229901000 |
| H341  | -4.048595142 | 1.416618978   | -7.223653428 |
| H342  | 2.308393761  | -6.017095748  | 0.546391163  |
| H343  | 8.424066364  | -7.291432485  | 1.404823589  |
| H344  | 7.373350486  | -9.222911366  | 1.177400032  |
| H345  | 3.418287599  | -1.503978790  | 5.751062012  |
| H346  | 6.715608706  | -7.107896361  | -6.262549602 |
| H347  | 7.075310561  | -5.720145647  | -2.485005736 |
| H348  | 1.707579725  | -2.378121311  | -7.549238887 |
| H349  | 5.229422480  | 4.739336119   | -5.959497342 |
| H350  | 7.039373674  | -0.057351347  | 5.113469585  |
| H351  | 7.318757804  | 0.482231020   | 3.441171364  |
| H352  | 10.044881760 | -6.206401048  | -5.401908631 |
| H353  | 9.241737223  | -7.538828946  | -4.895913608 |
| H354  | 10.624677273 | -8.348955013  | -0.642869660 |
| H355  | 9.100295565  | -7.913557465  | -2.282735066 |
| H356  | 12.342246603 | -7.138043258  | -2.394687618 |
| H357  | 10.341014862 | -6.682112159  | -0.092064401 |
| H358  | 10.048420123 | 0.252746569   | 3.821256889  |
| H359  | -3.805457689 | 12.812959943  | 4.156386516  |
| H360  | 9.308116325  | -7.173517955  | 6.588716936  |
| H361  | 8.814372911  | -4.668764696  | 5.506992112  |
| H362  | -5.113573424 | 12.142393419  | 1.500633739  |
| H363  | -4.822392858 | 9.964785305   | 3.665304027  |
| H364  | -6.348980362 | 10.672783247  | 3.103754011  |
| H365  | 1.322582764  | -3.120671527  | -1.148069631 |
| H366  | 4.279989095  | -1.475541167  | 0.665185110  |
| H367  | -6.258341152 | 6.873042910   | -2.117949613 |
| H368  | 0.241352826  | -0.990985763  | -0.335236176 |
| H369  | 1.907767511  | -1.231682638  | 1.436421419  |
| H370  | 1.410665642  | -1.702962714  | 1.133949015  |
| H371  | -1.801923409 | -0.166132251  | -1.219081943 |
| Mo372 | 4.224810169  | -4.157615931  | -2.112533156 |
| N373  | -6.752931456 | -7.204398435  | -2.007100152 |
| N374  | -8.850457493 | -4.826744668  | -0.021395968 |
| N375  | -8.579451647 | -5.310373895  | 2.730073929  |
| N376  | -5.884654384 | -6.085807692  | 3.149515776  |
| N377  | -4.587995926 | -3.627297136  | 2.668155470  |
| N378  | -5.735728358 | -2.177659675  | 4.875040661  |
| N379  | -4.855791647 | -3.676474648  | 7.182625338  |
| N380  | -2.257902081 | -5.098618134  | 6.952400745  |
| N381  | -0.803279034 | -3.101385951  | 5.775904347  |
| N382  | -1.504110466 | -0.197391050  | 6.585190731  |
| N383  | -2.201555685 | -0.542102875  | 9.392258541  |
| N384  | 4.861484723  | -11.820384834 | 5.130085717  |
| N385  | 5.849664771  | -9.491651589  | 4.294083420  |
| N386  | 4.425989749  | -3.541280865  | 3.418974853  |

|      |               |               |               |
|------|---------------|---------------|---------------|
| N387 | 3.451008179   | -2.347510817  | 5.186025693   |
| N388 | 5.018733308   | -1.338305975  | 3.788987826   |
| N389 | 8.422764684   | -7.148510020  | 4.716929847   |
| N390 | -5.265941869  | -2.761871553  | -4.034932757  |
| N391 | -1.318999385  | -5.364412588  | -3.873053463  |
| N392 | -5.657218185  | -0.329680233  | -3.150880202  |
| N393 | -8.114105224  | 0.663775864   | -2.248092250  |
| N394 | -8.059466465  | 0.164515396   | 0.521978544   |
| N395 | -6.031234245  | 1.864648333   | 1.457997768   |
| N396 | -2.989321805  | 2.725803609   | -1.424851236  |
| N397 | -2.330720663  | 0.701152135   | -1.085551201  |
| N398 | -6.795509708  | 4.454088056   | 2.126246815   |
| N399 | -10.046462074 | 7.516816891   | 0.535761856   |
| N400 | -10.201730973 | 9.195270530   | 1.977753366   |
| N401 | 8.921949547   | 2.574863750   | 4.047832987   |
| N402 | 6.116640394   | 7.236174940   | 1.221336511   |
| N403 | 4.449482839   | 8.680052541   | -1.543851767  |
| N404 | 1.916801750   | 8.082914676   | -2.482653371  |
| N405 | -2.551617190  | 6.692721609   | -4.458294090  |
| N406 | -2.536150220  | 8.648524764   | -5.746985147  |
| N407 | -3.946445673  | 8.469096283   | -3.919662536  |
| N408 | 0.694592245   | 6.404233913   | -0.498123585  |
| N409 | 0.642855357   | 8.141489195   | 1.701218564   |
| N410 | -0.670592646  | 10.527013375  | 1.338542083   |
| N411 | -1.576712601  | 10.504719609  | -2.561725722  |
| N412 | -3.215868512  | 11.429234000  | 2.057223071   |
| N413 | 5.766747842   | -3.948724296  | -9.802476406  |
| N414 | 3.739639871   | -1.966028554  | -7.564258162  |
| N415 | 2.565369151   | 0.775453541   | -6.965878505  |
| N416 | 4.584883249   | 2.808727149   | -6.549628402  |
| N417 | -0.046087155  | -2.239935506  | -10.419416998 |
| N418 | -1.880872831  | -0.564771579  | -8.998745262  |
| N419 | 9.123559418   | -6.543412966  | -5.108721953  |
| N420 | 5.017095964   | -5.309628884  | -4.054468526  |
| N421 | 4.775849346   | -6.168400322  | -6.072765585  |
| N422 | 9.750811188   | -7.148223197  | -2.086699705  |
| N423 | -0.231161278  | 2.470637242   | 0.266572942   |
| N424 | 2.161913814   | 1.263451191   | 3.562495621   |
| N425 | 0.643691586   | 2.011593140   | -0.246077796  |
| N426 | 2.652548836   | 0.400175379   | 3.065978727   |
| O427 | -6.634153033  | -5.313724287  | 0.165952877   |
| O428 | -7.793762665  | -3.188973551  | 3.023314984   |
| O429 | -6.159633568  | -5.664401436  | 5.376570161   |
| O430 | -3.083291528  | -4.245077477  | 4.274200794   |
| O431 | -3.881456239  | -0.867859329  | 4.785347606   |
| O432 | -4.678637807  | -1.649215526  | 8.235175657   |
| O433 | -2.009683965  | -4.593066058  | 9.173900690   |
| O434 | 1.196386784   | -4.172629337  | 6.167557814   |
| O435 | 0.763806799   | -0.343853012  | 6.808101554   |
| O436 | -0.717714297  | 1.136846498   | 9.754627778   |
| O437 | -0.444721165  | -1.108120822  | 12.466414099  |
| O438 | 6.837816545   | -10.401009715 | 2.412512984   |
| O439 | 7.119003297   | -8.006676589  | 6.405407375   |
| O440 | 10.777527447  | -4.777341174  | 6.053058474   |
| O441 | -5.568713070  | -0.897913155  | -0.929663988  |
| O442 | -2.916732618  | -4.092712371  | -4.877288774  |
| O443 | -7.026021851  | 2.460818285   | -1.355444519  |
| O444 | -5.778985382  | 3.237629823   | -4.095333780  |
| O445 | -10.060331156 | 1.261094324   | 0.767554081   |
| O446 | -6.336903789  | 1.138967956   | 3.601159094   |
| O447 | -4.907044191  | 4.708728924   | 3.386261868   |
| O448 | -7.479019701  | 6.815575252   | 4.680062293   |
| O449 | 9.945340812   | -0.324890087  | 5.775790768   |
| O450 | 2.803904413   | 4.442640159   | 4.797955445   |
| O451 | 3.497486238   | 8.426803847   | 0.512764475   |
| O452 | 1.340307409   | 10.306319835  | -2.586599588  |
| O453 | -1.294974482  | 7.251885844   | -1.240956079  |
| O454 | -1.189975027  | 7.012850780   | 2.501862574   |
| O455 | 2.041976872   | 5.636405134   | 2.260260935   |
| O456 | 0.217614571   | 11.408001788  | 3.261037378   |
| O457 | -2.813343299  | 13.490817548  | 1.170296460   |
| O458 | -3.226160564  | 11.041947197  | -1.074245630  |
| O459 | -5.712310747  | 13.398159827  | 3.714991355   |
| O460 | -5.364684367  | 6.885706626   | -1.723502794  |
| O461 | 3.224118414   | -3.903683001  | -8.686449928  |
| O462 | 1.123399558   | -0.103649127  | -8.517128591  |
| O463 | 3.346170907   | 4.251220160   | -7.797269422  |
| O464 | 7.160612977   | 5.057404509   | -7.719259775  |
| O465 | -3.494459862  | -2.017155778  | -9.693637235  |
| O466 | -0.371972579  | -6.129923158  | -6.647305310  |
| O467 | 1.636757830   | -5.243919211  | -7.039863193  |
| O468 | -2.648564622  | 2.910438429   | -8.778728858  |

|                                                                                     |                                   |              |               |              |
|-------------------------------------------------------------------------------------|-----------------------------------|--------------|---------------|--------------|
|                                                                                     | O469                              | 10.515634754 | -5.047237778  | -2.456956367 |
|                                                                                     | O470                              | 12.927329346 | -6.631573005  | -0.506064126 |
|                                                                                     | O471                              | 0.627325065  | -6.138162849  | -1.752339110 |
|                                                                                     | O472                              | -0.214353711 | -7.330893257  | -0.040108288 |
|                                                                                     | O473                              | 5.806567762  | -10.603650435 | -3.242825710 |
|                                                                                     | O474                              | 3.584880478  | -10.627198899 | -3.660130993 |
|                                                                                     | O475                              | 5.308690705  | -5.644122686  | -0.899800271 |
|                                                                                     | O476                              | 5.067202563  | -7.467273489  | 0.388820582  |
|                                                                                     | O477                              | 3.015075679  | -5.924823178  | -2.120413034 |
|                                                                                     | O478                              | 8.773804734  | -6.549218162  | 1.972581702  |
|                                                                                     | O479                              | 6.877461928  | -4.519777269  | 1.180020349  |
|                                                                                     | O480                              | -4.025437149 | 4.888621996   | -2.788852461 |
|                                                                                     | O481                              | 8.212337198  | -10.161947705 | -1.990085273 |
|                                                                                     | O482                              | 7.580008947  | -8.546369368  | 0.483516922  |
|                                                                                     | S483                              | 3.786153652  | 5.136214726   | -1.465765179 |
|                                                                                     | S484                              | 2.547004643  | 2.179804123   | -2.887228217 |
|                                                                                     | S485                              | 2.687196452  | -3.058198681  | -3.575066170 |
|                                                                                     | S486                              | 3.628811136  | 1.839603807   | 0.428817447  |
|                                                                                     | S487                              | 0.718984272  | -0.718849414  | -1.586706033 |
|                                                                                     | S488                              | 4.949078489  | -0.317755958  | -4.894516137 |
|                                                                                     | S489                              | 3.369519691  | -3.435509911  | -0.033942206 |
|                                                                                     | S490                              | 6.066502940  | 2.011132683   | -2.185864528 |
|                                                                                     | S491                              | 6.140743541  | -2.785690333  | -2.294656619 |
|                                                                                     | S492                              | 6.421779490  | -0.749845507  | 0.478971973  |
|                                                                                     | end                               |              |               |              |
| <b>Fe2-brNH-NH-Fe6<br/>2N2 associated<br/>35, S=3/2</b>                             |                                   |              |               |              |
| <b>Fe( 139) -2.438</b>                                                              |                                   |              |               |              |
| <b>Fe( 140) 0.115</b>                                                               |                                   |              |               |              |
| <b>Fe( 141) -2.517</b>                                                              |                                   |              |               |              |
| <b>Fe( 142) 2.624</b>                                                               |                                   |              |               |              |
| <b>Fe( 143) 2.483</b>                                                               |                                   |              |               |              |
| <b>Fe( 144) 2.252</b>                                                               |                                   |              |               |              |
| <b>Fe( 145) 0.162</b>                                                               |                                   |              |               |              |
| 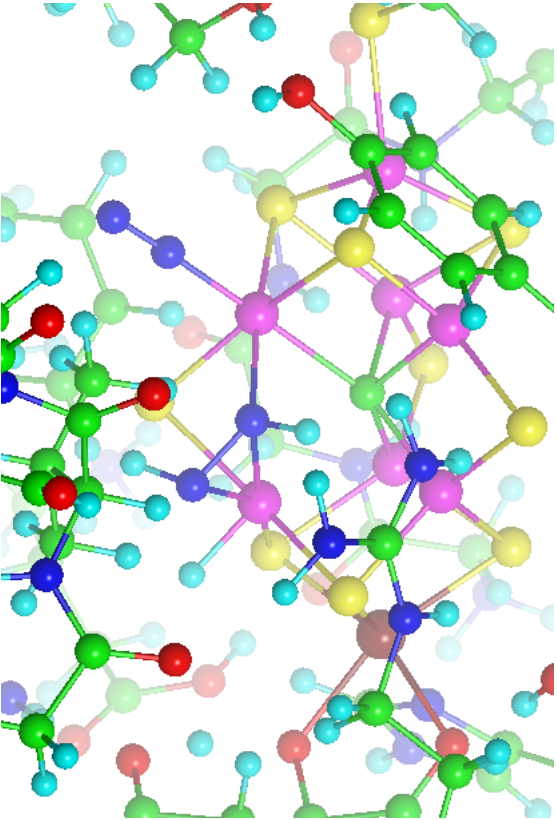 |                                   |              |               |              |
|                                                                                     | <b>bm526hx26n2h22n2xdtg.car_5</b> |              |               |              |
|                                                                                     | C1                                | -2.565267148 | -6.273854802  | -6.637483287 |
|                                                                                     | C2                                | -1.675700242 | -6.484369468  | -7.868743156 |
|                                                                                     | C3                                | -4.864740174 | -6.004015836  | -5.814070538 |
|                                                                                     | C4                                | -4.844927548 | -6.982360655  | -4.642048448 |
|                                                                                     | C5                                | -4.367850961 | -9.258076657  | -3.871616424 |
|                                                                                     | C6                                | -3.242087947 | -8.994463080  | -2.869963139 |
|                                                                                     | C7                                | -1.107436490 | -7.892710725  | -2.430423367 |
|                                                                                     | C8                                | -1.597801774 | -6.806035343  | -1.471987874 |
|                                                                                     | C9                                | -2.979587085 | -4.794328162  | -1.208340663 |
|                                                                                     | C10                               | -3.929456725 | -5.349575121  | -0.137753965 |
|                                                                                     | C11                               | -5.665000346 | -6.913658176  | 0.465356156  |
|                                                                                     | C12                               | -4.980756099 | -7.725398740  | 1.574682898  |
|                                                                                     | C13                               | -3.461234344 | -9.578279500  | 2.087507502  |
|                                                                                     | C14                               | -2.190459656 | -9.196441747  | 2.859703907  |
|                                                                                     | C15                               | 0.004484239  | -8.081454853  | 2.780654274  |
|                                                                                     | C16                               | 0.115708442  | -6.629603255  | 3.248516871  |
|                                                                                     | C17                               | -1.024712684 | -4.429864494  | 3.266146942  |
|                                                                                     | C18                               | -2.072264029 | -4.155831679  | 4.356917337  |
|                                                                                     | C19                               | -1.172644300 | -3.571913207  | 1.988773346  |
|                                                                                     | C20                               | -1.219099305 | -2.082781191  | 2.345930059  |
|                                                                                     | C21                               | -0.042385477 | -3.884029981  | 1.003432213  |
|                                                                                     | C22                               | -4.452608260 | -4.115841598  | 4.964641145  |
|                                                                                     | C23                               | -4.595543598 | -5.288850059  | 5.955444608  |
|                                                                                     | C24                               | -5.771135705 | -3.772935341  | 4.232204548  |
|                                                                                     | C25                               | -6.929745661 | -3.643454380  | 5.226382874  |
|                                                                                     | C26                               | -5.612648147 | -2.485374070  | 3.412597365  |
|                                                                                     | C27                               | -4.854546146 | -7.674740385  | 6.314327940  |
|                                                                                     | C28                               | -3.799875968 | -7.750456069  | 7.401708799  |
|                                                                                     | C29                               | 9.474555822  | -9.469545835  | 1.982770269  |
|                                                                                     | C30                               | 9.373062477  | -8.078767639  | 2.602590035  |
|                                                                                     | C31                               | 7.919784528  | -6.666759158  | 4.047721946  |
|                                                                                     | C32                               | 8.159400506  | -6.713484588  | 5.567721271  |
|                                                                                     | C33                               | 6.439125963  | -6.394311937  | 3.731720888  |
|                                                                                     | C34                               | 5.956565792  | -5.058192595  | 4.287695308  |
|                                                                                     | C35                               | 4.563706353  | -4.691225621  | 3.783904028  |
|                                                                                     | C36                               | 3.147857919  | -2.867714383  | 4.762589912  |
|                                                                                     | C37                               | 9.067555545  | -5.499904588  | 7.492542086  |
|                                                                                     | C38                               | 8.313022308  | -4.373762161  | 8.162639743  |
|                                                                                     | C39                               | -1.343040842 | -1.902540699  | -5.716921816 |
|                                                                                     | C40                               | -2.645927534 | -1.273327326  | -5.188307532 |
|                                                                                     | C41                               | -0.253040293 | -1.726239101  | -4.636620162 |
|                                                                                     | C42                               | 1.033828415  | -2.549633155  | -4.842446821 |
|                                                                                     | C43                               | 2.118659272  | -1.885943697  | -5.690562381 |
|                                                                                     | C44                               | -3.933433776 | 0.828305588   | -5.226055946 |
|                                                                                     | C45                               | -5.358100976 | 0.259382077   | -5.220132257 |
|                                                                                     | C46                               | -3.843854909 | 2.163316376   | -5.977457783 |
|                                                                                     | C47                               | -6.958861878 | -1.256061112  | -6.290952372 |
|                                                                                     | C48                               | -7.308235474 | -2.161658666  | -5.105018005 |
|                                                                                     | C49                               | -6.508599231 | -3.348812068  | -3.114067359 |
|                                                                                     | C50                               | -6.338227642 | -2.584162664  | -1.799843791 |
|                                                                                     | C51                               | -5.948112036 | -0.442504027  | -0.676149700 |
|                                                                                     | C52                               | -7.317916272 | -0.042218170  | -0.066670079 |
|                                                                                     | C53                               | -5.207389031 | 0.878589082   | -0.930790647 |
|                                                                                     | C54                               | -3.771690944 | 0.826821382   | -1.354963683 |
|                                                                                     | C55                               | -2.757774591 | -0.098282389  | -1.283590978 |

|      |               |              |              |
|------|---------------|--------------|--------------|
| C56  | -1.894261520  | 1.766811946  | -2.125993383 |
| C57  | -9.645914014  | 0.598769287  | -0.592001830 |
| C58  | -10.281339558 | -0.280097787 | 0.482900240  |
| C59  | -10.514933624 | 0.636566059  | -1.869542332 |
| C60  | -11.712457924 | 1.541518365  | -1.835800496 |
| C61  | -12.664348106 | 1.745856165  | -0.856607336 |
| C62  | -13.105121972 | 2.994801315  | -2.632521897 |
| C63  | 3.894378293   | 0.812605750  | 9.190562391  |
| C64  | 5.337471850   | 0.383206936  | 9.378828455  |
| C65  | 3.415082502   | 0.202813285  | 7.849713620  |
| C66  | 1.966988662   | 0.504295560  | 7.547021183  |
| C67  | 0.935805424   | -0.348868208 | 7.980997636  |
| C68  | 1.608397343   | 1.650459265  | 6.818521690  |
| C69  | -0.405420635  | -0.076138220 | 7.690840454  |
| C70  | 0.274810670   | 1.944228323  | 6.534441165  |
| C71  | -0.731881551  | 1.074233268  | 6.962593641  |
| C72  | 0.131154420   | 6.964769467  | 5.471845096  |
| C73  | -1.171636254  | 7.649903318  | 5.022777298  |
| C74  | 0.324780603   | 5.638382213  | 4.735601154  |
| C75  | -2.161486261  | 9.630742315  | 3.925242359  |
| C76  | -2.870279095  | 9.165463314  | 2.651027621  |
| C77  | -2.848464868  | 7.436008919  | 0.850920490  |
| C78  | -3.545373241  | 6.117543534  | 1.274723998  |
| C79  | -1.698767249  | 7.203895721  | -0.154361333 |
| C80  | -1.966537388  | 6.395342098  | -1.428638265 |
| C81  | -2.711361361  | 7.110653013  | -2.565717118 |
| C82  | -5.105388356  | 7.801269094  | -2.627399680 |
| C83  | -3.505345131  | 4.077823757  | 2.627849630  |
| C84  | -4.754467402  | 4.268121067  | 3.502493906  |
| C85  | -2.510742325  | 3.190698431  | 3.408083279  |
| C86  | -5.611409282  | 5.425688963  | 5.483777898  |
| C87  | -6.727140471  | 6.450872690  | 5.354686738  |
| C88  | -7.800281991  | 8.106341271  | 3.920861679  |
| C89  | -9.285216255  | 7.774174145  | 3.640487378  |
| C90  | -7.263816455  | 9.115285850  | 2.904219154  |
| C91  | -7.313995148  | 8.635907706  | 1.459004912  |
| C92  | -10.905274941 | 6.061743707  | 2.958872054  |
| C93  | -11.940875985 | 6.148394826  | 4.071706200  |
| C94  | -10.829445950 | 4.610784019  | 2.404887690  |
| C95  | -9.912032791  | 4.507344488  | 1.206625666  |
| C96  | -10.402597591 | 4.758965882  | -0.084054831 |
| C97  | -8.544015696  | 4.217617838  | 1.347922378  |
| C98  | -9.558698875  | 4.750371575  | -1.196670941 |
| C99  | -7.678057200  | 4.231249574  | 0.250116685  |
| C100 | -8.197454021  | 4.504674336  | -1.012378334 |
| C101 | 8.930954880   | 4.139360612  | -4.065878817 |
| C102 | 7.616645635   | 3.702281228  | -4.689632741 |
| C103 | 5.151654058   | 3.632919483  | -4.364321895 |
| C104 | 4.241681909   | 4.854917809  | -4.544969626 |
| C105 | 3.038926650   | 6.638144105  | -3.352645121 |
| C106 | 3.342033497   | 7.664865540  | -2.264801935 |
| C107 | 4.352257396   | 8.231550954  | -0.127470145 |
| C108 | 5.103794867   | 9.480237176  | -0.548684999 |
| C109 | 4.080888971   | 3.154317771  | -8.781124929 |
| C110 | 2.589326917   | 3.494169596  | -8.880682813 |
| C111 | 4.270986132   | 1.898187131  | -7.900517544 |
| C112 | 5.678117575   | 1.296457618  | -8.072400953 |
| C113 | 5.920921288   | 0.224664277  | -7.034277366 |
| C114 | 0.667512097   | 4.648191911  | -7.918435498 |
| C115 | 0.512197642   | 6.097739667  | -7.505287957 |
| C116 | -0.321975824  | 3.671209347  | -7.239443415 |
| C117 | 0.120992953   | 3.382601480  | -5.834820413 |
| C118 | -0.207547957  | 4.255585428  | -4.785232350 |
| C119 | 1.029097036   | 2.335606677  | -5.594814005 |
| C120 | 0.427307879   | 4.132481299  | -3.545258019 |
| C121 | 1.650679692   | 2.208870491  | -4.353498198 |
| C122 | 1.384337732   | 3.137533023  | -3.341337280 |
| C123 | 11.164239644  | 0.470847625  | 0.269154738  |
| C124 | 11.610868185  | 0.019920632  | 1.670368457  |
| C125 | 10.115338986  | -0.501476152 | -0.288364696 |
| C126 | 9.442617207   | -0.105190509 | -1.563836528 |
| C127 | 10.031725008  | 0.218574037  | -2.768529851 |
| C128 | 7.843012986   | 0.041978939  | -3.055872334 |
| C129 | 12.445412172  | -1.729860101 | 3.129136787  |
| C130 | 13.482508009  | -0.831323685 | 3.766587901  |
| C131 | 4.597422132   | -4.654870374 | -2.176504242 |
| C132 | 5.522242475   | -4.559605038 | -0.966383822 |
| C133 | 6.735431452   | -3.602330402 | -1.162180168 |
| C134 | 7.771166323   | -4.252811063 | -2.120319537 |
| C135 | 9.138184969   | -3.565738759 | -2.172424445 |
| C136 | 10.216216221  | -4.338753196 | -2.964446196 |
| C137 | 7.428074219   | -3.366686232 | 0.187980126  |



|       |              |               |              |
|-------|--------------|---------------|--------------|
| C138  | 3.788027404  | 1.779957174   | 0.917605156  |
| Fe139 | 5.293319488  | 1.920595331   | -0.345078485 |
| Fe140 | 1.602473022  | 1.718346344   | 0.886742344  |
| Fe141 | 3.678567510  | 2.343799977   | 2.827304709  |
| Fe142 | 3.722906328  | 3.681074552   | 0.599158848  |
| Fe143 | 1.846053070  | 4.148320906   | 2.448445197  |
| Fe144 | 5.138859754  | 0.563429507   | 1.785248255  |
| Fe145 | 3.366027940  | -0.261531144  | -0.140946496 |
| H146  | 0.077249987  | -6.857672523  | -6.892338433 |
| H147  | -0.063126800 | -5.318301985  | -7.407097625 |
| H148  | -4.243188595 | -6.339441893  | -7.830406152 |
| H149  | -2.030816513 | -5.824727102  | -8.676502358 |
| H150  | -1.852032641 | -7.515160080  | -8.220025556 |
| H151  | -4.679139729 | -5.005968745  | -5.393035169 |
| H152  | -4.235514556 | -8.500860555  | -5.880532501 |
| H153  | -5.870884920 | -6.004984528  | -6.252909951 |
| H154  | -4.203872316 | -10.238371004 | -4.338452230 |
| H155  | -2.174018346 | -7.932837782  | -4.276114970 |
| H156  | -5.296354204 | -9.306080157  | -3.290004324 |
| H157  | -2.222398733 | -4.196635205  | -0.686395488 |
| H158  | -2.514143836 | -5.822482788  | -3.032104664 |
| H159  | -0.262381238 | -7.512615108  | -3.021394664 |
| H160  | -6.222877829 | -6.106716751  | 0.958372509  |
| H161  | -4.815286285 | -6.628277866  | -1.498915450 |
| H162  | -0.754531844 | -8.729569187  | -1.815759123 |
| H163  | -3.536463150 | -4.126798249  | -1.879857100 |
| H164  | -3.815173097 | -8.688866329  | 0.172126551  |
| H165  | -6.379387443 | -7.564258121  | -0.057663589 |
| H166  | -0.020948673 | -4.949092819  | 0.737537833  |
| H167  | -0.183997366 | -3.316278074  | 0.070160745  |
| H168  | 0.934297372  | -3.584408589  | 1.408161009  |
| H169  | -2.129454501 | -3.846316509  | 1.519643015  |
| H170  | -3.235687951 | -10.488919268 | 1.513761351  |
| H171  | -4.850229633 | -2.583542979  | 2.627867916  |
| H172  | -4.717282630 | -6.701275201  | 4.421395576  |
| H173  | -7.108510501 | -4.576991777  | 5.778931571  |
| H174  | -0.275087106 | -1.750902938  | 2.804154328  |
| H175  | -2.040327403 | -1.850032600  | 3.040714764  |
| H176  | 3.302609883  | 0.349453646   | 10.003435034 |
| H177  | -6.560673494 | -2.224665350  | 2.920405869  |
| H178  | -7.853690701 | -3.380546319  | 4.691629601  |
| H179  | -5.329464433 | -1.643781364  | 4.066133412  |
| H180  | -6.725316987 | -2.847151836  | 5.959621335  |
| H181  | -5.996442290 | -4.603669508  | 3.538511490  |
| H182  | -4.160525487 | -3.261498429  | 5.593700197  |
| H183  | -3.612460387 | -4.574304039  | 3.037466555  |
| H184  | -1.373467873 | -1.478073711  | 1.440416599  |
| H185  | -1.532147770 | 3.227174937   | 2.902478331  |
| H186  | -2.889090847 | 2.160187699   | 3.358500581  |
| H187  | -2.356283583 | 2.818485989   | 5.335986669  |
| H188  | -2.639441590 | 0.704344084   | 6.941329619  |
| H189  | 0.010248186  | 2.825505429   | 5.950908244  |
| H190  | 2.389277812  | 2.314368742   | 6.441999796  |
| H191  | 1.183416000  | -1.249617077  | 8.548333495  |
| H192  | -1.712430107 | -6.279760756  | 2.440688658  |
| H193  | 0.818213359  | -8.253717711  | 2.060940545  |
| H194  | 0.182766929  | -8.725474653  | 3.651308145  |
| H195  | -1.435593644 | -8.169072500  | 1.213788772  |
| H196  | -4.214805314 | -9.823814234  | 2.844834078  |
| H197  | -1.191122431 | -0.761736815  | 8.018746468  |
| H198  | -0.066461576 | -4.178323854  | 3.733436657  |
| H199  | -5.849530580 | -7.672708699  | 6.785414942  |
| H200  | -4.764708987 | -8.590283168  | 5.709932127  |
| H201  | -2.822616471 | -7.280241730  | 7.144437825  |
| H202  | 10.144963344 | -5.380450779  | 7.683391209  |
| H203  | 4.150905640  | -1.822457464  | -5.938188300 |
| H204  | 5.148989891  | -2.826628222  | -2.420646660 |
| H205  | 5.758002452  | 0.836257081   | -9.067714232 |
| H206  | 6.440272196  | 2.084756874   | -7.990708321 |
| H207  | 3.521183697  | 1.135558417   | -8.160918975 |
| H208  | 1.420566046  | 6.723523969   | -7.670680322 |
| H209  | 4.351066923  | 2.877539629   | -9.812100475 |
| H210  | -0.002779308 | -0.655884081  | -4.556764231 |
| H211  | 0.794653488  | -3.516235961  | -5.319031258 |
| H212  | 2.649701815  | 4.558456483   | -7.095863330 |
| H213  | 0.407173701  | 4.656182555   | -8.998079215 |
| H214  | 4.789821068  | 4.568272100   | -7.433306994 |
| H215  | 3.621879773  | -2.788319794  | -4.564277402 |
| H216  | 4.088985886  | 2.170343226   | -6.848850790 |
| H217  | 5.867328070  | 4.150532474   | -8.606920271 |
| H218  | -1.266499359 | -1.849431120  | -7.782275189 |
| H219  | -0.697295920 | -2.030421702  | -3.677737497 |

|      |               |              |              |
|------|---------------|--------------|--------------|
| H220 | 6.889117131   | 1.560526331  | -5.968818034 |
| H221 | 1.458987663   | -2.802207692 | -3.859825093 |
| H222 | -5.440868523  | -1.039503957 | 0.094577032  |
| H223 | -2.758671853  | -1.126020873 | -0.943415233 |
| H224 | -7.547951016  | -3.705090265 | -3.139352454 |
| H225 | -5.316004520  | -2.274843452 | -4.520110484 |
| H226 | -8.195179515  | -0.284589275 | -1.905642206 |
| H227 | -12.781692384 | 1.348020529  | 0.145068119  |
| H228 | -10.041737102 | -1.366008328 | 0.377327998  |
| H229 | -10.808554272 | -0.395277761 | -2.133536172 |
| H230 | -9.522879588  | 1.613718273  | -0.182593258 |
| H231 | -13.621389412 | 3.712747873  | -3.265706673 |
| H232 | -5.262493919  | 1.452839362  | 0.008636050  |
| H233 | -5.765890084  | 1.452639858  | -1.687845204 |
| H234 | -14.356877528 | 3.054605183  | -0.912865402 |
| H235 | -9.877702569  | 0.995271328  | -2.692936548 |
| H236 | -5.999124532  | -0.786395285 | -2.796486281 |
| H237 | -5.865845581  | -4.240957609 | -3.075561434 |
| H238 | -7.765750296  | -0.513186291 | -6.358485570 |
| H239 | -1.182654047  | 2.482667923  | -2.528341196 |
| H240 | -6.985156503  | -1.863479357 | -7.204997792 |
| H241 | 3.957974347   | 2.648127845  | 10.098438709 |
| H242 | 2.896078470   | 2.567275372  | 8.859456597  |
| H243 | -1.924668511  | 5.531485213  | 2.456708993  |
| H244 | -3.836732055  | 3.519612803  | 1.739904094  |
| H245 | -3.823748028  | 5.839479304  | 4.432999782  |
| H246 | -3.739176297  | 2.842928696  | -2.121039251 |
| H247 | -4.820603277  | 3.768746388  | -3.737424770 |
| H248 | -4.853906395  | 3.845196564  | -6.000206441 |
| H249 | -5.745272630  | 4.043178509  | -2.470438742 |
| H250 | -2.798467947  | 2.510707052  | -5.939745269 |
| H251 | -4.131428186  | 2.018646641  | -7.030887536 |
| H252 | -6.250264613  | 9.428170639  | 3.191635695  |
| H253 | -7.909840667  | 10.005473980 | 2.961150290  |
| H254 | -5.384090856  | 9.323779602  | 1.139329612  |
| H255 | -6.218167197  | 8.603837455  | -0.234548063 |
| H256 | -5.562679702  | 9.776520156  | -2.903331739 |
| H257 | -2.322805920  | 6.768231367  | -3.537011423 |
| H258 | -9.960372192  | 4.936525076  | -2.196384763 |
| H259 | -8.124912010  | 3.963820791  | 2.325070444  |
| H260 | -6.640708658  | 6.504473523  | -2.164210881 |
| H261 | -0.888885328  | 6.692179152  | 0.390024434  |
| H262 | -1.405828565  | 7.783030883  | 2.382126626  |
| H263 | -2.460554982  | 5.438468935  | -1.197693799 |
| H264 | -4.932203538  | -0.854750096 | -6.878453492 |
| H265 | -1.830300659  | 10.665948989 | 3.768985926  |
| H266 | -2.256999364  | 0.172218417  | -6.502620342 |
| H267 | -1.300733658  | 8.193851626  | -0.431303359 |
| H268 | -6.611068569  | 4.058001879  | 0.390899871  |
| H269 | -2.924944342  | 9.638384403  | 4.716524646  |
| H270 | -3.946486596  | 9.351518839  | -3.322670416 |
| H271 | -7.132088745  | 8.055734825  | -2.765940227 |
| H272 | 0.070442823   | -1.183024262 | -7.029937846 |
| H273 | -1.553055329  | -2.984201399 | -5.808459474 |
| H274 | -11.465123369 | 4.966641114  | -0.228530460 |
| H275 | -3.708892288  | 1.008149950  | -4.164727829 |
| H276 | -3.635374861  | 8.062788993  | 0.417814558  |
| H277 | -2.518619014  | 8.189258755  | -2.508848728 |
| H278 | -0.975790452  | 6.137849030  | -1.825220777 |
| H279 | -4.450987426  | 5.874938067  | -2.560442409 |
| H280 | -6.078654954  | 4.443069508  | 5.648490532  |
| H281 | -6.241914549  | 6.715935944  | 3.386845921  |
| H282 | -7.832966057  | 8.615926282  | 4.896844224  |
| H283 | -5.038316842  | 5.685815951  | 6.383763693  |
| H284 | -8.807179899  | 5.833465001  | 3.306392341  |
| H285 | 8.775936678   | 5.042920288  | -3.458364927 |
| H286 | 9.209954518   | 3.325636871  | -3.363675155 |
| H287 | 10.698291102  | 1.455796952  | 0.423243915  |
| H288 | 10.848971869  | 4.471775043  | -4.666330337 |
| H289 | 9.964751949   | 3.599432422  | -5.733993783 |
| H290 | 1.258938621   | 5.190293677  | 5.101645814  |
| H291 | -0.743545345  | 6.177137093  | 7.137473293  |
| H292 | -0.089790927  | 9.196296731  | 4.201420937  |
| H293 | -0.515547196  | 4.964655002  | 4.954734511  |
| H294 | 0.075006878   | 7.562755151  | 7.438892652  |
| H295 | 4.962874567   | 7.719835649  | 0.632411406  |
| H296 | 0.987027897   | 7.624607687  | 5.260089405  |
| H297 | 5.830056127   | -7.226345581 | 4.123803351  |
| H298 | 8.533690536   | -5.876520303 | 3.597283441  |
| H299 | 4.542666950   | 6.368934838  | -1.149035420 |
| H300 | 2.164595335   | -1.190674713 | 5.413549525  |
| H301 | 3.118800328   | 7.145194647  | -4.322498979 |

|       |               |               |              |
|-------|---------------|---------------|--------------|
| H302  | 2.348473381   | 1.390552616   | -4.160878727 |
| H303  | 1.978746880   | 6.357828468   | -3.227099418 |
| H304  | 3.811716982   | -5.366213016  | 4.208756071  |
| H305  | 4.096838525   | 4.945129721   | -2.518035034 |
| H306  | 4.509348966   | -4.782543206  | 2.686768744  |
| H307  | 6.338484531   | -6.396446020  | 2.634689630  |
| H308  | 6.654239344   | -4.264238624  | 3.983139772  |
| H309  | 5.941570622   | -5.070943469  | 5.388419399  |
| H310  | -0.351694835  | 2.753370208   | -7.843626044 |
| H311  | 7.760869046   | -8.765721703  | 3.567645031  |
| H312  | 9.181723973   | -9.346099136  | 0.928418389  |
| H313  | 1.887127067   | 3.037560622   | -2.380158940 |
| H314  | 9.078745693   | -10.930605886 | 3.379004230  |
| H315  | 8.331049080   | -11.180527924 | 1.944017274  |
| H316  | 4.972675023   | -2.622633128  | 3.919273468  |
| H317  | 0.196988688   | 4.826431929   | -2.734617740 |
| H318  | 1.256611158   | 1.622115256   | -6.390842300 |
| H319  | 11.873654954  | -4.267248781  | 0.630794919  |
| H320  | 10.592446437  | -1.482555450  | -0.455821923 |
| H321  | 9.479137830   | -4.286882540  | 1.548074149  |
| H322  | 12.113935629  | -4.094358733  | -0.894740139 |
| H323  | 5.707811079   | 9.371616526   | -1.481326048 |
| H324  | 7.475370452   | -2.045581194  | 2.455356480  |
| H325  | 5.856106537   | -5.566765480  | -0.691570445 |
| H326  | 6.616016340   | 4.456632254   | -3.075129987 |
| H327  | 7.906282202   | -5.292469548  | -1.782665418 |
| H328  | 9.110925867   | 0.480275033   | -4.683536037 |
| H329  | 6.885790204   | 0.016799952   | -3.562000291 |
| H330  | 10.542787283  | -9.743923006  | 1.982312701  |
| H331  | 3.755177743   | -0.878675831  | 4.783756087  |
| H332  | 8.851976667   | -2.873889062  | 4.193686332  |
| H333  | 7.258191292   | -1.045277695  | 3.621594498  |
| H334  | 9.091706457   | -4.849704709  | 5.444737335  |
| H335  | 2.000319732   | -4.615879921  | 4.645304957  |
| H336  | 9.032239564   | -2.576044256  | -2.642301688 |
| H337  | 9.522479173   | -3.395887053  | -1.157171001 |
| H338  | 7.330844364   | -4.296128515  | -3.128065238 |
| H339  | 4.740815690   | 2.958499599   | -3.596653060 |
| H340  | -0.923461482  | 5.061786677   | -4.963346335 |
| H341  | -1.316296661  | 4.141330762   | -7.270041146 |
| H342  | 4.898886886   | -4.178924512  | -0.139250586 |
| H343  | 9.971080742   | -3.776289864  | 3.594929446  |
| H344  | 10.346223238  | -5.422474053  | 2.136300048  |
| H345  | 1.325750111   | -3.322963225  | 5.564127629  |
| H346  | 11.073723157  | 0.361400540   | -3.029532890 |
| H347  | 9.350917222   | -0.672069128  | 0.477925998  |
| H348  | 5.201817194   | 3.104642360   | -5.319049567 |
| H349  | 3.402285598   | 8.526143443   | 0.345205951  |
| H350  | 3.570032544   | -0.884704864  | 7.900703756  |
| H351  | 4.053182276   | 0.592563377   | 7.040048834  |
| H352  | 12.956631930  | 1.323444748   | -0.246766589 |
| H353  | 12.810021101  | -0.221374431  | -0.765259997 |
| H354  | 12.904357342  | -2.723598462  | 3.002412630  |
| H355  | 12.086016241  | -1.926165723  | 1.036380433  |
| H356  | 14.118731935  | -0.266996943  | 3.043279423  |
| H357  | 11.585441659  | -1.845928540  | 3.807990716  |
| H358  | 6.081469135   | 1.026993423   | 8.849914955  |
| H359  | -11.521803499 | 6.143463755   | 5.106070072  |
| H360  | 8.742830962   | -6.439241475  | 7.974840181  |
| H361  | 7.354924086   | -4.081127538  | 7.667626914  |
| H362  | -11.232233006 | 6.736426420   | 2.150477973  |
| H363  | -10.492695006 | 3.937779246   | 3.208549914  |
| H364  | -11.851962099 | 4.312781187   | 2.132139394  |
| H365  | 3.243027409   | -1.442568013  | -1.039697723 |
| H366  | 2.492772442   | -0.352992063  | 2.214905998  |
| H367  | -7.830283853  | 4.541630078   | -2.925460042 |
| H368  | 1.152854290   | -1.142654054  | -0.081218286 |
| H369  | -0.616903963  | 0.181154050   | -1.691757096 |
| Mo370 | 6.213838208   | -0.664070542  | -0.377277670 |
| N371  | -0.250011324  | -6.286988513  | -7.675866233 |
| N372  | -3.909596480  | -6.309061363  | -6.870022972 |
| N373  | -4.475899665  | -8.256858011  | -4.921789210 |
| N374  | -2.151195259  | -8.341317403  | -3.341288799 |
| N375  | -2.351413332  | -5.822218890  | -2.026428056 |
| N376  | -4.742803038  | -6.363581747  | -0.513258710 |
| N377  | -4.013719089  | -8.590884281  | 1.171703566  |
| N378  | -1.270186855  | -8.448187660  | 2.186651443  |
| N379  | -0.958734907  | -5.854585778  | 2.977598210  |
| N380  | -3.372342883  | -4.344506683  | 4.005231510  |
| N381  | -4.654754515  | -6.539405209  | 5.429273323  |
| N382  | 8.590636811   | -10.456815209 | 2.615882948  |
| N383  | 8.325790839   | -7.920307002  | 3.435087629  |

|      |               |              |              |
|------|---------------|--------------|--------------|
| N384 | 4.251393414   | -3.309903044 | 4.154416287  |
| N385 | 2.140901794   | -3.703590722 | 5.092846448  |
| N386 | 3.051178120   | -1.566459528 | 5.091048984  |
| N387 | 8.784067356   | -5.621320817 | 6.076551603  |
| N388 | -0.960575954  | -1.280195882 | -6.990415425 |
| N389 | 3.386074896   | -2.220053590 | -5.382773856 |
| N390 | -2.948970590  | -0.086430885 | -5.778416473 |
| N391 | -5.664474733  | -0.599628742 | -6.219325769 |
| N392 | -6.273216395  | -2.592461823 | -4.330105613 |
| N393 | -6.065446577  | -1.246548025 | -1.883980125 |
| N394 | -3.198092128  | 1.975138250  | -1.888782406 |
| N395 | -1.613592384  | 0.507629171  | -1.774730764 |
| N396 | -8.342394264  | 0.046454502  | -0.955190287 |
| N397 | -12.000782293 | 2.327006883  | -2.941918051 |
| N398 | -13.538578648 | 2.674930628  | -1.381017727 |
| N399 | 3.832301847   | 2.275719451  | 9.153697185  |
| N400 | 0.119561608   | 6.683937439  | 6.915749820  |
| N401 | -1.026575853  | 8.829376552  | 4.348231415  |
| N402 | -2.283741722  | 8.142486763  | 1.995658136  |
| N403 | -4.158210368  | 6.869816510  | -2.547519034 |
| N404 | -4.808767188  | 9.098431434  | -2.851417164 |
| N405 | -6.392971280  | 7.473361804  | -2.381087072 |
| N406 | -2.906832676  | 5.342311558  | 2.195439660  |
| N407 | -4.712950710  | 5.340114409  | 4.345753914  |
| N408 | -6.929643444  | 6.957077770  | 4.100055372  |
| N409 | -6.259555676  | 9.026623865  | 0.690470155  |
| N410 | -9.590783027  | 6.467983469  | 3.439829261  |
| N411 | 9.927569175   | 4.407186103  | -5.105193659 |
| N412 | 6.504719831   | 4.030302669  | -3.997486223 |
| N413 | 3.875721173   | 5.453141856  | -3.390245256 |
| N414 | 4.147233788   | 7.309582507  | -1.231968315 |
| N415 | 4.878046063   | 4.335164760  | -8.429430851 |
| N416 | 2.062646856   | 4.254327029  | -7.878624220 |
| N417 | 12.295380864  | 0.657986142  | -0.657229927 |
| N418 | 8.065032348   | -0.199624527 | -1.763082840 |
| N419 | 9.009189827   | 0.308907956  | -3.686914860 |
| N420 | 12.053532817  | -1.258433745 | 1.811765805  |
| N421 | -1.314334098  | 1.406168178  | 1.050012484  |
| N422 | 2.004713330   | -0.184484764 | 1.324121059  |
| N423 | -0.203781577  | 1.566330227  | 0.962685090  |
| N424 | 1.822710737   | -1.339155255 | 0.689320535  |
| O425 | -2.111624292  | -6.127693308 | -5.488189005 |
| O426 | -5.164291517  | -6.607249301 | -3.500003841 |
| O427 | -3.340627249  | -9.388682349 | -1.695853996 |
| O428 | -1.337759076  | -6.838649065 | -0.259375876 |
| O429 | -3.943500802  | -4.889445733 | 1.015384557  |
| O430 | -5.342840659  | -7.616746980 | 2.759540516  |
| O431 | -2.023714880  | -9.610737895 | 4.014457844  |
| O432 | 1.152193584   | -6.237202108 | 3.818560560  |
| O433 | -1.721646438  | -3.792972749 | 5.491013826  |
| O434 | -4.655378612  | -5.094689029 | 7.181096061  |
| O435 | -3.971531513  | -8.334717926 | 8.461121836  |
| O436 | 10.206140452  | -7.200082384 | 2.299200598  |
| O437 | 7.768961299   | -7.678358455 | 6.247166947  |
| O438 | 8.693293873   | -3.821602785 | 9.183352835  |
| O439 | -3.341968801  | -1.790521201 | -4.293301498 |
| O440 | 1.843548056   | -1.106403143 | -6.631370327 |
| O441 | -6.163945786  | 0.572649477  | -4.325434216 |
| O442 | -4.721712111  | 3.124494565  | -5.358796467 |
| O443 | -8.490820954  | -2.475365494 | -4.914514279 |
| O444 | -6.465128059  | -3.176770871 | -0.722964595 |
| O445 | -7.423808446  | 0.264312212  | 1.124332997  |
| O446 | -11.013699392 | 0.130338495  | 1.366372721  |
| O447 | 5.687404623   | -0.593053015 | 10.025070969 |
| O448 | -2.032380216  | 1.398153675  | 6.624634667  |
| O449 | -2.289978546  | 7.167662562  | 5.267562416  |
| O450 | -3.917558148  | 9.736245290  | 2.290748793  |
| O451 | -4.642188378  | 5.809553770  | 0.782778115  |
| O452 | -5.686596341  | 3.454833638  | 3.470174905  |
| O453 | -2.375311570  | 3.615090109  | 4.767074018  |
| O454 | -7.408510190  | 6.775887046  | 6.334074174  |
| O455 | -10.141838028 | 8.669236376  | 3.668612885  |
| O456 | -8.275268272  | 7.996193349  | 1.009929788  |
| O457 | -13.142578382 | 6.192045439  | 3.861288782  |
| O458 | -7.304606815  | 4.570456869  | -2.102534247 |
| O459 | 7.602230711   | 3.049374602  | -5.760485702 |
| O460 | 3.901647503   | 5.263198991  | -5.674116856 |
| O461 | 2.812078834   | 8.786376256  | -2.327390920 |
| O462 | 5.093760725   | 10.519098037 | 0.091551871  |
| O463 | 1.894001926   | 3.072466882  | -9.820243092 |
| O464 | 5.503459809   | -0.923913101 | -7.137785669 |
| O465 | 6.587432949   | 0.601222763  | -5.923274516 |

|      |              |              |              |
|------|--------------|--------------|--------------|
| O466 | -0.523518298 | 6.589144295  | -7.079750844 |
| O467 | 11.604315316 | 0.803013591  | 2.640166407  |
| O468 | 13.678955148 | -0.771775277 | 4.972407465  |
| O469 | 4.445143661  | -3.512607076 | -2.862140276 |
| O470 | 3.990465113  | -5.680622998 | -2.476665221 |
| O471 | 11.405328657 | -4.325739398 | -2.488746080 |
| O472 | 9.862602147  | -4.898344103 | -4.040269671 |
| O473 | 7.561385239  | -2.118111242 | 0.562685758  |
| O474 | 7.859473679  | -4.325172436 | 0.854319928  |
| O475 | 6.235698438  | -2.361791600 | -1.665253632 |
| O476 | 9.614043241  | -3.442147485 | 4.463766835  |
| O477 | 7.347043324  | -1.999143946 | 3.436474092  |
| O478 | -4.813564435 | 4.090884166  | -2.796521199 |
| O479 | 12.581234398 | -4.030104700 | -0.009266925 |
| O480 | 10.355298042 | -4.442012731 | 1.990054305  |
| S481 | 0.422802161  | 5.840223055  | 2.896881102  |
| S482 | 1.516350153  | 3.958313815  | 0.234389480  |
| S483 | 4.709804369  | 0.360204350  | -1.879617606 |
| S484 | 1.508139122  | 2.112055334  | 3.246023646  |
| S485 | 1.635021149  | 0.787572144  | -1.247660515 |
| S486 | 5.380822182  | 4.084748722  | -0.807020444 |
| S487 | 4.696359546  | -1.546219600 | 1.165221224  |
| S488 | 4.059301566  | 4.540155058  | 2.653509601  |
| S489 | 7.046889852  | 1.199993980  | 0.842804043  |
| S490 | 4.983324830  | 0.962765603  | 3.936787545  |
| end  |              |              |              |

**Fe2-brNH-NH-Fe6**  
**2N2 dissociated**  
**35, S=3/2**

**Fe(139) -2.056**  
**Fe(140) 1.127**  
**Fe(141) -2.301**  
**Fe(142) 2.124**  
**Fe(143) 1.372**  
**Fe(144) 2.472**  
**Fe(145) 0.162**

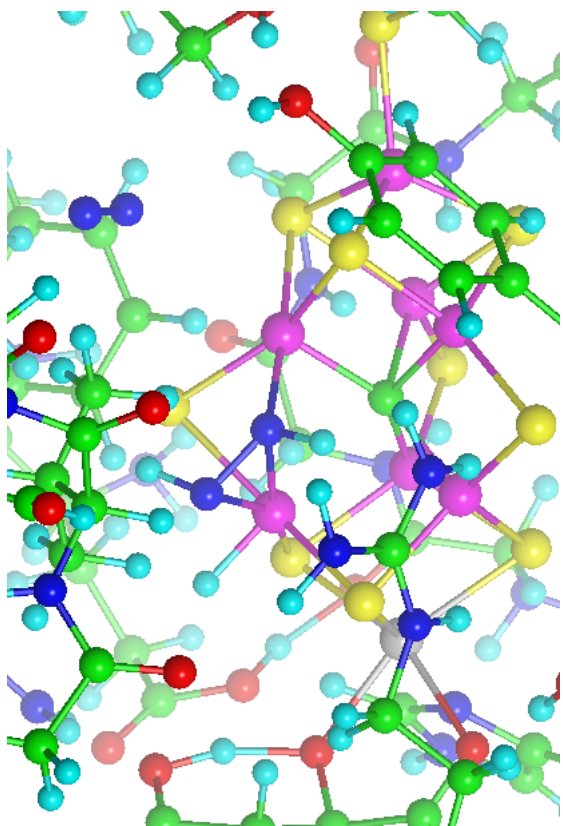

**bm526hx26n2h22n2xdtc.car\_4**

|     |              |               |              |
|-----|--------------|---------------|--------------|
| C1  | -7.726926474 | -5.334931881  | -1.185212515 |
| C2  | -7.809604727 | -6.356279643  | -2.325913102 |
| C3  | -8.935746243 | -3.600806222  | 0.067469311  |
| C4  | -8.641349169 | -4.038022602  | 1.500044750  |
| C5  | -8.661876402 | -5.848665509  | 3.146843375  |
| C6  | -7.164664034 | -5.978105465  | 3.446697326  |
| C7  | -4.906059460 | -6.171064223  | 2.534961758  |
| C8  | -4.397499929 | -4.768444829  | 2.878397708  |
| C9  | -4.619492758 | -2.363221282  | 2.447017808  |
| C10 | -4.967955411 | -1.944036641  | 3.883128054  |
| C11 | -6.517431838 | -2.011522199  | 5.731360033  |
| C12 | -5.687826383 | -2.696815072  | 6.826349176  |
| C13 | -4.902526889 | -4.832438880  | 7.739151264  |
| C14 | -3.380633442 | -5.035280251  | 7.745339208  |
| C15 | -1.357567473 | -5.484423024  | 6.415016657  |
| C16 | -0.503982735 | -4.282186483  | 6.005441982  |
| C17 | -0.594001831 | -1.939259863  | 5.196710704  |
| C18 | -0.707998866 | -0.820580025  | 6.245659282  |
| C19 | -1.109757889 | -1.568348151  | 3.790527798  |
| C20 | -0.477576945 | -0.261183460  | 3.306190174  |
| C21 | -0.862276263 | -2.717796907  | 2.810154139  |
| C22 | -2.179972967 | 0.725345090   | 7.463304621  |
| C23 | -2.169273057 | 0.193487260   | 8.910101487  |
| C24 | -3.457720456 | 1.526554627   | 7.118776524  |
| C25 | -3.761511067 | 2.568741111   | 8.201019279  |
| C26 | -3.316038900 | 2.198141553   | 5.746586821  |
| C27 | -3.010579422 | -1.398864238  | 10.535776245 |
| C28 | -1.642475572 | -1.710342833  | 11.108946869 |
| C29 | 4.972046231  | -12.073715211 | 3.574788982  |
| C30 | 5.717928710  | -10.760554232 | 3.363366556  |
| C31 | 5.872903514  | -8.429161707  | 4.219110660  |
| C32 | 6.858276117  | -8.166157894  | 5.372358839  |
| C33 | 4.665786062  | -7.479673946  | 4.295924900  |
| C34 | 5.072049085  | -6.012517169  | 4.187997069  |
| C35 | 3.870236709  | -5.089523989  | 4.003919549  |
| C36 | 3.969496235  | -2.599489470  | 4.286444702  |
| C37 | 9.019814372  | -7.183012148  | 5.978656603  |
| C38 | 9.196966701  | -5.691809375  | 6.160460154  |
| C39 | -4.750858671 | -2.376375446  | -3.092397313 |
| C40 | -5.239977107 | -1.003523378  | -2.595502818 |
| C41 | -3.269951056 | -2.544012558  | -2.683334856 |
| C42 | -2.697071209 | -3.968443733  | -2.822037323 |
| C43 | -2.094695715 | -4.308140984  | -4.185641138 |
| C44 | -5.528582090 | 1.332476800   | -3.328808200 |
| C45 | -6.818630405 | 1.690621255   | -2.578747150 |
| C46 | -5.392894292 | 2.098818462   | -4.651359752 |
| C47 | -9.154240228 | 1.094548680   | -2.131475622 |
| C48 | -9.113098942 | 0.928353049   | -0.608951518 |
| C49 | -7.850591238 | 0.151766754   | 1.343852427  |
| C50 | -6.749934555 | 1.035285040   | 1.932967545  |
| C51 | -5.073228490 | 2.782382957   | 1.571406134  |
| C52 | -5.657002442 | 4.028793603   | 2.286628352  |
| C53 | -4.193065422 | 3.324863039   | 0.436064621  |
| C54 | -3.353928172 | 2.356200020   | -0.336032476 |

|      |               |              |              |
|------|---------------|--------------|--------------|
| C55  | -2.889101515  | 1.079552781  | -0.125336788 |
| C56  | -1.977326722  | 1.814309482  | -2.013444835 |
| C57  | -7.468471885  | 5.706856282  | 2.229129768  |
| C58  | -7.693304420  | 5.702611369  | 3.739218337  |
| C59  | -8.809719633  | 5.849447664  | 1.472876487  |
| C60  | -9.389474965  | 7.231123055  | 1.384389784  |
| C61  | -9.531933412  | 8.216621470  | 2.341411955  |
| C62  | -10.382075231 | 8.889919180  | 0.409201291  |
| C63  | 8.195966279   | 1.099586437  | 5.647824573  |
| C64  | 9.250513693   | 0.010666284  | 5.563912879  |
| C65  | 6.891085038   | 0.506940930  | 5.060789960  |
| C66  | 5.724577950   | 1.464951204  | 5.112210242  |
| C67  | 4.866675663   | 1.514214110  | 6.225925436  |
| C68  | 5.463134754   | 2.337828456  | 4.041609503  |
| C69  | 3.778849060   | 2.393801418  | 6.269491417  |
| C70  | 4.392034041   | 3.231755870  | 4.076833381  |
| C71  | 3.546548814   | 3.255012925  | 5.189478413  |
| C72  | 5.495073559   | 6.910978192  | 0.665003927  |
| C73  | 4.496567511   | 8.038707536  | 0.353026230  |
| C74  | 4.784451278   | 5.557251025  | 0.678343533  |
| C75  | 3.854716523   | 9.812194213  | -1.241853587 |
| C76  | 2.467452885   | 9.473798124  | -1.793849658 |
| C77  | 0.909232580   | 7.600997844  | -2.331180598 |
| C78  | 0.133061960   | 7.083718768  | -1.091488572 |
| C79  | 1.172125054   | 6.487359819  | -3.370344707 |
| C80  | -0.001000555  | 5.634596414  | -3.865840756 |
| C81  | -0.934960321  | 6.270281071  | -4.907244074 |
| C82  | -2.552099905  | 8.140848723  | -4.564559050 |
| C83  | 0.183434279   | 5.902275963  | 1.056631770  |
| C84  | -0.244995540  | 7.003143599  | 2.035993244  |
| C85  | 1.064259229   | 4.901878634  | 1.841706461  |
| C86  | 0.572751843   | 8.949127865  | 3.271916446  |
| C87  | 0.017523119   | 10.332896664 | 2.978383617  |
| C88  | -0.992158447  | 11.790570958 | 1.304922071  |
| C89  | -2.397121827  | 12.283799872 | 1.730647272  |
| C90  | -0.783959319  | 11.972749969 | -0.200205450 |
| C91  | -1.770117989  | 11.199938935 | -1.066993349 |
| C92  | -4.612528434  | 11.664070563 | 2.580672349  |
| C93  | -4.779793856  | 12.638221241 | 3.739629727  |
| C94  | -5.364750198  | 10.336427305 | 2.879598009  |
| C95  | -5.341254671  | 9.394194011  | 1.696058604  |
| C96  | -6.313043198  | 9.502217683  | 0.689539218  |
| C97  | -4.329007572  | 8.434154841  | 1.536318478  |
| C98  | -6.266192365  | 8.701004829  | -0.452503500 |
| C99  | -4.250687325  | 7.639966835  | 0.388050775  |
| C100 | -5.220726790  | 7.788031090  | -0.598087825 |
| C101 | 6.131788891   | -2.983093884 | -8.203290722 |
| C102 | 4.636699457   | -2.766235083 | -8.053968097 |
| C103 | 2.901398459   | -1.344841339 | -6.981270185 |
| C104 | 2.533211621   | 0.061029795  | -7.473365747 |
| C105 | 2.878293873   | 2.465073753  | -7.076990445 |
| C106 | 4.056335697   | 3.411321115  | -6.855551187 |
| C107 | 6.170389792   | 3.928340761  | -5.772469617 |
| C108 | 6.986794584   | 4.327005127  | -6.986085725 |
| C109 | -0.476227173  | -2.386369742 | -9.882843664 |
| C110 | -1.553850247  | -1.317207584 | -9.674022754 |
| C111 | -0.303053279  | -3.214173226 | -8.588450965 |
| C112 | 0.477715541   | -4.513929483 | -8.857561746 |
| C113 | 0.847373006   | -5.187951378 | -7.556380492 |
| C114 | -2.112879920  | 0.924188294  | -8.891259930 |
| C115 | -1.503903612  | 2.260068119  | -9.264942451 |
| C116 | -2.855848340  | 0.901339306  | -7.533296471 |
| C117 | -1.864045950  | 0.831342864  | -6.410367659 |
| C118 | -1.241779367  | 1.997635426  | -5.936596112 |
| C119 | -1.401880294  | -0.418548843 | -5.961413855 |
| C120 | -0.119021020  | 1.908580471  | -5.107507532 |
| C121 | -0.289514658  | -0.503806589 | -5.124821482 |
| C122 | 0.381081613   | 0.659466263  | -4.732047565 |
| C123 | 8.859504223   | -5.803509572 | -3.502442493 |
| C124 | 9.794127541   | -6.014647923 | -2.298407749 |
| C125 | 7.414401956   | -6.160676237 | -3.127465313 |
| C126 | 6.356827133   | -5.835417721 | -4.135001412 |
| C127 | 6.280627625   | -6.257912867 | -5.446230071 |
| C128 | 4.386320786   | -5.252624476 | -4.894206735 |
| C129 | 10.607806608  | -7.434525319 | -0.509560979 |
| C130 | 12.061257506  | -7.132989064 | -0.799274403 |
| C131 | 0.703955748   | -6.834309949 | -0.737533691 |
| C132 | 2.096220435   | -6.924509372 | -0.118006599 |
| C133 | 3.259016607   | -6.911302805 | -1.154184178 |
| C134 | 3.310649790   | -8.270821258 | -1.906169787 |
| C135 | 4.577475274   | -8.521585134 | -2.729056373 |
| C136 | 4.703403388   | -9.955501613 | -3.289831694 |

|       |              |              |               |
|-------|--------------|--------------|---------------|
| C137  | 4.596983738  | -6.725323851 | -0.422041570  |
| C138  | 4.049971889  | -0.480533730 | -1.402200317  |
| Fe139 | 4.469678780  | -1.593262207 | -2.919441620  |
| Fe140 | 2.489053422  | 0.490810815  | -0.863691813  |
| Fe141 | 5.050394078  | 0.627026622  | -0.106823125  |
| Fe142 | 4.492310201  | 0.964216037  | -2.617680852  |
| Fe143 | 4.134086272  | 2.942331177  | -0.927724260  |
| Fe144 | 5.132226076  | -1.908242529 | -0.478480555  |
| Fe145 | 2.364036594  | -2.172824638 | -1.027326624  |
| H146  | -6.086645975 | -7.380765399 | -1.938099890  |
| H147  | -5.921384784 | -6.247731860 | -3.100656891  |
| H148  | -9.682917258 | -4.794945595 | -1.539061180  |
| H149  | -8.292086531 | -5.877324161 | -3.193828891  |
| H150  | -8.502678878 | -7.148169550 | -1.994705304  |
| H151  | -8.211093486 | -2.809317357 | -0.174128861  |
| H152  | -9.374014221 | -5.912919881 | 1.118993481   |
| H153  | -9.938080996 | -3.154389214 | 0.045383087   |
| H154  | -9.129654186 | -6.838744346 | 3.236459647   |
| H155  | -6.735086873 | -6.153847334 | 1.440570299   |
| H156  | -9.083803443 | -5.200067673 | 3.925376054   |
| H157  | -3.549806742 | -2.164395904 | 2.308305858   |
| H158  | -5.580280187 | -3.968126900 | 1.395174394   |
| H159  | -4.447958759 | -6.512282233 | 1.596178317   |
| H160  | -6.395680403 | -0.929163972 | 5.866619160   |
| H161  | -6.816881689 | -2.859164585 | 3.767611032   |
| H162  | -4.586125946 | -6.839130074 | 3.343216166   |
| H163  | -5.177689595 | -1.737607941 | 1.737045743   |
| H164  | -5.879204682 | -4.508628262 | 5.859987124   |
| H165  | -7.575179005 | -2.268279645 | 5.883247198   |
| H166  | -1.338325205 | -3.648161427 | 3.147548619   |
| H167  | -1.285178224 | -2.474723646 | 1.821998798   |
| H168  | 0.211930013  | -2.890598385 | 2.657291887   |
| H169  | -2.193980082 | -1.404880592 | 3.873024246   |
| H170  | -5.372487860 | -5.826412487 | 7.709227910   |
| H171  | -3.169605353 | 1.468256225  | 4.938378609   |
| H172  | -3.586319767 | -1.278937512 | 8.484927774   |
| H173  | -3.939958365 | 2.109256903  | 9.184185172   |
| H174  | 0.608483296  | -0.359211375 | 3.158608020   |
| H175  | -0.658359629 | 0.570522927  | 4.003954075   |
| H176  | 8.022617791  | 1.315728122  | 6.719364792   |
| H177  | -4.218684619 | 2.778243129  | 5.506815140   |
| H178  | -4.658039834 | 3.142431580  | 7.925342917   |
| H179  | -2.458631712 | 2.890820248  | 5.745431240   |
| H180  | -2.924675283 | 3.277467279  | 8.307588792   |
| H181  | -4.301626997 | 0.813919936  | 7.076531266   |
| H182  | -1.312845330 | 1.401635451  | 7.417795611   |
| H183  | -2.747104997 | -0.661350945 | 5.920531402   |
| H184  | -0.914130688 | 0.027914342  | 2.339860744   |
| H185  | 1.565285238  | 4.232026616  | 1.122725270   |
| H186  | 0.386915828  | 4.299877848  | 2.463996924   |
| H187  | 2.079387536  | 5.085768453  | 3.512173704   |
| H188  | 1.948912290  | 4.041555322  | 5.966656964   |
| H189  | 4.195406216  | 3.896664220  | 3.235547640   |
| H190  | 6.092992279  | 2.303104054  | 3.149836893   |
| H191  | 5.038350732  | 0.842544939  | 7.071486192   |
| H192  | -2.215173545 | -3.240547002 | 5.692802054   |
| H193  | -1.182578934 | -6.276229769 | 5.671878558   |
| H194  | -0.982888732 | -5.839779504 | 7.383674705   |
| H195  | -3.334561103 | -5.211249821 | 5.668460468   |
| H196  | -5.149541746 | -4.364236575 | 8.699404542   |
| H197  | 3.110412856  | 2.402807262  | 7.134599224   |
| H198  | 0.480512794  | -2.143681646 | 5.126046859   |
| H199  | -3.529885133 | -0.705933269 | 11.216729956  |
| H200  | -3.575749677 | -2.343049626 | 10.513853238  |
| H201  | -0.856493996 | -1.953197732 | 10.357369798  |
| H202  | 9.990406498  | -7.636257100 | 5.722159807   |
| H203  | -0.654466631 | -5.470912232 | -5.063722260  |
| H204  | 1.637457455  | -5.793967164 | -2.059709924  |
| H205  | -0.153097875 | -5.204802698 | -9.434998364  |
| H206  | 1.381322059  | -4.297527273 | -9.445869416  |
| H207  | -1.287020596 | -3.467895157 | -8.164219012  |
| H208  | -0.665515504 | 2.195776417  | -9.998184599  |
| H209  | -0.919793998 | -3.052041553 | -10.640413419 |
| H210  | -2.658505513 | -1.837766414 | -3.268468194  |
| H211  | -3.486227156 | -4.714601164 | -2.624901581  |
| H212  | -0.179790202 | -0.014142280 | -8.816429708  |
| H213  | -2.884611921 | 0.766405628  | -9.673519369  |
| H214  | 1.291490593  | -1.295687200 | -9.777972949  |
| H215  | -0.654586164 | -5.527642107 | -3.303576338  |
| H216  | 0.211643149  | -2.597895382 | -7.834253810  |
| H217  | 1.335856260  | -2.562642518 | -10.832097274 |
| H218  | -5.797258778 | -2.989966886 | -4.764537346  |

|      |               |              |              |
|------|---------------|--------------|--------------|
| H219 | -3.188911394  | -2.248773631 | -1.627087871 |
| H220 | 2.634938802   | -4.389266882 | -7.719448787 |
| H221 | -1.935165103  | -4.129183976 | -2.045503081 |
| H222 | -4.468997820  | 2.261834516  | 2.328088490  |
| H223 | -3.081294531  | 0.380816530  | 0.680144311  |
| H224 | -8.790666691  | 0.445309986  | 1.832424186  |
| H225 | -7.303164271  | -0.090757239 | -0.704119183 |
| H226 | -7.358022971  | 3.856704841  | 1.152447354  |
| H227 | -9.225581936  | 8.275473159  | 3.379214258  |
| H228 | -7.947761878  | 4.697718273  | 4.155888491  |
| H229 | -9.541146327  | 5.144328389  | 1.905627243  |
| H230 | -6.796087702  | 6.543061865  | 1.980182247  |
| H231 | -10.873088292 | 9.535594056  | -0.315083134 |
| H232 | -3.521731418  | 4.072189629  | 0.891017755  |
| H233 | -4.833881557  | 3.867570586  | -0.277552382 |
| H234 | -10.412497622 | 10.153912047 | 2.121799114  |
| H235 | -8.639792524  | 5.519586137  | 0.435778022  |
| H236 | -6.369551832  | 1.925399472  | 0.0888468120 |
| H237 | -7.647768207  | -0.888149326 | 1.639889700  |
| H238 | -9.543171129  | 2.105118062  | -2.319162054 |
| H239 | -1.386264117  | 1.852308775  | -2.924927079 |
| H240 | -9.879238788  | 0.377369972  | -2.536993515 |
| H241 | 9.382150397   | 2.747905878  | 5.371043759  |
| H242 | 7.874657551   | 2.917916781  | 4.764426369  |
| H243 | 1.815670662   | 6.102690604  | -0.335147408 |
| H244 | -0.742051052  | 5.388751602  | 0.754849662  |
| H245 | 1.523611339   | 7.967013123  | 1.657966720  |
| H246 | -2.999230856  | 3.691429689  | -1.995554622 |
| H247 | -4.354791652  | 4.531309601  | -3.415428334 |
| H248 | -5.567940443  | 3.964541317  | -5.233156158 |
| H249 | -4.279191005  | 5.636956369  | -2.272864231 |
| H250 | -4.447545102  | 1.793774048  | -5.129966124 |
| H251 | -6.229358991  | 1.845414097  | -5.321396547 |
| H252 | 0.257241113   | 11.735892696 | -0.460973349 |
| H253 | -0.941293181  | 13.040097450 | -0.422082633 |
| H254 | -0.224097770  | 10.545420002 | -2.284657259 |
| H255 | -1.858632582  | 10.045908892 | -2.717465587 |
| H256 | -2.338316459  | 9.856339731  | -5.665247711 |
| H257 | -1.289107133  | 5.496818692  | -5.605758042 |
| H258 | -7.038366968  | 8.788188243  | -1.220710159 |
| H259 | -3.577943615  | 8.280763354  | 2.316077708  |
| H260 | -3.933164868  | 8.130206177  | -3.032408169 |
| H261 | 1.910819926   | 5.800755068  | -2.926514275 |
| H262 | 2.953449432   | 7.497054760  | -1.742275654 |
| H263 | -0.593341916  | 5.245493542  | -3.022584859 |
| H264 | -7.767488509  | 0.097280105  | -3.433249413 |
| H265 | 4.389726046   | 10.387793539 | -2.009165100 |
| H266 | -5.166387653  | -0.489875851 | -4.520455289 |
| H267 | 1.670623276   | 6.955570564  | -4.235360020 |
| H268 | -3.421119996  | 6.943936543  | 0.256083419  |
| H269 | 3.686797000   | 10.476446413 | -0.381712336 |
| H270 | -1.476253630  | 8.492445476  | -6.285194295 |
| H271 | -4.090899813  | 9.431757403  | -4.166964829 |
| H272 | -4.136041845  | -2.997446183 | -4.957727508 |
| H273 | -5.340296844  | -3.120585185 | -2.524745899 |
| H274 | -7.127992764  | 10.221937897 | 0.798257946  |
| H275 | -4.725638122  | 1.660120143  | -2.653435533 |
| H276 | 0.295881112   | 8.403419219  | -2.753441488 |
| H277 | -0.377915717  | 7.004756906  | -5.503007859 |
| H278 | 0.451817817   | 4.758291299  | -4.348037363 |
| H279 | -2.690964471  | 6.303443531  | -3.700031336 |
| H280 | -0.051250966  | 8.496117024  | 4.057369095  |
| H281 | -0.574350696  | 9.686122974  | 1.131731922  |
| H282 | -0.314497206  | 12.495449063 | 1.812236609  |
| H283 | 1.585209995   | 9.083785982  | 3.675707198  |
| H284 | -2.902527292  | 10.409824250 | 2.317072587  |
| H285 | 6.656703775   | -2.018039902 | -8.151168176 |
| H286 | 6.439244668   | -3.563992676 | -7.308979852 |
| H287 | 8.918377438   | -4.727077987 | -3.721765795 |
| H288 | 7.391785205   | -3.973676539 | -9.461470394 |
| H289 | 5.834454385   | -4.468870436 | -9.560419123 |
| H290 | 5.530510971   | 4.780263670  | 0.889018146  |
| H291 | 5.407959707   | 7.256746662  | 2.677262809  |
| H292 | 5.442927535   | 8.398621532  | -1.438647322 |
| H293 | 4.021602534   | 5.556055985  | 1.468944417  |
| H294 | 6.685583754   | 7.978973542  | 1.956327040  |
| H295 | 6.851869837   | 3.430050007  | -5.065407737 |
| H296 | 6.286469157   | 6.895976924  | -0.100454164 |
| H297 | 4.121365754   | -7.664587673 | 5.236864030  |
| H298 | 6.379800035   | -8.286631245 | 3.256307273  |
| H299 | 5.114576996   | 2.077308946  | -5.646133319 |
| H300 | 4.164532400   | -0.558432685 | 4.241947952  |



|       |              |               |              |
|-------|--------------|---------------|--------------|
| H301  | 2.590758896  | 2.533423568   | -8.133284630 |
| H302  | 0.067219783  | -1.474851449  | -4.774649152 |
| H303  | 2.036145125  | 2.872727274   | -6.491429129 |
| H304  | 3.253776800  | -5.071987986  | 4.910037491  |
| H305  | 3.542875513  | 0.796930427   | -5.869315251 |
| H306  | 3.232743543  | -5.445104844  | 3.178299519  |
| H307  | 3.993918517  | -7.742839643  | 3.463372930  |
| H308  | 5.740398398  | -5.882533390  | 3.323834936  |
| H309  | 5.632297968  | -5.692107147  | 5.080600749  |
| H310  | -3.522360986 | 0.026965072   | -7.531920487 |
| H311  | 4.753282454  | -10.106383331 | 4.987857859  |
| H312  | 4.221230559  | -12.123433293 | 2.771481754  |
| H313  | 1.260996182  | 0.587309281   | -4.095503211 |
| H314  | 4.914179084  | -12.572007316 | 5.571754610  |
| H315  | 3.478595871  | -12.768553336 | 4.808680177  |
| H316  | 5.000802681  | -3.675268508  | 2.915865770  |
| H317  | 0.386074578  | 2.811287817   | -4.758944506 |
| H318  | -1.904476584 | -1.333334877  | -6.285414962 |
| H319  | 7.928130082  | -9.803476923  | -0.974534705 |
| H320  | 7.359383850  | -7.244777266  | -2.927079437 |
| H321  | 6.573597441  | -8.205495011  | 0.498528305  |
| H322  | 7.349155247  | -10.244740298 | -2.347145894 |
| H323  | 6.932846710  | 3.614942341   | -7.844748121 |
| H324  | 6.317296961  | -5.077831648  | 0.687010979  |
| H325  | 2.144244007  | -7.815016548  | 0.519777469  |
| H326  | 5.006826310  | -1.145636640  | -6.866322035 |
| H327  | 3.221584536  | -9.058455994  | -1.142377117 |
| H328  | 4.641440595  | -6.089115804  | -6.813771792 |
| H329  | 3.371494025  | -4.886706698  | -4.981405476 |
| H330  | 5.692528804  | -12.886770900 | 3.384962193  |
| H331  | 5.143933673  | -1.386325616  | 3.069072490  |
| H332  | 8.020884092  | -5.987230386  | 2.054658554  |
| H333  | 7.147816180  | -3.847856124  | 1.138205830  |
| H334  | 8.166709141  | -7.281654598  | 4.009167025  |
| H335  | 2.410917848  | -3.346051182  | 5.467338767  |
| H336  | 4.599273454  | -7.830503898  | -3.585411142 |
| H337  | 5.472659651  | -8.314667867  | -2.126610483 |
| H338  | 2.421033043  | -8.347298649  | -2.550253454 |
| H339  | 2.768101219  | -1.418936870  | -5.890239166 |
| H340  | -1.609418809 | 2.971101558   | -6.268727881 |
| H341  | -3.474082042 | 1.810174804   | -7.486593811 |
| H342  | 2.193292910  | -6.039578534  | 0.534838919  |
| H343  | 8.227571715  | -7.490004713  | 1.705876213  |
| H344  | 7.151668704  | -9.393804049  | 1.300371355  |
| H345  | 2.830259066  | -1.693828357  | 5.719705112  |
| H346  | 6.988851073  | -6.805654821  | -6.056021735 |
| H347  | 7.161272014  | -5.670294144  | -2.180686103 |
| H348  | 2.242492672  | -2.062158593  | -7.475358945 |
| H349  | 5.786196029  | 4.837503365   | -5.284605454 |
| H350  | 6.651722685  | -0.405014090  | 5.626150969  |
| H351  | 7.084719511  | 0.213992952   | 4.016427621  |
| H352  | 10.272395521 | -6.237014271  | -4.924504554 |
| H353  | 9.359096210  | -7.530712875  | -4.513970768 |
| H354  | 10.542522010 | -8.499864991  | -0.238146566 |
| H355  | 9.133127253  | -7.980311546  | -1.951196241 |
| H356  | 12.361070658 | -7.256294670  | -1.867576370 |
| H357  | 10.273050829 | -6.847085261  | 0.360358940  |
| H358  | 9.739955194  | -0.074747239  | 4.563101370  |
| H359  | -3.907169185 | 12.697744460  | 4.432388031  |
| H360  | 8.700919587  | -7.595069017  | 6.952948037  |
| H361  | 8.302274541  | -5.071273384  | 5.906926356  |
| H362  | -5.056718526 | 12.134022929  | 1.686871116  |
| H363  | -4.912015156 | 9.860736053   | 3.763755994  |
| H364  | -6.400122193 | 10.597661331  | 3.140837163  |
| H365  | 1.350197580  | -3.260800797  | -1.059551424 |
| H366  | 3.020006754  | -1.079901220  | 1.153676126  |
| H367  | -5.957819568 | 7.042912115   | -2.242630359 |
| H368  | 0.444967902  | -1.514512931  | 0.226709830  |
| H369  | -1.353200647 | -0.010791423  | -1.240125244 |
| Mo370 | 4.305683075  | -4.103912175  | -1.886349891 |
| N371  | -6.558645575 | -6.963562104  | -2.744138345 |
| N372  | -8.889762961 | -4.673690676  | -0.913676390 |
| N373  | -8.961459007 | -5.312662025  | 1.828751599  |
| N374  | -6.353496596 | -6.213773731  | 2.385029888  |
| N375  | -4.926742243 | -3.754416752  | 2.147460009  |
| N376  | -6.141781934 | -2.396679305  | 4.381976344  |
| N377  | -5.467342538 | -4.027846449  | 6.664300570  |
| N378  | -2.783680560 | -5.227267756  | 6.532909606  |
| N379  | -1.199243815 | -3.164801761  | 5.695617538  |
| N380  | -1.958551839 | -0.343752642  | 6.489984740  |
| N381  | -2.938221124 | -0.893353060  | 9.176098075  |
| N382  | 4.292808158  | -12.156048863 | 4.874638101  |

|      |               |               |               |
|------|---------------|---------------|---------------|
| N383 | 5.410391707   | -9.804842805  | 4.260631747   |
| N384 | 4.329018283   | -3.736496800  | 3.685631706   |
| N385 | 3.078719778   | -2.585580521  | 5.300212513   |
| N386 | 4.534366298   | -1.440567447  | 3.899985393   |
| N387 | 7.997617550   | -7.524282263  | 5.009901418   |
| N388 | -4.936684954  | -2.484661756  | -4.544663676  |
| N389 | -1.078445718  | -5.190835535  | -4.172922557  |
| N390 | -5.386648879  | -0.089398721  | -3.592533137  |
| N391 | -7.889047179  | 0.899136759   | -2.818353387  |
| N392 | -8.049472382  | 0.252888746   | -0.090034132  |
| N393 | -6.094076585  | 1.873131830   | 1.073484889   |
| N394 | -2.770913355  | 2.779685746   | -1.525240972  |
| N395 | -2.047610946  | 0.771504022   | -1.178062847  |
| N396 | -6.867960107  | 4.438178076   | 1.827774276   |
| N397 | -9.925003527  | 7.664875143   | 0.181314817   |
| N398 | -10.162052481 | 9.263134376   | 1.701100549   |
| N399 | 8.645730577   | 2.251653894   | 4.863007624   |
| N400 | 6.139030724   | 7.113104607   | 1.972877780   |
| N401 | 4.674403764   | 8.684333178   | -0.837420805  |
| N402 | 2.205162682   | 8.161132447   | -1.965327003  |
| N403 | -2.110944727  | 6.910262275   | -4.308231910  |
| N404 | -2.000926984  | 8.909311973   | -5.524254353  |
| N405 | -3.518239286  | 8.681588816   | -3.788323499  |
| N406 | 0.849713789   | 6.417992905   | -0.141086283  |
| N407 | 0.619097494   | 8.053595904   | 2.130669898   |
| N408 | -0.631229371  | 10.469306342  | 1.781929553   |
| N409 | -1.240829784  | 10.672988411  | -2.205652301  |
| N410 | -3.203042845  | 11.380885204  | 2.342969910   |
| N411 | 6.426615776   | -3.637401687  | -9.479256530  |
| N412 | 4.274217993   | -1.686041331  | -7.329148305  |
| N413 | 3.084443618   | 1.064581098   | -6.756156745  |
| N414 | 5.102645395   | 2.996129509   | -6.096864319  |
| N415 | 0.740194321   | -1.813965101  | -10.472550120 |
| N416 | -1.156910318  | -0.147023773  | -9.095360918  |
| N417 | 9.314633068   | -6.524838983  | -4.704474613  |
| N418 | 5.161569706   | -5.193607156  | -3.811551393  |
| N419 | 5.037258807   | -5.879330985  | -5.901515181  |
| N420 | 9.765229003   | -7.223471748  | -1.675207400  |
| N421 | -0.534817369  | 2.352243373   | 1.132931871   |
| N422 | 2.217377121   | -0.902448307  | 0.531611977   |
| N423 | 0.113060533   | 2.378657994   | 0.231256713   |
| N424 | 1.301852118   | -1.865080335  | 0.695925259   |
| O425 | -6.698978598  | -5.145276110  | -0.510987098  |
| O426 | -8.132526197  | -3.241847548  | 2.307635154   |
| O427 | -6.746487076  | -5.885888716  | 4.612702312   |
| O428 | -3.571095653  | -4.576738285  | 3.783491718   |
| O429 | -4.203828467  | -1.223972362  | 4.544418732   |
| O430 | -5.296469037  | -2.059508224  | 7.819503129   |
| O431 | -2.765111799  | -5.065354909  | 8.819055751   |
| O432 | 0.737041571   | -4.386450104  | 5.960485155   |
| O433 | 0.303693230   | -0.403565762  | 6.832571338   |
| O434 | -1.486028105  | 0.740321155   | 9.792212855   |
| O435 | -1.418707812  | -1.761027181  | 12.309307102  |
| O436 | 6.508543100   | -10.636989294 | 2.405134111   |
| O437 | 6.585615926   | -8.507676198  | 6.536148849   |
| O438 | 10.228335375  | -5.181255336  | 6.568585344   |
| O439 | -5.462181150  | -0.749562180  | -1.396137801  |
| O440 | -2.539595517  | -3.819172929  | -5.249337153  |
| O441 | -6.845306053  | 2.648096029   | -1.785109099  |
| O442 | -5.392910302  | 3.516355737   | -4.386589875  |
| O443 | -10.036289624 | 1.391339366   | 0.074909054   |
| O444 | -6.492213987  | 0.977722032   | 3.139580604   |
| O445 | -5.008616114  | 4.642157382   | 3.138872511   |
| O446 | -7.646907664  | 6.694647849   | 4.445246753   |
| O447 | 9.547173666   | -0.735937619  | 6.485412251   |
| O448 | 2.487422645   | 4.141888405   | 5.160090356   |
| O449 | 3.586266051   | 8.354623086   | 1.138434245   |
| O450 | 1.672473885   | 10.397748521  | -2.054919562  |
| O451 | -1.087465784  | 7.285666551   | -0.996350392  |
| O452 | -1.264918647  | 6.881618621   | 2.725707980   |
| O453 | 2.031341144   | 5.562278838   | 2.657498447   |
| O454 | 0.141765624   | 11.255920263  | 3.792119643   |
| O455 | -2.720487928  | 13.468500219  | 1.563498344   |
| O456 | -2.973176318  | 11.117939848  | -0.782576167  |
| O457 | -5.795960203  | 13.289027293  | 3.924880782   |
| O458 | -5.099609432  | 7.021263611   | -1.776108234  |
| O459 | 3.818659287   | -3.575881400  | -8.552533728  |
| O460 | 1.806747961   | 0.240910438   | -8.471639789  |
| O461 | 4.009529168   | 4.554256135   | -7.339492550  |
| O462 | 7.687490820   | 5.324606276   | -7.025106828  |
| O463 | -2.736082308  | -1.522652087  | -9.995046013  |
| O464 | 0.067924008   | -5.877855246  | -6.907543412  |

|                                                                                     |                                   |              |               |              |
|-------------------------------------------------------------------------------------|-----------------------------------|--------------|---------------|--------------|
|                                                                                     | O465                              | 2.090640637  | -4.953591428  | -7.087973402 |
|                                                                                     | O466                              | -1.909493281 | 3.341955977   | -8.864821716 |
|                                                                                     | O467                              | 10.584901171 | -5.125462743  | -1.925452899 |
|                                                                                     | O468                              | 12.881644009 | -6.853709652  | 0.064127458  |
|                                                                                     | O469                              | 0.620981762  | -6.070506312  | -1.835459976 |
|                                                                                     | O470                              | -0.284955768 | -7.371184163  | -0.242670088 |
|                                                                                     | O471                              | 5.868381597  | -10.487300044 | -3.262602886 |
|                                                                                     | O472                              | 3.663432995  | -10.492072124 | -3.765813502 |
|                                                                                     | O473                              | 5.334753843  | -5.711172212  | -0.799243552 |
|                                                                                     | O474                              | 4.949675687  | -7.530661037  | 0.459399779  |
|                                                                                     | O475                              | 3.039697180  | -5.807921702  | -2.035758980 |
|                                                                                     | O476                              | 8.544366588  | -6.778633339  | 2.329080618  |
|                                                                                     | O477                              | 6.765457321  | -4.679670629  | 1.476391060  |
|                                                                                     | O478                              | -3.725847960 | 5.049324773   | -2.844348282 |
|                                                                                     | O479                              | 8.207302135  | -10.200117673 | -1.829626818 |
|                                                                                     | O480                              | 7.427799296  | -8.685005255  | 0.663962593  |
|                                                                                     | S481                              | 3.936955789  | 5.146588421   | -0.915328354 |
|                                                                                     | S482                              | 2.672142614  | 2.203143894   | -2.375324009 |
|                                                                                     | S483                              | 2.677331841  | -2.921538501  | -3.142134661 |
|                                                                                     | S484                              | 3.421785886  | 1.784730990   | 0.826288346  |
|                                                                                     | S485                              | 0.827986421  | -0.625459543  | -1.864014887 |
|                                                                                     | S486                              | 5.063566102  | -0.086630348  | -4.447541511 |
|                                                                                     | S487                              | 3.676650843  | -3.488356021  | 0.266196809  |
|                                                                                     | S488                              | 6.059629972  | 2.093871049   | -1.504486344 |
|                                                                                     | S489                              | 6.253224066  | -2.761823910  | -2.194768507 |
|                                                                                     | S490                              | 6.225391731  | -0.816730289  | 1.072398942  |
|                                                                                     | end                               |              |               |              |
| <b>Fe2-brNH-NH-Fe6</b><br><b>2N2 TS</b><br><b>35, S=3/2</b>                         |                                   |              |               |              |
| <b>Fe( 139) -2.472</b>                                                              |                                   |              |               |              |
| <b>Fe( 140) 0.952</b>                                                               |                                   |              |               |              |
| <b>Fe( 141) -2.261</b>                                                              |                                   |              |               |              |
| <b>Fe( 142) 2.624</b>                                                               |                                   |              |               |              |
| <b>Fe( 143) 1.584</b>                                                               |                                   |              |               |              |
| <b>Fe( 144) 2.163</b>                                                               |                                   |              |               |              |
| <b>Fe( 145) 0.161</b>                                                               |                                   |              |               |              |
| 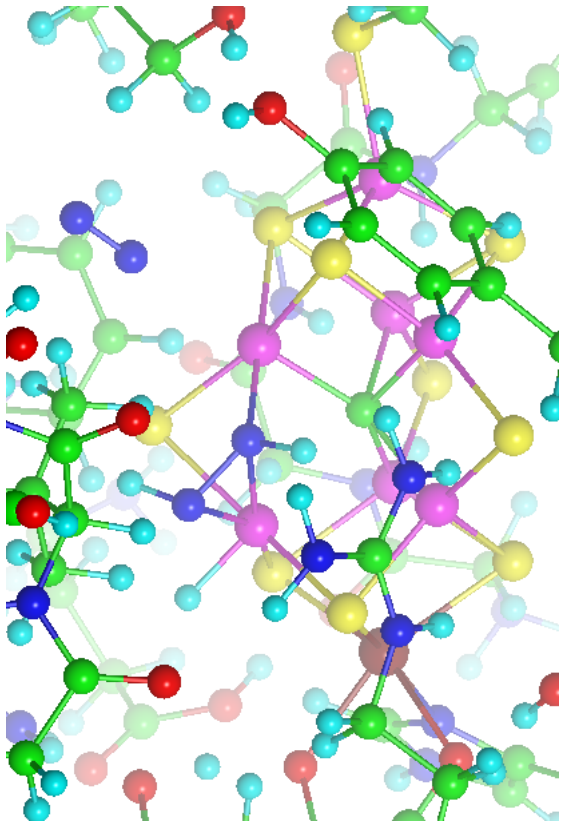 |                                   |              |               |              |
|                                                                                     | <b>bm526hx26n2h22n2xdtg.car_1</b> |              |               |              |
|                                                                                     | C1                                | -2.556508708 | -6.249286437  | -6.642495357 |
|                                                                                     | C2                                | -1.704020009 | -6.482747317  | -7.896696336 |
|                                                                                     | C3                                | -4.841558978 | -5.979784269  | -5.774679793 |
|                                                                                     | C4                                | -4.815802994 | -6.958859723  | -4.604930353 |
|                                                                                     | C5                                | -4.328534995 | -9.225989509  | -3.826928811 |
|                                                                                     | C6                                | -3.196318083 | -8.947821349  | -2.833607249 |
|                                                                                     | C7                                | -1.076685456 | -7.818915467  | -2.399343870 |
|                                                                                     | C8                                | -1.590274256 | -6.730856829  | -1.452986638 |
|                                                                                     | C9                                | -2.979522358 | -4.716523878  | -1.238464044 |
|                                                                                     | C10                               | -3.938268253 | -5.253471436  | -0.166193595 |
|                                                                                     | C11                               | -5.659546835 | -6.822852825  | 0.462098759  |
|                                                                                     | C12                               | -4.985971937 | -7.635030928  | 1.577460312  |
|                                                                                     | C13                               | -3.477589915 | -9.494482870  | 2.102677209  |
|                                                                                     | C14                               | -2.189445095 | -9.136416743  | 2.858070098  |
|                                                                                     | C15                               | 0.045055537  | -8.105784379  | 2.744409147  |
|                                                                                     | C16                               | 0.151494826  | -6.658643575  | 3.235368639  |
|                                                                                     | C17                               | -0.982995095 | -4.451430167  | 3.222970046  |
|                                                                                     | C18                               | -2.020947999 | -4.182082693  | 4.325194647  |
|                                                                                     | C19                               | -1.157250440 | -3.616676212  | 1.936307885  |
|                                                                                     | C20                               | -1.296206125 | -2.124934535  | 2.257391962  |
|                                                                                     | C21                               | -0.001023349 | -3.886835846  | 0.969704463  |
|                                                                                     | C22                               | -4.395210828 | -4.115944473  | 4.956608061  |
|                                                                                     | C23                               | -4.545071378 | -5.277610518  | 5.959322462  |
|                                                                                     | C24                               | -5.716054731 | -3.766683723  | 4.229865676  |
|                                                                                     | C25                               | -6.872557517 | -3.632466733  | 5.226223348  |
|                                                                                     | C26                               | -5.555181763 | -2.478228125  | 3.412464283  |
|                                                                                     | C27                               | -4.824185425 | -7.656479066  | 6.343161411  |
|                                                                                     | C28                               | -3.776127285 | -7.719218757  | 7.437013059  |
|                                                                                     | C29                               | 9.453857254  | -9.474899287  | 2.009803454  |
|                                                                                     | C30                               | 9.351960607  | -8.081291723  | 2.619489222  |
|                                                                                     | C31                               | 7.893417525  | -6.662854675  | 4.050418559  |
|                                                                                     | C32                               | 8.135716832  | -6.709619476  | 5.569540103  |
|                                                                                     | C33                               | 6.413073984  | -6.391436809  | 3.734567918  |
|                                                                                     | C34                               | 5.935537464  | -5.054354291  | 4.291279608  |
|                                                                                     | C35                               | 4.556948639  | -4.665105568  | 3.765890386  |
|                                                                                     | C36                               | 3.153102354  | -2.843376543  | 4.771150803  |
|                                                                                     | C37                               | 9.065075270  | -5.506030031  | 7.489398367  |
|                                                                                     | C38                               | 8.311560410  | -4.384014169  | 8.167005170  |
|                                                                                     | C39                               | -1.345393984 | -1.916504975  | -5.686086734 |
|                                                                                     | C40                               | -2.646226134 | -1.282715575  | -5.157353899 |
|                                                                                     | C41                               | -0.243726893 | -1.731399797  | -4.620204118 |
|                                                                                     | C42                               | 1.038007258  | -2.559356048  | -4.840568255 |
|                                                                                     | C43                               | 2.114439695  | -1.866525869  | -5.699094267 |
|                                                                                     | C44                               | -3.942177053 | 0.812385427   | -5.212495293 |
|                                                                                     | C45                               | -5.364844429 | 0.238327824   | -5.204853288 |
|                                                                                     | C46                               | -3.855241201 | 2.145328234   | -5.967565367 |
|                                                                                     | C47                               | -6.960133870 | -1.282167242  | -6.277709616 |
|                                                                                     | C48                               | -7.318677320 | -2.183097265  | -5.091050139 |
|                                                                                     | C49                               | -6.536761689 | -3.364351249  | -3.089410732 |
|                                                                                     | C50                               | -6.380201319 | -2.594765650  | -1.776709693 |
|                                                                                     | C51                               | -5.949127319 | -0.462859650  | -0.654149004 |
|                                                                                     | C52                               | -7.320219078 | -0.074559525  | -0.042737391 |
|                                                                                     | C53                               | -5.219699729 | 0.863563640   | -0.914524124 |

|      |               |              |              |
|------|---------------|--------------|--------------|
| C54  | -3.791585042  | 0.815347201  | -1.361171062 |
| C55  | -2.779631279  | -0.112770079 | -1.299958403 |
| C56  | -1.919560392  | 1.753465393  | -2.147987589 |
| C57  | -9.628848388  | 0.623807931  | -0.585271231 |
| C58  | -10.274976870 | -0.257117222 | 0.480880682  |
| C59  | -10.488735333 | 0.656392396  | -1.870523546 |
| C60  | -11.685376419 | 1.563525403  | -1.857170298 |
| C61  | -12.639455103 | 1.789533661  | -0.884827341 |
| C62  | -13.075090795 | 2.999795254  | -2.688546315 |
| C63  | 3.890036766   | 0.783042906  | 9.185619964  |
| C64  | 5.332427579   | 0.349940624  | 9.370136988  |
| C65  | 3.402282122   | 0.163280142  | 7.852532060  |
| C66  | 1.955678199   | 0.470561325  | 7.549484628  |
| C67  | 0.920670253   | -0.377457495 | 7.984630218  |
| C68  | 1.601339065   | 1.619668811  | 6.822392138  |
| C69  | -0.419531639  | -0.098580138 | 7.695092311  |
| C70  | 0.269123708   | 1.919450547  | 6.538642626  |
| C71  | -0.741422560  | 1.054056250  | 6.968211760  |
| C72  | 0.105310251   | 6.929722923  | 5.488679040  |
| C73  | -1.192454019  | 7.620109135  | 5.030791220  |
| C74  | 0.312543993   | 5.630817672  | 4.717491766  |
| C75  | -2.166705775  | 9.606308842  | 3.931063598  |
| C76  | -2.869962690  | 9.141634254  | 2.653242799  |
| C77  | -2.844773467  | 7.429903983  | 0.841408070  |
| C78  | -3.546542328  | 6.110656557  | 1.256161334  |
| C79  | -1.690044960  | 7.192124103  | -0.159411783 |
| C80  | -1.954005567  | 6.387210603  | -1.436500303 |
| C81  | -2.700393033  | 7.105842292  | -2.570439509 |
| C82  | -5.095470958  | 7.803627336  | -2.621250201 |
| C83  | -3.523514707  | 4.077475495  | 2.623521994  |
| C84  | -4.769783535  | 4.273757549  | 3.498968009  |
| C85  | -2.535583813  | 3.187196549  | 3.412642899  |
| C86  | -5.604136593  | 5.426448638  | 5.489298299  |
| C87  | -6.720155665  | 6.450058635  | 5.360304783  |
| C88  | -7.787423622  | 8.105304244  | 3.924414868  |
| C89  | -9.272206325  | 7.766979097  | 3.651048998  |
| C90  | -7.260167664  | 9.109929360  | 2.898366858  |
| C91  | -7.314504562  | 8.616469688  | 1.458410653  |
| C92  | -10.890112957 | 6.060510789  | 2.958826431  |
| C93  | -11.930058030 | 6.154812647  | 4.066562158  |
| C94  | -10.819250551 | 4.610818300  | 2.400955778  |
| C95  | -9.902952182  | 4.508230132  | 1.202504011  |
| C96  | -10.393325018 | 4.768109666  | -0.086548693 |
| C97  | -8.537123591  | 4.210040503  | 1.341778295  |
| C98  | -9.550916918  | 4.759232119  | -1.200076294 |
| C99  | -7.671909593  | 4.223920987  | 0.243607360  |
| C100 | -8.190866597  | 4.504609826  | -1.017451226 |
| C101 | 8.938686128   | 4.151579564  | -4.077611393 |
| C102 | 7.626506518   | 3.712195130  | -4.703075033 |
| C103 | 5.162788997   | 3.632174956  | -4.373926904 |
| C104 | 4.237346689   | 4.844824789  | -4.538425149 |
| C105 | 3.037660169   | 6.619784872  | -3.333756245 |
| C106 | 3.335616425   | 7.659855983  | -2.255980064 |
| C107 | 4.319634127   | 8.250277681  | -0.112697309 |
| C108 | 5.123392454   | 9.470918004  | -0.515136806 |
| C109 | 4.061603742   | 3.157411406  | -8.783706747 |
| C110 | 2.567551667   | 3.486627539  | -8.886339086 |
| C111 | 4.260499815   | 1.899919290  | -7.906921823 |
| C112 | 5.674979213   | 1.314409586  | -8.073717757 |
| C113 | 5.921485878   | 0.240087500  | -7.039366656 |
| C114 | 0.632710080   | 4.611896918  | -7.915065413 |
| C115 | 0.459384581   | 6.056831005  | -7.492094699 |
| C116 | -0.343868391  | 3.617931164  | -7.240270805 |
| C117 | 0.110721938   | 3.327343943  | -5.840385264 |
| C118 | -0.214217254  | 4.197274141  | -4.787354797 |
| C119 | 1.031618181   | 2.289732548  | -5.610045811 |
| C120 | 0.443495596   | 4.087461264  | -3.557785491 |
| C121 | 1.676673184   | 2.175496037  | -4.378843963 |
| C122 | 1.416676789   | 3.105572852  | -3.365954390 |
| C123 | 11.130349373  | 0.469271955  | 0.304678705  |
| C124 | 11.588996495  | 0.007511496  | 1.698374255  |
| C125 | 10.121826234  | -0.525805131 | -0.287042828 |
| C126 | 9.441719067   | -0.117796727 | -1.556017038 |
| C127 | 10.028297184  | 0.220444721  | -2.757832878 |
| C128 | 7.840507341   | 0.043621381  | -3.044545567 |
| C129 | 12.449367764  | -1.751626485 | 3.133819297  |
| C130 | 13.484288747  | -0.857739351 | 3.780602433  |
| C131 | 4.609601928   | -4.670264493 | -2.208992961 |
| C132 | 5.532215026   | -4.575922064 | -0.996206155 |
| C133 | 6.738501280   | -3.607092660 | -1.183517996 |
| C134 | 7.780590609   | -4.245768154 | -2.144256522 |
| C135 | 9.145825166   | -3.554153532 | -2.190191989 |

|       |              |               |              |
|-------|--------------|---------------|--------------|
| C136  | 10.228188723 | -4.321990135  | -2.982654696 |
| C137  | 7.423249587  | -3.375070012  | 0.172323292  |
| C138  | 3.807014112  | 1.791965262   | 0.917362351  |
| Fe139 | 5.300311950  | 1.917450545   | -0.382278102 |
| Fe140 | 1.860745724  | 1.715310200   | 0.811061788  |
| Fe141 | 3.600463383  | 2.346153883   | 2.795184072  |
| Fe142 | 3.771735846  | 3.735278046   | 0.615525476  |
| Fe143 | 1.918885266  | 4.307827726   | 2.482831624  |
| Fe144 | 5.125333425  | 0.582594366   | 1.770554948  |
| Fe145 | 3.371002854  | -0.319275598  | -0.143268450 |
| H146  | 0.080751743  | -6.861290719  | -6.981099301 |
| H147  | -0.071690975 | -5.321923225  | -7.499213231 |
| H148  | -4.259939232 | -6.346437952  | -7.795680153 |
| H149  | -2.080237427 | -5.833436867  | -8.704037437 |
| H150  | -1.899833799 | -7.517484104  | -8.227082190 |
| H151  | -4.641813719 | -4.984476079  | -5.352916384 |
| H152  | -4.204198922 | -8.473912099  | -5.837448108 |
| H153  | -5.854373986 | -5.973234892  | -6.197852931 |
| H154  | -4.160564186 | -10.207526441 | -4.289410743 |
| H155  | -2.141231348 | -7.882312841  | -4.248465009 |
| H156  | -5.251877800 | -9.279636445  | -3.235231521 |
| H157  | -2.232919632 | -4.103348820  | -0.718999876 |
| H158  | -2.465119853 | -5.754913392  | -3.040006516 |
| H159  | -0.234938554 | -7.434714144  | -2.990961384 |
| H160  | -6.207178328 | -6.005556922  | 0.948956819  |
| H161  | -4.792628649 | -6.578826708  | -1.500376099 |
| H162  | -0.714393229 | -8.646251487  | -1.777732677 |
| H163  | -3.531017204 | -4.066311811  | -1.930370415 |
| H164  | -3.806228309 | -8.596596283  | 0.187560698  |
| H165  | -6.382996168 | -7.469451221  | -0.054254188 |
| H166  | 0.072268756  | -4.951561951  | 0.714172041  |
| H167  | -0.151475768 | -3.334962224  | 0.028056783  |
| H168  | 0.955656386  | -3.543229401  | 1.386450036  |
| H169  | -2.095985638 | -3.943997065  | 1.465388908  |
| H170  | -3.288949566 | -10.418887041 | 1.538167119  |
| H171  | -4.777955562 | -2.570485153  | 2.642186749  |
| H172  | -4.690497210 | -6.700516622  | 4.438884706  |
| H173  | -7.054587904 | -4.564128515  | 5.780542806  |
| H174  | -0.360616123 | -1.700965383  | 2.654048538  |
| H175  | -2.102219507 | -1.931921028  | 2.981659505  |
| H176  | 3.299940232  | 0.329731614   | 10.004652436 |
| H177  | -6.496354246 | -2.226769714  | 2.902757221  |
| H178  | -7.796454010 | -3.366958101  | 4.692599653  |
| H179  | -5.293303402 | -1.634785224  | 4.072676006  |
| H180  | -6.664660578 | -2.835325244  | 5.957848442  |
| H181  | -5.946423328 | -4.595924088  | 3.536250320  |
| H182  | -4.090020742 | -3.258946658  | 5.576191674  |
| H183  | -3.580677291 | -4.571838441  | 3.019332399  |
| H184  | -1.547168777 | -1.569442232  | 1.340785260  |
| H185  | -1.546382440 | 3.240580040   | 2.928796239  |
| H186  | -2.907845602 | 2.155379759   | 3.336746637  |
| H187  | -2.375360996 | 2.776313169   | 5.329884430  |
| H188  | -2.651245885 | 0.693834638   | 6.951130854  |
| H189  | 0.008637815  | 2.806558391   | 5.962062781  |
| H190  | 2.384493532  | 2.281734910   | 6.447562901  |
| H191  | 1.163774764  | -1.280710541  | 8.550217714  |
| H192  | -1.639123511 | -6.289843870  | 2.357648071  |
| H193  | 0.852625225  | -8.261876106  | 2.013927056  |
| H194  | 0.234724303  | -8.762067903  | 3.603549665  |
| H195  | -1.398391275 | -8.192845067  | 1.177992240  |
| H196  | -4.228969770 | -9.707361263  | 2.871937025  |
| H197  | -1.208771791 | -0.780095098  | 8.023633390  |
| H198  | -0.021665443 | -4.187324714  | 3.679572367  |
| H199  | -5.822545935 | -7.650665680  | 6.808032644  |
| H200  | -4.728827954 | -8.579215252  | 5.751550649  |
| H201  | -2.798320571 | -7.249060076  | 7.182522106  |
| H202  | 10.143819310 | -5.385753117  | 7.675108618  |
| H203  | 4.144895215  | -1.822303243  | -5.958225738 |
| H204  | 5.150391569  | -2.836871711  | -2.438852364 |
| H205  | 5.767454652  | 0.861241462   | -9.071191477 |
| H206  | 6.427451548  | 2.110290900   | -7.983414090 |
| H207  | 3.521383361  | 1.129518216   | -8.175513337 |
| H208  | 1.363611977  | 6.693465178   | -7.641553202 |
| H209  | 4.337661218  | 2.886922369   | -9.815161346 |
| H210  | 0.008232815  | -0.660289459  | -4.554312125 |
| H211  | 0.788130036  | -3.522612457  | -5.318417846 |
| H212  | 2.616022499  | 4.535133568   | -7.091777809 |
| H213  | 0.371345987  | 4.624659587   | -8.994337548 |
| H214  | 4.754429764  | 4.575004218   | -7.429652327 |
| H215  | 3.628180434  | -2.789348063  | -4.580501521 |
| H216  | 4.069970707  | 2.165802968   | -6.855463203 |
| H217  | 5.839436086  | 4.168450752   | -8.602166499 |

|      |               |              |              |
|------|---------------|--------------|--------------|
| H218 | -1.291594464  | -1.892434882 | -7.751534077 |
| H219 | -0.676192838  | -2.029666535 | -3.653872847 |
| H220 | 6.899892575   | 1.571203972  | -5.978603588 |
| H221 | 1.472313005   | -2.817035502 | -3.863570977 |
| H222 | -5.436457919  | -1.056159457 | 0.115866331  |
| H223 | -2.780525543  | -1.140916970 | -0.961476963 |
| H224 | -7.574296797  | -3.725434063 | -3.127112303 |
| H225 | -5.331266483  | -2.293871871 | -4.489839936 |
| H226 | -8.161690490  | -0.208972761 | -1.908432979 |
| H227 | -12.759042082 | 1.411984228  | 0.124371991  |
| H228 | -10.038851509 | -1.343231716 | 0.372814344  |
| H229 | -10.781882009 | -0.377230184 | -2.130212675 |
| H230 | -9.510887586  | 1.639943094  | -0.176851770 |
| H231 | -13.589443717 | 3.701315577  | -3.340030558 |
| H232 | -5.262941643  | 1.435196090  | 0.027495807  |
| H233 | -5.792123657  | 1.438274254  | -1.660395543 |
| H234 | -14.329182234 | 3.098550480  | -0.973511771 |
| H235 | -9.8444408911 | 1.008143735  | -2.691711099 |
| H236 | -5.990276310  | -0.808845172 | -2.775630742 |
| H237 | -5.890114811  | -4.253942946 | -3.041699346 |
| H238 | -7.766708948  | -0.540614370 | -6.353623231 |
| H239 | -1.209384301  | 2.467579920  | -2.556628636 |
| H240 | -6.979696760  | -1.893031668 | -7.189104393 |
| H241 | 3.967051081   | 2.626814160  | 10.076314659 |
| H242 | 2.897279527   | 2.539538266  | 8.844331319  |
| H243 | -1.935376281  | 5.526294125  | 2.452472928  |
| H244 | -3.855412590  | 3.518035292  | 1.736156144  |
| H245 | -3.821951737  | 5.835365305  | 4.430066847  |
| H246 | -3.763732851  | 2.833406755  | -2.129580977 |
| H247 | -4.813324264  | 3.768409165  | -3.728949213 |
| H248 | -4.870091954  | 3.824677248  | -5.988126424 |
| H249 | -5.735378861  | 4.050113352  | -2.462318110 |
| H250 | -2.808742121  | 2.490335481  | -5.936630907 |
| H251 | -4.148778170  | 2.000493389  | -7.019164488 |
| H252 | -6.247031751  | 9.428435050  | 3.179723178  |
| H253 | -7.911598997  | 9.996353839  | 2.951899815  |
| H254 | -5.375049366  | 9.273756118  | 1.138094850  |
| H255 | -6.209974382  | 8.534580291  | -0.226610960 |
| H256 | -5.541959211  | 9.790063511  | -2.855933000 |
| H257 | -2.316341267  | 6.763875453  | -3.543352915 |
| H258 | -9.952112122  | 4.950772939  | -2.199230921 |
| H259 | -8.118133978  | 3.951093210  | 2.317120357  |
| H260 | -6.625137822  | 6.503443495  | -2.155949872 |
| H261 | -0.885280666  | 6.677173447  | 0.389463656  |
| H262 | -1.401069724  | 7.758345428  | 2.376175724  |
| H263 | -2.443839134  | 5.427101698  | -1.211438079 |
| H264 | -4.933103515  | -0.878524073 | -6.858560411 |
| H265 | -1.827557898  | 10.638658311 | 3.772324390  |
| H266 | -2.268470796  | 0.149816641  | -6.491705897 |
| H267 | -1.286424363  | 8.180709677  | -0.432470899 |
| H268 | -6.605515626  | 4.045747851  | 0.382029553  |
| H269 | -2.936146068  | 9.622394989  | 4.716651143  |
| H270 | -3.928186804  | 9.359450215  | -3.298250841 |
| H271 | -7.121963082  | 8.050990574  | -2.757204302 |
| H272 | 0.054009458   | -1.214203897 | -7.025446401 |
| H273 | -1.556816547  | -2.999085836 | -5.761011501 |
| H274 | -11.454437300 | 4.983608729  | -0.229766156 |
| H275 | -3.720109051  | 0.997368575  | -4.151999409 |
| H276 | -3.623442145  | 8.062975471  | 0.405190204  |
| H277 | -2.504446561  | 8.183873737  | -2.511511378 |
| H278 | -0.961591734  | 6.136095743  | -1.833678751 |
| H279 | -4.442896910  | 5.875407221  | -2.558670876 |
| H280 | -6.069037315  | 4.443699132  | 5.660565051  |
| H281 | -6.224512402  | 6.719074911  | 3.395452646  |
| H282 | -7.819563355  | 8.620972751  | 4.896966445  |
| H283 | -5.023608946  | 5.690391658  | 6.383339053  |
| H284 | -8.792071560  | 5.826712892  | 3.305348875  |
| H285 | 8.780789876   | 5.055602783  | -3.471580218 |
| H286 | 9.216645254   | 3.339729019  | -3.373145967 |
| H287 | 10.627662218  | 1.432172060  | 0.475879967  |
| H288 | 10.858635800  | 4.482373069  | -4.675111565 |
| H289 | 9.974216825   | 3.613867232  | -5.745390089 |
| H290 | 1.252097536   | 5.178609288  | 5.068267467  |
| H291 | -0.798486450  | 6.121878069  | 7.131482133  |
| H292 | -0.098819427  | 9.161836625  | 4.219283377  |
| H293 | -0.519904356  | 4.941938996  | 4.922396853  |
| H294 | 0.018886668   | 7.499177349  | 7.461764761  |
| H295 | 4.885519012   | 7.732786183  | 0.678017906  |
| H296 | 0.960301142   | 7.597795348  | 5.302947020  |
| H297 | 5.803835304   | -7.222063411 | 4.129628000  |
| H298 | 8.507685528   | -5.873960423 | 3.597602262  |
| H299 | 4.525777963   | 6.376498565  | -1.114131966 |

|       |               |               |              |
|-------|---------------|---------------|--------------|
| H300  | 2.186393143   | -1.167974612  | 5.455722935  |
| H301  | 3.095726814   | 7.123912627   | -4.306351307 |
| H302  | 2.387810187   | 1.365718874   | -4.198554499 |
| H303  | 1.982786836   | 6.325725440   | -3.192666635 |
| H304  | 3.789779096   | -5.344081353  | 4.154901750  |
| H305  | 4.134604925   | 4.946037221   | -2.508445223 |
| H306  | 4.527968250   | -4.730730285  | 2.666263788  |
| H307  | 6.309724470   | -6.396204573  | 2.637716998  |
| H308  | 6.646978814   | -4.265852837  | 4.004500039  |
| H309  | 5.902230268   | -5.074937309  | 5.391641091  |
| H310  | -0.366164205  | 2.705291438   | -7.851768732 |
| H311  | 7.732677222   | -8.762247151  | 3.576031213  |
| H312  | 9.161829072   | -9.363570374  | 0.953856490  |
| H313  | 1.939284460   | 3.028194681   | -2.413429965 |
| H314  | 9.054674483   | -10.911301300 | 3.431131529  |
| H315  | 8.326597749   | -11.197109674 | 1.992071786  |
| H316  | 4.977029454   | -2.602260623  | 3.929188085  |
| H317  | 0.218270015   | 4.779404722   | -2.743543418 |
| H318  | 1.253721387   | 1.575618884   | -6.406991471 |
| H319  | 11.877954493  | -4.278567426  | 0.642599775  |
| H320  | 10.636969834  | -1.482857196  | -0.477145186 |
| H321  | 9.481191692   | -4.295890814  | 1.541413136  |
| H322  | 12.117546587  | -4.113615371  | -0.883443105 |
| H323  | 5.760945175   | 9.334245171   | -1.421959634 |
| H324  | 7.471068556   | -2.059422258  | 2.453680387  |
| H325  | 5.872545655   | -5.583185098  | -0.729371806 |
| H326  | 6.625816497   | 4.459414007   | -3.085440098 |
| H327  | 7.918627998   | -5.287117457  | -1.813192357 |
| H328  | 9.105311828   | 0.497290142   | -4.668994213 |
| H329  | 6.882663452   | 0.019698968   | -3.548931688 |
| H330  | 10.523348354  | -9.748317787  | 2.013968751  |
| H331  | 3.753346580   | -0.849129492  | 4.763686809  |
| H332  | 8.855432153   | -2.881033295  | 4.190466347  |
| H333  | 7.262557669   | -1.051596794  | 3.614298582  |
| H334  | 9.084451609   | -4.855050042  | 5.442086129  |
| H335  | 2.021358575   | -4.599637118  | 4.682982778  |
| H336  | 9.036686839   | -2.564042946  | -2.657970719 |
| H337  | 9.525926774   | -3.389029662  | -1.173036241 |
| H338  | 7.342392878   | -4.284243825  | -3.153283050 |
| H339  | 4.763070820   | 2.946490883   | -3.610435750 |
| H340  | -0.940080275  | 4.996028836   | -4.957175288 |
| H341  | -1.342391663  | 4.079396000   | -7.265177519 |
| H342  | 4.904448536   | -4.205953771  | -0.167288582 |
| H343  | 9.970983337   | -3.786471564  | 3.592795225  |
| H344  | 10.342044792  | -5.430912828  | 2.141504849  |
| H345  | 1.315226621   | -3.286107473  | 5.544964224  |
| H346  | 11.069575715  | 0.364325307   | -3.019573958 |
| H347  | 9.358453575   | -0.744282532  | 0.468055930  |
| H348  | 5.212348483   | 3.113721136   | -5.334058495 |
| H349  | 3.360430959   | 8.574645867   | 0.319390444  |
| H350  | 3.550809408   | -0.924181226  | 7.914191483  |
| H351  | 4.040496339   | 0.539539316   | 7.037410333  |
| H352  | 12.884709615  | 1.413889293   | -0.178084962 |
| H353  | 12.820505948  | -0.128277511  | -0.717673593 |
| H354  | 12.914813437  | -2.740503325  | 2.993324032  |
| H355  | 12.079328452  | -1.928198320  | 1.042430772  |
| H356  | 14.116711236  | -0.279811825  | 3.064682390  |
| H357  | 11.593393544  | -1.883291539  | 3.815129690  |
| H358  | 6.075406630   | 0.988520464   | 8.834017946  |
| H359  | -11.515996746 | 6.165783832   | 5.102701796  |
| H360  | 8.744465167   | -6.446777266  | 7.972102935  |
| H361  | 7.351782833   | -4.090967138  | 7.675388233  |
| H362  | -11.210506905 | 6.738132284   | 2.150297743  |
| H363  | -10.485190176 | 3.934853783   | 3.203059219  |
| H364  | -11.843194911 | 4.317779434   | 2.127979194  |
| H365  | 3.184023697   | -1.493327114  | -1.044962655 |
| H366  | 2.552196282   | -0.343109362  | 2.249360243  |
| H367  | -7.822249434  | 4.534274718   | -2.932942194 |
| H368  | 1.123897162   | -1.124634307  | 0.012796821  |
| H369  | -0.652431420  | 0.159762294   | -1.724499009 |
| M0370 | 6.198072974   | -0.674473960  | -0.384825920 |
| N371  | -0.272253232  | -6.291619743  | -7.753907890 |
| N372  | -3.905589896  | -6.289312707  | -6.844313423 |
| N373  | -4.452010160  | -8.232205067  | -4.880355820 |
| N374  | -2.110437927  | -8.289081876  | -3.312219840 |
| N375  | -2.332939143  | -5.752046064  | -2.030135486 |
| N376  | -4.731618370  | -6.290146433  | -0.520502430 |
| N377  | -4.015172102  | -8.500947060  | 1.184945118  |
| N378  | -1.231464009  | -8.471185812  | 2.150465641  |
| N379  | -0.910121685  | -5.875781558  | 2.936008631  |
| N380  | -3.326054500  | -4.366633682  | 3.989086549  |
| N381  | -4.619150652  | -6.532530851  | 5.445804624  |

|      |               |               |              |
|------|---------------|---------------|--------------|
| N382 | 8.570446714   | -10.457800852 | 2.652941055  |
| N383 | 8.297541977   | -7.917154593  | 3.441004357  |
| N384 | 4.252539866   | -3.288119184  | 4.156209768  |
| N385 | 2.147760805   | -3.677623488  | 5.112820196  |
| N386 | 3.057089222   | -1.540258271  | 5.087727557  |
| N387 | 8.773902620   | -5.624346777  | 6.075303120  |
| N388 | -0.976325309  | -1.311526982  | -6.972125202 |
| N389 | 3.385135593   | -2.222141356  | -5.397538207 |
| N390 | -2.952592813  | -0.101361737  | -5.757254532 |
| N391 | -5.666743341  | -0.626155226  | -6.200225172 |
| N392 | -6.289545166  | -2.611370047  | -4.305938015 |
| N393 | -6.067288496  | -1.265533870  | -1.862394751 |
| N394 | -3.221219953  | 1.962427562   | -1.900364695 |
| N395 | -1.639657536  | 0.493154969   | -1.797781594 |
| N396 | -8.326386973  | 0.068444706   | -0.943652885 |
| N397 | -11.970599894 | 2.324935806   | -2.980894870 |
| N398 | -13.511539765 | 2.707269598   | -1.431922523 |
| N399 | 3.833914296   | 2.246141307   | 9.135679157  |
| N400 | 0.070255824   | 6.626855812   | 6.928003881  |
| N401 | -1.038520633  | 8.802866384   | 4.366366729  |
| N402 | -2.277348801  | 8.127029760   | 1.990744365  |
| N403 | -4.148747468  | 6.869512304   | -2.549186875 |
| N404 | -4.799404122  | 9.098127978   | -2.848843234 |
| N405 | -6.381815068  | 7.475667277   | -2.363092311 |
| N406 | -2.917839214  | 5.337748202   | 2.187284147  |
| N407 | -4.714767562  | 5.341409404   | 4.345166273  |
| N408 | -6.914678075  | 6.960077774   | 4.106146897  |
| N409 | -6.250781541  | 8.978007271   | 0.689013760  |
| N410 | -9.575279521  | 6.460766051   | 3.444709694  |
| N411 | 9.937327876   | 4.419853047   | -5.114564760 |
| N412 | 6.514373665   | 4.037402802   | -4.010189381 |
| N413 | 3.889921168   | 5.445849188   | -3.379437033 |
| N414 | 4.130714401   | 7.316267876   | -1.210939580 |
| N415 | 4.848119803   | 4.344415594   | -8.426128779 |
| N416 | 2.032881860   | 4.235256807   | -7.879362047 |
| N417 | 12.261776493  | 0.722833153   | -0.605373286 |
| N418 | 8.063735397   | -0.211563507  | -1.754700120 |
| N419 | 9.005169384   | 0.319445875   | -3.673855486 |
| N420 | 12.048475590  | -1.267175282  | 1.823621551  |
| N421 | -1.796673174  | 1.511476819   | 1.048345964  |
| N422 | 2.042949685   | -0.175877595  | 1.367625075  |
| N423 | -0.691102178  | 1.571014669   | 0.959779248  |
| N424 | 1.814104657   | -1.337746119  | 0.757063083  |
| O425 | -2.076295558  | -6.086794120  | -5.506477393 |
| O426 | -5.126184933  | -6.578500044  | -3.461783093 |
| O427 | -3.288448656  | -9.336646504  | -1.657311595 |
| O428 | -1.362272583  | -6.761004601  | -0.233793262 |
| O429 | -3.975451797  | -4.753041911  | 0.968980655  |
| O430 | -5.362505732  | -7.524173175  | 2.757743593  |
| O431 | -2.042456105  | -9.493411142  | 4.034560232  |
| O432 | 1.170311911   | -6.277518844  | 3.842112464  |
| O433 | -1.657032829  | -3.832097097  | 5.459275163  |
| O434 | -4.598966290  | -5.070306579  | 7.183381032  |
| O435 | -3.952981031  | -8.297244509  | 8.498838987  |
| O436 | 10.189187839  | -7.206006897  | 2.318041923  |
| O437 | 7.738347964   | -7.670598432  | 6.250633636  |
| O438 | 8.694984801   | -3.834779059  | 9.188162729  |
| O439 | -3.339677652  | -1.790008415  | -4.254199399 |
| O440 | 1.829288402   | -1.123657938  | -6.642444336 |
| O441 | -6.170938994  | 0.552272067   | -4.310506961 |
| O442 | -4.727191024  | 3.108387542   | -5.344444158 |
| O443 | -8.502178417  | -2.497866520  | -4.908511462 |
| O444 | -6.540521444  | -3.177440143  | -0.699369414 |
| O445 | -7.442021716  | 0.176986808   | 1.159612143  |
| O446 | -11.017185542 | 0.152714061   | 1.356154460  |
| O447 | 5.682377940   | -0.623208674  | 10.020919917 |
| O448 | -2.041015272  | 1.383405010   | 6.631029188  |
| O449 | -2.315020977  | 7.138307946   | 5.258689037  |
| O450 | -3.920610647  | 9.707978405   | 2.294145441  |
| O451 | -4.635582157  | 5.800179388   | 0.748566497  |
| O452 | -5.707843606  | 3.467245437   | 3.466529327  |
| O453 | -2.432227109  | 3.585438317   | 4.780705156  |
| O454 | -7.406776026  | 6.773059824   | 6.336661451  |
| O455 | -10.132685759 | 8.658134403   | 3.685516231  |
| O456 | -8.284140447  | 7.986392523   | 1.013348171  |
| O457 | -13.131171396 | 6.188792026   | 3.850703597  |
| O458 | -7.298022623  | 4.567557943   | -2.108916261 |
| O459 | 7.614217161   | 3.059448498   | -5.774216742 |
| O460 | 3.868578210   | 5.243380930   | -5.661946977 |
| O461 | 2.804150311   | 8.779438394   | -2.333922120 |
| O462 | 5.120567442   | 10.515020643  | 0.116851670  |
| O463 | 1.878834089   | 3.067507375   | -9.831758403 |



|                                                                                                                                                                                                                                                          |      |              |                                    |              |
|----------------------------------------------------------------------------------------------------------------------------------------------------------------------------------------------------------------------------------------------------------|------|--------------|------------------------------------|--------------|
|                                                                                                                                                                                                                                                          | O464 | 5.500913854  | -0.907353522                       | -7.143248094 |
|                                                                                                                                                                                                                                                          | O465 | 6.596316174  | 0.612469273                        | -5.932193703 |
|                                                                                                                                                                                                                                                          | O466 | -0.586652678 | 6.534589300                        | -7.076704421 |
|                                                                                                                                                                                                                                                          | O467 | 11.581062972 | 0.781312618                        | 2.675501560  |
|                                                                                                                                                                                                                                                          | O468 | 13.683793392 | -0.813047377                       | 4.986597059  |
|                                                                                                                                                                                                                                                          | O469 | 4.453229894  | -3.526084377                       | -2.889244181 |
|                                                                                                                                                                                                                                                          | O470 | 4.007480543  | -5.697657889                       | -2.514253708 |
|                                                                                                                                                                                                                                                          | O471 | 11.404678275 | -4.354183836                       | -2.476696020 |
|                                                                                                                                                                                                                                                          | O472 | 9.889928254  | -4.833993615                       | -4.086690761 |
|                                                                                                                                                                                                                                                          | O473 | 7.537389923  | -2.129768802                       | 0.561415299  |
|                                                                                                                                                                                                                                                          | O474 | 7.868595438  | -4.334413099                       | 0.828325799  |
|                                                                                                                                                                                                                                                          | O475 | 6.226622016  | -2.367638092                       | -1.678575812 |
|                                                                                                                                                                                                                                                          | O476 | 9.615135345  | -3.451061497                       | 4.462005963  |
|                                                                                                                                                                                                                                                          | O477 | 7.345487684  | -2.007165696                       | 3.435041599  |
|                                                                                                                                                                                                                                                          | O478 | -4.802400441 | 4.089209376                        | -2.787114769 |
|                                                                                                                                                                                                                                                          | O479 | 12.585015597 | -4.042727910                       | 0.001149607  |
|                                                                                                                                                                                                                                                          | O480 | 10.353478394 | -4.451487421                       | 1.992166608  |
|                                                                                                                                                                                                                                                          | S481 | 0.412758460  | 5.898738812                        | 2.889103170  |
|                                                                                                                                                                                                                                                          | S482 | 1.563336973  | 3.951402773                        | 0.305168295  |
|                                                                                                                                                                                                                                                          | S483 | 4.685593795  | 0.344377724                        | -1.886668855 |
|                                                                                                                                                                                                                                                          | S484 | 1.422583088  | 2.219194141                        | 3.062423506  |
|                                                                                                                                                                                                                                                          | S485 | 1.648422645  | 0.788565496                        | -1.227310891 |
|                                                                                                                                                                                                                                                          | S486 | 5.427471644  | 4.099150603                        | -0.805866554 |
|                                                                                                                                                                                                                                                          | S487 | 4.705388487  | -1.549851482                       | 1.179838424  |
|                                                                                                                                                                                                                                                          | S488 | 4.105714347  | 4.530499467                        | 2.708625235  |
|                                                                                                                                                                                                                                                          | S489 | 7.045398175  | 1.187792115                        | 0.831801389  |
|                                                                                                                                                                                                                                                          | S490 | 4.903846807  | 0.961024400                        | 3.912887447  |
|                                                                                                                                                                                                                                                          | end  |              |                                    |              |
| <b>Fe2-brNH-NH2-Fe6</b><br><b>2N2 associated</b><br><b>35, S=1</b><br><br><b>Fe (139) -2.346</b><br><b>Fe (140) 0.124</b><br><b>Fe (141) -2.556</b><br><b>Fe (142) 2.597</b><br><b>Fe (143) 2.484</b><br><b>Fe (144) 2.337</b><br><b>Fe (145) -0.027</b> |      |              | <b>bm626x2nh6nh22n2xdt1f.car_4</b> |              |
|                                                                                                                                                                                                                                                          | C1   | -2.350289601 | -6.684021260                       | -6.504010976 |
|                                                                                                                                                                                                                                                          | C2   | -1.585004261 | -6.916131982                       | -7.813110735 |
|                                                                                                                                                                                                                                                          | C3   | -4.577857881 | -6.443496634                       | -5.490897320 |
|                                                                                                                                                                                                                                                          | C4   | -4.486966470 | -7.385059712                       | -4.294198781 |
|                                                                                                                                                                                                                                                          | C5   | -3.833927472 | -9.579459860                       | -3.438469042 |
|                                                                                                                                                                                                                                                          | C6   | -2.715008193 | -9.166622878                       | -2.477101572 |
|                                                                                                                                                                                                                                                          | C7   | -0.683807279 | -7.857238305                       | -2.147044479 |
|                                                                                                                                                                                                                                                          | C8   | -1.267261286 | -6.743020447                       | -1.276402833 |
|                                                                                                                                                                                                                                                          | C9   | -2.878166706 | -4.886689195                       | -1.154598942 |
|                                                                                                                                                                                                                                                          | C10  | -3.680749875 | -5.412430116                       | 0.045151311  |
|                                                                                                                                                                                                                                                          | C11  | -5.292764053 | -7.006861138                       | 0.889853436  |
|                                                                                                                                                                                                                                                          | C12  | -4.509831454 | -7.725902684                       | 1.995465761  |
|                                                                                                                                                                                                                                                          | C13  | -2.910416589 | -9.495713126                       | 2.528881629  |
|                                                                                                                                                                                                                                                          | C14  | -1.670531059 | -8.896173899                       | 3.197913848  |
|                                                                                                                                                                                                                                                          | C15  | 0.320061102  | -7.491712091                       | 2.894587173  |
|                                                                                                                                                                                                                                                          | C16  | 0.397510521  | -6.018675905                       | 3.277136866  |
|                                                                                                                                                                                                                                                          | C17  | -0.727383623 | -3.807078022                       | 3.208032467  |
|                                                                                                                                                                                                                                                          | C18  | -1.606749066 | -3.471599899                       | 4.423358150  |
|                                                                                                                                                                                                                                                          | C19  | -1.126988178 | -3.030044632                       | 1.937755288  |
|                                                                                                                                                                                                                                                          | C20  | -1.109061545 | -1.525437258                       | 2.225198434  |
|                                                                                                                                                                                                                                                          | C21  | -0.232188517 | -3.462130542                       | 0.773710837  |
|                                                                                                                                                                                                                                                          | C22  | -3.919655679 | -3.364456691                       | 5.283875083  |
|                                                                                                                                                                                                                                                          | C23  | -3.962746748 | -4.548723844                       | 6.263604930  |
|                                                                                                                                                                                                                                                          | C24  | -5.307651553 | -3.028952219                       | 4.683995938  |
|                                                                                                                                                                                                                                                          | C25  | -6.376212216 | -2.901782292                       | 5.774479016  |
|                                                                                                                                                                                                                                                          | C26  | -5.241117465 | -1.745787675                       | 3.846934637  |
|                                                                                                                                                                                                                                                          | C27  | -4.054814707 | -6.955980627                       | 6.566981309  |
|                                                                                                                                                                                                                                                          | C28  | -3.004954121 | -6.976883172                       | 7.658944787  |
|                                                                                                                                                                                                                                                          | C29  | 10.139060485 | -8.930468799                       | 2.143116274  |
|                                                                                                                                                                                                                                                          | C30  | 9.900888509  | -7.486548248                       | 2.588778797  |
|                                                                                                                                                                                                                                                          | C31  | 8.330884382  | -6.046146283                       | 3.890511445  |
|                                                                                                                                                                                                                                                          | C32  | 8.637965808  | -6.071312205                       | 5.400814181  |
|                                                                                                                                                                                                                                                          | C33  | 6.828725287  | -5.836643651                       | 3.621456564  |
|                                                                                                                                                                                                                                                          | C34  | 6.293850234  | -4.505704246                       | 4.154376946  |
|                                                                                                                                                                                                                                                          | C35  | 4.846684035  | -4.260753086                       | 3.713477483  |
|                                                                                                                                                                                                                                                          | C36  | 3.313351107  | -2.452828001                       | 4.583440004  |
|                                                                                                                                                                                                                                                          | C37  | 9.713413911  | -4.894514973                       | 7.260215511  |
|                                                                                                                                                                                                                                                          | C38  | 8.951204545  | -3.825229390                       | 8.012855178  |
|                                                                                                                                                                                                                                                          | C39  | -1.365971491 | -2.271406219                       | -5.659750507 |
|                                                                                                                                                                                                                                                          | C40  | -2.697241732 | -1.725275365                       | -5.108677580 |
|                                                                                                                                                                                                                                                          | C41  | -0.263972694 | -1.992869837                       | -4.611853092 |
|                                                                                                                                                                                                                                                          | C42  | 1.079444908  | -2.722137596                       | -4.827658750 |
|                                                                                                                                                                                                                                                          | C43  | 2.091174185  | -2.009888365                       | -5.725746707 |
|                                                                                                                                                                                                                                                          | C44  | -4.100142982 | 0.306015849                        | -5.121743962 |
|                                                                                                                                                                                                                                                          | C45  | -5.494005263 | -0.337001341                       | -5.090389981 |
|                                                                                                                                                                                                                                                          | C46  | -4.093064153 | 1.639622213                        | -5.881416246 |
|                                                                                                                                                                                                                                                          | C47  | -7.023101046 | -1.955572655                       | -6.116472758 |
|                                                                                                                                                                                                                                                          | C48  | -7.317606981 | -2.843078371                       | -4.901554888 |
|                                                                                                                                                                                                                                                          | C49  | -6.444670576 | -3.918344859                       | -2.878819144 |
|                                                                                                                                                                                                                                                          | C50  | -6.301291110 | -3.109351985                       | -1.589533852 |
|                                                                                                                                                                                                                                                          | C51  | -5.953071829 | -0.936847996                       | -0.520231011 |
|                                                                                                                                                                                                                                                          | C52  | -7.336244489 | -0.629930720                       | 0.106545127  |

|      |               |              |              |
|------|---------------|--------------|--------------|
| C53  | -5.320736984  | 0.429812733  | -0.822041729 |
| C54  | -3.890182179  | 0.468270342  | -1.262943522 |
| C55  | -2.816029185  | -0.383934816 | -1.173805908 |
| C56  | -2.089868291  | 1.499486785  | -2.092730812 |
| C57  | -9.694639785  | -0.120825321 | -0.393900259 |
| C58  | -10.269283171 | -1.058551384 | 0.667297931  |
| C59  | -10.580985051 | -0.134893947 | -1.660756666 |
| C60  | -11.827496396 | 0.700015309  | -1.617970873 |
| C61  | -12.776309036 | 0.865400329  | -0.627601220 |
| C62  | -13.313242556 | 2.056103879  | -2.417619710 |
| C63  | 4.101556923   | 0.917794805  | 9.039525697  |
| C64  | 5.574284638   | 0.579955725  | 9.182302467  |
| C65  | 3.614434793   | 0.296416870  | 7.706703188  |
| C66  | 2.140311469   | 0.521363985  | 7.462511061  |
| C67  | 1.173853571   | -0.386493553 | 7.933194035  |
| C68  | 1.690578499   | 1.657781410  | 6.765533862  |
| C69  | -0.190787431  | -0.180253691 | 7.704675812  |
| C70  | 0.332033719   | 1.884194095  | 6.543742947  |
| C71  | -0.607244406  | 0.958090370  | 7.004148014  |
| C72  | -0.149318523  | 6.875627559  | 5.375211029  |
| C73  | -1.491983757  | 7.492084591  | 4.941587507  |
| C74  | 0.068719539   | 5.541337974  | 4.666879262  |
| C75  | -2.607297295  | 9.403819918  | 3.852170252  |
| C76  | -3.334638224  | 8.864709950  | 2.617952491  |
| C77  | -3.268391043  | 7.128527819  | 0.831682407  |
| C78  | -3.892869557  | 5.787923170  | 1.302794802  |
| C79  | -2.137383427  | 6.914767265  | -0.200900003 |
| C80  | -2.416021029  | 6.068802459  | -1.448956713 |
| C81  | -3.210444304  | 6.741675293  | -2.581140764 |
| C82  | -5.650185955  | 7.285927573  | -2.606980393 |
| C83  | -3.718081248  | 3.782220428  | 2.705027151  |
| C84  | -4.940626662  | 3.931089955  | 3.620810078  |
| C85  | -2.660532555  | 2.956277099  | 3.473369901  |
| C86  | -5.789811943  | 5.116107265  | 5.586481224  |
| C87  | -6.976718452  | 6.053329272  | 5.435839638  |
| C88  | -8.158038832  | 7.599793312  | 3.976226440  |
| C89  | -9.631411215  | 7.173451530  | 3.755130538  |
| C90  | -7.725863219  | 8.606864146  | 2.907376969  |
| C91  | -7.780053768  | 8.063682197  | 1.485922509  |
| C92  | -11.170418207 | 5.359618060  | 3.146088849  |
| C93  | -12.178087624 | 5.403104244  | 4.286836876  |
| C94  | -11.028274841 | 3.903394446  | 2.618636300  |
| C95  | -10.137898998 | 3.818911981  | 1.398138583  |
| C96  | -10.677979980 | 3.991317972  | 0.114433401  |
| C97  | -8.750314116  | 3.621797410  | 1.508735401  |
| C98  | -9.864476970  | 3.994455761  | -1.020513791 |
| C99  | -7.916362169  | 3.651001894  | 0.387176144  |
| C100 | -8.485665984  | 3.842999386  | -0.867774627 |
| C101 | 8.485515065   | 4.586488803  | -4.355998688 |
| C102 | 7.193634432   | 4.070941859  | -4.964275402 |
| C103 | 4.752565683   | 3.798970297  | -4.582333651 |
| C104 | 3.745717525   | 4.944335471  | -4.752909860 |
| C105 | 2.474101146   | 6.675263393  | -3.556806025 |
| C106 | 2.709702984   | 7.718373448  | -2.468146021 |
| C107 | 3.642981876   | 8.329888223  | -0.304797874 |
| C108 | 4.455746258   | 9.553270451  | -0.680001991 |
| C109 | 3.606126141   | 3.144723632  | -8.941371625 |
| C110 | 2.092440490   | 3.378581572  | -9.010677382 |
| C111 | 3.914046555   | 1.923316969  | -8.045811183 |
| C112 | 5.354969083   | 1.423856070  | -8.262909721 |
| C113 | 5.733888548   | 0.419720892  | -7.198400574 |
| C114 | 0.119966980   | 4.402671853  | -7.995727784 |
| C115 | -0.123498025  | 5.838751303  | -7.575579211 |
| C116 | -0.777828081  | 3.360189497  | -7.283288634 |
| C117 | -0.257824770  | 3.108239653  | -5.898343447 |
| C118 | -0.588667926  | 3.971919651  | -4.842007784 |
| C119 | 0.733502629   | 2.131955543  | -5.696867258 |
| C120 | 0.137298045   | 3.929918562  | -3.647865931 |
| C121 | 1.448120785   | 2.084398188  | -4.500644466 |
| C122 | 1.184470648   | 3.018781450  | -3.492811358 |
| C123 | 11.143291451  | 1.151437910  | -0.082400992 |
| C124 | 11.660450070  | 0.729117147  | 1.302200324  |
| C125 | 10.320499751  | 0.032786920  | -0.737419801 |
| C126 | 9.549200040   | 0.415064733  | -1.960385101 |
| C127 | 10.041151430  | 0.752813965  | -3.203347750 |
| C128 | 7.835715494   | 0.592293824  | -3.314966441 |
| C129 | 12.644936033  | -0.950960172 | 2.743253601  |
| C130 | 13.646413562  | 0.011265232  | 3.340941794  |
| C131 | 4.884138861   | -4.256042156 | -2.364395477 |
| C132 | 5.887444493   | -4.238072483 | -1.195196947 |
| C133 | 7.101858238   | -3.285835248 | -1.378391884 |
| C134 | 8.159749601   | -3.914196900 | -2.316108812 |

|       |              |               |              |
|-------|--------------|---------------|--------------|
| C135  | 9.468937927  | -3.128951003  | -2.420367086 |
| C136  | 10.569366028 | -3.831860336  | -3.245973186 |
| C137  | 7.754575143  | -3.004542837  | -0.018013234 |
| C138  | 3.679251397  | 1.859248897   | 0.773678946  |
| Fe139 | 5.143640448  | 2.119026648   | -0.540372420 |
| Fe140 | 1.372249823  | 1.806310130   | 0.875807312  |
| Fe141 | 3.615169256  | 2.492931625   | 2.682359931  |
| Fe142 | 3.517857579  | 3.761827014   | 0.439483625  |
| Fe143 | 1.692646100  | 4.220772030   | 2.348246764  |
| Fe144 | 5.188680998  | 0.807126129   | 1.603041307  |
| Fe145 | 3.181039814  | 0.026335792   | -0.116613838 |
| H146  | 0.289438972  | -7.093215499  | -7.025658159 |
| H147  | -0.029654349 | -5.606037491  | -7.618972835 |
| H148  | -4.124835257 | -6.855820826  | -7.532729522 |
| H149  | -2.078324629 | -6.339676411  | -8.612521767 |
| H150  | -1.722260123 | -7.978944040  | -8.079442038 |
| H151  | -4.353073183 | -5.435786930  | -5.110673723 |
| H152  | -3.798295149 | -8.901428950  | -5.481741885 |
| H153  | -5.617536803 | -6.442763346  | -5.843921002 |
| H154  | -3.596599161 | -10.562799469 | -3.865110509 |
| H155  | -1.734293371 | -8.150263026  | -3.982058772 |
| H156  | -4.744250199 | -9.677552932  | -2.833246974 |
| H157  | -2.191065784 | -4.124796960  | -0.772669434 |
| H158  | -2.358014487 | -6.052060606  | -2.871516691 |
| H159  | 0.123717198  | -7.449200163  | -2.770642753 |
| H160  | -5.839505865 | -6.183449866  | 1.366632928  |
| H161  | -4.557634497 | -6.854934017  | -1.137066948 |
| H162  | -0.251967235 | -8.603875595  | -1.470357086 |
| H163  | -3.558641610 | -4.401683186  | -1.866178487 |
| H164  | -3.470282928 | -8.819862200  | 0.573075547  |
| H165  | -6.018486813 | -7.708270823  | 0.457807633  |
| H166  | -0.447659817 | -4.495116810  | 0.474863297  |
| H167  | -0.383677045 | -2.819329294  | -0.107784717 |
| H168  | 0.830987966  | -3.442039391  | 1.048690565  |
| H169  | -2.155640250 | -3.311600841  | 1.663903187  |
| H170  | -2.593466570 | -10.413031084 | 2.012209222  |
| H171  | -4.502962539 | -1.815194944  | 3.034828021  |
| H172  | -4.016761127 | -5.933481637  | 4.707537669  |
| H173  | -6.496040102 | -3.828858150  | 6.352434741  |
| H174  | -1.394918941 | -0.956677953  | 1.330741474  |
| H175  | -0.120517904 | -1.165907348  | 2.543811853  |
| H176  | 3.561049661  | 0.421483178   | 9.868599375  |
| H177  | -6.216814373 | -1.532916739  | 3.388084147  |
| H178  | -7.345505409 | -2.661560398  | 5.313740016  |
| H179  | -4.967810510 | -0.885448046  | 4.480480185  |
| H180  | -6.125754760 | -2.091251213  | 6.477569010  |
| H181  | -5.595192623 | -3.867479388  | 4.022146577  |
| H182  | -3.565938934 | -2.510604994  | 5.881095160  |
| H183  | -3.286022764 | -3.904104032  | 3.307187711  |
| H184  | -1.824928884 | -1.257699679  | 3.016692105  |
| H185  | -1.691432462 | 3.062094708   | 2.963597258  |
| H186  | -2.974076088 | 1.903321764   | 3.415899212  |
| H187  | -2.408791765 | 2.581239608   | 5.391719307  |
| H188  | -2.490937622 | 0.496393008   | 7.084372828  |
| H189  | -0.001424876 | 2.758364702   | 5.984528784  |
| H190  | 2.417191114  | 2.366077980   | 6.362273627  |
| H191  | 1.489137482  | -1.280948521  | 8.477157985  |
| H192  | -1.470798753 | -5.701481712  | 2.526841370  |
| H193  | 1.064414490  | -7.644624248  | 2.098213695  |
| H194  | 0.638363679  | -8.072963593  | 3.769977940  |
| H195  | -1.231039092 | -7.807856566  | 1.485519537  |
| H196  | -3.594510616 | -9.776864322  | 3.340090169  |
| H197  | -0.924175638 | -0.912804244  | 8.049922475  |
| H198  | 0.291648979  | -3.515858684  | 3.492061828  |
| H199  | -5.050715537 | -7.052138822  | 7.029747374  |
| H200  | -3.889905867 | -7.843268324  | 5.936364659  |
| H201  | -2.047119130 | -6.464282778  | 7.404822708  |
| H202  | 10.793254450 | -4.707834713  | 7.358697522  |
| H203  | 4.090436134  | -1.726224043  | -5.996941660 |
| H204  | 5.721662824  | -2.357374818  | -2.484176969 |
| H205  | 5.420931113  | 0.928933241   | -9.241798574 |
| H206  | 6.054647112  | 2.271444464   | -8.254112074 |
| H207  | 3.213862614  | 1.102129525   | -8.266196315 |
| H208  | 0.728401028  | 6.529554283   | -7.777940520 |
| H209  | 3.871644418  | 2.867259117   | -9.973294077 |
| H210  | -0.094258909 | -0.905089583  | -4.559366858 |
| H211  | 0.901522529  | -3.717012104  | -5.271728442 |
| H212  | 2.125672329  | 4.455622360   | -7.233898377 |
| H213  | -0.175893672 | 4.394201913   | -9.065691322 |
| H214  | 4.232553948  | 4.641517801   | -7.643009944 |
| H215  | 3.712246286  | -2.630924123  | -4.532795888 |
| H216  | 3.748225632  | 2.200675436   | -6.993006123 |

|      |               |              |              |
|------|---------------|--------------|--------------|
| H217 | 5.323775349   | 4.262828755  | -8.816602749 |
| H218 | -1.386627329  | -2.229408141 | -7.724848788 |
| H219 | -0.663355855  | -2.308169433 | -3.636952661 |
| H220 | 6.627176668   | 1.878566833  | -6.228213182 |
| H221 | 1.543938343   | -2.911885243 | -3.849039223 |
| H222 | -5.385615599  | -1.472230588 | 0.254509701  |
| H223 | -2.751279885  | -1.394962737 | -0.793859142 |
| H224 | -7.462527336  | -4.331840277 | -2.884510272 |
| H225 | -5.316345245  | -2.837531194 | -4.334852144 |
| H226 | -8.205556135  | -0.879390985 | -1.737081994 |
| H227 | -12.859509608 | 0.477474649  | 0.381318822  |
| H228 | -9.988773248  | -2.130000934 | 0.516022681  |
| H229 | -10.817759427 | -1.182892962 | -1.919249591 |
| H230 | -9.636438984  | 0.894876684  | 0.025667897  |
| H231 | -13.882088063 | 2.725347467  | -3.056796099 |
| H232 | -5.409824888  | 1.028155831  | 0.099123378  |
| H233 | -5.931740802  | 0.932384879  | -1.588774768 |
| H234 | -14.542527966 | 2.071762317  | -0.680602034 |
| H235 | -9.975764690  | 0.256424656  | -2.493884083 |
| H236 | -6.004459327  | -1.330389847 | -2.632768732 |
| H237 | -5.760733935  | -4.778944554 | -2.821075548 |
| H238 | -7.870823868  | -1.261752039 | -6.202499461 |
| H239 | -1.428377686  | 2.245115965  | -2.527413343 |
| H240 | -7.019256446  | -2.589981739 | -7.012413203 |
| H241 | 4.090641170   | 2.750997853  | 9.956629277  |
| H242 | 3.004676583   | 2.621948305  | 8.742401584  |
| H243 | -2.219777988  | 5.308914464  | 2.456524434  |
| H244 | -4.045518927  | 3.186677845  | 1.841451088  |
| H245 | -4.058989716  | 5.581350227  | 4.463836717  |
| H246 | -4.003713906  | 2.454884319  | -2.093606431 |
| H247 | -5.144830794  | 3.251603353  | -3.682417653 |
| H248 | -5.215845120  | 3.247960354  | -5.930674987 |
| H249 | -6.050555633  | 3.507331262  | -2.396367039 |
| H250 | -3.073501084  | 2.057319607  | -5.840232920 |
| H251 | -4.365472091  | 1.468824059  | -6.934467530 |
| H252 | -6.731867891  | 9.005921738  | 3.152894798  |
| H253 | -8.439254831  | 9.444245408  | 2.952583222  |
| H254 | -5.863501258  | 8.760997413  | 1.136259977  |
| H255 | -6.672470767  | 7.928583351  | -0.191178548 |
| H256 | -6.209218323  | 9.257550994  | -2.732596520 |
| H257 | -2.813670383  | 6.419034205  | -3.555306953 |
| H258 | -10.303750684 | 4.121456039  | -2.013690951 |
| H259 | -8.290567309  | 3.433680493  | 2.483087377  |
| H260 | -7.077975232  | 5.883445517  | -2.110423615 |
| H261 | -1.295729184  | 6.440021716  | 0.329763869  |
| H262 | -1.783722672  | 7.588259809  | 2.290452423  |
| H263 | -2.888087553  | 5.111628478  | -1.178071371 |
| H264 | -5.030308177  | -1.448144925 | -6.738831037 |
| H265 | -2.330235526  | 10.448084407 | 3.654614524  |
| H266 | -2.410418490  | -0.258248621 | -6.423899556 |
| H267 | -1.781572022  | 7.910790119  | -0.510666195 |
| H268 | -6.835815182  | 3.563766382  | 0.503624338  |
| H269 | -3.343083102  | 9.400232359  | 4.669270045  |
| H270 | -4.565443674  | 8.940548547  | -3.197497190 |
| H271 | -7.691142380  | 7.395934602  | -2.692170079 |
| H272 | -0.035404826  | -1.516869486 | -7.039052611 |
| H273 | -1.496854132  | -3.368142703 | -5.724518704 |
| H274 | -11.755454935 | 4.122710258  | -0.004156291 |
| H275 | -3.869408299  | 0.499879969  | -4.063776997 |
| H276 | -4.091260354  | 7.709565506  | 0.404117342  |
| H277 | -3.074515393  | 7.829519783  | -2.529489182 |
| H278 | -1.431409565  | 5.815541693  | -1.864746363 |
| H279 | -4.869430038  | 5.407926421  | -2.554840036 |
| H280 | -6.181789555  | 4.114363304  | 5.817771034  |
| H281 | -6.517074247  | 6.302765639  | 3.458262373  |
| H282 | -8.198257163  | 8.142903248  | 4.933790485  |
| H283 | -5.209167910  | 5.464941232  | 6.451750639  |
| H284 | -9.052603316  | 5.257443460  | 3.437815126  |
| H285 | 8.282452782   | 5.461073232  | -3.720633998 |
| H286 | 8.837258627   | 3.777024819  | -3.683272310 |
| H287 | 10.490738955  | 2.016591569  | 0.107715973  |
| H288 | 10.366673715  | 5.049173279  | -4.992276658 |
| H289 | 9.499940539   | 4.171605362  | -6.070715867 |
| H290 | 1.025199371   | 5.126117078  | 5.011444294  |
| H291 | -0.942953618  | 6.120481880  | 7.099612027  |
| H292 | -0.506169737  | 9.082062310  | 4.081646104  |
| H293 | -0.743133111  | 4.843500761  | 4.916805919  |
| H294 | -0.169131099  | 7.547756268  | 7.316496085  |
| H295 | 4.182636714   | 7.814871649  | 0.505306207  |
| H296 | 0.672638057   | 7.561857059  | 5.115982630  |
| H297 | 6.269726655   | -6.679900610 | 4.060558337  |
| H298 | 8.902472730   | -5.245585018 | 3.403937449  |

|       |               |               |              |
|-------|---------------|---------------|--------------|
| H299  | 3.933692517   | 6.475934421   | -1.314847947 |
| H300  | 2.340285088   | -0.785322234  | 5.251706870  |
| H301  | 2.519357380   | 7.189090426   | -4.525321256 |
| H302  | 2.216859128   | 1.324084499   | -4.345636596 |
| H303  | 1.433467791   | 6.326808443   | -3.436517941 |
| H304  | 4.162829775   | -4.955933828  | 4.214948096  |
| H305  | 3.677537415   | 5.074976245   | -2.726500028 |
| H306  | 4.751594303   | -4.428099020  | 2.628179653  |
| H307  | 6.691089961   | -5.880459950  | 2.529533662  |
| H308  | 6.918556493   | -3.679928303  | 3.782313769  |
| H309  | 6.341143896   | -4.474063935  | 5.254412568  |
| H310  | -0.767611946  | 2.440531719   | -7.886991508 |
| H311  | 8.276076492   | -8.172969155  | 3.532648249  |
| H312  | 9.923437960   | -8.951923349  | 1.063377862  |
| H313  | 1.758419417   | 2.992798976   | -2.568616190 |
| H314  | 9.744967140   | -10.264071922 | 3.662776626  |
| H315  | 9.102532880   | -10.707356217 | 2.221745756  |
| H316  | 5.035703861   | -2.160119265  | 3.580762910  |
| H317  | -0.092415723  | 4.620120471   | -2.833148518 |
| H318  | 0.962880186   | 1.421663211   | -6.495208212 |
| H319  | 12.185467689  | -3.575413665  | 0.323724926  |
| H320  | 10.994732198  | -0.796969578  | -1.010384077 |
| H321  | 9.823622717   | -3.766773855  | 1.319686565  |
| H322  | 12.412611186  | -3.426287184  | -1.211185794 |
| H323  | 5.115868033   | 9.422968662   | -1.571190149 |
| H324  | 7.788297260   | -1.573937528  | 2.218930252  |
| H325  | 6.236377252   | -5.259155449  | -0.998272333 |
| H326  | 6.177661730   | 4.715830758   | -3.311835284 |
| H327  | 8.369888876   | -4.921913458  | -1.924514198 |
| H328  | 8.973059649   | 1.031306351   | -5.037344608 |
| H329  | 6.841669978   | 0.568250880   | -3.742716677 |
| H330  | 11.220651276  | -9.120319085  | 2.252122273  |
| H331  | 3.815543408   | -0.440432749  | 4.415546295  |
| H332  | 9.236278737   | -2.265097806  | 3.944385625  |
| H333  | 7.558551104   | -0.516202970  | 3.334093885  |
| H334  | 9.584321685   | -4.219590334  | 5.220785443  |
| H335  | 2.272159252   | -4.233187341  | 4.722532456  |
| H336  | 9.275466907   | -2.153449403  | -2.893970197 |
| H337  | 9.872504163   | -2.924328461  | -1.418010503 |
| H338  | 7.711551335   | -4.043590231  | -3.314015425 |
| H339  | 4.414563915   | 3.099211016   | -3.801523991 |
| H340  | -1.373956868  | 4.717259886   | -4.987060260 |
| H341  | -1.801307024  | 3.764590093   | -7.277559244 |
| H342  | 5.306392269   | -3.914238378  | -0.315592193 |
| H343  | 10.364407948  | -3.147899522  | 3.339161746  |
| H344  | 10.775197469  | -4.808143657  | 1.943182802  |
| H345  | 1.554743489   | -2.897127280  | 5.491796845  |
| H346  | 11.057763119  | 0.894319008   | -3.551979262 |
| H347  | 9.619149391   | -0.374974323  | 0.000674170  |
| H348  | 4.826816524   | 3.267565165   | -5.533945430 |
| H349  | 2.670199627   | 8.651988990   | 0.094643691  |
| H350  | 3.830649811   | -0.782686652  | 7.737782356  |
| H351  | 4.204230521   | 0.735300689   | 6.885580255  |
| H352  | 12.738511182  | 2.371068329   | -0.511657207 |
| H353  | 12.913734160  | 0.849357754   | -1.090762453 |
| H354  | 13.156276121  | -1.918153801  | 2.610492359  |
| H355  | 12.221838834  | -1.195111933  | 0.667113775  |
| H356  | 14.221313693  | 0.616784808   | 2.600213284  |
| H357  | 11.815232411  | -1.110748914  | 3.450343040  |
| H358  | 6.251295942   | 1.216503380   | 8.561465539  |
| H359  | -11.733344686 | 5.435255478   | 5.309313218  |
| H360  | 9.486719227   | -5.859426372  | 7.745221295  |
| H361  | 7.957952741   | -3.557475907  | 7.576026183  |
| H362  | -11.556197071 | 5.997754857   | 2.333608542  |
| H363  | -10.636111091 | 3.268808418   | 3.428979105  |
| H364  | -12.039252653 | 3.544304942   | 2.380180503  |
| H365  | 3.410111233   | -0.963653176  | -1.230713178 |
| H366  | -8.175447185  | 3.839379896   | -2.791856288 |
| H367  | 1.048420292   | -1.227056581  | -0.069819421 |
| H368  | 2.360930732   | -0.310555438  | 2.259992793  |
| H369  | 2.183215426   | -2.081028251  | 0.961550937  |
| H370  | -0.687405909  | 0.049167726   | -1.592408386 |
| Mo371 | 6.498583059   | -0.281791477  | -0.562256075 |
| N372  | 1.903586773   | -0.091795053  | 1.365913608  |
| N373  | 1.878329929   | -1.202434602  | 0.538306503  |
| N374  | -0.167519220  | -6.603269187  | -7.798611473 |
| N375  | -3.710251503  | -6.781037066  | -6.606775367 |
| N376  | -4.045713277  | -8.642046504  | -4.529805882 |
| N377  | -1.681930274  | -8.467131048  | -3.012723813 |
| N378  | -2.154629750  | -5.918927004  | -1.883601138 |
| N379  | -4.454630407  | -6.497555729  | -0.184666085 |
| N380  | -3.602773218  | -8.646962922  | 1.572386031  |

|      |               |              |              |
|------|---------------|--------------|--------------|
| N381 | -0.972751811  | -7.983799313 | 2.460655899  |
| N382 | -0.684274985  | -5.253450249 | 2.996538000  |
| N383 | -2.946588127  | -3.599829867 | 4.220036068  |
| N384 | -3.951013356  | -5.790069908 | 5.714437274  |
| N385 | 9.277558904   | -9.904360077 | 2.827776399  |
| N386 | 8.770703180   | -7.304952675 | 3.303233258  |
| N387 | 4.436123455   | -2.879017636 | 3.994431142  |
| N388 | 2.420683135   | -3.301801122 | 5.135714300  |
| N389 | 3.060373004   | -1.123451853 | 4.614952923  |
| N390 | 9.323121130   | -4.997892953 | 5.867133466  |
| N391 | -1.061764554  | -1.644675763 | -6.951868038 |
| N392 | 3.385284388   | -2.158695789 | -5.391606502 |
| N393 | -3.074668932  | -0.553796293 | -5.687746059 |
| N394 | -5.766743257  | -1.226394729 | -6.071937391 |
| N395 | -6.256143278  | -3.189554487 | -4.119140069 |
| N396 | -6.035862803  | -1.773262336 | -1.709381184 |
| N397 | -3.402087488  | 1.630258587  | -1.846511883 |
| N398 | -1.719759940  | 0.275937180  | -1.700705540 |
| N399 | -8.367132500  | -0.586381850 | -0.776364188 |
| N400 | -12.175774166 | 1.448323632  | -2.732042223 |
| N401 | -13.708937922 | 1.734305363  | -1.154182400 |
| N402 | 3.960884340   | 2.376607227  | 9.013357983  |
| N403 | -0.107748033  | 6.649604019  | 6.828769941  |
| N404 | -1.420148644  | 8.672323360  | 4.257631271  |
| N405 | -2.697747235  | 7.887658874  | 1.938312152  |
| N406 | -4.639916977  | 6.418918348  | -2.546826146 |
| N407 | -5.463578814  | 8.586729668  | -2.889830696 |
| N408 | -6.904765320  | 6.869444336  | -2.321285548 |
| N409 | -3.196935286  | 5.063842451  | 2.225534489  |
| N410 | -4.922759377  | 5.032554597  | 4.426132626  |
| N411 | -7.215935287  | 6.514190326  | 4.169963526  |
| N412 | -6.728764376  | 8.422183214  | 0.697815145  |
| N413 | -9.867551770  | 5.849044325  | 3.579958992  |
| N414 | 9.437504132   | 4.951601150  | -5.408943616 |
| N415 | 6.077763819   | 4.301954199  | -4.241723963 |
| N416 | 3.387073383   | 5.547066507  | -3.598547252 |
| N417 | 3.491170319   | 7.394517068  | -1.405993637 |
| N418 | 4.325924316   | 4.386740370  | -8.633239313 |
| N419 | 1.539899103   | 4.108840405  | -8.000106817 |
| N420 | 12.233035354  | 1.605324404  | -0.966266239 |
| N421 | 8.160262231   | 0.332415982  | -2.048898259 |
| N422 | 8.948824983   | 0.858704118  | -4.035891594 |
| N423 | 12.181299471  | -0.519882968 | 1.435992820  |
| N424 | -1.547101430  | 1.750196254  | 0.901456248  |
| N425 | -0.420141323  | 1.756694173  | 0.906781840  |
| O426 | -1.792864412  | -6.471590326 | -5.413633314 |
| O427 | -4.808698172  | -6.984552213 | -3.160373366 |
| O428 | -2.771845434  | -9.476213062 | -1.276260394 |
| O429 | -0.947826793  | -6.615615280 | -0.083199842 |
| O430 | -3.628487058  | -4.860089148 | 1.156469107  |
| O431 | -4.729150906  | -7.505573003 | 3.197753306  |
| O432 | -1.328703179  | -9.276259287 | 4.324892995  |
| O433 | 1.450977720   | -5.593875138 | 3.787497032  |
| O434 | -1.109439662  | -3.109737196 | 5.499344452  |
| O435 | -4.003180782  | -4.376425851 | 7.491954586  |
| O436 | -3.155356098  | -7.567315358 | 8.718006616  |
| O437 | 10.708810183  | -6.593550492 | 2.260566238  |
| O438 | 8.268540383   | -7.024430612 | 6.109462555  |
| O439 | 9.362340731   | -3.291804105 | 9.031453384  |
| O440 | -3.352477459  | -2.288745689 | -4.210613575 |
| O441 | 1.734212028   | -1.353959631 | -6.733969789 |
| O442 | -6.302646287  | -0.051866721 | -4.188026474 |
| O443 | -5.037030979  | 2.547805830  | -5.278073322 |
| O444 | -8.479243777  | -3.216815205 | -4.692541695 |
| O445 | -6.427912232  | -3.669351521 | -0.495276490 |
| O446 | -7.454833266  | -0.348480463 | 1.302451011  |
| O447 | -10.999009347 | -0.711036160 | 1.578894791  |
| O448 | 6.011272639   | -0.312228109 | 9.894929377  |
| O449 | -1.935735541  | 1.208560659  | 6.717142781  |
| O450 | -2.581800714  | 6.957422799  | 5.208728085  |
| O451 | -4.440901119  | 9.341637193  | 2.300646050  |
| O452 | -4.982550031  | 5.418014035  | 0.839696413  |
| O453 | -5.825442570  | 3.067040186  | 3.652428174  |
| O454 | -2.546356137  | 3.375101234  | 4.835961106  |
| O455 | -7.678688929  | 6.354649571  | 6.408301608  |
| O456 | -10.536430189 | 8.018759543  | 3.798471055  |
| O457 | -8.737418337  | 7.396904069  | 1.069239874  |
| O458 | -13.384984741 | 5.364924746  | 4.107165948  |
| O459 | -7.628892896  | 3.923469121  | -1.986441278 |
| O460 | 7.202193530   | 3.437263843  | -6.047283103 |
| O461 | 3.328248899   | 5.295471023  | -5.875395473 |
| O462 | 2.139307712   | 8.817761349  | -2.555751204 |

|                                                                                                                                                                                                                                                          |              |              |                                    |              |
|----------------------------------------------------------------------------------------------------------------------------------------------------------------------------------------------------------------------------------------------------------|--------------|--------------|------------------------------------|--------------|
|                                                                                                                                                                                                                                                          | O463         | 4.435176801  | 10.594275216                       | -0.043575768 |
|                                                                                                                                                                                                                                                          | O464         | 1.405574368  | 2.908417045                        | -9.933298864 |
|                                                                                                                                                                                                                                                          | O465         | 5.409632061  | -0.761242873                       | -7.236150014 |
|                                                                                                                                                                                                                                                          | O466         | 6.420728716  | 0.898317425                        | -6.137815014 |
|                                                                                                                                                                                                                                                          | O467         | -1.173182832 | 6.252898718                        | -7.104896906 |
|                                                                                                                                                                                                                                                          | O468         | 11.647826395 | 1.520634907                        | 2.265902771  |
|                                                                                                                                                                                                                                                          | O469         | 13.879872650 | 0.081034562                        | 4.539788255  |
|                                                                                                                                                                                                                                                          | O470         | 4.767579015  | -3.130074827                       | -3.021735455 |
|                                                                                                                                                                                                                                                          | O471         | 4.205319779  | -5.273444702                       | -2.583708594 |
|                                                                                                                                                                                                                                                          | O472         | 11.764325964 | -3.776751731                       | -2.786248191 |
|                                                                                                                                                                                                                                                          | O473         | 10.226293103 | -4.382889829                       | -4.329101372 |
|                                                                                                                                                                                                                                                          | O474         | 7.800001162  | -1.754974315                       | 0.373404217  |
|                                                                                                                                                                                                                                                          | O475         | 8.231488691  | -3.945527910                       | 0.642790308  |
|                                                                                                                                                                                                                                                          | O476         | 6.616656830  | -2.034732260                       | -1.911659679 |
|                                                                                                                                                                                                                                                          | O477         | 10.019839657 | -2.807028093                       | 4.210377923  |
|                                                                                                                                                                                                                                                          | O478         | 7.719023720  | -1.469059983                       | 3.201744274  |
|                                                                                                                                                                                                                                                          | O479         | -5.133036037 | 3.603070750                        | -2.751257322 |
|                                                                                                                                                                                                                                                          | O480         | 12.862363397 | -3.278961629                       | -0.324340523 |
|                                                                                                                                                                                                                                                          | O481         | 10.720124154 | -3.839780957                       | 1.742838221  |
|                                                                                                                                                                                                                                                          | S482         | 0.106828661  | 5.740041009                        | 2.825406820  |
|                                                                                                                                                                                                                                                          | S483         | 1.304718688  | 3.999065581                        | 0.148813638  |
|                                                                                                                                                                                                                                                          | S484         | 4.688562063  | 0.448646572                        | -1.945193308 |
|                                                                                                                                                                                                                                                          | S485         | 1.459279785  | 2.200304268                        | 3.210966124  |
|                                                                                                                                                                                                                                                          | S486         | 1.379855798  | 0.869588380                        | -1.254325856 |
|                                                                                                                                                                                                                                                          | S487         | 5.045932549  | 4.269094141                        | -1.061517449 |
|                                                                                                                                                                                                                                                          | S488         | 4.841198638  | -1.269746157                       | 0.892773225  |
|                                                                                                                                                                                                                                                          | S489         | 3.882364815  | 4.708989771                        | 2.448106363  |
|                                                                                                                                                                                                                                                          | S490         | 7.012191449  | 1.676786530                        | 0.639464542  |
|                                                                                                                                                                                                                                                          | S491         | 5.109207711  | 1.289098388                        | 3.754305418  |
|                                                                                                                                                                                                                                                          | end          |              |                                    |              |
| <b>Fe2-brNH-NH2-Fe6</b><br><b>2N2 dissociated</b><br><b>35, S=1</b><br><br><b>Fe( 139) -1.875</b><br><b>Fe( 140) 1.120</b><br><b>Fe( 141) -2.327</b><br><b>Fe( 142) 2.091</b><br><b>Fe( 143) 1.184</b><br><b>Fe( 144) 2.512</b><br><b>Fe( 145) 0.170</b> |              |              | <b>bm626x2nh6nh22n2xdt1b.car 4</b> |              |
| 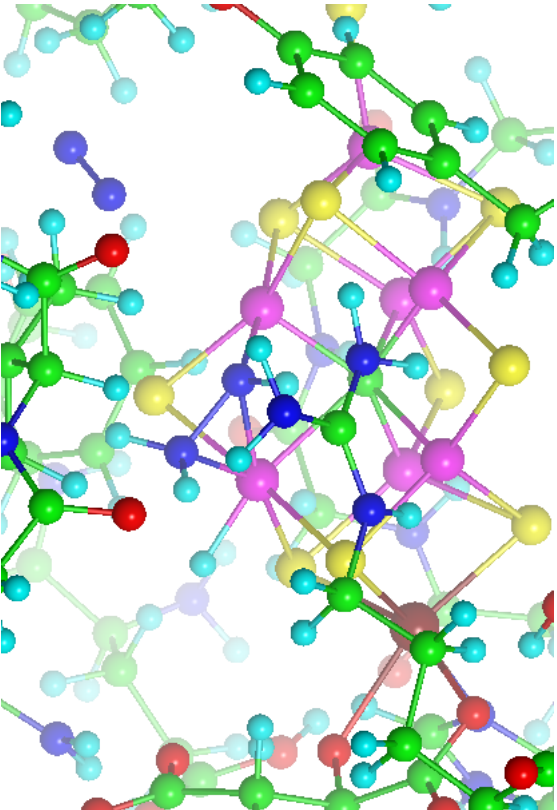                                                                                                                                                                      | C1           | -2.343019338 | -6.668544132                       | -6.496106681 |
|                                                                                                                                                                                                                                                          | C2           | -1.579806454 | -6.907569059                       | -7.804882030 |
|                                                                                                                                                                                                                                                          | C3           | -4.572994182 | -6.435987093                       | -5.484423185 |
|                                                                                                                                                                                                                                                          | C4           | -4.484121999 | -7.380349959                       | -4.289711622 |
|                                                                                                                                                                                                                                                          | C5           | -3.830394076 | -9.576007779                       | -3.437101431 |
|                                                                                                                                                                                                                                                          | C6           | -2.710926435 | -9.164613149                       | -2.474654913 |
|                                                                                                                                                                                                                                                          | C7           | -0.680547644 | -7.853677217                       | -2.144336278 |
|                                                                                                                                                                                                                                                          | C8           | -1.267151280 | -6.739976214                       | -1.274916235 |
|                                                                                                                                                                                                                                                          | C9           | -2.880518286 | -4.884965790                       | -1.157428108 |
|                                                                                                                                                                                                                                                          | C10          | -3.682708528 | -5.409847767                       | 0.042915441  |
|                                                                                                                                                                                                                                                          | C11          | -5.291632906 | -7.006193625                       | 0.890154922  |
|                                                                                                                                                                                                                                                          | C12          | -4.509192541 | -7.725425277                       | 1.996242932  |
|                                                                                                                                                                                                                                                          | C13          | -2.911070779 | -9.495825170                       | 2.529311151  |
|                                                                                                                                                                                                                                                          | C14          | -1.669553965 | -8.896903840                       | 3.196961917  |
|                                                                                                                                                                                                                                                          | C15          | 0.319054924  | -7.492404707                       | 2.891862503  |
|                                                                                                                                                                                                                                                          | C16          | 0.397449724  | -6.019700829                       | 3.274352723  |
|                                                                                                                                                                                                                                                          | C17          | -0.725273785 | -3.806674729                       | 3.205838366  |
|                                                                                                                                                                                                                                                          | C18          | -1.604048712 | -3.467572519                       | 4.421483462  |
|                                                                                                                                                                                                                                                          | C19          | -1.127948929 | -3.033113975                       | 1.934958808  |
|                                                                                                                                                                                                                                                          | C20          | -1.108051519 | -1.528051892                       | 2.209699734  |
|                                                                                                                                                                                                                                                          | C21          | -0.235732820 | -3.463899295                       | 0.769175153  |
|                                                                                                                                                                                                                                                          | C22          | -3.917705571 | -3.358876640                       | 5.282414707  |
|                                                                                                                                                                                                                                                          | C23          | -3.958471005 | -4.542788149                       | 6.262587041  |
|                                                                                                                                                                                                                                                          | C24          | -5.306181663 | -3.025562691                       | 4.683708480  |
|                                                                                                                                                                                                                                                          | C25          | -6.375417927 | -2.900282957                       | 5.774218346  |
|                                                                                                                                                                                                                                                          | C26          | -5.242050472 | -1.742448055                       | 3.845879911  |
|                                                                                                                                                                                                                                                          | C27          | -4.048738965 | -6.950744467                       | 6.562859398  |
|                                                                                                                                                                                                                                                          | C28          | -3.001654729 | -6.972464239                       | 7.656948850  |
|                                                                                                                                                                                                                                                          | C29          | 10.132183487 | -8.923676015                       | 2.135008269  |
|                                                                                                                                                                                                                                                          | C30          | 9.897199473  | -7.480860871                       | 2.584199423  |
|                                                                                                                                                                                                                                                          | C31          | 8.329077466  | -6.042738548                       | 3.890845754  |
|                                                                                                                                                                                                                                                          | C32          | 8.635918518  | -6.067569792                       | 5.401900162  |
| C33                                                                                                                                                                                                                                                      | 6.828518253  | -5.834434928 | 3.621483853                        |              |
| C34                                                                                                                                                                                                                                                      | 6.292854706  | -4.503614887 | 4.155168444                        |              |
| C35                                                                                                                                                                                                                                                      | 4.846800594  | -4.258750800 | 3.712743628                        |              |
| C36                                                                                                                                                                                                                                                      | 3.311462477  | -2.464282389 | 4.605651682                        |              |
| C37                                                                                                                                                                                                                                                      | 9.712725812  | -4.891491065 | 7.261479993                        |              |
| C38                                                                                                                                                                                                                                                      | 8.950447024  | -3.822945716 | 8.014264575                        |              |
| C39                                                                                                                                                                                                                                                      | -1.358856912 | -2.263297704 | -5.647047310                       |              |
| C40                                                                                                                                                                                                                                                      | -2.691760307 | -1.718092049 | -5.099214941                       |              |
| C41                                                                                                                                                                                                                                                      | -0.254845308 | -1.985990484 | -4.601578359                       |              |
| C42                                                                                                                                                                                                                                                      | 1.086351188  | -2.718532623 | -4.821855559                       |              |
| C43                                                                                                                                                                                                                                                      | 2.097107267  | -2.007827103 | -5.722662467                       |              |
| C44                                                                                                                                                                                                                                                      | -4.103295065 | 0.306101847  | -5.125512567                       |              |
| C45                                                                                                                                                                                                                                                      | -5.495026242 | -0.339112798 | -5.093993599                       |              |
| C46                                                                                                                                                                                                                                                      | -4.095962926 | 1.640562654  | -5.883774531                       |              |
| C47                                                                                                                                                                                                                                                      | -7.022911600 | -1.960239012 | -6.116857369                       |              |
| C48                                                                                                                                                                                                                                                      | -7.316930059 | -2.847050111 | -4.902091944                       |              |
| C49                                                                                                                                                                                                                                                      | -6.446217148 | -3.923980653 | -2.879494282                       |              |
| C50                                                                                                                                                                                                                                                      | -6.302886211 | -3.114090556 | -1.590059000                       |              |

|      |               |              |              |
|------|---------------|--------------|--------------|
| C51  | -5.950627368  | -0.938572155 | -0.526958250 |
| C52  | -7.331161358  | -0.632982876 | 0.105462653  |
| C53  | -5.323769064  | 0.427206926  | -0.840664456 |
| C54  | -3.901519701  | 0.456663543  | -1.302250752 |
| C55  | -2.830289892  | -0.398609867 | -1.208899056 |
| C56  | -2.106349463  | 1.466698033  | -2.171000007 |
| C57  | -9.687767973  | -0.116417367 | -0.392418665 |
| C58  | -10.262679428 | -1.053328084 | 0.668550673  |
| C59  | -10.574757404 | -0.131230343 | -1.659256233 |
| C60  | -11.822417959 | 0.702471231  | -1.617871241 |
| C61  | -12.771311377 | 0.868622540  | -0.627410692 |
| C62  | -13.311259656 | 2.055018035  | -2.419169406 |
| C63  | 4.099002065   | 0.917119023  | 9.047822057  |
| C64  | 5.571345459   | 0.578499571  | 9.190009539  |
| C65  | 3.615619736   | 0.296929240  | 7.711743189  |
| C66  | 2.143432371   | 0.522690696  | 7.458906506  |
| C67  | 1.174837582   | -0.380172089 | 7.935028013  |
| C68  | 1.696938876   | 1.652342323  | 6.749354691  |
| C69  | -0.188845121  | -0.174739861 | 7.701552710  |
| C70  | 0.338832681   | 1.877921081  | 6.520967332  |
| C71  | -0.602244671  | 0.958226015  | 6.990565067  |
| C72  | -0.137556209  | 6.898054788  | 5.383928003  |
| C73  | -1.484012223  | 7.506145333  | 4.948158487  |
| C74  | 0.100625822   | 5.578953327  | 4.659627136  |
| C75  | -2.608460113  | 9.411580287  | 3.854253050  |
| C76  | -3.336096244  | 8.872449998  | 2.620797478  |
| C77  | -3.270802696  | 7.135367588  | 0.834997590  |
| C78  | -3.888237232  | 5.795337534  | 1.313357481  |
| C79  | -2.140626528  | 6.919520452  | -0.198891459 |
| C80  | -2.418425943  | 6.071206390  | -1.445823305 |
| C81  | -3.212186719  | 6.742722945  | -2.580685647 |
| C82  | -5.651308968  | 7.286223768  | -2.606650412 |
| C83  | -3.705917821  | 3.801773833  | 2.732353263  |
| C84  | -4.935139818  | 3.952536738  | 3.636416903  |
| C85  | -2.648027434  | 2.987719719  | 3.516056472  |
| C86  | -5.793486234  | 5.130842195  | 5.597135378  |
| C87  | -6.983920656  | 6.061707026  | 5.442515247  |
| C88  | -8.161831434  | 7.603525110  | 3.977247905  |
| C89  | -9.634555835  | 7.175535668  | 3.755471944  |
| C90  | -7.728526484  | 8.608317792  | 2.907146160  |
| C91  | -7.780277716  | 8.062619265  | 1.486074130  |
| C92  | -11.171328988 | 5.360454745  | 3.144438506  |
| C93  | -12.177471698 | 5.401671483  | 4.286293238  |
| C94  | -11.026982223 | 3.904011120  | 2.616556964  |
| C95  | -10.135994122 | 3.818879052  | 1.396754080  |
| C96  | -10.674872408 | 3.992040383  | 0.112677704  |
| C97  | -8.748732548  | 3.622386758  | 1.508781364  |
| C98  | -9.860472387  | 3.995132812  | -1.021616739 |
| C99  | -7.913906356  | 3.650218505  | 0.387718238  |
| C100 | -8.481513516  | 3.842216283  | -0.868192718 |
| C101 | 8.485985908   | 4.589190110  | -4.356831367 |
| C102 | 7.192607481   | 4.073027097  | -4.961661236 |
| C103 | 4.752476145   | 3.799252785  | -4.577261820 |
| C104 | 3.746887087   | 4.944937372  | -4.747259137 |
| C105 | 2.471469982   | 6.675312907  | -3.555331671 |
| C106 | 2.703493324   | 7.723376264  | -2.470382143 |
| C107 | 3.639088135   | 8.343390389  | -0.308489909 |
| C108 | 4.459304553   | 9.562767713  | -0.680702288 |
| C109 | 3.607201596   | 3.144115685  | -8.933668164 |
| C110 | 2.093100327   | 3.378011712  | -9.003919429 |
| C111 | 3.914926113   | 1.922238055  | -8.039211470 |
| C112 | 5.356130346   | 1.422949245  | -8.259571048 |
| C113 | 5.736664582   | 0.419118184  | -7.196473588 |
| C114 | 0.120613611   | 4.401412070  | -7.989285470 |
| C115 | -0.124741817  | 5.837084616  | -7.570487530 |
| C116 | -0.773743771  | 3.357433908  | -7.274201723 |
| C117 | -0.251947126  | 3.105318737  | -5.890024316 |
| C118 | -0.582966618  | 3.966425854  | -4.831667875 |
| C119 | 0.737581751   | 2.126518570  | -5.689204674 |
| C120 | 0.136967782   | 3.915629339  | -3.633832149 |
| C121 | 1.445049499   | 2.069417513  | -4.488309382 |
| C122 | 1.176370512   | 2.996902436  | -3.475421346 |
| C123 | 11.145739743  | 1.155466048  | -0.080978722 |
| C124 | 11.661274445  | 0.731199975  | 1.303122919  |
| C125 | 10.319487566  | 0.038714688  | -0.737126080 |
| C126 | 9.549232407   | 0.419634563  | -1.961615975 |
| C127 | 10.0444643527 | 0.756043870  | -3.203942297 |
| C128 | 7.839468599   | 0.595352571  | -3.321093237 |
| C129 | 12.646377040  | -0.951765594 | 2.742937264  |
| C130 | 13.648163497  | 0.010121293  | 3.341734433  |
| C131 | 4.885715537   | -4.258453383 | -2.369265594 |
| C132 | 5.890425732   | -4.233331584 | -1.201189960 |



|       |              |               |              |
|-------|--------------|---------------|--------------|
| C133  | 7.102294799  | -3.279227760  | -1.387506374 |
| C134  | 8.163077332  | -3.911491777  | -2.320220231 |
| C135  | 9.471731528  | -3.127299676  | -2.424764319 |
| C136  | 10.572001070 | -3.830928681  | -3.249783555 |
| C137  | 7.757668794  | -2.984971795  | -0.029593094 |
| C138  | 3.683695781  | 1.875072830   | 0.783516563  |
| Fe139 | 5.064087527  | 2.051970956   | -0.555256686 |
| Fe140 | 1.784943445  | 1.737783350   | 0.820974594  |
| Fe141 | 3.557454283  | 2.446238446   | 2.692257103  |
| Fe142 | 3.522064857  | 3.794536606   | 0.504183118  |
| Fe143 | 1.675527763  | 4.260751875   | 2.316864864  |
| Fe144 | 5.221698128  | 0.805195571   | 1.614963318  |
| Fe145 | 3.247479747  | -0.110031842  | -0.243084575 |
| H146  | 0.299646509  | -7.087027026  | -7.026588245 |
| H147  | -0.021317008 | -5.599789909  | -7.619114707 |
| H148  | -4.117540162 | -6.851665803  | -7.524760687 |
| H149  | -2.073005313 | -6.333988078  | -8.606131406 |
| H150  | -1.719797059 | -7.970383588  | -8.067319798 |
| H151  | -4.349428301 | -5.429026402  | -5.102439456 |
| H152  | -3.792559430 | -8.894903150  | -5.478895183 |
| H153  | -5.612176373 | -6.435383872  | -5.838377668 |
| H154  | -3.594402291 | -10.559062948 | -3.865991616 |
| H155  | -1.729116544 | -8.150400615  | -3.979979896 |
| H156  | -4.741339409 | -9.673934377  | -2.832276849 |
| H157  | -2.194799256 | -4.121256120  | -0.776666292 |
| H158  | -2.351669346 | -6.048222300  | -2.872958142 |
| H159  | 0.126744337  | -7.447265199  | -2.768831782 |
| H160  | -5.837788012 | -6.181262115  | 1.366332502  |
| H161  | -4.556126853 | -6.857343637  | -1.136092144 |
| H162  | -0.247754307 | -8.599630792  | -1.466772979 |
| H163  | -3.560976710 | -4.401498277  | -1.870506005 |
| H164  | -3.471507519 | -8.820094921  | 0.573197283  |
| H165  | -6.019093140 | -7.706727595  | 0.457271282  |
| H166  | -0.454494781 | -4.494397652  | 0.464812324  |
| H167  | -0.386224137 | -2.813738246  | -0.107915211 |
| H168  | 0.827059369  | -3.445093813  | 1.044364190  |
| H169  | -2.157472828 | -3.316235124  | 1.665478842  |
| H170  | -2.596178381 | -10.414985585 | 2.013689801  |
| H171  | -4.504894065 | -1.808656081  | 3.032329390  |
| H172  | -4.008146447 | -5.926448732  | 4.705383001  |
| H173  | -6.493049727 | -3.827122494  | 6.353264200  |
| H174  | -1.403221828 | -0.972396173  | 1.310121283  |
| H175  | -0.115376209 | -1.160046874  | 2.506673256  |
| H176  | 3.556928425  | 0.420094348   | 9.874063709  |
| H177  | -6.218942313 | -1.533087524  | 3.387672321  |
| H178  | -7.345590237 | -2.662520719  | 5.313812981  |
| H179  | -4.969899571 | -0.881894753  | 4.478588972  |
| H180  | -6.126081837 | -2.090123732  | 6.477703699  |
| H181  | -5.593170119 | -3.864999397  | 4.022012768  |
| H182  | -3.566210181 | -2.504456449  | 5.879839865  |
| H183  | -3.284835448 | -3.897443918  | 3.305387784  |
| H184  | -1.817128161 | -1.249526485  | 3.004739776  |
| H185  | -1.666284487 | 3.122056632   | 3.037733272  |
| H186  | -2.936765753 | 1.928817817   | 3.439335814  |
| H187  | -2.421308080 | 2.588327769   | 5.429368361  |
| H188  | -2.487541876 | 0.500812920   | 7.079084801  |
| H189  | 0.007003304  | 2.748289333   | 5.954329860  |
| H190  | 2.425689253  | 2.355193429   | 6.340272999  |
| H191  | 1.488499156  | -1.270184861  | 8.486987218  |
| H192  | -1.471426356 | -5.697966428  | 2.526050307  |
| H193  | 1.062540576  | -7.645005051  | 2.094476880  |
| H194  | 0.637854436  | -8.074363869  | 3.766724336  |
| H195  | -1.233001669 | -7.806855605  | 1.484928759  |
| H196  | -3.595723145 | -9.776381418  | 3.340876338  |
| H197  | -0.924925633 | -0.903553470  | 8.050437966  |
| H198  | 0.294080393  | -3.515087526  | 3.488647007  |
| H199  | -5.046010041 | -7.048081057  | 7.023313688  |
| H200  | -3.881127313 | -7.836841707  | 5.930999720  |
| H201  | -2.043039289 | -6.459674679  | 7.406571240  |
| H202  | 10.793093379 | -4.705275540  | 7.358700613  |
| H203  | 4.095579994  | -1.727891988  | -5.997608874 |
| H204  | 5.725648840  | -2.359126392  | -2.500965795 |
| H205  | 5.420516545  | 0.928258256   | -9.239192401 |
| H206  | 6.056048887  | 2.271377897   | -8.251306229 |
| H207  | 3.215787616  | 1.101327585   | -8.260558864 |
| H208  | 0.725951970  | 6.528506978   | -7.773886059 |
| H209  | 3.872228997  | 2.868532203   | -9.966147890 |
| H210  | -0.083786652 | -0.898253270  | -4.551435029 |
| H211  | 0.904844430  | -3.712873579  | -5.266236159 |
| H212  | 2.126118290  | 4.455458334   | -7.227761459 |
| H213  | -0.175904968 | 4.391262178   | -9.059113815 |
| H214  | 4.234223091  | 4.640412511   | -7.635160237 |

|      |               |              |              |
|------|---------------|--------------|--------------|
| H215 | 3.718479371   | -2.631941866 | -4.533346139 |
| H216 | 3.750875246   | 2.198426213  | -6.986328000 |
| H217 | 5.324110117   | 4.262846586  | -8.810584599 |
| H218 | -1.380973794  | -2.225154045 | -7.713363504 |
| H219 | -0.652120185  | -2.300295286 | -3.625565599 |
| H220 | 6.628248948   | 1.877561433  | -6.226995669 |
| H221 | 1.553186201   | -2.909466389 | -3.844720120 |
| H222 | -5.377073725  | -1.469491599 | 0.246163538  |
| H223 | -2.762027826  | -1.404731147 | -0.814832818 |
| H224 | -7.464448815  | -4.336215143 | -2.885344561 |
| H225 | -5.316089685  | -2.840683871 | -4.332706317 |
| H226 | -8.202664522  | -0.875319532 | -1.737402872 |
| H227 | -12.854110811 | 0.481506197  | 0.382057841  |
| H228 | -9.978620741  | -2.124220227 | 0.519976505  |
| H229 | -10.810530166 | -1.179103867 | -1.917995286 |
| H230 | -9.629357748  | 0.899785948  | 0.027040226  |
| H231 | -13.881245354 | 2.722260931  | -3.059844088 |
| H232 | -5.398236567  | 1.030727778  | 0.078983282  |
| H233 | -5.944911361  | 0.928137317  | -1.599567458 |
| H234 | -14.540789824 | 2.071099818  | -0.681441076 |
| H235 | -9.969905960  | 0.260299017  | -2.491931612 |
| H236 | -6.007083247  | -1.338916503 | -2.638080807 |
| H237 | -5.762658863  | -4.784454745 | -2.822398438 |
| H238 | -7.870204500  | -1.265851687 | -6.202668046 |
| H239 | -1.442499509  | 2.209307361  | -2.609280295 |
| H240 | -7.019269433  | -2.595172772 | -7.012732745 |
| H241 | 4.085677698   | 2.750458452  | 9.964312202  |
| H242 | 3.004131813   | 2.621720167  | 8.746027752  |
| H243 | -2.210199165  | 5.330579150  | 2.463722364  |
| H244 | -4.039105736  | 3.205780944  | 1.871616930  |
| H245 | -4.059800602  | 5.600771534  | 4.482024367  |
| H246 | -4.013557769  | 2.436882615  | -2.147557299 |
| H247 | -5.147820400  | 3.261183915  | -3.688431643 |
| H248 | -5.220171380  | 3.247755165  | -5.933880260 |
| H249 | -6.043642671  | 3.506735165  | -2.392530293 |
| H250 | -3.077019671  | 2.058591662  | -5.839779403 |
| H251 | -4.366898361  | 1.471739694  | -6.937864667 |
| H252 | -6.735523916  | 9.008767740  | 3.152373177  |
| H253 | -8.442346252  | 9.446043698  | 2.950033084  |
| H254 | -5.863042100  | 8.759749129  | 1.139945422  |
| H255 | -6.668201163  | 7.923533641  | -0.187719148 |
| H256 | -6.209979878  | 9.259217684  | -2.737790096 |
| H257 | -2.814886556  | 6.416677085  | -3.553676942 |
| H258 | -10.299456051 | 4.121209104  | -2.015180790 |
| H259 | -8.288985241  | 3.434742952  | 2.482996460  |
| H260 | -7.079968508  | 5.883043251  | -2.113694447 |
| H261 | -1.300386460  | 6.445976320  | 0.334254764  |
| H262 | -1.781304463  | 7.601511251  | 2.288666439  |
| H263 | -2.890237354  | 5.113742674  | -1.174799493 |
| H264 | -5.030570641  | -1.451728301 | -6.740943996 |
| H265 | -2.334972715  | 10.456882889 | 3.657520008  |
| H266 | -2.409408747  | -0.258269504 | -6.423353461 |
| H267 | -1.783635999  | 7.915340105  | -0.509657686 |
| H268 | -6.833218403  | 3.561417710  | 0.504717801  |
| H269 | -3.343858927  | 9.404907306  | 4.671377762  |
| H270 | -4.564227654  | 8.941262033  | -3.190978471 |
| H271 | -7.693035614  | 7.396836752  | -2.695075341 |
| H272 | -0.029443113  | -1.511008665 | -7.029474613 |
| H273 | -1.490889634  | -3.360579442 | -5.710102326 |
| H274 | -11.752137947 | 4.124218827  | -0.007111958 |
| H275 | -3.876760992  | 0.501949217  | -4.068795325 |
| H276 | -4.095989847  | 7.715037306  | 0.408252232  |
| H277 | -3.075819099  | 7.830341880  | -2.530922479 |
| H278 | -1.433871588  | 5.818520495  | -1.861245451 |
| H279 | -4.870183483  | 5.407970791  | -2.553771121 |
| H280 | -6.181524388  | 4.126341540  | 5.824328993  |
| H281 | -6.516047914  | 6.310266045  | 3.467141380  |
| H282 | -8.202679182  | 8.149196294  | 4.933580388  |
| H283 | -5.215761264  | 5.479745935  | 6.464121420  |
| H284 | -9.053302101  | 5.260977717  | 3.433931646  |
| H285 | 8.284466195   | 5.464523697  | -3.721607600 |
| H286 | 8.838759650   | 3.780038831  | -3.683806458 |
| H287 | 10.495189014  | 2.021474686  | 0.109649919  |
| H288 | 10.365492633  | 5.052039223  | -4.996147989 |
| H289 | 9.499954127   | 4.172247341  | -6.071612307 |
| H290 | 1.052807269   | 5.159078124  | 5.011246359  |
| H291 | -0.936610429  | 6.106610995  | 7.087967067  |
| H292 | -0.507424277  | 9.097475792  | 4.081383170  |
| H293 | -0.713165305  | 4.876591122  | 4.893282948  |
| H294 | -0.182467200  | 7.538235888  | 7.337323537  |
| H295 | 4.168711158   | 7.824901235  | 0.506256086  |
| H296 | 0.677711605   | 7.597382477  | 5.140951350  |

|       |               |               |              |
|-------|---------------|---------------|--------------|
| H297  | 6.268518333   | -6.677779185  | 4.059614338  |
| H298  | 8.899694256   | -5.241365017  | 3.405269624  |
| H299  | 3.934057003   | 6.488218239   | -1.317507740 |
| H300  | 2.318390967   | -0.804119512  | 5.268112159  |
| H301  | 2.515463234   | 7.186462808   | -4.524786097 |
| H302  | 2.211090643   | 1.305774486   | -4.332462888 |
| H303  | 1.433093753   | 6.323302334   | -3.432783444 |
| H304  | 4.164603705   | -4.960786248  | 4.205519814  |
| H305  | 3.677302514   | 5.077759888   | -2.721980511 |
| H306  | 4.757866906   | -4.417073947  | 2.625706863  |
| H307  | 6.690325162   | -5.876015633  | 2.529149318  |
| H308  | 6.917149247   | -3.676948260  | 3.782988229  |
| H309  | 6.339405313   | -4.473673007  | 5.255566435  |
| H310  | -0.764327997  | 2.438513271   | -7.878434314 |
| H311  | 8.275355943   | -8.169634684  | 3.531225636  |
| H312  | 9.910952705   | -8.942987907  | 1.056746223  |
| H313  | 1.743715669   | 2.962076767   | -2.548527258 |
| H314  | 9.745051429   | -10.256601097 | 3.656585502  |
| H315  | 9.098296443   | -10.700945394 | 2.218739331  |
| H316  | 5.027977374   | -2.156159539  | 3.597484907  |
| H317  | -0.094844944  | 4.600691944   | -2.816205827 |
| H318  | 0.968895290   | 1.418616618   | -6.490362009 |
| H319  | 12.178286766  | -3.571047663  | 0.322339311  |
| H320  | 10.992397660  | -0.792228958  | -1.010740937 |
| H321  | 9.819630272   | -3.756338949  | 1.317915329  |
| H322  | 12.409179468  | -3.425575100  | -1.213298541 |
| H323  | 5.120827537   | 9.431718736   | -1.570437662 |
| H324  | 7.794218074   | -1.563464408  | 2.207580181  |
| H325  | 6.243551717   | -5.252711683  | -1.002324857 |
| H326  | 6.178435695   | 4.719173488   | -3.308075884 |
| H327  | 8.371060989   | -4.917542849  | -1.922722167 |
| H328  | 8.980089826   | 1.031572804   | -5.041436504 |
| H329  | 6.845818538   | 0.572406580   | -3.751097901 |
| H330  | 11.214344128  | -9.113301433  | 2.236651243  |
| H331  | 3.802721339   | -0.447762019  | 4.443864594  |
| H332  | 9.235503640   | -2.263239995  | 3.942825317  |
| H333  | 7.551496900   | -0.517431846  | 3.331012953  |
| H334  | 9.583625470   | -4.216348955  | 5.221995636  |
| H335  | 2.282132206   | -4.251488068  | 4.735269239  |
| H336  | 9.277677225   | -2.152322119  | -2.898789867 |
| H337  | 9.874827524   | -2.922575766  | -1.422791653 |
| H338  | 7.716292503   | -4.044740127  | -3.317764033 |
| H339  | 4.414958185   | 3.099617526   | -3.797122963 |
| H340  | -1.365362237  | 4.714623534   | -4.978408245 |
| H341  | -1.797823594  | 3.760866804   | -7.266467966 |
| H342  | 5.308984577   | -3.908862980  | -0.321617623 |
| H343  | 10.362627017  | -3.146912281  | 3.337976106  |
| H344  | 10.767467691  | -4.804062637  | 1.939543329  |
| H345  | 1.553175837   | -2.925538179  | 5.505334540  |
| H346  | 11.062223476  | 0.893917188   | -3.550722351 |
| H347  | 9.618273954   | -0.367731252  | 0.001458646  |
| H348  | 4.827060376   | 3.270314771   | -5.529550219 |
| H349  | 2.663958904   | 8.669581321   | 0.083312632  |
| H350  | 3.831091658   | -0.782022960  | 7.743384997  |
| H351  | 4.208896147   | 0.734359916   | 6.892485422  |
| H352  | 12.742006543  | 2.372684511   | -0.508577547 |
| H353  | 12.915880684  | 0.851763369   | -1.089431374 |
| H354  | 13.155176969  | -1.918799591  | 2.609741413  |
| H355  | 12.220069155  | -1.193568602  | 0.667888625  |
| H356  | 14.223201841  | 0.615567540   | 2.600133108  |
| H357  | 11.817102390  | -1.108705065  | 3.451074446  |
| H358  | 6.248415902   | 1.213673888   | 8.568822538  |
| H359  | -11.730973575 | 5.432973352   | 5.308255679  |
| H360  | 9.487693830   | -5.858093845  | 7.745365666  |
| H361  | 7.956946605   | -3.555730083  | 7.577124610  |
| H362  | -11.559759655 | 5.997542692   | 2.333109125  |
| H363  | -10.634559248 | 3.269270210   | 3.427341597  |
| H364  | -12.038310553 | 3.544082054   | 2.379312465  |
| H365  | 3.358898419   | -1.185049439  | -1.290238226 |
| H366  | -8.167936388  | 3.834665872   | -2.791375442 |
| H367  | 1.089969821   | -1.302124532  | 0.035231351  |
| H368  | 2.555106224   | -0.398855851  | 2.249294880  |
| H369  | 2.292224028   | -2.140328482  | 0.973191725  |
| H370  | -0.712463738  | 0.020221747   | -1.632117811 |
| Mo371 | 6.477515881   | -0.278823121  | -0.586437918 |
| N372  | 2.014364434   | -0.166376654  | 1.408207923  |
| N373  | 1.964900665   | -1.262831411  | 0.567120277  |
| N374  | -0.161859501  | -6.597011490  | -7.796765879 |
| N375  | -3.703050184  | -6.770461366  | -6.599341818 |
| N376  | -4.041168801  | -8.636420070  | -4.527025131 |
| N377  | -1.677354165  | -8.466057036  | -3.010345832 |
| N378  | -2.153997571  | -5.916707487  | -1.883881485 |

|      |               |              |              |
|------|---------------|--------------|--------------|
| N379 | -4.452762584  | -6.497956786 | -0.184497149 |
| N380 | -3.603192989  | -8.647251601 | 1.572840433  |
| N381 | -0.973440949  | -7.984526483 | 2.459221165  |
| N382 | -0.684285165  | -5.252996019 | 2.997211559  |
| N383 | -2.944892151  | -3.593362386 | 4.218123333  |
| N384 | -3.944537785  | -5.783579616 | 5.712378645  |
| N385 | 9.275295208   | -9.897622892 | 2.822801847  |
| N386 | 8.770067847   | -7.300844945 | 3.303193671  |
| N387 | 4.432843574   | -2.881398159 | 4.006679485  |
| N388 | 2.426006807   | -3.323097178 | 5.156926797  |
| N389 | 3.055643647   | -1.138704927 | 4.650736251  |
| N390 | 9.321591490   | -4.994284140 | 5.868336281  |
| N391 | -1.055802048  | -1.639146868 | -6.941214066 |
| N392 | 3.391080384   | -2.161314241 | -5.392990296 |
| N393 | -3.074046485  | -0.552097747 | -5.686504931 |
| N394 | -5.766609449  | -1.230841222 | -6.073452051 |
| N395 | -6.255698311  | -3.194751993 | -4.119610011 |
| N396 | -6.039940686  | -1.777892623 | -1.713021208 |
| N397 | -3.416808519  | 1.602772697  | -1.916477753 |
| N398 | -1.737060516  | 0.2486661243 | -1.759255643 |
| N399 | -8.362065688  | -0.583465834 | -0.776284894 |
| N400 | -12.172378154 | 1.448362951  | -2.732466858 |
| N401 | -13.706339362 | 1.734718223  | -1.155089113 |
| N402 | 3.958881365   | 2.375736506  | 9.020967357  |
| N403 | -0.105267468  | 6.650030015  | 6.834147696  |
| N404 | -1.418852333  | 8.683348832  | 4.258534967  |
| N405 | -2.697577131  | 7.897835281  | 1.939447697  |
| N406 | -4.640779299  | 6.419172960  | -2.545028687 |
| N407 | -5.462601724  | 8.588041519  | -2.883572739 |
| N408 | -6.906826052  | 6.869320832  | -2.324116956 |
| N409 | -3.187911516  | 5.081943850  | 2.242335251  |
| N410 | -4.924384212  | 5.054401949  | 4.438930885  |
| N411 | -7.220328596  | 6.518771079  | 4.174560268  |
| N412 | -6.726650036  | 8.418636778  | 0.699924141  |
| N413 | -9.868771756  | 5.851387343  | 3.577555193  |
| N414 | 9.436425521   | 4.952330476  | -5.411095839 |
| N415 | 6.077884442   | 4.301542414  | -4.235868475 |
| N416 | 3.390590993   | 5.552075172  | -3.594403752 |
| N417 | 3.490562854   | 7.406156114  | -1.409588246 |
| N418 | 4.326591390   | 4.386986346  | -8.625898567 |
| N419 | 1.540716427   | 4.109182049  | -7.994157232 |
| N420 | 12.235722279  | 1.608555710  | -0.965058424 |
| N421 | 8.160338702   | 0.335174657  | -2.054591364 |
| N422 | 8.954959276   | 0.861848769  | -4.039595907 |
| N423 | 12.182899326  | -0.517645264 | 1.435938725  |
| N424 | -1.931159722  | 2.133167239  | 0.674017611  |
| N425 | -1.103339769  | 1.507551691  | 1.073772373  |
| O426 | -1.787512847  | -6.449668025 | -5.406136045 |
| O427 | -4.808931536  | -6.982764717 | -3.155804916 |
| O428 | -2.768400884  | -9.473318851 | -1.273567995 |
| O429 | -0.950591512  | -6.613073520 | -0.081093826 |
| O430 | -3.632884085  | -4.855088917 | 1.153092221  |
| O431 | -4.727418436  | -7.503260417 | 3.198367412  |
| O432 | -1.326088889  | -9.278200791 | 4.323098601  |
| O433 | 1.452531564   | -5.596511172 | 3.782167732  |
| O434 | -1.107135748  | -3.106966348 | 5.497832741  |
| O435 | -4.001124529  | -4.370760703 | 7.490996610  |
| O436 | -3.155298080  | -7.564250333 | 8.714989171  |
| O437 | 10.703327573  | -6.586587253 | 2.255236386  |
| O438 | 8.266687035   | -7.021301529 | 6.110005445  |
| O439 | 9.361190291   | -3.289223732 | 9.032981077  |
| O440 | -3.344837929  | -2.277629557 | -4.197082534 |
| O441 | 1.738554708   | -1.350486834 | -6.729682882 |
| O442 | -6.304710650  | -0.054218106 | -4.192407778 |
| O443 | -5.041195334  | 2.548295839  | -5.280499188 |
| O444 | -8.478614433  | -3.220218738 | -4.692659867 |
| O445 | -6.427485451  | -3.673163384 | -0.495153353 |
| O446 | -7.446334146  | -0.354548356 | 1.302313367  |
| O447 | -10.995482386 | -0.705148740 | 1.577610120  |
| O448 | 6.007879734   | -0.314629479 | 9.901603902  |
| O449 | -1.931084856  | 1.208323094  | 6.704530448  |
| O450 | -2.571154057  | 6.967021496  | 5.217757971  |
| O451 | -4.444016780  | 9.345510099  | 2.303571712  |
| O452 | -4.976935752  | 5.417991840  | 0.855231313  |
| O453 | -5.819679358  | 3.088001520  | 3.657184713  |
| O454 | -2.577824344  | 3.389163749  | 4.887560823  |
| O455 | -7.690207537  | 6.362423058  | 6.411933800  |
| O456 | -10.540000348 | 8.020284343  | 3.799477907  |
| O457 | -8.737167356  | 7.395045604  | 1.069372479  |
| O458 | -13.384547278 | 5.364795271  | 4.107942611  |
| O459 | -7.622461946  | 3.922201449  | -1.985648987 |
| O460 | 7.198254998   | 3.440128924  | -6.044968327 |

|                                                                                                                                                                                     |      |                                         |              |              |
|-------------------------------------------------------------------------------------------------------------------------------------------------------------------------------------|------|-----------------------------------------|--------------|--------------|
|                                                                                                                                                                                     | O461 | 3.326408423                             | 5.292909789  | -5.869475348 |
|                                                                                                                                                                                     | O462 | 2.126786831                             | 8.819424448  | -2.558044250 |
|                                                                                                                                                                                     | O463 | 4.440830459                             | 10.603582799 | -0.043674019 |
|                                                                                                                                                                                     | O464 | 1.406981391                             | 2.906337484  | -9.926471857 |
|                                                                                                                                                                                     | O465 | 5.415553716                             | -0.762405301 | -7.235506941 |
|                                                                                                                                                                                     | O466 | 6.422975803                             | 0.897735919  | -6.135627668 |
|                                                                                                                                                                                     | O467 | -1.174104836                            | 6.250039547  | -7.098502260 |
|                                                                                                                                                                                     | O468 | 11.650416672                            | 1.521821287  | 2.267602947  |
|                                                                                                                                                                                     | O469 | 13.882347768                            | 0.080521134  | 4.540584907  |
|                                                                                                                                                                                     | O470 | 4.769505814                             | -3.139520163 | -3.036222080 |
|                                                                                                                                                                                     | O471 | 4.206188214                             | -5.278432616 | -2.577281966 |
|                                                                                                                                                                                     | O472 | 11.766617849                            | -3.778782303 | -2.788651835 |
|                                                                                                                                                                                     | O473 | 10.229945359                            | -4.378610237 | -4.334952558 |
|                                                                                                                                                                                     | O474 | 7.818633743                             | -1.731444371 | 0.345943164  |
|                                                                                                                                                                                     | O475 | 8.226650979                             | -3.923112612 | 0.642639690  |
|                                                                                                                                                                                     | O476 | 6.616510143                             | -2.031751988 | -1.933711234 |
|                                                                                                                                                                                     | O477 | 10.019465642                            | -2.805419102 | 4.209755840  |
|                                                                                                                                                                                     | O478 | 7.724483860                             | -1.466867523 | 3.191080987  |
|                                                                                                                                                                                     | O479 | -5.127257674                            | 3.602418477  | -2.752848310 |
|                                                                                                                                                                                     | O480 | 12.857899380                            | -3.276826058 | -0.324782241 |
|                                                                                                                                                                                     | O481 | 10.716840939                            | -3.835531688 | 1.740577206  |
|                                                                                                                                                                                     | S482 | 0.165478550                             | 5.789139644  | 2.822277519  |
|                                                                                                                                                                                     | S483 | 1.343854645                             | 3.873742622  | 0.195661982  |
|                                                                                                                                                                                     | S484 | 4.651697195                             | 0.435579072  | -1.993028418 |
|                                                                                                                                                                                     | S485 | 1.404993847                             | 2.201926991  | 3.080078297  |
|                                                                                                                                                                                     | S486 | 1.356640877                             | 0.814608301  | -1.204115915 |
|                                                                                                                                                                                     | S487 | 4.980344407                             | 4.217287288  | -1.059343317 |
|                                                                                                                                                                                     | S488 | 4.891975241                             | -1.307487592 | 0.890923107  |
|                                                                                                                                                                                     | S489 | 3.803416283                             | 4.693288866  | 2.519861098  |
|                                                                                                                                                                                     | S490 | 6.991786581                             | 1.702439693  | 0.584277742  |
|                                                                                                                                                                                     | S491 | 5.062685047                             | 1.249190163  | 3.758493432  |
|                                                                                                                                                                                     | end  |                                         |              |              |
| <b>Fe2-brNH-NH2-Fe6<br/>2N2 TS<br/>35, S=1<br/><br/>Fe(139) -2.509<br/>Fe(140) 0.726<br/>Fe(141) -2.576<br/>Fe(142) 2.554<br/>Fe(143) 2.338<br/>Fe(144) 2.140<br/>Fe(145) 0.097</b> |      | <b>bm626x2nh6nh22n2xdt1f_1_53327.67</b> |              |              |
|                                                                                                                                                                                     | C1   | -2.336782453                            | -6.682969373 | -6.515029164 |
|                                                                                                                                                                                     | C2   | -1.602798106                            | -6.929667928 | -7.838780633 |
|                                                                                                                                                                                     | C3   | -4.539997741                            | -6.406994305 | -5.459534899 |
|                                                                                                                                                                                     | C4   | -4.454031934                            | -7.350923986 | -4.264820553 |
|                                                                                                                                                                                     | C5   | -3.795447698                            | -9.539681487 | -3.399915550 |
|                                                                                                                                                                                     | C6   | -2.667660195                            | -9.128139546 | -2.447211981 |
|                                                                                                                                                                                     | C7   | -0.648356872                            | -7.806536508 | -2.114698865 |
|                                                                                                                                                                                     | C8   | -1.249142281                            | -6.688654981 | -1.261082698 |
|                                                                                                                                                                                     | C9   | -2.888476899                            | -4.854089809 | -1.173952234 |
|                                                                                                                                                                                     | C10  | -3.672406313                            | -5.384830798 | 0.036066599  |
|                                                                                                                                                                                     | C11  | -5.270007701                            | -6.980508786 | 0.900988987  |
|                                                                                                                                                                                     | C12  | -4.495183430                            | -7.711548359 | 2.005191210  |
|                                                                                                                                                                                     | C13  | -2.906794011                            | -9.494177720 | 2.533619859  |
|                                                                                                                                                                                     | C14  | -1.653240025                            | -8.903200796 | 3.185825896  |
|                                                                                                                                                                                     | C15  | 0.295296959                             | -7.443273823 | 2.883428458  |
|                                                                                                                                                                                     | C16  | 0.349415192                             | -5.973269627 | 3.281911584  |
|                                                                                                                                                                                     | C17  | -0.739175051                            | -3.746539316 | 3.154517636  |
|                                                                                                                                                                                     | C18  | -1.605674208                            | -3.418230039 | 4.382129295  |
|                                                                                                                                                                                     | C19  | -1.166235704                            | -2.961768771 | 1.899053695  |
|                                                                                                                                                                                     | C20  | -1.172540749                            | -1.458719300 | 2.191082499  |
|                                                                                                                                                                                     | C21  | -0.291547018                            | -3.372055806 | 0.711742353  |
|                                                                                                                                                                                     | C22  | -3.910698934                            | -3.346560767 | 5.272440535  |
|                                                                                                                                                                                     | C23  | -3.950456947                            | -4.526631975 | 6.256317276  |
|                                                                                                                                                                                     | C24  | -5.305285833                            | -3.016971066 | 4.683927092  |
|                                                                                                                                                                                     | C25  | -6.368493590                            | -2.905038604 | 5.781768430  |
|                                                                                                                                                                                     | C26  | -5.252992953                            | -1.731001078 | 3.851917736  |
|                                                                                                                                                                                     | C27  | -4.098883790                            | -6.929531436 | 6.569424595  |
|                                                                                                                                                                                     | C28  | -3.056664582                            | -6.970774361 | 7.669180785  |
|                                                                                                                                                                                     | C29  | 10.131942838                            | -8.946966865 | 2.132818612  |
|                                                                                                                                                                                     | C30  | 9.897173467                             | -7.497720231 | 2.560953877  |
|                                                                                                                                                                                     | C31  | 8.352463037                             | -6.050583648 | 3.885857202  |
|                                                                                                                                                                                     | C32  | 8.647872042                             | -6.075066207 | 5.398281983  |
|                                                                                                                                                                                     | C33  | 6.853996736                             | -5.830049791 | 3.604976380  |
|                                                                                                                                                                                     | C34  | 6.320309554                             | -4.502834929 | 4.148423671  |
|                                                                                                                                                                                     | C35  | 4.892877619                             | -4.229001925 | 3.665211838  |
|                                                                                                                                                                                     | C36  | 3.346650741                             | -2.468918524 | 4.612337771  |
|                                                                                                                                                                                     | C37  | 9.722103068                             | -4.905320729 | 7.261654469  |
|                                                                                                                                                                                     | C38  | 8.961277922                             | -3.835697227 | 8.015037959  |
|                                                                                                                                                                                     | C39  | -1.364608660                            | -2.268922892 | -5.656487180 |
|                                                                                                                                                                                     | C40  | -2.695562743                            | -1.731984156 | -5.095259526 |
|                                                                                                                                                                                     | C41  | -0.255864369                            | -1.991831410 | -4.614670510 |
|                                                                                                                                                                                     | C42  | 1.081724714                             | -2.727259565 | -4.840770584 |
|                                                                                                                                                                                     | C43  | 2.092782393                             | -2.012918531 | -5.737242189 |
|                                                                                                                                                                                     | C44  | -4.112211030                            | 0.292893766  | -5.101697046 |
|                                                                                                                                                                                     | C45  | -5.503235991                            | -0.355414303 | -5.079932020 |
|                                                                                                                                                                                     | C46  | -4.100597860                            | 1.630165705  | -5.855981380 |
|                                                                                                                                                                                     | C47  | -7.016017225                            | -1.986081193 | -6.107013322 |
|                                                                                                                                                                                     | C48  | -7.309485957                            | -2.874786985 | -4.893535916 |

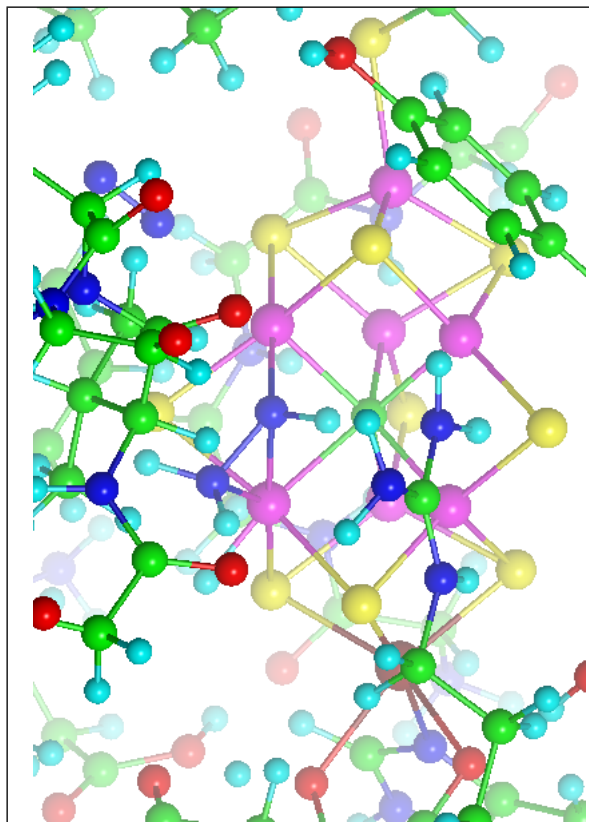

|      |               |              |              |
|------|---------------|--------------|--------------|
| C49  | -6.444087364  | -3.934065795 | -2.859597936 |
| C50  | -6.297659740  | -3.123015152 | -1.572816537 |
| C51  | -5.954813522  | -0.950835429 | -0.506429390 |
| C52  | -7.341264161  | -0.647081298 | 0.114407838  |
| C53  | -5.320389471  | 0.414754457  | 0.808451286  |
| C54  | -3.899647095  | 0.438091463  | -1.276205247 |
| C55  | -2.833372157  | -0.424545740 | -1.187330716 |
| C56  | -2.090293786  | 1.449254173  | -2.113883616 |
| C57  | -9.693717355  | -0.113971288 | -0.401953672 |
| C58  | -10.264892469 | -1.053164625 | 0.658913479  |
| C59  | -10.569703893 | -0.126980850 | -1.673928334 |
| C60  | -11.820388304 | 0.700904033  | -1.634012404 |
| C61  | -12.755407852 | 0.884843033  | -0.634208895 |
| C62  | -13.321546655 | 2.035190301  | -2.441541906 |
| C63  | 4.093244171   | 0.908911978  | 9.050241061  |
| C64  | 5.563443446   | 0.565018892  | 9.199277752  |
| C65  | 3.606535447   | 0.285065099  | 7.717880197  |
| C66  | 2.133582025   | 0.512007182  | 7.471171319  |
| C67  | 1.164316561   | -0.390719953 | 7.947897026  |
| C68  | 1.686541789   | 1.646708650  | 6.770658124  |
| C69  | -0.199610010  | -0.181608762 | 7.720274851  |
| C70  | 0.328144249   | 1.876261832  | 6.549286701  |
| C71  | -0.613191279  | 0.955016431  | 7.014448628  |
| C72  | -0.147867961  | 6.869161362  | 5.382886731  |
| C73  | -1.487565511  | 7.489332379  | 4.951017184  |
| C74  | 0.076632353   | 5.545744532  | 4.649430724  |
| C75  | -2.600045124  | 9.400602467  | 3.859643343  |
| C76  | -3.326016069  | 8.854767758  | 2.627953243  |
| C77  | -3.256561438  | 7.133376652  | 0.832931635  |
| C78  | -3.886296653  | 5.794228110  | 1.301302909  |
| C79  | -2.123503643  | 6.914023760  | -0.195837536 |
| C80  | -2.401527230  | 6.066956076  | -1.444809355 |
| C81  | -3.205807777  | 6.734089063  | -2.574272665 |
| C82  | -5.648057853  | 7.277421427  | -2.597881492 |
| C83  | -3.729921844  | 3.787129022  | 2.696235302  |
| C84  | -4.949198964  | 3.955861142  | 3.611244734  |
| C85  | -2.689529410  | 2.940117302  | 3.465596639  |
| C86  | -5.772456513  | 5.141313443  | 5.583834436  |
| C87  | -6.967351502  | 6.065355919  | 5.423024806  |
| C88  | -8.154473406  | 7.606967438  | 3.965148174  |
| C89  | -9.627269375  | 7.171897315  | 3.760758468  |
| C90  | -7.734555637  | 8.608946633  | 2.885562096  |
| C91  | -7.779453877  | 8.049113972  | 1.470344787  |
| C92  | -11.168271860 | 5.361048119  | 3.144716765  |
| C93  | -12.157232110 | 5.396758144  | 4.299616721  |
| C94  | -11.026676739 | 3.904431323  | 2.613430112  |
| C95  | -10.139490781 | 3.819637865  | 1.389580546  |
| C96  | -10.679078275 | 4.000161519  | 0.106512929  |
| C97  | -8.753349376  | 3.611433116  | 1.499478956  |
| C98  | -9.865803960  | 4.001060040  | -1.027680727 |
| C99  | -7.919664598  | 3.636936694  | 0.378035430  |
| C100 | -8.487939504  | 3.837681679  | -0.875867140 |
| C101 | 8.476455676   | 4.588645741  | -4.349962084 |
| C102 | 7.187668945   | 4.070925194  | -4.962943427 |
| C103 | 4.749726064   | 3.785486576  | -4.580512324 |
| C104 | 3.740587370   | 4.929487893  | -4.744703577 |
| C105 | 2.461382689   | 6.649951143  | -3.542528409 |
| C106 | 2.704449935   | 7.704215621  | -2.466376733 |
| C107 | 3.620879819   | 8.321027760  | -0.294497416 |
| C108 | 4.483033586   | 9.518528630  | -0.642940144 |
| C109 | 3.606451630   | 3.145649138  | -8.929848112 |
| C110 | 2.093321876   | 3.381342459  | -9.004848044 |
| C111 | 3.911262181   | 1.916381241  | -8.044929738 |
| C112 | 5.356574164   | 1.428532545  | -8.254931655 |
| C113 | 5.740828552   | 0.424955051  | -7.191324374 |
| C114 | 0.113872526   | 4.384744966  | -7.985035636 |
| C115 | -0.138298475  | 5.819458601  | -7.565986066 |
| C116 | -0.778689475  | 3.336129325  | -7.274536806 |
| C117 | -0.254204447  | 3.079378035  | -5.891272894 |
| C118 | -0.588941928  | 3.932578915  | -4.827060784 |
| C119 | 0.741183432   | 2.105826132  | -5.698868960 |
| C120 | 0.134411245   | 3.879401039  | -3.631643269 |
| C121 | 1.456263349   | 2.049740756  | -4.503137857 |
| C122 | 1.184851554   | 2.969563065  | -3.484527448 |
| C123 | 11.145038322  | 1.160061007  | -0.062326691 |
| C124 | 11.667781937  | 0.735182302  | 1.318696532  |
| C125 | 10.317234798  | 0.043098197  | -0.714445998 |
| C126 | 9.551267592   | 0.423768889  | -1.940557977 |
| C127 | 10.049592520  | 0.761858222  | -3.180561449 |
| C128 | 7.844911705   | 0.594091929  | -3.306855662 |
| C129 | 12.649457105  | -0.948960495 | 2.755447756  |
| C130 | 13.668777919  | 0.002343485  | 3.344602592  |

|       |              |               |              |
|-------|--------------|---------------|--------------|
| C131  | 4.893629891  | -4.251621005  | -2.380612478 |
| C132  | 5.895866552  | -4.233138604  | -1.210068753 |
| C133  | 7.109608563  | -3.280324406  | -1.398751269 |
| C134  | 8.161340038  | -3.904805895  | -2.344229590 |
| C135  | 9.465366667  | -3.112059937  | -2.463158830 |
| C136  | 10.562498965 | -3.823960156  | -3.286371523 |
| C137  | 7.766150892  | -3.003685442  | -0.039217201 |
| C138  | 3.680857630  | 1.850554090   | 0.783914938  |
| Fe139 | 5.149550007  | 2.130027860   | -0.560555972 |
| Fe140 | 1.582874719  | 1.833326517   | 0.846622508  |
| Fe141 | 3.626035162  | 2.508436926   | 2.684724850  |
| Fe142 | 3.465752304  | 3.768337221   | 0.406213714  |
| Fe143 | 1.707237157  | 4.236699372   | 2.308090219  |
| Fe144 | 5.155429274  | 0.780279471   | 1.575097726  |
| Fe145 | 3.212045748  | -0.046674777  | -0.117638363 |
| H146  | 0.298755331  | -7.088939265  | -7.111260878 |
| H147  | -0.054841403 | -5.604348817  | -7.693371535 |
| H148  | -4.133691496 | -6.827266781  | -7.507572574 |
| H149  | -2.120592571 | -6.374706832  | -8.637397321 |
| H150  | -1.733978205 | -7.998613563  | -8.080902389 |
| H151  | -4.285034977 | -5.405673528  | -5.082269593 |
| H152  | -3.760193773 | -8.870346616  | -5.445984618 |
| H153  | -5.585273894 | -6.381618724  | -5.795258434 |
| H154  | -3.572205515 | -10.527802400 | -3.821248618 |
| H155  | -1.689309379 | -8.110488128  | -3.955188650 |
| H156  | -4.702222972 | -9.624207760  | -2.787677857 |
| H157  | -2.225143711 | -4.064908108  | -0.807983632 |
| H158  | -2.318421229 | -6.015206777  | -2.876447667 |
| H159  | 0.167307460  | -7.405417475  | -2.731145985 |
| H160  | -5.798062829 | -6.146204389  | 1.377755380  |
| H161  | -4.537336328 | -6.847116960  | -1.128831843 |
| H162  | -0.224984565 | -8.546854369  | -1.425029666 |
| H163  | -3.583150871 | -4.401262242  | -1.892788615 |
| H164  | -3.465109421 | -8.810421463  | 0.579979192  |
| H165  | -6.009846775 | -7.668396012  | 0.471044452  |
| H166  | -0.512482815 | -4.396906780  | 0.396783179  |
| H167  | -0.450547934 | -2.709016076  | -0.154156380 |
| H168  | 0.774652324  | -3.362852151  | 0.968802376  |
| H169  | -2.195999011 | -3.255633229  | 1.643238091  |
| H170  | -2.606342888 | -10.418834093 | 2.020051910  |
| H171  | -4.516770509 | -1.789170860  | 3.036578604  |
| H172  | -4.019174315 | -5.918436807  | 4.705009518  |
| H173  | -6.473265302 | -3.834767689  | 6.358014508  |
| H174  | -1.507148044 | -0.905815351  | 1.304166575  |
| H175  | -0.184584017 | -1.067168069  | 2.471465339  |
| H176  | 3.547188564  | 0.417026203   | 9.877641225  |
| H177  | -6.232154583 | -1.527003835  | 3.395789213  |
| H178  | -7.343987977 | -2.675847282  | 5.328724730  |
| H179  | -4.986011890 | -0.870077842  | 4.486974955  |
| H180  | -6.122045031 | -2.095059870  | 6.486725548  |
| H181  | -5.590912372 | -3.855140078  | 4.020094596  |
| H182  | -3.554229456 | -2.490228972  | 5.864363870  |
| H183  | -3.289997656 | -3.910783877  | 3.299436433  |
| H184  | -1.870788990 | -1.210196355  | 3.004963945  |
| H185  | -1.713458641 | 3.023292695   | 2.964008418  |
| H186  | -3.030354398 | 1.894708419   | 3.408905493  |
| H187  | -2.400286278 | 2.555912350   | 5.371705197  |
| H188  | -2.495818984 | 0.485350031   | 7.072034709  |
| H189  | -0.003351328 | 2.750909601   | 5.988026695  |
| H190  | 2.414808975  | 2.350149233   | 6.361837155  |
| H191  | 1.478831114  | -1.283764219  | 8.494869754  |
| H192  | -1.454665413 | -5.614062862  | 2.386492529  |
| H193  | 1.034322081  | -7.570856917  | 2.076885354  |
| H194  | 0.634686356  | -8.026251151  | 3.748678688  |
| H195  | -1.272536031 | -7.765644366  | 1.494962454  |
| H196  | -3.587983361 | -9.763046048  | 3.351250164  |
| H197  | -0.935778885 | -0.909764442  | 8.068540924  |
| H198  | 0.283228190  | -3.453826867  | 3.430641904  |
| H199  | -5.099042384 | -6.990434828  | 7.027723147  |
| H200  | -3.955666567 | -7.823559710  | 5.944602728  |
| H201  | -2.091821481 | -6.468326841  | 7.426827812  |
| H202  | 10.802737309 | -4.725623990  | 7.364823692  |
| H203  | 4.093174598  | -1.734839113  | -6.012034139 |
| H204  | 5.719004775  | -2.355904261  | -2.499664485 |
| H205  | 5.433752321  | 0.936949377   | -9.235085723 |
| H206  | 6.048640116  | 2.282537180   | -8.239067333 |
| H207  | 3.216374058  | 1.094426456   | -8.281672417 |
| H208  | 0.716898176  | 6.511323455   | -7.747256502 |
| H209  | 3.875159835  | 2.876431228   | -9.963560919 |
| H210  | -0.083078010 | -0.903519469  | -4.568830213 |
| H211  | 0.896004568  | -3.717387927  | -5.293906012 |
| H212  | 2.117696461  | 4.438136720   | -7.216229018 |

|      |               |              |              |
|------|---------------|--------------|--------------|
| H213 | -0.179140760  | 4.374264318  | -9.055762323 |
| H214 | 4.231773854   | 4.635896798  | -7.621429144 |
| H215 | 3.714227807   | -2.642964667 | -4.551572311 |
| H216 | 3.733952855   | 2.180584978  | -6.989596735 |
| H217 | 5.322530736   | 4.264091619  | -8.798930807 |
| H218 | -1.394248278  | -2.211437768 | -7.72237754  |
| H219 | -0.649460225  | -2.302239507 | -3.635669908 |
| H220 | 6.639568616   | 1.883793892  | -6.229917188 |
| H221 | 1.548796789   | -2.929699373 | -3.865733979 |
| H222 | -5.391506734  | -1.487439828 | 0.269641772  |
| H223 | -2.778154022  | -1.435166225 | -0.804439613 |
| H224 | -7.464957289  | -4.340956734 | -2.865272068 |
| H225 | -5.311123856  | -2.853555100 | -4.313227314 |
| H226 | -8.188713867  | -0.838395173 | -1.745676895 |
| H227 | -12.818617068 | 0.520755142  | 0.384562800  |
| H228 | -9.942652387  | -2.116234656 | 0.540762703  |
| H229 | -10.796485773 | -1.174254330 | -1.943743332 |
| H230 | -9.643242730  | 0.901981311  | 0.020014343  |
| H231 | -13.901512400 | 2.686813639  | -3.089083884 |
| H232 | -5.383039615  | 1.006721038  | 0.119145065  |
| H233 | -5.940759995  | 0.930781042  | -1.557219405 |
| H234 | -14.525892056 | 2.085149332  | -0.686790789 |
| H235 | -9.960081411  | 0.275141424  | -2.499607026 |
| H236 | -6.008147056  | -1.344999943 | -2.619340581 |
| H237 | -5.765418588  | -4.798589198 | -2.800549534 |
| H238 | -7.867152204  | -1.295827113 | -6.193233708 |
| H239 | -1.416774459  | 2.190353445  | -2.538162991 |
| H240 | -7.008306614  | -2.619814900 | -7.003843140 |
| H241 | 4.077865832   | 2.744805448  | 9.961669224  |
| H242 | 3.007808235   | 2.617024831  | 8.733353114  |
| H243 | -2.206552211  | 5.293317051  | 2.440341018  |
| H244 | -4.084010914  | 3.201782923  | 1.834552716  |
| H245 | -4.031551887  | 5.578539048  | 4.465281122  |
| H246 | -3.994568366  | 2.427882319  | -2.101920363 |
| H247 | -5.145180775  | 3.244767073  | -3.672792762 |
| H248 | -5.221278132  | 3.238284741  | -5.915374030 |
| H249 | -6.048276090  | 3.502100658  | -2.387190441 |
| H250 | -3.083641704  | 2.049865439  | -5.795516044 |
| H251 | -4.356347644  | 1.461115259  | -6.913789531 |
| H252 | -6.745783372  | 9.021606767  | 3.127162635  |
| H253 | -8.458278288  | 9.438157393  | 2.923150368  |
| H254 | -5.848036687  | 8.714432633  | 1.141312953  |
| H255 | -6.641505182  | 7.860811225  | -0.180982709 |
| H256 | -6.208354827  | 9.249741825  | -2.705293975 |
| H257 | -2.815800263  | 6.404890759  | -3.549269263 |
| H258 | -10.302718513 | 4.135856901  | -2.021358820 |
| H259 | -8.294376037  | 3.416358033  | 2.472668903  |
| H260 | -7.082810496  | 5.863722233  | -2.150716133 |
| H261 | -1.285727252  | 6.437089313  | 0.337683129  |
| H262 | -1.769491075  | 7.582241599  | 2.292905923  |
| H263 | -2.862235495  | 5.104345482  | -1.174085089 |
| H264 | -5.021657521  | -1.473480103 | -6.718097644 |
| H265 | -2.321278084  | 10.443434494 | 3.655936022  |
| H266 | -2.419034264  | -0.257265433 | -6.403106501 |
| H267 | -1.762311306  | 7.908408852  | -0.506213393 |
| H268 | -6.840355364  | 3.539368104  | 0.492857526  |
| H269 | -3.337355151  | 9.403091874  | 4.675341647  |
| H270 | -4.551359988  | 8.944846791  | -3.123515491 |
| H271 | -7.688057524  | 7.392914238  | -2.699041327 |
| H272 | -0.042672859  | -1.500281140 | -7.035934309 |
| H273 | -1.492063295  | -3.364892316 | -5.725889187 |
| H274 | -11.754876397 | 4.142829885  | -0.012581589 |
| H275 | -3.890986140  | 0.483958929  | -4.042674583 |
| H276 | -4.073918505  | 7.720165621  | 0.403699191  |
| H277 | -3.065533026  | 7.821082217  | -2.528995505 |
| H278 | -1.415600258  | 5.825946996  | -1.864873910 |
| H279 | -4.864514277  | 5.400162420  | -2.547116657 |
| H280 | -6.155460111  | 4.141134752  | 5.833731057  |
| H281 | -6.501673670  | 6.324763403  | 3.445702892  |
| H282 | -8.186719581  | 8.158057041  | 4.918304759  |
| H283 | -5.190412841  | 5.507961752  | 6.440462796  |
| H284 | -9.044362268  | 5.265160337  | 3.394176205  |
| H285 | 8.268141633   | 5.458937792  | -3.710953229 |
| H286 | 8.833125283   | 3.777696500  | -3.681816284 |
| H287 | 10.495131060  | 2.025647386  | 0.131779790  |
| H288 | 10.355982874  | 5.061809437  | -4.988103081 |
| H289 | 9.488040407   | 4.192149149  | -6.071611582 |
| H290 | 1.027629838   | 5.120825833  | 4.994764680  |
| H291 | -0.949182905  | 6.090188075  | 7.093991686  |
| H292 | -0.499738366  | 9.080986750  | 4.097874557  |
| H293 | -0.739853346  | 4.847298565  | 4.883374986  |
| H294 | -0.163230114  | 7.506076542  | 7.336965312  |



|       |               |               |              |
|-------|---------------|---------------|--------------|
| H295  | 4.109808866   | 7.791038755   | 0.538274663  |
| H296  | 0.675693891   | 7.558405329   | 5.137263749  |
| H297  | 6.286909053   | -6.675625049  | 4.027046797  |
| H298  | 8.932717890   | -5.254925100  | 3.401866808  |
| H299  | 3.911009771   | 6.461589588   | -1.296378672 |
| H300  | 2.343486791   | -0.829616005  | 5.300305136  |
| H301  | 2.493165518   | 7.154610152   | -4.516843141 |
| H302  | 2.231952074   | 1.295573672   | -4.357003776 |
| H303  | 1.423446747   | 6.298985863   | -3.404405029 |
| H304  | 4.189373119   | -4.950376556  | 4.096314572  |
| H305  | 3.668053426   | 5.047734951   | -2.717562414 |
| H306  | 4.840782299   | -4.335280931  | 2.568470109  |
| H307  | 6.727470805   | -5.861056487  | 2.510338188  |
| H308  | 6.964503673   | -3.676586225  | 3.811871128  |
| H309  | 6.331993236   | -4.496624036  | 5.249479129  |
| H310  | -0.767263108  | 2.420144558   | -7.880402976 |
| H311  | 8.303864804   | -8.182584351  | 3.556067486  |
| H312  | 9.913679302   | -8.983495194  | 1.054101515  |
| H313  | 1.757329381   | 2.937381195   | -2.559685142 |
| H314  | 9.760861939   | -10.280750641 | 3.658976990  |
| H315  | 9.078091135   | -10.713458375 | 2.234295479  |
| H316  | 5.040651982   | -2.123049517  | 3.581624073  |
| H317  | -0.099126410  | 4.557596849   | -2.808111783 |
| H318  | 0.972669548   | 1.403508282   | -6.503613902 |
| H319  | 12.179856025  | -3.589603329  | 0.304830257  |
| H320  | 10.987894117  | -0.790915265  | -0.984341042 |
| H321  | 9.832023894   | -3.766685322  | 1.306700935  |
| H322  | 12.400724439  | -3.449716022  | -1.232873899 |
| H323  | 5.140334277   | 9.382173625   | -1.535715356 |
| H324  | 7.803664522   | -1.577680275  | 2.209318183  |
| H325  | 6.244535470   | -5.252536114  | -1.009997751 |
| H326  | 6.170787241   | 4.695218497   | -3.303402598 |
| H327  | 8.380141117   | -4.910651316  | -1.951551733 |
| H328  | 8.991753448   | 1.034058499   | -5.022391435 |
| H329  | 6.853765167   | 0.569815268   | -3.741854425 |
| H330  | 11.212927526  | -9.135445568  | 2.239659903  |
| H331  | 3.782564366   | -0.445530116  | 4.415855583  |
| H332  | 9.246689647   | -2.273879980  | 3.937864317  |
| H333  | 7.577742933   | -0.523315709  | 3.328797222  |
| H334  | 9.602316603   | -4.228331328  | 5.222518659  |
| H335  | 2.394422003   | -4.283964650  | 4.816046757  |
| H336  | 9.262001729   | -2.145037115  | -2.949466290 |
| H337  | 9.871843103   | -2.893441734  | -1.465872658 |
| H338  | 7.706176677   | -4.038144706  | -3.337243177 |
| H339  | 4.413255963   | 3.081917345   | -3.801875499 |
| H340  | -1.375873641  | 4.677050240   | -4.966787705 |
| H341  | -1.803669035  | 3.737681242   | -7.264985353 |
| H342  | 5.315881468   | -3.903354158  | -0.332121580 |
| H343  | 10.373710283  | -3.158730771  | 3.332845775  |
| H344  | 10.777720664  | -4.816804175  | 1.922239757  |
| H345  | 1.603955278   | -2.967267604  | 5.516751961  |
| H346  | 11.068034456  | 0.904911957   | -3.523378524 |
| H347  | 9.613888520   | -0.358992629  | 0.024637680  |
| H348  | 4.823604797   | 3.259971978   | -5.534904763 |
| H349  | 2.642828545   | 8.676110049   | 0.064281599  |
| H350  | 3.822797386   | -0.793953185  | 7.750865757  |
| H351  | 4.198314413   | 0.721328773   | 6.895670565  |
| H352  | 12.738215497  | 2.378930328   | -0.495225114 |
| H353  | 12.912127006  | 0.857975565   | -1.077071308 |
| H354  | 13.147999469  | -1.922667681  | 2.623727411  |
| H355  | 12.219660980  | -1.190066529  | 0.680463508  |
| H356  | 14.252746120  | 0.589526902   | 2.596716162  |
| H357  | 11.822192572  | -1.094109016  | 3.467328190  |
| H358  | 6.245913025   | 1.197103725   | 8.579765555  |
| H359  | -11.695883819 | 5.415274586   | 5.314970240  |
| H360  | 9.488791436   | -5.870593050  | 7.743902927  |
| H361  | 7.963589552   | -3.576625739  | 7.583810425  |
| H362  | -11.565497228 | 6.001136100   | 2.339534065  |
| H363  | -10.628558502 | 3.270386899   | 3.420845421  |
| H364  | -12.037986750 | 3.543233888   | 2.380929995  |
| H365  | 3.328670459   | -1.051502545  | -1.222948346 |
| H366  | -8.174618290  | 3.813320768   | -2.800535830 |
| H367  | 1.067501808   | -1.259443164  | 0.019149801  |
| H368  | 2.427541445   | -0.314145856  | 2.298769817  |
| H369  | 2.218555037   | -2.097852666  | 1.039592687  |
| H370  | -0.702203104  | -0.000493975  | -1.586706670 |
| Mo371 | 6.494868129   | -0.290716758  | -0.567925491 |
| N372  | 1.933086860   | -0.105161087  | 1.421574593  |
| N373  | 1.907186167   | -1.223098345  | 0.610105000  |
| N374  | -0.188892411  | -6.602809138  | -7.867523606 |
| N375  | -3.699349066  | -6.760046257  | -6.590362153 |
| N376  | -4.009364799  | -8.606789622  | -4.495639249 |

|      |               |              |              |
|------|---------------|--------------|--------------|
| N377 | -1.637065504  | -8.426891013 | -2.985433396 |
| N378 | -2.134405861  | -5.876121015 | -1.885877773 |
| N379 | -4.429606745  | -6.484161216 | -0.178178913 |
| N380 | -3.598956608  | -8.642290568 | 1.580586515  |
| N381 | -0.989348708  | -7.960928427 | 2.458478525  |
| N382 | -0.698642895  | -5.190284133 | 2.924119319  |
| N383 | -2.945744079  | -3.582301116 | 4.201970651  |
| N384 | -3.958062021  | -5.769926971 | 5.711386220  |
| N385 | 9.277988302   | -9.913447933 | 2.835917721  |
| N386 | 8.787502379   | -7.312907521 | 3.304340157  |
| N387 | 4.466881560   | -2.862667298 | 3.996576408  |
| N388 | 2.499682150   | -3.339311048 | 5.201075355  |
| N389 | 3.050970736   | -1.148868386 | 4.640415858  |
| N390 | 9.336765388   | -5.005390453 | 5.867131899  |
| N391 | -1.068600484  | -1.631917758 | -6.944948912 |
| N392 | 3.387592776   | -2.173682454 | -5.411955613 |
| N393 | -3.079232118  | -0.558439801 | -5.665430847 |
| N394 | -5.764797912  | -1.250217052 | -6.059471578 |
| N395 | -6.250919300  | -3.208155716 | -4.101094556 |
| N396 | -6.032562592  | -1.787096283 | -1.695559768 |
| N397 | -3.402846542  | 1.591856925  | -1.867618124 |
| N398 | -1.731255807  | 0.223868525  | -1.716656852 |
| N399 | -8.359728603  | -0.570429660 | -0.779641835 |
| N400 | -12.186045255 | 1.423821119  | -2.758671904 |
| N401 | -13.698386514 | 1.739778625  | -1.165890471 |
| N402 | 3.959042882   | 2.367571357  | 9.018290630  |
| N403 | -0.110076093  | 6.617200581  | 6.831494536  |
| N404 | -1.413694374  | 8.670890639  | 4.271140019  |
| N405 | -2.684271681  | 7.884642925  | 1.944465773  |
| N406 | -4.635983217  | 6.411289549  | -2.531111218 |
| N407 | -5.458757338  | 8.583110582  | -2.855409518 |
| N408 | -6.905732619  | 6.853450012  | -2.338553307 |
| N409 | -3.186474817  | 5.057520979  | 2.211532128  |
| N410 | -4.906221801  | 5.047924805  | 4.423952058  |
| N411 | -7.204649423  | 6.526866631  | 4.156896281  |
| N412 | -6.709411956  | 8.377158020  | 0.693636885  |
| N413 | -9.858604791  | 5.850043401  | 3.565392859  |
| N414 | 9.426219955   | 4.964696772  | -5.402051825 |
| N415 | 6.072467594   | 4.288920801  | -4.236962248 |
| N416 | 3.375991237   | 5.523662118  | -3.588122160 |
| N417 | 3.475900024   | 7.383617690  | -1.395506914 |
| N418 | 4.325502897   | 4.385868500  | -8.612728426 |
| N419 | 1.535793915   | 4.095909265  | -7.986657871 |
| N420 | 12.231460513  | 1.613996356  | -0.949912443 |
| N421 | 8.162120840   | 0.336199153  | -2.038660655 |
| N422 | 8.962369811   | 0.863923311  | -4.020453681 |
| N423 | 12.185920074  | -0.515785103 | 1.449589830  |
| N424 | -2.001054143  | 1.722596576  | 0.845393890  |
| N425 | -0.894236406  | 1.726325127  | 0.95509627   |
| O426 | -1.754046514  | -6.479675366 | -5.435450519 |
| O427 | -4.780158887  | -6.949353492 | -3.132298317 |
| O428 | -2.718818514  | -9.437483588 | -1.246044103 |
| O429 | -0.949024248  | -6.551378349 | -0.063729182 |
| O430 | -3.621031747  | -4.823164602 | 1.143112922  |
| O431 | -4.713291894  | -7.490335873 | 3.207560445  |
| O432 | -1.279026750  | -9.315599329 | 4.290954501  |
| O433 | 1.364825273   | -5.557089510 | 3.867762530  |
| O434 | -1.100179439  | -3.024648541 | 5.442601147  |
| O435 | -3.983354925  | -4.350160491 | 7.484839265  |
| O436 | -3.224770802  | -7.565091820 | 8.723162825  |
| O437 | 10.691719592  | -6.606145284 | 2.199023413  |
| O438 | 8.267682098   | -7.026469450 | 6.103910181  |
| O439 | 9.376857400   | -3.296929618 | 9.029071710  |
| O440 | -3.345145151  | -2.305730728 | -4.199038863 |
| O441 | 1.733276386   | -1.345242390 | -6.736541223 |
| O442 | -6.319154040  | -0.070804818 | -4.183898078 |
| O443 | -5.057516877  | 2.531290971  | -5.265716069 |
| O444 | -8.468666764  | -3.260832410 | -4.692821023 |
| O445 | -6.420196738  | -3.681025715 | -0.477168163 |
| O446 | -7.474304015  | -0.400435535 | 1.316675840  |
| O447 | -11.037609409 | -0.712210510 | 1.537553438  |
| O448 | 5.995072688   | -0.326861664 | 9.915713462  |
| O449 | -1.941188565  | 1.208903521  | 6.726889110  |
| O450 | -2.578218987  | 6.953111086  | 5.213201340  |
| O451 | -4.436656360  | 9.322553006  | 2.312035475  |
| O452 | -4.984621499  | 5.436087492  | 0.849461857  |
| O453 | -5.853093341  | 3.111079873  | 3.631341700  |
| O454 | -2.570222111  | 3.352104916  | 4.828175258  |
| O455 | -7.678058298  | 6.360249684  | 6.391054244  |
| O456 | -10.536334901 | 8.010950385  | 3.828697199  |
| O457 | -8.741020209  | 7.391108981  | 1.049361523  |
| O458 | -13.367136853 | 5.368059274  | 4.139134823  |

|                                                                                                                                                                                                                                                                 |      |              |                                  |              |
|-----------------------------------------------------------------------------------------------------------------------------------------------------------------------------------------------------------------------------------------------------------------|------|--------------|----------------------------------|--------------|
|                                                                                                                                                                                                                                                                 | O459 | -7.631749476 | 3.916177935                      | -1.994654796 |
|                                                                                                                                                                                                                                                                 | O460 | 7.199081557  | 3.446777233                      | -6.051737586 |
|                                                                                                                                                                                                                                                                 | O461 | 3.326538806  | 5.286168135                      | -5.867015445 |
|                                                                                                                                                                                                                                                                 | O462 | 2.143971279  | 8.807246117                      | -2.567891419 |
|                                                                                                                                                                                                                                                                 | O463 | 4.497368393  | 10.547836676                     | 0.012197548  |
|                                                                                                                                                                                                                                                                 | O464 | 1.412870448  | 2.924341311                      | -9.938975576 |
|                                                                                                                                                                                                                                                                 | O465 | 5.416933681  | -0.756122567                     | -7.228107236 |
|                                                                                                                                                                                                                                                                 | O466 | 6.433957377  | 0.903739240                      | -6.135846774 |
|                                                                                                                                                                                                                                                                 | O467 | -1.198639493 | 6.229916155                      | -7.116347413 |
|                                                                                                                                                                                                                                                                 | O468 | 11.663709508 | 1.525449146                      | 2.283275996  |
|                                                                                                                                                                                                                                                                 | O469 | 13.907390480 | 0.076808905                      | 4.541868076  |
|                                                                                                                                                                                                                                                                 | O470 | 4.771762655  | -3.123249763                     | -3.033045943 |
|                                                                                                                                                                                                                                                                 | O471 | 4.220642800  | -5.271405097                     | -2.605386630 |
|                                                                                                                                                                                                                                                                 | O472 | 11.752410008 | -3.802795142                     | -2.813121674 |
|                                                                                                                                                                                                                                                                 | O473 | 10.218990024 | -4.351147148                     | -4.381384090 |
|                                                                                                                                                                                                                                                                 | O474 | 7.800644957  | -1.756665830                     | 0.364056381  |
|                                                                                                                                                                                                                                                                 | O475 | 8.254642885  | -3.943989990                     | 0.613349872  |
|                                                                                                                                                                                                                                                                 | O476 | 6.619920827  | -2.030542019                     | -1.927242314 |
|                                                                                                                                                                                                                                                                 | O477 | 10.029534787 | -2.816805247                     | 4.204171550  |
|                                                                                                                                                                                                                                                                 | O478 | 7.734444458  | -1.475431852                     | 3.192057633  |
|                                                                                                                                                                                                                                                                 | O479 | -5.130606131 | 3.596195515                      | -2.742179594 |
|                                                                                                                                                                                                                                                                 | O480 | 12.853621856 | -3.298681975                     | -0.348412181 |
|                                                                                                                                                                                                                                                                 | O481 | 10.726807401 | -3.845361688                     | 1.734301947  |
|                                                                                                                                                                                                                                                                 | S482 | 0.132623603  | 5.764544338                      | 2.808720489  |
|                                                                                                                                                                                                                                                                 | S483 | 1.245557786  | 3.962010150                      | 0.126166919  |
|                                                                                                                                                                                                                                                                 | S484 | 4.661349848  | 0.428421456                      | -1.930873044 |
|                                                                                                                                                                                                                                                                 | S485 | 1.457789599  | 2.209500895                      | 3.151267598  |
|                                                                                                                                                                                                                                                                 | S486 | 1.356742511  | 0.838951800                      | -1.199824164 |
|                                                                                                                                                                                                                                                                 | S487 | 5.034236107  | 4.274532127                      | -1.074814245 |
|                                                                                                                                                                                                                                                                 | S488 | 4.848307870  | -1.311664479                     | 0.890320594  |
|                                                                                                                                                                                                                                                                 | S489 | 3.906056529  | 4.711231734                      | 2.414053058  |
|                                                                                                                                                                                                                                                                 | S490 | 6.997548670  | 1.660214745                      | 0.642235498  |
|                                                                                                                                                                                                                                                                 | S491 | 5.087939942  | 1.247450012                      | 3.732183205  |
|                                                                                                                                                                                                                                                                 | end  |              |                                  |              |
| <b>Fe2-brNH-Fe6NH3-S2BH</b><br><b>2N2 associated</b><br><b>35, S=1/2</b><br><br><b>Fe( 139) -2.464</b><br><b>Fe( 140) -0.311</b><br><b>Fe( 141) -2.614</b><br><b>Fe( 142) 2.601</b><br><b>Fe( 143) 3.138</b><br><b>Fe( 144) 2.293</b><br><b>Fe( 145) -0.784</b> |      |              | <b>fe2brbhf6nh3s2bhdtb.car_4</b> |              |
|                                                                                                                                                                                                                                                                 | C1   | -6.985883524 | 5.865605653                      | -3.095240323 |
|                                                                                                                                                                                                                                                                 | C2   | -8.439371804 | 5.436028509                      | -3.326344697 |
|                                                                                                                                                                                                                                                                 | C3   | -5.052413347 | 7.046633676                      | -4.052431615 |
|                                                                                                                                                                                                                                                                 | C4   | -4.598230747 | 7.899351180                      | -2.873179999 |
|                                                                                                                                                                                                                                                                 | C5   | -5.211273403 | 9.401336096                      | -1.048952946 |
|                                                                                                                                                                                                                                                                 | C6   | -4.760349680 | 8.547091564                      | 0.140822305  |
|                                                                                                                                                                                                                                                                 | C7   | -4.775239208 | 6.359977290                      | 1.222760580  |
|                                                                                                                                                                                                                                                                 | C8   | -3.339520300 | 5.899870304                      | 0.950599581  |
|                                                                                                                                                                                                                                                                 | C9   | -1.659956127 | 5.357147699                      | -0.744152100 |
|                                                                                                                                                                                                                                                                 | C10  | -0.630667624 | 6.440739548                      | -0.392149307 |
|                                                                                                                                                                                                                                                                 | C11  | -0.051615912 | 8.791842489                      | -0.376839986 |
|                                                                                                                                                                                                                                                                 | C12  | 0.116759526  | 9.087645309                      | 1.119291157  |
|                                                                                                                                                                                                                                                                 | C13  | -1.010251557 | 9.656678793                      | 3.213550625  |
|                                                                                                                                                                                                                                                                 | C14  | -0.815662404 | 8.550486188                      | 4.257152316  |
|                                                                                                                                                                                                                                                                 | C15  | -1.318086614 | 6.215706223                      | 4.851260902  |
|                                                                                                                                                                                                                                                                 | C16  | -0.381508279 | 5.038169379                      | 4.586303826  |
|                                                                                                                                                                                                                                                                 | C17  | 0.980948766  | 3.792460806                      | 2.920993961  |
|                                                                                                                                                                                                                                                                 | C18  | 2.450107884  | 4.256306060                      | 2.988686578  |
|                                                                                                                                                                                                                                                                 | C19  | 0.603448887  | 3.196198338                      | 1.552117992  |
|                                                                                                                                                                                                                                                                 | C20  | 1.628466027  | 2.148790973                      | 1.104263482  |
|                                                                                                                                                                                                                                                                 | C21  | -0.801041474 | 2.591311735                      | 1.602491689  |
|                                                                                                                                                                                                                                                                 | C22  | 4.205109398  | 5.652161014                      | 1.951473541  |
|                                                                                                                                                                                                                                                                 | C23  | 4.476929910  | 6.763344892                      | 2.977116456  |
|                                                                                                                                                                                                                                                                 | C24  | 4.537605997  | 6.086296684                      | 0.500572784  |
|                                                                                                                                                                                                                                                                 | C25  | 5.909943081  | 6.765354112                      | 0.408865594  |
|                                                                                                                                                                                                                                                                 | C26  | 4.473964514  | 4.886246232                      | -0.451832099 |
|                                                                                                                                                                                                                                                                 | C27  | 3.771927478  | 8.863204373                      | 3.966569162  |
|                                                                                                                                                                                                                                                                 | C28  | 4.108476671  | 8.458508347                      | 5.388287947  |
|                                                                                                                                                                                                                                                                 | C29  | -6.927915351 | 1.656827868                      | 11.667968409 |
|                                                                                                                                                                                                                                                                 | C30  | -5.828935166 | 0.690791511                      | 11.218461744 |
|                                                                                                                                                                                                                                                                 | C31  | -3.478303131 | 0.614758729                      | 10.372148496 |
|                                                                                                                                                                                                                                                                 | C32  | -2.462216396 | 0.675518223                      | 11.530420493 |
|                                                                                                                                                                                                                                                                 | C33  | -2.926770320 | 1.272219764                      | 9.092984809  |
|                                                                                                                                                                                                                                                                 | C34  | -1.666277938 | 0.589891612                      | 8.554770588  |
|                                                                                                                                                                                                                                                                 | C35  | -1.226607308 | 1.172839838                      | 7.207069121  |
|                                                                                                                                                                                                                                                                 | C36  | 0.955662929  | 0.685277462                      | 6.036244281  |
|                                                                                                                                                                                                                                                                 | C37  | -1.009109910 | -0.626628533                     | 13.008251390 |
|                                                                                                                                                                                                                                                                 | C38  | 0.412567215  | -0.939470642                     | 12.592230250 |
|                                                                                                                                                                                                                                                                 | C39  | -4.789475513 | 1.847989277                      | -3.592231426 |
|                                                                                                                                                                                                                                                                 | C40  | -3.537071297 | 2.303931471                      | -4.366790347 |
|                                                                                                                                                                                                                                                                 | C41  | -4.338976684 | 1.115106677                      | -2.309571249 |
|                                                                                                                                                                                                                                                                 | C42  | -5.433390894 | 0.918076619                      | -1.239101767 |
|                                                                                                                                                                                                                                                                 | C43  | -6.273269425 | -0.354429995                     | -1.361458228 |
|                                                                                                                                                                                                                                                                 | C44  | -1.920474362 | 1.454222996                      | -6.055789953 |
|                                                                                                                                                                                                                                                                 | C45  | -1.578840958 | 2.755547261                      | -6.788722936 |
|                                                                                                                                                                                                                                                                 | C46  | -1.898842058 | 0.238657598                      | -6.995758002 |

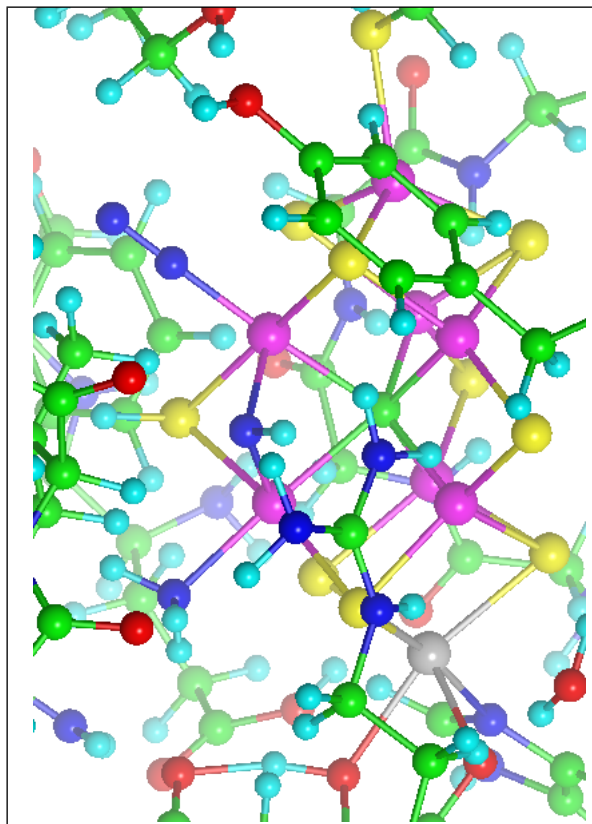

|      |              |               |               |
|------|--------------|---------------|---------------|
| C47  | -2.430338375 | 4.788912056   | -7.851002364  |
| C48  | -1.776767617 | 5.848179670   | -6.955024470  |
| C49  | -1.054356603 | 6.486756774   | -4.704920474  |
| C50  | 0.262574359  | 5.959008361   | -4.133177120  |
| C51  | 1.938547803  | 4.178207515   | -4.025818579  |
| C52  | 3.160811689  | 4.833562743   | -4.694202573  |
| C53  | 2.043669696  | 2.665108090   | -4.279727042  |
| C54  | 0.998316093  | 1.840208846   | -3.604571564  |
| C55  | 0.096520231  | 2.082703748   | -2.588955272  |
| C56  | -0.222267842 | 0.035498670   | -3.170437028  |
| C57  | 4.064741857  | 5.623275080   | -6.840625185  |
| C58  | 4.695030145  | 6.866396527   | -6.216475198  |
| C59  | 3.465431696  | 5.952082674   | -8.228369512  |
| C60  | 4.426830584  | 6.027905786   | -9.376351702  |
| C61  | 5.698201205  | 6.561281580   | -9.463203437  |
| C62  | 5.078958665  | 5.721316891   | -11.418012817 |
| C63  | 5.537405659  | -1.857437829  | 8.090206347   |
| C64  | 4.825671454  | -2.396311247  | 9.316235033   |
| C65  | 4.452540275  | -1.244681837  | 7.168021491   |
| C66  | 5.030577750  | -0.623025498  | 5.918990809   |
| C67  | 5.422616216  | 0.727395645   | 5.888275525   |
| C68  | 5.193978622  | -1.382347483  | 4.745893858   |
| C69  | 5.942666188  | 1.307000958   | 4.725889591   |
| C70  | 5.723638612  | -0.821795355  | 3.583082086   |
| C71  | 6.088141984  | 0.526363600   | 3.571927032   |
| C72  | 7.338999147  | -4.722443194  | 0.638505069   |
| C73  | 7.921634564  | -4.511898962  | -0.773425294  |
| C74  | 6.108536786  | -3.849177707  | 0.818197108   |
| C75  | 8.425664209  | -5.553502095  | -2.958466945  |
| C76  | 7.550955032  | -4.878894345  | -4.018749076  |
| C77  | 5.369394232  | -3.754941131  | -4.434849392  |
| C78  | 5.403640466  | -2.247116646  | -4.070100488  |
| C79  | 3.970185762  | -4.375319875  | -4.221687081  |
| C80  | 2.753385543  | -3.709806219  | -4.875071870  |
| C81  | 2.551935255  | -3.952880382  | -6.380654677  |
| C82  | 3.856679472  | -2.977923685  | -8.274683817  |
| C83  | 5.450342565  | -0.523354023  | -2.337294223  |
| C84  | 6.788904544  | 0.168622741   | -2.643320861  |
| C85  | 5.166101763  | -0.329361174  | -0.835842785  |
| C86  | 9.215539867  | -0.062112262  | -2.433920973  |
| C87  | 10.075409207 | -0.164323720  | -3.682868567  |
| C88  | 10.193559717 | -0.877977355  | -6.009007464  |
| C89  | 10.488110160 | 0.281314735   | -6.993526637  |
| C90  | 9.638041201  | -2.091125109  | -6.761445646  |
| C91  | 8.309814256  | -1.827034318  | -7.456800489  |
| C92  | 9.912510847  | 2.558236752   | -7.712047214  |
| C93  | 11.260136099 | 3.264999152   | -7.693875770  |
| C94  | 8.777461389  | 3.572361244   | -7.390403153  |
| C95  | 7.400665891  | 2.959142921   | -7.520596580  |
| C96  | 6.741066036  | 2.949906236   | -8.760135432  |
| C97  | 6.764017996  | 2.337492230   | -6.432909410  |
| C98  | 5.501595458  | 2.325998689   | -8.919055297  |
| C99  | 5.535633095  | 1.686120892   | -6.577935958  |
| C100 | 4.917903795  | 1.681318675   | -7.827094202  |
| C101 | -5.072552835 | -9.160953504  | 1.345263211   |
| C102 | -5.209617166 | -8.086589445  | 0.280764004   |
| C103 | -3.953532957 | -6.420228907  | -1.070116900  |
| C104 | -3.117052053 | -6.810425416  | -2.293944497  |
| C105 | -0.842428336 | -7.309056627  | -3.075567126  |
| C106 | 0.360878083  | -8.135472781  | -2.631737099  |
| C107 | 1.895168042  | -8.843105247  | -0.880742437  |
| C108 | 1.799341526  | -10.349671939 | -1.016756627  |
| C109 | -7.081610822 | -5.823349862  | -4.299101275  |
| C110 | -6.345908688 | -5.143808672  | -5.458285589  |
| C111 | -7.082718601 | -4.899238773  | -3.059902458  |
| C112 | -8.126591436 | -5.359924957  | -2.025118026  |
| C113 | -7.944267289 | -4.624424382  | -0.716738806  |
| C114 | -4.224781894 | -4.702132901  | -6.579121569  |
| C115 | -3.130145745 | -5.646251005  | -7.034941978  |
| C116 | -3.761437096 | -3.243088969  | -6.342768473  |
| C117 | -3.017177239 | -3.166089708  | -5.044269599  |
| C118 | -1.655977233 | -3.500461578  | -4.983535973  |
| C119 | -3.732505852 | -2.979618273  | -3.847366573  |
| C120 | -1.051508368 | -3.743352324  | -3.747992951  |
| C121 | -3.126136031 | -3.225894106  | -2.616265811  |
| C122 | -1.796395147 | -3.656814276  | -2.572464238  |
| C123 | -4.566829415 | -7.350255694  | 7.111419470   |
| C124 | -3.921364446 | -7.137456809  | 8.487884871   |
| C125 | -5.171201011 | -6.047145178  | 6.568571486   |
| C126 | -5.597115361 | -6.068948695  | 5.135596534   |
| C127 | -6.629821626 | -6.780865066  | 4.561651087   |
| C128 | -5.762918586 | -5.410122169  | 3.053348194   |

|  |       |              |              |              |
|--|-------|--------------|--------------|--------------|
|  | C129  | -3.978231333 | -6.130637647 | 10.689542645 |
|  | C130  | -3.567976928 | -7.408142746 | 11.386509707 |
|  | C131  | -5.922911064 | 0.359209663  | 3.512010856  |
|  | C132  | -5.464536103 | -0.097626134 | 4.910733989  |
|  | C133  | -5.726032834 | -1.590800219 | 5.245513984  |
|  | C134  | -7.210928724 | -1.828685170 | 5.603949909  |
|  | C135  | -7.526579261 | -3.245025636 | 6.091773257  |
|  | C136  | -8.973105976 | -3.424163321 | 6.600705830  |
|  | C137  | -4.851540574 | -2.018314222 | 6.436441433  |
|  | C138  | -0.197297104 | -3.484220260 | 2.271644373  |
|  | Fe139 | -1.735602555 | -4.768710004 | 2.364651211  |
|  | Fe140 | 0.687087412  | -2.147230214 | 0.906821951  |
|  | Fe141 | 1.577794266  | -3.763476735 | 3.180272824  |
|  | Fe142 | 0.498218870  | -4.931410007 | 1.156099263  |
|  | Fe143 | 2.957056196  | -4.045990124 | 0.944430294  |
|  | Fe144 | -0.694213545 | -3.403699770 | 4.221554164  |
|  | Fe145 | -1.504295556 | -1.763535154 | 2.101886035  |
|  | H146  | -8.772584244 | 4.568017689  | -1.509508696 |
|  | H147  | -8.387438486 | 3.498509836  | -2.679463852 |
|  | H148  | -6.998479321 | 6.854708728  | -4.898495062 |
|  | H149  | -8.568955220 | 5.171819526  | -4.388176874 |
|  | H150  | -9.066950834 | 6.327821977  | -3.156841525 |
|  | H151  | -4.422750268 | 6.143917785  | -4.044809950 |
|  | H152  | -6.501145799 | 8.586799976  | -2.567317664 |
|  | H153  | -4.836568522 | 7.598165738  | -4.977081923 |
|  | H154  | -6.095546785 | 9.980953411  | -0.753849246 |
|  | H155  | -5.847567215 | 6.924921145  | -0.540578070 |
|  | H156  | -4.394402064 | 10.106271463 | -1.254206371 |
|  | H157  | -1.338649003 | 4.432210677  | -0.253304823 |
|  | H158  | -3.714302712 | 5.861060170  | -1.067432674 |
|  | H159  | -5.437830912 | 5.483865864  | 1.247298655  |
|  | H160  | 0.939357821  | 8.535559764  | -0.772431535 |
|  | H161  | -1.856506991 | 7.909849514  | -1.166280721 |
|  | H162  | -4.782323220 | 6.827094974  | 2.214771374  |
|  | H163  | -1.660934427 | 5.181754117  | -1.828551406 |
|  | H164  | -1.942160243 | 9.165917829  | 1.349761384  |
|  | H165  | -0.408217001 | 9.700765163  | -0.880589483 |
|  | H166  | -1.559449437 | 3.326171355  | 1.907747858  |
|  | H167  | -1.075146311 | 2.189391144  | 0.614626606  |
|  | H168  | -0.810675086 | 1.743912099  | 2.303462441  |
|  | H169  | 0.608040719  | 4.018522835  | 0.819767548  |
|  | H170  | -1.960709542 | 10.159254453 | 3.443184685  |
|  | H171  | 3.503952219  | 4.370840269  | -0.410017993 |
|  | H172  | 2.705433308  | 7.752845164  | 2.501854897  |
|  | H173  | 5.968998963  | 7.676668191  | 1.020812694  |
|  | H174  | 1.400342900  | 1.827708066  | 0.080055908  |
|  | H175  | 1.586613137  | 1.254084380  | 1.743172993  |
|  | H176  | 6.202942926  | -1.038370309 | 8.423204262  |
|  | H177  | 4.631573613  | 5.208902291  | -1.490990762 |
|  | H178  | 6.112792036  | 7.042892977  | -0.636261496 |
|  | H179  | 5.260082191  | 4.155470868  | -0.201826171 |
|  | H180  | 6.707912558  | 6.082457048  | 0.740793752  |
|  | H181  | 3.772844834  | 6.822604316  | 0.190295567  |
|  | H182  | 4.873708501  | 4.828621527  | 2.244929492  |
|  | H183  | 2.148828239  | 5.472482141  | 1.348582637  |
|  | H184  | 2.657982715  | 2.535301706  | 1.110860842  |
|  | H185  | 4.367829588  | -1.020509791 | -0.526020265 |
|  | H186  | 4.806331440  | 0.703015370  | -0.705863399 |
|  | H187  | 6.317193418  | 0.044400415  | 0.722194946  |
|  | H188  | 6.745812461  | 1.995221716  | 2.486468466  |
|  | H189  | 5.818957018  | -1.415566256 | 2.674538318  |
|  | H190  | 4.868714222  | -2.424942696 | 4.728991983  |
|  | H191  | 5.302682019  | 1.346774698  | 6.780948159  |
|  | H192  | -0.241053521 | 5.526495394  | 2.606493193  |
|  | H193  | -2.337220975 | 5.800276586  | 4.889032299  |
|  | H194  | -1.071781173 | 6.602058291  | 5.847386142  |
|  | H195  | -1.785822389 | 7.192843441  | 3.032168653  |
|  | H196  | -0.195574370 | 10.376312487 | 3.366736067  |
|  | H197  | 6.215872763  | 2.365427103  | 4.713983857  |
|  | H198  | 0.890802220  | 3.013980779  | 3.685036524  |
|  | H199  | 4.579472360  | 9.511285635  | 3.586634387  |
|  | H200  | 2.847357728  | 9.459998967  | 4.002834880  |
|  | H201  | 3.680073246  | 7.483104906  | 5.718230459  |
|  | H202  | -1.348746091 | -1.382525333 | 13.733328956 |
|  | H203  | -7.236203170 | -1.766615347 | -0.249281047 |
|  | H204  | -5.468594787 | -1.735231308 | 3.289304069  |
|  | H205  | -9.134277885 | -5.141472159 | -2.406192672 |
|  | H206  | -8.047883522 | -6.444681347 | -1.862725974 |
|  | H207  | -7.307550093 | -3.862621954 | -3.356120051 |
|  | H208  | -3.302835452 | -6.717231544 | -6.774158716 |
|  | H209  | -8.120187362 | -5.888761239 | -4.657325531 |
|  | H210  | -3.902843881 | 0.144915317  | -2.595640830 |

|      |              |               |               |
|------|--------------|---------------|---------------|
| H211 | -6.135483789 | 1.770070938   | -1.257635472  |
| H212 | -4.506357307 | -5.819910398  | -4.765946089  |
| H213 | -4.918735162 | -4.674100375  | -7.444758785  |
| H214 | -5.689004650 | -7.220694232  | -3.643365531  |
| H215 | -6.337646396 | -0.606180819  | 0.726162994   |
| H216 | -6.074309667 | -4.887477860  | -2.618631399  |
| H217 | -7.256164929 | -7.697202580  | -3.479166351  |
| H218 | -6.321059705 | 1.518735008   | -4.940842009  |
| H219 | -3.521067108 | 1.697721176   | -1.863786345  |
| H220 | -6.933907082 | -6.176577234  | -0.059446045  |
| H221 | -4.973721422 | 0.943195047   | -0.239967521  |
| H222 | 2.020235504  | 4.397974620   | -2.952309353  |
| H223 | -0.058160950 | 3.010917702   | -2.047391025  |
| H224 | -0.812091476 | 7.408662977   | -5.251399281  |
| H225 | -2.192584744 | 4.754080238   | -5.231960940  |
| H226 | 2.042155457  | 5.084154623   | -6.394302341  |
| H227 | 6.342430614  | 7.032938440   | -8.728679319  |
| H228 | 3.962355360  | 7.514270369   | -5.676637026  |
| H229 | 2.869896604  | 6.879004555   | -8.151218338  |
| H230 | 4.836830482  | 4.843450309   | -6.934203509  |
| H231 | 5.135091756  | 5.442022274   | -12.466714280 |
| H232 | 3.0488818983 | 2.354300995   | -3.947968966  |
| H233 | 2.005405644  | 2.489685991   | -5.368209315  |
| H234 | 6.992733587  | 6.621768409   | -11.164598394 |
| H235 | 2.752649729  | 5.149032771   | -8.473690690  |
| H236 | 0.130150264  | 4.173624934   | -5.193183908  |
| H237 | -1.694798886 | 6.778326865   | -3.858447322  |
| H238 | -1.788909622 | 4.712484389   | -8.740303420  |
| H239 | -0.577930996 | -0.990022366  | -3.233284036  |
| H240 | -3.406500529 | 5.170326608   | -8.177978874  |
| H241 | 7.074812258  | -3.205793630  | 7.940491787   |
| H242 | 6.538573277  | -2.660947876  | 6.495394976   |
| H243 | 5.253194702  | -2.646144606  | -2.020162364  |
| H244 | 4.683520475  | 0.022477253   | -2.905030329  |
| H245 | 7.760192439  | -1.566721053  | -2.142479021  |
| H246 | 1.251927836  | 0.048160852   | -4.745273582  |
| H247 | 0.976426634  | -0.127125672  | -6.989438627  |
| H248 | -0.727605550 | -0.475463088  | -8.394588416  |
| H249 | 2.485777032  | 0.361127494   | -6.954687040  |
| H250 | -2.092687775 | -0.662389353  | -6.390380827  |
| H251 | -2.695032828 | 0.343468808   | -7.749744978  |
| H252 | 9.580776914  | -2.953790405  | -6.082840851  |
| H253 | 10.365852382 | -2.336185619  | -7.550569602  |
| H254 | 7.507305022  | -3.539307388  | -6.615675012  |
| H255 | 6.456779888  | -2.581636090  | -7.655811732  |
| H256 | 4.914297094  | -4.264797896  | -9.480303461  |
| H257 | 1.479939220  | -4.065893755  | -6.601084521  |
| H258 | 4.997985875  | 2.339429088   | -9.889511208  |
| H259 | 7.215981400  | 2.356988821   | -5.437712668  |
| H260 | 4.240181486  | -0.957454679  | -8.397456176  |
| H261 | 3.782616263  | -4.393201606  | -3.135763174  |
| H262 | 6.038475452  | -4.721077934  | -2.655751916  |
| H263 | 2.731692806  | -2.628429599  | -4.666675531  |
| H264 | -3.565069845 | 3.161203965   | -7.030349390  |
| H265 | 8.621519602  | -6.581550671  | -3.291011966  |
| H266 | -3.906392823 | 0.709768956   | -5.493600147  |
| H267 | 4.023898175  | -5.429222104  | -4.540277049  |
| H268 | 5.086755682  | 1.163623875   | -5.733010933  |
| H269 | 9.382908004  | -5.012602742  | -2.958330753  |
| H270 | 3.677213638  | -5.019272496  | -8.524205739  |
| H271 | 4.734198752  | -1.891748239  | -9.769399532  |
| H272 | -6.098754010 | 0.280117717   | -3.838278626  |
| H273 | -5.298875581 | 2.781840820   | -3.286812639  |
| H274 | 7.198508984  | 3.439932761   | -9.622603837  |
| H275 | -1.123612517 | 1.336282432   | -5.307353162  |
| H276 | 5.680348781  | -3.821861623  | -5.481723219  |
| H277 | 3.036116067  | -4.895144588  | -6.669382904  |
| H278 | 1.876401865  | -4.129374070  | -4.365982780  |
| H279 | 2.695443909  | -1.911388527  | -6.988222250  |
| H280 | 9.125463449  | 1.004007980   | -2.176733407  |
| H281 | 8.451957429  | -0.814244472  | -4.742827342  |
| H282 | 11.194608911 | -1.156660175  | -5.644570234  |
| H283 | 9.763200773  | -0.561593868  | -1.623924169  |
| H284 | 9.156135720  | 1.470120260   | -6.030038944  |
| H285 | -4.093284486 | -9.654509584  | 1.255696607   |
| H286 | -5.073065467 | -8.623569981  | 2.315918052   |
| H287 | -3.741681561 | -7.667340581  | 6.456532087   |
| H288 | -6.200542566 | -10.696865068 | 2.070599608   |
| H289 | -7.032775767 | -9.652196924  | 1.123392591   |
| H290 | 5.734349325  | -3.990877185  | 1.840834195   |
| H291 | 8.679946332  | -3.442123581  | 1.493974181   |
| H292 | 7.464072591  | -6.454419640  | -1.275974852  |

|       |              |               |              |
|-------|--------------|---------------|--------------|
| H293  | 6.371941267  | -2.791053973  | 0.671787426  |
| H294  | 9.136403048  | -5.008974950  | 1.597084358  |
| H295  | 2.050226288  | -8.609178587  | 0.184575125  |
| H296  | 7.056821106  | -5.779168210  | 0.768458717  |
| H297  | -2.731876290 | 2.337936074   | 9.301532609  |
| H298  | -3.742726138 | -0.428584851  | 10.159044784 |
| H299  | 0.161292488  | -7.633682227  | -0.610375795 |
| H300  | 2.635464478  | -0.007418675  | 5.092515566  |
| H301  | -1.372572128 | -7.887212607  | -3.842157094 |
| H302  | -3.683475648 | -3.079905391  | -1.688707311 |
| H303  | -0.439258570 | -6.410974580  | -3.574524924 |
| H304  | -0.829938071 | 2.186863145   | 7.331186006  |
| H305  | -1.468362660 | -6.592531085  | -1.125765218 |
| H306  | -2.091607974 | 1.237705892   | 6.525929453  |
| H307  | -3.726638852 | 1.221251213   | 8.336933336  |
| H308  | -1.859641069 | -0.485188215  | 8.423744080  |
| H309  | -0.833814336 | 0.684355358   | 9.270717428  |
| H310  | -4.655475044 | -2.603094512  | -6.334268596 |
| H311  | -4.693106514 | 2.309680660   | 10.918830661 |
| H312  | -7.684567772 | 1.645420741   | 10.868453999 |
| H313  | -1.313949064 | -3.886834396  | -1.625321069 |
| H314  | -6.165726069 | 3.175831777   | 12.831944438 |
| H315  | -7.213190477 | 3.695269246   | 11.683795847 |
| H316  | -0.523398693 | -0.635154176  | 6.374610547  |
| H317  | 0.002495040  | -4.014602795  | -3.682529084 |
| H318  | -4.777854548 | -2.662948742  | -3.884686706 |
| H319  | -6.833642419 | -4.059644788  | 9.862948269  |
| H320  | -6.050183285 | -5.777594236  | 7.179518321  |
| H321  | -5.094145577 | -2.419691583  | 8.952587185  |
| H322  | -8.051492777 | -4.503503466  | 8.996699230  |
| H323  | 0.760319356  | -10.750314693 | -1.093643280 |
| H324  | -2.490005650 | -2.920071315  | 7.292710726  |
| H325  | -5.928395804 | 0.539553109   | 5.673616104  |
| H326  | -3.189578055 | -7.777473833  | 0.362579767  |
| H327  | -7.467133843 | -1.105069099  | 6.393846035  |
| H328  | -7.417737643 | -6.627737677  | 2.575174071  |
| H329  | -5.619105257 | -4.887230920  | 2.115729094  |
| H330  | -7.398294920 | 1.202712911   | 12.556778359 |
| H331  | 1.477719907  | -1.256284436  | 5.466069550  |
| H332  | -2.113268584 | -2.962497650  | 9.619360989  |
| H333  | -1.029921489 | -3.451058122  | 7.369478876  |
| H334  | -2.186649907 | -1.388539340  | 11.376395606 |
| H335  | 0.739944724  | 2.738922979   | 6.074620102  |
| H336  | -7.373140203 | -3.955703056  | 5.264306925  |
| H337  | -6.836611418 | -3.533572216  | 6.897222122  |
| H338  | -7.828730936 | -1.583818215  | 4.725555752  |
| H339  | -3.514586580 | -5.546964246  | -0.563307987 |
| H340  | -1.091519618 | -3.619876528  | -5.910796410 |
| H341  | -3.136241033 | -2.954506776  | -7.201561731 |
| H342  | -4.376758267 | 0.085812654   | 4.946151688  |
| H343  | -3.495001803 | -2.966624520  | 10.337488649 |
| H344  | -5.506454584 | -2.054296168  | 10.393432389 |
| H345  | 2.249451025  | 2.177181699   | 5.569617795  |
| H346  | -7.304816642 | -7.517898045  | 4.979751973  |
| H347  | -4.447844740 | -5.232333404  | 6.700531762  |
| H348  | -4.961852251 | -6.175454393  | -1.408365985 |
| H349  | 2.779178053  | -8.489618053  | -1.433411465 |
| H350  | 3.908579296  | -0.486737767  | 7.751231602  |
| H351  | 3.739433736  | -2.039778998  | 6.897178065  |
| H352  | -5.107994072 | -9.298334612  | 7.459121941  |
| H353  | -6.295819378 | -8.227385421  | 7.809019967  |
| H354  | -4.732813637 | -5.641409358  | 11.326474678 |
| H355  | -5.494489206 | -5.941643926  | 9.200752426  |
| H356  | -4.171412123 | -8.305738524  | 11.111595494 |
| H357  | -3.114336453 | -5.450379753  | 10.619841799 |
| H358  | 4.360213900  | -3.400774719  | 9.167550701  |
| H359  | 11.863591750 | 3.108543712   | -6.767282167 |
| H360  | -0.987227422 | 0.351822353   | 13.520001564 |
| H361  | 0.670900037  | -0.663719054  | 11.540318165 |
| H362  | 9.760428096  | 2.157915999   | -8.727705050 |
| H363  | 8.928501769  | 3.965645239   | -6.372892163 |
| H364  | 8.888195916  | 4.415198486   | -8.088047088 |
| H365  | -3.814926031 | -0.455452711  | 2.079680059  |
| H366  | 3.288863465  | 1.253616623   | -8.803767760 |
| H367  | -2.716795499 | 0.317218542   | 1.105602089  |
| H368  | 0.556903609  | -0.673114162  | 2.996850332  |
| H369  | -2.623181618 | 0.480303006   | 2.733897577  |
| H370  | -1.125697165 | -0.437729060  | -0.439869398 |
| Mo371 | -3.424995811 | -3.563555471  | 4.186173581  |
| N372  | 0.035598066  | -0.808770792  | 2.116337054  |
| N373  | -2.822894879 | -0.186703305  | 1.986749727  |
| N374  | -8.927595865 | 4.347553194   | -2.496493755 |

|      |              |               |               |
|------|--------------|---------------|---------------|
| N375 | -6.464170409 | 6.694159090   | -4.048285181  |
| N376 | -5.539266668 | 8.637022855   | -2.240741919  |
| N377 | -5.271773649 | 7.291925779   | 0.220995750   |
| N378 | -3.018396201 | 5.689961343   | -0.346930524  |
| N379 | -0.993530684 | 7.718223032   | -0.652788127  |
| N380 | -1.037633165 | 9.239648334   | 1.822468143   |
| N381 | -1.276851885 | 7.317350037   | 3.909602022   |
| N382 | 0.079640028  | 4.877688134   | 3.324401892   |
| N383 | 2.831227479  | 5.157078393   | 2.040541138   |
| N384 | 3.527082675  | 7.725557946   | 3.104447912   |
| N385 | -6.455967226 | 3.033883077   | 11.861999551  |
| N386 | -4.700004167 | 1.292359305   | 10.790795356  |
| N387 | -0.214386910 | 0.319906722   | 6.576374844   |
| N388 | 1.411224478  | 1.958364806   | 6.109146815   |
| N389 | 1.698192671  | -0.243856166  | 5.407732384   |
| N390 | -1.927387835 | -0.517248520  | 11.891673122  |
| N391 | -5.616167650 | 0.975594510   | -4.436777152  |
| N392 | -6.647404339 | -0.929949346  | -0.203314230  |
| N393 | -3.217147272 | 1.473068180   | -5.395053166  |
| N394 | -2.624779865 | 3.483369232   | -7.247978293  |
| N395 | -1.766655116 | 5.609334063   | -5.614966301  |
| N396 | 0.678523190  | 4.720896272   | -4.524258898  |
| N397 | 0.777922271  | 0.523237357   | -3.965376867  |
| N398 | -0.657733110 | 0.959196522   | -2.323314720  |
| N399 | 2.973637014  | 5.168515425   | -5.995504686  |
| N400 | 4.051346344  | 5.507796855   | -10.605071893 |
| N401 | 6.096567719  | 6.354033966   | -10.766951136 |
| N402 | 6.226514344  | -2.964317994  | 7.422033795   |
| N403 | 8.326932877  | -4.386770613  | 1.678712901   |
| N404 | 7.885401052  | -5.591546914  | -1.610615474  |
| N405 | 6.310346497  | -4.525444627  | -3.626454471  |
| N406 | 3.069042948  | -2.857560629  | -7.208335574  |
| N407 | 4.143565777  | -4.171417033  | -8.826213631  |
| N408 | 4.450107294  | -1.877672017  | -8.793601475  |
| N409 | 5.430026427  | -1.927286205  | -2.745088645  |
| N410 | 7.888063800  | -0.635607159  | -2.548676100  |
| N411 | 9.424727730  | -0.520068425  | -4.832340048  |
| N412 | 7.396502960  | -2.831921264  | -7.353619443  |
| N413 | 9.880096076  | 1.467854181   | -6.744151143  |
| N414 | -6.142859358 | -10.152112651 | 1.207850223   |
| N415 | -4.053270504 | -7.523611463  | -0.123721507  |
| N416 | -1.795851822 | -6.930796839  | -2.048820388  |
| N417 | 0.685715624  | -8.164201764  | -1.314339423  |
| N418 | -6.610847557 | -7.199503962  | -4.095980268  |
| N419 | -4.992241747 | -5.295337263  | -5.500399592  |
| N420 | -5.559878744 | -8.440848698  | 7.128252431   |
| N421 | -5.059247710 | -5.220448445  | 4.169148124   |
| N422 | -6.714672727 | -6.351286636  | 3.254987816   |
| N423 | -4.592879763 | -6.384407794  | 9.398868420   |
| N424 | 2.024643592  | -0.392461650  | -1.089902849  |
| N425 | 1.526691098  | -1.030811419  | -0.313168715  |
| O426 | -6.331682320 | 5.531164771   | -2.092727394  |
| O427 | -3.404521958 | 7.892689050   | -2.522183746  |
| O428 | -3.978461162 | 9.012114174   | 0.986750467   |
| O429 | -2.521831141 | 5.733375535   | 1.8717666750  |
| O430 | 0.468969327  | 6.152195544   | 0.108126016   |
| O431 | 1.238763979  | 9.215890353   | 1.634055594   |
| O432 | -0.309792073 | 8.818863925   | 5.355260633   |
| O433 | -0.131201159 | 4.267007924   | 5.533431229   |
| O434 | 3.221969922  | 3.808018708   | 3.850810206   |
| O435 | 5.524771640  | 6.788485653   | 3.642697905   |
| O436 | 4.746986498  | 9.169848055   | 6.149291633   |
| O437 | -6.035820765 | -0.539759214  | 11.246331873  |
| O438 | -2.186874735 | 1.757998694   | 12.079132268  |
| O439 | 1.239373404  | -1.437140594  | 13.340116221  |
| O440 | -2.893271719 | 3.327934623   | -4.069486415  |
| O441 | -6.615569249 | -0.816412666  | -2.474975647  |
| O442 | -0.396249250 | 3.115991187   | -6.924321124  |
| O443 | -0.619117664 | 0.143698748   | -7.650851285  |
| O444 | -1.304397598 | 6.866638755   | -7.481358281  |
| O445 | 0.905890237  | 6.663147897   | -3.343254730  |
| O446 | 4.244814819  | 4.962408355   | -4.114522275  |
| O447 | 5.870180943  | 7.176953810   | -6.322763104  |
| O448 | 4.733411604  | -1.801339498  | 10.380321967  |
| O449 | 6.573927326  | 1.041321006   | 2.384735761   |
| O450 | 8.406412813  | -3.424257086  | -1.129943779  |
| O451 | 8.004716940  | -4.703811882  | -5.167486596  |
| O452 | 5.413765572  | -1.391832423  | -4.969814663  |
| O453 | 6.843498153  | 1.379430554   | -2.893135242  |
| O454 | 6.347777702  | -0.553069500  | -0.053421921  |
| O455 | 11.288019216 | 0.077643711   | -3.637456438  |
| O456 | 11.291944563 | 0.121077777   | -7.923440637  |



|                                                                                                                                                                                                                                                                  |      |                                   |               |              |
|------------------------------------------------------------------------------------------------------------------------------------------------------------------------------------------------------------------------------------------------------------------|------|-----------------------------------|---------------|--------------|
|                                                                                                                                                                                                                                                                  | O457 | 8.107325853                       | -0.796073833  | -8.113785370 |
|                                                                                                                                                                                                                                                                  | O458 | 11.650993965                      | 3.977975494   | -8.604662338 |
|                                                                                                                                                                                                                                                                  | O459 | 3.710899434                       | 0.973401242   | -7.968542700 |
|                                                                                                                                                                                                                                                                  | O460 | -6.340646750                      | -7.742639403  | -0.142722653 |
|                                                                                                                                                                                                                                                                  | O461 | -3.637549317                      | -7.025443439  | -3.408797832 |
|                                                                                                                                                                                                                                                                  | O462 | 1.039674084                       | -8.725248415  | -3.490536973 |
|                                                                                                                                                                                                                                                                  | O463 | 2.769430002                       | -11.090479344 | -1.013350908 |
|                                                                                                                                                                                                                                                                  | O464 | -6.959104708                      | -4.471008967  | -6.304813450 |
|                                                                                                                                                                                                                                                                  | O465 | -8.371188398                      | -3.494260572  | -0.509859102 |
|                                                                                                                                                                                                                                                                  | O466 | -7.225234662                      | -5.259734449  | 0.232901958  |
|                                                                                                                                                                                                                                                                  | O467 | -2.152138363                      | -5.303857537  | -7.682858899 |
|                                                                                                                                                                                                                                                                  | O468 | -2.833857951                      | -7.673162014  | 8.782851217  |
|                                                                                                                                                                                                                                                                  | O469 | -2.703416468                      | -7.462152375  | 12.250813257 |
|                                                                                                                                                                                                                                                                  | O470 | -5.740121914                      | -0.513931353  | 2.549990089  |
|                                                                                                                                                                                                                                                                  | O471 | -6.359524913                      | 1.510872179   | 3.347507516  |
|                                                                                                                                                                                                                                                                  | O472 | -9.131335305                      | -4.055040609  | 7.704738166  |
|                                                                                                                                                                                                                                                                  | O473 | -9.903417336                      | -2.961737228  | 5.882392529  |
|                                                                                                                                                                                                                                                                  | O474 | -3.998558147                      | -2.984057662  | 6.234392320  |
|                                                                                                                                                                                                                                                                  | O475 | -5.006214575                      | -1.446925371  | 7.534602328  |
|                                                                                                                                                                                                                                                                  | O476 | -5.345804337                      | -2.393395304  | 4.103748891  |
|                                                                                                                                                                                                                                                                  | O477 | -2.516381522                      | -2.925891704  | 10.523808830 |
|                                                                                                                                                                                                                                                                  | O478 | -1.653850688                      | -2.851459845  | 7.818802909  |
|                                                                                                                                                                                                                                                                  | O479 | 1.871326596                       | -0.323880783  | -6.608420523 |
|                                                                                                                                                                                                                                                                  | O480 | -7.515141691                      | -4.765373471  | 9.804519062  |
|                                                                                                                                                                                                                                                                  | O481 | -5.201906248                      | -2.827833675  | 9.855518544  |
|                                                                                                                                                                                                                                                                  | S482 | 4.786374548                       | -4.288615987  | -0.390696117 |
|                                                                                                                                                                                                                                                                  | S483 | 1.288658375                       | -3.958135169  | -0.686083578 |
|                                                                                                                                                                                                                                                                  | S484 | -3.411588621                      | -3.373472894  | 1.820126341  |
|                                                                                                                                                                                                                                                                  | S485 | 2.741636749                       | -2.172747191  | 2.146478146  |
|                                                                                                                                                                                                                                                                  | S486 | -1.332638229                      | -1.756679172  | -0.154575516 |
|                                                                                                                                                                                                                                                                  | S487 | -1.116551644                      | -6.461956660  | 1.101538727  |
|                                                                                                                                                                                                                                                                  | S488 | -1.981477040                      | -1.620105459  | 4.394451807  |
|                                                                                                                                                                                                                                                                  | S489 | 2.301318829                       | -5.710260168  | 2.360249663  |
|                                                                                                                                                                                                                                                                  | S490 | -1.868449045                      | -5.283144849  | 4.553246752  |
|                                                                                                                                                                                                                                                                  | S491 | 1.198259270                       | -3.496721500  | 5.332087144  |
|                                                                                                                                                                                                                                                                  | end  |                                   |               |              |
| <b>Fe2-brNH-Fe6NH3-S2BH</b><br><b>2N2 dissociated</b><br><b>35, S=1/2</b><br><br><b>Fe( 139) -2.564</b><br><b>Fe( 140) -0.421</b><br><b>Fe( 141) -2.622</b><br><b>Fe( 142) 2.526</b><br><b>Fe( 143) 3.189</b><br><b>Fe( 144) 2.245</b><br><b>Fe( 145) -0.669</b> |      | <b>fe2brbhf6nh3s2bhdt.d.car_2</b> |               |              |
|                                                                                                                                                                                                                                                                  | C1   | -6.974374048                      | 5.842390730   | -3.091715110 |
|                                                                                                                                                                                                                                                                  | C2   | -8.431906223                      | 5.426613569   | -3.327926507 |
|                                                                                                                                                                                                                                                                  | C3   | -5.037490358                      | 7.027117849   | -4.039398604 |
|                                                                                                                                                                                                                                                                  | C4   | -4.588460424                      | 7.887599510   | -2.863692794 |
|                                                                                                                                                                                                                                                                  | C5   | -5.210884058                      | 9.386033432   | -1.039525312 |
|                                                                                                                                                                                                                                                                  | C6   | -4.761760349                      | 8.536890466   | 0.154628386  |
|                                                                                                                                                                                                                                                                  | C7   | -4.772404127                      | 6.350012511   | 1.239235864  |
|                                                                                                                                                                                                                                                                  | C8   | -3.338777161                      | 5.891107503   | 0.954464119  |
|                                                                                                                                                                                                                                                                  | C9   | -1.677030992                      | 5.354487313   | -0.762243986 |
|                                                                                                                                                                                                                                                                  | C10  | -0.644192989                      | 6.432527624   | -0.401493067 |
|                                                                                                                                                                                                                                                                  | C11  | -0.052739576                      | 8.779664550   | -0.370423219 |
|                                                                                                                                                                                                                                                                  | C12  | 0.113760300                       | 9.078020354   | 1.125529966  |
|                                                                                                                                                                                                                                                                  | C13  | -1.011960683                      | 9.657709820   | 3.217529698  |
|                                                                                                                                                                                                                                                                  | C14  | -0.812932828                      | 8.548963733   | 4.257344957  |
|                                                                                                                                                                                                                                                                  | C15  | -1.305601056                      | 6.209291745   | 4.839338127  |
|                                                                                                                                                                                                                                                                  | C16  | -0.361203523                      | 5.037256893   | 4.576773720  |
|                                                                                                                                                                                                                                                                  | C17  | 0.988279614                       | 3.778146709   | 2.909446972  |
|                                                                                                                                                                                                                                                                  | C18  | 2.461129374                       | 4.232844464   | 2.977902103  |
|                                                                                                                                                                                                                                                                  | C19  | 0.605852999                       | 3.192340669   | 1.536381420  |
|                                                                                                                                                                                                                                                                  | C20  | 1.609266622                       | 2.127755146   | 1.084044698  |
|                                                                                                                                                                                                                                                                  | C21  | -0.810597963                      | 2.613622642   | 1.574978191  |
|                                                                                                                                                                                                                                                                  | C22  | 4.217236881                       | 5.634518877   | 1.947171525  |
|                                                                                                                                                                                                                                                                  | C23  | 4.483653112                       | 6.743671480   | 2.977004125  |
|                                                                                                                                                                                                                                                                  | C24  | 4.550257562                       | 6.082818859   | 0.500490882  |
|                                                                                                                                                                                                                                                                  | C25  | 5.922399716                       | 6.763534837   | 0.416832291  |
|                                                                                                                                                                                                                                                                  | C26  | 4.486898070                       | 4.895619358   | -0.467977518 |
|                                                                                                                                                                                                                                                                  | C27  | 3.778829126                       | 8.851137226   | 3.954940548  |
|                                                                                                                                                                                                                                                                  | C28  | 4.116118923                       | 8.449891739   | 5.376499706  |
|                                                                                                                                                                                                                                                                  | C29  | -6.938855075                      | 1.656930280   | 11.652085640 |
|                                                                                                                                                                                                                                                                  | C30  | -5.839810142                      | 0.688043896   | 11.209584836 |
|                                                                                                                                                                                                                                                                  | C31  | -3.482576446                      | 0.606204415   | 10.380772105 |
|                                                                                                                                                                                                                                                                  | C32  | -2.465202463                      | 0.668965119   | 11.537781368 |
|                                                                                                                                                                                                                                                                  | C33  | -2.934082253                      | 1.258005411   | 9.097496969  |
|                                                                                                                                                                                                                                                                  | C34  | -1.668878718                      | 0.582545425   | 8.560426110  |
|                                                                                                                                                                                                                                                                  | C35  | -1.252927301                      | 1.151091178   | 7.198102261  |
|                                                                                                                                                                                                                                                                  | C36  | 0.947634117                       | 0.693337865   | 6.046692162  |
|                                                                                                                                                                                                                                                                  | C37  | -1.011353232                      | -0.633534946  | 13.015526791 |
|                                                                                                                                                                                                                                                                  | C38  | 0.408674557                       | -0.947908609  | 12.595942484 |
|                                                                                                                                                                                                                                                                  | C39  | -4.772848520                      | 1.836011679   | -3.578554476 |
|                                                                                                                                                                                                                                                                  | C40  | -3.523617139                      | 2.294460697   | -4.357924045 |
|                                                                                                                                                                                                                                                                  | C41  | -4.329408507                      | 1.100541172   | -2.295477130 |
|                                                                                                                                                                                                                                                                  | C42  | -5.429796601                      | 0.908117936   | -1.230167653 |
|                                                                                                                                                                                                                                                                  | C43  | -6.275076805                      | -0.360614707  | -1.355404845 |
|                                                                                                                                                                                                                                                                  | C44  | -1.922246995                      | 1.458262403   | -6.068251169 |

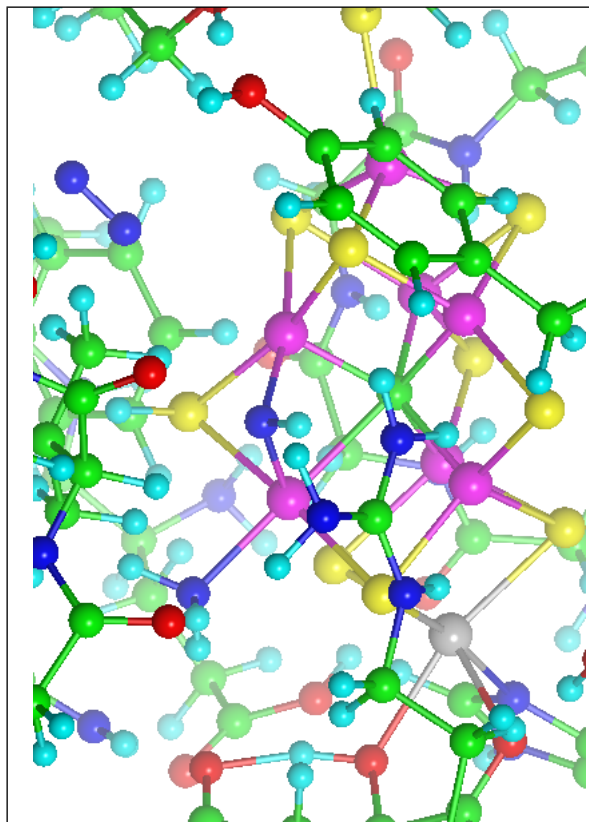

|      |              |               |               |
|------|--------------|---------------|---------------|
| C45  | -1.586000087 | 2.762959140   | -6.796311634  |
| C46  | -1.899974396 | 0.244236819   | -7.009961569  |
| C47  | -2.439607162 | 4.802150352   | -7.841836325  |
| C48  | -1.785052928 | 5.857691176   | -6.942254729  |
| C49  | -1.060187193 | 6.491543451   | -4.692084142  |
| C50  | 0.255960511  | 5.958968545   | -4.122841407  |
| C51  | 1.919293213  | 4.162674051   | -4.025611849  |
| C52  | 3.148200729  | 4.814499755   | -4.686360434  |
| C53  | 2.011512213  | 2.651230984   | -4.293459434  |
| C54  | 0.947453819  | 1.837414680   | -3.634599602  |
| C55  | 0.054255524  | 2.084761362   | -2.612832333  |
| C56  | -0.317047415 | 0.055557236   | -3.224344908  |
| C57  | 4.053659644  | 5.616299300   | -6.830508623  |
| C58  | 4.683588896  | 6.858386405   | -6.205201622  |
| C59  | 3.451279536  | 5.942618212   | -8.217412991  |
| C60  | 4.411341768  | 6.019100042   | -9.365888368  |
| C61  | 5.683258361  | 6.550964168   | -9.451774721  |
| C62  | 5.063349050  | 5.713813564   | -11.407681267 |
| C63  | 5.546258337  | -1.852647355  | 8.099838771   |
| C64  | 4.834980587  | -2.388239392  | 9.327477429   |
| C65  | 4.459764217  | -1.241496325  | 7.177370986   |
| C66  | 5.035363626  | -0.621155668  | 5.926320991   |
| C67  | 5.433111982  | 0.727661094   | 5.896425670   |
| C68  | 5.189525375  | -1.378948275  | 4.751106943   |
| C69  | 5.950751167  | 1.306776446   | 4.732926203   |
| C70  | 5.716801431  | -0.818790694  | 3.586878748   |
| C71  | 6.087860100  | 0.527653969   | 3.576965338   |
| C72  | 7.352432113  | -4.724019244  | 0.637540940   |
| C73  | 7.934740415  | -4.517993603  | -0.774583992  |
| C74  | 6.113250236  | -3.858062494  | 0.810713199   |
| C75  | 8.426466044  | -5.560537711  | -2.962304638  |
| C76  | 7.550770457  | -4.884921442  | -4.021917591  |
| C77  | 5.369674216  | -3.760732111  | -4.435018684  |
| C78  | 5.414807587  | -2.255253183  | -4.063648922  |
| C79  | 3.966797241  | -4.374672635  | -4.217790739  |
| C80  | 2.748625059  | -3.709523107  | -4.869796330  |
| C81  | 2.543787458  | -3.954873375  | -6.374912819  |
| C82  | 3.852931528  | -2.980256578  | -8.269322381  |
| C83  | 5.502386838  | -0.541024788  | -2.317537795  |
| C84  | 6.835589412  | 0.146136437   | -2.631154597  |
| C85  | 5.236191268  | -0.361298432  | -0.805518568  |
| C86  | 9.259596374  | -0.078667527  | -2.429411635  |
| C87  | 10.106347220 | -0.172398174  | -3.688241103  |
| C88  | 10.192541186 | -0.885769152  | -6.012970017  |
| C89  | 10.485084593 | 0.276539684   | -6.995102203  |
| C90  | 9.629098594  | -2.094092775  | -6.766654248  |
| C91  | 8.299615714  | -1.824128167  | -7.456897493  |
| C92  | 9.906524335  | 2.553669593   | -7.712799450  |
| C93  | 11.252777640 | 3.261757119   | -7.689282957  |
| C94  | 8.769167321  | 3.565767464   | -7.387952396  |
| C95  | 7.391968374  | 2.951629819   | -7.516077946  |
| C96  | 6.728261868  | 2.945982395   | -8.753635996  |
| C97  | 6.757418332  | 2.328098150   | -6.428033642  |
| C98  | 5.487487657  | 2.323660482   | -8.910717204  |
| C99  | 5.527783355  | 1.678576628   | -6.571036048  |
| C100 | 4.905952353  | 1.677582644   | -7.818088485  |
| C101 | -5.075230818 | -9.161674554  | 1.340531692   |
| C102 | -5.208342096 | -8.083903243  | 0.279167929   |
| C103 | -3.952006838 | -6.414282838  | -1.063626683  |
| C104 | -3.114380705 | -6.803310695  | -2.288164109  |
| C105 | -0.839185827 | -7.304380714  | -3.070168285  |
| C106 | 0.364695029  | -8.132786548  | -2.631850603  |
| C107 | 1.903484283  | -8.850399637  | -0.889886635  |
| C108 | 1.793812147  | -10.358154984 | -1.007450740  |
| C109 | -7.069904629 | -5.822002690  | -4.292558961  |
| C110 | -6.336386762 | -5.142734197  | -5.453699377  |
| C111 | -7.077223226 | -4.897162463  | -3.054625416  |
| C112 | -8.124904117 | -5.359744833  | -2.024612348  |
| C113 | -7.948399508 | -4.627771084  | -0.713033811  |
| C114 | -4.214375963 | -4.691858011  | -6.570201700  |
| C115 | -3.117811244 | -5.634639805  | -7.024424217  |
| C116 | -3.752300304 | -3.233063304  | -6.330002682  |
| C117 | -3.016626829 | -3.156442659  | -5.026144659  |
| C118 | -1.657495407 | -3.498227683  | -4.954990015  |
| C119 | -3.737994795 | -2.963324639  | -3.834181027  |
| C120 | -1.061010190 | -3.736281899  | -3.714710647  |
| C121 | -3.140612244 | -3.206457825  | -2.598043814  |
| C122 | -1.812368610 | -3.639290168  | -2.543580497  |
| C123 | -4.560308473 | -7.351451403  | 7.115131217   |
| C124 | -3.919719729 | -7.137430882  | 8.493568031   |
| C125 | -5.172692044 | -6.051346282  | 6.573198794   |
| C126 | -5.594930760 | -6.072857329  | 5.138770626   |

|       |              |              |              |
|-------|--------------|--------------|--------------|
| C127  | -6.624486370 | -6.789534269 | 4.565222546  |
| C128  | -5.766145232 | -5.413260346 | 3.057378099  |
| C129  | -3.985718880 | -6.133889034 | 10.695741480 |
| C130  | -3.572652211 | -7.410834536 | 11.392206329 |
| C131  | -5.934521474 | 0.365615837  | 3.512743385  |
| C132  | -5.485556871 | -0.099596193 | 4.911551046  |
| C133  | -5.744824720 | -1.594916578 | 5.238820739  |
| C134  | -7.229792884 | -1.836041103 | 5.595520330  |
| C135  | -7.546699041 | -3.251631830 | 6.084144882  |
| C136  | -8.992903056 | -3.432009763 | 6.595643488  |
| C137  | -4.871598982 | -2.025657565 | 6.428953353  |
| C138  | -0.183775438 | -3.501532300 | 2.282898667  |
| Fe139 | -1.752934518 | -4.759349445 | 2.347443513  |
| Fe140 | 0.581346177  | -2.230355556 | 1.061009109  |
| Fe141 | 1.609240671  | -3.739238582 | 3.172864208  |
| Fe142 | 0.509725149  | -4.929461240 | 1.159477362  |
| Fe143 | 2.956985164  | -3.976866852 | 0.907726642  |
| Fe144 | -0.704051930 | -3.379941756 | 4.207932000  |
| Fe145 | -1.586626746 | -1.720386434 | 2.139461902  |
| H146  | -8.782374597 | 4.557673581  | -1.514432404 |
| H147  | -8.400650622 | 3.486639059  | -2.684866383 |
| H148  | -6.983528418 | 6.846055573  | -4.887571857 |
| H149  | -8.560521845 | 5.166044499  | -4.390881208 |
| H150  | -9.051707720 | 6.324055886  | -3.158059414 |
| H151  | -4.408340299 | 6.124034841  | -4.023443038 |
| H152  | -6.497306415 | 8.556384349  | -2.553089828 |
| H153  | -4.816458089 | 7.572890261  | -4.966185708 |
| H154  | -6.095724320 | 9.967182664  | -0.749369052 |
| H155  | -5.855620020 | 6.916232598  | -0.517079954 |
| H156  | -4.393175062 | 10.089437383 | -1.246438473 |
| H157  | -1.348651255 | 4.421694365  | -0.291191171 |
| H158  | -3.741501482 | 5.834288861  | -1.057313037 |
| H159  | -5.435387350 | 5.474310348  | 1.268455160  |
| H160  | 0.936894160  | 8.511463798  | -0.760796888 |
| H161  | -1.864600851 | 7.913299976  | -1.161400750 |
| H162  | -4.772297415 | 6.816736563  | 2.231436004  |
| H163  | -1.690305523 | 5.198578837  | -1.849315989 |
| H164  | -1.945262029 | 9.170872055  | 1.352852913  |
| H165  | -0.398076629 | 9.691122086  | -0.877437193 |
| H166  | -1.559702709 | 3.370578840  | 1.844562327  |
| H167  | -1.069285920 | 2.193338863  | 0.590072335  |
| H168  | -0.849726045 | 1.788030916  | 2.300250261  |
| H169  | 0.627594576  | 4.019198657  | 0.808767697  |
| H170  | -1.963902098 | 10.156515166 | 3.449824216  |
| H171  | 3.515827634  | 4.381154849  | -0.436291872 |
| H172  | 2.713504307  | 7.734419634  | 2.493044155  |
| H173  | 5.979115745  | 7.669906117  | 1.036045550  |
| H174  | 1.369922133  | 1.830012781  | 0.056103977  |
| H175  | 1.542950421  | 1.223523324  | 1.706690666  |
| H176  | 6.212060861  | -1.032570997 | 8.430047387  |
| H177  | 4.646477279  | 5.233637047  | -1.501821195 |
| H178  | 6.127691600  | 7.048631921  | -0.625630941 |
| H179  | 5.271709246  | 4.159965160  | -0.228237662 |
| H180  | 6.719608942  | 6.078547393  | 0.745819163  |
| H181  | 3.785244386  | 6.822267017  | 0.198443570  |
| H182  | 4.890300706  | 4.813362070  | 2.236180491  |
| H183  | 2.163984115  | 5.451403364  | 1.339881333  |
| H184  | 2.648983892  | 2.486129391  | 1.095261697  |
| H185  | 4.456550730  | -1.069986442 | -0.484311813 |
| H186  | 4.858769242  | 0.663663699  | -0.668250133 |
| H187  | 6.398134426  | 0.041898692  | 0.729697049  |
| H188  | 6.753980508  | 1.995820118  | 2.494839674  |
| H189  | 5.807638328  | -1.412010962 | 2.677469266  |
| H190  | 4.861417551  | -2.420542403 | 4.734066364  |
| H191  | 5.320431972  | 1.345863959  | 6.790742838  |
| H192  | -0.239821189 | 5.506027207  | 2.589921451  |
| H193  | -2.322556040 | 5.787611736  | 4.867410970  |
| H194  | -1.068161723 | 6.592422396  | 5.838807778  |
| H195  | -1.768979380 | 7.192061185  | 3.022288491  |
| H196  | -0.199306717 | 10.379816302 | 3.371287648  |
| H197  | 6.227944305  | 2.364133347  | 4.721368939  |
| H198  | 0.892581954  | 2.996485614  | 3.672783550  |
| H199  | 4.583977876  | 9.499127620  | 3.571159852  |
| H200  | 2.853000526  | 9.445758959  | 3.988428772  |
| H201  | 3.687752212  | 7.475982698  | 5.709238217  |
| H202  | -1.350483005 | -1.388501079 | 13.741920723 |
| H203  | -7.242957236 | -1.771560249 | -0.244741318 |
| H204  | -5.476983562 | -1.733485006 | 3.285055142  |
| H205  | -9.131697155 | -5.140739637 | -2.408283357 |
| H206  | -8.046771666 | -6.444880176 | -1.863531613 |
| H207  | -7.302860238 | -3.861368288 | -3.352556551 |
| H208  | -3.290296049 | -6.705854200 | -6.764018934 |

|      |              |               |               |
|------|--------------|---------------|---------------|
| H209 | -8.107490656 | -5.892401639  | -4.653141063  |
| H210 | -3.896708146 | 0.128840614   | -2.580744930  |
| H211 | -6.128605190 | 1.762684277   | -1.251107610  |
| H212 | -4.494759828 | -5.802485492  | -4.752836475  |
| H213 | -4.907682060 | -4.663856163  | -7.436461167  |
| H214 | -5.672454414 | -7.213953268  | -3.637073777  |
| H215 | -6.341002129 | -0.613438197  | 0.731541812   |
| H216 | -6.070659938 | -4.883890429  | -2.609684501  |
| H217 | -7.238326171 | -7.695066590  | -3.469206548  |
| H218 | -6.304314580 | 1.513355009   | -4.928537233  |
| H219 | -3.509232002 | 1.676343881   | -1.845391095  |
| H220 | -6.935706985 | -6.179381059  | -0.059465076  |
| H221 | -4.973763510 | 0.930973080   | -0.229653870  |
| H222 | 2.001251712  | 4.371635115   | -2.950187698  |
| H223 | -0.085747730 | 3.011418744   | -2.064969355  |
| H224 | -0.817760389 | 7.413755586   | -5.238174314  |
| H225 | -2.196181237 | 4.757471090   | -5.221546791  |
| H226 | 2.029649646  | 5.084935488   | -6.382565355  |
| H227 | 6.327815344  | 7.020753117   | -8.716264174  |
| H228 | 3.951067659  | 7.505628475   | -5.664872083  |
| H229 | 2.853293068  | 6.867988467   | -8.139932672  |
| H230 | 4.825863294  | 4.836677285   | -6.924690425  |
| H231 | 5.119268141  | 5.435566651   | -12.456782202 |
| H232 | 3.009755289  | 2.325772653   | -3.954663684  |
| H233 | 1.978865691  | 2.482433573   | -5.382573306  |
| H234 | 6.978352421  | 6.612085941   | -11.152612542 |
| H235 | 2.740120397  | 5.137206124   | -8.460712404  |
| H236 | 0.110110052  | 4.179595136   | -5.188462208  |
| H237 | -1.699582725 | 6.783786572   | -3.845034703  |
| H238 | -1.797656581 | 4.728464859   | -8.731043622  |
| H239 | -0.693957993 | -0.962222617  | -3.297736612  |
| H240 | -3.415481907 | 5.185385286   | -8.167292244  |
| H241 | 7.085568445  | -3.197998912  | 7.948808583   |
| H242 | 6.540796255  | -2.662185112  | 6.503664232   |
| H243 | 5.292133245  | -2.667240512  | -2.013729894  |
| H244 | 4.731675662  | 0.013344702   | -2.869137901  |
| H245 | 7.811701949  | -1.585912955  | -2.128816860  |
| H246 | 1.169862566  | 0.052841042   | -4.793291373  |
| H247 | 0.974022731  | -0.134222387  | -7.003701652  |
| H248 | -0.727195476 | -0.468541532  | -8.408127573  |
| H249 | 2.482211819  | 0.350444482   | -6.935078470  |
| H250 | -2.092243753 | -0.657750163  | -6.405525147  |
| H251 | -2.695877503 | 0.347947673   | -7.764218018  |
| H252 | 9.571625134  | -2.958592877  | -6.090477187  |
| H253 | 10.353990666 | -2.338849880  | -7.558452908  |
| H254 | 7.490748709  | -3.525456779  | -6.600094267  |
| H255 | 6.436851046  | -2.560037924  | -7.631498182  |
| H256 | 4.932536739  | -4.266373721  | -9.453228279  |
| H257 | 1.470837922  | -4.064591767  | -6.593180617  |
| H258 | 4.981915966  | 2.340480464   | -9.880257995  |
| H259 | 7.211757224  | 2.344724845   | -5.433809112  |
| H260 | 4.223510431  | -0.957160485  | -8.398015868  |
| H261 | 3.782119389  | -4.388100290  | -3.131418185  |
| H262 | 6.034867863  | -4.736523466  | -2.660264307  |
| H263 | 2.727269643  | -2.627788308  | -4.663752148  |
| H264 | -3.573555573 | 3.170438948   | -7.025861459  |
| H265 | 8.618673558  | -6.589716440  | -3.294099173  |
| H266 | -3.902630965 | 0.707820127   | -5.491029362  |
| H267 | 4.015583627  | -5.430438484  | -4.532254519  |
| H268 | 5.080857588  | 1.155362919   | -5.725483096  |
| H269 | 9.385271129  | -5.022165882  | -2.965582548  |
| H270 | 3.698169027  | -5.024202685  | -8.499939637  |
| H271 | 4.729852602  | -1.894064353  | -9.763433045  |
| H272 | -6.088568526 | 0.273482385   | -3.827007763  |
| H273 | -5.280367516 | 2.770761744   | -3.272769751  |
| H274 | 7.184000607  | 3.437917087   | -9.616068400  |
| H275 | -1.120312683 | 1.340477014   | -5.326508549  |
| H276 | 5.674410576  | -3.826788599  | -5.483230130  |
| H277 | 3.023448037  | -4.899771018  | -6.662874471  |
| H278 | 1.871830637  | -4.127950299  | -4.358725666  |
| H279 | 2.687596848  | -1.915158096  | -6.984532474  |
| H280 | 9.169975588  | 0.986297439   | -2.167178240  |
| H281 | 8.469492100  | -0.829145819  | -4.721493859  |
| H282 | 11.196872900 | -1.169528037  | -5.660670303  |
| H283 | 9.818154415  | -0.579361710  | -1.627387630  |
| H284 | 9.149392544  | 1.462836000   | -6.032402249  |
| H285 | -4.095510945 | -9.655024856  | 1.252777475   |
| H286 | -5.079549020 | -8.628321557  | 2.313592979   |
| H287 | -3.731528947 | -7.662343519  | 6.461738281   |
| H288 | -6.207316496 | -10.700144475 | 2.056012533   |
| H289 | -7.034933241 | -9.653533423  | 1.106328506   |
| H290 | 5.731951428  | -4.005832555  | 1.829775798   |

|       |              |               |              |
|-------|--------------|---------------|--------------|
| H291  | 8.678077765  | -3.425692531  | 1.487363677  |
| H292  | 7.464786851  | -6.457027024  | -1.277766473 |
| H293  | 6.376099328  | -2.799601371  | 0.670370610  |
| H294  | 9.148482440  | -4.987479629  | 1.604998966  |
| H295  | 2.073159967  | -8.606435311  | 0.171012008  |
| H296  | 7.077135603  | -5.781541346  | 0.774778858  |
| H297  | -2.744808913 | 2.325866235   | 9.298934388  |
| H298  | -3.748907245 | -0.437740114  | 10.172884854 |
| H299  | 0.171719998  | -7.639248228  | -0.608210371 |
| H300  | 2.640290035  | 0.026010919   | 5.112406829  |
| H301  | -1.366192798 | -7.874977381  | -3.844814676 |
| H302  | -3.704499025 | -3.058344467  | -1.674842832 |
| H303  | -0.437101329 | -6.398933819  | -3.557278145 |
| H304  | -0.881595560 | 2.176983371   | 7.301638550  |
| H305  | -1.468219162 | -6.602406407  | -1.114374955 |
| H306  | -2.124669505 | 1.181857435   | 6.523115600  |
| H307  | -3.735033267 | 1.197764012   | 8.343485980  |
| H308  | -1.845908040 | -0.497920493  | 8.450760058  |
| H309  | -0.831267909 | 0.704137044   | 9.266239003  |
| H310  | -4.646226376 | -2.592848407  | -6.326840359 |
| H311  | -4.694058771 | 2.303519499   | 10.929097757 |
| H312  | -7.689489600 | 1.650593867   | 10.847021269 |
| H313  | -1.334821207 | -3.860746508  | -1.592146375 |
| H314  | -6.178767595 | 3.167246454   | 12.828032297 |
| H315  | -7.218911195 | 3.695615185   | 11.678037834 |
| H316  | -0.529885829 | -0.637001432  | 6.341390427  |
| H317  | -0.008225129 | -4.011778468  | -3.642234888 |
| H318  | -4.781881195 | -2.644817078  | -3.879223559 |
| H319  | -6.841061475 | -4.059474893  | 9.853648249  |
| H320  | -6.055663730 | -5.791903596  | 7.182443248  |
| H321  | -5.104919935 | -2.426847578  | 8.947833112  |
| H322  | -8.062998600 | -4.503750024  | 8.991670679  |
| H323  | 0.749338479  | -10.749658429 | -1.065546449 |
| H324  | -2.506122289 | -2.924854286  | 7.289456320  |
| H325  | -5.955223159 | 0.532562655   | 5.674744293  |
| H326  | -3.188537655 | -7.766050196  | 0.374438720  |
| H327  | -7.485588354 | -1.112386207  | 6.384856910  |
| H328  | -7.413725747 | -6.640774443  | 2.578860831  |
| H329  | -5.627299634 | -4.888117047  | 2.120543179  |
| H330  | -7.417328537 | 1.201787956   | 12.535936289 |
| H331  | 1.482464398  | -1.234345669  | 5.445757476  |
| H332  | -2.124788737 | -2.969459838  | 9.623854303  |
| H333  | -1.042720552 | -3.448360440  | 7.362920881  |
| H334  | -2.193292561 | -1.395125110  | 11.385860745 |
| H335  | 0.731555205  | 2.744675350   | 6.117558173  |
| H336  | -7.394967709 | -3.962740121  | 5.256911370  |
| H337  | -6.856160988 | -3.540174716  | 6.888835846  |
| H338  | -7.847386228 | -1.589760340  | 4.717875588  |
| H339  | -3.514342217 | -5.538097386  | -0.560251583 |
| H340  | -1.087986659 | -3.624165056  | -5.878311420 |
| H341  | -3.122460850 | -2.944096770  | -7.185330891 |
| H342  | -4.398516438 | 0.086388273   | 4.955303023  |
| H343  | -3.505847386 | -2.969613967  | 10.338964733 |
| H344  | -5.516832189 | -2.060489968  | 10.388062243 |
| H345  | 2.242277989  | 2.190565715   | 5.616526699  |
| H346  | -7.295101454 | -7.530675873  | 4.983632905  |
| H347  | -4.456550520 | -5.231193435  | 6.710259374  |
| H348  | -4.960211274 | -6.171645971  | -1.403338887 |
| H349  | 2.782778757  | -8.509726877  | -1.457874991 |
| H350  | 3.916558880  | -0.482702490  | 7.760621796  |
| H351  | 3.745546958  | -2.036583094  | 6.908666384  |
| H352  | -5.085219157 | -9.304599885  | 7.457344481  |
| H353  | -6.280976255 | -8.243724851  | 7.812716115  |
| H354  | -4.743104468 | -5.648739476  | 11.331724951 |
| H355  | -5.497911442 | -5.947557994  | 9.202617933  |
| H356  | -4.174268257 | -8.310012095  | 11.116159376 |
| H357  | -3.124483068 | -5.450086122  | 10.629515453 |
| H358  | 4.366499548  | -3.391359855  | 9.180727300  |
| H359  | 11.845576001 | 3.115414980   | -6.754671434 |
| H360  | -0.987514630 | 0.345427731   | 13.526293382 |
| H361  | 0.664019673  | -0.675305357  | 11.542666449 |
| H362  | 9.754988594  | 2.154904547   | -8.729061904 |
| H363  | 8.921852237  | 3.957119583   | -6.369884627 |
| H364  | 8.877231164  | 4.410031856   | -8.084410168 |
| H365  | -3.850292991 | -0.375560521  | 2.074665564  |
| H366  | 3.271184757  | 1.255627376   | -8.788357345 |
| H367  | -2.705183666 | 0.375884661   | 1.138480501  |
| H368  | 0.518571837  | -0.649122248  | 3.027723878  |
| H369  | -2.675098620 | 0.548016309   | 2.765155980  |
| H370  | -0.992129629 | -0.404916841  | -0.351812121 |
| Mo371 | -3.430412713 | -3.554465456  | 4.188177057  |
| N372  | 0.031278924  | -0.829246507  | 2.135223095  |

|      |              |               |               |
|------|--------------|---------------|---------------|
| N373 | -2.850307812 | -0.124971582  | 2.015743234   |
| N374 | -8.933365736 | 4.340621738   | -2.502724788  |
| N375 | -6.448828352 | 6.675268867   | -4.039639465  |
| N376 | -5.535182641 | 8.616131984   | -2.228830524  |
| N377 | -5.275050025 | 7.282591165   | 0.240655510   |
| N378 | -3.031887081 | 5.680086824   | -0.346298966  |
| N379 | -1.003062791 | 7.714016570   | -0.648347297  |
| N380 | -1.040619456 | 9.242206513   | 1.825820095   |
| N381 | -1.265217346 | 7.314784464   | 3.902737260   |
| N382 | 0.092920659  | 4.869139725   | 3.312860403   |
| N383 | 2.845727205  | 5.133563350   | 2.030787215   |
| N384 | 3.534792531  | 7.708445669   | 3.096994175   |
| N385 | -6.463718987 | 3.031677664   | 11.855508739  |
| N386 | -4.702709463 | 1.286413186   | 10.799547297  |
| N387 | -0.225919793 | 0.314376735   | 6.568155631   |
| N388 | 1.403771645  | 1.964954140   | 6.153771100   |
| N389 | 1.699432226  | -0.220332369  | 5.407289835   |
| N390 | -1.932162045 | -0.524193806  | 11.900809659  |
| N391 | -5.602008350 | 0.967145458   | -4.424448035  |
| N392 | -6.650674383 | -0.937176268  | -0.198252215  |
| N393 | -3.213188233 | 1.471588473   | -5.395817182  |
| N394 | -2.634076463 | 3.494206964   | -7.244622726  |
| N395 | -1.774075881 | 5.615554486   | -5.602656127  |
| N396 | 0.664966451  | 4.720557790   | -4.520439360  |
| N397 | 0.692122586  | 0.531763249   | -4.016590879  |
| N398 | -0.724353722 | 0.975979215   | -2.359233934  |
| N399 | 2.962776066  | 5.160115474   | -5.985369857  |
| N400 | 4.035370487  | 5.500628158   | -10.595021084 |
| N401 | 6.081663144  | 6.344715607   | -10.755726580 |
| N402 | 6.234309200  | -2.960834585  | 7.433562455   |
| N403 | 8.333055643  | -4.372028403  | 1.678891534   |
| N404 | 7.889568830  | -5.596109915  | -1.612839231  |
| N405 | 6.307311017  | -4.540162780  | -3.631205815  |
| N406 | 3.062161571  | -2.861684329  | -7.204981092  |
| N407 | 4.143609471  | -4.172564734  | -8.821514421  |
| N408 | 4.441054203  | -1.877740156  | -8.789163614  |
| N409 | 5.463034015  | -1.943503834  | -2.737327684  |
| N410 | 7.934858411  | -0.655905250  | -2.537315518  |
| N411 | 9.438801211  | -0.528665227  | -4.828364084  |
| N412 | 7.377178299  | -2.818965990  | -7.338554964  |
| N413 | 9.874110353  | 1.461646675   | -6.745802419  |
| N414 | -6.145006069 | -10.153199268 | 1.194746508   |
| N415 | -4.051748921 | -7.515032419  | -0.114937723  |
| N416 | -1.795169903 | -6.937550794  | -2.040532694  |
| N417 | 0.693949998  | -8.167168810  | -1.315666123  |
| N418 | -6.595216925 | -7.197015029  | -4.088274135  |
| N419 | -4.981942896 | -5.286164943  | -5.492444400  |
| N420 | -5.545163959 | -8.449978583  | 7.129521064   |
| N421 | -5.061561167 | -5.220794457  | 4.172341251   |
| N422 | -6.713223467 | -6.359117330  | 3.259243769   |
| N423 | -4.596373304 | -6.388092358  | 9.403716405   |
| N424 | 2.454068727  | -0.038447706  | -1.762298969  |
| N425 | 1.865242989  | -0.486128928  | -0.935948141  |
| O426 | -6.322485445 | 5.497891086   | -2.091866509  |
| O427 | -3.393284279 | 7.896009321   | -2.518172839  |
| O428 | -3.978219368 | 9.003779967   | 0.997735789   |
| O429 | -2.511452044 | 5.729034788   | 1.867930050   |
| O430 | 0.455740737  | 6.135570723   | 0.092667160   |
| O431 | 1.235439021  | 9.197091828   | 1.643380242   |
| O432 | -0.312249016 | 8.816327746   | 5.357971083   |
| O433 | -0.098451470 | 4.275422669   | 5.527344107   |
| O434 | 3.230448809  | 3.782212640   | 3.840818482   |
| O435 | 5.528145607  | 6.768670763   | 3.648021167   |
| O436 | 4.754892886  | 9.162872760   | 6.135971828   |
| O437 | -6.052674627 | -0.541645349  | 11.229554089  |
| O438 | -2.188084789 | 1.752214064   | 12.084162222  |
| O439 | 1.237510141  | -1.444079998  | 13.342760022  |
| O440 | -2.878669901 | 3.318550110   | -4.062080428  |
| O441 | -6.620706950 | -0.818300168  | -2.469821334  |
| O442 | -0.404128833 | 3.124571486   | -6.935969759  |
| O443 | -0.619393018 | 0.151101742   | -7.664729542  |
| O444 | -1.312529468 | 6.877474291   | -7.465808290  |
| O445 | 0.903168955  | 6.657228224   | -3.331146205  |
| O446 | 4.232621136  | 4.931393730   | -4.105328561  |
| O447 | 5.859142421  | 7.167689111   | -6.308442719  |
| O448 | 4.746044167  | -1.791760850  | 10.390965355  |
| O449 | 6.573058792  | 1.043941264   | 2.389652797   |
| O450 | 8.425619660  | -3.433054979  | -1.131457223  |
| O451 | 8.006279045  | -4.702107118  | -5.168843544  |
| O452 | 5.414448808  | -1.394934348  | -4.958595595  |
| O453 | 6.887665860  | 1.355086208   | -2.889723328  |
| O454 | 6.428654655  | -0.562494262  | -0.039777526  |

|                                                                                                                                                                                                    |      |                                       |               |              |
|----------------------------------------------------------------------------------------------------------------------------------------------------------------------------------------------------|------|---------------------------------------|---------------|--------------|
|                                                                                                                                                                                                    | O455 | 11.318893259                          | 0.073323861   | -3.659100371 |
|                                                                                                                                                                                                    | O456 | 11.289635980                          | 0.119029573   | -7.924793680 |
|                                                                                                                                                                                                    | O457 | 8.101908500                           | -0.797006693  | -8.121217859 |
|                                                                                                                                                                                                    | O458 | 11.653052491                          | 3.965498416   | -8.603359900 |
|                                                                                                                                                                                                    | O459 | 3.696462762                           | 0.972148805   | -7.955841985 |
|                                                                                                                                                                                                    | O460 | -6.337396725                          | -7.742415587  | -0.151891614 |
|                                                                                                                                                                                                    | O461 | -3.633212938                          | -7.002619544  | -3.407090004 |
|                                                                                                                                                                                                    | O462 | 1.041493967                           | -8.718161423  | -3.494657337 |
|                                                                                                                                                                                                    | O463 | 2.757421617                           | -11.107322692 | -1.009119291 |
|                                                                                                                                                                                                    | O464 | -6.952849241                          | -4.478664412  | -6.304727480 |
|                                                                                                                                                                                                    | O465 | -8.378777312                          | -3.499373503  | -0.503740862 |
|                                                                                                                                                                                                    | O466 | -7.229967629                          | -5.264454663  | 0.236411782  |
|                                                                                                                                                                                                    | O467 | -2.139082758                          | -5.290848048  | -7.670735073 |
|                                                                                                                                                                                                    | O468 | -2.832253249                          | -7.670594217  | 8.791658761  |
|                                                                                                                                                                                                    | O469 | -2.708807921                          | -7.462777651  | 12.257367536 |
|                                                                                                                                                                                                    | O470 | -5.748702686                          | -0.502859189  | 2.547478381  |
|                                                                                                                                                                                                    | O471 | -6.364714863                          | 1.520188143   | 3.351466533  |
|                                                                                                                                                                                                    | O472 | -9.147748815                          | -4.061137801  | 7.701242397  |
|                                                                                                                                                                                                    | O473 | -9.925108918                          | -2.973112734  | 5.877555963  |
|                                                                                                                                                                                                    | O474 | -4.015854477                          | -2.989302758  | 6.229387350  |
|                                                                                                                                                                                                    | O475 | -5.030245218                          | -1.459393497  | 7.528501921  |
|                                                                                                                                                                                                    | O476 | -5.357532583                          | -2.392916771  | 4.095959635  |
|                                                                                                                                                                                                    | O477 | -2.527661642                          | -2.929981099  | 10.527146823 |
|                                                                                                                                                                                                    | O478 | -1.672670384                          | -2.861115651  | 7.820584005  |
|                                                                                                                                                                                                    | O479 | 1.858607886                           | -0.331987884  | -6.599958941 |
|                                                                                                                                                                                                    | O480 | -7.523117862                          | -4.765615568  | 9.797720583  |
|                                                                                                                                                                                                    | O481 | -5.209661549                          | -2.833998438  | 9.851714198  |
|                                                                                                                                                                                                    | S482 | 4.799650091                           | -4.296688890  | -0.410247919 |
|                                                                                                                                                                                                    | S483 | 1.243805981                           | -3.805865707  | -0.641948471 |
|                                                                                                                                                                                                    | S484 | -3.416919064                          | -3.342910891  | 1.821211887  |
|                                                                                                                                                                                                    | S485 | 2.703210599                           | -2.099865555  | 2.108718304  |
|                                                                                                                                                                                                    | S486 | -1.302074348                          | -1.715301773  | -0.137386141 |
|                                                                                                                                                                                                    | S487 | -1.110829887                          | -6.465979786  | 1.086151577  |
|                                                                                                                                                                                                    | S488 | -1.997490591                          | -1.602854060  | 4.422790085  |
|                                                                                                                                                                                                    | S489 | 2.345901178                           | -5.663933005  | 2.327857143  |
|                                                                                                                                                                                                    | S490 | -1.870404064                          | -5.272979893  | 4.543597498  |
|                                                                                                                                                                                                    | S491 | 1.192668341                           | -3.469046493  | 5.324361307  |
|                                                                                                                                                                                                    | end  |                                       |               |              |
| <b>Fe2-brNH-Fe6NH3-S2BH<br/>2N2 TS<br/>35, S=1/2<br/><br/>Fe( 139) -2.547<br/>Fe( 140) -0.477<br/>Fe( 141) -2.633<br/>Fe( 142) 2.561<br/>Fe( 143) 3.163<br/>Fe( 144) 2.251<br/>Fe( 145) -0.638</b> |      | <b>fe2brbhf6nh3s2bhdt2_2_53458.71</b> |               |              |
|                                                                                                                                                                                                    | C1   | -6.978986367                          | 5.841784720   | -3.098257332 |
|                                                                                                                                                                                                    | C2   | -8.437577209                          | 5.439439701   | -3.347861205 |
|                                                                                                                                                                                                    | C3   | -5.025842533                          | 7.010860854   | -4.031829904 |
|                                                                                                                                                                                                    | C4   | -4.579261470                          | 7.872996991   | -2.856499472 |
|                                                                                                                                                                                                    | C5   | -5.200778086                          | 9.371702705   | -1.032303559 |
|                                                                                                                                                                                                    | C6   | -4.759406426                          | 8.525668293   | 0.166887131  |
|                                                                                                                                                                                                    | C7   | -4.770895779                          | 6.341661758   | 1.256824193  |
|                                                                                                                                                                                                    | C8   | -3.337996931                          | 5.886241917   | 0.958370016  |
|                                                                                                                                                                                                    | C9   | -1.703937034                          | 5.356751251   | -0.796027981 |
|                                                                                                                                                                                                    | C10  | -0.668851500                          | 6.425174510   | -0.413794480 |
|                                                                                                                                                                                                    | C11  | -0.056029619                          | 8.763479761   | -0.360558871 |
|                                                                                                                                                                                                    | C12  | 0.109301384                           | 9.067046572   | 1.134154991  |
|                                                                                                                                                                                                    | C13  | -1.017207594                          | 9.668228369   | 3.220360989  |
|                                                                                                                                                                                                    | C14  | -0.818320552                          | 8.558392559   | 4.258583834  |
|                                                                                                                                                                                                    | C15  | -1.289728531                          | 6.209586469   | 4.818518242  |
|                                                                                                                                                                                                    | C16  | -0.326075290                          | 5.054048451   | 4.553867629  |
|                                                                                                                                                                                                    | C17  | 1.013277393                           | 3.780245699   | 2.886947326  |
|                                                                                                                                                                                                    | C18  | 2.488850146                           | 4.228524638   | 2.963623989  |
|                                                                                                                                                                                                    | C19  | 0.639212055                           | 3.214298490   | 1.504309814  |
|                                                                                                                                                                                                    | C20  | 1.616894298                           | 2.123570431   | 1.061603793  |
|                                                                                                                                                                                                    | C21  | -0.797216416                          | 2.688641961   | 1.518370933  |
|                                                                                                                                                                                                    | C22  | 4.251129640                           | 5.632268979   | 1.933859678  |
|                                                                                                                                                                                                    | C23  | 4.508866843                           | 6.739626288   | 2.966270846  |
|                                                                                                                                                                                                    | C24  | 4.581542866                           | 6.097173967   | 0.491347226  |
|                                                                                                                                                                                                    | C25  | 5.954746101                           | 6.777619671   | 0.414074806  |
|                                                                                                                                                                                                    | C26  | 4.512493155                           | 4.924716975   | -0.493859935 |
|                                                                                                                                                                                                    | C27  | 3.802124861                           | 8.850728606   | 3.927972535  |
|                                                                                                                                                                                                    | C28  | 4.137133535                           | 8.452664397   | 5.350917268  |
|                                                                                                                                                                                                    | C29  | -6.950749961                          | 1.669745321   | 11.650212677 |
|                                                                                                                                                                                                    | C30  | -5.855161897                          | 0.696576039   | 11.208354222 |
|                                                                                                                                                                                                    | C31  | -3.492937351                          | 0.601320476   | 10.394406603 |
|                                                                                                                                                                                                    | C32  | -2.475013310                          | 0.665475025   | 11.550523867 |
|                                                                                                                                                                                                    | C33  | -2.945878142                          | 1.244502822   | 9.105073463  |
|                                                                                                                                                                                                    | C34  | -1.674326203                          | 0.578442710   | 8.567664843  |
|                                                                                                                                                                                                    | C35  | -1.290769244                          | 1.124872152   | 7.186396193  |
|                                                                                                                                                                                                    | C36  | 0.931533657                           | 0.720244136   | 6.047598067  |
|                                                                                                                                                                                                    | C37  | -1.015116813                          | -0.636030411  | 13.023781811 |
|                                                                                                                                                                                                    | C38  | 0.401335611                           | -0.955503347  | 12.596957327 |
|                                                                                                                                                                                                    | C39  | -4.767305896                          | 1.839857177   | -3.583279251 |
|                                                                                                                                                                                                    | C40  | -3.514244597                          | 2.295359726   | -4.356611851 |
|                                                                                                                                                                                                    | C41  | -4.327133490                          | 1.107098224   | -2.297465721 |
|                                                                                                                                                                                                    | C42  | -5.430018594                          | 0.912721137   | -1.235609311 |

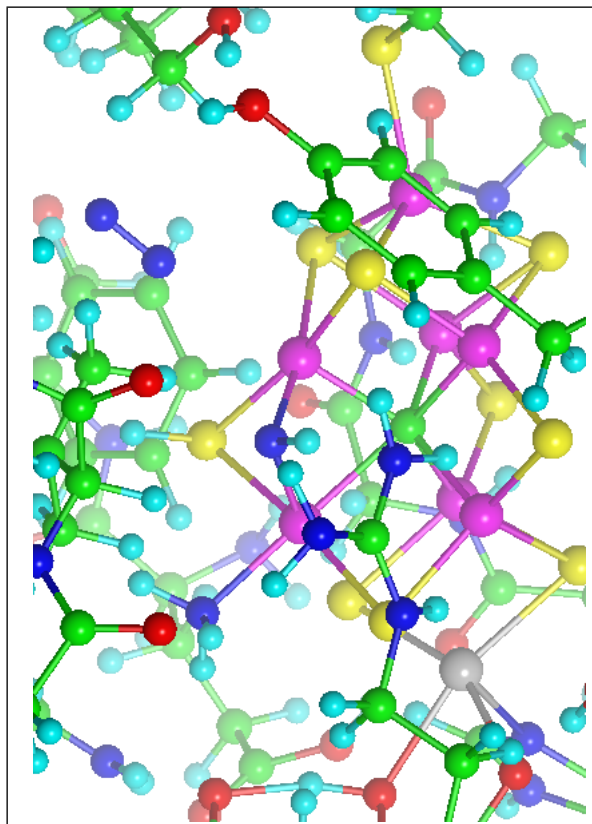

|      |              |               |               |
|------|--------------|---------------|---------------|
| C43  | -6.276251423 | -0.354632964  | -1.365735748  |
| C44  | -1.908976164 | 1.462129945   | -6.064931365  |
| C45  | -1.576615462 | 2.771522650   | -6.787743394  |
| C46  | -1.890467057 | 0.255477152   | -7.016229843  |
| C47  | -2.440527164 | 4.810043259   | -7.828938909  |
| C48  | -1.786679989 | 5.863404155   | -6.926212830  |
| C49  | -1.055887428 | 6.483764785   | -4.674162207  |
| C50  | 0.257879326  | 5.946946427   | -4.103927819  |
| C51  | 1.925492463  | 4.156467931   | -4.012067420  |
| C52  | 3.145143749  | 4.813449168   | -4.683866059  |
| C53  | 2.025693430  | 2.646737019   | -4.282497370  |
| C54  | 0.976349945  | 1.819079356   | -3.618037367  |
| C55  | 0.078506701  | 2.052931424   | -2.596880450  |
| C56  | -0.243870953 | 0.010436962   | -3.194940902  |
| C57  | 4.034241491  | 5.624813286   | -6.826657029  |
| C58  | 4.662593516  | 6.868914634   | -6.202966151  |
| C59  | 3.431740265  | 5.947166130   | -8.214155521  |
| C60  | 4.392730652  | 6.020764299   | -9.362336476  |
| C61  | 5.667954809  | 6.544894219   | -9.446200844  |
| C62  | 5.046588326  | 5.710964109   | -11.402917696 |
| C63  | 5.546849573  | -1.847281164  | 8.098277330   |
| C64  | 4.837756037  | -2.378160675  | 9.329296714   |
| C65  | 4.460680920  | -1.236010528  | 7.175057611   |
| C66  | 5.038745887  | -0.614083090  | 5.925923430   |
| C67  | 5.442951829  | 0.733055251   | 5.900127856   |
| C68  | 5.191638086  | -1.369823478  | 4.749359609   |
| C69  | 5.963149547  | 1.313334235   | 4.738302428   |
| C70  | 5.721853265  | -0.808607480  | 3.587153983   |
| C71  | 6.096196758  | 0.536834271   | 3.580111264   |
| C72  | 7.345401513  | -4.713240621  | 0.638982072   |
| C73  | 7.919850358  | -4.508920625  | -0.776479129  |
| C74  | 6.103681468  | -3.853148625  | 0.811465428   |
| C75  | 8.410650940  | -5.557347014  | -2.960550778  |
| C76  | 7.537436133  | -4.875822666  | -4.017759382  |
| C77  | 5.353892654  | -3.759301883  | -4.436123361  |
| C78  | 5.395017815  | -2.252654797  | -4.069647440  |
| C79  | 3.951566975  | -4.372314830  | -4.211912996  |
| C80  | 2.734793780  | -3.706894831  | -4.865166818  |
| C81  | 2.533622085  | -3.954039117  | -6.370306312  |
| C82  | 3.847771628  | -2.979040416  | -8.262780166  |
| C83  | 5.462850711  | -0.529631962  | -2.332464483  |
| C84  | 6.798710019  | 0.152745375   | -2.649706988  |
| C85  | 5.197643592  | -0.336190757  | -0.821898931  |
| C86  | 9.220236539  | -0.084581516  | -2.432513576  |
| C87  | 10.073336916 | -0.176416498  | -3.687267349  |
| C88  | 10.182800783 | -0.889489430  | -6.013114738  |
| C89  | 10.481163211 | 0.274407485   | -6.989874944  |
| C90  | 9.619362742  | -2.093832354  | -6.774734730  |
| C91  | 8.288320731  | -1.817126823  | -7.459796591  |
| C92  | 9.900472659  | 2.549770946   | -7.711173017  |
| C93  | 11.246401284 | 3.256690634   | -7.681861038  |
| C94  | 8.762982989  | 3.562242245   | -7.387501597  |
| C95  | 7.385284407  | 2.949375662   | -7.516205174  |
| C96  | 6.719142396  | 2.950519414   | -8.752417735  |
| C97  | 6.751649827  | 2.321905938   | -6.429984389  |
| C98  | 5.477266573  | 2.330896338   | -8.910082638  |
| C99  | 5.521157592  | 1.674334611   | -6.573866586  |
| C100 | 4.896860450  | 1.680854931   | -7.819499751  |
| C101 | -5.076800289 | -9.158519505  | 1.329264211   |
| C102 | -5.209210599 | -8.078479665  | 0.270374574   |
| C103 | -3.951125168 | -6.399630073  | -1.059899685  |
| C104 | -3.110713771 | -6.783220370  | -2.284279893  |
| C105 | -0.835092826 | -7.284120548  | -3.063505382  |
| C106 | 0.371333286  | -8.110892259  | -2.629717572  |
| C107 | 1.911491294  | -8.835659914  | -0.890500709  |
| C108 | 1.789751239  | -10.343990129 | -0.981834824  |
| C109 | -7.063032350 | -5.820490354  | -4.299801069  |
| C110 | -6.332639352 | -5.140469682  | -5.462763313  |
| C111 | -7.076294653 | -4.894438175  | -3.063897739  |
| C112 | -8.124348921 | -5.359831647  | -2.035226476  |
| C113 | -7.951097608 | -4.626614195  | -0.723932694  |
| C114 | -4.208410105 | -4.675919807  | -6.571526427  |
| C115 | -3.110728789 | -5.618930958  | -7.022834900  |
| C116 | -3.748492435 | -3.215498318  | -6.335531409  |
| C117 | -3.020206791 | -3.137971200  | -5.027941686  |
| C118 | -1.663444666 | -3.488331574  | -4.948909571  |
| C119 | -3.749415195 | -2.945632527  | -3.840418391  |
| C120 | -1.080073002 | -3.744617925  | -3.705753534  |
| C121 | -3.164178662 | -3.205915637  | -2.601572347  |
| C122 | -1.842100799 | -3.657320206  | -2.540591731  |
| C123 | -4.549137582 | -7.356172496  | 7.121006466   |
| C124 | -3.912123167 | -7.136443228  | 8.499913328   |



|       |              |              |              |
|-------|--------------|--------------|--------------|
| C125  | -5.178686458 | -6.062755365 | 6.581063127  |
| C126  | -5.596618133 | -6.084755752 | 5.145321426  |
| C127  | -6.625018300 | -6.802751137 | 4.571768726  |
| C128  | -5.765991833 | -5.428315457 | 3.062533848  |
| C129  | -3.990704773 | -6.132377367 | 10.701603594 |
| C130  | -3.572913619 | -7.408781088 | 11.396942575 |
| C131  | -5.922297115 | 0.341343838  | 3.495362432  |
| C132  | -5.488971082 | -0.120655176 | 4.900606286  |
| C133  | -5.750805318 | -1.615731156 | 5.226616166  |
| C134  | -7.236829002 | -1.858784492 | 5.578315886  |
| C135  | -7.560473901 | -3.272432106 | 6.070982276  |
| C136  | -9.007789543 | -3.438736189 | 6.585872183  |
| C137  | -4.882508708 | -2.040366285 | 6.422454254  |
| C138  | -0.190751269 | -3.496614319 | 2.288928240  |
| Fe139 | -1.754483716 | -4.759410191 | 2.352850060  |
| Fe140 | 0.641544097  | -2.252764049 | 1.024480230  |
| Fe141 | 1.597158667  | -3.783590372 | 3.192507021  |
| Fe142 | 0.498330615  | -4.961044353 | 1.195059004  |
| Fe143 | 2.967680046  | -4.087640074 | 0.951038847  |
| Fe144 | -0.698113540 | -3.398475486 | 4.220710447  |
| Fe145 | -1.496817818 | -1.741852680 | 2.137102351  |
| H146  | -8.805474020 | 4.564725099  | -1.542305213 |
| H147  | -8.424334240 | 3.497076181  | -2.715342209 |
| H148  | -6.966883912 | 6.842376369  | -4.894177009 |
| H149  | -8.561239475 | 5.187022965  | -4.413211288 |
| H150  | -9.049914714 | 6.341493808  | -3.176613554 |
| H151  | -4.403968177 | 6.103077863  | -4.006741608 |
| H152  | -6.487585585 | 8.544618292  | -2.547158082 |
| H153  | -4.791073795 | 7.549651847  | -4.959155188 |
| H154  | -6.082442283 | 9.959924917  | -0.746624215 |
| H155  | -5.863569437 | 6.908579449  | -0.494278475 |
| H156  | -4.377972378 | 10.069369003 | -1.239118870 |
| H157  | -1.363352754 | 4.407782901  | -0.369164964 |
| H158  | -3.784012799 | 5.790303589  | -1.040038321 |
| H159  | -5.433247674 | 5.465772537  | 1.288920951  |
| H160  | 0.929926414  | 8.473141811  | -0.743934772 |
| H161  | -1.878990884 | 7.921999761  | -1.156625923 |
| H162  | -4.765078378 | 6.807653246  | 2.249273124  |
| H163  | -1.740458189 | 5.245144737  | -1.887559774 |
| H164  | -1.949313723 | 9.175386081  | 1.356506730  |
| H165  | -0.381859155 | 9.678614434  | -0.873515301 |
| H166  | -1.523301922 | 3.487371327  | 1.721855765  |
| H167  | -1.036241414 | 2.229636103  | 0.545923443  |
| H168  | -0.898386266 | 1.913303698  | 2.289697396  |
| H169  | 0.695483228  | 4.043014100  | 0.780681674  |
| H170  | -1.969393519 | 10.167319073 | 3.450756895  |
| H171  | 3.536222889  | 4.419730213  | -0.474726781 |
| H172  | 2.746551527  | 7.735356587  | 2.458584772  |
| H173  | 6.012333296  | 7.678141256  | 1.041998882  |
| H174  | 1.380857816  | 1.835700004  | 0.029892714  |
| H175  | 1.517186250  | 1.219612315  | 1.680613724  |
| H176  | 6.215408166  | -1.028217421 | 8.424854526  |
| H177  | 4.680968147  | 5.276722883  | -1.521383865 |
| H178  | 6.160685124  | 7.072871018  | -0.625369477 |
| H179  | 5.288228036  | 4.177611966  | -0.260896372 |
| H180  | 6.751684949  | 6.089172864  | 0.736540146  |
| H181  | 3.817978354  | 6.842942209  | 0.201318474  |
| H182  | 4.930030462  | 4.813461615  | 2.216058843  |
| H183  | 2.199831306  | 5.451222685  | 1.327716532  |
| H184  | 2.665467207  | 2.455909218  | 1.082228223  |
| H185  | 4.418055275  | -1.041430437 | -0.497283174 |
| H186  | 4.821258036  | 0.690738973  | -0.694598317 |
| H187  | 6.346271621  | 0.057163150  | 0.725356980  |
| H188  | 6.762905324  | 2.005081324  | 2.498484476  |
| H189  | 5.812144903  | -1.400543289 | 2.676844966  |
| H190  | 4.859921184  | -2.410161274 | 4.729230094  |
| H191  | 5.333547737  | 1.348775723  | 6.796561428  |
| H192  | -0.221449773 | 5.503670144  | 2.558641467  |
| H193  | -2.299535784 | 5.770558082  | 4.836233349  |
| H194  | -1.064392059 | 6.585796963  | 5.823271718  |
| H195  | -1.758916179 | 7.203083807  | 3.010023189  |
| H196  | -0.204806870 | 10.390440524 | 3.374540091  |
| H197  | 6.245309420  | 2.369365478  | 4.729729881  |
| H198  | 0.906210064  | 2.993310844  | 3.643735722  |
| H199  | 4.608829849  | 9.497396142  | 3.545376534  |
| H200  | 2.876100455  | 9.445075602  | 3.956825346  |
| H201  | 3.703989230  | 7.482029590  | 5.687426844  |
| H202  | -1.352406945 | -1.387038783 | 13.754805403 |
| H203  | -7.246069577 | -1.767157554 | -0.259101503 |
| H204  | -5.443050930 | -1.736550666 | 3.271875935  |
| H205  | -9.131034655 | -5.143556005 | -2.420696731 |
| H206  | -8.043934844 | -6.444720953 | -1.873925406 |

|      |              |               |               |
|------|--------------|---------------|---------------|
| H207 | -7.305479288 | -3.859944636  | -3.362846226  |
| H208 | -3.286568118 | -6.690339796  | -6.765693529  |
| H209 | -8.100208860 | -5.896471188  | -4.661182984  |
| H210 | -3.887677930 | 0.136808915   | -2.577595065  |
| H211 | -6.128375720 | 1.767750434   | -1.256435100  |
| H212 | -4.488864422 | -5.779191036  | -4.750038293  |
| H213 | -4.900492110 | -4.651532984  | -7.439425020  |
| H214 | -5.660583918 | -7.205550509  | -3.640759651  |
| H215 | -6.331222785 | -0.618779865  | 0.718882069   |
| H216 | -6.070921741 | -4.876281282  | -2.616200205  |
| H217 | -7.224865770 | -7.694098214  | -3.477016299  |
| H218 | -6.295642069 | 1.523871344   | -4.935443677  |
| H219 | -3.513607998 | 1.690188665   | -1.844301829  |
| H220 | -6.937899569 | -6.176616786  | -0.067600550  |
| H221 | -4.975438475 | 0.931996162   | -0.234385901  |
| H222 | 2.015644043  | 4.366545348   | -2.937412724  |
| H223 | -0.076351837 | 2.977480051   | -2.049083207  |
| H224 | -0.807901602 | 7.406301810   | -5.216982334  |
| H225 | -2.193711729 | 4.753822226   | -5.210944123  |
| H226 | 2.011095712  | 5.092603932   | -6.370731983  |
| H227 | 6.313851934  | 7.011370117   | -8.709856073  |
| H228 | 3.930911273  | 7.514401819   | -5.659050212  |
| H229 | 2.832782519  | 6.872045362   | -8.139176760  |
| H230 | 4.808254706  | 4.846706732   | -6.918517963  |
| H231 | 5.103626829  | 5.431073306   | -12.451495909 |
| H232 | 3.028500330  | 2.328192175   | -3.950894613  |
| H233 | 1.988011643  | 2.481526273   | -5.372221215  |
| H234 | 6.966900629  | 6.596656200   | -11.144349390 |
| H235 | 2.720525925  | 5.141263655   | -8.455445045  |
| H236 | 0.113887625  | 4.167188298   | -5.170940463  |
| H237 | -1.695522292 | 6.777439685   | -3.827901025  |
| H238 | -1.801763687 | 4.743371451   | -8.720912977  |
| H239 | -0.592836802 | -1.017940215  | -3.258141992  |
| H240 | -3.419233594 | 5.190196169   | -8.149468222  |
| H241 | 7.084547843  | -3.195130375  | 7.943750030   |
| H242 | 6.530687811  | -2.665387621  | 6.499514201   |
| H243 | 5.247765869  | -2.654919705  | -2.018513057  |
| H244 | 4.693897253  | 0.023611622   | -2.889287243  |
| H245 | 7.762136352  | -1.581246199  | -2.132538796  |
| H246 | 1.233650597  | 0.035065956   | -4.770674110  |
| H247 | 0.969577747  | -0.130834813  | -6.988318554  |
| H248 | -0.717883765 | -0.452189984  | -8.417291440  |
| H249 | 2.479230639  | 0.350696954   | -6.937282760  |
| H250 | -2.083790563 | -0.650996044  | -6.419055564  |
| H251 | -2.686919920 | 0.367732115   | -7.768660627  |
| H252 | 9.561458557  | -2.962193461  | -6.103401920  |
| H253 | 10.343818847 | -2.332713565  | -7.568409311  |
| H254 | 7.469860564  | -3.502097349  | -6.579497382  |
| H255 | 6.413190082  | -2.529462894  | -7.601892904  |
| H256 | 4.954249183  | -4.260194477  | -9.421913798  |
| H257 | 1.461367998  | -4.063573156  | -6.591672231  |
| H258 | 4.969553531  | 2.352746955   | -9.878383098  |
| H259 | 7.206667667  | 2.334442047   | -5.436139700  |
| H260 | 4.198131203  | -0.952080395  | -8.404234992  |
| H261 | 3.768725156  | -4.382092190  | -3.124999072  |
| H262 | 6.017567971  | -4.735398709  | -2.660054117  |
| H263 | 2.716137711  | -2.624645527  | -4.661044229  |
| H264 | -3.565672785 | 3.169151188   | -7.020441337  |
| H265 | 8.594547693  | -6.587660948  | -3.293280076  |
| H266 | -3.891496555 | 0.711283421   | -5.494411574  |
| H267 | 3.998192486  | -5.429009614  | -4.523078267  |
| H268 | 5.075635252  | 1.147152533   | -5.730071757  |
| H269 | 9.373441924  | -5.026305927  | -2.966765941  |
| H270 | 3.735232022  | -5.027419709  | -8.460707248  |
| H271 | 4.724601263  | -1.895946708  | -9.758433974  |
| H272 | -6.084980269 | 0.279953736   | -3.837858735  |
| H273 | -5.274623117 | 2.775528844   | -3.280100976  |
| H274 | 7.173685111  | 3.445592893   | -9.613455997  |
| H275 | -1.105194827 | 1.339289632   | -5.325019255  |
| H276 | 5.655913522  | -3.829469761  | -5.484958112  |
| H277 | 3.012870453  | -4.899902334  | -6.655319130  |
| H278 | 1.856062913  | -4.121706959  | -4.354526650  |
| H279 | 2.677000822  | -1.916225886  | -6.981704591  |
| H280 | 9.135771037  | 0.979424140   | -2.164024888  |
| H281 | 8.447519484  | -0.838497947  | -4.736062211  |
| H282 | 11.182314219 | -1.177999318  | -5.652230022  |
| H283 | 9.770692409  | -0.593343180  | -1.629911342  |
| H284 | 9.134835170  | 1.454559316   | -6.035687819  |
| H285 | -4.095546133 | -9.649095019  | 1.244962000   |
| H286 | -5.087265741 | -8.627486291  | 2.303243180   |
| H287 | -3.716562868 | -7.655789540  | 6.467055646   |
| H288 | -6.209504920 | -10.699490759 | 2.039726067   |

|      |              |               |              |
|------|--------------|---------------|--------------|
| H289 | -7.033840936 | -9.655585469  | 1.084134861  |
| H290 | 5.725347973  | -3.991919839  | 1.832671001  |
| H291 | 8.663585193  | -3.404678188  | 1.488623986  |
| H292 | 7.459651796  | -6.452975911  | -1.269063379 |
| H293 | 6.357787298  | -2.793909972  | 0.662685418  |
| H294 | 9.145855877  | -4.963220281  | 1.601503186  |
| H295 | 2.092085203  | -8.578006420  | 0.165545522  |
| H296 | 7.072464802  | -5.770880285  | 0.780697350  |
| H297 | -2.764818290 | 2.315277535   | 9.298028758  |
| H298 | -3.764283969 | -0.442750493  | 10.193434681 |
| H299 | 0.182218965  | -7.622875386  | -0.604696040 |
| H300 | 2.637713378  | 0.085953719   | 5.118779383  |
| H301 | -1.360682323 | -7.853759885  | -3.839545801 |
| H302 | -3.734349028 | -3.060669242  | -1.681676308 |
| H303 | -0.436505986 | -6.376559868  | -3.549443352 |
| H304 | -0.968274093 | 2.170462233   | 7.254665446  |
| H305 | -1.467456990 | -6.598994864  | -1.102511766 |
| H306 | -2.168785950 | 1.098497077   | 6.519666062  |
| H307 | -3.747955750 | 1.172195728   | 8.353378812  |
| H308 | -1.831072549 | -0.507437587  | 8.481736542  |
| H309 | -0.830985549 | 0.730620798   | 9.260386561  |
| H310 | -4.642594572 | -2.575411022  | -6.338193643 |
| H311 | -4.693509934 | 2.305185009   | 10.947339019 |
| H312 | -7.698401926 | 1.670620120   | 10.842516203 |
| H313 | -1.379308501 | -3.905436203  | -1.588276537 |
| H314 | -6.193219560 | 3.171344637   | 12.838616628 |
| H315 | -7.222290390 | 3.709280816   | 11.683593396 |
| H316 | -0.528780744 | -0.633545163  | 6.307269718  |
| H317 | -0.030401447 | -4.030253725  | -3.626688823 |
| H318 | -4.790209985 | -2.617262658  | -3.891825340 |
| H319 | -6.858558380 | -4.056728222  | 9.848035917  |
| H320 | -6.068270778 | -5.819430425  | 7.187195487  |
| H321 | -5.121338805 | -2.429144607  | 8.946509087  |
| H322 | -8.082638985 | -4.499334919  | 8.986381125  |
| H323 | 0.740991066  | -10.727193100 | -1.020879441 |
| H324 | -2.515580476 | -2.924986577  | 7.293342260  |
| H325 | -5.963154054 | 0.511882084   | 5.660386738  |
| H326 | -3.190233724 | -7.753498832  | 0.376234446  |
| H327 | -7.493760704 | -1.133997413  | 6.366271363  |
| H328 | -7.413636506 | -6.657623031  | 2.585739197  |
| H329 | -5.626876951 | -4.904546860  | 2.124740866  |
| H330 | -7.435070571 | 1.213153895   | 12.530027129 |
| H331 | 1.487081132  | -1.188064772  | 5.419214751  |
| H332 | -2.138351995 | -2.972090934  | 9.629120718  |
| H333 | -1.046848587 | -3.435894697  | 7.358628773  |
| H334 | -2.202755418 | -1.398173296  | 11.398273555 |
| H335 | 0.704313331  | 2.761108214   | 6.203167438  |
| H336 | -7.416766839 | -3.988214532  | 5.246270704  |
| H337 | -6.871573274 | -3.565017151  | 6.875648071  |
| H338 | -7.852038822 | -1.613830579  | 4.698688419  |
| H339 | -3.513755977 | -5.527204711  | -0.549597086 |
| H340 | -1.087327751 | -3.610757723  | -5.868915465 |
| H341 | -3.113956236 | -2.929768998  | -7.188653306 |
| H342 | -4.401439174 | 0.060563859   | 4.950542776  |
| H343 | -3.522282252 | -2.966815984  | 10.341233643 |
| H344 | -5.535707495 | -2.057360752  | 10.385064422 |
| H345 | 2.198635554  | 2.245748546   | 5.633439945  |
| H346 | -7.297149953 | -7.541833559  | 4.991252791  |
| H347 | -4.474157162 | -5.233373333  | 6.723215475  |
| H348 | -4.958166524 | -6.153284273  | -1.400616004 |
| H349 | 2.787055786  | -8.508297672  | -1.471643060 |
| H350 | 3.915189994  | -0.478536268  | 7.757965243  |
| H351 | 3.748338986  | -2.032046070  | 6.903916052  |
| H352 | -5.046838125 | -9.316891752  | 7.459689785  |
| H353 | -6.255721720 | -8.273524130  | 7.820804311  |
| H354 | -4.752177364 | -5.651162637  | 11.336133758 |
| H355 | -5.496700015 | -5.950920706  | 9.201729107  |
| H356 | -4.169295378 | -8.310232490  | 11.117650928 |
| H357 | -3.132318192 | -5.444764370  | 10.638451505 |
| H358 | 4.365173510  | -3.379761502  | 9.185524647  |
| H359 | 11.827605110 | 3.124441964   | -6.737950968 |
| H360 | -0.986833400 | 0.343892327   | 13.531987609 |
| H361 | 0.649456584  | -0.686804789  | 11.541072694 |
| H362 | 9.751111657  | 2.151780497   | -8.727862732 |
| H363 | 8.914923375  | 3.954725018   | -6.369810216 |
| H364 | 8.872164071  | 4.405610718   | -8.084555716 |
| H365 | -3.714147697 | -0.317795200  | 2.011106458  |
| H366 | 3.258745543  | 1.266105351   | -8.788547232 |
| H367 | -2.475928932 | 0.455605068   | 1.207781126  |
| H368 | 0.631189929  | -0.698680459  | 2.999450530  |
| H369 | -2.543160723 | 0.480270182   | 2.844200235  |
| H370 | -0.949364843 | -0.475679260  | -0.412864852 |

|       |              |               |               |
|-------|--------------|---------------|---------------|
| Mo371 | -3.429488271 | -3.564965477  | 4.188714368   |
| N372  | 0.126518407  | -0.845261075  | 2.110540819   |
| N373  | -2.706749113 | -0.106710681  | 2.025846921   |
| N374  | -8.953694877 | 4.352985664   | -2.532189372  |
| N375  | -6.438631846 | 6.667961760   | -4.043117178  |
| N376  | -5.526161277 | 8.599908978   | -2.220191301  |
| N377  | -5.280149947 | 7.274904669   | 0.261149079   |
| N378  | -3.053306862 | 5.663013734   | -0.345277479  |
| N379  | -1.021512734 | 7.712210894   | -0.640462853  |
| N380  | -1.044811717 | 9.250353870   | 1.829358483   |
| N381  | -1.262138294 | 7.324478125   | 3.894479021   |
| N382  | 0.118581310  | 4.876566311   | 3.286880981   |
| N383  | 2.881316315  | 5.125134684   | 2.014397850   |
| N384  | 3.561555053  | 7.707152974   | 3.071188921   |
| N385  | -6.471092187 | 3.041348018   | 11.863299174  |
| N386  | -4.709878254 | 1.288977445   | 10.811763932  |
| N387  | -0.238221595 | 0.316091821   | 6.559638293   |
| N388  | 1.381809692  | 1.988549617   | 6.190195814   |
| N389  | 1.691090790  | -0.172501460  | 5.384620656   |
| N390  | -1.941120926 | -0.527534827  | 11.913225614  |
| N391  | -5.595293969 | 0.973645241   | -4.432888227  |
| N392  | -6.654886525 | -0.932099834  | -0.209957499  |
| N393  | -3.199331978 | 1.471603417   | -5.391663119  |
| N394  | -2.627510024 | 3.498379667   | -7.236684161  |
| N395  | -1.771929730 | 5.613733635   | -5.588252146  |
| N396  | 0.664886822  | 4.706975695   | -4.498533643  |
| N397  | 0.753267749  | 0.505522002   | -3.990183505  |
| N398  | -0.672260501 | 0.926059687   | -2.335278247  |
| N399  | 2.946565052  | 5.167089145   | -5.978847691  |
| N400  | 4.015762474  | 5.504314957   | -10.592066104 |
| N401  | 6.067413985  | 6.335899227   | -10.749407452 |
| N402  | 6.230346908  | -2.958906229  | 7.433039794   |
| N403  | 8.326164241  | -4.354242628  | 1.677195951   |
| N404  | 7.877040782  | -5.590693583  | -1.610027847  |
| N405  | 6.292514419  | -4.534290964  | -3.629345240  |
| N406  | 3.054994693  | -2.862167163  | -7.199878573  |
| N407  | 4.146658559  | -4.170841567  | -8.813272470  |
| N408  | 4.426312336  | -1.873671145  | -8.787160462  |
| N409  | 5.423657364  | -1.934791519  | -2.743612566  |
| N410  | 7.892916412  | -0.654713307  | -2.547193000  |
| N411  | 9.417285887  | -0.535943162  | -4.832965000  |
| N412  | 7.354109923  | -2.797962074  | -7.319911182  |
| N413  | 9.864515155  | 1.457255753   | -6.744275997  |
| N414  | -6.143324479 | -10.153252491 | 1.178169641   |
| N415  | -4.052682587 | -7.505960778  | -0.117730812  |
| N416  | -1.792484377 | -6.922754992  | -2.033342476  |
| N417  | 0.703132461  | -8.149034868  | -1.314262139  |
| N418  | -6.582275890 | -7.193257347  | -4.094318355  |
| N419  | -4.976444856 | -5.269094759  | -5.493779767  |
| N420  | -5.519091359 | -8.467791990  | 7.134981318   |
| N421  | -5.062871782 | -5.233342431  | 4.178027961   |
| N422  | -6.712490220 | -6.374929952  | 3.264895415   |
| N423  | -4.595923163 | -6.390355890  | 9.407871026   |
| N424  | 2.321348999  | -0.156556777  | -1.519110423  |
| N425  | 1.804333402  | -0.698208622  | -0.703367247  |
| O426  | -6.339105712 | 5.492213791   | -2.092393375  |
| O427  | -3.383777519 | 7.883353002   | -2.512709319  |
| O428  | -3.973465553 | 8.992642017   | 1.007643345   |
| O429  | -2.494102764 | 5.741020831   | 1.859785611   |
| O430  | 0.430126464  | 6.116947020   | 0.075129844   |
| O431  | 1.231154151  | 9.175183989   | 1.654661907   |
| O432  | -0.324143175 | 8.823708025   | 5.362715184   |
| O433  | -0.041150584 | 4.306250419   | 5.507647117   |
| O434  | 3.252832927  | 3.775795518   | 3.829803697   |
| O435  | 5.544559727  | 6.765080765   | 3.650714666   |
| O436  | 4.778185742  | 9.166943297   | 6.107398749   |
| O437  | -6.076977611 | -0.531634273  | 11.217706669  |
| O438  | -2.198151870 | 1.748957473   | 12.096618497  |
| O439  | 1.233848018  | -1.451255049  | 13.339990484  |
| O440  | -2.868717177 | 3.318102019   | -4.056581057  |
| O441  | -6.621654934 | -0.809149201  | -2.481637748  |
| O442  | -0.396171911 | 3.138933634   | -6.924356358  |
| O443  | -0.611007811 | 0.166315163   | -7.672705174  |
| O444  | -1.317537804 | 6.886695929   | -7.445889836  |
| O445  | 0.906684815  | 6.645117715   | -3.313536883  |
| O446  | 4.236441464  | 4.925238092   | -4.115251212  |
| O447  | 5.836851062  | 7.181345878   | -6.311114897  |
| O448  | 4.757042185  | -1.780407795  | 10.392756657  |
| O449  | 6.580734467  | 1.053469904   | 2.392520848   |
| O450  | 8.400931084  | -3.421913815  | -1.139912328  |
| O451  | 7.995412095  | -4.686365978  | -5.162463622  |
| O452  | 5.406932279  | -1.394512822  | -4.966560767  |

|                                                                                                                                                                                                                                                             |                                 |              |               |              |
|-------------------------------------------------------------------------------------------------------------------------------------------------------------------------------------------------------------------------------------------------------------|---------------------------------|--------------|---------------|--------------|
|                                                                                                                                                                                                                                                             | O453                            | 6.855702718  | 1.360332732   | -2.912661408 |
|                                                                                                                                                                                                                                                             | O454                            | 6.387702192  | -0.533446695  | -0.054195466 |
|                                                                                                                                                                                                                                                             | O455                            | 11.284540249 | 0.074285546   | -3.649274649 |
|                                                                                                                                                                                                                                                             | O456                            | 11.291063126 | 0.118463706   | -7.915021123 |
|                                                                                                                                                                                                                                                             | O457                            | 8.096401364  | -0.794792637  | -8.133220791 |
|                                                                                                                                                                                                                                                             | O458                            | 11.658011605 | 3.944986488   | -8.602753102 |
|                                                                                                                                                                                                                                                             | O459                            | 3.686299307  | 0.978061262   | -7.958841429 |
|                                                                                                                                                                                                                                                             | O460                            | -6.338274007 | -7.738266189  | -0.162223459 |
|                                                                                                                                                                                                                                                             | O461                            | -3.626034786 | -6.974257160  | -3.406337904 |
|                                                                                                                                                                                                                                                             | O462                            | 1.046737699  | -8.692164815  | -3.496357761 |
|                                                                                                                                                                                                                                                             | O463                            | 2.747932507  | -11.100074200 | -0.979832317 |
|                                                                                                                                                                                                                                                             | O464                            | -6.952854101 | -4.490367528  | -6.321491054 |
|                                                                                                                                                                                                                                                             | O465                            | -8.382994583 | -3.498381873  | -0.516559418 |
|                                                                                                                                                                                                                                                             | O466                            | -7.233330740 | -5.261511966  | 0.227116495  |
|                                                                                                                                                                                                                                                             | O467                            | -2.127525803 | -5.275889082  | -7.662849841 |
|                                                                                                                                                                                                                                                             | O468                            | -2.822340652 | -7.663142454  | 8.801038056  |
|                                                                                                                                                                                                                                                             | O469                            | -2.709464739 | -7.459878192  | 12.262552281 |
|                                                                                                                                                                                                                                                             | O470                            | -5.687138317 | -0.514075464  | 2.530090230  |
|                                                                                                                                                                                                                                                             | O471                            | -6.381907170 | 1.484463017   | 3.332668667  |
|                                                                                                                                                                                                                                                             | O472                            | -9.166108276 | -4.057927821  | 7.696628996  |
|                                                                                                                                                                                                                                                             | O473                            | -9.937558811 | -2.978850698  | 5.865307923  |
|                                                                                                                                                                                                                                                             | O474                            | -4.015536812 | -2.995338937  | 6.227517592  |
|                                                                                                                                                                                                                                                             | O475                            | -5.052126184 | -1.474663916  | 7.520707566  |
|                                                                                                                                                                                                                                                             | O476                            | -5.355205387 | -2.408326708  | 4.083262382  |
|                                                                                                                                                                                                                                                             | O477                            | -2.544207538 | -2.929055984  | 10.530725432 |
|                                                                                                                                                                                                                                                             | O478                            | -1.683255856 | -2.863832180  | 7.826519499  |
|                                                                                                                                                                                                                                                             | O479                            | 1.858125453  | -0.329659989  | -6.593357754 |
|                                                                                                                                                                                                                                                             | O480                            | -7.542050911 | -4.761307770  | 9.791950601  |
|                                                                                                                                                                                                                                                             | O481                            | -5.224993897 | -2.831950487  | 9.852440847  |
|                                                                                                                                                                                                                                                             | S482                            | 4.788149273  | -4.307189117  | -0.398185637 |
|                                                                                                                                                                                                                                                             | S483                            | 1.275020368  | -3.904390789  | -0.635174375 |
|                                                                                                                                                                                                                                                             | S484                            | -3.402903091 | -3.330636480  | 1.823529433  |
|                                                                                                                                                                                                                                                             | S485                            | 2.762989092  | -2.201688907  | 2.124295118  |
|                                                                                                                                                                                                                                                             | S486                            | -1.265344777 | -1.774205887  | -0.135208770 |
|                                                                                                                                                                                                                                                             | S487                            | -1.138356445 | -6.493459382  | 1.113351481  |
|                                                                                                                                                                                                                                                             | S488                            | -1.975382721 | -1.618904355  | 4.418727363  |
|                                                                                                                                                                                                                                                             | S489                            | 2.301736767  | -5.746201443  | 2.374396120  |
|                                                                                                                                                                                                                                                             | S490                            | -1.875417634 | -5.286032977  | 4.552722027  |
|                                                                                                                                                                                                                                                             | S491                            | 1.193759176  | -3.466210803  | 5.342710994  |
|                                                                                                                                                                                                                                                             | end                             |              |               |              |
| <b>Fe2-brNH-Fe6-S2BH</b><br><b>2N2 associated</b><br><b>35, S=1/2</b><br><br><b>Fe( 139) -2.529</b><br><b>Fe( 140) 0.104</b><br><b>Fe( 141) -2.582</b><br><b>Fe( 142) 2.619</b><br><b>Fe( 143) 2.684</b><br><b>Fe( 144) 1.981</b><br><b>Fe( 145) -0.456</b> | <b>bm602b26nh2n2x3dta.car_2</b> |              |               |              |
|                                                                                                                                                                                                                                                             | C1                              | -2.005799064 | -6.207511528  | -7.103215896 |
|                                                                                                                                                                                                                                                             | C2                              | -1.179754163 | -6.341340432  | -8.388053525 |
|                                                                                                                                                                                                                                                             | C3                              | -4.268783607 | -5.940087173  | -6.177384913 |
|                                                                                                                                                                                                                                                             | C4                              | -4.281746467 | -6.976041794  | -5.058015302 |
|                                                                                                                                                                                                                                                             | C5                              | -3.706949530 | -9.235986777  | -4.330822408 |
|                                                                                                                                                                                                                                                             | C6                              | -2.654301795 | -8.892463545  | -3.269289128 |
|                                                                                                                                                                                                                                                             | C7                              | -0.624997553 | -7.648239788  | -2.727064123 |
|                                                                                                                                                                                                                                                             | C8                              | -1.202442923 | -6.579825112  | -1.795794899 |
|                                                                                                                                                                                                                                                             | C9                              | -2.730466075 | -4.687817814  | -1.550142098 |
|                                                                                                                                                                                                                                                             | C10                             | -3.663148963 | -5.293884359  | -0.490849143 |
|                                                                                                                                                                                                                                                             | C11                             | -5.392226865 | -6.899714388  | 0.047577074  |
|                                                                                                                                                                                                                                                             | C12                             | -4.721461406 | -7.730539077  | 1.148926898  |
|                                                                                                                                                                                                                                                             | C13                             | -3.172736393 | -9.552771555  | 1.658252500  |
|                                                                                                                                                                                                                                                             | C14                             | -1.955577728 | -9.039419206  | 2.436872317  |
|                                                                                                                                                                                                                                                             | C15                             | 0.077745854  | -7.665913541  | 2.331378935  |
|                                                                                                                                                                                                                                                             | C16                             | 0.172599536  | -6.228819578  | 2.838345487  |
|                                                                                                                                                                                                                                                             | C17                             | -0.824258958 | -3.944243233  | 2.817436204  |
|                                                                                                                                                                                                                                                             | C18                             | -1.806095492 | -3.739838007  | 3.988476655  |
|                                                                                                                                                                                                                                                             | C19                             | -1.123175215 | -3.029293893  | 1.611289333  |
|                                                                                                                                                                                                                                                             | C20                             | -1.335637967 | -1.579368465  | 2.055568817  |
|                                                                                                                                                                                                                                                             | C21                             | -0.018947544 | -3.131500226  | 0.553666218  |
|                                                                                                                                                                                                                                                             | C22                             | -4.168564194 | -3.710879254  | 4.703219060  |
|                                                                                                                                                                                                                                                             | C23                             | -4.304914625 | -4.948145779  | 5.605842592  |
|                                                                                                                                                                                                                                                             | C24                             | -5.513624208 | -3.297677144  | 4.051848823  |
|                                                                                                                                                                                                                                                             | C25                             | -6.642936759 | -3.246546920  | 5.088551500  |
|                                                                                                                                                                                                                                                             | C26                             | -5.379840325 | -1.945895532  | 3.341100984  |
|                                                                                                                                                                                                                                                             | C27                             | -4.538495184 | -7.356576683  | 5.776485083  |
|                                                                                                                                                                                                                                                             | C28                             | -3.569374425 | -7.463422151  | 6.935014869  |
|                                                                                                                                                                                                                                                             | C29                             | 9.869430001  | -9.262046793  | 2.123221651  |
|                                                                                                                                                                                                                                                             | C30                             | 9.624108617  | -7.843069144  | 2.644048792  |
|                                                                                                                                                                                                                                                             | C31                             | 7.989465764  | -6.459997734  | 3.937288573  |
|                                                                                                                                                                                                                                                             | C32                             | 8.192781092  | -6.598569426  | 5.459589195  |
|                                                                                                                                                                                                                                                             | C33                             | 6.512342798  | -6.202757943  | 3.582688284  |
|                                                                                                                                                                                                                                                             | C34                             | 5.956625327  | -4.900618105  | 4.170594865  |
|                                                                                                                                                                                                                                                             | C35                             | 4.545591326  | -4.598375967  | 3.651014973  |
|                                                                                                                                                                                                                                                             | C36                             | 2.972764002  | -2.862438726  | 4.594903194  |
|                                                                                                                                                                                                                                                             | C37                             | 9.181976675  | -5.590183760  | 7.460989413  |
|                                                                                                                                                                                                                                                             | C38                             | 8.388039126  | -4.568653779  | 8.245881142  |
|                                                                                                                                                                                                                                                             | C39                             | -1.029918379 | -1.844325665  | -5.906193539 |
|                                                                                                                                                                                                                                                             | C40                             | -2.408386210 | -1.367263970  | -5.410583279 |

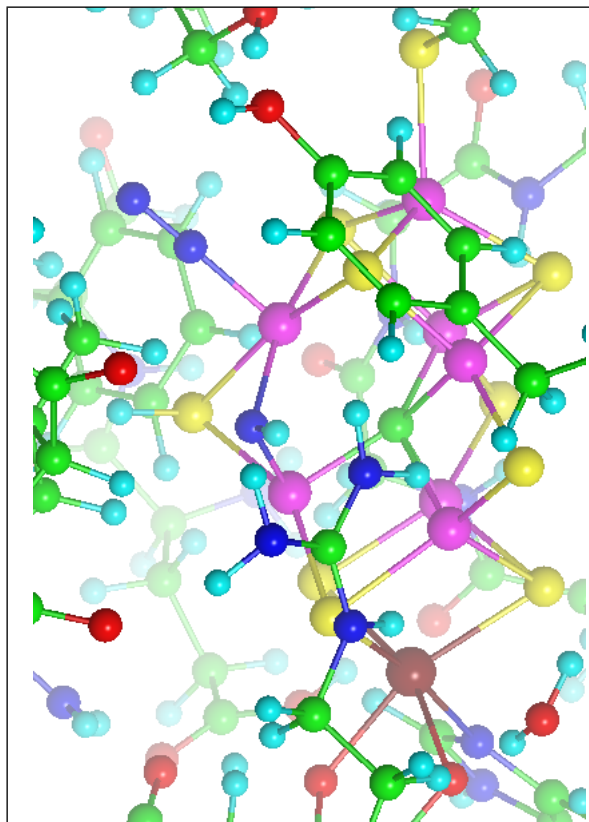

|      |               |              |              |
|------|---------------|--------------|--------------|
| C41  | 0.004891735   | -1.633159032 | -4.780436712 |
| C42  | 1.347718530   | -2.371251096 | -4.967452971 |
| C43  | 2.422811183   | -1.615669303 | -5.748215810 |
| C44  | -3.780952836  | 0.702537412  | -5.284247737 |
| C45  | -5.186262110  | 0.110725015  | -5.426999323 |
| C46  | -3.671581922  | 2.097674567  | -5.917357952 |
| C47  | -6.643506030  | -1.423832681 | -6.655864256 |
| C48  | -7.022019850  | -2.382662881 | -5.520612448 |
| C49  | -6.301376433  | -3.592303730 | -3.517392304 |
| C50  | -6.263690702  | -2.888175513 | -2.159505950 |
| C51  | -5.964325155  | -0.820028495 | -0.882951821 |
| C52  | -7.379345509  | -0.552544996 | -0.340546083 |
| C53  | -5.275341657  | 0.544644804  | -1.031647410 |
| C54  | -3.848381723  | 0.475494105  | -1.465586423 |
| C55  | -2.916632072  | -0.541270615 | -1.520451932 |
| C56  | -1.903515850  | 1.211746427  | -2.245174324 |
| C57  | -9.656203860  | 0.111706318  | -0.975364953 |
| C58  | -10.290076935 | -0.883397445 | -0.005228008 |
| C59  | -10.462088138 | 0.177014722  | -2.294482876 |
| C60  | -11.705202657 | 1.017503893  | -2.275437549 |
| C61  | -12.671842372 | 1.179523240  | -1.303158388 |
| C62  | -13.152653892 | 2.411196161  | -3.080861282 |
| C63  | 3.565994769   | 0.197959860  | 9.306881276  |
| C64  | 5.010077345   | -0.209581465 | 9.529663092  |
| C65  | 3.146415350   | -0.332056247 | 7.911553623  |
| C66  | 1.696356752   | -0.054381235 | 7.595399003  |
| C67  | 0.691098746   | -0.990412613 | 7.903953399  |
| C68  | 1.305398028   | 1.151759385  | 6.985512475  |
| C69  | -0.652030738  | -0.743750897 | 7.601917152  |
| C70  | -0.032585926  | 1.420282455  | 6.696490075  |
| C71  | -1.010028392  | 0.465663197  | 6.992543483  |
| C72  | -0.371358655  | 6.455196711  | 5.834589840  |
| C73  | -1.684192849  | 7.131648783  | 5.397869830  |
| C74  | -0.148323194  | 5.173948035  | 5.036865971  |
| C75  | -2.704995511  | 9.129952171  | 4.359570212  |
| C76  | -3.358324172  | 8.695649765  | 3.044278785  |
| C77  | -3.213607295  | 7.081523145  | 1.148875877  |
| C78  | -3.897392783  | 5.728489437  | 1.477211883  |
| C79  | -2.011113214  | 6.923062285  | 0.189428101  |
| C80  | -2.207026897  | 6.207525485  | -1.152374541 |
| C81  | -2.937219869  | 6.991311752  | -2.254687439 |
| C82  | -5.362702190  | 7.558735489  | -2.402569135 |
| C83  | -3.840577437  | 3.610826575  | 2.708452419  |
| C84  | -5.103336108  | 3.728386858  | 3.572538421  |
| C85  | -2.846414288  | 2.696623596  | 3.459129306  |
| C86  | -6.019663921  | 4.798710379  | 5.575243492  |
| C87  | -7.170791072  | 5.782044284  | 5.437870653  |
| C88  | -8.267724393  | 7.430696902  | 4.020699198  |
| C89  | -9.729364989  | 7.049419571  | 3.680197825  |
| C90  | -7.751985223  | 8.503809227  | 3.058324658  |
| C91  | -7.733373011  | 8.068210649  | 1.598996567  |
| C92  | -11.256637684 | 5.312303641  | 2.858071332  |
| C93  | -12.321047597 | 5.280735617  | 3.945758090  |
| C94  | -11.106393336 | 3.897451736  | 2.229953778  |
| C95  | -10.150188128 | 3.886312555  | 1.057502465  |
| C96  | -10.610498963 | 4.166321825  | -0.238645793 |
| C97  | -8.775275899  | 3.654312804  | 1.233062532  |
| C98  | -9.729837036  | 4.238288875  | -1.320587042 |
| C99  | -7.874703769  | 3.753428966  | 0.169192961  |
| C100 | -8.364249862  | 4.050769740  | -1.100762840 |
| C101 | 8.817490941   | 4.715462215  | -3.486506663 |
| C102 | 7.556679705   | 4.264256482  | -4.202503405 |
| C103 | 5.096063686   | 3.999469837  | -3.981047316 |
| C104 | 4.126589674   | 5.177836077  | -4.136155066 |
| C105 | 2.822500275   | 6.864307912  | -2.914471043 |
| C106 | 3.000669928   | 7.816060159  | -1.734736349 |
| C107 | 3.797771032   | 8.242447474  | 0.524513320  |
| C108 | 4.627230019   | 9.489936115  | 0.292053347  |
| C109 | 4.231342508   | 3.708344001  | -8.461087097 |
| C110 | 2.729637339   | 3.974898475  | -8.612030963 |
| C111 | 4.459946225   | 2.411795784  | -7.651390731 |
| C112 | 5.907375240   | 1.907259788  | -7.803825688 |
| C113 | 6.198502751   | 0.817695179  | -6.797757411 |
| C114 | 0.704400830   | 4.947030909  | -7.650767624 |
| C115 | 0.451854266   | 6.353159572  | -7.142474275 |
| C116 | -0.245332539  | 3.873969317  | -7.062542101 |
| C117 | 0.182491894   | 3.530813661  | -5.665951373 |
| C118 | -0.224883187  | 4.319668314  | -4.579251322 |
| C119 | 1.156286250   | 2.538905893  | -5.463090803 |
| C120 | 0.396379183   | 4.177139823  | -3.336616063 |
| C121 | 1.772867441   | 2.395398632  | -4.220561615 |
| C122 | 1.421644013   | 3.246362777  | -3.167471497 |

|       |              |               |              |
|-------|--------------|---------------|--------------|
| C123  | 11.115444490 | 0.929585724   | 0.693101083  |
| C124  | 11.546195181 | 0.397037088   | 2.068680864  |
| C125  | 10.288511470 | -0.114517640  | -0.073819004 |
| C126  | 9.620328088  | 0.365701393   | -1.322119446 |
| C127  | 10.212790382 | 0.793761404   | -2.491856120 |
| C128  | 8.022386168  | 0.660562079   | -2.789660422 |
| C129  | 12.440024844 | -1.398246719  | 3.425735010  |
| C130  | 13.411532922 | -0.503802098  | 4.161916663  |
| C131  | 4.993287768  | -4.249110418  | -2.345955232 |
| C132  | 5.880485366  | -4.277995165  | -1.104379030 |
| C133  | 7.101270538  | -3.308735387  | -1.155685711 |
| C134  | 8.213311288  | -3.888601146  | -2.066112613 |
| C135  | 9.528953953  | -3.106969475  | -2.039071440 |
| C136  | 10.668010048 | -3.758543913  | -2.852616108 |
| C137  | 7.662509546  | -3.148208955  | 0.265863425  |
| C138  | 3.656001411  | 1.710695660   | 1.115884437  |
| Fe139 | 5.225646621  | 2.049021654   | -0.102772323 |
| Fe140 | 1.291977178  | 1.626562839   | 1.072124555  |
| Fe141 | 3.436434405  | 2.173147429   | 3.040881908  |
| Fe142 | 3.485294956  | 3.646533941   | 0.894380782  |
| Fe143 | 1.550816785  | 3.955879635   | 2.697432498  |
| Fe144 | 5.040326875  | 0.521241691   | 1.926438942  |
| Fe145 | 3.149748314  | 0.083563282   | 0.267285052  |
| H146  | 0.651091373  | -6.566536115  | -7.517082702 |
| H147  | 0.354268516  | -5.043598680  | -8.019445735 |
| H148  | -3.729649462 | -6.187348780  | -8.224587823 |
| H149  | -1.637616178 | -5.713431983  | -9.169193810 |
| H150  | -1.293378845 | -7.384569371  | -8.730844597 |
| H151  | -4.012139233 | -4.978861113  | -5.706483072 |
| H152  | -3.549670137 | -8.416137252  | -6.314195147 |
| H153  | -5.286754395 | -5.855363875  | -6.580172711 |
| H154  | -3.423769084 | -10.181736573 | -4.812177196 |
| H155  | -1.597101122 | -7.745865722  | -4.625353928 |
| H156  | -4.654929945 | -9.390723354  | -3.799351959 |
| H157  | -2.001151876 | -4.065237058  | -1.020136020 |
| H158  | -2.235346976 | -5.729017998  | -3.359569507 |
| H159  | 0.228536792  | -7.231618455  | -3.278374615 |
| H160  | -5.968536956 | -6.108262480  | 0.543677144  |
| H161  | -4.479459666 | -6.583842311  | -1.882708473 |
| H162  | -0.261896586 | -8.465575277  | -2.092028484 |
| H163  | -3.306609772 | -4.041753957  | -2.225651461 |
| H164  | -3.580795879 | -8.719293475  | -0.271538069 |
| H165  | -6.087021436 | -7.541953184  | -0.510357021 |
| H166  | 0.137250177  | -4.169803064  | 0.226306554  |
| H167  | -0.287722411 | -2.525055791  | -0.325466186 |
| H168  | 0.931958569  | -2.725920569  | 0.931514161  |
| H169  | -2.065054795 | -3.384575902  | 1.162648992  |
| H170  | -2.848573017 | -10.440912875 | 1.096287276  |
| H171  | -4.580167093 | -1.948265731  | 2.587092437  |
| H172  | -4.344374443 | -6.246161665  | 3.972840848  |
| H173  | -6.825630389 | -4.224775208  | 5.556481105  |
| H174  | -1.623033646 | -0.971921858  | 1.188113311  |
| H175  | -0.414885111 | -1.141374548  | 2.467150694  |
| H176  | 2.951636829  | -0.323284770  | 10.065979914 |
| H177  | -6.316837785 | -1.682149287  | 2.830184968  |
| H178  | -7.576994046 | -2.921115446  | 4.606747453  |
| H179  | -5.157232930 | -1.147993134  | 4.068618119  |
| H180  | -6.406218228 | -2.528766037  | 5.890242760  |
| H181  | -5.773098288 | -4.067116952  | 3.301625964  |
| H182  | -3.838665251 | -2.906134244  | 5.376415524  |
| H183  | -3.403489353 | -4.126287922  | 2.736574071  |
| H184  | -2.133200070 | -1.481775198  | 2.806824808  |
| H185  | -1.851578594 | 2.802813181   | 3.001252824  |
| H186  | -3.191285603 | 1.661622990   | 3.317546583  |
| H187  | -2.669522662 | 2.190932568   | 5.353434952  |
| H188  | -2.893034584 | 0.012205677   | 6.864942764  |
| H189  | -0.319970649 | 2.348715161   | 6.202272063  |
| H190  | 2.064859569  | 1.880404481   | 6.694632153  |
| H191  | 0.963907742  | -1.938408882  | 8.375735455  |
| H192  | -1.499808663 | -5.699193768  | 1.797197727  |
| H193  | 0.854958797  | -7.777989383  | 1.560051307  |
| H194  | 0.343717930  | -8.313197265  | 3.176612132  |
| H195  | -1.413060658 | -7.836622071  | 0.839132821  |
| H196  | -3.913014295 | -9.870790942  | 2.403757441  |
| H197  | -1.412719996 | -1.498473805  | 7.816142993  |
| H198  | 0.164853457  | -3.698670594  | 3.220696078  |
| H199  | -5.567430480 | -7.431754697  | 6.164129621  |
| H200  | -4.361918021 | -8.222163132  | 5.119331659  |
| H201  | -2.582645088 | -6.970720761  | 6.774918142  |
| H202  | 10.255836406 | -5.432417305  | 7.641965596  |
| H203  | 4.447537557  | -1.361992928  | -5.871416751 |
| H204  | 5.635428423  | -2.414357100  | -2.402616624 |

|      |               |              |              |
|------|---------------|--------------|--------------|
| H205 | 6.042824832   | 1.490930354  | -8.812079949 |
| H206 | 6.614687630   | 2.739360999  | -7.673238417 |
| H207 | 3.769953437   | 1.623816795  | -7.990603578 |
| H208 | 1.343069577   | 7.023457568  | -7.166929064 |
| H209 | 4.561848220   | 3.512470895  | -9.492858541 |
| H210 | 0.182770221   | -0.552827416 | -4.666034569 |
| H211 | 1.185121120   | -3.329660854 | -5.491843688 |
| H212 | 2.654867178   | 4.904885309  | -6.756374321 |
| H213 | 0.475485518   | 5.012577968  | -8.734722678 |
| H214 | 4.791011844   | 5.077934081  | -7.001968788 |
| H215 | 3.943837452   | -2.367394623 | -4.521198338 |
| H216 | 4.218366099   | 2.601505500  | -6.593720429 |
| H217 | 5.952343987   | 4.776639275  | -8.129770230 |
| H218 | -0.937279593  | -1.617315047 | -7.960017582 |
| H219 | -0.448191410  | -1.966166923 | -3.836797474 |
| H220 | 7.029666510   | 2.184416320  | -5.656654167 |
| H221 | 1.750595120   | -2.640256814 | -3.979943772 |
| H222 | -5.456444384  | -1.434468069 | -0.126550892 |
| H223 | -3.056230701  | -1.583477167 | -1.245629897 |
| H224 | -7.313883620  | -4.003738557 | -3.632072485 |
| H225 | -5.062609471  | -2.429678362 | -4.815792143 |
| H226 | -8.058599471  | -0.477209196 | -2.276104519 |
| H227 | -12.777525605 | 0.770773068  | -0.304306862 |
| H228 | -9.965504968  | -1.939504899 | -0.168081332 |
| H229 | -10.681624970 | -0.850275971 | -2.634995033 |
| H230 | -9.632438945  | 1.103279857  | -0.495540557 |
| H231 | -13.692367028 | 3.108468321  | -3.716630266 |
| H232 | -5.355055913  | 1.053416580  | -0.056077467 |
| H233 | -5.847943513  | 1.152661081  | -1.751810076 |
| H234 | -14.419407832 | 2.413121081  | -1.369777669 |
| H235 | -9.802969921  | 0.621158778  | -3.057284323 |
| H236 | -5.811476277  | -1.049388317 | -3.016665177 |
| H237 | -5.614177713  | -4.450921215 | -3.472984944 |
| H238 | -7.479764021  | -0.716708948 | -6.750597027 |
| H239 | -1.155123279  | 1.906384806  | -2.618866971 |
| H240 | -6.588635897  | -1.998886924 | -7.589536277 |
| H241 | 3.549704705   | 1.970631575  | 10.334387695 |
| H242 | 2.552674141   | 1.956622460  | 9.041054561  |
| H243 | -2.284495244  | 5.100939891  | 2.650259007  |
| H244 | -4.142262540  | 3.101150474  | 1.782071962  |
| H245 | -4.224400948  | 5.283899352  | 4.575480034  |
| H246 | -3.616555752  | 2.513853010  | -2.070457302 |
| H247 | -4.827770618  | 3.545494322  | -3.694791892 |
| H248 | -4.697235479  | 3.765663400  | -5.914171229 |
| H249 | -5.827954437  | 3.742804052  | -2.481015115 |
| H250 | -2.653222293  | 2.478097407  | -5.732243022 |
| H251 | -3.833619631  | 2.025103968  | -7.004628547 |
| H252 | -6.766638487  | 8.857436614  | 3.391940500  |
| H253 | -8.448241565  | 9.354890542  | 3.125384168  |
| H254 | -5.787318629  | 8.743110572  | 1.407142077  |
| H255 | -6.532706343  | 8.016800727  | -0.015805614 |
| H256 | -5.887259001  | 9.546197258  | -2.420154087 |
| H257 | -2.490917931  | 6.764606592  | -3.235216904 |
| H258 | -10.107028964 | 4.439320043  | -2.326834734 |
| H259 | -8.376543788  | 3.378746726  | 2.212882840  |
| H260 | -6.832526463  | 6.144359807  | -2.114327083 |
| H261 | -1.224384951  | 6.376885702  | 0.734508774  |
| H262 | -1.837314399  | 7.373935731  | 2.749576128  |
| H263 | -2.678402809  | 5.221757785  | -1.014997474 |
| H264 | -4.594010567  | -0.933562689 | -7.077918361 |
| H265 | -2.400497130  | 10.179783000 | 4.251640296  |
| H266 | -2.005096872  | 0.249696651  | -6.493321117 |
| H267 | -1.608565337  | 7.933080454  | 0.004476906  |
| H268 | -6.805300416  | 3.632219962  | 0.341684540  |
| H269 | -3.492545931  | 9.084924841  | 5.125432774  |
| H270 | -4.216887099  | 9.234972439  | -2.773267489 |
| H271 | -7.388898131  | 7.697659500  | -2.644203477 |
| H272 | 0.379716219   | -0.989243520 | -7.139615341 |
| H273 | -1.135542801  | -2.933262985 | -6.069916959 |
| H274 | -11.676343863 | 4.326670443  | -0.414969968 |
| H275 | -3.622219714  | 0.790393903  | -4.199863334 |
| H276 | -3.988610705  | 7.717394700  | 0.709061478  |
| H277 | -2.803014643  | 8.067007622  | -2.083322468 |
| H278 | -1.195313504  | 6.007072711  | -1.529149664 |
| H279 | -4.606005355  | 5.668975763  | -2.431545585 |
| H280 | -6.452099461  | 3.796975832  | 5.719514409  |
| H281 | -6.639257653  | 6.120422316  | 3.490946143  |
| H282 | -8.358502115  | 7.902671270  | 5.011999302  |
| H283 | -5.474100656  | 5.068782033  | 6.489453313  |
| H284 | -9.162910192  | 5.145779543  | 3.268172088  |
| H285 | 8.587427054   | 5.547412424  | -2.804144295 |
| H286 | 9.121670982   | 3.857290143  | -2.852061488 |



|       |               |               |              |
|-------|---------------|---------------|--------------|
| H287  | 10.482442176  | 1.802845317   | 0.909404406  |
| H288  | 10.738056006  | 5.186002511   | -3.978736508 |
| H289  | 9.924357718   | 4.400217322   | -5.162657882 |
| H290  | 0.782198492   | 4.712550267   | 5.393645858  |
| H291  | -1.239274952  | 5.586530892   | 7.466119159  |
| H292  | -0.626753067  | 8.735380846   | 4.658858554  |
| H293  | -0.985409132  | 4.479670413   | 5.197685771  |
| H294  | -0.461979474  | 6.982601263   | 7.819128494  |
| H295  | 4.290771929   | 7.658738122   | 1.317794403  |
| H296  | 0.472031475   | 7.140025734   | 5.654963308  |
| H297  | 5.911480768   | -7.064315664  | 3.919890854  |
| H298  | 8.601584278   | -5.635256473  | 3.551176883  |
| H299  | 4.109714182   | 6.456831078   | -0.595277380 |
| H300  | 1.930062923   | -1.245448586  | 5.291866851  |
| H301  | 2.961961926   | 7.446866399   | -3.833567120 |
| H302  | 2.527973610   | 1.621430891   | -4.066652765 |
| H303  | 1.766539633   | 6.541588527   | -2.903686045 |
| H304  | 3.826668789   | -5.325963257  | 4.043801990  |
| H305  | 3.936101637   | 5.182324348   | -2.112732341 |
| H306  | 4.512463491   | -4.676869919  | 2.551593258  |
| H307  | 6.452476895   | -6.162702408  | 2.483598930  |
| H308  | 6.619328580   | -4.062160446  | 3.906574163  |
| H309  | 5.924450834   | -4.951677849  | 5.271164481  |
| H310  | -0.209173090  | 2.993775613   | -7.720799410 |
| H311  | 7.929633125   | -8.555284949  | 3.430042885  |
| H312  | 9.723123411   | -9.212910116  | 1.033087626  |
| H313  | 1.922040643   | 3.172453994   | -2.204703395 |
| H314  | 9.358642848   | -10.683542539 | 3.523205185  |
| H315  | 8.801858256   | -11.018008091 | 2.018705801  |
| H316  | 4.706651736   | -2.489770638  | 3.644390842  |
| H317  | 0.092030596   | 4.791827719   | -2.488199772 |
| H318  | 1.447053611   | 1.887068623   | -6.290733285 |
| H319  | 12.095610805  | -3.823845596  | 0.820654484  |
| H320  | 10.943585420  | -0.959459312  | -0.348331414 |
| H321  | 9.674411137   | -4.039515449  | 1.641198048  |
| H322  | 12.404392633  | -3.577383301  | -0.685777997 |
| H323  | 5.312352780   | 9.445694832   | -0.588630499 |
| H324  | 7.592210287   | -1.874279465  | 2.585374813  |
| H325  | 6.205671029   | -5.308413188  | -0.916478027 |
| H326  | 6.452863719   | 4.777697834   | -2.556325253 |
| H327  | 8.396616000   | -4.922637241  | -1.734008057 |
| H328  | 9.293371835   | 1.221310202   | -4.378726470 |
| H329  | 7.057716566   | 0.684976632   | -3.282595884 |
| H330  | 10.938466885  | -9.478049919  | 2.288699197  |
| H331  | 3.454399325   | -0.834362631  | 4.550171438  |
| H332  | 8.950006453   | -2.715645179  | 4.328128800  |
| H333  | 7.298564470   | -0.890114280  | 3.751795364  |
| H334  | 9.189149190   | -4.764271035  | 5.474591477  |
| H335  | 1.916590398   | -4.635785499  | 4.539025617  |
| H336  | 9.360237021   | -2.101280576  | -2.454633329 |
| H337  | 9.873367089   | -2.975322819  | -1.003938691 |
| H338  | 7.829355891   | -3.940494469  | -3.096719719 |
| H339  | 4.699239500   | 3.257252265   | -3.270492836 |
| H340  | -1.000292053  | 5.075156310   | -4.727440103 |
| H341  | -1.263502424  | 4.290506306   | -7.092698285 |
| H342  | 5.228640992   | -3.977947895  | -0.266097449 |
| H343  | 10.097090448  | -3.577336239  | 3.723069126  |
| H344  | 10.570321094  | -5.147232829  | 2.235436859  |
| H345  | 1.181688706   | -3.370928788  | 5.386305814  |
| H346  | 11.254099623  | 0.952105901   | -2.747075202 |
| H347  | 9.522745097   | -0.528143933  | 0.594620981  |
| H348  | 5.222311662   | 3.531897347   | -4.959780384 |
| H349  | 2.805427841   | 8.538748384   | 0.897149244  |
| H350  | 3.333781000   | -1.416253884  | 7.894303199  |
| H351  | 3.796514662   | 0.133902698   | 7.153083179  |
| H352  | 12.759694749  | 2.127040250   | 0.423040942  |
| H353  | 12.931191081  | 0.639557278   | -0.238114751 |
| H354  | 12.945585876  | -2.360703905  | 3.254556691  |
| H355  | 12.147109279  | -1.471740787  | 1.315167427  |
| H356  | 14.031649396  | 0.157787473   | 3.508732054  |
| H357  | 11.563508953  | -1.594751067  | 4.063131138  |
| H358  | 5.756298001   | 0.450461050   | 9.024767131  |
| H359  | -11.928472280 | 5.168841530   | 4.983948445  |
| H360  | 8.911711405   | -6.584128858  | 7.858204004  |
| H361  | 7.425044917   | -4.255060393  | 7.774663713  |
| H362  | -11.591724028 | 6.018261635   | 2.080721647  |
| H363  | -10.769360250 | 3.195005179   | 3.008522226  |
| H364  | -12.107428823 | 3.574961385   | 1.909090887  |
| H365  | -7.934265832  | 4.169646706   | -2.994901056 |
| H366  | 1.901661641   | -0.595322954  | 2.305907137  |
| H367  | 0.624563346   | -0.132229400  | -1.030152310 |
| Mo368 | 6.430316301   | -0.423385132  | -0.231990393 |

|      |               |               |              |
|------|---------------|---------------|--------------|
| N369 | 1.788506211   | -0.210563135  | 1.355869530  |
| N370 | 0.234148531   | -6.025840819  | -8.279320778 |
| N371 | -3.360774602  | -6.229605354  | -7.277729008 |
| N372 | -3.854672085  | -8.223246675  | -5.363105044 |
| N373 | -1.597741216  | -8.149609395  | -3.685821782 |
| N374 | -2.046625484  | -5.683782371  | -2.361603720 |
| N375 | -4.450333439  | -6.317875148  | -0.895711757 |
| N376 | -3.784206070  | -8.621380349  | 0.726429429  |
| N377 | -1.199190763  | -8.100426854  | 1.803925092  |
| N378 | -0.783547126  | -5.359866033  | 2.439506035  |
| N379 | -3.127573427  | -3.896771674  | 3.693103772  |
| N380 | -4.327527749  | -6.157151432  | 4.988923431  |
| N381 | 8.952274537   | -10.260358730 | 2.686333055  |
| N382 | 8.453864293   | -7.684486874  | 3.295359711  |
| N383 | 4.120974724   | -3.241671590  | 4.016626751  |
| N384 | 2.068549520   | -3.756782912  | 5.058505217  |
| N385 | 2.723269026   | -1.547149880  | 4.732155864  |
| N386 | 8.877250389   | -5.583084483  | 6.043615050  |
| N387 | -0.650050327  | -1.108835458  | -7.120729333 |
| N388 | 3.693616199   | -1.823203373  | -5.354367061 |
| N389 | -2.733875112  | -0.126140603  | -5.864707368 |
| N390 | -5.390414742  | -0.710206194  | -6.485207379 |
| N391 | -6.023836759  | -2.772859256  | -4.681609140 |
| N392 | -5.990541798  | -1.552835608  | -2.144951350 |
| N393 | -3.182720807  | 1.591362496   | -1.936775423 |
| N394 | -1.711789434  | -0.078227196  | -2.003689468 |
| N395 | -8.314139658  | -0.337726465  | -1.301485507 |
| N396 | -12.018137919 | 1.791810838   | -3.382874091 |
| N397 | -13.581289225 | 2.072071670   | -1.832624865 |
| N398 | 3.478680287   | 1.660324390   | 9.362000026  |
| N399 | -0.388390087  | 6.122898593   | 7.268028048  |
| N400 | -1.558318080  | 8.348697346   | 4.787986419  |
| N401 | -2.711380405  | 7.735953781   | 2.353790220  |
| N402 | -4.367693598  | 6.677834020   | -2.322917794 |
| N403 | -5.144535822  | 8.874254875   | -2.583237193 |
| N404 | -6.640231336  | 7.142090746   | -2.238409616 |
| N405 | -3.260167667  | 4.911191963   | 2.362670240  |
| N406 | -5.099867766  | 4.768636444   | 4.454698054  |
| N407 | -7.355073051  | 6.315853217   | 4.190982397  |
| N408 | -6.632573658  | 8.456651040   | 0.897519594  |
| N409 | -9.974432922  | 5.744527725   | 3.400053213  |
| N410 | 9.834443086   | 5.135415518   | -4.454923817 |
| N411 | 6.405455924   | 4.448146959   | -3.523989256 |
| N412 | 3.707127098   | 5.714144241   | -2.970593860 |
| N413 | 3.704576513   | 7.396706337   | -0.652897053 |
| N414 | 4.946481587   | 4.906376227   | -8.002481884 |
| N415 | 2.117945173   | 4.630075945   | -7.584754527 |
| N416 | 12.261638631  | 1.404012358   | -0.104365528 |
| N417 | 8.243472370   | 0.301059148   | -1.526510312 |
| N418 | 9.190323432   | 0.973817322   | -3.398227525 |
| N419 | 12.071728954  | -0.856065513  | 2.129849275  |
| N420 | -1.618463599  | 1.605905581   | 0.815432322  |
| N421 | -0.501067167  | 1.605852658   | 0.949572059  |
| O422 | -1.495272383  | -6.134315129  | -5.972504322 |
| O423 | -4.662936181  | -6.655648704  | -3.917766918 |
| O424 | -2.776719471  | -9.306181465  | -2.103996319 |
| O425 | -0.918443583  | -6.543821091  | -0.588002779 |
| O426 | -3.688387427  | -4.862701233  | 0.674518716  |
| O427 | -5.049747111  | -7.614717023  | 2.341017361  |
| O428 | -1.683884568  | -9.517557677  | 3.546603876  |
| O429 | 1.143690559   | -5.934468460  | 3.562424408  |
| O430 | -1.397309622  | -3.441183914  | 5.122396063  |
| O431 | -4.398030463  | -4.846255949  | 6.839973573  |
| O432 | -3.808255174  | -8.105729940  | 7.947068465  |
| O433 | 10.465942841  | -6.948459391  | 2.423605452  |
| O434 | 7.756666553   | -7.589890259  | 6.072106645  |
| O435 | 8.746429909   | -4.116474395  | 9.322070634  |
| O436 | -3.142245057  | -2.049487785  | -4.671415052 |
| O437 | -2.143459243  | -0.870840506  | -6.717020805 |
| O438 | -6.071043811  | 0.366267258   | -4.591901935 |
| O439 | -4.653433361  | 2.980332477   | -5.340222296 |
| O440 | -8.196851730  | -2.767634425  | -5.425591342 |
| O441 | -6.485151228  | -3.538503626  | -1.129618696 |
| O442 | -7.623694819  | -0.455059800  | 0.867679687  |
| O443 | -11.122581931 | -0.594979723  | 0.838889597  |
| O444 | 5.360529446   | -1.180054405  | 10.184481015 |
| O445 | -2.313707804  | 0.764275257   | 6.643216378  |
| O446 | -2.794361810  | 6.611274889   | 5.598254986  |
| O447 | -4.418923968  | 9.240273660   | 2.678347161  |
| O448 | -4.983706357  | 5.437491546   | 0.953116920  |
| O449 | -6.011841999  | 2.892023584   | 3.497890575  |
| O450 | -2.786219244  | 3.022720397   | 4.851363370  |

|                                                                                                                                                                                                                                                              |                                      |               |               |              |
|--------------------------------------------------------------------------------------------------------------------------------------------------------------------------------------------------------------------------------------------------------------|--------------------------------------|---------------|---------------|--------------|
|                                                                                                                                                                                                                                                              | O451                                 | -7.892611590  | 6.056354610   | 6.404356959  |
|                                                                                                                                                                                                                                                              | O452                                 | -10.622284851 | 7.907276490   | 3.727066721  |
|                                                                                                                                                                                                                                                              | O453                                 | -8.679353749  | 7.455620747   | 1.085598832  |
|                                                                                                                                                                                                                                                              | O454                                 | -13.518283941 | 5.337455841   | 3.712933697  |
|                                                                                                                                                                                                                                                              | O455                                 | -7.440707363  | 4.195897374   | -2.152305699 |
|                                                                                                                                                                                                                                                              | O456                                 | 7.618069226   | 3.720604185   | -5.332144317 |
|                                                                                                                                                                                                                                                              | O457                                 | 3.791573987   | 5.613217152   | -5.257543547 |
|                                                                                                                                                                                                                                                              | O458                                 | 2.463062005   | 8.935662172   | -1.774581602 |
|                                                                                                                                                                                                                                                              | O459                                 | 4.589117371   | 10.463504680  | 1.026670780  |
|                                                                                                                                                                                                                                                              | O460                                 | 2.104625632   | 3.588963528   | -9.614109361 |
|                                                                                                                                                                                                                                                              | O461                                 | 5.874733265   | -0.354928634  | -6.952085375 |
|                                                                                                                                                                                                                                                              | O462                                 | 6.806637359   | 1.204232530   | -5.656337598 |
|                                                                                                                                                                                                                                                              | O463                                 | -0.640084599  | 6.769537043   | -6.782015396 |
|                                                                                                                                                                                                                                                              | O464                                 | 11.461482215  | 1.102561874   | 3.093042371  |
|                                                                                                                                                                                                                                                              | O465                                 | 13.583684773  | -0.542076857  | 5.372802576  |
|                                                                                                                                                                                                                                                              | O466                                 | 4.893231849   | -3.058668274  | -2.934359134 |
|                                                                                                                                                                                                                                                              | O467                                 | 4.367845829   | -5.236609924  | -2.736945707 |
|                                                                                                                                                                                                                                                              | O468                                 | 11.828666565  | -3.798231423  | -2.309657729 |
|                                                                                                                                                                                                                                                              | O469                                 | 10.388043149  | -4.180041485  | -4.010209062 |
|                                                                                                                                                                                                                                                              | O470                                 | 7.633601169   | -1.942183850  | 0.768194300  |
|                                                                                                                                                                                                                                                              | O471                                 | 8.128703268   | -4.131991430  | 0.872763681  |
|                                                                                                                                                                                                                                                              | O472                                 | 6.651341854   | -2.041966889  | -1.633548792 |
|                                                                                                                                                                                                                                                              | O473                                 | 9.708281017   | -3.293843911  | 4.596199837  |
|                                                                                                                                                                                                                                                              | O474                                 | 7.495586549   | -1.827794561  | 3.571403325  |
|                                                                                                                                                                                                                                                              | O475                                 | -4.901801267  | 3.897821565   | -2.770372584 |
|                                                                                                                                                                                                                                                              | O476                                 | 12.815851844  | -3.509237450  | 0.229409086  |
|                                                                                                                                                                                                                                                              | O477                                 | 10.546657054  | -4.165760299  | 2.104939742  |
|                                                                                                                                                                                                                                                              | S478                                 | -0.010158196  | 5.502777482   | 3.221913011  |
|                                                                                                                                                                                                                                                              | S479                                 | 1.298821304   | 3.919943751   | 0.454000486  |
|                                                                                                                                                                                                                                                              | S480                                 | 4.819386149   | 0.517255774   | -1.674774894 |
|                                                                                                                                                                                                                                                              | S481                                 | 1.238760158   | 1.862866253   | 3.385259754  |
|                                                                                                                                                                                                                                                              | S482                                 | 1.583944681   | 0.820746162   | -1.147955096 |
|                                                                                                                                                                                                                                                              | S483                                 | 5.154084801   | 4.251014649   | -0.424808831 |
|                                                                                                                                                                                                                                                              | S484                                 | 4.583047792   | -1.469672949  | 0.993439156  |
|                                                                                                                                                                                                                                                              | S485                                 | 3.740940176   | 4.394175678   | 3.006141274  |
|                                                                                                                                                                                                                                                              | S486                                 | 6.954540472   | 1.385409573   | 1.205657685  |
|                                                                                                                                                                                                                                                              | S487                                 | 4.843566802   | 0.853958354   | 4.100553642  |
|                                                                                                                                                                                                                                                              | end                                  |               |               |              |
| <b>Fe2-brNH-Fe6-S2BH</b><br><b>2N2 dissociated</b><br><b>35, S=1/2</b><br><br><b>Fe( 139) -2.334</b><br><b>Fe( 140) 1.418</b><br><b>Fe( 141) -2.530</b><br><b>Fe( 142) 1.893</b><br><b>Fe( 143) 3.069</b><br><b>Fe( 144) 2.407</b><br><b>Fe( 145) -1.455</b> | <b>bm602b26nh2n2x3dtb 5 53153.47</b> |               |               |              |
|                                                                                                                                                                                                                                                              | C1                                   | -7.987398200  | -5.241398252  | -1.147514201 |
|                                                                                                                                                                                                                                                              | C2                                   | -8.209510360  | -6.238644878  | -2.290218865 |
|                                                                                                                                                                                                                                                              | C3                                   | -8.965224887  | -3.383678017  | 0.132128800  |
|                                                                                                                                                                                                                                                              | C4                                   | -8.685643531  | -3.814512499  | 1.569038936  |
|                                                                                                                                                                                                                                                              | C5                                   | -8.718225203  | -5.604923609  | 3.231907265  |
|                                                                                                                                                                                                                                                              | C6                                   | -7.212646107  | -5.717643875  | 3.493224764  |
|                                                                                                                                                                                                                                                              | C7                                   | -4.979837866  | -5.943316504  | 2.533286211  |
|                                                                                                                                                                                                                                                              | C8                                   | -4.419810458  | -4.545153860  | 2.808756765  |
|                                                                                                                                                                                                                                                              | C9                                   | -4.620957615  | -2.141842039  | 2.410286024  |
|                                                                                                                                                                                                                                                              | C10                                  | -4.883885486  | -1.693903373  | 3.855051946  |
|                                                                                                                                                                                                                                                              | C11                                  | -6.408337941  | -1.622467322  | 5.736407472  |
|                                                                                                                                                                                                                                                              | C12                                  | -5.603640703  | -2.336439962  | 6.830778357  |
|                                                                                                                                                                                                                                                              | C13                                  | -4.890506131  | -4.483693273  | 7.756904061  |
|                                                                                                                                                                                                                                                              | C14                                  | -3.370353240  | -4.649455875  | 7.648215361  |
|                                                                                                                                                                                                                                                              | C15                                  | -1.469119921  | -4.968241905  | 6.128400813  |
|                                                                                                                                                                                                                                                              | C16                                  | -0.550202150  | -3.849581875  | 5.644365247  |
|                                                                                                                                                                                                                                                              | C17                                  | -0.392781524  | -1.573745924  | 4.642011754  |
|                                                                                                                                                                                                                                                              | C18                                  | -0.307196856  | -0.472615289  | 5.718075093  |
|                                                                                                                                                                                                                                                              | C19                                  | -0.965232798  | -1.069763074  | 3.301073813  |
|                                                                                                                                                                                                                                                              | C20                                  | -0.275006522  | 0.223604993   | 2.857158053  |
|                                                                                                                                                                                                                                                              | C21                                  | -0.850360687  | -2.146225682  | 2.216962658  |
|                                                                                                                                                                                                                                                              | C22                                  | -1.548685640  | 1.232811893   | 7.007364313  |
|                                                                                                                                                                                                                                                              | C23                                  | -1.583395809  | 0.670600508   | 8.436719111  |
|                                                                                                                                                                                                                                                              | C24                                  | -2.738086150  | 2.183110859   | 6.716617293  |
|                                                                                                                                                                                                                                                              | C25                                  | -2.907774655  | 3.225703734   | 7.827894404  |
|                                                                                                                                                                                                                                                              | C26                                  | -2.559735721  | 2.877848875   | 5.360587059  |
|                                                                                                                                                                                                                                                              | C27                                  | -2.565750865  | -0.884022132  | 10.015311214 |
|                                                                                                                                                                                                                                                              | C28                                  | -1.231168730  | -1.246805665  | 10.633631976 |
|                                                                                                                                                                                                                                                              | C29                                  | 4.737934729   | -12.301895097 | 3.695567722  |
|                                                                                                                                                                                                                                                              | C30                                  | 5.413868208   | -10.970944240 | 3.356698254  |
|                                                                                                                                                                                                                                                              | C31                                  | 5.545076419   | -8.575867303  | 4.065776240  |
|                                                                                                                                                                                                                                                              | C32                                  | 6.546381710   | -8.375894467  | 5.222464699  |
|                                                                                                                                                                                                                                                              | C33                                  | 4.386121272   | -7.566794528  | 4.148709171  |
|                                                                                                                                                                                                                                                              | C34                                  | 4.842868775   | -6.109476863  | 4.036872738  |
|                                                                                                                                                                                                                                                              | C35                                  | 3.657693023   | -5.139983520  | 3.967857039  |
|                                                                                                                                                                                                                                                              | C36                                  | 3.764812892   | -2.622769996  | 4.164643367  |
|                                                                                                                                                                                                                                                              | C37                                  | 8.818664209   | -7.703184117  | 5.833502128  |
|                                                                                                                                                                                                                                                              | C38                                  | 9.115423050   | -6.247397189  | 6.119664244  |
|                                                                                                                                                                                                                                                              | C39                                  | -4.923833675  | -2.357022957  | -3.060862838 |
|                                                                                                                                                                                                                                                              | C40                                  | -5.439682443  | -1.012197638  | -2.513910315 |
|                                                                                                                                                                                                                                                              | C41                                  | -3.442361057  | -2.535315855  | -2.666965116 |
|                                                                                                                                                                                                                                                              | C42                                  | -2.885909850  | -3.966027093  | -2.825069602 |

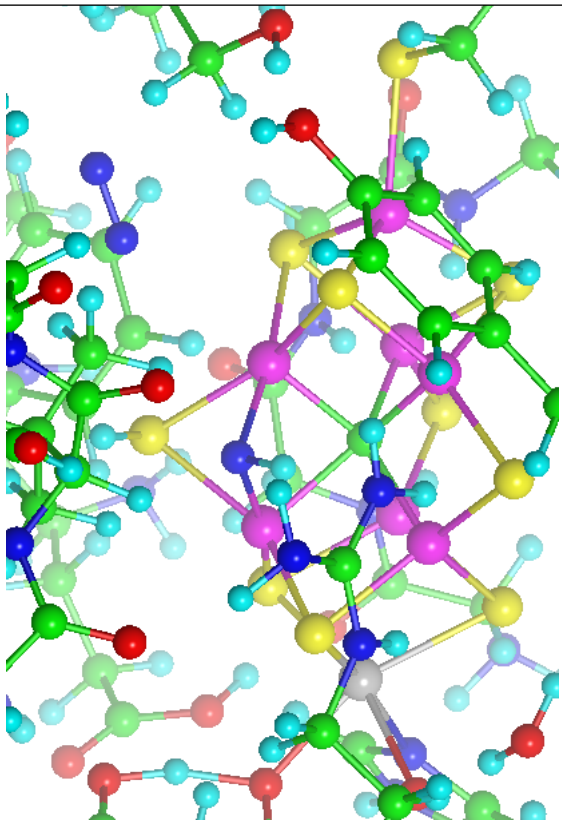

|      |               |              |              |
|------|---------------|--------------|--------------|
| C43  | -2.305309102  | -4.313978515 | -4.195681982 |
| C44  | -5.567816457  | 1.384026663  | -3.162574222 |
| C45  | -6.869131398  | 1.800590990  | -2.471202371 |
| C46  | -5.333101420  | 2.150144809  | -4.473199066 |
| C47  | -9.216066908  | 1.252898616  | -2.039413288 |
| C48  | -9.169104330  | 1.105729728  | -0.513456844 |
| C49  | -7.922774712  | 0.336426100  | 1.448383181  |
| C50  | -6.825306467  | 1.212352682  | 2.056026115  |
| C51  | -5.065695180  | 2.885169256  | 1.722671975  |
| C52  | -5.630998464  | 4.121061476  | 2.443351109  |
| C53  | -4.157608769  | 3.394694845  | 0.591257055  |
| C54  | -3.453602113  | 2.314623675  | -0.161816238 |
| C55  | -3.196775820  | 0.984234566  | 0.095926987  |
| C56  | -2.297340016  | 1.382788355  | -1.816168242 |
| C57  | -7.354474972  | 5.865657315  | 2.333031867  |
| C58  | -7.609141150  | 5.808496739  | 3.837842513  |
| C59  | -8.688818483  | 6.049804438  | 1.570157314  |
| C60  | -9.242066230  | 7.442482844  | 1.506561469  |
| C61  | -9.313984272  | 8.434996589  | 2.465598955  |
| C62  | -10.228826190 | 9.126242776  | 0.569453010  |
| C63  | 8.140595718   | 0.543504979  | 5.730834999  |
| C64  | 9.144024120   | -0.590714440 | 5.652078140  |
| C65  | 6.818509083   | 0.030634233  | 5.108708642  |
| C66  | 5.702468205   | 1.046794903  | 5.184691749  |
| C67  | 4.828361293   | 1.085010268  | 6.286420100  |
| C68  | 5.507678888   | 1.987943699  | 4.158027042  |
| C69  | 3.787671018   | 2.016607903  | 6.358274002  |
| C70  | 4.483416871   | 2.934670480  | 4.224084067  |
| C71  | 3.619868362   | 2.943018831  | 5.323049981  |
| C72  | 5.665208232   | 6.578507638  | 0.806815200  |
| C73  | 4.738896176   | 7.777058154  | 0.526620473  |
| C74  | 4.846907150   | 5.295189806  | 0.872229401  |
| C75  | 4.146722799   | 9.574091396  | -1.063549648 |
| C76  | 2.742163810   | 9.289103435  | -1.606558264 |
| C77  | 1.106197356   | 7.487360759  | -2.139978123 |
| C78  | 0.306526113   | 7.038042827  | -0.888834139 |
| C79  | 1.322570645   | 6.345608895  | -3.159490960 |
| C80  | 0.109643455   | 5.569421747  | -3.685351593 |
| C81  | -0.758958841  | 6.277678838  | -4.739263199 |
| C82  | -2.364431466  | 8.160404966  | -4.406725215 |
| C83  | 0.283774170   | 5.832874755  | 1.246015757  |
| C84  | -0.040915693  | 6.946859746  | 2.243045277  |
| C85  | 1.085096774   | 4.748099020  | 2.001847481  |
| C86  | 0.895475230   | 8.868161212  | 3.427153614  |
| C87  | 0.355358476   | 10.255307077 | 3.121724069  |
| C88  | -0.640712859  | 11.712528226 | 1.449049953  |
| C89  | -2.024832104  | 12.251794321 | 1.890071211  |
| C90  | -0.443583759  | 11.891719515 | -0.058369013 |
| C91  | -1.462052550  | 11.149304898 | -0.912667329 |
| C92  | -4.253847994  | 11.711768086 | 2.761094113  |
| C93  | -4.377276632  | 12.672825940 | 3.933205772  |
| C94  | -5.057193029  | 10.411583970 | 3.054089407  |
| C95  | -5.080639217  | 9.475214503  | 1.865615466  |
| C96  | -6.064396754  | 9.610265611  | 0.875083750  |
| C97  | -4.094419005  | 8.491762955  | 1.686921582  |
| C98  | -6.055166219  | 8.809205657  | -0.267989396 |
| C99  | -4.053620615  | 7.698483109  | 0.537419033  |
| C100 | -5.035533960  | 7.870495449  | -0.433733165 |
| C101 | 5.971237126   | -3.087874713 | -8.201680113 |
| C102 | 4.480776210   | -2.831468501 | -8.059176428 |
| C103 | 2.776514892   | -1.410372482 | -6.940603644 |
| C104 | 2.454435458   | 0.008510102  | -7.430079099 |
| C105 | 2.876181010   | 2.398787082  | -7.028285150 |
| C106 | 4.071662955   | 3.308873611  | -6.757763761 |
| C107 | 6.147308889   | 3.764658705  | -5.573843533 |
| C108 | 7.045736594   | 4.101424942  | -6.746407420 |
| C109 | -0.618397408  | -2.353050570 | -9.869968845 |
| C110 | -1.666528540  | -1.257740114 | -9.646637648 |
| C111 | -0.467649175  | -3.205358265 | -8.587975297 |
| C112 | 0.268315662   | -4.525340295 | -8.882276401 |
| C113 | 0.664819611   | -5.215504502 | -7.597907815 |
| C114 | -2.158442917  | 0.990439296  | -8.829922320 |
| C115 | -1.498663595  | 2.312799511  | -9.165736305 |
| C116 | -2.900792697  | 0.965423177  | -7.470487463 |
| C117 | -1.905836290  | 0.844076807  | -6.354090940 |
| C118 | -1.250899777  | 1.981846300  | -5.852370138 |
| C119 | -1.476840989  | -0.428264823 | -5.941223439 |
| C120 | -0.133427204  | 1.839804150  | -5.024766487 |
| C121 | -0.361680069  | -0.566399556 | -5.113865636 |
| C122 | 0.334283714   | 0.567564732  | -4.687653777 |
| C123 | 8.631365517   | -6.083830063 | -3.601003125 |
| C124 | 9.561946491   | -6.356381081 | -2.408799509 |

|       |              |               |              |
|-------|--------------|---------------|--------------|
| C125  | 7.188271955  | -6.502784524  | -3.282309162 |
| C126  | 6.143613039  | -6.093517548  | -4.272189468 |
| C127  | 6.042830360  | -6.488816148  | -5.590543091 |
| C128  | 4.226739516  | -5.355935164  | -5.025377790 |
| C129  | 10.331057366 | -7.842266399  | -0.656203087 |
| C130  | 11.795050395 | -7.593836351  | -0.942760165 |
| C131  | 0.496089050  | -6.909430185  | -0.871099272 |
| C132  | 1.876419914  | -7.092495271  | -0.245745191 |
| C133  | 3.050951829  | -7.113161653  | -1.268887929 |
| C134  | 3.073578499  | -8.474382082  | -2.019332319 |
| C135  | 4.330885030  | -8.749918897  | -2.848746867 |
| C136  | 4.406109118  | -10.175096990 | -3.440273084 |
| C137  | 4.385216074  | -6.964529820  | -0.520659419 |
| C138  | 3.923995359  | -0.725955068  | -1.340066832 |
| Fe139 | 4.511107963  | -1.804315524  | -2.943798491 |
| Fe140 | 2.401815184  | 0.294946678   | -0.720111266 |
| Fe141 | 4.959439030  | 0.353618592   | -0.017078178 |
| Fe142 | 4.370083707  | 0.718874459   | -2.518762546 |
| Fe143 | 3.984738943  | 2.697369960   | -0.728441370 |
| Fe144 | 5.006243349  | -2.200174486  | -0.447691649 |
| Fe145 | 2.524128787  | -2.170011170  | -1.117766702 |
| H146  | -6.476267123 | -7.294590833  | -2.088471519 |
| H147  | -6.407631897 | -6.150804901  | -3.250582926 |
| H148  | -9.884740742 | -4.498290376  | -1.435470572 |
| H149  | -8.768418305 | -5.737753521  | -3.096777348 |
| H150  | -8.880152254 | -7.023373756  | -1.900049982 |
| H151  | -8.154408125 | -2.694206121  | -0.147491635 |
| H152  | -9.484258605 | -5.667759962  | 1.219209894  |
| H153  | -9.907329749 | -2.819694062  | 0.120277749  |
| H154  | -9.171107730 | -6.601221102  | 3.325343615  |
| H155  | -6.831742244 | -5.938797681  | 1.475306657  |
| H156  | -9.131038462 | -4.965924798  | 4.023909581  |
| H157  | -3.551531685 | -2.007426802  | 2.217375930  |
| H158  | -5.759743176 | -3.708620260  | 1.489147582  |
| H159  | -4.542923038 | -6.329034598  | 1.601341249  |
| H160  | -6.218377022 | -0.547258993  | 5.843731714  |
| H161  | -6.776412724 | -2.514833558  | 3.806245584  |
| H162  | -4.653406065 | -6.585359726  | 3.360528708  |
| H163  | -5.177697172 | -1.500026760  | 1.714543981  |
| H164  | -6.006002444 | -4.171493872  | 5.953214964  |
| H165  | -7.477421868 | -1.812594831  | 5.902020163  |
| H166  | -1.312136052 | -3.094032483  | 2.530481349  |
| H167  | -1.350177861 | -1.806232294  | 1.296202727  |
| H168  | 0.203513452  | -2.319501261  | 1.948588573  |
| H169  | -2.031944107 | -0.847641054  | 3.466701208  |
| H170  | -5.333662413 | -5.489869827  | 7.747865677  |
| H171  | -2.428863297 | 2.161428827   | 4.536682929  |
| H172  | -3.083882231 | -0.699923120  | 7.961948212  |
| H173  | -3.112572881 | 2.768553548   | 8.806688763  |
| H174  | -0.756512522 | 0.587980707   | 1.941307741  |
| H175  | 0.783445030  | 0.053172364   | 2.609977985  |
| H176  | 7.957197982  | 0.756618317   | 6.801462466  |
| H177  | -3.436387266 | 3.498196879   | 5.125086453  |
| H178  | -3.744230100 | 3.897436782   | 7.584365327  |
| H179  | -1.675136268 | 3.536298060   | 5.381236581  |
| H180  | -1.998877264 | 3.839981183   | 7.926593977  |
| H181  | -3.656239023 | 1.568293303   | 6.680009530  |
| H182  | -0.610402420 | 1.803463915   | 6.951090125  |
| H183  | -2.328982793 | -0.105143650  | 5.515898692  |
| H184  | -0.341047789 | 1.021825863   | 3.611825920  |
| H185  | 1.555242733  | 4.071160244   | 1.271285341  |
| H186  | 0.361619845  | 4.174463974   | 2.600301711  |
| H187  | 2.144562529  | 4.789760451   | 3.660581753  |
| H188  | 2.033012511  | 3.745444344   | 6.100053625  |
| H189  | 4.328917294  | 3.641410868   | 3.407747006  |
| H190  | 6.145466890  | 1.960072391   | 3.270275130  |
| H191  | 4.950608068  | 0.363281576   | 7.098672562  |
| H192  | -2.149179984 | -2.696077626  | 5.127451585  |
| H193  | -1.420450348 | -5.764589709  | 5.369259836  |
| H194  | -1.028603412 | -5.355684929  | 7.056040810  |
| H195  | -3.475703943 | -4.584699409  | 5.576893585  |
| H196  | -5.086024662 | -4.032540406  | 8.738360155  |
| H197  | 3.100545473  | 2.008861860   | 7.207366626  |
| H198  | 0.638988488  | -1.907747879  | 4.483506117  |
| H199  | -3.085371493 | -0.177647343  | 10.682862300 |
| H200  | -3.165568396 | -1.805261765  | 9.962823085  |
| H201  | -0.438700600 | -1.550501054  | 9.909884919  |
| H202  | 9.748292821  | -8.206536607  | 5.524659371  |
| H203  | -0.862182881 | -5.457799671  | -5.088207081 |
| H204  | 1.526316707  | -5.925088212  | -2.180389698 |
| H205  | -0.399057926 | -5.195683395  | -9.441436118 |
| H206  | 1.159609783  | -4.332627145  | -9.497338010 |

|      |               |              |               |
|------|---------------|--------------|---------------|
| H207 | -1.457456532  | -3.432151908 | -8.161594566  |
| H208 | -0.620932322  | 2.233822975  | -9.851030861  |
| H209 | -1.079020632  | -2.995385003 | -10.636732694 |
| H210 | -2.832016119  | -1.825368282 | -3.246705190  |
| H211 | -3.680772310  | -4.704960028 | -2.620551827  |
| H212 | -0.257955323  | -0.008592356 | -8.766126931  |
| H213 | -2.933071296  | 0.877238145  | -9.615986917  |
| H214 | 1.168745268   | -1.300047362 | -9.745656217  |
| H215 | -0.819558969  | -5.500020363 | -3.330309374  |
| H216 | 0.068718089   | -2.614450185 | -7.828644742  |
| H217 | 1.201432095   | -2.570307885 | -10.791791355 |
| H218 | -5.988700623  | -2.837541443 | -4.767976481  |
| H219 | -3.332181131  | -2.233802978 | -1.616483054  |
| H220 | 2.450181657   | -4.412851153 | -7.790241310  |
| H221 | -2.115775662  | -4.138546893 | -2.059264995  |
| H222 | -4.479521027  | 2.333841889  | 2.471650474   |
| H223 | -3.501111603  | 0.404879603  | 0.962817919   |
| H224 | -8.865856041  | 0.633699174  | 1.928241914   |
| H225 | -7.377891457  | 0.044196250  | -0.599058804  |
| H226 | -7.233877862  | 4.074953017  | 1.164179859   |
| H227 | -8.964717883  | 8.484214425  | 3.490381157   |
| H228 | -7.876096725  | 4.788693924  | 4.206863313   |
| H229 | -9.436220286  | 5.348631833  | 1.983067798   |
| H230 | -6.670660769  | 6.703010894  | 2.120076251   |
| H231 | -10.728367493 | 9.785531426  | -0.136043819  |
| H232 | -3.427584910  | 4.081987556  | 1.050197334   |
| H233 | -4.765145502  | 3.995346010  | -0.105649398  |
| H234 | -10.137197244 | 10.400337578 | 2.272569634   |
| H235 | -8.519779091  | 5.738369827  | 0.526968274   |
| H236 | -6.326147390  | 2.022115171  | 0.208979259   |
| H237 | -7.727689106  | -0.705028597 | 1.744796921   |
| H238 | -9.596453315  | 2.265335038  | -2.234433026  |
| H239 | -1.738417563  | 1.301187213  | -2.745747069  |
| H240 | -9.951993725  | 0.539723301  | -2.433414076  |
| H241 | 9.399116938   | 2.147169962  | 5.515202021   |
| H242 | 7.927264631   | 2.376157421  | 4.840702120   |
| H243 | 1.917819194   | 5.921431076  | -0.160479378  |
| H244 | -0.677603679  | 5.399824729  | 0.942033079   |
| H245 | 1.765350017   | 7.815198091  | 1.814171306   |
| H246 | -2.900629520  | 3.459215542  | -1.882870001  |
| H247 | -4.266018381  | 4.564780645  | -3.251269777  |
| H248 | -5.409766293  | 4.008511152  | -5.087294242  |
| H249 | -4.173340226  | 5.666430538  | -2.115995004  |
| H250 | -4.364589425  | 1.826888568  | -4.889878608  |
| H251 | -6.131539100  | 1.905908705  | -5.192162918  |
| H252 | 0.587172991   | 11.624317951 | -0.330318907  |
| H253 | -0.574163386  | 12.963775056 | -0.271748598  |
| H254 | 0.060722351   | 10.380263906 | -2.083190069  |
| H255 | -1.587719214  | 9.915065903  | -2.496991886  |
| H256 | -1.992574580  | 9.922475041  | -5.387000953  |
| H257 | -1.106702594  | 5.552101935  | -5.491085018  |
| H258 | -6.838296855  | 8.917153352  | -1.022433697  |
| H259 | -3.335933123  | 8.318673936  | 2.455656415   |
| H260 | -3.765202896  | 8.142053377  | -2.893379169  |
| H261 | 1.996092695   | 5.609820686  | -2.692204944  |
| H262 | 3.139988690   | 7.288547110  | -1.538147986  |
| H263 | -0.523630129  | 5.211850198  | -2.858162312  |
| H264 | -7.833977807  | 0.209395729  | -3.308476495  |
| H265 | 4.698385796   | 10.128134990 | -1.835052229  |
| H266 | -5.197674939  | -0.399485318 | -4.385982354  |
| H267 | 1.879407292   | 6.769865171  | -4.011256328  |
| H268 | -3.242053243  | 6.984261340  | 0.389839731   |
| H269 | 4.012076525   | 10.242835636 | -0.201242367  |
| H270 | -1.123674107  | 8.556983861  | -6.004689437  |
| H271 | -3.883874174  | 9.468948179  | -4.004647594  |
| H272 | -4.328598502  | -2.957608982 | -4.939359049  |
| H273 | -5.511211046  | -3.131526813 | -2.531362434  |
| H274 | -6.860881140  | 10.347805674 | 0.997828634   |
| H275 | -4.775702707  | 1.657175959  | -2.451569617  |
| H276 | 0.536551201   | 8.308889830  | -2.582950382  |
| H277 | -0.150264314  | 7.021541277  | -5.271465812  |
| H278 | 0.515971632   | 4.667861895  | -4.162601889  |
| H279 | -2.542897629  | 6.315144461  | -3.568030047  |
| H280 | 0.294387368   | 8.451303476  | 4.249679747   |
| H281 | -0.286926119  | 9.590787414  | 1.295093682   |
| H282 | 0.061855726   | 12.399745893 | 1.946322877   |
| H283 | 1.925375627   | 8.993582855  | 3.787720567   |
| H284 | -2.589402004  | 10.395649465 | 2.482856782   |
| H285 | 6.523439888   | -2.141648194 | -8.101929243  |
| H286 | 6.251845400   | -3.714060968 | -7.329110705  |
| H287 | 8.664100438   | -4.993903808 | -3.747475406  |
| H288 | 7.208578637   | -4.097669252 | -9.466094206  |

|       |              |               |              |
|-------|--------------|---------------|--------------|
| H289  | 5.626930292  | -4.487642176  | -9.637053268 |
| H290  | 5.534898789  | 4.462920114   | 1.072465804  |
| H291  | 5.714959953  | 6.941163714   | 2.815740073  |
| H292  | 5.636415226  | 8.063420970   | -1.302120042 |
| H293  | 4.106982597  | 5.363976191   | 1.681736766  |
| H294  | 6.992556677  | 7.578189375   | 2.017701180  |
| H295  | 6.767503085  | 3.252215326   | -4.820668566 |
| H296  | 6.406670059  | 6.489830224   | -0.002742265 |
| H297  | 3.845438603  | -7.728518352  | 5.096216483  |
| H298  | 6.056052285  | -8.465264872  | 3.101117946  |
| H299  | 5.021635827  | 1.957932563   | -5.474334485 |
| H300  | 4.022252277  | -0.594125799  | 4.054057784  |
| H301  | 2.634013637  | 2.479840525   | -8.094775371 |
| H302  | -0.033739644 | -1.557838046  | -4.798491008 |
| H303  | 2.022606286  | 2.824202353   | -6.472908907 |
| H304  | 3.132726021  | -5.102900807  | 4.929826263  |
| H305  | 3.480893871  | 0.707176392   | -5.819549908 |
| H306  | 2.933130981  | -5.478796856  | 3.208599669  |
| H307  | 3.693476752  | -7.801062271  | 3.324388702  |
| H308  | 5.452758187  | -5.983338085  | 3.129085506  |
| H309  | 5.477305355  | -5.829157393  | 4.893479361  |
| H310  | -3.591837232 | 0.111095283   | -7.481583786 |
| H311  | 4.403020832  | -10.202580180 | 4.900306657  |
| H312  | 4.007490311  | -12.481457961 | 2.891563669  |
| H313  | 1.219469044  | 0.482399076   | -4.059836967 |
| H314  | 4.667942971  | -12.616205186 | 5.729661715  |
| H315  | 3.254704071  | -12.944608178 | 4.969148902  |
| H316  | 4.644029977  | -3.735420424  | 2.736234738  |
| H317  | 0.389074422  | 2.715300799   | -4.637044087 |
| H318  | -2.011142217 | -1.317372409  | -6.283036772 |
| H319  | 7.608989326  | -10.128497221 | -1.105292200 |
| H320  | 7.146418254  | -7.602541794  | -3.195006691 |
| H321  | 6.299009775  | -8.524905557  | 0.393164602  |
| H322  | 7.013644056  | -10.549178234 | -2.479324531 |
| H323  | 6.998303574  | 3.381876039   | -7.598974095 |
| H324  | 6.215945426  | -5.389595191  | 0.519940845  |
| H325  | 1.875821707  | -8.002007328  | 0.366583598  |
| H326  | 4.881409834  | -1.303369829  | -6.756559399 |
| H327  | 2.974350601  | -9.256218021  | -1.250855604 |
| H328  | 4.420459569  | -6.183061023  | -6.957009052 |
| H329  | 3.243097841  | -4.912988080  | -5.109514698 |
| H330  | 5.512804062  | -13.080481236 | 3.596595205  |
| H331  | 4.873389170  | -1.476376497  | 2.811627638  |
| H332  | 7.886553897  | -6.358429382  | 1.903107429  |
| H333  | 7.070761890  | -4.170218581  | 0.961912940  |
| H334  | 7.960199525  | -7.665946970  | 3.860690006  |
| H335  | 2.273141254  | -3.262288892  | 5.446025738  |
| H336  | 4.372373079  | -8.045430041  | -3.693284323 |
| H337  | 5.231675604  | -8.582564924  | -2.243426183 |
| H338  | 2.180615580  | -8.534917164  | -2.659869778 |
| H339  | 2.634675402  | -1.483432675  | -5.851302491 |
| H340  | -1.595797663 | 2.974649052   | -6.151561097 |
| H341  | -3.491542490 | 1.891169971   | -7.404652979 |
| H342  | 2.012295666  | -6.235289481  | 0.435463124  |
| H343  | 8.009620263  | -7.873427265  | 1.573944753  |
| H344  | 6.846892973  | -9.721350802  | 1.208036865  |
| H345  | 2.713153754  | -1.631717517  | 5.586800971  |
| H346  | 6.708522141  | -7.078658844  | -6.208594417 |
| H347  | 6.908290461  | -6.109480331  | -2.298345532 |
| H348  | 2.099234726  | -2.104928241  | -7.441954949 |
| H349  | 5.772668351  | 4.696555822   | -5.121878685 |
| H350  | 6.525389891  | -0.884874970  | 5.643660103  |
| H351  | 7.008365571  | -0.241691757  | 4.057469423  |
| H352  | 10.069443497 | -6.361654216  | -5.035581811 |
| H353  | 9.215192513  | -7.719585659  | -4.712334023 |
| H354  | 10.220271801 | -8.907970498  | -0.400769583 |
| H355  | 8.825419185  | -8.299546554  | -2.094367279 |
| H356  | 12.090081256 | -7.711433491  | -2.013440168 |
| H357  | 10.022188617 | -7.256619699  | 0.223870820  |
| H358  | 9.599848360  | -0.728046889  | 4.642133695  |
| H359  | -3.500654696 | 12.692264071  | 4.622632528  |
| H360  | 8.486821657  | -8.156493329  | 6.784346515  |
| H361  | 8.281659256  | -5.538344887  | 5.895860420  |
| H362  | -4.687604573 | 12.205837180  | 1.876347094  |
| H363  | -4.618505130 | 9.913037714   | 3.932641960  |
| H364  | -6.079725177 | 10.713078881  | 3.323301122  |
| H365  | -5.808664320 | 7.147697335   | -2.069821117 |
| H366  | 2.746132055  | -1.254791855  | 1.192916636  |
| H367  | 0.011358889  | -1.022760022  | -0.675628456 |
| Mo368 | 4.167005502  | -4.310569415  | -1.958767748 |
| N369  | 2.053045877  | -1.157825859  | 0.433647027  |
| N370  | -7.018272687 | -6.862235467  | -2.841045077 |

|      |               |               |               |
|------|---------------|---------------|---------------|
| N371 | -9.070504954  | -4.472322249  | -0.826810139  |
| N372 | -9.049060903  | -5.070927350  | 1.919213476   |
| N373 | -6.428713387  | -5.964879375  | 2.413924929   |
| N374 | -5.008501114  | -3.519339734  | 2.148053791   |
| N375 | -6.071844930  | -2.058515760  | 4.389963583   |
| N376 | -5.530085316  | -3.690732673  | 6.720785779   |
| N377 | -2.853455335  | -4.626331653  | 6.387953314   |
| N378 | -1.130363355  | -2.727383225  | 5.164752467   |
| N379 | -1.476931763  | 0.161251332   | 6.013317049   |
| N380 | -2.427382421  | -0.367343698  | 8.667666984   |
| N381 | 4.041701603   | -12.294621702 | 4.988641999   |
| N382 | 5.026582711   | -9.937141868  | 4.130674355   |
| N383 | 4.111063330   | -3.792551314  | 3.605918940   |
| N384 | 3.014726202   | -2.560895929  | 5.288486383   |
| N385 | 4.203679860   | -1.485701158  | 3.602991103   |
| N386 | 7.764166110   | -7.901577324  | 4.859729956   |
| N387 | -5.097047734  | -2.401382808  | -4.521330730  |
| N388 | -1.266330269  | -5.170942378  | -4.192097684  |
| N389 | -5.486238823  | -0.036972526  | -3.462058315  |
| N390 | -7.958430883  | 1.038667484   | -2.731999358  |
| N391 | -8.108699797  | 0.434084439   | 0.012442556   |
| N392 | -6.120684377  | 2.016205473   | 1.211004156   |
| N393 | -2.872489653  | 2.552836343   | -1.396005800  |
| N394 | -2.479067847  | 0.412482858   | -0.931526092  |
| N395 | -6.778272764  | 4.604362487   | 1.903493397   |
| N396 | -9.818267442  | 7.887486856   | 0.326710246   |
| N397 | -9.940732183  | 9.497628779   | 1.848704713   |
| N398 | 8.667971822   | 1.681609490   | 4.972081235   |
| N399 | 6.395930066   | 6.747498180   | 2.074051239   |
| N400 | 4.925629592   | 8.415777216   | -0.666479287  |
| N401 | 2.428688866   | 7.989824554   | -1.777664339  |
| N402 | -1.933981953  | 6.927419695   | -4.151671867  |
| N403 | -1.845677278  | 8.917970159   | -5.392103423  |
| N404 | -3.329235899  | 8.704044187   | -3.629912620  |
| N405 | 0.977626793   | 6.309464948   | 0.046696249   |
| N406 | 0.879524078   | 7.949481672   | 2.307849958   |
| N407 | -0.307913374  | 10.387179408  | 1.932494803   |
| N408 | -0.950502137  | 10.555560805  | -2.026240911  |
| N409 | -2.858115016  | 11.376365361  | 2.505606797   |
| N410 | 6.267221529   | -3.700056545  | -9.499524668  |
| N411 | 4.143124165   | -1.787803528  | -7.273732612  |
| N412 | 3.034163851   | 0.990857035   | -6.707054370  |
| N413 | 5.060764316   | 2.870929949   | -5.939082015  |
| N414 | 0.615397623   | -1.807046613  | -10.447186129 |
| N415 | -1.236294040  | -0.107910171  | -9.054255716  |
| N416 | 9.124753353   | -6.707236405  | -4.843506117  |
| N417 | 4.997810889   | -5.369985714  | -3.938514029  |
| N418 | 4.831897077   | -6.012628608  | -6.043027281  |
| N419 | 9.495467570   | -7.578440137  | -1.814582498  |
| N420 | -0.408243387  | 2.970291954   | 0.158911567   |
| N421 | 0.050276740   | 1.964457376   | 0.066152659   |
| O422 | -6.922079071  | -5.162206667  | -0.511993572  |
| O423 | -8.138567537  | -3.028242465  | 2.362426255   |
| O424 | -6.765359841  | -5.605308811  | 4.646701469   |
| O425 | -3.483176540  | -4.368207125  | 3.604217908   |
| O426 | -4.048495987  | -1.029300904  | 4.491352660   |
| O427 | -5.092340684  | -1.709998750  | 7.772557543   |
| O428 | -2.694870454  | -4.841060025  | 8.668409839   |
| O429 | 0.678937863   | -4.055873492  | 5.686820190   |
| O430 | 0.772250508   | -0.193805200  | 6.265487047   |
| O431 | -0.873481957  | 1.141713703   | 9.341570249   |
| O432 | -1.042319336  | -1.283456146  | 11.841050643  |
| O433 | 6.225842766   | -10.914804743 | 2.409962771   |
| O434 | 6.222515203   | -8.648492007  | 6.392081828   |
| O435 | 10.176818295  | -5.857542316  | 6.579829797   |
| O436 | -5.778899318  | -0.847371070  | -1.326831543  |
| O437 | -2.786815448  | -3.862593509  | -5.260679840  |
| O438 | -6.894855164  | 2.771375033   | -1.694780041  |
| O439 | -5.327687107  | 3.569681177   | -4.221892199  |
| O440 | -10.091251311 | 1.583565520   | 0.164611472   |
| O441 | -6.613308526  | 1.168959366   | 3.275113548   |
| O442 | -5.042008310  | 4.673463169   | 3.379086228   |
| O443 | -7.592106368  | 6.773634744   | 4.583286441   |
| O444 | 9.442237856   | -1.318019280  | 6.588975755   |
| O445 | 2.601381316   | 3.876101716   | 5.319544180   |
| O446 | 3.880069794   | 8.151517962   | 1.343231920   |
| O447 | 1.978822152   | 10.242088525  | -1.864340129  |
| O448 | -0.887344087  | 7.356095427   | -0.768233145  |
| O449 | -1.044924074  | 6.884261187   | 2.963810118   |
| O450 | 2.083685663   | 5.329576700   | 2.846480898   |
| O451 | 0.507427682   | 11.188654517  | 3.920443336   |
| O452 | -2.310036206  | 13.447346703  | 1.727303006   |



|                                                                                                                                                                                                                                                     |      |              |                                      |              |
|-----------------------------------------------------------------------------------------------------------------------------------------------------------------------------------------------------------------------------------------------------|------|--------------|--------------------------------------|--------------|
|                                                                                                                                                                                                                                                     | O453 | -2.670652640 | 11.142291676                         | -0.640460858 |
|                                                                                                                                                                                                                                                     | O454 | -5.371024765 | 13.353297548                         | 4.135999763  |
|                                                                                                                                                                                                                                                     | O455 | -4.948360594 | 7.100888651                          | -1.609358256 |
|                                                                                                                                                                                                                                                     | O456 | 3.644120724  | -3.582556878                         | -8.617581111 |
|                                                                                                                                                                                                                                                     | O457 | 1.738636444  | 0.214357414                          | -8.431883565 |
|                                                                                                                                                                                                                                                     | O458 | 4.088736706  | 4.444184679                          | -7.263061431 |
|                                                                                                                                                                                                                                                     | O459 | 7.804936815  | 5.057317558                          | -6.758352744 |
|                                                                                                                                                                                                                                                     | O460 | -2.854559539 | -1.424738349                         | -9.971614630 |
|                                                                                                                                                                                                                                                     | O461 | -0.097628389 | -5.914649594                         | -6.940386255 |
|                                                                                                                                                                                                                                                     | O462 | 1.919482036  | -4.985418408                         | -7.155730339 |
|                                                                                                                                                                                                                                                     | O463 | -1.901572754 | 3.402136932                          | -8.783322755 |
|                                                                                                                                                                                                                                                     | O464 | 10.392031903 | -5.508481642                         | -2.027035080 |
|                                                                                                                                                                                                                                                     | O465 | 12.625985824 | -7.358542335                         | -0.076300803 |
|                                                                                                                                                                                                                                                     | O466 | 0.469482580  | -6.133907918                         | -1.957726430 |
|                                                                                                                                                                                                                                                     | O467 | -0.524118067 | -7.391192810                         | -0.379732409 |
|                                                                                                                                                                                                                                                     | O468 | 5.538206201  | -10.773357001                        | -3.381942262 |
|                                                                                                                                                                                                                                                     | O469 | 3.360827652  | -10.642283311                        | -3.973923770 |
|                                                                                                                                                                                                                                                     | O470 | 5.140333263  | -5.955361590                         | -0.867355698 |
|                                                                                                                                                                                                                                                     | O471 | 4.714905829  | -7.797198234                         | 0.345383239  |
|                                                                                                                                                                                                                                                     | O472 | 2.878813707  | -6.005522491                         | -2.158714383 |
|                                                                                                                                                                                                                                                     | O473 | 8.366881925  | -7.175216429                         | 2.189223028  |
|                                                                                                                                                                                                                                                     | O474 | 6.735476525  | -5.027975137                         | 1.283117700  |
|                                                                                                                                                                                                                                                     | O475 | -3.632507189 | 5.114438638                          | -2.722662512 |
|                                                                                                                                                                                                                                                     | O476 | 7.876856713  | -10.519762357                        | -1.966666422 |
|                                                                                                                                                                                                                                                     | O477 | 7.136905931  | -9.038035776                         | 0.551657319  |
|                                                                                                                                                                                                                                                     | S478 | 3.948944117  | 4.987073373                          | -0.714206489 |
|                                                                                                                                                                                                                                                     | S479 | 2.558249909  | 2.001334933                          | -2.361450849 |
|                                                                                                                                                                                                                                                     | S480 | 2.669455416  | -3.038968853                         | -3.260141216 |
|                                                                                                                                                                                                                                                     | S481 | 3.338926347  | 1.478292175                          | 1.037040478  |
|                                                                                                                                                                                                                                                     | S482 | 0.705099236  | -0.939450034                         | -1.832385006 |
|                                                                                                                                                                                                                                                     | S483 | 5.044863359  | -0.203944074                         | -4.398123122 |
|                                                                                                                                                                                                                                                     | S484 | 3.427922482  | -3.695251920                         | 0.205694413  |
|                                                                                                                                                                                                                                                     | S485 | 5.957024326  | 1.805788433                          | -1.398287409 |
|                                                                                                                                                                                                                                                     | S486 | 6.190727527  | -3.056662552                         | -2.126953670 |
|                                                                                                                                                                                                                                                     | S487 | 6.203090756  | -1.137509628                         | 1.056928387  |
|                                                                                                                                                                                                                                                     | end  |              |                                      |              |
| <b>Fe2-brNH-Fe6-S2BH</b><br><b>2N2 TS</b><br><b>35, S=1/2</b><br><br><b>Fe( 139) -2.473</b><br><b>Fe( 140) -0.317</b><br><b>Fe( 141) -2.616</b><br><b>Fe( 142) 2.624</b><br><b>Fe( 143) 3.160</b><br><b>Fe( 144) 1.866</b><br><b>Fe( 145) 0.569</b> |      |              | <b>bm602b26nh2n2x3dte 1 53144.96</b> |              |
|                                                                                                                                                                                                                                                     | C1   | -2.005358503 | -5.935013350                         | -7.319312542 |
|                                                                                                                                                                                                                                                     | C2   | -1.192244808 | -6.046408758                         | -8.614305264 |
|                                                                                                                                                                                                                                                     | C3   | -4.263867086 | -5.715543284                         | -6.370823466 |
|                                                                                                                                                                                                                                                     | C4   | -4.269930445 | -6.788874889                         | -5.286682765 |
|                                                                                                                                                                                                                                                     | C5   | -3.683618693 | -9.067883108                         | -4.632144692 |
|                                                                                                                                                                                                                                                     | C6   | -2.629569450 | -8.761573045                         | -3.561465652 |
|                                                                                                                                                                                                                                                     | C7   | -0.608961624 | -7.525137898                         | -2.974013667 |
|                                                                                                                                                                                                                                                     | C8   | -1.204894411 | -6.489444002                         | -2.017842451 |
|                                                                                                                                                                                                                                                     | C9   | -2.753886644 | -4.618378707                         | -1.734161980 |
|                                                                                                                                                                                                                                                     | C10  | -3.675247775 | -5.261124802                         | -0.686189317 |
|                                                                                                                                                                                                                                                     | C11  | -5.383159286 | -6.900982651                         | -0.181903511 |
|                                                                                                                                                                                                                                                     | C12  | -4.711906504 | -7.773601943                         | 0.887527477  |
|                                                                                                                                                                                                                                                     | C13  | -3.172522083 | -9.621360002                         | 1.329695233  |
|                                                                                                                                                                                                                                                     | C14  | -1.955713093 | -9.124838137                         | 2.119531076  |
|                                                                                                                                                                                                                                                     | C15  | 0.053740896  | -7.713087573                         | 2.061959193  |
|                                                                                                                                                                                                                                                     | C16  | 0.128771494  | -6.297629322                         | 2.629127445  |
|                                                                                                                                                                                                                                                     | C17  | -0.850864263 | -4.008498951                         | 2.661273163  |
|                                                                                                                                                                                                                                                     | C18  | -1.828213962 | -3.842644151                         | 3.842939879  |
|                                                                                                                                                                                                                                                     | C19  | -1.155264757 | -3.048133498                         | 1.491575746  |
|                                                                                                                                                                                                                                                     | C20  | -1.351029808 | -1.613779104                         | 1.989089529  |
|                                                                                                                                                                                                                                                     | C21  | -0.063284743 | -3.113531730                         | 0.417141601  |
|                                                                                                                                                                                                                                                     | C22  | -4.185014353 | -3.851810571                         | 4.575721832  |
|                                                                                                                                                                                                                                                     | C23  | -4.312883473 | -5.119198167                         | 5.437700114  |
|                                                                                                                                                                                                                                                     | C24  | -5.539107340 | -3.425895475                         | 3.951900235  |
|                                                                                                                                                                                                                                                     | C25  | -6.660205758 | -3.414194609                         | 4.999033627  |
|                                                                                                                                                                                                                                                     | C26  | -5.421802348 | -2.051484027                         | 3.283008186  |
|                                                                                                                                                                                                                                                     | C27  | -4.574046728 | -7.528355533                         | 5.528376321  |
|                                                                                                                                                                                                                                                     | C28  | -3.599607168 | -7.683050512                         | 6.678229298  |
|                                                                                                                                                                                                                                                     | C29  | 9.871914237  | -9.334432396                         | 1.779207968  |
|                                                                                                                                                                                                                                                     | C30  | 9.634602513  | -7.936699189                         | 2.353167662  |
|                                                                                                                                                                                                                                                     | C31  | 8.010383153  | -6.597654408                         | 3.704566100  |
|                                                                                                                                                                                                                                                     | C32  | 8.206590716  | -6.789865755                         | 5.220518361  |
|                                                                                                                                                                                                                                                     | C33  | 6.536223445  | -6.321305323                         | 3.351262522  |
|                                                                                                                                                                                                                                                     | C34  | 5.977451714  | -5.052322291                         | 4.002820272  |
|                                                                                                                                                                                                                                                     | C35  | 4.579699789  | -4.711032568                         | 3.475431218  |
|                                                                                                                                                                                                                                                     | C36  | 3.004172225  | -3.029015917                         | 4.517331634  |
|                                                                                                                                                                                                                                                     | C37  | 9.194767932  | -5.857400023                         | 7.259287101  |
|                                                                                                                                                                                                                                                     | C38  | 8.393869400  | -4.870888584                         | 8.080747163  |
|                                                                                                                                                                                                                                                     | C39  | -1.028356945 | -1.632309723                         | -5.953585009 |
|                                                                                                                                                                                                                                                     | C40  | -2.404714368 | -1.167574778                         | -5.433551643 |
|                                                                                                                                                                                                                                                     | C41  | 0.011097259  | -1.474082261                         | -4.823353215 |
|                                                                                                                                                                                                                                                     | C42  | 1.351552717  | -2.204904485                         | -5.047252253 |
|                                                                                                                                                                                                                                                     | C43  | 2.423838962  | -1.424453375                         | -5.807171365 |
|                                                                                                                                                                                                                                                     | C44  | -3.783489701 | 0.890777825                          | -5.246541076 |

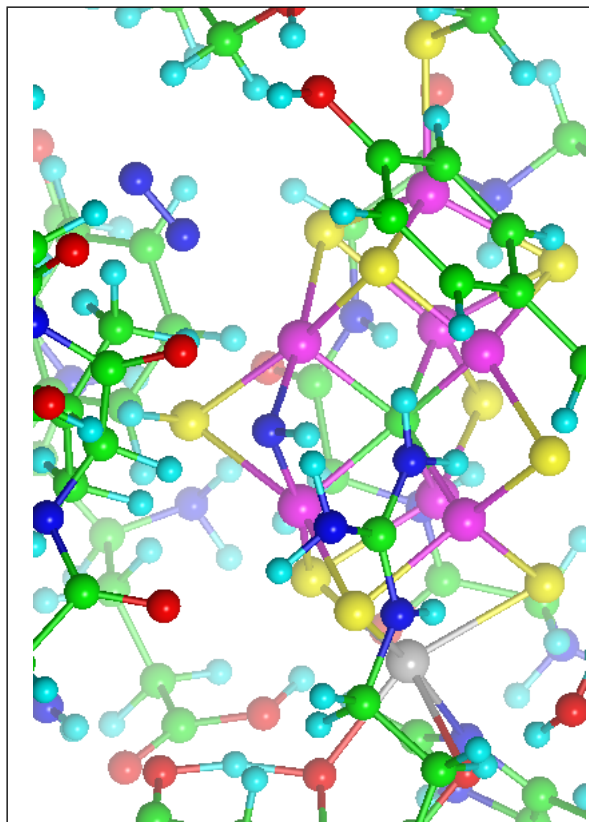

|      |               |              |              |
|------|---------------|--------------|--------------|
| C45  | -5.184572224  | 0.292808072  | -5.408013196 |
| C46  | -3.688110478  | 2.303356452  | -5.840414982 |
| C47  | -6.634995375  | -1.198768894 | -6.693791823 |
| C48  | -7.010272096  | -2.205737531 | -5.599563956 |
| C49  | -6.293391255  | -3.476692529 | -3.632948737 |
| C50  | -6.257062565  | -2.813001174 | -2.254710597 |
| C51  | -5.950979774  | -0.782891079 | -0.918020026 |
| C52  | -7.367199889  | -0.537962152 | -0.366759312 |
| C53  | -5.271762775  | 0.591256208  | -1.030054545 |
| C54  | -3.839669314  | 0.550205652  | -1.451897869 |
| C55  | -2.893778046  | -0.452149880 | -1.525799765 |
| C56  | -1.900415354  | 1.329371902  | -2.208521913 |
| C57  | -9.650372081  | 0.131787673  | -0.982046678 |
| C58  | -10.293709027 | -0.896882888 | -0.055063254 |
| C59  | -10.448158016 | 0.252480611  | -2.300872419 |
| C60  | -11.691479392 | 1.090531992  | -2.253416575 |
| C61  | -12.666057063 | 1.209374730  | -1.282229238 |
| C62  | -13.128550381 | 2.524484796  | -3.004827207 |
| C63  | 3.555891021   | -0.135545244 | 9.325103152  |
| C64  | 4.998949188   | -0.551602493 | 9.536702106  |
| C65  | 3.141558863   | -0.616551075 | 7.911228480  |
| C66  | 1.692791946   | -0.327295015 | 7.599105541  |
| C67  | 0.684524443   | -1.265749428 | 7.889839432  |
| C68  | 1.305390826   | 0.891311105  | 7.011843456  |
| C69  | -0.657951101  | -1.009191335 | 7.593116298  |
| C70  | -0.031789971  | 1.168830116  | 6.727504442  |
| C71  | -1.012006922  | 0.212393395  | 7.006980049  |
| C72  | -0.374016648  | 6.243216577  | 6.073522783  |
| C73  | -1.683201014  | 6.938909264  | 5.651838766  |
| C74  | -0.155306674  | 5.000881996  | 5.221740361  |
| C75  | -2.699187473  | 8.971664713  | 4.682135327  |
| C76  | -3.347742879  | 8.584729562  | 3.348875957  |
| C77  | -3.204962965  | 7.045700260  | 1.396223675  |
| C78  | -3.887342225  | 5.681651153  | 1.680649578  |
| C79  | -2.005198636  | 6.912724806  | 0.429007408  |
| C80  | -2.207838182  | 6.234021692  | -0.930354906 |
| C81  | -2.931770449  | 7.052655040  | -2.012071870 |
| C82  | -5.359080498  | 7.631732020  | -2.134531478 |
| C83  | -3.835457367  | 3.523925374  | 2.838262026  |
| C84  | -5.096738480  | 3.619572515  | 3.705716931  |
| C85  | -2.849006329  | 2.575613911  | 3.556446221  |
| C86  | -6.007193047  | 4.623018163  | 5.741974707  |
| C87  | -7.168291367  | 5.597647844  | 5.631957028  |
| C88  | -8.269601360  | 7.291676805  | 4.272526778  |
| C89  | -9.732668069  | 6.916051956  | 3.927382406  |
| C90  | -7.762441537  | 8.396300453  | 3.340888756  |
| C91  | -7.730663200  | 7.994932602  | 1.871843088  |
| C92  | -11.258732831 | 5.208869116  | 3.038905712  |
| C93  | -12.323694284 | 5.133011473  | 4.122892001  |
| C94  | -11.098933229 | 3.817236470  | 2.360225559  |
| C95  | -10.142707210 | 3.850883878  | 1.187943204  |
| C96  | -10.604966716 | 4.170723574  | -0.098798428 |
| C97  | -8.767273355  | 3.613733398  | 1.353293227  |
| C98  | -9.726447991  | 4.275633767  | -1.179812180 |
| C99  | -7.868852185  | 3.744755103  | 0.290452775  |
| C100 | -8.360663268  | 4.080780802  | -0.968600650 |
| C101 | 8.809884582   | 4.834581568  | -3.307523085 |
| C102 | 7.553705573   | 4.398273424  | -4.040037100 |
| C103 | 5.092340706   | 4.134728409  | -3.836579699 |
| C104 | 4.122202604   | 5.317629420  | -3.946891907 |
| C105 | 2.802257747   | 6.940907991  | -2.659555617 |
| C106 | 2.976570012   | 7.855976484  | -1.450672938 |
| C107 | 3.779541894   | 8.215555874  | 0.819699914  |
| C108 | 4.655190701   | 9.440699573  | 0.645352369  |
| C109 | 4.219459636   | 3.991643216  | -8.310522412 |
| C110 | 2.718822685   | 4.265336022  | -8.454647148 |
| C111 | 4.450917413   | 2.669648694  | -7.545287523 |
| C112 | 5.896938109   | 2.171918080  | -7.727482238 |
| C113 | 6.196846255   | 1.043732729  | -6.768573835 |
| C114 | 0.691119604   | 5.192080646  | -7.457083305 |
| C115 | 0.433422590   | 6.574778550  | -6.889809622 |
| C116 | -0.255909266  | 4.090694576  | -6.920048487 |
| C117 | 0.172353958   | 3.698957017  | -5.537273442 |
| C118 | -0.229378931  | 4.456653354  | -4.427222510 |
| C119 | 1.151143369   | 2.705454510  | -5.368618729 |
| C120 | 0.400814714   | 4.282016651  | -3.192965099 |
| C121 | 1.778542476   | 2.533622997  | -4.134740250 |
| C122 | 1.430199122   | 3.350934944  | -3.055642671 |
| C123 | 11.117045514  | 0.909340841  | 0.736317798  |
| C124 | 11.556871202  | 0.329799200  | 2.089074245  |
| C125 | 10.291527701  | -0.113503485 | -0.061136255 |
| C126 | 9.601542563   | 0.404788270  | -1.281160520 |

|       |              |               |              |
|-------|--------------|---------------|--------------|
| C127  | 10.193625309 | 0.877258232   | -2.435006882 |
| C128  | 8.005364155  | 0.749888217   | -2.734646094 |
| C129  | 12.445530231 | -1.514502125  | 3.378829542  |
| C130  | 13.420025627 | -0.647691508  | 4.144729936  |
| C131  | 4.993394507  | -4.179458555  | -2.516173375 |
| C132  | 5.886929298  | -4.246194361  | -1.273913045 |
| C133  | 7.082838026  | -3.250420160  | -1.288198600 |
| C134  | 8.204366312  | -3.781723180  | -2.224764079 |
| C135  | 9.529803694  | -3.015567506  | -2.170570206 |
| C136  | 10.663975995 | -3.649890371  | -3.007927485 |
| C137  | 7.660055364  | -3.116272134  | 0.126565259  |
| C138  | 3.655843162  | 1.667363526   | 1.193164295  |
| Fe139 | 5.244161040  | 2.072029303   | 0.002794403  |
| Fe140 | 1.675015963  | 1.515477833   | 1.000258453  |
| Fe141 | 3.439532083  | 2.089244721   | 3.160467300  |
| Fe142 | 3.448268619  | 3.603886273   | 1.047205318  |
| Fe143 | 1.505373466  | 3.851206325   | 2.800717801  |
| Fe144 | 5.035674859  | 0.471154773   | 1.982725549  |
| Fe145 | 3.391802711  | 0.007607472   | 0.079443733  |
| H146  | 0.653467688  | -6.299406921  | -7.782380933 |
| H147  | 0.346974816  | -4.759962817  | -8.228296747 |
| H148  | -3.739663236 | -5.923359363  | -8.427719142 |
| H149  | -1.658915179 | -5.406426842  | -9.380418041 |
| H150  | -1.309819335 | -7.083240430  | -8.973281925 |
| H151  | -4.004789200 | -4.769734205  | -5.871380072 |
| H152  | -3.515872457 | -8.178787225  | -6.585812153 |
| H153  | -5.284065166 | -5.618551949  | -6.764565450 |
| H154  | -3.407934997 | -9.999915824  | -5.143036302 |
| H155  | -1.568315717 | -7.578685647  | -4.881043047 |
| H156  | -4.631954384 | -9.232163552  | -4.104273129 |
| H157  | -2.037344745 | -3.991385300  | -1.192240891 |
| H158  | -2.226325741 | -5.599309039  | -3.567017436 |
| H159  | 0.244959032  | -7.084119735  | -3.505067694 |
| H160  | -5.953578981 | -6.124183650  | 0.343692524  |
| H161  | -4.473317234 | -6.531350278  | -2.104182479 |
| H162  | -0.242735289 | -8.356145469  | -2.358477193 |
| H163  | -3.342489089 | -3.971157079  | -2.397530055 |
| H164  | -3.587548193 | -8.725832522  | -0.571687410 |
| H165  | -6.083847914 | -7.522178733  | -0.756435367 |
| H166  | 0.070878909  | -4.134404836  | 0.031667156  |
| H167  | -0.330915544 | -2.456579367  | -0.425412953 |
| H168  | 0.897285286  | -2.745623891  | 0.807811427  |
| H169  | -2.104053916 | -3.380890638  | 1.040059820  |
| H170  | -2.847918811 | -10.490991147 | 0.739911297  |
| H171  | -4.627274651 | -2.024299256  | 2.524078158  |
| H172  | -4.365718968 | -6.361386301  | 3.761917756  |
| H173  | -6.824476063 | -4.402541449  | 5.452283762  |
| H174  | -1.654226963 | -0.985887685  | 1.142644657  |
| H175  | -0.418806509 | -1.192282429  | 2.393623086  |
| H176  | 2.938999864  | -0.681394667  | 10.064156341 |
| H177  | -6.364203034 | -1.780109033  | 2.786175581  |
| H178  | -7.602607833 | -3.095226407  | 4.529424839  |
| H179  | -5.202404910 | -1.275538330  | 4.034206822  |
| H180  | -6.429299800 | -2.705628881  | 5.810564761  |
| H181  | -5.801186750 | -4.172493114  | 3.179233006  |
| H182  | -3.851161737 | -3.068777139  | 5.272383099  |
| H183  | -3.431872693 | -4.208110094  | 2.591832208  |
| H184  | -2.134131187 | -1.535780894  | 2.757539916  |
| H185  | -1.847007297 | 2.696570295   | 3.116946264  |
| H186  | -3.200466964 | 1.550272959   | 3.367773819  |
| H187  | -2.663624340 | 1.988294490   | 5.425411891  |
| H188  | -2.895930570 | -0.233131038  | 6.868414479  |
| H189  | -0.315834535 | 2.107765046   | 6.250719662  |
| H190  | 2.066623051  | 1.623283535   | 6.734904243  |
| H191  | 0.954198178  | -2.224114633  | 8.343359144  |
| H192  | -1.502807313 | -5.715145298  | 1.545800352  |
| H193  | 0.828104097  | -7.777787939  | 1.281772189  |
| H194  | 0.334528727  | -8.392194145  | 2.876455366  |
| H195  | -1.440573218 | -7.851784472  | 0.568313458  |
| H196  | -3.908755570 | -9.962678570  | 2.068969179  |
| H197  | -1.421053497 | -1.765119556  | 7.794950198  |
| H198  | 0.140516680  | -3.779142418  | 3.070717663  |
| H199  | -5.602513169 | -7.602448150  | 5.919055183  |
| H200  | -4.410324495 | -8.373590883  | 4.841577161  |
| H201  | -2.607522920 | -7.198233234  | 6.525405052  |
| H202  | 10.267961566 | -5.701877920  | 7.448659373  |
| H203  | 4.448013994  | -1.164852639  | -5.928989059 |
| H204  | 5.632491461  | -2.331982207  | -2.490071866 |
| H205  | 6.023742658  | 1.796543093   | -8.752187978 |
| H206  | 6.603830484  | 2.999333693   | -7.570767224 |
| H207  | 3.757138665  | 1.893389251   | -7.904649462 |
| H208  | 1.322732292  | 7.247976851   | -6.882763658 |

|      |               |              |              |
|------|---------------|--------------|--------------|
| H209 | 4.548487345   | 3.829130067  | -9.348644680 |
| H210 | 0.190587549   | -0.401546295 | -4.654244244 |
| H211 | 1.184646654   | -3.144209473 | -5.605666809 |
| H212 | 2.639998898   | 5.115608254  | -6.562131466 |
| H213 | 0.464193118   | 5.309012991  | -8.536666264 |
| H214 | 4.776877212   | 5.320581483  | -6.812269177 |
| H215 | 3.949479737   | -2.214179369 | -4.608860102 |
| H216 | 4.216952486   | 2.825377851  | -6.480145281 |
| H217 | 5.940185082   | 5.051635669  | -7.947456378 |
| H218 | -0.942533189  | -1.329343261 | -7.996240564 |
| H219 | -0.439834635  | -1.851511518 | -3.895296143 |
| H220 | 7.030426756   | 2.364348894  | -5.575035756 |
| H221 | 1.761158413   | -2.511954041 | -4.073595488 |
| H222 | -5.437238279  | -1.412538673 | -0.177930604 |
| H223 | -3.020509655  | -1.502123101 | -1.279131726 |
| H224 | -7.306177634  | -3.882724786 | -3.761400136 |
| H225 | -5.052747694  | -2.269495893 | -4.889553588 |
| H226 | -8.052927710  | -0.425757161 | -2.297938208 |
| H227 | -12.784382313 | 0.752735123  | -0.305994369 |
| H228 | -9.986301663  | -1.948892857 | -0.269701909 |
| H229 | -10.662969998 | -0.760710883 | -2.685675941 |
| H230 | -9.622050919  | 1.104618890  | -0.465215175 |
| H231 | -13.661599213 | 3.250391917  | -3.614633087 |
| H232 | -5.368474249  | 1.075577067  | -0.043609089 |
| H233 | -5.844756203  | 1.208767229  | -1.741655381 |
| H234 | -14.411377038 | 2.446783468  | -1.306463957 |
| H235 | -9.786491907  | 0.725967366  | -3.044247349 |
| H236 | -5.795654831  | -0.950938576 | -3.056458575 |
| H237 | -5.608270895  | -4.337428484 | -3.612450340 |
| H238 | -7.473588904  | -0.491172387 | -6.752206256 |
| H239 | -1.156121124  | 2.044148372  | -2.553240506 |
| H240 | -6.582415230  | -1.731583714 | -7.652400514 |
| H241 | 3.535198815   | 1.603798912  | 10.409416899 |
| H242 | 2.545006078   | 1.631595354  | 9.109309283  |
| H243 | -2.271689100  | 5.013195923  | 2.834098374  |
| H244 | -4.145238802  | 3.048112388  | 1.896887610  |
| H245 | -4.210604698  | 5.137781515  | 4.760013636  |
| H246 | -3.634341366  | 2.605713505  | -2.008377180 |
| H247 | -4.832643975  | 3.675769951  | -3.571570798 |
| H248 | -4.738693445  | 3.957043132  | -5.790610298 |
| H249 | -5.823534059  | 3.824207824  | -2.343531916 |
| H250 | -2.672662663  | 2.688315716  | -5.649054036 |
| H251 | -3.854930427  | 2.260703407  | -6.928873836 |
| H252 | -6.783136907  | 8.753006990  | 3.688137432  |
| H253 | -8.471325908  | 9.234405316  | 3.427847569  |
| H254 | -5.779092538  | 8.664375160  | 1.718779808  |
| H255 | -6.507836981  | 7.967198722  | 0.273360247  |
| H256 | -5.884501275  | 9.616872558  | -2.063290134 |
| H257 | -2.484966442  | 6.851959159  | -2.997986276 |
| H258 | -10.106112442 | 4.503163324  | -2.179159458 |
| H259 | -8.365163115  | 3.307447605  | 2.322564908  |
| H260 | -6.828749563  | 6.203042565  | -1.922735876 |
| H261 | -1.217729277  | 6.348767448  | 0.954615906  |
| H262 | -1.825780992  | 7.269818084  | 3.005153482  |
| H263 | -2.688811913  | 5.249565655  | -0.816851301 |
| H264 | -4.589075857  | -0.681825706 | -7.100286646 |
| H265 | -2.397836471  | 10.025585221 | 4.616481109  |
| H266 | -2.003642438  | 0.481623129  | -6.466884015 |
| H267 | -1.600526265  | 7.925958017  | 0.269379708  |
| H268 | -6.799242894  | 3.616568920  | 0.456529252  |
| H269 | -3.491796404  | 8.894585990  | 5.439725135  |
| H270 | -4.210161488  | 9.323176861  | -2.408439329 |
| H271 | -7.386145076  | 7.783785232  | -2.361067843 |
| H272 | 0.378241984   | -0.737197385 | -7.158212879 |
| H273 | -1.144773493  | -2.713338992 | -6.158866083 |
| H274 | -11.671489360 | 4.335628129  | -0.267332600 |
| H275 | -3.626740945  | 0.950922987  | -4.160087859 |
| H276 | -3.979149463  | 7.695564658  | 0.980060931  |
| H277 | -2.790783419  | 8.122277687  | -1.811234099 |
| H278 | -1.198314835  | 6.032956790  | -1.312791772 |
| H279 | -4.603280971  | 5.744082302  | -2.234113951 |
| H280 | -6.429346122  | 3.614100834  | 5.863489257  |
| H281 | -6.632373216  | 6.009363517  | 3.700449919  |
| H282 | -8.358039440  | 7.733484405  | 5.277789003  |
| H283 | -5.462586752  | 4.876980943  | 6.661020117  |
| H284 | -9.162299939  | 5.035705541  | 3.428305703  |
| H285 | 8.571629980   | 5.643934901  | -2.601170146 |
| H286 | 9.122035209   | 3.960596842  | -2.698816944 |
| H287 | 10.481622260  | 1.771715981  | 0.987508564  |
| H288 | 10.728361642  | 5.331809659  | -3.788027187 |
| H289 | 9.911896134   | 4.593255090  | -5.001300127 |
| H290 | 0.779543358   | 4.524096178  | 5.546100967  |

|       |               |               |              |
|-------|---------------|---------------|--------------|
| H291  | -1.258906520  | 5.317834039   | 7.663297364  |
| H292  | -0.621409918  | 8.561854616   | 4.964879602  |
| H293  | -0.990275517  | 4.299221011   | 5.359035890  |
| H294  | -0.479916662  | 6.695735461   | 8.075840802  |
| H295  | 4.235965725   | 7.593679707   | 1.605948167  |
| H296  | 0.472283035   | 6.932234186   | 5.925597114  |
| H297  | 5.933319562   | -7.198545470  | 3.640495944  |
| H298  | 8.629643516   | -5.764704517  | 3.348681274  |
| H299  | 4.097966761   | 6.470589505   | -0.359948285 |
| H300  | 1.948635207   | -1.448703641  | 5.274460026  |
| H301  | 2.930205289   | 7.556286011   | -3.557836329 |
| H302  | 2.535302773   | 1.756825674   | -4.009065699 |
| H303  | 1.750804630   | 6.606334981   | -2.651816960 |
| H304  | 3.847340520   | -5.458582844  | 3.801895771  |
| H305  | 3.922808279   | 5.234356870   | -1.926453114 |
| H306  | 4.580875978   | -4.716241939  | 2.372766583  |
| H307  | 6.482953392   | -6.229122742  | 2.254086477  |
| H308  | 6.647247083   | -4.204162269  | 3.797435579  |
| H309  | 5.925501900   | -5.166461797  | 5.097208715  |
| H310  | -0.210083945  | 3.236933981   | -7.610907817 |
| H311  | 7.945088988   | -8.674819897  | 3.127824091  |
| H312  | 9.711733860   | -9.249971677  | 0.693669511  |
| H313  | 1.923690694   | 3.250836853   | -2.091507092 |
| H314  | 9.375038183   | -10.794554750 | 3.144051343  |
| H315  | 8.813712033   | -11.093702361 | 1.634265686  |
| H316  | 4.742365684   | -2.606794731  | 3.599235015  |
| H317  | 0.103463941   | 4.869724146   | -2.323357513 |
| H318  | 1.437972010   | 2.076582610   | -6.216062060 |
| H319  | 12.091856071  | -3.857944368  | 0.662569792  |
| H320  | 10.955956496  | -0.936234762  | -0.377213053 |
| H321  | 9.682301695   | -4.091264978  | 1.487623085  |
| H322  | 12.400869069  | -3.554157180  | -0.834390230 |
| H323  | 5.357280408   | 9.398610695   | -0.221866363 |
| H324  | 7.618532170   | -1.961444047  | 2.496277011  |
| H325  | 6.234963003   | -5.277171308  | -1.136600082 |
| H326  | 6.444849553   | 4.873932346   | -2.387296163 |
| H327  | 8.384398954   | -4.830245902  | -1.935035966 |
| H328  | 9.274159313   | 1.380552935   | -4.300882380 |
| H329  | 7.049482858   | 0.788550865   | -3.241500064 |
| H330  | 10.942773727  | -9.556994787  | 1.924146792  |
| H331  | 3.460220485   | -0.992615179  | 4.529518664  |
| H332  | 8.961753871   | -2.872590027  | 4.223799507  |
| H333  | 7.321197578   | -1.030813561  | 3.705070968  |
| H334  | 9.209006371   | -4.961695199  | 5.302781636  |
| H335  | 1.976060260   | -4.813789357  | 4.416604620  |
| H336  | 9.373264581   | -1.994724293  | -2.550689617 |
| H337  | 9.878391034   | -2.925517469  | -1.132800040 |
| H338  | 7.824380898   | -3.797025487  | -3.258270971 |
| H339  | 4.690846765   | 3.370048611   | -3.154119550 |
| H340  | -1.007648418  | 5.213492751   | -4.549641975 |
| H341  | -1.276035157  | 4.501794271   | -6.939172451 |
| H342  | 5.230109720   | -4.0016660845 | -0.422074680 |
| H343  | 10.107639627  | -3.710148447  | 3.589163630  |
| H344  | 10.574839569  | -5.225624887  | 2.041681334  |
| H345  | 1.216065514   | -3.583503182  | 5.278741346  |
| H346  | 11.235259232  | 1.045568373   | -2.685278101 |
| H347  | 9.539554132   | -0.563700316  | 0.598433809  |
| H348  | 5.218719332   | 3.702519702   | -4.831594458 |
| H349  | 2.786712305   | 8.530127699   | 1.175060976  |
| H350  | 3.327745546   | -1.699507688  | 7.857496575  |
| H351  | 3.791629829   | -0.125324653  | 7.169287479  |
| H352  | 12.756353095  | 2.121771274   | 0.511933585  |
| H353  | 12.933016501  | 0.663402208   | -0.207609703 |
| H354  | 12.952693221  | -2.470346392  | 3.173177291  |
| H355  | 12.143618269  | -1.514632673  | 1.268045399  |
| H356  | 14.046171056  | 0.028033104   | 3.512802952  |
| H357  | 11.570494054  | -1.735716034  | 4.010504669  |
| H358  | 5.747293111   | 0.120793401   | 9.050839446  |
| H359  | -11.932009374 | 5.009064012   | 5.159513176  |
| H360  | 8.930141197   | -6.868369581  | 7.615669711  |
| H361  | 7.430138421   | -4.545833733  | 7.620503564  |
| H362  | -11.594462873 | 5.941232544   | 2.286159742  |
| H363  | -10.756604717 | 3.091563338   | 3.115464547  |
| H364  | -12.097699014 | 3.498590176   | 2.028824686  |
| H365  | -7.933623950  | 4.244499214   | -2.861038640 |
| H366  | 2.102585396   | -0.653024049  | 2.156122670  |
| H367  | 0.710827304   | -0.130963328  | -0.982704397 |
| Mo368 | 6.277038858   | -0.429760889  | -0.218630880 |
| N369  | 1.914634352   | -0.306755888  | 1.203256761  |
| N370  | 0.222999852   | -5.733365729  | -8.518310183 |
| N371  | -3.361638552  | -5.966366762  | -7.484499020 |
| N372  | -3.829100961  | -8.021400114  | -5.630596716 |

|      |               |               |              |
|------|---------------|---------------|--------------|
| N373 | -1.570245874  | -8.008033674  | -3.953615576 |
| N374 | -2.050887834  | -5.584201867  | -2.565597086 |
| N375 | -4.446305856  | -6.289377257  | -1.110949615 |
| N376 | -3.790526515  | -8.663546675  | 0.429287095  |
| N377 | -1.217989962  | -8.148301931  | 1.521268355  |
| N378 | -0.811414066  | -5.409902966  | 2.230774460  |
| N379 | -3.151329731  | -4.000914746  | 3.552010344  |
| N380 | -4.351690527  | -6.306500528  | 4.780147177  |
| N381 | 8.961748934   | -10.352112922 | 2.320407838  |
| N382 | 8.470170989   | -7.800867755  | 3.020171821  |
| N383 | 4.152475999   | -3.378242630  | 3.918946698  |
| N384 | 2.113299883   | -3.948387603  | 4.956800418  |
| N385 | 2.743861058   | -1.723955074  | 4.704394803  |
| N386 | 8.894467851   | -5.798993671  | 5.841939941  |
| N387 | -0.651895682  | -0.851922314  | -7.140165838 |
| N388 | 3.695929611   | -1.640403630  | -5.421727195 |
| N389 | -2.731337235  | 0.086614920   | -5.848564492 |
| N390 | -5.383894874  | -0.490832237  | -6.494603244 |
| N391 | -6.012330771  | -2.623527393  | -4.772737157 |
| N392 | -5.972782410  | -1.481196295  | -2.200241822 |
| N393 | -3.186039308  | 1.685685332   | -1.894908841 |
| N394 | -1.693184832  | 0.037369394   | -1.993126393 |
| N395 | -8.307350333  | -0.309504356  | -1.319886327 |
| N396 | -11.991597570 | 1.917709298   | -3.324637742 |
| N397 | -13.569959623 | 2.125838581   | -1.778106351 |
| N398 | 3.468709114   | 1.324357165   | 9.427096888  |
| N399 | -0.403926827  | 5.857281685   | 7.493306177  |
| N400 | -1.554676852  | 8.179034118   | 5.091721069  |
| N401 | -2.696354727  | 7.657005036   | 2.620352390  |
| N402 | -4.363836246  | 6.748392967   | -2.093806550 |
| N403 | -5.141137993  | 8.953798476   | -2.255481046 |
| N404 | -6.635959647  | 7.206132655   | -1.991036752 |
| N405 | -3.247490430  | 4.830923256   | 2.532503761  |
| N406 | -5.087858933  | 4.629412777   | 4.621230479  |
| N407 | -7.352098890  | 6.175426469   | 4.404570999  |
| N408 | -6.619331049  | 8.392198468   | 1.192511215  |
| N409 | -9.975786791  | 5.622905123   | 3.596576137  |
| N410 | 9.822745724   | 5.296076466   | -4.261444082 |
| N411 | 6.400215714   | 4.564726751   | -3.361555552 |
| N412 | 3.699056912   | 5.803467134   | -2.760680952 |
| N413 | 3.688358188   | 7.409195735   | -0.385225050 |
| N414 | 4.934045652   | 5.176241623   | -7.816869466 |
| N415 | 2.104878331   | 4.875326082   | -7.402110299 |
| N416 | 12.260156023  | 1.419339127   | -0.044790812 |
| N417 | 8.221187574   | 0.338390172   | -1.484452792 |
| N418 | 9.171970837   | 1.089084815   | -3.332284601 |
| N419 | 12.074557920  | -0.927722292  | 2.103806760  |
| N420 | -1.865713518  | 1.676926631   | 0.856176599  |
| N421 | -0.769464382  | 1.519580631   | 0.875372481  |
| O422 | -1.487356265  | -5.873109734  | -6.191633151 |
| O423 | -4.658662208  | -6.509871193  | -4.138003558 |
| O424 | -2.754593338  | -9.206731465  | -2.408513581 |
| O425 | -0.936391378  | -6.490751832  | -0.805605072 |
| O426 | -3.706838357  | -4.850441333  | 0.485857827  |
| O427 | -5.029031362  | -7.690330275  | 2.085099303  |
| O428 | -1.671992062  | -9.639581472  | 3.209864360  |
| O429 | 1.074472484   | -6.029732093  | 3.394638011  |
| O430 | -1.415656761  | -3.570047959  | 4.981545918  |
| O431 | -4.389781304  | -5.062144981  | 6.676281501  |
| O432 | -3.839519996  | -8.353300025  | 7.671862846  |
| O433 | 10.473990116  | -7.033032555  | 2.161675145  |
| O434 | 7.763445509   | -7.800547816  | 5.795547988  |
| O435 | 8.749008948   | -4.456454257  | 9.173268264  |
| O436 | -3.136310635  | -1.873997102  | -4.714264948 |
| O437 | 2.142694320   | -0.653449206  | -6.754750840 |
| O438 | -6.071309897  | 0.511840663   | -4.564689389 |
| O439 | -4.676364376  | 3.160335900   | -5.234221981 |
| O440 | -8.183150887  | -2.600178522  | -5.522956226 |
| O441 | -6.486102993  | -3.491283266  | -1.245237533 |
| O442 | -7.606112655  | -0.466437209  | 0.843802757  |
| O443 | -11.115812572 | -0.635633482  | 0.807238253  |
| O444 | 5.346784738   | -1.542699893  | 10.162059882 |
| O445 | -2.314294646  | 0.521990856   | 6.664905797  |
| O446 | -2.794726724  | 6.409858226   | 5.822880708  |
| O447 | -4.412138835  | 9.137723510   | 3.004162135  |
| O448 | -4.974633309  | 5.407662137   | 1.147987362  |
| O449 | -6.011764193  | 2.793492907   | 3.599305118  |
| O450 | -2.802369756  | 2.839067521   | 4.961963763  |
| O451 | -7.895479434  | 5.828867795   | 6.606019221  |
| O452 | -10.628448635 | 7.767990572   | 4.012074118  |
| O453 | -8.674389426  | 7.398345083   | 1.335653880  |
| O454 | -13.521160704 | 5.171105703   | 3.887477011  |

|                                                       |      |              |                                |              |
|-------------------------------------------------------|------|--------------|--------------------------------|--------------|
|                                                       | O455 | -7.439615824 | 4.255644054                    | -2.018288277 |
|                                                       | O456 | 7.621440531  | 3.882870564                    | -5.182455425 |
|                                                       | O457 | 3.788603397  | 5.795845319                    | -5.050754251 |
|                                                       | O458 | 2.426507860  | 8.970119753                    | -1.454747971 |
|                                                       | O459 | 4.633404548  | 10.394643031                   | 1.406325159  |
|                                                       | O460 | 2.099018833  | 3.929165805                    | -9.477546156 |
|                                                       | O461 | 5.877089865  | -0.122196885                   | -6.970643200 |
|                                                       | O462 | 6.808297169  | 1.384630315                    | -5.613317589 |
|                                                       | O463 | -0.661580391 | 6.972241096                    | -6.517858492 |
|                                                       | O464 | 11.487008581 | 1.000944805                    | 3.137653939  |
|                                                       | O465 | 13.586549515 | -0.721399399                   | 5.354634125  |
|                                                       | O466 | 4.888787799  | -2.975446256                   | -3.068331757 |
|                                                       | O467 | 4.375148772  | -5.162175535                   | -2.932855600 |
|                                                       | O468 | 11.825149473 | -3.709023405                   | -2.468449298 |
|                                                       | O469 | 10.380515955 | -4.038444991                   | -4.175863130 |
|                                                       | O470 | 7.639967194  | -1.917235549                   | 0.654870662  |
|                                                       | O471 | 8.132234644  | -4.111485089                   | 0.707669959  |
|                                                       | O472 | 6.584522939  | -1.973359042                   | -1.707749583 |
|                                                       | O473 | 9.719235788  | -3.458572764                   | 4.471601060  |
|                                                       | O474 | 7.513832147  | -1.961514546                   | 3.482283078  |
|                                                       | O475 | -4.896267297 | 3.983833489                    | -2.630168515 |
|                                                       | O476 | 12.810477415 | -3.518865595                   | 0.083164639  |
|                                                       | O477 | 10.549935843 | -4.239545637                   | 1.949478521  |
|                                                       | S478 | -0.039170084 | 5.420136853                    | 3.426753700  |
|                                                       | S479 | 1.291757883  | 3.850466251                    | 0.484936742  |
|                                                       | S480 | 4.814236961  | 0.653608731                    | -1.696689633 |
|                                                       | S481 | 1.242229956  | 1.692993179                    | 3.345662733  |
|                                                       | S482 | 1.675442456  | 0.787703970                    | -1.234924396 |
|                                                       | S483 | 5.159991204  | 4.256448194                    | -0.247257921 |
|                                                       | S484 | 4.628687435  | -1.550194584                   | 1.084498904  |
|                                                       | S485 | 3.712603417  | 4.300938274                    | 3.224800430  |
|                                                       | S486 | 6.948183909  | 1.306841785                    | 1.240674313  |
|                                                       | S487 | 4.838484528  | 0.704502454                    | 4.159386369  |
|                                                       | end  |              |                                |              |
| <b>Fe2-brNH2-Fe6<br/>2N2 associated<br/>35, S=1/2</b> |      |              | <b>bm6026nh22n2x1dtd.car_4</b> |              |
| <b>Fe(139) -2.351</b>                                 | C1   | -2.478964365 | -5.726699413                   | -7.309602796 |
| <b>Fe(140) -0.217</b>                                 | C2   | -1.692939551 | -5.825407949                   | -8.621068510 |
| <b>Fe(141) -2.629</b>                                 | C3   | -4.709507021 | -5.487700468                   | -6.306197535 |
| <b>Fe(142) 2.567</b>                                  | C4   | -4.695151840 | -6.579142240                   | -5.238088898 |
| <b>Fe(143) 2.718</b>                                  | C5   | -4.147830048 | -8.888004532                   | -4.654960795 |
| <b>Fe(144) 2.195</b>                                  | C6   | -3.046506527 | -8.628626152                   | -3.621732219 |
| <b>Fe(145) -1.549</b>                                 | C7   | -0.958558883 | -7.467554346                   | -3.109038848 |
|                                                       | C8   | -1.470462770 | -6.436173832                   | -2.101838843 |
|                                                       | C9   | -2.927842611 | -4.515943805                   | -1.696126450 |
|                                                       | C10  | -3.824997844 | -5.148227670                   | -0.622037076 |
|                                                       | C11  | -5.570471932 | -6.737619689                   | -0.082272685 |
|                                                       | C12  | -4.881071900 | -7.656547588                   | 0.936354076  |
|                                                       | C13  | -3.381195993 | -9.556032802                   | 1.275979197  |
|                                                       | C14  | -2.122052422 | -9.110440405                   | 2.028505248  |
|                                                       | C15  | -0.043898952 | -7.804819852                   | 1.897536403  |
|                                                       | C16  | 0.116997094  | -6.407583483                   | 2.485913326  |
|                                                       | C17  | -0.824209449 | -4.106981691                   | 2.647269273  |
|                                                       | C18  | -1.752413940 | -3.924702272                   | 3.864737784  |
|                                                       | C19  | -1.109334531 | -3.113101303                   | 1.500272989  |
|                                                       | C20  | -1.214736332 | -1.681908422                   | 2.033794743  |
|                                                       | C21  | -0.041229397 | -3.247490601                   | 0.408941802  |
|                                                       | C22  | -4.080042053 | -3.848007824                   | 4.676439401  |
|                                                       | C23  | -4.204997397 | -5.132821813                   | 5.512887247  |
|                                                       | C24  | -5.435601098 | -3.366448303                   | 4.106158852  |
|                                                       | C25  | -6.522339722 | -3.335674880                   | 5.190036981  |
|                                                       | C26  | -5.287456441 | -1.983556772                   | 3.462093600  |
|                                                       | C27  | -4.457458049 | -7.544126090                   | 5.553361611  |
|                                                       | C28  | -3.452079220 | -7.715917934                   | 6.671810489  |
|                                                       | C29  | 9.670288222  | -9.599885828                   | 1.172114621  |
|                                                       | C30  | 9.486900190  | -8.209332939                   | 1.781637911  |
|                                                       | C31  | 7.950876256  | -6.864234274                   | 3.223937559  |
|                                                       | C32  | 8.215649533  | -7.091067104                   | 4.725434135  |
|                                                       | C33  | 6.468224493  | -6.553490001                   | 2.947941709  |
|                                                       | C34  | 5.979075603  | -5.277544759                   | 3.639407358  |
|                                                       | C35  | 4.545254596  | -4.919295214                   | 3.235969957  |
|                                                       | C36  | 3.064660714  | -3.188278271                   | 4.328666782  |
|                                                       | C37  | 9.320121804  | -6.222930991                   | 6.731458676  |
|                                                       | C38  | 8.604669447  | -5.233370578                   | 7.623569595  |
|                                                       | C39  | -1.317602614 | -1.472563597                   | -5.931006173 |
|                                                       | C40  | -2.670176947 | -1.001364420                   | -5.363268348 |
|                                                       | C41  | -0.231673664 | -1.340034096                   | -4.844163809 |
|                                                       | C42  | 1.073488152  | -2.110952078                   | -5.129736997 |
|                                                       | C43  | 2.134667716  | -1.356444733                   | -5.930195896 |
|                                                       | C44  | -3.982944653 | 1.090965636                    | -5.066308819 |
|                                                       | C45  | -5.411313773 | 0.549675013                    | -5.176316240 |
|                                                       | C46  | -3.855172020 | 2.515986439                    | -5.624613298 |

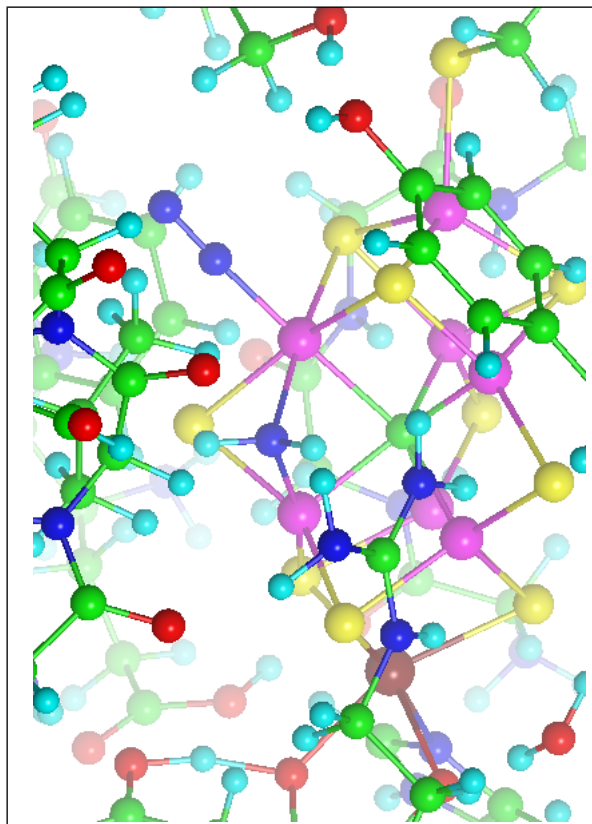

|      |               |              |              |
|------|---------------|--------------|--------------|
| C47  | -6.969649722  | -0.869404641 | -6.417258542 |
| C48  | -7.319740235  | -1.886217955 | -5.323823490 |
| C49  | -6.546978192  | -3.228237875 | -3.427485356 |
| C50  | -6.438243662  | -2.597138224 | -2.037294476 |
| C51  | -6.015727123  | -0.610375473 | -0.667218167 |
| C52  | -7.394972414  | -0.334119084 | -0.046192068 |
| C53  | -5.300137592  | 0.743949874  | -0.780120088 |
| C54  | -3.899440974  | 0.652156590  | -1.286283970 |
| C55  | -3.018638756  | -0.397375367 | -1.458365940 |
| C56  | -1.969424660  | 1.346574189  | -2.142755220 |
| C57  | -9.668723701  | 0.439263900  | -0.531527932 |
| C58  | -10.287700919 | -0.572856624 | 0.430114874  |
| C59  | -10.541139092 | 0.582069430  | -1.802243140 |
| C60  | -11.757806256 | 1.453669924  | -1.689160687 |
| C61  | -12.699898722 | 1.571798409  | -0.685889358 |
| C62  | -13.181783378 | 2.940384088  | -2.360913664 |
| C63  | 3.963178669   | -0.384514835 | 9.145246418  |
| C64  | 5.400519382   | -0.847241215 | 9.284332591  |
| C65  | 3.474950455   | -0.828252864 | 7.742728542  |
| C66  | 2.021921593   | -0.501189126 | 7.494118330  |
| C67  | 1.005528121   | -1.427259066 | 7.797299718  |
| C68  | 1.638975804   | 0.737306572  | 6.948248186  |
| C69  | -0.340699368  | -1.139833985 | 7.549140345  |
| C70  | 0.298960755   | 1.046433387  | 6.712771151  |
| C71  | -0.690679345  | 0.102520195  | 7.003887164  |
| C72  | 0.039729919   | 6.150893696  | 6.181935211  |
| C73  | -1.268721816  | 6.884706758  | 5.839149489  |
| C74  | 0.196769928   | 4.908566073  | 5.305236570  |
| C75  | -2.272152689  | 8.960489211  | 4.955430915  |
| C76  | -2.988026296  | 8.620751466  | 3.643863081  |
| C77  | -2.962801237  | 7.104138161  | 1.663304314  |
| C78  | -3.666978393  | 5.752120333  | 1.947108275  |
| C79  | -1.805872252  | 6.968818021  | 0.647265235  |
| C80  | -2.073089695  | 6.332866039  | -0.720145869 |
| C81  | -2.830561731  | 7.192666343  | -1.745384729 |
| C82  | -5.244826276  | 7.821821022  | -1.760761088 |
| C83  | -3.619251204  | 3.562780146  | 3.042044375  |
| C84  | -4.836029187  | 3.658479533  | 3.973061853  |
| C85  | -2.619917481  | 2.570227214  | 3.670120491  |
| C86  | -5.640642366  | 4.636708170  | 6.070156950  |
| C87  | -6.774841532  | 5.650172734  | 6.038578330  |
| C88  | -7.877106727  | 7.418308456  | 4.778501746  |
| C89  | -9.361295231  | 7.087915381  | 4.488899108  |
| C90  | -7.380353831  | 8.529695585  | 3.849892387  |
| C91  | -7.431063407  | 8.168131213  | 2.370509968  |
| C92  | -10.966493859 | 5.448496728  | 3.622093937  |
| C93  | -11.991487324 | 5.397031834  | 4.744555736  |
| C94  | -10.887074991 | 4.063279096  | 2.916151166  |
| C95  | -9.982570747  | 4.089060440  | 1.704880173  |
| C96  | -10.483358174 | 4.469146042  | 0.450059757  |
| C97  | -8.612510362  | 3.794961308  | 1.807695727  |
| C98  | -9.645097934  | 4.574955326  | -0.662176627 |
| C99  | -7.752800260  | 3.921852118  | 0.712984246  |
| C100 | -8.279913844  | 4.323534436  | -0.512583624 |
| C101 | 8.792558449   | 4.687244722  | -3.624999347 |
| C102 | 7.491448543   | 4.278800011  | -4.295749262 |
| C103 | 5.035339682   | 4.067491270  | -3.972999863 |
| C104 | 4.097665823   | 5.281536985  | -4.019698425 |
| C105 | 2.869195310   | 6.907074602  | -2.640924673 |
| C106 | 3.146222308   | 7.810991826  | -1.444025902 |
| C107 | 4.065561489   | 8.131052212  | 0.784197072  |
| C108 | 4.909167006   | 9.372223119  | 0.571711299  |
| C109 | 3.981307528   | 4.055028700  | -8.427017977 |
| C110 | 2.485028238   | 4.379230636  | -8.500685427 |
| C111 | 4.197702222   | 2.708943387  | -7.698480430 |
| C112 | 5.621017817   | 2.169842666  | -7.942925254 |
| C113 | 5.923579550   | 1.014544100  | -7.017927485 |
| C114 | 0.531986175   | 5.346934919  | -7.399739121 |
| C115 | 0.339197148   | 6.725420951  | -6.801406577 |
| C116 | -0.418857191  | 4.262008186  | -6.836955512 |
| C117 | 0.045301984   | 3.826045796  | -5.478318814 |
| C118 | -0.307268608  | 4.560057399  | -4.335731594 |
| C119 | 0.990567997   | 2.792263367  | -5.361970126 |
| C120 | 0.330159172   | 4.314127464  | -3.116954721 |
| C121 | 1.622577555   | 2.548153864  | -4.143537011 |
| C122 | 1.318968359   | 3.333414000  | -3.027520033 |
| C123 | 11.127941238  | 0.597058270  | 0.259932267  |
| C124 | 11.620911499  | -0.021491339 | 1.576270506  |
| C125 | 10.206485210  | -0.372191579 | -0.497025857 |
| C126 | 9.487759019   | 0.186351246  | -1.683860166 |
| C127 | 10.048273096  | 0.663146366  | -2.851158003 |
| C128 | 7.851702419   | 0.560002597  | -3.089406578 |



|       |              |               |              |
|-------|--------------|---------------|--------------|
| C129  | 12.531661483 | -1.909812942  | 2.787927579  |
| C130  | 13.553036437 | -1.071117744  | 3.521752412  |
| C131  | 4.724747358  | -4.306460552  | -2.772908218 |
| C132  | 5.659160003  | -4.363044872  | -1.566154459 |
| C133  | 6.865193358  | -3.379899409  | -1.638728329 |
| C134  | 7.923818377  | -3.915534070  | -2.639860480 |
| C135  | 9.276612406  | -3.199909795  | -2.621411056 |
| C136  | 10.362573816 | -3.863565621  | -3.499813700 |
| C137  | 7.525012670  | -3.281825965  | -0.255341308 |
| C138  | 3.759687414  | 1.583730373   | 1.053676591  |
| Fe139 | 5.322965442  | 1.950736931   | -0.145564245 |
| Fe140 | 1.602834469  | 1.539360009   | 0.896631504  |
| Fe141 | 3.628574935  | 1.938490357   | 3.021034727  |
| Fe142 | 3.687327221  | 3.534750559   | 0.985939107  |
| Fe143 | 1.747645167  | 3.739654689   | 2.809936869  |
| Fe144 | 5.139380105  | 0.298235635   | 1.797512687  |
| Fe145 | 3.489666998  | 0.005962868   | -0.132966812 |
| H146  | 0.157869139  | -6.142893119  | -7.826163497 |
| H147  | -0.116317370 | -4.585728653  | -8.230187216 |
| H148  | -4.235158721 | -5.656163621  | -8.379425997 |
| H149  | -2.156085872 | -5.157304737  | -9.365189224 |
| H150  | -1.841033644 | -6.850406226  | -9.003130892 |
| H151  | -4.429698311 | -4.551814018  | -5.799129360 |
| H152  | -4.039103281 | -7.964474415  | -6.596907801 |
| H153  | -5.738748400 | -5.378160855  | -6.672721084 |
| H154  | -3.913658555 | -9.813424455  | -5.196419832 |
| H155  | -2.012656056 | -7.450047418  | -4.964616038 |
| H156  | -5.080040613 | -9.042780733  | -4.096266497 |
| H157  | -2.163791858 | -3.927054522  | -1.176140277 |
| H158  | -2.519543580 | -5.459865895  | -3.578568867 |
| H159  | -0.120663564 | -7.041533352  | -3.678008447 |
| H160  | -6.088666818 | -5.956952608  | 0.489349030  |
| H161  | -4.731505620 | -6.352275268  | -2.032284934 |
| H162  | -0.585784869 | -8.320921495  | -2.528904300 |
| H163  | -3.520955243 | -3.828844322  | -2.314240239 |
| H164  | -3.848726420 | -8.610169647  | -0.589356607 |
| H165  | -6.315105563 | -7.324224524  | -0.637913678 |
| H166  | -0.056831064 | -4.245097549  | -0.053099883 |
| H167  | -0.202624298 | -2.500479848  | -0.384002185 |
| H168  | 0.969499032  | -3.092418469  | 0.819347233  |
| H169  | -2.082404932 | -3.384493061  | 1.060052330  |
| H170  | -3.101830297 | -10.421138657 | 0.657398744  |
| H171  | -4.539560744 | -1.977351654  | 2.657094191  |
| H172  | -4.338045714 | -6.332157508  | 3.810117035  |
| H173  | -6.700805659 | -4.326192545  | 5.634846053  |
| H174  | -1.428964158 | -0.995619667  | 1.205415871  |
| H175  | -0.280925536 | -1.351811177  | 2.512926109  |
| H176  | 3.361729224  | -0.925958401  | 9.900727036  |
| H177  | -6.240593281 | -1.651895229  | 3.026860106  |
| H178  | -7.469642074 | -2.983688974  | 4.753616744  |
| H179  | -4.979301072 | -1.241303632  | 4.216541030  |
| H180  | -6.243258520 | -2.645861681  | 6.003535316  |
| H181  | -5.752279221 | -4.087589468  | 3.330029168  |
| H182  | -3.700944009 | -3.092171502  | 5.379997538  |
| H183  | -3.410523316 | -4.163456558  | 2.657258945  |
| H184  | -2.024405833 | -1.570054529  | 2.769034658  |
| H185  | -1.656461339 | 2.644766193   | 3.140887839  |
| H186  | -3.029788927 | 1.561763800   | 3.510629540  |
| H187  | -2.361698101 | 1.963974665   | 5.527618946  |
| H188  | -2.587567812 | -0.301126982  | 6.934546872  |
| H189  | 0.016645457  | 1.999947563   | 6.266189716  |
| H190  | 2.404622086  | 1.461315942   | 6.663742351  |
| H191  | 1.269662631  | -2.400570463  | 8.219933297  |
| H192  | -1.609795658 | -5.794256362  | 1.593136214  |
| H193  | 0.690513100  | -7.888454318  | 1.080867835  |
| H194  | 0.242480673  | -8.513575028  | 2.684475272  |
| H195  | -1.598939580 | -7.857064545  | 0.461586440  |
| H196  | -4.095750471 | -9.893102690  | 2.037193701  |
| H197  | -1.111901766 | -1.885977286  | 7.759038627  |
| H198  | 0.187049264  | -3.918995903  | 3.027684242  |
| H199  | -5.474224961 | -7.640516492  | 5.969160827  |
| H200  | -4.302903539 | -8.372491969  | 4.843851848  |
| H201  | -2.464776442 | -7.230014064  | 6.503396624  |
| H202  | 10.407394593 | -6.113008706  | 6.861599528  |
| H203  | 4.161130678  | -1.168790155  | -6.139618115 |
| H204  | 5.328450878  | -2.464182324  | -2.792639416 |
| H205  | 5.701026397  | 1.811884091   | -8.978842485 |
| H206  | 6.357300716  | 2.973577681   | -7.796152556 |
| H207  | 3.467921186  | 1.961025421   | -8.047940704 |
| H208  | 1.236205833  | 7.385658724   | -6.861286574 |
| H209  | 4.262985047  | 3.903179078   | -9.481447529 |
| H210  | -0.012590661 | -0.272665345  | -4.686938490 |

|      |               |              |              |
|------|---------------|--------------|--------------|
| H211 | 0.853527167   | -3.037966306 | -5.688766375 |
| H212 | 2.513266644   | 5.194480202  | -6.589805760 |
| H213 | 0.260177395   | 5.489032363  | -8.466261775 |
| H214 | 4.639022132   | 5.328437862  | -6.922582228 |
| H215 | 3.676234816   | -2.233560043 | -4.825851593 |
| H216 | 4.008683070   | 2.847940867  | -6.622428459 |
| H217 | 5.748234985   | 5.049425683  | -8.107068470 |
| H218 | -1.312889731  | -1.149420038 | -7.971844185 |
| H219 | -0.655194642  | -1.697197374 | -3.895528994 |
| H220 | 6.828114625   | 2.291611758  | -5.827087511 |
| H221 | 1.514335681   | -2.435925268 | -4.176138652 |
| H222 | -5.487533923  | -1.272287392 | 0.032886431  |
| H223 | -3.189105345  | -1.447619653 | -1.238262962 |
| H224 | -7.571234461  | -3.613664326 | -3.523147822 |
| H225 | -5.331992021  | -2.029997632 | -4.718335152 |
| H226 | -8.161658514  | -0.137377504 | -1.940527032 |
| H227 | -12.796839391 | 1.096954978  | 0.283920923  |
| H228 | -10.018607347 | -1.632679451 | 0.198864014  |
| H229 | -10.804756536 | -0.424460807 | -2.172217649 |
| H230 | -9.585571451  | 1.409866304  | -0.016838835 |
| H231 | -13.715602667 | 3.692148550  | -2.937630763 |
| H232 | -5.321344943  | 1.204855242  | 0.221285658  |
| H233 | -5.889822845  | 1.398721516  | -1.442563412 |
| H234 | -14.410540976 | 2.855055476  | -0.622454184 |
| H235 | -9.909255413  | 1.039682695  | -2.579643339 |
| H236 | -5.957692283  | -0.730419367 | -2.813125807 |
| H237 | -5.876344535  | -4.100527777 | -3.452644332 |
| H238 | -7.787445106  | -0.136156984 | -6.420727816 |
| H239 | -1.212050250  | 2.030580698  | -2.518931991 |
| H240 | -6.979913499  | -1.384407425 | -7.387170204 |
| H241 | 4.032161379   | 1.334713137  | 10.260713600 |
| H242 | 2.996535041   | 1.413736238  | 8.998590913  |
| H243 | -2.024302526  | 5.013184201  | 3.014234477  |
| H244 | -3.981224892  | 3.120382148  | 2.102498469  |
| H245 | -3.878323520  | 5.138791207  | 5.021008089  |
| H246 | -3.608931426  | 2.711011087  | -1.788006130 |
| H247 | -4.870056312  | 3.873617830  | -3.282299243 |
| H248 | -4.823284608  | 4.211757608  | -5.490263971 |
| H249 | -5.807716754  | 4.025410234  | -2.013826222 |
| H250 | -2.818298704  | 2.853515628  | -5.459011751 |
| H251 | -4.059235563  | 2.508104448  | -6.707812702 |
| H252 | -6.372257807  | 8.842954399  | 4.155866409  |
| H253 | -8.054698899  | 9.388436885  | 3.992371346  |
| H254 | -5.482766708  | 8.822422611  | 2.126043407  |
| H255 | -6.302565810  | 8.183742092  | 0.702798950  |
| H256 | -5.730300439  | 9.818716135  | -1.684329217 |
| H257 | -2.432445170  | 7.008203386  | -2.755412424 |
| H258 | -10.055373446 | 4.862284106  | -1.633642071 |
| H259 | -8.185120317  | 3.451315641  | 2.753317749  |
| H260 | -6.738425874  | 6.428242402  | -1.487167488 |
| H261 | -1.014954822  | 6.373526661  | 1.131207544  |
| H262 | -1.517565065  | 7.274728770  | 3.221081821  |
| H263 | -2.561719431  | 5.351393128  | -0.618064479 |
| H264 | -4.929629399  | -0.410778416 | -6.913173330 |
| H265 | -1.949011974  | 10.008043175 | 4.902560918  |
| H266 | -2.270400720  | 0.664920382  | -6.367225969 |
| H267 | -1.382315974  | 7.976201969  | 0.499600597  |
| H268 | -6.683648296  | 3.743446368  | 0.827315118  |
| H269 | -3.029740752  | 8.881546375  | 5.747575384  |
| H270 | -4.079480726  | 9.490564252  | -2.111171916 |
| H271 | -7.274808961  | 8.020732277  | -1.913125795 |
| H272 | 0.055570323   | -0.595186819 | -7.187978392 |
| H273 | -1.452679404  | -2.549070830 | -6.145265116 |
| H274 | -11.548273894 | 4.680105388  | 0.331158408  |
| H275 | -3.775216223  | 1.111636712  | -3.986417868 |
| H276 | -3.740918347  | 7.779483345  | 1.296831714  |
| H277 | -2.662797265  | 8.254937526  | -1.523672419 |
| H278 | -1.082839826  | 6.134593998  | -1.151271586 |
| H279 | -4.537774378  | 5.918575496  | -1.914934666 |
| H280 | -6.090423827  | 3.638263419  | 6.182680665  |
| H281 | -6.304087857  | 6.107983379  | 4.101099118  |
| H282 | -7.904527394  | 7.841382492  | 5.794650959  |
| H283 | -5.049383652  | 4.844673566  | 6.972707213  |
| H284 | -8.859642647  | 5.211037472  | 3.905912507  |
| H285 | 8.607738397   | 5.519066325  | -2.928477151 |
| H286 | 9.095964164   | 3.816510575  | -3.006660092 |
| H287 | 10.549399340  | 1.483522438  | 0.558704314  |
| H288 | 10.708994449  | 5.090897524  | -4.184518674 |
| H289 | 9.816460482   | 4.370597762  | -5.353367853 |
| H290 | 1.133404805   | 4.415228160  | 5.596656501  |
| H291 | -0.784011061  | 5.208701263  | 7.793763778  |
| H292 | -0.195653932  | 8.496614249  | 5.140214947  |

|  |       |               |               |              |
|--|-------|---------------|---------------|--------------|
|  | H293  | -0.644370915  | 4.221227628   | 5.470238309  |
|  | H294  | 0.038538389   | 6.565774757   | 8.194348602  |
|  | H295  | 4.581108051   | 7.505713222   | 1.530960964  |
|  | H296  | 0.894231845   | 6.822417639   | 6.005338703  |
|  | H297  | 5.860448863   | -7.418278319  | 3.263507449  |
|  | H298  | 8.567286591   | -6.034291081  | 2.855940277  |
|  | H299  | 4.281698466   | 6.385353228   | -0.420736253 |
|  | H300  | 2.106167365   | -1.579212237  | 5.155488070  |
|  | H301  | 2.945084023   | 7.521658796   | -3.545903378 |
|  | H302  | 2.345596797   | 1.736152796   | -4.043603477 |
|  | H303  | 1.814983254   | 6.591024771   | -2.558367671 |
|  | H304  | 3.835242774   | -5.649920502  | 3.639676937  |
|  | H305  | 3.975490711   | 5.158185924   | -1.993569975 |
|  | H306  | 4.447776138   | -4.935020508  | 2.137478695  |
|  | H307  | 6.364941982   | -6.452754333  | 1.855560462  |
|  | H308  | 6.640338939   | -4.437955233  | 3.374797034  |
|  | H309  | 6.022469355   | -5.389205497  | 4.735057619  |
|  | H310  | -0.423917691  | 3.419456879   | -7.543013103 |
|  | H311  | 7.813635697   | -8.925981132  | 2.609250894  |
|  | H312  | 9.469373412   | -9.486466937  | 0.096013804  |
|  | H313  | 1.821875973   | 3.143056276   | -2.079483638 |
|  | H314  | 9.198293785   | -11.075443940 | 2.526560145  |
|  | H315  | 8.574344763   | -11.335299598 | 1.035726903  |
|  | H316  | 4.828204278   | -2.832201291  | 3.426210252  |
|  | H317  | 0.065365807   | 4.883661814   | -2.224821227 |
|  | H318  | 1.237958537   | 2.183866822   | -6.234687233 |
|  | H319  | 12.003377868  | -4.181563797  | 0.084673613  |
|  | H320  | 10.807794392  | -1.229022846  | -0.847278878 |
|  | H321  | 9.610774039   | -4.343180816  | 0.983786911  |
|  | H322  | 12.234923655  | -3.833758435  | -1.413083027 |
|  | H323  | 5.578808119   | 9.342015321   | -0.321218373 |
|  | H324  | 7.642235676   | -2.179827934  | 2.117492899  |
|  | H325  | 6.002498041   | -5.394592310  | -1.425845598 |
|  | H326  | 6.474740168   | 4.751283470   | -2.582633431 |
|  | H327  | 8.082588850   | -4.975031430  | -2.385148433 |
|  | H328  | 9.077897516   | 1.190416239   | -4.685068170 |
|  | H329  | 6.882548368   | 0.607153949   | -3.568504330 |
|  | H330  | 10.740642785  | -9.845823206  | 1.270339516  |
|  | H331  | 3.623123513   | -1.178305482  | 4.393615077  |
|  | H332  | 9.043065411   | -3.177226622  | 3.764546661  |
|  | H333  | 9.420537149   | -1.289474474  | 3.371734325  |
|  | H334  | 9.257604125   | -5.283979401  | 4.796300199  |
|  | H335  | 1.951793021   | -4.928520398  | 4.185243079  |
|  | H336  | 9.155184466   | -2.167417617  | -2.982797054 |
|  | H337  | 9.661859987   | -3.136163223  | -1.594921251 |
|  | H338  | 7.491299555   | -3.888940957  | -3.651234996 |
|  | H339  | 4.642854241   | 3.302936750   | -3.284939955 |
|  | H340  | -1.053638901  | 5.353632698   | -4.418083537 |
|  | H341  | -1.428512399  | 4.699630766   | -6.812252458 |
|  | H342  | 5.036696235   | -4.098169478  | -0.694568198 |
|  | H343  | 10.135698459  | -4.037473889  | 3.071077902  |
|  | H344  | 10.471755395  | -5.533652185  | 1.471041497  |
|  | H345  | 1.259491654   | -3.685020833  | 5.110007257  |
|  | H346  | 11.084530117  | 0.824214015   | -3.125167296 |
|  | H347  | 9.467027265   | -0.784057413  | 0.199321298  |
|  | H348  | 5.097933120   | 3.649608374   | -4.979433296 |
|  | H349  | 3.094924203   | 8.427176373   | 1.211492287  |
|  | H350  | 3.633920190   | -1.913913252  | 7.664288881  |
|  | H351  | 4.108125047   | -0.340371311  | 6.984250681  |
|  | H352  | 12.809703953  | 1.732464586   | -0.051161656 |
|  | H353  | 12.867661931  | 0.278641928   | -0.801449619 |
|  | H354  | 13.011695465  | -2.867689931  | 2.534972664  |
|  | H355  | 12.127429903  | -1.863547959  | 0.694652611  |
|  | H356  | 14.179871960  | -0.415522105  | 2.869044643  |
|  | H357  | 11.684586030  | -2.128482178  | 3.457992448  |
|  | H358  | 6.146777074   | -0.192215166  | 8.773734111  |
|  | H359  | -11.565962248 | 5.259351954   | 5.766375101  |
|  | H360  | 9.038175492   | -7.232583165  | 7.079258983  |
|  | H361  | 7.621125503   | -4.871958596  | 7.235915852  |
|  | H362  | -11.305338713 | 6.203493297   | 2.893260273  |
|  | H363  | -10.540456415 | 3.311231425   | 3.642828255  |
|  | H364  | -11.911650404 | 3.790201035   | 2.624389715  |
|  | H365  | -7.917914468  | 4.518858630   | -2.416985863 |
|  | H366  | 2.207795579   | -0.716445216  | 2.006465959  |
|  | H367  | 1.263173142   | -0.997936519  | 0.652428078  |
|  | Mo368 | 6.242694733   | -0.558499797  | -0.526031923 |
|  | N369  | 1.967536344   | -0.390159234  | 1.065992460  |
|  | N370  | -0.269021168  | -5.548465957  | -8.541491362 |
|  | N371  | -3.838558245  | -5.732547011  | -7.446133747 |
|  | N372  | -4.304853125  | -7.817140764  | -5.625810819 |
|  | N373  | -1.983475063  | -7.900481448  | -4.047643819 |
|  | N374  | -2.305242230  | -5.485195832  | -2.584476608 |

|      |               |               |              |
|------|---------------|---------------|--------------|
| N375 | -4.654344214  | -6.134762815  | -1.036253795 |
| N376 | -4.007082992  | -8.562903374  | 0.420437634  |
| N377 | -1.358102594  | -8.169935550  | 1.405401594  |
| N378 | -0.844065931  | -5.500758198  | 2.199381160  |
| N379 | -3.088670141  | -4.002877601  | 3.613555320  |
| N380 | -4.270848651  | -6.303154462  | 4.827661699  |
| N381 | 8.761507883   | -10.609262939 | 1.728685045  |
| N382 | 8.353202337   | -8.061282989  | 2.496427598  |
| N383 | 4.191306958   | -3.577541924  | 3.714027878  |
| N384 | 2.127289414   | -4.073269830  | 4.736053653  |
| N385 | 2.873809814   | -1.877310890  | 4.559402173  |
| N386 | 8.943940485   | -6.122531453  | 5.334808563  |
| N387 | -0.974944334  | -0.686524988  | -7.125107946 |
| N388 | 3.414212386   | -1.622907699  | -5.606676815 |
| N389 | -2.989073023  | 0.267834619   | -5.740323695 |
| N390 | -5.689283558  | -0.203104021  | -6.268525593 |
| N391 | -6.295878784  | -2.356486475  | -4.560815413 |
| N392 | -6.122246007  | -1.273818461  | -1.963002972 |
| N393 | -3.210531201  | 1.765280482   | -1.731097530 |
| N394 | -1.826216593  | 0.038863036   | -1.991329131 |
| N395 | -8.365490057  | -0.043041469  | -0.948627467 |
| N396 | -12.071285257 | 2.313748659   | -2.729837509 |
| N397 | -13.595115764 | 2.522493978   | -1.130548937 |
| N398 | 3.922022148   | 1.075260682   | 9.276816327  |
| N399 | 0.071290665   | 5.737140741   | 7.593616114  |
| N400 | -1.131527122  | 8.128469389   | 5.288451346  |
| N401 | -2.395429508  | 7.681269009   | 2.879296515  |
| N402 | -4.270115319  | 6.915503121   | -1.766120613 |
| N403 | -5.000256870  | 9.140304973   | -1.874461469 |
| N404 | -6.525241518  | 7.426164151   | -1.570265637 |
| N405 | -3.014888355  | 4.864422341   | 2.750008190  |
| N406 | -4.768462476  | 4.646543126   | 4.911823248  |
| N407 | -6.986724584  | 6.274923172   | 4.840639275  |
| N408 | -6.355569223  | 8.576783359   | 1.641341960  |
| N409 | -9.649372791  | 5.810457126   | 4.134280191  |
| N410 | 9.785898312   | 5.089019943   | -4.624026546 |
| N411 | 6.376947885   | 4.455302564   | -3.557694396 |
| N412 | 3.732254175   | 5.749401800   | -2.806462553 |
| N413 | 3.906391722   | 7.339068335   | -0.424477674 |
| N414 | 4.752798377   | 5.202205220   | -7.935280844 |
| N415 | 1.938256570   | 4.992080931   | -7.413369155 |
| N416 | 12.245211137  | 1.064319293   | -0.584865351 |
| N417 | 8.102338539   | 0.139613974   | -1.849372522 |
| N418 | 9.003032281   | 0.892639224   | -3.716310945 |
| N419 | 12.109141308  | -1.290755504  | 1.543032047  |
| N420 | -1.339868466  | 1.559980864   | 0.790019562  |
| N421 | -0.216150684  | 1.518673313   | 0.821276600  |
| O422 | -1.937760869  | -5.696757550  | -6.191503458 |
| O423 | -5.028259896  | -6.315495703  | -4.069470599 |
| O424 | -3.135207907  | -9.089403435  | -2.471577572 |
| O425 | -1.143359803  | -6.482654059  | -0.905321878 |
| O426 | -3.790468069  | -4.763313639  | 0.558893627  |
| O427 | -5.140908353  | -7.591256800  | 2.148963524  |
| O428 | -1.826604151  | -9.637933962  | 3.109537054  |
| O429 | 1.140123248   | -6.175314964  | 3.158247072  |
| O430 | -1.285585353  | -3.716767681  | 4.995683930  |
| O431 | -4.243441510  | -5.104891052  | 6.754402622  |
| O432 | -3.667255315  | -8.400705386  | 7.661584838  |
| O433 | 10.339500829  | -7.323213853  | 1.567325986  |
| O434 | 7.784087684   | -8.107343717  | 5.299620294  |
| O435 | 9.043903246   | -4.860235460  | 8.700150079  |
| O436 | -3.395659341  | -1.716552351  | -4.647049193 |
| O437 | 1.839352888   | -0.563613727  | -6.854650280 |
| O438 | -6.250396496  | 0.782707078   | -4.289186085 |
| O439 | -4.786224750  | 3.394397279   | -4.962497453 |
| O440 | -8.501160880  | -2.240580789  | -5.192006229 |
| O441 | -6.641081574  | -3.294853014  | -1.034808815 |
| O442 | -7.583126403  | -0.286739582  | 1.175302229  |
| O443 | -11.055041906 | -0.290476914  | 1.335788398  |
| O444 | 5.742894142   | -1.859099934  | 9.879241500  |
| O445 | -1.998868367  | 0.445089235   | 6.716962255  |
| O446 | -2.384993871  | 6.385677467   | 6.059475623  |
| O447 | -4.046006362  | 9.212067675   | 3.348852784  |
| O448 | -4.780759309  | 5.517858135   | 1.453769274  |
| O449 | -5.770044332  | 2.850963181   | 3.892282779  |
| O450 | -2.440035345  | 2.824408159   | 5.068100246  |
| O451 | -7.457852388  | 5.868283163   | 7.046997123  |
| O452 | -10.233849781 | 7.955851758   | 4.635249423  |
| O453 | -8.407340914  | 7.594058475   | 1.867991143  |
| O454 | -13.195726378 | 5.460298225   | 4.550386451  |
| O455 | -7.394372891  | 4.504000326   | -1.592037614 |
| O456 | 7.493580805   | 3.777559662   | -5.446827048 |

|                                                        |      |              |                                |              |
|--------------------------------------------------------|------|--------------|--------------------------------|--------------|
|                                                        | O457 | 3.740254048  | 5.797526568                    | -5.099414610 |
|                                                        | O458 | 2.629049648  | 8.940344615                    | -1.410720072 |
|                                                        | O459 | 4.899280967  | 10.326452050                   | 1.333318646  |
|                                                        | O460 | 1.809132144  | 4.079848571                    | -9.499421329 |
|                                                        | O461 | 5.571019288  | -0.139206633                   | -7.235113832 |
|                                                        | O462 | 6.576110182  | 1.318829329                    | -5.876159403 |
|                                                        | O463 | -0.714570515 | 7.135324586                    | -6.336710327 |
|                                                        | O464 | 11.621376858 | 0.628316995                    | 2.640614366  |
|                                                        | O465 | 13.752784899 | -1.143634805                   | 4.726959983  |
|                                                        | O466 | 4.593046009  | -3.098125084                   | -3.322727804 |
|                                                        | O467 | 4.095306555  | -5.286095799                   | -3.172778051 |
|                                                        | O468 | 11.549115702 | -3.917053897                   | -3.017197824 |
|                                                        | O469 | 10.019767834 | -4.275337060                   | -4.643863016 |
|                                                        | O470 | 7.585935796  | -2.091318238                   | 0.280607510  |
|                                                        | O471 | 7.996929888  | -4.296930726                   | 0.291299743  |
|                                                        | O472 | 6.362195404  | -2.095659807                   | -2.019180995 |
|                                                        | O473 | 9.791814069  | -3.790120027                   | 3.973142534  |
|                                                        | O474 | 7.587478222  | -2.214049419                   | 3.107401820  |
|                                                        | O475 | -4.893902874 | 4.177500542                    | -2.338996722 |
|                                                        | O476 | 12.700614454 | -3.848453731                   | -0.523536461 |
|                                                        | O477 | 10.490452485 | -4.545577001                   | 1.400798075  |
|                                                        | S478 | 0.259103897  | 5.314863720                    | 3.499406278  |
|                                                        | S479 | 1.510566213  | 3.867968640                    | 0.546714917  |
|                                                        | S480 | 4.804914423  | 0.679076034                    | -1.911166125 |
|                                                        | S481 | 1.431324178  | 1.596168476                    | 3.286514166  |
|                                                        | S482 | 1.776806321  | 0.747530089                    | -1.304814829 |
|                                                        | S483 | 5.329046704  | 4.156195377                    | -0.373576041 |
|                                                        | S484 | 4.622703914  | -1.670972813                   | 0.810723683  |
|                                                        | S485 | 3.954420822  | 4.151720851                    | 3.139945670  |
|                                                        | S486 | 7.049219832  | 1.078773587                    | 0.992952071  |
|                                                        | S487 | 5.014640085  | 0.504809480                    | 3.986671655  |
|                                                        | end  |              |                                |              |
|                                                        |      |              | <b>bm6026nh22n2x1dtg.car_2</b> |              |
|                                                        | C1   | -2.475784955 | -5.722992627                   | -7.305756327 |
|                                                        | C2   | -1.687005373 | -5.821786050                   | -8.616064728 |
|                                                        | C3   | -4.707622968 | -5.486352810                   | -6.304151224 |
|                                                        | C4   | -4.693309937 | -6.577861618                   | -5.236986890 |
|                                                        | C5   | -4.146284966 | -8.887236855                   | -4.655856429 |
|                                                        | C6   | -3.044782090 | -8.628813787                   | -3.622082969 |
|                                                        | C7   | -0.956353614 | -7.468897495                   | -3.109915532 |
|                                                        | C8   | -1.467817993 | -6.437251325                   | -2.102768737 |
|                                                        | C9   | -2.923688925 | -4.516174117                   | -1.697113375 |
|                                                        | C10  | -3.821420184 | -5.147103924                   | -0.622428195 |
|                                                        | C11  | -5.568127759 | -6.736710277                   | -0.082048739 |
|                                                        | C12  | -4.879068037 | -7.656025473                   | 0.935977511  |
|                                                        | C13  | -3.379502125 | -9.555955719                   | 1.275855065  |
|                                                        | C14  | -2.121115130 | -9.110635274                   | 2.028848789  |
|                                                        | C15  | -0.040736552 | -7.809125705                   | 1.897383528  |
|                                                        | C16  | 0.120516060  | -6.411828916                   | 2.486639688  |
|                                                        | C17  | -0.817503994 | -4.112616056                   | 2.648693638  |
|                                                        | C18  | -1.746864061 | -3.925515597                   | 3.864844597  |
|                                                        | C19  | -1.095954900 | -3.119532833                   | 1.501465053  |
|                                                        | C20  | -1.190417510 | -1.685970795                   | 2.031431221  |
|                                                        | C21  | -0.029823698 | -3.254802916                   | 0.408975553  |
|                                                        | C22  | -4.075837672 | -3.846915900                   | 4.675314725  |
|                                                        | C23  | -4.200168798 | -5.131883848                   | 5.511488118  |
|                                                        | C24  | -5.432448477 | -3.366053755                   | 4.105272482  |
|                                                        | C25  | -6.518543602 | -3.335515858                   | 5.188773213  |
|                                                        | C26  | -5.284551128 | -1.982389906                   | 3.46056817   |
|                                                        | C27  | -4.451758792 | -7.545237539                   | 5.551724388  |
|                                                        | C28  | -3.445428299 | -7.715484832                   | 6.670303379  |
|                                                        | C29  | 9.670914228  | -9.597872609                   | 1.171559536  |
|                                                        | C30  | 9.487473151  | -8.207909519                   | 1.781989959  |
|                                                        | C31  | 7.951087962  | -6.863268001                   | 3.224648865  |
|                                                        | C32  | 8.216596732  | -7.090813692                   | 4.726130277  |
|                                                        | C33  | 6.468772446  | -6.553158331                   | 2.949376511  |
|                                                        | C34  | 5.981168394  | -5.276821998                   | 3.639602591  |
|                                                        | C35  | 4.546047044  | -4.919942905                   | 3.240269851  |
|                                                        | C36  | 3.066210056  | -3.187413472                   | 4.330526774  |
|                                                        | C37  | 9.322220657  | -6.223053369                   | 6.731496418  |
|                                                        | C38  | 8.607028234  | -5.233585191                   | 7.623955617  |
|                                                        | C39  | -1.313234532 | -1.470880733                   | -5.927078562 |
|                                                        | C40  | -2.666849625 | -0.997787025                   | -5.361622989 |
|                                                        | C41  | -0.225904558 | -1.338197098                   | -4.841340762 |
|                                                        | C42  | 1.078564800  | -2.110296043                   | -5.126939224 |
|                                                        | C43  | 2.141241689  | -1.357096807                   | -5.928036867 |
|                                                        | C44  | -3.984467397 | 1.091975526                    | -5.077813450 |
|                                                        | C45  | -5.411801157 | 0.549178917                    | -5.185888284 |
|                                                        | C46  | -3.855121282 | 2.518036686                    | -5.631948440 |
|                                                        | C47  | -6.970436373 | -0.872805918                   | -6.420815938 |
|                                                        | C48  | -7.320066247 | -1.888965180                   | -5.326331231 |
| <b>Fe2-brNH2-Fe6<br/>2N2 dissociated<br/>35, S=1/2</b> |      |              |                                |              |
| <b>Fe(139) -2.425</b>                                  |      |              |                                |              |
| <b>Fe(140) -1.073</b>                                  |      |              |                                |              |
| <b>Fe(141) -2.562</b>                                  |      |              |                                |              |
| <b>Fe(142) 2.768</b>                                   |      |              |                                |              |
| <b>Fe(143) 3.011</b>                                   |      |              |                                |              |
| <b>Fe(144) 2.143</b>                                   |      |              |                                |              |
| <b>Fe(145) -1.397</b>                                  |      |              |                                |              |

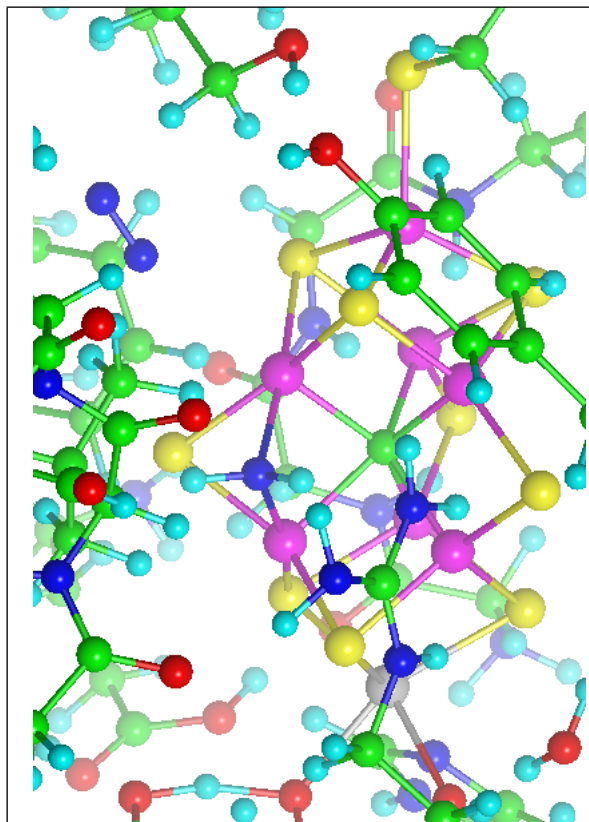

|      |               |              |              |
|------|---------------|--------------|--------------|
| C49  | -6.547442995  | -3.235194946 | -3.432962635 |
| C50  | -6.438806118  | -2.603785119 | -2.043303100 |
| C51  | -6.010456943  | -0.610096494 | -0.681193805 |
| C52  | -7.385975882  | -0.331155677 | -0.051426596 |
| C53  | -5.295029999  | 0.744017047  | -0.810991203 |
| C54  | -3.901177448  | 0.648545628  | -1.335467836 |
| C55  | -3.014942516  | -0.400105720 | -1.484539454 |
| C56  | -1.972083515  | 1.337241668  | -2.200705965 |
| C57  | -9.665162062  | 0.443296359  | -0.528921954 |
| C58  | -10.281768020 | -0.568086184 | 0.434308762  |
| C59  | -10.536156395 | 0.584331354  | -1.799984620 |
| C60  | -11.753181886 | 1.456014120  | -1.687563559 |
| C61  | -12.695902991 | 1.573573823  | -0.684554664 |
| C62  | -13.177761745 | 2.941509423  | -2.359867630 |
| C63  | 3.965255942   | -0.383526004 | 9.148418664  |
| C64  | 5.401896881   | -0.847656664 | 9.286732065  |
| C65  | 3.479283924   | -0.827135287 | 7.744320447  |
| C66  | 2.026227456   | -0.500609148 | 7.492027019  |
| C67  | 1.008960432   | -1.425061394 | 7.797399963  |
| C68  | 1.644416803   | 0.736312728  | 6.940783569  |
| C69  | -0.336510197  | -1.137775786 | 7.547064715  |
| C70  | 0.304600082   | 1.044504658  | 6.702148587  |
| C71  | -0.685632291  | 0.102348390  | 6.997473406  |
| C72  | 0.046699295   | 6.153782069  | 6.188834150  |
| C73  | -1.262497742  | 6.887591235  | 5.846375429  |
| C74  | 0.203503802   | 4.915119776  | 5.308787081  |
| C75  | -2.269527968  | 8.961296022  | 4.959584398  |
| C76  | -2.981930185  | 8.622286578  | 3.646712060  |
| C77  | -2.957897076  | 7.109435264  | 1.667181586  |
| C78  | -3.661290876  | 5.758582435  | 1.958964503  |
| C79  | -1.803300098  | 6.968953294  | 0.648617970  |
| C80  | -2.071090598  | 6.331630125  | -0.718685418 |
| C81  | -2.827853394  | 7.191356166  | -1.744635804 |
| C82  | -5.242550029  | 7.821581361  | -1.761604852 |
| C83  | -3.619993703  | 3.584415759  | 3.086198939  |
| C84  | -4.838140936  | 3.681709124  | 4.009029635  |
| C85  | -2.621367884  | 2.601030778  | 3.735833957  |
| C86  | -5.649116974  | 4.650893133  | 6.102477483  |
| C87  | -6.784595191  | 5.660827705  | 6.057919015  |
| C88  | -7.875150064  | 7.420674400  | 4.779417055  |
| C89  | -9.359304636  | 7.088511940  | 4.488009372  |
| C90  | -7.375684055  | 8.529167467  | 3.848460062  |
| C91  | -7.426023600  | 8.167673472  | 2.369700482  |
| C92  | -10.964743073 | 5.448670262  | 3.621111667  |
| C93  | -11.989341479 | 5.396944498  | 4.744104978  |
| C94  | -10.883645982 | 4.064018298  | 2.915787027  |
| C95  | -9.978163497  | 4.088787350  | 1.705397659  |
| C96  | -10.477416293 | 4.469199375  | 0.449862123  |
| C97  | -8.607922695  | 3.793865463  | 1.807273660  |
| C98  | -9.638371657  | 4.575483399  | -0.662476505 |
| C99  | -7.747660402  | 3.921146293  | 0.712126397  |
| C100 | -8.273275823  | 4.322783194  | -0.513898620 |
| C101 | 8.795080970   | 4.686886564  | -3.624845473 |
| C102 | 7.494201778   | 4.278823016  | -4.295612225 |
| C103 | 5.037273599   | 4.068767656  | -3.971964990 |
| C104 | 4.101360534   | 5.282964511  | -4.018500870 |
| C105 | 2.871800542   | 6.906848288  | -2.641582557 |
| C106 | 3.148008721   | 7.813251333  | -1.445091586 |
| C107 | 4.070547632   | 8.134276897  | 0.781658254  |
| C108 | 4.911343638   | 9.377137478  | 0.568493683  |
| C109 | 3.985396854   | 4.054398456  | -8.424331368 |
| C110 | 2.489079046   | 4.380102426  | -8.497280327 |
| C111 | 4.201561097   | 2.708034980  | -7.696627282 |
| C112 | 5.624208134   | 2.169479940  | -7.941922844 |
| C113 | 5.927024903   | 1.014043289  | -7.017020783 |
| C114 | 0.536402438   | 5.346914851  | -7.397931280 |
| C115 | 0.343015312   | 6.725220322  | -6.798658715 |
| C116 | -0.416124558  | 4.261882327  | -6.840288641 |
| C117 | 0.044827201   | 3.821554473  | -5.481314995 |
| C118 | -0.306204869  | 4.554573453  | -4.337291172 |
| C119 | 0.989280694   | 2.786455539  | -5.365874385 |
| C120 | 0.330545368   | 4.305200227  | -3.119366428 |
| C121 | 1.620624608   | 2.538925215  | -4.146801618 |
| C122 | 1.316397239   | 3.321521103  | -3.029890746 |
| C123 | 11.134586401  | 0.596914307  | 0.258339700  |
| C124 | 11.624919497  | -0.022126144 | 1.575770780  |
| C125 | 10.216617775  | -0.373273604 | -0.500964984 |
| C126 | 9.502765713   | 0.184110011  | -1.690800478 |
| C127 | 10.064299729  | 0.664378053  | -2.856366181 |
| C128 | 7.867832519   | 0.554875006  | -3.098860632 |
| C129 | 12.534667228  | -1.909912310 | 2.786635861  |
| C130 | 13.556510052  | -1.070989997 | 3.521019658  |

|       |              |               |              |
|-------|--------------|---------------|--------------|
| C131  | 4.728906525  | -4.302933497  | -2.769668329 |
| C132  | 5.664625942  | -4.367532095  | -1.563516723 |
| C133  | 6.875246466  | -3.388019665  | -1.638026222 |
| C134  | 7.930757334  | -3.927438407  | -2.641676322 |
| C135  | 9.280785715  | -3.206795236  | -2.623554496 |
| C136  | 10.368177369 | -3.866160895  | -3.501884057 |
| C137  | 7.542021308  | -3.287843177  | -0.257782282 |
| C138  | 3.763152808  | 1.587288645   | 1.057439468  |
| Fe139 | 5.319269303  | 1.967280319   | -0.153230487 |
| Fe140 | 1.795926976  | 1.497292196   | 0.870524252  |
| Fe141 | 3.572037806  | 1.905378606   | 3.013238514  |
| Fe142 | 3.645973129  | 3.554607028   | 0.975255057  |
| Fe143 | 1.661581393  | 3.704605114   | 2.750978547  |
| Fe144 | 5.166941802  | 0.328280150   | 1.790588070  |
| Fe145 | 3.524247673  | -0.041995423  | -0.166838825 |
| H146  | 0.164112209  | -6.140866161  | -7.821178929 |
| H147  | -0.108471156 | -4.583565543  | -8.227320654 |
| H148  | -4.232035314 | -5.656562778  | -8.376910571 |
| H149  | -2.149414688 | -5.154861996  | -9.361729108 |
| H150  | -1.834976221 | -6.846805568  | -8.997413425 |
| H151  | -4.428249924 | -4.550292477  | -5.797674165 |
| H152  | -4.037467763 | -7.961812627  | -6.596687817 |
| H153  | -5.736529905 | -5.376606091  | -6.671318228 |
| H154  | -3.913004654 | -9.812239824  | -5.198841047 |
| H155  | -2.010997684 | -7.451032817  | -4.965221149 |
| H156  | -5.078850161 | -9.041953246  | -4.097454504 |
| H157  | -2.159055419 | -3.928458337  | -1.176650676 |
| H158  | -2.515948170 | -5.460127617  | -3.579611876 |
| H159  | -0.118734951 | -7.043067094  | -3.679016263 |
| H160  | -6.086720930 | -5.956523820  | 0.489762213  |
| H161  | -4.726536501 | -6.352717423  | -2.031605053 |
| H162  | -0.583815089 | -8.322100387  | -2.529577977 |
| H163  | -3.516081537 | -3.828235495  | -2.315093468 |
| H164  | -3.847441681 | -8.610575100  | -0.590195233 |
| H165  | -6.312264229 | -7.323172272  | -0.638508535 |
| H166  | -0.040277654 | -4.253479135  | -0.049786410 |
| H167  | -0.197528084 | -2.510926521  | -0.386188389 |
| H168  | 0.980586150  | -3.093491663  | 0.817161534  |
| H169  | -2.070715339 | -3.384878501  | 1.061479070  |
| H170  | -3.099290476 | -10.420885023 | 0.657199116  |
| H171  | -4.536583192 | -1.975529513  | 2.654640880  |
| H172  | -4.330321950 | -6.331949504  | 3.809491152  |
| H173  | -6.696127890 | -4.325839238  | 5.632536078  |
| H174  | -1.377875632 | -1.003917583  | 1.193525556  |
| H175  | -0.259678271 | -1.363891140  | 2.522894939  |
| H176  | 3.361466904  | -0.925779636  | 9.901806933  |
| H177  | -6.238112868 | -1.651144888  | 3.024989686  |
| H178  | -7.464962423 | -2.984027235  | 4.751937811  |
| H179  | -4.976733790 | -1.239092951  | 4.214816295  |
| H180  | -6.240514711 | -2.645708182  | 6.001697057  |
| H181  | -5.748742132 | -4.086642339  | 3.328154967  |
| H182  | -3.698417618 | -3.090184844  | 5.378795575  |
| H183  | -3.404756281 | -4.162668849  | 2.656239908  |
| H184  | -2.012214365 | -1.559493919  | 2.752045392  |
| H185  | -1.643906404 | 2.693170762   | 3.235440208  |
| H186  | -3.017567092 | 1.589701691   | 3.559590941  |
| H187  | -2.365526771 | 1.980449341   | 5.583531483  |
| H188  | -2.584140904 | -0.298861400  | 6.933529296  |
| H189  | 0.024318821  | 1.997334012   | 6.252386509  |
| H190  | 2.410341802  | 1.460063778   | 6.654602561  |
| H191  | 1.272304961  | -2.397138410  | 8.222679812  |
| H192  | -1.606743005 | -5.798988917  | 1.594438674  |
| H193  | 0.694481698  | -7.893190681  | 1.081126373  |
| H194  | 0.244857947  | -8.518331556  | 2.684531604  |
| H195  | -1.594653336 | -7.860507811  | 0.460423927  |
| H196  | -4.094558711 | -9.893274443  | 2.036506250  |
| H197  | -1.108118108 | -1.882511468  | 7.757524928  |
| H198  | 0.193585058  | -3.929700876  | 3.031308302  |
| H199  | -5.468587708 | -7.643163789  | 5.965926786  |
| H200  | -4.294617419 | -8.372688223  | 4.841719324  |
| H201  | -2.458474769 | -7.227491336  | 6.499637956  |
| H202  | 10.409328954 | -6.113926020  | 6.861881976  |
| H203  | 4.167799633  | -1.170292838  | -6.138709394 |
| H204  | 5.347362366  | -2.461982624  | -2.782509339 |
| H205  | 5.703411441  | 1.810156020   | -8.977307932 |
| H206  | 6.360584608  | 2.973304978   | -7.795885519 |
| H207  | 3.471531866  | 1.960423074   | -8.045772288 |
| H208  | 1.241076602  | 7.384957273   | -6.857325510 |
| H209  | 4.266244112  | 3.903892974   | -9.479171372 |
| H210  | -0.005809811 | -0.271022918  | -4.685242775 |
| H211  | 0.857190970  | -3.036461547  | -5.686728060 |
| H212  | 2.516266181  | 5.193768007   | -6.585252876 |

|      |               |              |              |
|------|---------------|--------------|--------------|
| H213 | 0.266743459   | 5.492059407  | -8.465436638 |
| H214 | 4.643452888   | 5.327737252  | -6.919815759 |
| H215 | 3.684084065   | -2.234021640 | -4.822883436 |
| H216 | 4.012728257   | 2.847213686  | -6.620952623 |
| H217 | 5.752933499   | 5.049174971  | -8.104362625 |
| H218 | -1.306977195  | -1.147804756 | -7.968589177 |
| H219 | -0.648012484  | -1.694322272 | -3.892196354 |
| H220 | 6.830369114   | 2.291072846  | -5.825646960 |
| H221 | 1.519907941   | -2.436275388 | -4.173669001 |
| H222 | -5.475982029  | -1.266880805 | 0.019529122  |
| H223 | -3.181787720  | -1.447371756 | -1.245387349 |
| H224 | -7.571318480  | -3.620600347 | -3.530693004 |
| H225 | -5.332144049  | -2.032795185 | -4.720136065 |
| H226 | -8.163059387  | -0.137217437 | -1.940713029 |
| H227 | -12.793700323 | 1.097868218  | 0.284966050  |
| H228 | -10.012449265 | -1.627584806 | 0.202351350  |
| H229 | -10.799414232 | -0.422660583 | -2.169827145 |
| H230 | -9.581265465  | 1.415589293  | -0.017214470 |
| H231 | -13.712474436 | 3.690619143  | -2.938483613 |
| H232 | -5.300381254  | 1.207157298  | 0.189281513  |
| H233 | -5.893857724  | 1.398426633  | -1.465320466 |
| H234 | -14.409160188 | 2.852685104  | -0.623644984 |
| H235 | -9.903319691  | 1.042587971  | -2.576591109 |
| H236 | -5.963968171  | -0.739244523 | -2.825832012 |
| H237 | -5.876780202  | -4.107231064 | -3.457540682 |
| H238 | -7.787312042  | -0.138479164 | -6.423130046 |
| H239 | -1.212877455  | 2.017023965  | -2.580265279 |
| H240 | -6.982646613  | -1.388350783 | -7.390273910 |
| H241 | 4.032997734   | 1.334498538  | 10.263800461 |
| H242 | 2.999087506   | 1.414757684  | 9.000643966  |
| H243 | -2.025826754  | 5.036636210  | 3.048574889  |
| H244 | -3.979806918  | 3.132708421  | 2.151480120  |
| H245 | -3.881540389  | 5.157986456  | 5.063054437  |
| H246 | -3.619984276  | 2.701127672  | -1.870292107 |
| H247 | -4.878883855  | 3.883805984  | -3.290528110 |
| H248 | -4.821155139  | 4.215260060  | -5.493743353 |
| H249 | -5.799994005  | 4.027188617  | -2.009146920 |
| H250 | -2.818657481  | 2.854694015  | -5.463799885 |
| H251 | -4.057961663  | 2.515289708  | -6.714960346 |
| H252 | -6.367737519  | 8.841542895  | 4.156009500  |
| H253 | -8.048543735  | 9.389277815  | 3.990416442  |
| H254 | -5.478633006  | 8.823376362  | 2.125461280  |
| H255 | -6.299569839  | 8.186752325  | 0.702221582  |
| H256 | -5.726375378  | 9.819572306  | -1.685260729 |
| H257 | -2.427462560  | 7.006763282  | -2.753585698 |
| H258 | -10.049448770 | 4.864141299  | -1.633486593 |
| H259 | -8.180812368  | 3.450717324  | 2.753866818  |
| H260 | -6.735681370  | 6.427651685  | -1.485864968 |
| H261 | -1.013965635  | 6.372352760  | 1.133305230  |
| H262 | -1.511892524  | 7.273852372  | 3.222380415  |
| H263 | -2.559380139  | 5.349663076  | -0.616943779 |
| H264 | -4.931069537  | -0.414137258 | -6.921097340 |
| H265 | -1.947858083  | 10.009511834 | 4.907808130  |
| H266 | -2.266577809  | 0.663593597  | -6.372581607 |
| H267 | -1.376853269  | 7.974851400  | 0.497908469  |
| H268 | -6.678637680  | 3.741942893  | 0.828289792  |
| H269 | -3.028525348  | 8.881830570  | 5.750461667  |
| H270 | -4.076618583  | 9.488675517  | -2.115212581 |
| H271 | -7.273347160  | 8.019500292  | -1.911845882 |
| H272 | 0.061527307   | -0.594209707 | -7.182972504 |
| H273 | -1.447926837  | -2.547984074 | -6.140566180 |
| H274 | -11.542191744 | 4.682376561  | 0.329835485  |
| H275 | -3.778822182  | 1.112256892  | -3.998488974 |
| H276 | -3.735901317  | 7.784369165  | 1.299505866  |
| H277 | -2.659084333  | 8.253344635  | -1.522881311 |
| H278 | -1.079994032  | 6.133865381  | -1.148989523 |
| H279 | -4.535290140  | 5.918609145  | -1.913239003 |
| H280 | -6.095719782  | 3.650205057  | 6.209348512  |
| H281 | -6.297485874  | 6.109321280  | 4.121009399  |
| H282 | -7.906374250  | 7.849988795  | 5.793151034  |
| H283 | -5.065073153  | 4.860398806  | 7.009241223  |
| H284 | -8.858101907  | 5.210432496  | 3.906690545  |
| H285 | 8.611076699   | 5.519602138  | -2.929538705 |
| H286 | 9.099973356   | 3.818086136  | -3.005379155 |
| H287 | 10.553075735  | 1.481422007  | 0.557192142  |
| H288 | 10.711604721  | 5.092688430  | -4.189143228 |
| H289 | 9.816625999   | 4.368388451  | -5.354699705 |
| H290 | 1.143210481   | 4.420705172  | 5.589555617  |
| H291 | -0.779534449  | 5.211266180  | 7.799702732  |
| H292 | -0.192260227  | 8.496741322  | 5.137028835  |
| H293 | -0.637153892  | 4.227932593  | 5.477461634  |
| H294 | 0.040375852   | 6.568876028  | 8.200190353  |



|       |               |               |              |
|-------|---------------|---------------|--------------|
| H295  | 4.587142815   | 7.510255024   | 1.528184241  |
| H296  | 0.901171834   | 6.825994189   | 6.014660679  |
| H297  | 5.860733087   | -7.416776529  | 3.267025872  |
| H298  | 8.567504465   | -6.033306924  | 2.856641379  |
| H299  | 4.302561364   | 6.395203963   | -0.432221287 |
| H300  | 2.108232247   | -1.575217897  | 5.151285656  |
| H301  | 2.945778843   | 7.521713126   | -3.546738183 |
| H302  | 2.347244985   | 1.729408078   | -4.049880457 |
| H303  | 1.817582392   | 6.590050507   | -2.557254331 |
| H304  | 3.838183320   | -5.650613005  | 3.647635152  |
| H305  | 3.984099389   | 5.162647227   | -1.991693789 |
| H306  | 4.443503846   | -4.936634582  | 2.142149721  |
| H307  | 6.364119301   | -6.454061163  | 1.857341813  |
| H308  | 6.640396514   | -4.436310041  | 3.372089458  |
| H309  | 6.026947951   | -5.387460448  | 4.735253860  |
| H310  | -0.421273048  | 3.420723130   | -7.548108437 |
| H311  | 7.813947299   | -8.924490036  | 2.608614003  |
| H312  | 9.468476547   | -9.482124167  | 0.096028094  |
| H313  | 1.816994401   | 3.135555285   | -2.080019024 |
| H314  | 9.199496874   | -11.072980275 | 2.525834119  |
| H315  | 8.575259513   | -11.333355775 | 1.034693727  |
| H316  | 4.833748159   | -2.833971016  | 3.435029391  |
| H317  | 0.069292027   | 4.874129572   | -2.226589376 |
| H318  | 1.237894878   | 2.179377612   | -6.239710060 |
| H319  | 12.003962365  | -4.182219839  | 0.085016675  |
| H320  | 10.817793193  | -1.232453810  | -0.846188934 |
| H321  | 9.609941483   | -4.346736414  | 0.984788461  |
| H322  | 12.236868096  | -3.833923051  | -1.412929895 |
| H323  | 5.580773207   | 9.347865576   | -0.324556030 |
| H324  | 7.659403397   | -2.178071070  | 2.116858441  |
| H325  | 6.001732306   | -5.402396802  | -1.425997969 |
| H326  | 6.477351573   | 4.749076419   | -2.580268047 |
| H327  | 8.092581718   | -4.987606027  | -2.389309974 |
| H328  | 9.093450083   | 1.193622679   | -4.691228039 |
| H329  | 6.898414256   | 0.599487666   | -3.577970054 |
| H330  | 10.741473863  | -9.844662723  | 1.268599167  |
| H331  | 3.628947556   | -1.177698276  | 4.392647574  |
| H332  | 9.045196552   | -3.176430826  | 3.765895899  |
| H333  | 7.415663282   | -1.293227351  | 3.370659560  |
| H334  | 9.259366041   | -5.284382104  | 4.795719785  |
| H335  | 1.954653155   | -4.928770208  | 4.188374223  |
| H336  | 9.152755991   | -2.174972185  | -2.984596502 |
| H337  | 9.665311316   | -3.140859848  | -1.596772716 |
| H338  | 7.495567595   | -3.900086407  | -3.652398524 |
| H339  | 4.645683699   | 3.304583887   | -3.282960320 |
| H340  | -1.050413806  | 5.350070250   | -4.419555602 |
| H341  | -1.425275352  | 4.700659118   | -6.816142586 |
| H342  | 5.046125804   | -4.099779298  | -0.689858756 |
| H343  | 10.137777708  | -4.036857062  | 3.070528692  |
| H344  | 10.476449499  | -5.532464339  | 1.472944148  |
| H345  | 1.257979907   | -3.682213385  | 5.106167582  |
| H346  | 11.100363365  | 0.829639705   | -3.129358569 |
| H347  | 9.473293670   | -0.782635156  | 0.192702198  |
| H348  | 5.099298637   | 3.649126676   | -4.977765299 |
| H349  | 3.100245168   | 8.429147751   | 1.209400652  |
| H350  | 3.638069354   | -1.913086565  | 7.666166171  |
| H351  | 4.114107377   | -0.340232601  | 6.986023404  |
| H352  | 12.817127363  | 1.731624175   | -0.049885459 |
| H353  | 12.873273469  | 0.278997469   | -0.801758424 |
| H354  | 13.017665925  | -2.866772996  | 2.533772942  |
| H355  | 12.132158674  | -1.864904716  | 0.694122745  |
| H356  | 14.183362342  | -0.414651555  | 2.868655591  |
| H357  | 11.689135354  | -2.129418585  | 3.457469167  |
| H358  | 6.147954873   | -0.192990418  | 8.776072573  |
| H359  | -11.562236456 | 5.261403686   | 5.765611691  |
| H360  | 9.038529681   | -7.231891869  | 7.078928466  |
| H361  | 7.623050142   | -4.871401609  | 7.237519729  |
| H362  | -11.302747137 | 6.204008465   | 2.892007693  |
| H363  | -10.536953923 | 3.312653504   | 3.642281091  |
| H364  | -11.906835538 | 3.789596922   | 2.622233403  |
| H365  | -7.910313068  | 4.517567157   | -2.416082651 |
| H366  | 2.268839223   | -0.781104953  | 2.005229440  |
| H367  | 1.303673933   | -1.024231272  | 0.649509708  |
| Mo368 | 6.268618052   | -0.548635519  | -0.525325382 |
| N369  | 2.033845516   | -0.448234029  | 1.064902101  |
| N370  | -0.262810113  | -5.546561343  | -8.536564883 |
| N371  | -3.835221265  | -5.729819202  | -7.443479076 |
| N372  | -4.302113269  | -7.815070064  | -5.625358795 |
| N373  | -1.981082523  | -7.901853653  | -4.048437646 |
| N374  | -2.302487412  | -5.486221674  | -2.585391299 |
| N375  | -4.651584199  | -6.133268257  | -1.035770009 |
| N376  | -4.005879174  | -8.563009795  | 0.419711392  |

|      |               |               |              |
|------|---------------|---------------|--------------|
| N377 | -1.355233006  | -8.172618898  | 1.404736333  |
| N378 | -0.841725827  | -5.505654081  | 2.201737137  |
| N379 | -3.083330255  | -3.999699618  | 3.612397324  |
| N380 | -4.264481887  | -6.302881472  | 4.826978545  |
| N381 | 8.761909957   | -10.607388891 | 1.727961588  |
| N382 | 8.353712805   | -8.059955176  | 2.496736432  |
| N383 | 4.193851779   | -3.578284563  | 3.718789000  |
| N384 | 2.127113932   | -4.071420204  | 4.736483102  |
| N385 | 2.877447493   | -1.876111273  | 4.558673427  |
| N386 | 8.945909053   | -6.122678588  | 5.334913659  |
| N387 | -0.969428824  | -0.684717776  | -7.121542581 |
| N388 | 3.421001030   | -1.624222308  | -5.604695060 |
| N389 | -2.988499280  | 0.268142330   | -5.748120694 |
| N390 | -5.689409871  | -0.208125193  | -6.274449560 |
| N391 | -6.295424155  | -2.362276059  | -4.565546110 |
| N392 | -6.123941191  | -1.280024965  | -1.973114377 |
| N393 | -3.217871223  | 1.756279758   | -1.806405518 |
| N394 | -1.822855004  | 0.032785299   | -2.019180353 |
| N395 | -8.361682422  | -0.039508694  | -0.948187268 |
| N396 | -12.066442096 | 2.316247966   | -2.728257641 |
| N397 | -13.591336352 | 2.523623130   | -1.129814030 |
| N398 | 3.923801701   | 1.075468210   | 9.280031540  |
| N399 | 0.075799751   | 5.739873434   | 7.600343134  |
| N400 | -1.127773524  | 8.131837450   | 5.296269185  |
| N401 | -2.386043615  | 7.688029117   | 2.879310054  |
| N402 | -4.267594986  | 6.914986080   | -1.767039900 |
| N403 | -4.997006803  | 9.139934588   | -1.874443394 |
| N404 | -6.522733718  | 7.425580237   | -1.569945594 |
| N405 | -3.015866696  | 4.883419044   | 2.780734498  |
| N406 | -4.771924411  | 4.666767539   | 4.949175742  |
| N407 | -6.986618136  | 6.278131902   | 4.853971343  |
| N408 | -6.351464151  | 8.578328772   | 1.641009402  |
| N409 | -9.647572939  | 5.810386120   | 4.134613381  |
| N410 | 9.787187950   | 5.087799670   | -4.626084144 |
| N411 | 6.380264015   | 4.454400425   | -3.556342048 |
| N412 | 3.736264999   | 5.750723479   | -2.805888274 |
| N413 | 3.910155065   | 7.342432190   | -0.426315088 |
| N414 | 4.757316894   | 5.202172754   | -7.932745418 |
| N415 | 1.942226140   | 4.992325598   | -7.409756560 |
| N416 | 12.252041856  | 1.064792939   | -0.583762498 |
| N417 | 8.118019047   | 0.134171554   | -1.858883209 |
| N418 | 9.019445806   | 0.892087789   | -3.723298248 |
| N419 | 12.112158606  | -1.291791854  | 1.542382996  |
| N420 | -2.194633588  | 1.679314299   | 0.947410961  |
| N421 | -1.117281610  | 1.505468022   | 0.755637186  |
| O422 | -1.936277711  | -5.691889485  | -6.186432286 |
| O423 | -5.025951150  | -6.315064597  | -4.068108524 |
| O424 | -3.134141497  | -9.089005340  | -2.471752587 |
| O425 | -1.141617522  | -6.483816104  | -0.906031682 |
| O426 | -3.787283421  | -4.760245105  | 0.557949795  |
| O427 | -5.137709461  | -7.590531295  | 2.148838200  |
| O428 | -1.827090442  | -9.636296806  | 3.111091467  |
| O429 | 1.144230782   | -6.179463804  | 3.157983722  |
| O430 | -1.280443149  | -3.717121526  | 4.995817531  |
| O431 | -4.237939066  | -5.103383684  | 6.752899413  |
| O432 | -3.658569877  | -8.400529136  | 7.660330317  |
| O433 | 10.340114350  | -7.321747307  | 1.568736308  |
| O434 | 7.785341040   | -8.107269561  | 5.300328183  |
| O435 | 9.046757715   | -4.861187906  | 8.700578216  |
| O436 | -3.389861273  | -1.706984155  | -4.637071794 |
| O437 | 1.846322101   | -0.563773715  | -6.852379832 |
| O438 | -6.249984205  | 0.782635571   | -4.297689336 |
| O439 | -4.785995217  | 3.396467405   | -4.967975023 |
| O440 | -8.501748177  | -2.241119481  | -5.191850648 |
| O441 | -6.638534408  | -3.299726309  | -1.039167326 |
| O442 | -7.565375913  | -0.283080328  | 1.171142569  |
| O443 | -11.046057613 | -0.285901199  | 1.342369996  |
| O444 | 5.744338964   | -1.859072066  | 9.882433214  |
| O445 | -1.993579104  | 0.443817236   | 6.709389467  |
| O446 | -2.378031247  | 6.388067252   | 6.070623721  |
| O447 | -4.040701683  | 9.212390282   | 3.351732013  |
| O448 | -4.770274205  | 5.515931595   | 1.458278283  |
| O449 | -5.771107608  | 2.873019243   | 3.923299315  |
| O450 | -2.480650665  | 2.844554323   | 5.138430295  |
| O451 | -7.475944136  | 5.883994552   | 7.059440432  |
| O452 | -10.232713323 | 7.955928970   | 4.632132866  |
| O453 | -8.402048057  | 7.593454757   | 1.866794095  |
| O454 | -13.193693829 | 5.460397383   | 4.551389688  |
| O455 | -7.387344813  | 4.503181765   | -1.591352849 |
| O456 | 7.495346292   | 3.778818679   | -5.447396165 |
| O457 | 3.743096441   | 5.798272674   | -5.098367808 |
| O458 | 2.626991904   | 8.940935338   | -1.411272704 |

|                                               |      |              |                                |              |
|-----------------------------------------------|------|--------------|--------------------------------|--------------|
|                                               | O459 | 4.900820413  | 10.331256251                   | 1.330011648  |
|                                               | O460 | 1.812688199  | 4.081043834                    | -9.495847010 |
|                                               | O461 | 5.575135001  | -0.139739330                   | -7.234797284 |
|                                               | O462 | 6.579196209  | 1.318116818                    | -5.875015819 |
|                                               | O463 | -0.710725555 | 7.135382051                    | -6.334435509 |
|                                               | O464 | 11.625488592 | 0.627706835                    | 2.640233324  |
|                                               | O465 | 13.757481202 | -1.144418523                   | 4.726021918  |
|                                               | O466 | 4.599277585  | -3.092893451                   | -3.314001790 |
|                                               | O467 | 4.098135181  | -5.281254477                   | -3.172276755 |
|                                               | O468 | 11.554660557 | -3.918956718                   | -3.019029916 |
|                                               | O469 | 10.026553861 | -4.276955608                   | -4.646730236 |
|                                               | O470 | 7.619153944  | -2.093660691                   | 0.268866116  |
|                                               | O471 | 8.003487791  | -4.307298078                   | 0.291408370  |
|                                               | O472 | 6.377945207  | -2.100749418                   | -2.020751516 |
|                                               | O473 | 9.793638781  | -3.790502532                   | 3.973035663  |
|                                               | O474 | 7.589671210  | -2.215272170                   | 3.104678688  |
|                                               | O475 | -4.888385424 | 4.177057434                    | -2.343513975 |
|                                               | O476 | 12.701517875 | -3.848275581                   | -0.522646569 |
|                                               | O477 | 10.491845095 | -4.544519017                   | 1.400564755  |
|                                               | S478 | 0.245704017  | 5.334459403                    | 3.507332456  |
|                                               | S479 | 1.439209839  | 3.755543453                    | 0.450557318  |
|                                               | S480 | 4.814302845  | 0.676674977                    | -1.919556278 |
|                                               | S481 | 1.345710619  | 1.539221079                    | 3.177606068  |
|                                               | S482 | 1.743838446  | 0.727450256                    | -1.259946589 |
|                                               | S483 | 5.328885334  | 4.177866208                    | -0.359245445 |
|                                               | S484 | 4.671950776  | -1.658021007                   | 0.833431045  |
|                                               | S485 | 3.868629571  | 4.091450543                    | 3.184116091  |
|                                               | S486 | 7.075511529  | 1.122098391                    | 0.960368578  |
|                                               | S487 | 4.996083806  | 0.511545613                    | 3.979927567  |
|                                               | end  |              |                                |              |
| <b>Fe2-brNH2-Fe6<br/>2N2 TS<br/>35, S=1/2</b> |      |              | <b>bm6026nh22n2x1dtf.car_1</b> |              |
| <b>Fe( 139) -2.417</b>                        | C1   | -2.476513833 | -5.718727865                   | -7.314041582 |
| <b>Fe( 140) -0.993</b>                        | C2   | -1.702771500 | -5.824356728                   | -8.634258597 |
| <b>Fe( 141) -2.582</b>                        | C3   | -4.703301324 | -5.484262853                   | -6.296691755 |
| <b>Fe( 142) 2.788</b>                         | C4   | -4.686819731 | -6.575882533                   | -5.230207932 |
| <b>Fe( 143) 2.976</b>                         | C5   | -4.133137403 | -8.883102745                   | -4.647364022 |
| <b>Fe( 144) 2.160</b>                         | C6   | -3.032431146 | -8.622260360                   | -3.612153192 |
| <b>Fe( 145) -1.449</b>                        | C7   | -0.948744609 | -7.456731965                   | -3.096240351 |
|                                               | C8   | -1.468776871 | -6.424405258                   | -2.094448010 |
|                                               | C9   | -2.941402501 | -4.511556498                   | -1.700985237 |
|                                               | C10  | -3.833446085 | -5.145981634                   | -0.624996579 |
|                                               | C11  | -5.572354170 | -6.742349065                   | -0.078333313 |
|                                               | C12  | -4.881356502 | -7.657468574                   | 0.940776985  |
|                                               | C13  | -3.378991719 | -9.555910101                   | 1.282321900  |
|                                               | C14  | -2.114951651 | -9.114120014                   | 2.025942799  |
|                                               | C15  | -0.050736943 | -7.787812050                   | 1.894905316  |
|                                               | C16  | 0.104149439  | -6.389741171                   | 2.488217628  |
|                                               | C17  | -0.836157639 | -4.088081518                   | 2.644104046  |
|                                               | C18  | -1.761968336 | -3.911559328                   | 3.862946683  |
|                                               | C19  | -1.133531200 | -3.097891162                   | 1.499023166  |
|                                               | C20  | -1.248860360 | -1.665539131                   | 2.030379045  |
|                                               | C21  | -0.073914361 | -3.214527448                   | 0.396941416  |
|                                               | C22  | -4.088932397 | -3.838466718                   | 4.682491162  |
|                                               | C23  | -4.210186748 | -5.120698298                   | 5.518407273  |
|                                               | C24  | -5.449568421 | -3.359692653                   | 4.117165948  |
|                                               | C25  | -6.529673184 | -3.333845692                   | 5.206127082  |
|                                               | C26  | -5.308740517 | -1.975098068                   | 3.471902812  |
|                                               | C27  | -4.475119774 | -7.529580592                   | 5.556813018  |
|                                               | C28  | -3.477975963 | -7.708120150                   | 6.684118967  |
|                                               | C29  | 9.670989391  | -9.603994057                   | 1.165895208  |
|                                               | C30  | 9.494425465  | -8.214475299                   | 1.778847646  |
|                                               | C31  | 7.963074848  | -6.866169500                   | 3.223616422  |
|                                               | C32  | 8.224166833  | -7.092973607                   | 4.725851487  |
|                                               | C33  | 6.483542617  | -6.550827973                   | 2.940975359  |
|                                               | C34  | 5.990845005  | -5.279637522                   | 3.638484524  |
|                                               | C35  | 4.568641887  | -4.906886727                   | 3.210065598  |
|                                               | C36  | 3.086864454  | -3.191193739                   | 4.326550862  |
|                                               | C37  | 9.329085250  | -6.224834619                   | 6.731722981  |
|                                               | C38  | 8.605544621  | -5.237942631                   | 7.620453986  |
|                                               | C39  | -1.317225215 | -1.475418917                   | -5.924433073 |
|                                               | C40  | -2.668835479 | -1.001848060                   | -5.352825037 |
|                                               | C41  | -0.230063658 | -1.351115639                   | -4.838777792 |
|                                               | C42  | 1.075271493  | -2.120530885                   | -5.130702925 |
|                                               | C43  | 2.135596878  | -1.362132509                   | -5.929149985 |
|                                               | C44  | -3.982900870 | 1.088794481                    | -5.063353303 |
|                                               | C45  | -5.408602339 | 0.543928368                    | -5.172189082 |
|                                               | C46  | -3.859720054 | 2.513417069                    | -5.623588612 |
|                                               | C47  | -6.963514441 | -0.878137668                   | -6.415589145 |
|                                               | C48  | -7.312830476 | -1.896155528                   | -5.323099212 |
|                                               | C49  | -6.541004123 | -3.233683258                   | -3.425338913 |
|                                               | C50  | -6.430243845 | -2.601080504                   | -2.035484609 |

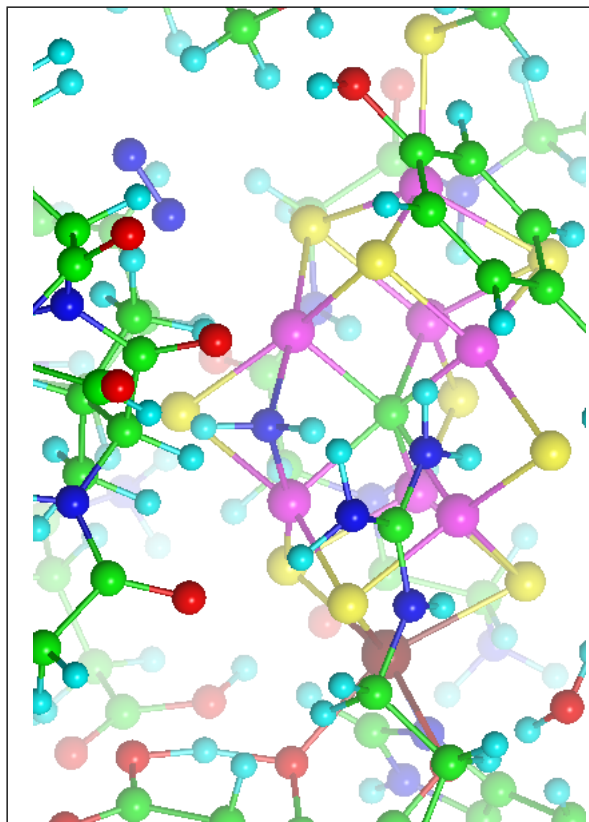

|      |               |              |              |
|------|---------------|--------------|--------------|
| C51  | -6.007316979  | -0.610390416 | -0.671176715 |
| C52  | -7.387354267  | -0.335905421 | -0.052025771 |
| C53  | -5.293579494  | 0.746078412  | -0.794182491 |
| C54  | -3.899099011  | 0.658073551  | -1.318436070 |
| C55  | -3.009425013  | -0.385567113 | -1.474394262 |
| C56  | -1.971020184  | 1.361328111  | -2.172101451 |
| C57  | -9.663744543  | 0.430342107  | -0.542172965 |
| C58  | -10.285006994 | -0.589103450 | 0.409715529  |
| C59  | -10.530281492 | 0.580701556  | -1.816391322 |
| C60  | -11.747762493 | 1.451037873  | -1.700970218 |
| C61  | -12.686515247 | 1.565601036  | -0.693983153 |
| C62  | -13.173490762 | 2.940302684  | -2.362431720 |
| C63  | 3.959473973   | -0.393700927 | 9.148893636  |
| C64  | 5.398435885   | -0.854821121 | 9.284943641  |
| C65  | 3.472818646   | -0.838517891 | 7.746441892  |
| C66  | 2.019236630   | -0.509589775 | 7.497584422  |
| C67  | 0.999685954   | -1.430822041 | 7.806439574  |
| C68  | 1.638212670   | 0.729036665  | 6.949480212  |
| C69  | -0.346254488  | -1.139174446 | 7.561687253  |
| C70  | 0.298010529   | 1.041657919  | 6.716886634  |
| C71  | -0.693905497  | 0.102365656  | 7.015136290  |
| C72  | 0.044283219   | 6.145367138  | 6.190605350  |
| C73  | -1.261082329  | 6.880814364  | 5.843254666  |
| C74  | 0.202237592   | 4.908397993  | 5.309158149  |
| C75  | -2.263155101  | 8.957528910  | 4.955898861  |
| C76  | -2.978493031  | 8.613673701  | 3.646472515  |
| C77  | -2.954791685  | 7.108366372  | 1.662388129  |
| C78  | -3.661311288  | 5.757228886  | 1.950561119  |
| C79  | -1.800659768  | 6.961090683  | 0.645152652  |
| C80  | -2.074118673  | 6.324077826  | -0.721602697 |
| C81  | -2.824372317  | 7.189105917  | -1.747800947 |
| C82  | -5.238417678  | 7.821616732  | -1.761724819 |
| C83  | -3.616549128  | 3.576440600  | 3.065102023  |
| C84  | -4.837196749  | 3.676227180  | 3.985539000  |
| C85  | -2.622099884  | 2.593183520  | 3.716166803  |
| C86  | -5.641678404  | 4.647963108  | 6.080391111  |
| C87  | -6.773579333  | 5.659985171  | 6.044677153  |
| C88  | -7.874039858  | 7.421429355  | 4.775338325  |
| C89  | -9.360013392  | 7.089214129  | 4.486343027  |
| C90  | -7.378152128  | 8.530649197  | 3.842149847  |
| C91  | -7.426338253  | 8.162863386  | 2.364954090  |
| C92  | -10.964143695 | 5.451228944  | 3.616948631  |
| C93  | -11.988708071 | 5.397860449  | 4.740596355  |
| C94  | -10.883208728 | 4.066301873  | 2.914136420  |
| C95  | -9.977037300  | 4.088617047  | 1.702627118  |
| C96  | -10.479130997 | 4.457293149  | 0.444567379  |
| C97  | -8.605270287  | 3.800113381  | 1.805498495  |
| C98  | -9.641366961  | 4.560638202  | -0.668167368 |
| C99  | -7.746073542  | 3.925261961  | 0.709729418  |
| C100 | -8.275035131  | 4.316959890  | -0.518222525 |
| C101 | 8.791948224   | 4.687077923  | -3.621596360 |
| C102 | 7.492815414   | 4.281997488  | -4.297670539 |
| C103 | 5.034030666   | 4.071778652  | -3.98092032  |
| C104 | 4.095545856   | 5.283585240  | -4.023610088 |
| C105 | 2.867821528   | 6.907068808  | -2.646105375 |
| C106 | 3.133492588   | 7.809442059  | -1.443485492 |
| C107 | 4.052584347   | 8.128649829  | 0.786093579  |
| C108 | 4.923566195   | 9.352473827  | 0.585460334  |
| C109 | 3.973948620   | 4.048066537  | -8.423280156 |
| C110 | 2.477260445   | 4.371381343  | -8.496054686 |
| C111 | 4.194127155   | 2.703435418  | -7.692126217 |
| C112 | 5.617655485   | 2.169941941  | -7.939315484 |
| C113 | 5.925715129   | 1.015634849  | -7.013552205 |
| C114 | 0.522762937   | 5.335243010  | -7.394080802 |
| C115 | 0.329568457   | 6.713682441  | -6.795469389 |
| C116 | -0.426776054  | 4.250394198  | -6.829649252 |
| C117 | 0.043760017   | 3.814832412  | -5.472401812 |
| C118 | -0.298615041  | 4.550402297  | -4.327945650 |
| C119 | 0.991147498   | 2.781627031  | -5.360869445 |
| C120 | 0.350702524   | 4.308253752  | -3.115282003 |
| C121 | 1.635703173   | 2.540507194  | -4.146834423 |
| C122 | 1.341118167   | 3.328705294  | -3.030775449 |
| C123 | 11.136688679  | 0.596703503  | 0.260416833  |
| C124 | 11.626806693  | -0.023314858 | 1.578329529  |
| C125 | 10.227117563  | -0.378489629 | -0.506190540 |
| C126 | 9.507168374   | 0.181950355  | -1.691174998 |
| C127 | 10.064038568  | 0.665367713  | -2.857080046 |
| C128 | 7.865772909   | 0.573885316  | -3.087259979 |
| C129 | 12.535785262  | -1.911151852 | 2.788605775  |
| C130 | 13.554133071  | -1.072196904 | 3.527092206  |
| C131 | 4.735523898   | -4.283719259 | -2.790193406 |
| C132 | 5.679253024   | -4.367140870 | -1.589078681 |

|       |              |               |              |
|-------|--------------|---------------|--------------|
| C133  | 6.891384767  | -3.390857761  | -1.651567100 |
| C134  | 7.952671436  | -3.929303001  | -2.648253455 |
| C135  | 9.304359128  | -3.209172185  | -2.629094449 |
| C136  | 10.386122658 | -3.866705451  | -3.512809960 |
| C137  | 7.548327282  | -3.293463123  | -0.264527705 |
| C138  | 3.762302682  | 1.580746749   | 1.058678543  |
| Fe139 | 5.317114138  | 1.951204474   | -0.160080037 |
| Fe140 | 1.779446901  | 1.518511682   | 0.888792701  |
| Fe141 | 3.593654186  | 1.913523172   | 3.019234013  |
| Fe142 | 3.665289316  | 3.559810684   | 0.974594449  |
| Fe143 | 1.698722401  | 3.724217997   | 2.758849557  |
| Fe144 | 5.167996196  | 0.306591146   | 1.791399180  |
| Fe145 | 3.504627409  | -0.043466657  | -0.158474576 |
| H146  | 0.156862746  | -6.148268845  | -7.863164966 |
| H147  | -0.117485246 | -4.590156603  | -8.263842225 |
| H148  | -4.242211770 | -5.660440292  | -8.371843825 |
| H149  | -2.171845460 | -5.158324727  | -9.376645027 |
| H150  | -1.857895201 | -6.849755976  | -9.010887718 |
| H151  | -4.418316968 | -4.548396297  | -5.791987126 |
| H152  | -4.024724073 | -7.958584252  | -6.587831267 |
| H153  | -5.733554754 | -5.369727028  | -6.658938250 |
| H154  | -3.899119352 | -9.808295431  | -5.189342526 |
| H155  | -1.994053091 | -7.449878856  | -4.957376736 |
| H156  | -5.065656663 | -9.038131237  | -4.089462940 |
| H157  | -2.184030363 | -3.913573567  | -1.183017874 |
| H158  | -2.521319168 | -5.460744114  | -3.577551462 |
| H159  | -0.109690846 | -7.031028043  | -3.661778023 |
| H160  | -6.091524494 | -5.962000388  | 0.492438192  |
| H161  | -4.733246070 | -6.359853049  | -2.030339255 |
| H162  | -0.578087724 | -8.306999223  | -2.511092992 |
| H163  | -3.540189671 | -3.834562740  | -2.324526993 |
| H164  | -3.849671877 | -8.613300893  | -0.584170904 |
| H165  | -6.316318358 | -7.332756408  | -0.631284890 |
| H166  | -0.083285774 | -4.207913779  | -0.071915672 |
| H167  | -0.250025304 | -2.462968314  | -0.388909207 |
| H168  | 0.937568521  | -3.052976668  | 0.800607449  |
| H169  | -2.106973173 | -3.376464067  | 1.062829176  |
| H170  | -3.104055012 | -10.424804218 | 0.665857598  |
| H171  | -4.558669448 | -1.965173696  | 2.668705474  |
| H172  | -4.338078838 | -6.320138908  | 3.815608058  |
| H173  | -6.706514416 | -4.325664606  | 5.647284383  |
| H174  | -1.468616012 | -0.988226354  | 1.196074867  |
| H175  | -0.315826276 | -1.324269210  | 2.503928852  |
| H176  | 3.359500395  | -0.936893676  | 9.903074574  |
| H177  | -6.262557081 | -1.650360144  | 3.033125505  |
| H178  | -7.476956815 | -2.979911874  | 4.774154013  |
| H179  | -5.009215614 | -1.229889469  | 4.226521873  |
| H180  | -6.246609781 | -2.648301239  | 6.020920992  |
| H181  | -5.765852464 | -4.082274561  | 3.341511190  |
| H182  | -3.708250376 | -3.079255193  | 5.381918058  |
| H183  | -3.424563323 | -4.157097442  | 2.659619097  |
| H184  | -2.058848689 | -1.555556501  | 2.767302873  |
| H185  | -1.639922894 | 2.693960214   | 3.227880824  |
| H186  | -3.011984594 | 1.581511027   | 3.528134226  |
| H187  | -2.369805235 | 1.960203502   | 5.560709441  |
| H188  | -2.593025796 | -0.293691198  | 6.955100441  |
| H189  | 0.020002251  | 1.996783900   | 6.270025064  |
| H190  | 2.406408235  | 1.449990900   | 6.661441137  |
| H191  | 1.262079829  | -2.403297715  | 8.231756939  |
| H192  | -1.608062278 | -5.769682364  | 1.569674870  |
| H193  | 0.679421486  | -7.860356770  | 1.075229043  |
| H194  | 0.244986904  | -8.493891612  | 2.679794471  |
| H195  | -1.615976530 | -7.839763742  | 0.471298790  |
| H196  | -4.089733618 | -9.888455397  | 2.049389809  |
| H197  | -1.119575035 | -1.881047949  | 7.776345685  |
| H198  | 0.175525481  | -3.899768995  | 3.022069334  |
| H199  | -5.495247101 | -7.619717807  | 5.964989036  |
| H200  | -4.322214954 | -8.359807820  | 4.849288389  |
| H201  | -2.485526868 | -7.228124488  | 6.519665604  |
| H202  | 10.415483382 | -6.109916454  | 6.866287581  |
| H203  | 4.160481079  | -1.163945772  | -6.136309569 |
| H204  | 5.381037767  | -2.448726137  | -2.790581044 |
| H205  | 5.697882762  | 1.808964918   | -8.974424774 |
| H206  | 6.352954949  | 2.975376780   | -7.796215595 |
| H207  | 3.465883905  | 1.954160183   | -8.038868179 |
| H208  | 1.228540136  | 7.372446239   | -6.850852007 |
| H209  | 4.254191234  | 3.897116563   | -9.476627084 |
| H210  | -0.009319705 | -0.285682177  | -4.673878973 |
| H211  | 0.853363400  | -3.044834911  | -5.694328831 |
| H212  | 2.502268381  | 5.184232910   | -6.583410157 |
| H213  | 0.250559513  | 5.477746685   | -8.460652801 |
| H214  | 4.628742589  | 5.328855338   | -6.921678357 |

|      |               |              |              |
|------|---------------|--------------|--------------|
| H215 | 3.684145387   | -2.228657575 | -4.819724931 |
| H216 | 4.004813422   | 2.844638379  | -6.617492051 |
| H217 | 5.738981380   | 5.048574968  | -8.106247596 |
| H218 | -1.314566588  | -1.145254697 | -7.963393243 |
| H219 | -0.653415707  | -1.715220961 | -3.892417649 |
| H220 | 6.835124615   | 2.294207001  | -5.829966110 |
| H221 | 1.517544863   | -2.449554259 | -4.178794072 |
| H222 | -5.475527000  | -1.265628805 | 0.032247100  |
| H223 | -3.173147120  | -1.434804400 | -1.248049777 |
| H224 | -7.566057558  | -3.618112634 | -3.518960606 |
| H225 | -5.325465623  | -2.033878902 | -4.712002893 |
| H226 | -8.149252037  | -0.135997445 | -1.947270328 |
| H227 | -12.778289005 | 1.087741035  | 0.275060450  |
| H228 | -10.012938585 | -1.645840530 | 0.169864573  |
| H229 | -10.790238684 | -0.422592551 | -2.198079545 |
| H230 | -9.586632023  | 1.399359971  | -0.022669178 |
| H231 | -13.710648043 | 3.691179039  | -2.936598578 |
| H232 | -5.303357131  | 1.206371497  | 0.208858151  |
| H233 | -5.894915088  | 1.402081066  | -1.446510053 |
| H234 | -14.397392170 | 2.846349151  | -0.619614111 |
| H235 | -9.892204663  | 1.047884752  | -2.582178922 |
| H236 | -5.952208641  | -0.735337184 | -2.816293815 |
| H237 | -5.871707120  | -4.106649363 | -3.446611677 |
| H238 | -7.782604385  | -0.145127679 | -6.419859503 |
| H239 | -1.211396890  | 2.047588124  | -2.537973506 |
| H240 | -6.972132352  | -1.391184453 | -7.386905996 |
| H241 | 4.023892482   | 1.323698786  | 10.265703056 |
| H242 | 2.992630445   | 1.402985574  | 9.000123917  |
| H243 | -2.021138457  | 5.028026007  | 3.030249280  |
| H244 | -3.979738316  | 3.125016297  | 2.131909086  |
| H245 | -3.877556423  | 5.151342303  | 5.034730872  |
| H246 | -3.622182275  | 2.717772548  | -1.826850708 |
| H247 | -4.872518846  | 3.876777957  | -3.287864670 |
| H248 | -4.839207163  | 4.203569891  | -5.496399678 |
| H249 | -5.802335217  | 4.028145162  | -2.013139130 |
| H250 | -2.824782164  | 2.856829184  | -5.456606008 |
| H251 | -4.062141927  | 2.504716099  | -6.707186184 |
| H252 | -6.371460961  | 8.843739870  | 4.149771557  |
| H253 | -8.053784858  | 9.388839060  | 3.981971343  |
| H254 | -5.472845502  | 8.801463816  | 2.126230602  |
| H255 | -6.289516766  | 8.158637069  | 0.704046318  |
| H256 | -5.717936659  | 9.817739337  | -1.650568317 |
| H257 | -2.421690788  | 7.005872166  | -2.756049559 |
| H258 | -10.055377644 | 4.839906099  | -1.640222902 |
| H259 | -8.178623085  | 3.462391799  | 2.753921523  |
| H260 | -6.730778312  | 6.425590865  | -1.490799849 |
| H261 | -1.015088941  | 6.359229037  | 1.129392044  |
| H262 | -1.504439905  | 7.272460526  | 3.215226028  |
| H263 | -2.571371354  | 5.346476025  | -0.617834472 |
| H264 | -4.925882826  | -0.411559395 | -6.911334415 |
| H265 | -1.934647735  | 10.003468936 | 4.895521540  |
| H266 | -2.266248098  | 0.662436089  | -6.358418335 |
| H267 | -1.366691967  | 7.963604386  | 0.493040814  |
| H268 | -6.676525907  | 3.752758134  | 0.827181022  |
| H269 | -3.019666339  | 8.887032948  | 5.750256227  |
| H270 | -4.070569105  | 9.491359046  | -2.088760587 |
| H271 | -7.270426085  | 8.018644783  | -1.907130216 |
| H272 | 0.056248781   | -0.597997311 | -7.178605661 |
| H273 | -1.454783271  | -2.551806822 | -6.144298398 |
| H274 | -11.544776586 | 4.663513423  | 0.322686768  |
| H275 | -3.777723811  | 1.113469629  | -3.983787184 |
| H276 | -3.730075474  | 7.786562233  | 1.293623107  |
| H277 | -2.653243028  | 8.250430080  | -1.522783840 |
| H278 | -1.084541264  | 6.116763222  | -1.151552565 |
| H279 | -4.531767776  | 5.919311714  | -1.923444836 |
| H280 | -6.089410323  | 3.647970187  | 6.186875007  |
| H281 | -6.300366526  | 6.110717958  | 4.104740308  |
| H282 | -7.901112318  | 7.848862959  | 5.789908433  |
| H283 | -5.049497853  | 4.852873669  | 6.982640837  |
| H284 | -8.857426106  | 5.213221328  | 3.900536516  |
| H285 | 8.604520095   | 5.513394299  | -2.919541914 |
| H286 | 9.096032247   | 3.812918965  | -3.008201557 |
| H287 | 10.547519028  | 1.477063040  | 0.555651651  |
| H288 | 10.707664901  | 5.098478265  | -4.178221823 |
| H289 | 9.815463703   | 4.385511171  | -5.352213864 |
| H290 | 1.139302061   | 4.411866718  | 5.594188905  |
| H291 | -0.790883906  | 5.205252358  | 7.798928085  |
| H292 | -0.185497588  | 8.490921675  | 5.144486691  |
| H293 | -0.640036576  | 4.220917872  | 5.471026080  |
| H294 | 0.035473913   | 6.558615568  | 8.204417971  |
| H295 | 4.545157002   | 7.493304471  | 1.539735955  |
| H296 | 0.901887798   | 6.814969363  | 6.021565913  |

|       |               |               |              |
|-------|---------------|---------------|--------------|
| H297  | 5.871747776   | -7.416683543  | 3.246555877  |
| H298  | 8.582608109   | -6.038852125  | 2.856261271  |
| H299  | 4.287952740   | 6.391345441   | -0.430848663 |
| H300  | 2.127774697   | -1.588651116  | 5.165637278  |
| H301  | 2.949325112   | 7.527114627   | -3.547086798 |
| H302  | 2.364809808   | 1.732692325   | -4.053497939 |
| H303  | 1.812945791   | 6.589388630   | -2.575430252 |
| H304  | 3.844719512   | -5.641280358  | 3.581388740  |
| H305  | 3.985886030   | 5.164274524   | -1.997760294 |
| H306  | 4.496266252   | -4.902180373  | 2.109076378  |
| H307  | 6.387847840   | -6.443082235  | 1.848236344  |
| H308  | 6.663350171   | -4.441023701  | 3.399959968  |
| H309  | 6.009777497   | -5.407655579  | 4.732514485  |
| H310  | -0.435255663  | 3.406711674   | -7.534404558 |
| H311  | 7.821999896   | -8.928525230  | 2.609492895  |
| H312  | 9.459287442   | -9.486047059  | 0.091945515  |
| H313  | 1.852057203   | 3.151306861   | -2.084863444 |
| H314  | 9.206909626   | -11.077003886 | 2.524688039  |
| H315  | 8.575562276   | -11.340845342 | 1.037416409  |
| H316  | 4.831323082   | -2.817775118  | 3.395140757  |
| H317  | 0.096915678   | 4.883543827   | -2.224789864 |
| H318  | 1.230527009   | 2.171696189   | -6.236258956 |
| H319  | 12.004589607  | -4.182786012  | 0.076210660  |
| H320  | 10.835844043  | -1.228875583  | -0.859041323 |
| H321  | 9.612314058   | -4.352171475  | 0.983353006  |
| H322  | 12.242372475  | -3.841756458  | -1.423093650 |
| H323  | 5.600303764   | 9.311105689   | -0.300946860 |
| H324  | 7.659544966   | -2.183045170  | 2.114599261  |
| H325  | 6.014032247   | -5.404901490  | -1.471561711 |
| H326  | 6.470143574   | 4.750977862   | -2.585306802 |
| H327  | 8.114040333   | -4.987599456  | -2.389929553 |
| H328  | 9.085730367   | 1.210549911   | -4.683993307 |
| H329  | 6.892653244   | 0.630180503   | -3.556695856 |
| H330  | 10.741972142  | -9.852360984  | 1.252610818  |
| H331  | 3.633224259   | -1.178321974  | 4.385926175  |
| H332  | 9.048847627   | -3.178798394  | 3.764150193  |
| H333  | 7.422302159   | -1.297214121  | 3.370392658  |
| H334  | 9.269548949   | -5.289096312  | 4.794609541  |
| H335  | 1.982778406   | -4.935965862  | 4.200186195  |
| H336  | 9.177713705   | -2.174385544  | -2.983574567 |
| H337  | 9.690296494   | -3.150535644  | -1.601854577 |
| H338  | 7.524053238   | -3.905177107  | -3.661220742 |
| H339  | 4.644735873   | 3.304999339   | -3.293768443 |
| H340  | -1.045045444  | 5.343933356   | -4.407403169 |
| H341  | -1.435318185  | 4.689591882   | -6.801639572 |
| H342  | 5.066000009   | -4.114673090  | -0.707695147 |
| H343  | 10.141669880  | -4.038139714  | 3.069715048  |
| H344  | 10.481191020  | -5.536534395  | 1.470096314  |
| H345  | 1.299915783   | -3.697670008  | 5.131642544  |
| H346  | 11.099982693  | 0.820943122   | -3.135293026 |
| H347  | 9.488452199   | -0.800895005  | 0.184899692  |
| H348  | 5.099341923   | 3.657216771   | -4.988777754 |
| H349  | 3.081699869   | 8.442741857   | 1.198504051  |
| H350  | 3.629357043   | -1.924550677  | 7.668360175  |
| H351  | 4.106958145   | -0.353004536  | 6.986738148  |
| H352  | 12.809611243  | 1.749360610   | -0.040840493 |
| H353  | 12.887748441  | 0.294506288   | -0.786476144 |
| H354  | 13.018525504  | -2.868370343  | 2.532122273  |
| H355  | 12.134449083  | -1.864975032  | 0.694968424  |
| H356  | 14.182321523  | -0.414636737  | 2.878263890  |
| H357  | 11.686582349  | -2.133136951  | 3.454502325  |
| H358  | 6.142082516   | -0.202108911  | 8.765081718  |
| H359  | -11.561798961 | 5.251018699   | 5.760705428  |
| H360  | 9.051036617   | -7.235399182  | 7.079440612  |
| H361  | 7.623122322   | -4.879520935  | 7.226970809  |
| H362  | -11.302654293 | 6.204197546   | 2.885449397  |
| H363  | -10.535837269 | 3.314485633   | 3.641070882  |
| H364  | -11.906375476 | 3.789442457   | 2.619512455  |
| H365  | -7.913551123  | 4.512767294   | -2.422332266 |
| H366  | 2.257990476   | -0.766578365  | 2.017799612  |
| H367  | 1.270895671   | -0.992825271  | 0.675494513  |
| Mo368 | 6.270903566   | -0.555410602  | -0.534333774 |
| N369  | 2.016389385   | -0.429594857  | 1.081399832  |
| N370  | -0.277905353  | -5.552293459  | -8.571627971 |
| N371  | -3.837955948  | -5.729357392  | -7.440860531 |
| N372  | -4.288354232  | -7.811198546  | -5.616500872 |
| N373  | -1.968627464  | -7.894392757  | -4.037575883 |
| N374  | -2.308502020  | -5.480870303  | -2.582912469 |
| N375  | -4.658561059  | -6.138143061  | -1.034783623 |
| N376  | -4.008147979  | -8.564932105  | 0.425670689  |
| N377  | -1.364885013  | -8.158543438  | 1.409980824  |
| N378  | -0.852646112  | -5.480325858  | 2.191191522  |

|      |               |               |              |
|------|---------------|---------------|--------------|
| N379 | -3.099243279  | -3.992289708  | 3.614250728  |
| N380 | -4.275794971  | -6.290683051  | 4.833109868  |
| N381 | 8.764877832   | -10.613124671 | 1.728230504  |
| N382 | 8.364451217   | -8.065441743  | 2.498818577  |
| N383 | 4.208094541   | -3.569848543  | 3.696661174  |
| N384 | 2.165017991   | -4.084479349  | 4.752286279  |
| N385 | 2.885213983   | -1.880852026  | 4.553204806  |
| N386 | 8.956152629   | -6.126894774  | 5.334318977  |
| N387 | -0.974890326  | -0.685057434  | -7.115561509 |
| N388 | 3.415859403   | -1.621296455  | -5.602458391 |
| N389 | -2.986694479  | 0.266108858   | -5.732823454 |
| N390 | -5.684736438  | -0.209694313  | -6.263891472 |
| N391 | -6.288865459  | -2.364084840  | -4.558909870 |
| N392 | -6.109139456  | -1.278728127  | -1.964237398 |
| N393 | -3.218355528  | 1.773051252   | -1.775671120 |
| N394 | -1.818250657  | 0.056572371   | -2.002190468 |
| N395 | -8.356880913  | -0.046077117  | -0.955826291 |
| N396 | -12.064655186 | 2.314120872   | -2.736910697 |
| N397 | -13.582583888 | 2.518460205   | -1.131986597 |
| N398 | 3.917251152   | 1.065147153   | 9.281499299  |
| N399 | 0.067821259   | 5.729831724   | 7.602799263  |
| N400 | -1.122557381  | 8.125848056   | 5.295991625  |
| N401 | -2.379842828  | 7.685178505   | 2.874092563  |
| N402 | -4.263780534  | 6.915169148   | -1.775369209 |
| N403 | -4.996248600  | 9.140523003   | -1.873957928 |
| N404 | -6.518335867  | 7.424443560   | -1.567792756 |
| N405 | -3.011422445  | 4.875673266   | 2.762306699  |
| N406 | -4.769898960  | 4.663248357   | 4.922954864  |
| N407 | -6.984052190  | 6.278623809   | 4.843033074  |
| N408 | -6.344807125  | 8.559574039   | 1.638679411  |
| N409 | -9.647370902  | 5.812399660   | 4.128766944  |
| N410 | 9.784323006   | 5.097567532   | -4.617136885 |
| N411 | 6.376104954   | 4.458650245   | -3.562596362 |
| N412 | 3.734941764   | 5.752920397   | -2.810203470 |
| N413 | 3.893091996   | 7.337500306   | -0.423006040 |
| N414 | 4.742835375   | 5.199849750   | -7.934668937 |
| N415 | 1.928872116   | 4.981222245   | -7.407711290 |
| N416 | 12.255264081  | 1.073346549   | -0.575101575 |
| N417 | 8.121123592   | 0.141439961   | -1.852512845 |
| N418 | 9.015555324   | 0.906820005   | -3.716483962 |
| N419 | 12.115415777  | -1.292158700  | 1.543538376  |
| N420 | -1.985017768  | 1.732653866   | 0.929030411  |
| N421 | -0.901365912  | 1.517760950   | 0.818829892  |
| O422 | -1.927125048  | -5.684747300  | -6.200008709 |
| O423 | -5.021532552  | -6.314119526  | -4.061622824 |
| O424 | -3.123679556  | -9.079798750  | -2.461026882 |
| O425 | -1.145740224  | -6.464985290  | -0.896695458 |
| O426 | -3.800651257  | -4.755650511  | 0.554107240  |
| O427 | -5.140216556  | -7.589386473  | 2.153383038  |
| O428 | -1.805892169  | -9.659519129  | 3.094281335  |
| O429 | 1.119677097   | -6.161357697  | 3.172777840  |
| O430 | -1.295897169  | -3.700552424  | 4.993113607  |
| O431 | -4.249055777  | -5.092191037  | 6.759670878  |
| O432 | -3.701920736  | -8.392643587  | 7.672165996  |
| O433 | 10.347956149  | -7.329542766  | 1.563285759  |
| O434 | 7.789585165   | -8.108294462  | 5.299640135  |
| O435 | 9.038180515   | -4.862886646  | 8.698985803  |
| O436 | -3.391763027  | -1.712382786  | -4.629226918 |
| O437 | 1.838907072   | -0.570236893  | -6.854504158 |
| O438 | -6.246093733  | 0.772385965   | -4.282118059 |
| O439 | -4.795874618  | 3.389313564   | -4.964175585 |
| O440 | -8.493780349  | -2.252456081  | -5.192429332 |
| O441 | -6.633357128  | -3.297378067  | -1.032232010 |
| O442 | -7.577102364  | -0.290969310  | 1.168938764  |
| O443 | -11.054211694 | -0.314834889  | 1.315932410  |
| O444 | 5.747320597   | -1.860138677  | 9.887268168  |
| O445 | -2.000624184  | 0.447257639   | 6.731659120  |
| O446 | -2.379135314  | 6.382674464   | 6.057722360  |
| O447 | -4.041084023  | 9.198367725   | 3.355671407  |
| O448 | -4.772965285  | 5.518386494   | 1.453567037  |
| O449 | -5.771930973  | 2.869947038   | 3.899141460  |
| O450 | -2.495064581  | 2.826597121   | 5.122890230  |
| O451 | -7.458007844  | 5.882912650   | 7.050811415  |
| O452 | -10.233727157 | 7.955937267   | 4.632915581  |
| O453 | -8.405026090  | 7.593702207   | 1.861252108  |
| O454 | -13.193093087 | 5.468261615   | 4.550358060  |
| O455 | -7.389929240  | 4.499509134   | -1.597441445 |
| O456 | 7.497837030   | 3.782953361   | -5.449926094 |
| O457 | 3.730650633   | 5.796242200   | -5.102163997 |
| O458 | 2.609128742   | 8.935229639   | -1.408189952 |
| O459 | 4.924605804   | 10.304433605  | 1.349600902  |
| O460 | 1.802932904   | 4.072529644   | -9.495980966 |



|                                                                                     |                                    |              |               |              |
|-------------------------------------------------------------------------------------|------------------------------------|--------------|---------------|--------------|
|                                                                                     | O461                               | 5.572442423  | -0.138310893  | -7.227894880 |
|                                                                                     | O462                               | 6.584423285  | 1.321182353   | -5.875570347 |
|                                                                                     | O463                               | -0.725384716 | 7.124706255   | -6.334803254 |
|                                                                                     | O464                               | 11.628752745 | 0.623801416   | 2.644648462  |
|                                                                                     | O465                               | 13.751142610 | -1.148248101  | 4.732581748  |
|                                                                                     | O466                               | 4.622067472  | -3.071710449  | -3.330241565 |
|                                                                                     | O467                               | 4.087789503  | -5.251526533  | -3.192481100 |
|                                                                                     | O468                               | 11.570704141 | -3.937709400  | -3.027959330 |
|                                                                                     | O469                               | 10.044123313 | -4.260129920  | -4.663292746 |
|                                                                                     | O470                               | 7.612545750  | -2.101382601  | 0.268996428  |
|                                                                                     | O471                               | 8.011124269  | -4.312567286  | 0.284431843  |
|                                                                                     | O472                               | 6.400517818  | -2.100285578  | -2.032914564 |
|                                                                                     | O473                               | 9.798233676  | -3.792068098  | 3.972181696  |
|                                                                                     | O474                               | 7.591104167  | -2.220869515  | 3.103401979  |
|                                                                                     | O475                               | -4.888112236 | 4.175805271   | -2.341100176 |
|                                                                                     | O476                               | 12.703249046 | -3.848198732  | -0.529537449 |
|                                                                                     | O477                               | 10.493823344 | -4.548084007  | 1.399505810  |
|                                                                                     | S478                               | 0.257862624  | 5.333825098   | 3.508320079  |
|                                                                                     | S479                               | 1.451514138  | 3.763343615   | 0.463959235  |
|                                                                                     | S480                               | 4.800278199  | 0.657855702   | -1.918923305 |
|                                                                                     | S481                               | 1.367958419  | 1.571447501   | 3.192789708  |
|                                                                                     | S482                               | 1.734884380  | 0.740280536   | -1.241576528 |
|                                                                                     | S483                               | 5.345137951  | 4.159313433   | -0.373709394 |
|                                                                                     | S484                               | 4.664743563  | -1.663626732  | 0.816844023  |
|                                                                                     | S485                               | 3.915248024  | 4.103009770   | 3.180801829  |
|                                                                                     | S486                               | 7.067415723  | 1.104645424   | 0.962837725  |
|                                                                                     | S487                               | 5.006718673  | 0.503117638   | 3.982106960  |
|                                                                                     | end                                |              |               |              |
| <b>Fe2-brNH2-Fe6-3b2</b><br><b>2N2 associated</b><br><b>35, S=1</b>                 |                                    |              |               |              |
| <b>Fe (139) -2.158</b>                                                              |                                    |              |               |              |
| <b>Fe (140) -0.018</b>                                                              |                                    |              |               |              |
| <b>Fe (141) -2.512</b>                                                              |                                    |              |               |              |
| <b>Fe (142) 2.538</b>                                                               |                                    |              |               |              |
| <b>Fe (143) 2.616</b>                                                               |                                    |              |               |              |
| <b>Fe (144) 2.153</b>                                                               |                                    |              |               |              |
| <b>Fe (145) -0.821</b>                                                              |                                    |              |               |              |
| 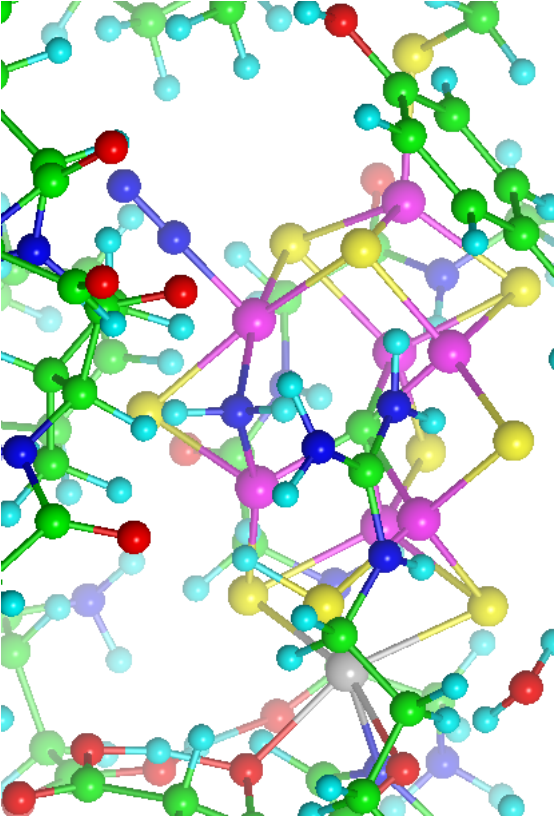 |                                    |              |               |              |
|                                                                                     | <b>fe2brnh2Fe63b22n2xdta.car_4</b> |              |               |              |
|                                                                                     | C1                                 | -7.910980374 | -5.031903361  | 1.570313873  |
|                                                                                     | C2                                 | -8.339946491 | -6.176837442  | 0.645822890  |
|                                                                                     | C3                                 | -8.625299489 | -2.992761976  | 2.740364150  |
|                                                                                     | C4                                 | -8.034734590 | -3.234015398  | 4.126633464  |
|                                                                                     | C5                                 | -7.721757996 | -4.775292173  | 5.997314038  |
|                                                                                     | C6                                 | -6.199063056 | -4.944155196  | 5.944221939  |
|                                                                                     | C7                                 | -4.235794865 | -5.395383186  | 4.559261426  |
|                                                                                     | C8                                 | -3.623490935 | -3.993191235  | 4.500383915  |
|                                                                                     | C9                                 | -3.892145589 | -1.687430624  | 3.716124895  |
|                                                                                     | C10                                | -3.800461058 | -1.025639787  | 5.100057820  |
|                                                                                     | C11                                | -4.788238971 | -0.696031701  | 7.288328737  |
|                                                                                     | C12                                | -3.764770781 | -1.311521941  | 8.254582610  |
|                                                                                     | C13                                | -3.007289579 | -3.353857443  | 9.378520656  |
|                                                                                     | C14                                | -1.576099576 | -3.754446938  | 8.996820055  |
|                                                                                     | C15                                | -0.102308511 | -4.574100577  | 7.204334743  |
|                                                                                     | C16                                | 0.695331880  | -3.494894275  | 6.466721501  |
|                                                                                     | C17                                | 0.627271784  | -1.424135794  | 5.166750900  |
|                                                                                     | C18                                | 0.988265091  | -0.182721266  | 5.995282675  |
|                                                                                     | C19                                | -0.105057992 | -1.096084758  | 3.845448155  |
|                                                                                     | C20                                | 0.546596993  | 0.093542079   | 3.131271393  |
|                                                                                     | C21                                | -0.131095425 | -2.330577782  | 2.937043044  |
|                                                                                     | C22                                | 0.191279795  | 1.741427202   | 7.3036067800 |
|                                                                                     | C23                                | 0.544521040  | 1.407721613   | 8.764842358  |
|                                                                                     | C24                                | -0.982024104 | 2.740471203   | 7.161503739  |
|                                                                                     | C25                                | -0.759146499 | 3.975991448   | 8.042872256  |
|                                                                                     | C26                                | -1.156511534 | 3.155129339   | 5.693882277  |
|                                                                                     | C27                                | 0.078999420  | 0.132710896   | 10.772163352 |
|                                                                                     | C28                                | 1.516394850  | -0.328725650  | 10.916378330 |
|                                                                                     | C29                                | 5.455362808  | -11.693447297 | 4.067163295  |
|                                                                                     | C30                                | 6.097786817  | -10.459529068 | 3.436118965  |
|                                                                                     | C31                                | 6.463101203  | -8.020140966  | 3.788897225  |
|                                                                                     | C32                                | 7.711017726  | -7.687311547  | 4.627708056  |
|                                                                                     | C33                                | 5.367320068  | -6.959876451  | 3.989931525  |
|                                                                                     | C34                                | 5.822307029  | -5.559498247  | 3.582044108  |
|                                                                                     | C35                                | 4.676705362  | -4.553515840  | 3.620727292  |
|                                                                                     | C36                                | 4.776278705  | -2.044547716  | 3.538613729  |
|                                                                                     | C37                                | 10.009251367 | -6.849161142  | 4.567035306  |
|                                                                                     | C38                                | 10.323837013 | -5.371481511  | 4.523674304  |
|                                                                                     | C39                                | -5.454495203 | -2.570450089  | -1.449620814 |
|                                                                                     | C40                                | -5.853330487 | -1.150324892  | -0.998977687 |
|                                                                                     | C41                                | -3.917764904 | -2.697186385  | -1.432976675 |
|                                                                                     | C42                                | -3.370692527 | -4.138647167  | -1.487408522 |
|                                                                                     | C43                                | -3.172838598 | -4.732872807  | -2.881529303 |
|                                                                                     | C44                                | -6.131067341 | 1.134488749   | -1.949086268 |
|                                                                                     | C45                                | -7.226979503 | 1.687668877   | -1.032215998 |
|                                                                                     | C46                                | -6.238063304 | 1.691041781   | -3.375889181 |
|                                                                                     | C47                                | -9.412702491 | 1.306797269   | 0.001479007  |
|                                                                                     | C48                                | -9.026462729 | 1.347634255   | 1.484632073  |
|                                                                                     | C49                                | -7.365854072 | 0.814004235   | 3.201693794  |
|                                                                                     | C50                                | -6.170158530 | 1.742170805   | 3.431525238  |
|                                                                                     | C51                                | -4.507864448 | 3.278382779   | 2.489317462  |
|                                                                                     | C52                                | -4.871533126 | 4.627682309   | 3.129025165  |

|      |               |              |              |
|------|---------------|--------------|--------------|
| C53  | -3.873415339  | 3.594539431  | 1.124244978  |
| C54  | -3.377430706  | 2.398246121  | 0.385306281  |
| C55  | -3.116044525  | 1.093935695  | 0.752264527  |
| C56  | -2.636856010  | 1.206492843  | -1.339097644 |
| C57  | -6.528197656  | 6.440766708  | 3.111062710  |
| C58  | -6.363843952  | 6.671786023  | 4.611241752  |
| C59  | -8.017117015  | 6.552937130  | 2.703809050  |
| C60  | -8.592886097  | 7.932320403  | 2.577530823  |
| C61  | -8.434822827  | 9.057877340  | 3.364083106  |
| C62  | -9.826925737  | 9.474719755  | 1.690785723  |
| C63  | 9.208369862   | 1.252728667  | 3.405775931  |
| C64  | 10.172629380  | 0.088136027  | 3.280613952  |
| C65  | 7.780231965   | 0.687229880  | 3.202739443  |
| C66  | 6.706432291   | 1.732373528  | 3.392235756  |
| C67  | 6.117354473   | 1.952658236  | 4.650300314  |
| C68  | 6.262895298   | 2.515996197  | 2.311184208  |
| C69  | 5.114148217   | 2.911065286  | 4.826572075  |
| C70  | 5.276092470   | 3.486958699  | 2.475686271  |
| C71  | 4.695945035   | 3.677458734  | 3.732350625  |
| C72  | 5.571562947   | 6.580718121  | -1.571692161 |
| C73  | 4.573387220   | 7.735154497  | -1.767958676 |
| C74  | 4.829049894   | 5.306318772  | -1.166619433 |
| C75  | 3.578190800   | 9.314945118  | -3.387135882 |
| C76  | 2.093376317   | 8.979321922  | -3.545989290 |
| C77  | 0.411775662   | 7.139859308  | -3.461292163 |
| C78  | -0.075914463  | 6.852314664  | -2.017823931 |
| C79  | 0.408407653   | 5.882179317  | -4.356621099 |
| C80  | -0.870614575  | 5.044173914  | -4.464407540 |
| C81  | -1.999346884  | 5.615657775  | -5.336270124 |
| C82  | -3.462053884  | 7.587568657  | -4.882069062 |
| C83  | 0.392708001   | 5.898353104  | 0.188414296  |
| C84  | 0.292312595   | 7.140800062  | 1.083218065  |
| C85  | 1.359452993   | 4.908560406  | 0.869586126  |
| C86  | 1.486052150   | 9.161711330  | 1.780793616  |
| C87  | 0.957380339   | 10.541705761 | 1.428854093  |
| C88  | -0.348083165  | 11.876877962 | -0.133815461 |
| C89  | -1.564958390  | 12.510776095 | 0.582095688  |
| C90  | -0.549295191  | 11.883787003 | -1.653598283 |
| C91  | -1.773136627  | 11.102905259 | -2.118429175 |
| C92  | -3.563966504  | 12.137585979 | 1.931556473  |
| C93  | -3.418031466  | 13.274045382 | 2.931605806  |
| C94  | -4.293641913  | 10.939057762 | 2.598352795  |
| C95  | -4.593755759  | 9.840982870  | 1.605146265  |
| C96  | -5.769211075  | 9.875674492  | 0.839982394  |
| C97  | -3.681230305  | 8.798923581  | 1.370778984  |
| C98  | -6.017934161  | 8.918551266  | -0.144975307 |
| C99  | -3.900573742  | 7.847272318  | 0.371520660  |
| C100 | -5.069212327  | 7.923393846  | -0.382288791 |
| C101 | 3.776133844   | -4.331294732 | -8.995771980 |
| C102 | 2.377440717   | -4.015214078 | -8.494896208 |
| C103 | 1.022326977   | -2.403361617 | -7.174777927 |
| C104 | 0.558980189   | -1.057580251 | -7.746717462 |
| C105 | 1.009448237   | 1.360013146  | -7.759678794 |
| C106 | 2.216760067   | 2.262800907  | -7.996876432 |
| C107 | 4.537595043   | 2.828660885  | -7.560719505 |
| C108 | 4.996008344   | 3.070764260  | -8.983946299 |
| C109 | -2.1963132554 | -3.665964945 | -9.095182238 |
| C110 | -3.936181609  | -2.513237499 | -8.820067201 |
| C111 | -2.508898931  | -4.308328975 | -7.764426707 |
| C112 | -1.868064977  | -5.688285179 | -8.003215313 |
| C113 | -1.188858462  | -6.187402131 | -6.747901954 |
| C114 | -4.220308451  | -0.156279834 | -8.240247323 |
| C115 | -3.620247220  | 1.076692871  | -8.886704846 |
| C116 | -4.675954427  | 0.042841522  | -6.772385882 |
| C117 | -3.473259925  | 0.063052587  | -5.876229200 |
| C118 | -2.747655540  | 1.249855628  | -5.681542921 |
| C119 | -2.950536064  | -1.146507280 | -5.390429976 |
| C120 | -1.474048375  | 1.203636060  | -5.108856567 |
| C121 | -1.679348117  | -1.188806030 | -4.816582737 |
| C122 | -0.920388437  | -0.017978517 | -4.722552403 |
| C123 | 7.580870027   | -6.712499616 | -4.708920392 |
| C124 | 8.767549277   | -6.829333927 | -3.737745137 |
| C125 | 6.255746459   | -6.940646562 | -3.965385439 |
| C126 | 5.000521123   | -6.668601761 | -4.731842326 |
| C127 | 4.581071243   | -7.282321037 | -5.894000720 |
| C128 | 2.947818674   | -6.007243067 | -5.116759746 |
| C129 | 9.930379188   | -8.060536064 | -2.004090697 |
| C130 | 11.287184461  | -7.898608418 | -2.651878937 |
| C131 | 0.396760223   | -6.844012132 | 0.025305991  |
| C132 | 1.888325118   | -6.988460355 | 0.316891012  |
| C133 | 2.779170025   | -7.199059850 | -0.943239745 |
| C134 | 2.626697019   | -8.657047931 | -1.455641521 |

|       |              |               |              |
|-------|--------------|---------------|--------------|
| C135  | 3.652504481  | -9.096252784  | -2.503743161 |
| C136  | 3.572460564  | -10.590084776 | -2.891029682 |
| C137  | 4.253612974  | -6.971724104  | -0.571770818 |
| C138  | 3.517900454  | -0.921468223  | -2.275801835 |
| Fe139 | 3.675378821  | -2.254763111  | -3.728183195 |
| Fe140 | 1.866769038  | 0.450751952   | -1.312505141 |
| Fe141 | 4.862748134  | 0.268518904   | -1.431240772 |
| Fe142 | 3.577605877  | 0.371097069   | -3.725469447 |
| Fe143 | 3.763649950  | 2.501342639   | -2.165533212 |
| Fe144 | 4.693656812  | -2.288977963  | -1.365333775 |
| Fe145 | 2.109411886  | -2.012488097  | -1.746321271 |
| H146  | -6.593566057 | -7.230300477  | 0.679079225  |
| H147  | -6.751424504 | -6.277816328  | -0.635393947 |
| H148  | -9.831470287 | -4.293580576  | 1.553417500  |
| H149  | -9.035896643 | -5.780370049  | -0.110513738 |
| H150  | -8.928451653 | -6.879095755  | 1.261553347  |
| H151  | -7.906265450 | -2.356974313  | 2.202405363  |
| H152  | -8.909147389 | -5.083991355  | 4.228801868  |
| H153  | -9.559412468 | -2.427159918  | 2.856531242  |
| H154  | -8.170659251 | -5.717606909  | 6.338420348  |
| H155  | -6.275343805 | -5.418179609  | 3.937254353  |
| H156  | -7.926227728 | -4.004346913  | 6.751775432  |
| H157  | -2.906023084 | -1.591693336  | 3.245634268  |
| H158  | -5.132670025 | -3.372783010  | 3.250558933  |
| H159  | -4.033440684 | -5.921957505  | 3.616930090  |
| H160  | -4.551762986 | 0.372277231   | 7.204594750  |
| H161  | -5.629072694 | -1.810283610  | 5.643719422  |
| H162  | -3.743219729 | -5.938598368  | 5.373839949  |
| H163  | -4.617344825 | -1.147901876  | 3.091637257  |
| H164  | -4.459422420 | -3.209659201  | 7.810500918  |
| H165  | -5.791101836 | -0.804888509  | 7.724347882  |
| H166  | -0.602223621 | -3.195412502  | 3.425090615  |
| H167  | -0.691046534 | -2.119731372  | 2.012610694  |
| H168  | 0.893235424  | -2.621483681  | 2.649366048  |
| H169  | -1.135614468 | -0.807109768  | 4.100609417  |
| H170  | -3.544232850 | -4.269646569  | 9.664991292  |
| H171  | -1.368563447 | 2.297145909   | 5.041155382  |
| H172  | -1.074555019 | 0.103158268   | 8.973284999  |
| H173  | -0.695223172 | 3.723471435   | 9.110981847  |
| H174  | 0.012295249  | 0.302621414   | 2.194672477  |
| H175  | 1.599979250  | -0.108651011  | 2.878871569  |
| H176  | 9.280228067  | 1.630939049   | 4.443324857  |
| H177  | -1.988369389 | 3.867411300   | 5.589628315  |
| H178  | -1.590354098 | 4.683658395   | 7.907354394  |
| H179  | -0.240633988 | 3.646469037   | 5.325366262  |
| H180  | 0.173776492  | 4.489143751   | 7.759205803  |
| H181  | -1.905826931 | 2.235199375   | 7.497688804  |
| H182  | 1.103512001  | 2.210367065   | 6.905997325  |
| H183  | -1.003127911 | 0.243329392   | 6.312220337  |
| H184  | 0.518649318  | 1.010657016   | 3.736963830  |
| H185  | 1.611713905  | 4.107959247   | 0.157945945  |
| H186  | 0.819963928  | 4.462784258   | 1.717012905  |
| H187  | 2.792365734  | 5.205706522   | 2.192448070  |
| H188  | 3.341143038  | 4.635611148   | 4.738373086  |
| H189  | 4.922944733  | 4.072098085   | 1.626065629  |
| H190  | 6.671047479  | 2.339491430   | 1.312972489  |
| H191  | 6.436018793  | 1.353870493   | 5.508325439  |
| H192  | -1.041725361 | -2.526280061  | 5.937362527  |
| H193  | -0.234078185 | -5.417649076  | 6.509626767  |
| H194  | 0.516366646  | -4.915313404  | 8.043174582  |
| H195  | -2.168839060 | -4.114721874  | 7.042380725  |
| H196  | -2.924729422 | -2.711126098  | 10.263852098 |
| H197  | 4.651667655  | 3.052890723   | 5.807242671  |
| H198  | 1.606162822  | -1.843259823  | 4.898315649  |
| H199  | -0.106764235 | 0.953106700   | 11.484058199 |
| H200  | -0.563753450 | -0.717091258  | 11.051429697 |
| H201  | 1.970320066  | -0.752347564  | 9.989567346  |
| H202  | 10.854725154 | -7.416078458  | 4.147608292  |
| H203  | -1.986199896 | -6.035042996  | -3.923066159 |
| H204  | 1.077170595  | -6.105322534  | -1.630138854 |
| H205  | -2.652419521 | -6.407712855  | -8.278313558 |
| H206  | -1.143371060 | -5.632971890  | -8.828675018 |
| H207  | -3.366046428 | -4.427768140  | -7.083207618 |
| H208  | -2.910466047 | 0.863898774   | -9.720692903 |
| H209  | -3.582986333 | -4.406403800  | -9.623982105 |
| H210  | -3.507781480 | -2.105924215  | -2.266377293 |
| H211  | -4.042765758 | -4.822998143  | -0.939752180 |
| H212  | -2.364006582 | -1.217731122  | -8.413606009 |
| H213  | -5.140870728 | -0.340130093  | -8.834174755 |
| H214  | -1.208569735 | -2.654056362  | -9.549920746 |
| H215  | -1.489588365 | -5.794891066  | -2.250942707 |
| H216  | -1.802062974 | -3.629453742  | -7.262747654 |

|      |               |              |               |
|------|---------------|--------------|---------------|
| H217 | -1.394642234  | -4.075798429 | -10.354539407 |
| H218 | -6.918069971  | -3.272324569 | -2.732350962  |
| H219 | -3.546023748  | -2.217815218 | -0.517440801  |
| H220 | 0.503232458   | -5.500243950 | -7.468873550  |
| H221 | -2.410206700  | -4.175205831 | -0.951611694  |
| H222 | -3.774872681  | 2.802348730  | 3.156017158   |
| H223 | -3.248192204  | 0.642763020  | 1.732098867   |
| H224 | -8.183079867  | 1.181238744  | 3.837943251   |
| H225 | -7.296293462  | 0.239599035  | 1.141029350   |
| H226 | -6.718781170  | 4.491973975  | 2.247283091   |
| H227 | -7.829344489  | 9.254270082  | 4.241066911   |
| H228 | -6.559021993  | 5.763018491  | 5.231001364   |
| H229 | -8.618656657  | 5.938520825  | 3.397688123   |
| H230 | -5.921794882  | 7.187108286  | 2.573223508   |
| H231 | -10.511593958 | 10.029492104 | 1.054855075   |
| H232 | -3.049475644  | 4.303658806  | 1.312434166   |
| H233 | -4.615467671  | 4.127512306  | 0.505681125   |
| H234 | -9.330998046  | 10.983257274 | 3.109906750   |
| H235 | -8.123805496  | 6.083111262  | 1.712851793   |
| H236 | -6.073328443  | 2.259106497  | 1.423108109   |
| H237 | -7.091195842  | -0.181328561 | 3.581746968   |
| H238 | -9.798233832  | 2.307982399  | -0.235837404  |
| H239 | -2.307973705  | 0.976599711  | -2.349894913  |
| H240 | -10.239072394 | 0.593977898  | -0.122271746  |
| H241 | 10.366169821  | 2.767628354  | 2.657002123   |
| H242 | 8.776266718   | 2.935278317  | 2.322624734   |
| H243 | 1.662942963   | 5.785164003  | -1.549985370  |
| H244 | -0.607723799  | 5.442631655  | 0.173358906   |
| H245 | 1.944933736   | 7.906318337  | 0.146359675   |
| H246 | -3.197609844  | 3.280847207  | -1.555701956  |
| H247 | -4.952618682  | 4.212615237  | -2.772074084  |
| H248 | -6.447561067  | 3.438019810  | -4.235743947  |
| H249 | -4.612322370  | 5.471279566  | -1.871532577  |
| H250 | -5.390951154  | 1.297535613  | -3.962682410  |
| H251 | -7.180969757  | 1.352207996  | -3.835293936  |
| H252 | 0.370168566   | 11.538544134 | -2.146570318  |
| H253 | -0.710307951  | 12.933288935 | -1.946624677  |
| H254 | -0.615385583  | 10.072751185 | -3.490164057  |
| H255 | -2.331333718  | 9.664028087  | -3.420500304  |
| H256 | -3.391708516  | 9.166142801  | -6.195534847  |
| H257 | -2.538318035  | 4.795841101  | -5.835121040  |
| H258 | -6.943425062  | 8.950290630  | -0.725727571  |
| H259 | -2.778442939  | 8.703891100  | 1.979776433   |
| H260 | -4.438372856  | 7.819889646  | -3.087141898  |
| H261 | 1.203578823   | 5.213129659  | -3.990869823  |
| H262 | 2.534104080   | 7.002063661  | -3.327399510  |
| H263 | -1.263416703  | 4.777950663  | -3.470989148  |
| H264 | -8.374413450  | 0.035466968  | -1.385092763  |
| H265 | 3.924115637   | 9.765747340  | -4.326975252  |
| H266 | -6.043906296  | -0.812035128 | -2.947653388  |
| H267 | 0.718069949   | 6.199345091  | -5.366797033  |
| H268 | -3.155351031  | 7.077530587  | 0.169119972   |
| H269 | 3.637284380   | 10.083614451 | -2.603197430  |
| H270 | -2.695585893  | 7.695306933  | -6.794755094  |
| H271 | -4.866183696  | 8.958904765  | -4.316159748  |
| H272 | -5.353429516  | -3.479205086 | -3.292092001  |
| H273 | -5.860476720  | -3.245183772 | -0.671200456  |
| H274 | -6.507999109  | 10.661495196 | 1.015497426   |
| H275 | -5.189464129  | 1.484658714  | -1.502189483  |
| H276 | -0.258580965  | 7.909368542  | -3.856762372  |
| H277 | -1.565896185  | 6.242538969  | -6.126841283  |
| H278 | -0.563677422  | 4.097488849  | -4.929418371  |
| H279 | -3.409227083  | 5.889433645  | -3.758951318  |
| H280 | 1.047990105   | 8.874563422  | 2.748622145   |
| H281 | -0.080888851  | 9.733598732  | -0.139140221  |
| H282 | 0.472147877   | 12.578742378 | 0.085329236   |
| H283 | 2.573416908   | 9.249982418  | 1.910280470   |
| H284 | -2.066622766  | 10.717893340 | 1.388313187   |
| H285 | 4.317701275   | -3.396745990 | -9.204560985  |
| H286 | 4.292933378   | -4.816356770 | -8.140448479  |
| H287 | 7.614644556   | -5.676011775 | -5.075251304  |
| H288 | 4.634575458   | -5.571376159 | -10.366535398 |
| H289 | 3.071743687   | -5.931471404 | -10.033082950 |
| H290 | 5.577512055   | 4.516419065  | -1.021689863  |
| H291 | 6.063695581   | 7.178842267  | 0.316678237   |
| H292 | 5.009918910   | 7.780234069  | -3.778417207  |
| H293 | 4.286668039   | 5.472273747  | -0.225860114  |
| H294 | 7.122703897   | 7.698628329  | -0.817907145  |
| H295 | 5.380958456   | 2.382364733  | -7.010682519  |
| H296 | 6.111430125   | 6.399808979  | -2.514130184  |
| H297 | 5.050891213   | -6.968581501 | 5.046652853   |
| H298 | 6.729618270   | -8.061859072 | 2.725487011   |

|       |              |               |              |
|-------|--------------|---------------|--------------|
| H299  | 3.538638545  | 1.050413653   | -6.924446486 |
| H300  | 4.943130403  | -0.043779653  | 3.151216155  |
| H301  | 0.441487472  | 1.309590420   | -8.696358087 |
| H302  | -1.271793767 | -2.130466312  | -4.442003619 |
| H303  | 0.370777237  | 1.881991794   | -7.026260847 |
| H304  | 4.310588412  | -4.434090585  | 4.647297230  |
| H305  | 1.948227108  | -0.171982507  | -6.550764496 |
| H306  | 3.832397633  | -4.912302897  | 3.007903144  |
| H307  | 4.504393433  | -7.267208613  | 3.378014710  |
| H308  | 6.230970176  | -5.585350638  | 2.560707401  |
| H309  | 6.627759094  | -5.203694349  | 4.243355714  |
| H310  | -5.357017734 | -0.782534332  | -6.518446775 |
| H311  | 5.505496087  | -9.467432415  | 5.070006011  |
| H312  | 4.551994236  | -11.900990614 | 3.473275760  |
| H313  | 0.079612036  | -0.051241776  | -4.293907349 |
| H314  | 5.845988037  | -11.775194856 | 6.087560501  |
| H315  | 4.286792963  | -12.105931481 | 5.710027980  |
| H316  | 5.508645406  | -3.299861043  | 2.143667709  |
| H317  | -0.898175014 | 2.117428884   | -4.960196298 |
| H318  | -3.534865666 | -2.064828405  | -5.481836596 |
| H319  | 7.221938327  | -10.277124376 | -1.434973375 |
| H320  | 6.219027626  | -7.990692902  | -3.629358521 |
| H321  | 6.311602527  | -8.413126844  | 0.081913512  |
| H322  | 6.322171667  | -10.893270126 | -2.546312631 |
| H323  | 4.750142118  | 2.251368659   | -9.701639539 |
| H324  | 6.261910399  | -5.285442157  | -0.247388551 |
| H325  | 2.036038254  | -7.799659145  | 1.039261679  |
| H326  | 3.091251851  | -2.313414301  | -7.610460053 |
| H327  | 2.712459309  | -9.314469464  | -0.575840991 |
| H328  | 2.673541040  | -7.163374093  | -6.857995826 |
| H329  | 1.968915168  | -5.552267778  | -5.034958292 |
| H330  | 6.148655767  | -12.533645662 | 3.890885448  |
| H331  | 5.356809057  | -1.065196436  | 1.797335278  |
| H332  | 8.187007153  | -6.079859369  | 0.817668431  |
| H333  | 7.170744659  | -4.026144861  | -0.253257954 |
| H334  | 8.697792461  | -7.098897080  | 2.882134088  |
| H335  | 3.950670491  | -2.672652421  | 5.318490674  |
| H336  | 3.505527021  | -8.512464102  | -3.425798130 |
| H337  | 4.671963140  | -8.889629122  | -2.150541849 |
| H338  | 1.607477375  | -8.783723443  | -1.851946591 |
| H339  | 1.187388608  | -2.331193264  | -6.088323548 |
| H340  | -3.167734404 | 2.198094831   | -6.025460172 |
| H341  | -5.241032078 | 0.986173564   | -6.731551436 |
| H342  | 2.191607663  | -6.048957989  | 0.808320272  |
| H343  | 8.226158521  | -7.635583934  | 0.707029410  |
| H344  | 7.042482989  | -9.517565690  | 0.881241643  |
| H345  | 3.773885073  | -1.001863033  | 5.017791297  |
| H346  | 5.081073170  | -7.996492746  | -6.537362369 |
| H347  | 6.250734995  | -6.333113498  | -3.053630510 |
| H348  | 0.243304064  | -3.142777894  | -7.372279520 |
| H349  | 4.302496313  | 3.795334137   | -7.088894381 |
| H350  | 7.638460906  | -0.132361632  | 3.923307071  |
| H351  | 7.715552339  | 0.258923237   | 2.189469346  |
| H352  | 8.605449776  | -7.396928344  | -6.349581832 |
| H353  | 7.781972405  | -8.576356719  | -5.568405664 |
| H354  | 9.892548591  | -9.073055326  | -1.572771079 |
| H355  | 8.139412374  | -8.686398186  | -2.973955904 |
| H356  | 11.320020639 | -8.166773190  | -3.735498599 |
| H357  | 9.826145028  | -7.344409823  | -1.173008980 |
| H358  | 10.425963890 | -0.187667936  | 2.228273674  |
| H359  | -2.408685888 | 13.373017180  | 3.395955857  |
| H360  | 9.914393434  | -7.124700298  | 5.632972564  |
| H361  | 9.436696320  | -4.697428116  | 4.436272197  |
| H362  | -4.182574245 | 12.507957125  | 1.096222621  |
| H363  | -3.675729951 | 10.556936420  | 3.426215059  |
| H364  | -5.225379611 | 11.325959447  | 3.036136236  |
| H365  | -6.203717832 | 6.989572455   | -1.657814946 |
| H366  | 2.847477935  | -1.004915810  | 0.596578293  |
| H367  | 2.460509633  | -3.269369428  | 0.350341834  |
| H368  | 1.185880149  | -1.204469187  | 0.553307938  |
| Mo369 | 3.669864488  | -4.571980104  | -2.325773531 |
| N370  | 2.021770586  | -1.049273234  | -0.010837070 |
| N371  | 0.676943530  | 1.495852739   | -0.459531848 |
| N372  | -0.055314882 | 2.150122896   | 0.091435524  |
| N373  | -7.270640017 | -6.903620251  | -0.014893540 |
| N374  | -8.912772510 | -4.200975478  | 1.980517596  |
| N375  | -8.322833633 | -4.415511369  | 4.722800123  |
| N376  | -5.677659649 | -5.368163224  | 4.765798296  |
| N377  | -4.304088524 | -3.082274453  | 3.766621204  |
| N378  | -4.798365517 | -1.310562559  | 5.969619338  |
| N379  | -3.788710099 | -2.666543618  | 8.361243662  |
| N380  | -1.398385617 | -4.165046242  | 7.712779959  |

|      |              |               |               |
|------|--------------|---------------|---------------|
| N381 | -0.024638266 | -2.463327425  | 5.949259013   |
| N382 | -0.042529217 | 0.526421618   | 6.522740909   |
| N383 | -0.236254485 | 0.499832504   | 9.403448843   |
| N384 | 5.075564664  | -11.502085076 | 5.473245013   |
| N385 | 5.958544164  | -9.331927709  | 4.160629374   |
| N386 | 5.119641429  | -3.259698224  | 3.088572675   |
| N387 | 4.262949361  | -1.869208088  | 4.776814389   |
| N388 | 4.934243259  | -0.974772328  | 2.741016638   |
| N389 | 8.760061351  | -7.197955983  | 3.920506423   |
| N390 | -5.994357686 | -2.837441874  | -2.790869286  |
| N391 | -2.150604850 | -5.601397102  | -3.009639186  |
| N392 | -6.116844207 | -0.317368432  | -2.044423427  |
| N393 | -8.351635412 | 0.940038785   | -0.919085970  |
| N394 | -7.870829206 | 0.725516018   | 1.843791560   |
| N395 | -5.665752065 | 2.399739797   | 2.350303734   |
| N396 | -3.063755127 | 2.454706192   | -0.961118496  |
| N397 | -2.661713453 | 0.361083962   | -0.319706505  |
| N398 | -6.102016556 | 5.089223919   | 2.792578020   |
| N399 | -9.466498044 | 8.206170925   | 1.536999352   |
| N400 | -9.224260476 | 10.027258829  | 2.781629504   |
| N401 | 9.531288498  | 2.246167569   | 2.378384305   |
| N402 | 6.563630136  | 6.890417375   | -0.530647368  |
| N403 | 4.447525526  | 8.204361030   | -3.045142877  |
| N404 | 1.771774240  | 7.672852087   | -3.472278990  |
| N405 | -2.974592834 | 6.391322095   | -4.563078000  |
| N406 | -3.206286500 | 8.177300234   | -6.064306010  |
| N407 | -4.196957981 | 8.274475528   | -3.973007977  |
| N408 | 0.792105721  | 6.211360635   | -1.185326695  |
| N409 | 1.195654716  | 8.126092015   | 0.807312988   |
| N410 | 0.065935184  | 10.590888876  | 0.393256830   |
| N411 | -1.573684103 | 10.311104311  | -3.205239790  |
| N412 | -2.261602424 | 11.715586887  | 1.433820539   |
| N413 | 3.715458949  | -5.153682768  | -10.205603624 |
| N414 | 2.248470350  | -2.853411046  | -7.821354094  |
| N415 | 1.275703354  | 0.003321359   | -7.318369821  |
| N416 | 3.419597825  | 1.902043932   | -7.483535809  |
| N417 | -1.899036932 | -3.251682517  | -10.020203185 |
| N418 | -3.382026582 | -1.315121732  | -8.482942306  |
| N419 | 7.719795780  | -7.601181894  | -5.877559448  |
| N420 | 3.962268940  | -5.858041851  | -4.264723336  |
| N421 | 3.292178637  | -6.851684129  | -6.114854028  |
| N422 | 8.850172862  | -7.949511945  | -2.968754798  |
| O423 | -6.741329085 | -4.887830313  | 1.971328549   |
| O424 | -7.323168635 | -2.368068703  | 4.664548008   |
| O425 | -5.506608259 | -4.723229246  | 6.951843060   |
| O426 | -2.573617268 | -3.708749575  | 5.104729659   |
| O427 | -2.858031747 | -0.272642096  | 5.393298058   |
| O428 | -3.004414712 | -0.594391976  | 8.926952308   |
| O429 | -0.679617286 | -3.751980569  | 9.852226076   |
| O430 | 1.926413662  | -3.611923818  | 6.347520600   |
| O431 | 2.181711783  | 0.148727048   | 6.132475915   |
| O432 | 1.515855104  | 1.938092444   | 9.331396127   |
| O433 | 2.126995684  | -0.307208792  | 11.974653891  |
| O434 | 6.664133287  | -10.549894221 | 2.327709476   |
| O435 | 7.714404563  | -7.849963296  | 5.861359957   |
| O436 | 11.456892642 | -4.922955360  | 4.602565925   |
| O437 | -5.930429012 | -0.812101605  | 0.196571867   |
| O438 | -3.927636499 | -4.454498861  | -3.841622336  |
| O439 | -7.067697712 | 2.759696813   | -0.423143658  |
| O440 | -6.204139233 | 3.131332584   | -3.344375604  |
| O441 | -9.775903043 | 1.931164833   | 2.282308991   |
| O442 | -5.705323460 | 1.865335024   | 4.572223773   |
| O443 | -4.073776902 | 5.275139874   | 3.817057861   |
| O444 | -6.111292878 | 7.751869131   | 5.119999360   |
| O445 | 10.636742345 | -0.527515802  | 4.229718480   |
| O446 | 3.696148393  | 4.626644433   | 3.830678071   |
| O447 | 3.925055032  | 8.217831995   | -0.824044799  |
| O448 | 1.276878356  | 9.903700369   | -3.730976543  |
| O449 | -1.208382695 | 7.212114167   | -1.661536665  |
| O450 | -0.513308377 | 7.187411023   | 2.021355251   |
| O451 | 2.550639593  | 5.566236007   | 1.315541079   |
| O452 | 1.312445173  | 11.542034535  | 2.064031686   |
| O453 | -1.842890261 | 13.706267955  | 0.407704640   |
| O454 | -2.875755000 | 11.229072193  | -1.566211828  |
| O455 | -4.343528161 | 14.007784026  | 3.244114583   |
| O456 | -5.256387497 | 6.993180140   | -1.419928974  |
| O457 | 1.434529613  | -4.823798391  | -8.674886965  |
| O458 | -0.384534850 | -0.976644081  | -8.561478074  |
| O459 | 2.059272622  | 3.332740286   | -8.609932292  |
| O460 | 5.626432105  | 4.056678866   | -9.329751742  |
| O461 | -5.166208258 | -2.679373449  | -8.883154758  |
| O462 | -1.786762660 | -6.731432920  | -5.826765623  |

|                                                                                     |                                     |              |               |              |
|-------------------------------------------------------------------------------------|-------------------------------------|--------------|---------------|--------------|
|                                                                                     | O463                                | 0.137937631  | -5.958539655  | -6.651056638 |
|                                                                                     | O464                                | -3.911628319 | 2.224660593   | -8.584050115 |
|                                                                                     | O465                                | 9.652772444  | -5.953621259  | -3.682598085 |
|                                                                                     | O466                                | 12.298423294 | -7.576143849  | -2.043956208 |
|                                                                                     | O467                                | 0.104584003  | -6.231420810  | -1.124717935 |
|                                                                                     | O468                                | -0.471726028 | -7.211747030  | 0.817227616  |
|                                                                                     | O469                                | 4.682543432  | -11.209679622 | -3.052962770 |
|                                                                                     | O470                                | 2.423089753  | -11.089931227 | -3.053576424 |
|                                                                                     | O471                                | 4.895330083  | -6.060065094  | -1.254072853 |
|                                                                                     | O472                                | 4.783434903  | -7.666391033  | 0.318189453  |
|                                                                                     | O473                                | 2.386125222  | -6.241169187  | -1.930494804 |
|                                                                                     | O474                                | 8.711602670  | -6.865022441  | 1.113552233  |
|                                                                                     | O475                                | 6.933004370  | -4.797556585  | 0.294393693  |
|                                                                                     | O476                                | -4.225424781 | 4.832581291   | -2.508886542 |
|                                                                                     | O477                                | 7.281324390  | -10.809479637 | -2.259351261 |
|                                                                                     | O478                                | 7.167533002  | -8.923540345  | 0.098882174  |
|                                                                                     | S479                                | 3.602884760  | 4.749973713   | -2.437599021 |
|                                                                                     | S480                                | 1.900774839  | 1.805718527   | -3.238027129 |
|                                                                                     | S481                                | 1.832772127  | -3.504781677  | -3.369453286 |
|                                                                                     | S482                                | 3.594358140  | 1.578242262   | -0.157978405 |
|                                                                                     | S483                                | 0.248810357  | -1.017607440  | -2.023603544 |
|                                                                                     | S484                                | 3.862699077  | -0.930405780  | -5.515772998 |
|                                                                                     | S485                                | 3.674262196  | -3.819813198  | 0.055308491  |
|                                                                                     | S486                                | 5.483865844  | 1.477647141   | -3.207646174 |
|                                                                                     | S487                                | 5.537541263  | -3.350340642  | -3.127614635 |
|                                                                                     | S488                                | 6.205200682  | -1.072245151  | -0.309346942 |
|                                                                                     | end                                 |              |               |              |
| <b>Fe2-brNH2-Fe6-3b2</b><br><b>2N2 dissociated</b><br><b>35, S=1</b>                |                                     |              |               |              |
| <b>Fe( 139) -2.199</b>                                                              |                                     |              |               |              |
| <b>Fe( 140) -0.915</b>                                                              |                                     |              |               |              |
| <b>Fe( 141) -2.351</b>                                                              |                                     |              |               |              |
| <b>Fe( 142) 2.796</b>                                                               |                                     |              |               |              |
| <b>Fe( 143) 2.817</b>                                                               |                                     |              |               |              |
| <b>Fe( 144) 2.302</b>                                                               |                                     |              |               |              |
| <b>Fe( 145) -0.801</b>                                                              |                                     |              |               |              |
| 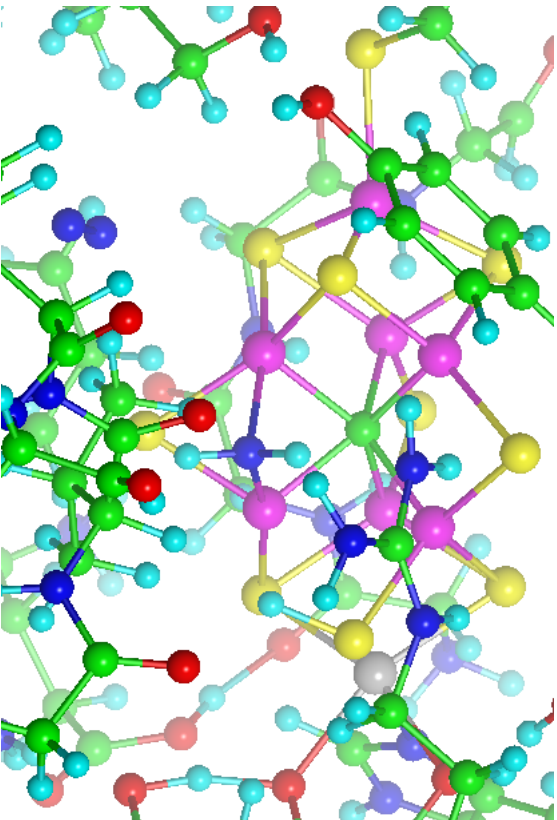 |                                     |              |               |              |
|                                                                                     | <b>fe2brnh2Fe63b22n2xdtdb.car_3</b> |              |               |              |
|                                                                                     | C1                                  | -7.903842839 | -5.030651174  | 1.566443656  |
|                                                                                     | C2                                  | -8.334280096 | -6.176189270  | 0.643914190  |
|                                                                                     | C3                                  | -8.621772462 | -2.993715581  | 2.738733497  |
|                                                                                     | C4                                  | -8.032215686 | -3.235570945  | 4.125543674  |
|                                                                                     | C5                                  | -7.719985507 | -4.777158132  | 5.995829548  |
|                                                                                     | C6                                  | -6.197386370 | -4.946055204  | 5.942906769  |
|                                                                                     | C7                                  | -4.234114654 | -5.397365426  | 4.557844915  |
|                                                                                     | C8                                  | -3.622210433 | -3.995121522  | 4.499268346  |
|                                                                                     | C9                                  | -3.890651838 | -1.689563648  | 3.715186408  |
|                                                                                     | C10                                 | -3.798613872 | -1.027414743  | 5.098983743  |
|                                                                                     | C11                                 | -4.786469687 | -0.697704292  | 7.287327791  |
|                                                                                     | C12                                 | -3.763013121 | -1.313098497  | 8.253692503  |
|                                                                                     | C13                                 | -3.004940726 | -3.355605715  | 9.377175460  |
|                                                                                     | C14                                 | -1.573681059 | -3.755712929  | 8.995068471  |
|                                                                                     | C15                                 | -0.100019152 | -4.574224420  | 7.201965339  |
|                                                                                     | C16                                 | 0.696736004  | -3.495064862  | 6.463982074  |
|                                                                                     | C17                                 | 0.628936470  | -1.425863801  | 5.162945485  |
|                                                                                     | C18                                 | 0.989266838  | -0.183145066  | 5.990172913  |
|                                                                                     | C19                                 | -0.100939773 | -1.100681944  | 3.840889741  |
|                                                                                     | C20                                 | 0.557387156  | 0.083085005   | 3.124528953  |
|                                                                                     | C21                                 | -0.128041581 | -2.335037696  | 2.932464101  |
|                                                                                     | C22                                 | 0.192984468  | 1.739385886   | 7.301441967  |
|                                                                                     | C23                                 | 0.546129488  | 1.405550651   | 8.762663180  |
|                                                                                     | C24                                 | -0.980098776 | 2.738869667   | 7.159783524  |
|                                                                                     | C25                                 | -0.757228342 | 3.974227119   | 8.041632057  |
|                                                                                     | C26                                 | -1.154540508 | 3.153999676   | 5.692271133  |
|                                                                                     | C27                                 | 0.080977171  | 0.130999586   | 10.770413660 |
|                                                                                     | C28                                 | 1.518438017  | -0.330328208  | 10.914924960 |
|                                                                                     | C29                                 | 5.455789228  | -11.692923274 | 4.064763577  |
|                                                                                     | C30                                 | 6.099478962  | -10.459855129 | 3.434299521  |
|                                                                                     | C31                                 | 6.465349655  | -8.021059833  | 3.787749717  |
|                                                                                     | C32                                 | 7.713063266  | -7.688884219  | 4.626882413  |
|                                                                                     | C33                                 | 5.369300205  | -6.961433526  | 3.988631971  |
|                                                                                     | C34                                 | 5.823980170  | -5.561315145  | 3.580467846  |
|                                                                                     | C35                                 | 4.678184436  | -4.555816292  | 3.618197983  |
|                                                                                     | C36                                 | 4.779589993  | -2.047941541  | 3.539647579  |
|                                                                                     | C37                                 | 10.011465152 | -6.851640371  | 4.566586643  |
|                                                                                     | C38                                 | 10.326018884 | -5.374052599  | 4.523091075  |
|                                                                                     | C39                                 | -5.446666633 | -2.569998970  | -1.452234441 |
|                                                                                     | C40                                 | -5.849331891 | -1.151075960  | -1.002245448 |
|                                                                                     | C41                                 | -3.909842922 | -2.697760616  | -1.435391011 |
|                                                                                     | C42                                 | -3.366481770 | -4.140402564  | -1.489191313 |
|                                                                                     | C43                                 | -3.169960267 | -4.734946540  | -2.883437112 |
|                                                                                     | C44                                 | -6.136320536 | 1.131523706   | -1.952984548 |
|                                                                                     | C45                                 | -7.231827163 | 1.683650154   | -1.034988501 |
|                                                                                     | C46                                 | -6.240868855 | 1.689225060   | -3.379573712 |
|                                                                                     | C47                                 | -9.415534124 | 1.303322308   | 0.002196698  |
|                                                                                     | C48                                 | -9.030269666 | 1.344001007   | 1.485698390  |
|                                                                                     | C49                                 | -7.373785466 | 0.805728571   | 3.205465572  |
|                                                                                     | C50                                 | -6.180105886 | 1.735692868   | 3.435312964  |
|                                                                                     | C51                                 | -4.521036759 | 3.270203930   | 2.482625213  |
|                                                                                     | C52                                 | -4.873369149 | 4.620218855   | 3.125046955  |
|                                                                                     | C53                                 | -3.905142242 | 3.584901920   | 1.109909464  |

|      |              |              |              |
|------|--------------|--------------|--------------|
| C54  | -3.424408666 | 2.385165934  | 0.368211887  |
| C55  | -3.168125826 | 1.078447447  | 0.737597030  |
| C56  | -2.646486442 | 1.197340711  | -1.342278419 |
| C57  | -6.523579402 | 6.440409687  | 3.108229679  |
| C58  | -6.359562195 | 6.671840059  | 4.607959751  |
| C59  | -8.012415385 | 6.553165843  | 2.701675588  |
| C60  | -8.588905142 | 7.932190578  | 2.575676490  |
| C61  | -8.432598483 | 9.057430004  | 3.363059535  |
| C62  | -9.824840109 | 9.473694133  | 1.689696349  |
| C63  | 9.212253832  | 1.253064093  | 3.409085172  |
| C64  | 10.175651683 | 0.087769561  | 3.282449475  |
| C65  | 7.784726845  | 0.686462563  | 3.203277142  |
| C66  | 6.708605462  | 1.729952058  | 3.389474879  |
| C67  | 6.119247297  | 1.952060658  | 4.647136426  |
| C68  | 6.262511432  | 2.509796910  | 2.306485212  |
| C69  | 5.115015409  | 2.909753052  | 4.822303441  |
| C70  | 5.274393492  | 3.479809539  | 2.469694835  |
| C71  | 4.695574565  | 3.673450629  | 3.726725572  |
| C72  | 5.578673742  | 6.583556966  | -1.575118956 |
| C73  | 4.579860934  | 7.738166109  | -1.770290549 |
| C74  | 4.831280911  | 5.308132175  | -1.183625846 |
| C75  | 3.580957458  | 9.315608386  | -3.389130505 |
| C76  | 2.096227506  | 8.978757732  | -3.548844553 |
| C77  | 0.414112737  | 7.140219909  | -3.463333321 |
| C78  | -0.066496390 | 6.850474385  | -2.017788113 |
| C79  | 0.409720795  | 5.880783026  | -4.357705392 |
| C80  | -0.868334582 | 5.041174161  | -4.465107020 |
| C81  | -1.997924921 | 5.613023613  | -5.336167331 |
| C82  | -3.460417467 | 7.585555055  | -4.882107976 |
| C83  | 0.419713662  | 5.905761804  | 0.188004125  |
| C84  | 0.307844614  | 7.149177677  | 1.079917839  |
| C85  | 1.403546824  | 4.934197200  | 0.872996527  |
| C86  | 1.494088890  | 9.170595288  | 1.782298683  |
| C87  | 0.961670726  | 10.548806217 | 1.429920528  |
| C88  | -0.346672294 | 11.877506674 | -0.134974578 |
| C89  | -1.563821501 | 12.509958933 | 0.581121516  |
| C90  | -0.547940640 | 11.881482770 | -1.654549551 |
| C91  | -1.771558508 | 11.100104366 | -2.118971372 |
| C92  | -3.563167448 | 12.136290103 | 1.930711043  |
| C93  | -3.416420567 | 13.272379264 | 2.930651527  |
| C94  | -4.292084556 | 10.936612868 | 2.596898466  |
| C95  | -4.591433682 | 9.838259808  | 1.603503026  |
| C96  | -5.766812197 | 9.872137063  | 0.838073709  |
| C97  | -3.678798054 | 8.796053645  | 1.369808232  |
| C98  | -6.015213180 | 8.914576801  | -0.146600897 |
| C99  | -3.897928435 | 7.843953921  | 0.370835626  |
| C100 | -5.066360572 | 7.919473251  | -0.383354084 |
| C101 | 3.777557004  | -4.331818001 | -8.995687439 |
| C102 | 2.378571288  | -4.015937448 | -8.496447421 |
| C103 | 1.022282405  | -2.404031400 | -7.178757995 |
| C104 | 0.559347370  | -1.057816729 | -7.747984091 |
| C105 | 1.010690850  | 1.358409814  | -7.761030240 |
| C106 | 2.216885731  | 2.262224699  | -7.997965757 |
| C107 | 4.538035125  | 2.829075734  | -7.564791625 |
| C108 | 4.997969077  | 3.070837530  | -8.987845242 |
| C109 | -2.958329768 | -3.665783407 | -9.092825233 |
| C110 | -3.931828803 | -2.513469584 | -8.818509587 |
| C111 | -2.505015951 | -4.309086691 | -7.762751362 |
| C112 | -1.865861757 | -5.689491077 | -8.003814538 |
| C113 | -1.186530953 | -6.189471069 | -6.749202082 |
| C114 | -4.215320694 | -0.157028565 | -8.238518270 |
| C115 | -3.616780717 | 1.075880170  | -8.885475368 |
| C116 | -4.670976179 | 0.040352958  | -6.770706217 |
| C117 | -3.469603408 | 0.057179519  | -5.872602949 |
| C118 | -2.741567873 | 1.242542063  | -5.677266599 |
| C119 | -2.951837533 | -1.153338380 | -5.384194326 |
| C120 | -1.471438229 | 1.193960955  | -5.097337171 |
| C121 | -1.684314011 | -1.197885285 | -4.801750782 |
| C122 | -0.924025402 | -0.028586041 | -4.704117086 |
| C123 | 7.581275887  | -6.715086995 | -4.709046506 |
| C124 | 8.767895546  | -6.831664867 | -3.738098142 |
| C125 | 6.255425566  | -6.946423772 | -3.967616118 |
| C126 | 5.001173512  | -6.678175032 | -4.737119467 |
| C127 | 4.585971249  | -7.292363571 | -5.901196928 |
| C128 | 2.949805705  | -6.018490827 | -5.127423152 |
| C129 | 9.932081744  | -8.063344776 | -2.006306786 |
| C130 | 11.289149973 | -7.900660317 | -2.654196062 |
| C131 | 0.395366145  | -6.848269348 | 0.023500439  |
| C132 | 1.886356526  | -6.994650643 | 0.314777974  |
| C133 | 2.779236330  | -7.209293066 | -0.944908867 |
| C134 | 2.628056353  | -8.668130728 | -1.454639043 |
| C135 | 3.654222065  | -9.102884649 | -2.504122121 |



|       |              |               |               |
|-------|--------------|---------------|---------------|
| C136  | 3.575771819  | -10.595281502 | -2.894236722  |
| C137  | 4.254251810  | -6.982196061  | -0.569886243  |
| C138  | 3.525479958  | -0.918964618  | -2.277020198  |
| Fe139 | 3.666883029  | -2.277450060  | -3.729267124  |
| Fe140 | 2.141646447  | 0.309071960   | -1.528254748  |
| Fe141 | 4.818385950  | 0.289092926   | -1.385098223  |
| Fe142 | 3.702103721  | 0.349385466   | -3.775800424  |
| Fe143 | 3.714857550  | 2.519523217   | -2.188406601  |
| Fe144 | 4.686293798  | -2.300491970  | -1.366179984  |
| Fe145 | 2.093422240  | -2.059871147  | -1.769168130  |
| H146  | -6.589807462 | -7.232744112  | 0.676505406   |
| H147  | -6.747517949 | -6.281001428  | -0.638835867  |
| H148  | -9.825570205 | -4.296292168  | 1.551878433   |
| H149  | -9.031138965 | -5.779909435  | -0.111732452  |
| H150  | -8.922734064 | -6.876621638  | 1.261467820   |
| H151  | -7.903303085 | -2.356208295  | 2.202245883   |
| H152  | -8.906719664 | -5.085802001  | 4.226810693   |
| H153  | -9.556762207 | -2.429451714  | 2.854379861   |
| H154  | -8.168962165 | -5.719401007  | 6.336826637   |
| H155  | -6.273687904 | -5.420562426  | 3.936140199   |
| H156  | -7.924663392 | -4.006351608  | 6.750340672   |
| H157  | -2.904471104 | -1.593923835  | 3.244671086   |
| H158  | -5.130632866 | -3.375020914  | 3.248225513   |
| H159  | -4.031886288 | -5.923723036  | 3.615390055   |
| H160  | -4.550060480 | 0.370570437   | 7.203672046   |
| H161  | -5.626605513 | -1.812911514  | 5.643125811   |
| H162  | -3.741453388 | -5.940691482  | 5.372266110   |
| H163  | -4.616311898 | -1.150023516  | 3.091220071   |
| H164  | -4.457475446 | -3.211359696  | 7.809417613   |
| H165  | -5.789359702 | -0.806564469  | 7.723209019   |
| H166  | -0.599034947 | -3.200297027  | 3.419795941   |
| H167  | -0.687688589 | -2.121673623  | 2.008467973   |
| H168  | 0.895995973  | -2.623628091  | 2.641773142   |
| H169  | -1.131163181 | -0.807302784  | 4.093285833   |
| H170  | -3.541702162 | -4.271594567  | 9.663502421   |
| H171  | -1.366421628 | 2.296125947   | 5.039375574   |
| H172  | -1.072790331 | 0.100983702   | 8.971742558   |
| H173  | -0.693399360 | 3.721431499   | 9.109737141   |
| H174  | 0.033519223  | 0.278636964   | 2.179868321   |
| H175  | 1.613648888  | -0.119530935  | 2.885676833   |
| H176  | 9.283730810  | 1.631283005   | 4.446828352   |
| H177  | -1.986463524 | 3.866207573   | 5.587990710   |
| H178  | -1.588501966 | 4.681981104   | 7.906323814   |
| H179  | -0.238696755 | 3.645336871   | 5.323770941   |
| H180  | 0.175741050  | 4.487537825   | 7.758251953   |
| H181  | -1.904037909 | 2.233795440   | 7.495942525   |
| H182  | 1.105311270  | 2.208447815   | 6.904124714   |
| H183  | -1.001803444 | 0.241750505   | 6.309931519   |
| H184  | 0.518855346  | 1.007282730   | 3.718627422   |
| H185  | 1.659451077  | 4.123024445   | 0.172529670   |
| H186  | 0.875995524  | 4.496839596   | 1.731786165   |
| H187  | 2.839753467  | 5.249683646   | 2.180616072   |
| H188  | 3.342762152  | 4.636548521   | 4.731701217   |
| H189  | 4.921572310  | 4.064505530   | 1.619459552   |
| H190  | 6.670340019  | 2.332445622   | 1.308311546   |
| H191  | 6.438530314  | 1.354760031   | 5.505952834   |
| H192  | -1.040415797 | -2.527242049  | 5.933756388   |
| H193  | -0.231918195 | -5.417859053  | 6.507412258   |
| H194  | 0.518968833  | -4.915052945  | 8.040760836   |
| H195  | -2.166738056 | -4.115099736  | 7.040738718   |
| H196  | -2.922598019 | -2.713015822  | 10.262677019  |
| H197  | 4.653033959  | 3.052542243   | 5.803178065   |
| H198  | 1.608252413  | -1.845228460  | 4.896248242   |
| H199  | -0.104786513 | 0.951522301   | 11.482170401  |
| H200  | -0.561651114 | -0.718785011  | 11.050018599  |
| H201  | 1.972522648  | -0.753994503  | 9.988222415   |
| H202  | 10.857287926 | -7.418701433  | 4.147743446   |
| H203  | -1.983328283 | -6.036962272  | -3.925658059  |
| H204  | 1.073603131  | -6.113398740  | -1.633985886  |
| H205  | -2.651324623 | -6.407635242  | -8.279396021  |
| H206  | -1.141606769 | -5.633698426  | -8.829677678  |
| H207  | -3.362800166 | -4.429025973  | -7.082450240  |
| H208  | -2.908600757 | 0.863491492   | -9.720750113  |
| H209  | -3.577866343 | -4.406636070  | -9.621545787  |
| H210  | -3.498794523 | -2.106654406  | -2.268577554  |
| H211  | -4.040741220 | -4.822425813  | -0.941435792  |
| H212  | -2.359269963 | -1.218623697  | -8.413225550  |
| H213  | -5.135680603 | -0.340798101  | -8.831810006  |
| H214  | -1.203953438 | -2.654112632  | -9.550603160  |
| H215  | -1.487060375 | -5.797443475  | -2.252859807  |
| H216  | -1.797716514 | -3.632170174  | -7.259171092  |
| H217  | -1.391646176 | -4.076295069  | -10.354834440 |

|      |               |              |               |
|------|---------------|--------------|---------------|
| H218 | -6.911687854  | -3.272623486 | -2.732272271  |
| H219 | -3.538816997  | -2.219412369 | -0.519103326  |
| H220 | 0.505453328   | -5.501408942 | -7.470137030  |
| H221 | -2.406469561  | -4.179491005 | -0.952874173  |
| H222 | -3.781195241  | 2.793447757  | 3.140971415   |
| H223 | -3.305123662  | 0.629833215  | 1.717838512   |
| H224 | -8.191914221  | 1.170895664  | 3.841579297   |
| H225 | -7.301557840  | 0.233245070  | 1.143962143   |
| H226 | -6.724091685  | 4.491282436  | 2.250162595   |
| H227 | -7.827881826  | 9.254144737  | 4.240429499   |
| H228 | -6.556485778  | 5.763720438  | 5.227670388   |
| H229 | -8.613341496  | 5.939052659  | 3.396269990   |
| H230 | -5.916123869  | 7.184892789  | 2.569108785   |
| H231 | -10.510368949 | 10.027775728 | 1.053912234   |
| H232 | -3.076621266  | 4.292466655  | 1.285815637   |
| H233 | -4.654299189  | 4.116714416  | 0.499574234   |
| H234 | -9.331147592  | 10.981967703 | 3.109725050   |
| H235 | -8.119569619  | 6.083095473  | 1.710710226   |
| H236 | -6.095127414  | 2.256329842  | 1.427486110   |
| H237 | -7.097241218  | -0.189443150 | 3.584388916   |
| H238 | -9.799579307  | 2.304984878  | -0.235273000  |
| H239 | -2.305317478  | 0.968107893  | -2.348799006  |
| H240 | -10.242807031 | 0.591598396  | -0.121156434  |
| H241 | 10.369216414  | 2.767800099  | 2.657185853   |
| H242 | 8.778644928   | 2.933645889  | 2.323185193   |
| H243 | 1.681282960   | 5.793706635  | -1.556861470  |
| H244 | -0.577417665  | 5.442101504  | 0.180002374   |
| H245 | 1.961963465   | 7.916987361  | 0.149652944   |
| H246 | -3.207589361  | 3.272541880  | -1.566205656  |
| H247 | -4.954303351  | 4.213843086  | -2.777783715  |
| H248 | -6.448423681  | 3.436558681  | -4.239566316  |
| H249 | -4.608298947  | 5.469368953  | -1.873954741  |
| H250 | -5.393595972  | 1.294793215  | -3.965512689  |
| H251 | -7.183679350  | 1.352653518  | -3.840615856  |
| H252 | 0.371636758   | 11.535656743 | -2.146887645  |
| H253 | -0.708998356  | 12.930382802 | -1.949364148  |
| H254 | -0.613789555  | 10.070747980 | -3.491789165  |
| H255 | -2.330512948  | 9.662709967  | -3.422722017  |
| H256 | -3.390372252  | 9.163163589  | -6.196385249  |
| H257 | -2.536967025  | 4.793266715  | -5.835194439  |
| H258 | -6.940564546  | 8.946254103  | -0.727529093  |
| H259 | -2.776006010  | 8.701196686  | 1.978861178   |
| H260 | -4.436843733  | 7.817889574  | -3.087430702  |
| H261 | 1.206205793   | 5.213761875  | -3.991397615  |
| H262 | 2.536441860   | 6.999870379  | -3.331734724  |
| H263 | -1.261210633  | 4.773997750  | -3.471920293  |
| H264 | -8.379026958  | 0.030556420  | -1.384335387  |
| H265 | 3.926639302   | 9.767586362  | -4.328419624  |
| H266 | -6.044218877  | -0.815480246 | -2.951038299  |
| H267 | 0.719169240   | 6.196144822  | -5.368404612  |
| H268 | -3.152346675  | 7.074474192  | 0.168746626   |
| H269 | 3.638174630   | 10.083772729 | -2.604572096  |
| H270 | -2.694240515  | 7.691863186  | -6.794747519  |
| H271 | -4.863693688  | 8.957421778  | -4.316292963  |
| H272 | -5.347956787  | -3.480940103 | -3.294132490  |
| H273 | -5.851324146  | -3.245181478 | -0.673905815  |
| H274 | -6.505956470  | 10.657744603 | 1.013176189   |
| H275 | -5.196208036  | 1.483527226  | -1.505624403  |
| H276 | -0.258416922  | 7.908748054  | -3.856318113  |
| H277 | -1.564098828  | 6.240116941  | -6.126308984  |
| H278 | -0.561416770  | 4.094997060  | -4.931629455  |
| H279 | -3.407807568  | 5.886738943  | -3.759194461  |
| H280 | 1.054026743   | 8.880500181  | 2.748443607   |
| H281 | -0.072171346  | 9.735201786  | -0.137964916  |
| H282 | 0.472141121   | 12.581317939 | 0.082789473   |
| H283 | 2.580865735   | 9.261022214  | 1.914929720   |
| H284 | -2.064580006  | 10.716496600 | 1.387520707   |
| H285 | 4.318362958   | -3.397272394 | -9.205201552  |
| H286 | 4.294396503   | -4.816927522 | -8.140810234  |
| H287 | 7.612995252   | -5.677916935 | -5.073687153  |
| H288 | 4.635236652   | -5.572276591 | -10.368065196 |
| H289 | 3.072311382   | -5.931845322 | -10.033173279 |
| H290 | 5.572537637   | 4.509999314  | -1.047496358  |
| H291 | 6.065043177   | 7.178037310  | 0.317086038   |
| H292 | 5.010222539   | 7.778487375  | -3.781298795  |
| H293 | 4.289029305   | 5.469125518  | -0.241962312  |
| H294 | 7.128091154   | 7.696514200  | -0.813778233  |
| H295 | 5.382071411   | 2.383765673  | -7.015027721  |
| H296 | 6.122786425   | 6.407487433  | -2.516045010  |
| H297 | 5.052933868   | -6.970364838 | 5.045350335   |
| H298 | 6.732134739   | -8.062833520 | 2.724448951   |
| H299 | 3.541001737   | 1.049730315  | -6.929040226  |

|       |              |               |              |
|-------|--------------|---------------|--------------|
| H300  | 4.944807783  | -0.046355955  | 3.156179041  |
| H301  | 0.443692396  | 1.307220266   | -8.698322675 |
| H302  | -1.279719120 | -2.140047570  | -4.425378300 |
| H303  | 0.370909976  | 1.880227535   | -7.028636929 |
| H304  | 4.312005912  | -4.435678856  | 4.644638386  |
| H305  | 1.955927581  | -0.176564454  | -6.559144992 |
| H306  | 3.833951028  | -4.915268019  | 3.005769341  |
| H307  | 4.506594779  | -7.269317160  | 3.376744595  |
| H308  | 6.233102163  | -5.587272884  | 2.559315612  |
| H309  | 6.629061645  | -5.205200937  | 4.242121243  |
| H310  | -5.353602569 | -0.784318122  | -6.518452104 |
| H311  | 5.506864469  | -9.467868350  | 5.068451736  |
| H312  | 4.552425860  | -11.900221867 | 3.470968711  |
| H313  | 0.073176154  | -0.061862013  | -4.269591651 |
| H314  | 5.847881358  | -11.775884430 | 6.084878269  |
| H315  | 4.288434975  | -12.107027866 | 5.707994772  |
| H316  | 5.506390610  | -3.300569114  | 2.139426335  |
| H317  | -0.892659633 | 2.105921287   | -4.948383664 |
| H318  | -3.536742764 | -2.070731028  | -5.480267034 |
| H319  | 7.222326290  | -10.277714815 | -1.435213905 |
| H320  | 6.221279999  | -7.996066618  | -3.629497157 |
| H321  | 6.311390905  | -8.415025701  | 0.081224637  |
| H322  | 6.323581425  | -10.894254040 | -2.547772055 |
| H323  | 4.753060141  | 2.250595698   | -9.705231851 |
| H324  | 6.259436812  | -5.287450542  | -0.245011147 |
| H325  | 2.035058462  | -7.804042551  | 1.039935302  |
| H326  | 3.090921335  | -2.316094579  | -7.603746375 |
| H327  | 2.716586870  | -9.324617277  | -0.573973775 |
| H328  | 2.681251840  | -7.173617597  | -6.871986808 |
| H329  | 1.970678645  | -5.564477830  | -5.048311415 |
| H330  | 6.148593339  | -12.533406716 | 3.888691108  |
| H331  | 5.357279008  | -1.066677663  | 1.798147443  |
| H332  | 8.187932601  | -6.082696726  | 0.816667754  |
| H333  | 7.170697224  | -4.029970810  | -0.254905220 |
| H334  | 8.700343475  | -7.101358256  | 2.881321172  |
| H335  | 3.950086289  | -2.677665454  | 5.317456450  |
| H336  | 3.505556597  | -8.516696370  | -3.424492996 |
| H337  | 4.673363165  | -8.894940006  | -2.150667648 |
| H338  | 1.608885023  | -8.796808192  | -1.850898871 |
| H339  | 1.190730819  | -2.332765497  | -6.092791896 |
| H340  | -3.157944159 | 2.190896690   | -6.025720635 |
| H341  | -5.234540976 | 0.984607690   | -6.728525414 |
| H342  | 2.191014933  | -6.053427158  | 0.802845443  |
| H343  | 8.227737177  | -7.638205752  | 0.706050330  |
| H344  | 7.044661115  | -9.518555531  | 0.879175039  |
| H345  | 3.777754567  | -1.006852822  | 5.018122069  |
| H346  | 5.089361344  | -8.005315273  | -6.544659448 |
| H347  | 6.246904779  | -6.337371049  | -3.056871920 |
| H348  | 0.243181516  | -3.143515693  | -7.375263351 |
| H349  | 4.302053599  | 3.795780737   | -7.093638347 |
| H350  | 7.641537285  | -0.133209755  | 3.923150066  |
| H351  | 7.723164778  | 0.258308191   | 2.189845837  |
| H352  | 8.607847835  | -7.396698166  | -6.349343455 |
| H353  | 7.784587985  | -8.577475140  | -5.570026101 |
| H354  | 9.895244111  | -9.076529288  | -1.575971321 |
| H355  | 8.140648692  | -8.688848768  | -2.974434823 |
| H356  | 11.321760791 | -8.168433227  | -3.738225348 |
| H357  | 9.828233884  | -7.348370075  | -1.174297762 |
| H358  | 10.426210929 | -0.187823082  | 2.229168285  |
| H359  | -2.406795569 | 13.371162115  | 3.394306252  |
| H360  | 9.916332661  | -7.127152461  | 5.632724303  |
| H361  | 9.438774784  | -4.700222706  | 4.435369174  |
| H362  | -4.181591379 | 12.506622015  | 1.095274820  |
| H363  | -3.673740884 | 10.554865215  | 3.424604238  |
| H364  | -5.224055700 | 11.322678563  | 3.034747251  |
| H365  | -6.200285993 | 6.984552970   | -1.659317944 |
| H366  | 2.910842979  | -1.015773628  | 0.570350923  |
| H367  | 2.457800828  | -3.282959021  | 0.351540694  |
| H368  | 1.239952053  | -1.052320446  | 0.509655649  |
| Mo369 | 3.660440416  | -4.590930794  | -2.336485354 |
| N370  | 2.094209320  | -1.045151468  | -0.047813766 |
| N371  | -0.127075121 | 2.248934208   | -0.163272529 |
| N372  | -0.467434803 | 2.465532863   | 0.872898553  |
| N373  | -7.266967868 | -6.905451579  | -0.017162779 |
| N374  | -8.906513152 | -4.201180402  | 1.977339896  |
| N375  | -8.320464449 | -4.417384342  | 4.721012746  |
| N376  | -5.675974516 | -5.370295143  | 4.764546417  |
| N377  | -4.302961571 | -3.084213821  | 3.765607537  |
| N378  | -4.796356139 | -1.312236103  | 5.968670852  |
| N379  | -3.786836464 | -2.668144367  | 8.360206535  |
| N380  | -1.395975899 | -4.165368896  | 7.710772351  |
| N381  | -0.023391626 | -2.463946945  | 5.946085115  |

|      |              |               |               |
|------|--------------|---------------|---------------|
| N382 | -0.041187732 | 0.524989090   | 6.519641690   |
| N383 | -0.234350980 | 0.497649889   | 9.401554314   |
| N384 | 5.076811704  | -11.502590413 | 5.471322372   |
| N385 | 5.960633599  | -9.332674552  | 4.159325853   |
| N386 | 5.120472156  | -3.262378137  | 3.085839549   |
| N387 | 4.267454283  | -1.874249432  | 4.778993608   |
| N388 | 4.937441851  | -0.976937796  | 2.745017596   |
| N389 | 8.762634629  | -7.200585245  | 3.919768242   |
| N390 | -5.987771740 | -2.838477923  | -2.792355239  |
| N391 | -2.147346470 | -5.602717100  | -3.012189753  |
| N392 | -6.119119416 | -0.320286020  | -2.048058182  |
| N393 | -8.355005829 | 0.934992285   | -0.918335250  |
| N394 | -7.876702467 | 0.718560057   | 1.846570743   |
| N395 | -5.680928321 | 2.394341856   | 2.352269346   |
| N396 | -3.091647363 | 2.442520952   | -0.972171303  |
| N397 | -2.691283467 | 0.349600248   | -0.324592897  |
| N398 | -6.102254455 | 5.087664033   | 2.791198981   |
| N399 | -9.462641408 | 8.205689965   | 1.535271026   |
| N400 | -9.223101564 | 10.026238419  | 2.781075026   |
| N401 | 9.534385119  | 2.245431843   | 2.380349845   |
| N402 | 6.566692473  | 6.888944838   | -0.529030685  |
| N403 | 4.452649621  | 8.207189069   | -3.047090762  |
| N404 | 1.774793166  | 7.672056974   | -3.479080901  |
| N405 | -2.972944269 | 6.389069009   | -4.562772128  |
| N406 | -3.202948758 | 8.175014241   | -6.063758014  |
| N407 | -4.195329976 | 8.272297480   | -3.973244203  |
| N408 | 0.809384467  | 6.216070702   | -1.188287357  |
| N409 | 1.208511834  | 8.136629301   | 0.806085487   |
| N410 | 0.070091795  | 10.593492916  | 0.394158187   |
| N411 | -1.572021206 | 10.308310341  | -3.205820572  |
| N412 | -2.260415705 | 11.714154076  | 1.432382995   |
| N413 | 3.716260511  | -5.154208943  | -10.206474642 |
| N414 | 2.247793197  | -2.852199592  | -7.827449591  |
| N415 | 1.277296483  | 0.002003059   | -7.319605421  |
| N416 | 3.420477001  | 1.902173385   | -7.486119985  |
| N417 | -1.895166615 | -3.252052256  | -10.019318878 |
| N418 | -3.377434661 | -1.315531831  | -8.481951681  |
| N419 | 7.722054422  | -7.602133815  | -5.878401169  |
| N420 | 3.960851342  | -5.869031604  | -4.271886596  |
| N421 | 3.296865603  | -6.862439512  | -6.125412345  |
| N422 | 8.851645271  | -7.952299525  | -2.970207809  |
| O423 | -6.733902312 | -4.884613741  | 1.965351593   |
| O424 | -7.321108720 | -2.369894601  | 4.664609560   |
| O425 | -5.504935511 | -4.725006275  | 6.950459554   |
| O426 | -2.572706071 | -3.710254665  | 5.103877827   |
| O427 | -2.856228878 | -0.274075495  | 5.391499274   |
| O428 | -3.002724654 | -0.595922856  | 8.926099968   |
| O429 | -0.677411874 | -3.753751402  | 9.850692327   |
| O430 | 1.927749945  | -3.611921246  | 6.344663314   |
| O431 | 2.182585184  | 0.148246213   | 6.127581305   |
| O432 | 1.517488687  | 1.936045085   | 9.329060801   |
| O433 | 2.128876583  | -0.308683258  | 11.973290772  |
| O434 | 6.667093381  | -10.550629092 | 2.326543328   |
| O435 | 7.715839602  | -7.851137152  | 5.860631866   |
| O436 | 11.458986056 | -4.925295668  | 4.602083329   |
| O437 | -5.928390189 | -0.812356681  | 0.193059258   |
| O438 | -3.925669928 | -4.456815536  | -3.843117150  |
| O439 | -7.072375381 | 2.755941946   | -0.426078409  |
| O440 | -6.203937893 | 3.130093501   | -3.348276887  |
| O441 | -9.778615168 | 1.929756447   | 2.282678512   |
| O442 | -5.711228111 | 1.858838692   | 4.574128871   |
| O443 | -4.068937421 | 5.263254049   | 3.809704531   |
| O444 | -6.105070974 | 7.751573387   | 5.116270994   |
| O445 | 10.639889484 | -0.529361421  | 4.230530835   |
| O446 | 3.696627827  | 4.623556080   | 3.823575602   |
| O447 | 3.931636180  | 8.219985063   | -0.825779718  |
| O448 | 1.279396772  | 9.903389406   | -3.731722693  |
| O449 | -1.200296496 | 7.201847558   | -1.657159702  |
| O450 | -0.501793286 | 7.192796770   | 2.014705829   |
| O451 | 2.588572675  | 5.608229180   | 1.305284795   |
| O452 | 1.312811774  | 11.551064830  | 2.064206401   |
| O453 | -1.842661659 | 13.705334216  | 0.407403340   |
| O454 | -2.874311837 | 11.226065884  | -1.567028458  |
| O455 | -4.341721692 | 14.006068442  | 3.243650804   |
| O456 | -5.253052604 | 6.988764739   | -1.420891282  |
| O457 | 1.436329362  | -4.825658363  | -8.676083011  |
| O458 | -0.385388987 | -0.974128565  | -8.561152135  |
| O459 | 2.058458638  | 3.332259909   | -8.610570998  |
| O460 | 5.628431893  | 4.056888966   | -9.332821299  |
| O461 | -5.161829215 | -2.679935620  | -8.882458175  |
| O462 | -1.784843375 | -6.732819841  | -5.827799242  |
| O463 | 0.139972703  | -5.960603939  | -6.652693450  |

|                                                                                     |                                |              |               |                  |
|-------------------------------------------------------------------------------------|--------------------------------|--------------|---------------|------------------|
|                                                                                     | O464                           | -3.908912278 | 2.223732372   | -8.583053991     |
|                                                                                     | O465                           | 9.652703951  | -5.955542999  | -3.682602473     |
|                                                                                     | O466                           | 12.300439570 | -7.578800346  | -2.045900880     |
|                                                                                     | O467                           | 0.103280023  | -6.236913685  | -1.128240479     |
|                                                                                     | O468                           | -0.473533662 | -7.212773031  | 0.816403297      |
|                                                                                     | O469                           | 4.686172723  | -11.214317347 | -3.056169557     |
|                                                                                     | O470                           | 2.427050035  | -11.095972714 | -3.058766681     |
|                                                                                     | O471                           | 4.895467237  | -6.071845506  | -1.252497021     |
|                                                                                     | O472                           | 4.781411733  | -7.677498064  | 0.322187168      |
|                                                                                     | O473                           | 2.386800457  | -6.256427017  | -1.936290424     |
|                                                                                     | O474                           | 8.712856463  | -6.867585488  | 1.113132515      |
|                                                                                     | O475                           | 6.933653949  | -4.800678304  | 0.293884657      |
|                                                                                     | O476                           | -4.223262405 | 4.827783947   | -2.510200645     |
|                                                                                     | O477                           | 7.282834316  | -10.809283563 | -2.260304318     |
|                                                                                     | O478                           | 7.168656780  | -8.924171861  | 0.097010049      |
|                                                                                     | S479                           | 3.603674304  | 4.779399847   | -2.466257874     |
|                                                                                     | S480                           | 1.914452649  | 1.695124808   | -3.305037275     |
|                                                                                     | S481                           | 1.819995694  | -3.529471866  | -3.385134432     |
|                                                                                     | S482                           | 3.445187267  | 1.612426787   | -0.177863443     |
|                                                                                     | S483                           | 0.279661762  | -0.921405118  | -1.948668022     |
|                                                                                     | S484                           | 3.897229537  | -0.978997220  | -5.551862726     |
|                                                                                     | S485                           | 3.663723630  | -3.842270857  | 0.047608819      |
|                                                                                     | S486                           | 5.541894413  | 1.498421627   | -3.098734689     |
|                                                                                     | S487                           | 5.538004759  | -3.370060741  | -3.124048899     |
|                                                                                     | S488                           | 6.163818812  | -1.070893981  | -0.282452248     |
|                                                                                     | end                            |              |               |                  |
| <b>Fe2-brNH2-Fe6-3b2</b><br><b>2N2 TS</b><br><b>35, S=1</b>                         |                                |              |               |                  |
| <b>Fe (139) -2.145</b>                                                              |                                |              |               |                  |
| <b>Fe (140) -0.995</b>                                                              |                                |              |               |                  |
| <b>Fe (141) -2.460</b>                                                              |                                |              |               |                  |
| <b>Fe (142) 2.818</b>                                                               |                                |              |               |                  |
| <b>Fe (143) 2.868</b>                                                               |                                |              |               |                  |
| <b>Fe (144) 2.240</b>                                                               |                                |              |               |                  |
| <b>Fe (145) -0.638</b>                                                              |                                |              |               |                  |
| 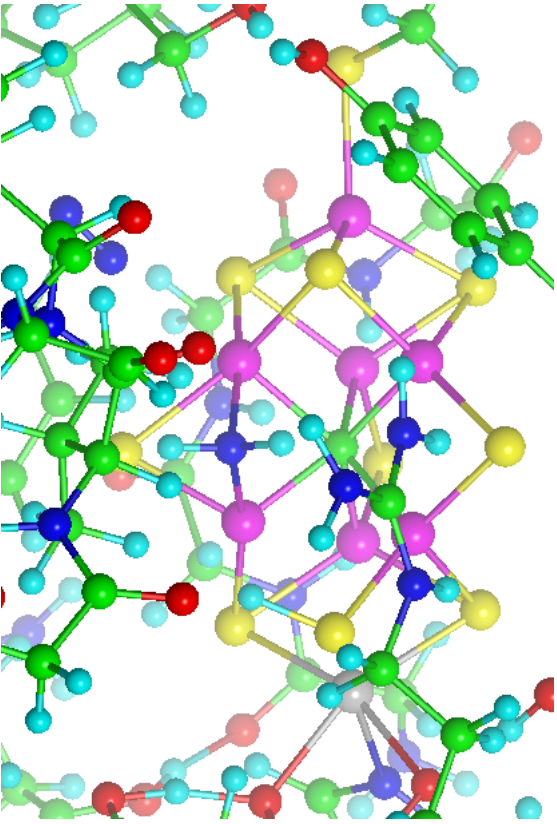 |                                |              |               |                  |
|                                                                                     | <b>fe2brnh2Fe63b22n2xdtc 1</b> |              |               | <b>53207.785</b> |
|                                                                                     | C1                             | -7.909425304 | -5.030354294  | 1.560945186      |
|                                                                                     | C2                             | -8.347609890 | -6.175942599  | 0.642319192      |
|                                                                                     | C3                             | -8.617590375 | -2.989684370  | 2.733811831      |
|                                                                                     | C4                             | -8.026256243 | -3.231532040  | 4.119753707      |
|                                                                                     | C5                             | -7.710556755 | -4.773289291  | 5.989398353      |
|                                                                                     | C6                             | -6.187867770 | -4.940844933  | 5.932630380      |
|                                                                                     | C7                             | -4.227430804 | -5.390422145  | 4.543392262      |
|                                                                                     | C8                             | -3.616342645 | -3.987530622  | 4.488657988      |
|                                                                                     | C9                             | -3.888754283 | -1.680576191  | 3.707183900      |
|                                                                                     | C10                            | -3.795546673 | -1.017639675  | 5.090340077      |
|                                                                                     | C11                            | -4.775292267 | -0.689132078  | 7.281498286      |
|                                                                                     | C12                            | -3.749117327 | -1.305308214  | 8.244605140      |
|                                                                                     | C13                            | -2.989897706 | -3.349269863  | 9.365218102      |
|                                                                                     | C14                            | -1.561218657 | -3.755620043  | 8.980148738      |
|                                                                                     | C15                            | -0.093697307 | -4.584980823  | 7.187964480      |
|                                                                                     | C16                            | 0.702995957  | -3.502719290  | 6.454282675      |
|                                                                                     | C17                            | 0.632624031  | -1.423236257  | 5.168476189      |
|                                                                                     | C18                            | 0.993555499  | -0.182725050  | 5.997891678      |
|                                                                                     | C19                            | -0.102941279 | -1.092036236  | 3.849855157      |
|                                                                                     | C20                            | 0.545191694  | 0.101948429   | 3.138982175      |
|                                                                                     | C21                            | -0.128617954 | -2.322377225  | 2.935652715      |
|                                                                                     | C22                            | 0.202089362  | 1.749072660   | 7.296633537      |
|                                                                                     | C23                            | 0.557916351  | 1.417560983   | 8.757574491      |
|                                                                                     | C24                            | -0.968954150 | 2.750758459   | 7.153990678      |
|                                                                                     | C25                            | -0.744660032 | 3.986071445   | 8.035494764      |
|                                                                                     | C26                            | -1.141104809 | 3.166513179   | 5.686311498      |
|                                                                                     | C27                            | 0.099955503  | 0.136228244   | 10.763139048     |
|                                                                                     | C28                            | 1.539055628  | -0.321701958  | 10.902855815     |
|                                                                                     | C29                            | 5.456787217  | -11.690864545 | 4.080683432      |
|                                                                                     | C30                            | 6.092745773  | -10.457375391 | 3.445983268      |
|                                                                                     | C31                            | 6.457919789  | -8.019500574  | 3.797009363      |
|                                                                                     | C32                            | 7.704436264  | -7.685073529  | 4.636447028      |
|                                                                                     | C33                            | 5.359974763  | -6.961285958  | 3.993311989      |
|                                                                                     | C34                            | 5.814688061  | -5.562150128  | 3.582983025      |
|                                                                                     | C35                            | 4.666719430  | -4.558738175  | 3.603003027      |
|                                                                                     | C36                            | 4.773041675  | -2.050680422  | 3.521279904      |
|                                                                                     | C37                            | 10.005687563 | -6.857462934  | 4.574769472      |
|                                                                                     | C38                            | 10.322042369 | -5.380482432  | 4.531527072      |
|                                                                                     | C39                            | -5.448204798 | -2.567140489  | -1.443431135     |
|                                                                                     | C40                            | -5.844876947 | -1.147466092  | -0.991453097     |
|                                                                                     | C41                            | -3.911470811 | -2.697901735  | -1.429655838     |
|                                                                                     | C42                            | -3.371863865 | -4.141969026  | -1.486865989     |
|                                                                                     | C43                            | -3.178790541 | -4.734673212  | -2.882405253     |
|                                                                                     | C44                            | -6.126983000 | 1.136457236   | -1.940130433     |
|                                                                                     | C45                            | -7.224891565 | 1.687628851   | -1.024642404     |
|                                                                                     | C46                            | -6.231523892 | 1.693410385   | -3.366682284     |
|                                                                                     | C47                            | -9.413055553 | 1.300983439   | 0.002727844      |
|                                                                                     | C48                            | -9.028606153 | 1.345360612   | 1.486326640      |
|                                                                                     | C49                            | -7.369409011 | 0.816960935   | 3.206474895      |
|                                                                                     | C50                            | -6.170342390 | 1.740508968   | 3.435127989      |
|                                                                                     | C51                            | -4.504180007 | 3.271065471   | 2.490769577      |
|                                                                                     | C52                            | -4.872165236 | 4.620851264   | 3.127857724      |
|                                                                                     | C53                            | -3.870126196 | 3.586147723   | 1.125309991      |
|                                                                                     | C54                            | -3.380952365 | 2.389368783   | 0.383069312      |

|      |              |               |              |
|------|--------------|---------------|--------------|
| C55  | -3.111328683 | 1.086184788   | 0.751108027  |
| C56  | -2.638110215 | 1.198714562   | -1.342228967 |
| C57  | -6.529816085 | 6.434169716   | 3.101689139  |
| C58  | -6.371736305 | 6.661849087   | 4.602683507  |
| C59  | -8.016341426 | 6.543665389   | 2.688176774  |
| C60  | -8.595385267 | 7.921823912   | 2.564102043  |
| C61  | -8.442960485 | 9.045435041   | 3.354547455  |
| C62  | -9.834679577 | 9.462259680   | 1.680963040  |
| C63  | 9.206573156  | 1.250311956   | 3.416532580  |
| C64  | 10.166804399 | 0.082479410   | 3.289423922  |
| C65  | 7.777494980  | 0.685342414   | 3.215886873  |
| C66  | 6.703107128  | 1.730112978   | 3.404534352  |
| C67  | 6.119431598  | 1.956492991   | 4.664050930  |
| C68  | 6.253591823  | 2.507518811   | 2.321126699  |
| C69  | 5.116289514  | 2.914997632   | 4.840045161  |
| C70  | 5.266442355  | 3.478356816   | 2.485103799  |
| C71  | 4.692197431  | 3.675035223   | 3.743649050  |
| C72  | 5.581600119  | 6.576564349   | -1.567060242 |
| C73  | 4.589093290  | 7.735606342   | -1.759285733 |
| C74  | 4.819046480  | 5.304826260   | -1.190179410 |
| C75  | 3.586751533  | 9.310586234   | -3.377535666 |
| C76  | 2.102965755  | 8.969939245   | -3.538330394 |
| C77  | 0.418160477  | 7.136490518   | -3.459046124 |
| C78  | -0.077377068 | 6.850861840   | -2.018169965 |
| C79  | 0.415398667  | 5.875236630   | -4.350843724 |
| C80  | -0.863879006 | 5.037458660   | -4.458969823 |
| C81  | -1.992612704 | 5.608863303   | -5.331434204 |
| C82  | -3.457151812 | 7.582331172   | -4.881003584 |
| C83  | 0.376983371  | 5.897905058   | 0.189854433  |
| C84  | 0.287154353  | 7.141342850   | 1.082592114  |
| C85  | 1.331071072  | 4.902298583   | 0.881609552  |
| C86  | 1.494172534  | 9.155001025   | 1.773981958  |
| C87  | 0.957855157  | 10.533174257  | 1.424890377  |
| C88  | -0.349459520 | 11.871824563  | -0.135393910 |
| C89  | -1.566959276 | 12.502908074  | 0.580145912  |
| C90  | -0.548517237 | 11.877499092  | -1.655823607 |
| C91  | -1.770561395 | 11.095222222  | -2.123329989 |
| C92  | -3.567298916 | 12.130670870  | 1.927923674  |
| C93  | -3.417006282 | 13.268755043  | 2.924727712  |
| C94  | -4.295754209 | 10.932713821  | 2.597716149  |
| C95  | -4.597544676 | 9.833556534   | 1.605983857  |
| C96  | -5.774132539 | 9.868306317   | 0.842465756  |
| C97  | -3.685642012 | 8.791072603   | 1.370561251  |
| C98  | -6.024093044 | 8.911999528   | -0.142830415 |
| C99  | -3.906280877 | 7.840236258   | 0.370822844  |
| C100 | -5.075347910 | 7.917628493   | -0.382145783 |
| C101 | 3.774369158  | -4.323067305  | -8.999716210 |
| C102 | 2.375254488  | -4.008553960  | -8.498966360 |
| C103 | 1.020841613  | -2.396518768  | -7.177950978 |
| C104 | 0.555846003  | -1.050948746  | -7.748395296 |
| C105 | 1.006921730  | 1.366686715   | -7.758753868 |
| C106 | 2.214500683  | 2.270682440   | -7.993155806 |
| C107 | 4.533898975  | 2.841288893   | -7.549457759 |
| C108 | 5.019242045  | 3.067386275   | -8.965953894 |
| C109 | -2.965779887 | -3.661256836  | -9.086925610 |
| C110 | -3.938282410 | -2.509454797  | -8.808422685 |
| C111 | -2.510392036 | -4.305650494  | -7.757793907 |
| C112 | -1.869640131 | -5.685150947  | -8.000362887 |
| C113 | -1.185481642 | -6.183737553  | -6.747827322 |
| C114 | -4.224251760 | -0.155786974  | -8.223303681 |
| C115 | -3.632088589 | 1.079621843   | -8.871273595 |
| C116 | -4.676633249 | 0.039457503   | -6.754244275 |
| C117 | -3.473670626 | 0.054114808   | -5.858357491 |
| C118 | -2.743029770 | 1.238087968   | -5.663942204 |
| C119 | -2.958323408 | -1.157621066  | -5.370286139 |
| C120 | -1.473213767 | 1.186607259   | -5.083758542 |
| C121 | -1.691203496 | -1.204698371  | -4.787272025 |
| C122 | -0.929131925 | -0.036727613  | -4.689369656 |
| C123 | 7.588090493  | -6.708518848  | -4.702461622 |
| C124 | 8.772305411  | -6.830565353  | -3.729616415 |
| C125 | 6.261301644  | -6.952651412  | -3.967064830 |
| C126 | 5.007953980  | -6.678664100  | -4.735781326 |
| C127 | 4.587004479  | -7.293174041  | -5.897563741 |
| C128 | 2.960484655  | -6.006432353  | -5.125428448 |
| C129 | 9.931659343  | -8.068803780  | -2.000326133 |
| C130 | 11.288800591 | -7.906136765  | -2.648187363 |
| C131 | 0.394588657  | -6.839195414  | 0.005751558  |
| C132 | 1.884367142  | -6.980855092  | 0.302786828  |
| C133 | 2.779882126  | -7.195036498  | -0.954631524 |
| C134 | 2.623913682  | -8.650209580  | -1.468504768 |
| C135 | 3.650071806  | -9.089710105  | -2.515598962 |
| C136 | 3.570728495  | -10.585778663 | -2.890607585 |

|       |              |              |               |
|-------|--------------|--------------|---------------|
| C137  | 4.253159641  | -6.970743373 | -0.573816371  |
| C138  | 3.524994223  | -0.924580570 | -2.273669818  |
| Fe139 | 3.647557383  | -2.269643195 | -3.722500536  |
| Fe140 | 2.086249808  | 0.339514615  | -1.473260051  |
| Fe141 | 4.834955876  | 0.299758158  | -1.424614550  |
| Fe142 | 3.647481700  | 0.341520480  | -3.782297720  |
| Fe143 | 3.687076158  | 2.528729175  | -2.218353824  |
| Fe144 | 4.690216442  | -2.284292195 | -1.373062016  |
| Fe145 | 2.104665899  | -2.050263609 | -1.752650371  |
| H146  | -6.605533055 | -7.236248139 | 0.664783593   |
| H147  | -6.769573693 | -6.286137114 | -0.651197953  |
| H148  | -9.828646375 | -4.290835780 | 1.552801672   |
| H149  | -9.048996245 | -5.779806474 | -0.109209513  |
| H150  | -8.932882113 | -6.874445142 | 1.264938826   |
| H151  | -7.898364739 | -2.354528285 | 2.195406134   |
| H152  | -8.902074183 | -5.080976300 | 4.223413182   |
| H153  | -9.550832213 | -2.422788610 | 2.850633625   |
| H154  | -8.158267921 | -5.716110157 | 6.330458555   |
| H155  | -6.268590624 | -5.416176481 | 3.925919699   |
| H156  | -7.914017255 | -4.003227236 | 6.744998535   |
| H157  | -2.903147970 | -1.584356143 | 3.235599437   |
| H158  | -5.128675667 | -3.366336089 | 3.243554701   |
| H159  | -4.027171205 | -5.913168457 | 3.598519989   |
| H160  | -4.537684324 | 0.378735973  | 7.196287629   |
| H161  | -5.620325979 | -1.806691411 | 5.640541566   |
| H162  | -3.733202459 | -5.936858471 | 5.354793484   |
| H163  | -4.615174344 | -1.141965516 | 3.083238661   |
| H164  | -4.443080640 | -3.202985042 | 7.798220666   |
| H165  | -5.776793587 | -0.796543517 | 7.720924496   |
| H166  | -0.600122021 | -3.188291519 | 3.421393254   |
| H167  | -0.688148859 | -2.107638872 | 2.011649693   |
| H168  | 0.895431347  | -2.611216499 | 2.645295223   |
| H169  | -1.133359429 | -0.805083060 | 4.108019859   |
| H170  | -3.529911798 | -4.262090686 | 9.655388169   |
| H171  | -1.353088777 | 2.309040222  | 5.032848359   |
| H172  | -1.055398601 | 0.106761454  | 8.965309261   |
| H173  | -0.681611411 | 3.733463498  | 9.103657410   |
| H174  | 0.006652807  | 0.310848462  | 2.204183803   |
| H175  | 1.598656337  | -0.096356232 | 2.883802824   |
| H176  | 9.281453062  | 1.629035532  | 4.453672902   |
| H177  | -1.972229751 | 3.879578287  | 5.581186776   |
| H178  | -1.575005996 | 4.694820535  | 7.899615327   |
| H179  | -0.224129453 | 3.657290070  | 5.319678172   |
| H180  | 0.189093350  | 4.498058220  | 7.752234237   |
| H181  | -1.894235393 | 2.247617163  | 7.489282228   |
| H182  | 1.114468394  | 2.215410266  | 6.896110824   |
| H183  | -0.997530397 | 0.253988649  | 6.306444726   |
| H184  | 0.515117122  | 1.017002569  | 3.747997742   |
| H185  | 1.575779928  | 4.092766113  | 0.178146644   |
| H186  | 0.779479867  | 4.476161795  | 1.732250362   |
| H187  | 2.772436222  | 5.169737321  | 2.195521372   |
| H188  | 3.345559377  | 4.642275988  | 4.752089018   |
| H189  | 4.909984480  | 4.060027366  | 1.634233813   |
| H190  | 6.657065910  | 2.326400370  | 1.321992376   |
| H191  | 6.441804146  | 1.361819186  | 5.523538881   |
| H192  | -1.034165188 | -2.526078943 | 5.941854515   |
| H193  | -0.226167394 | -5.426012552 | 6.490544992   |
| H194  | 0.525583114  | -4.929499874 | 8.025019041   |
| H195  | -2.161033782 | -4.127749996 | 7.029802039   |
| H196  | -2.901746188 | -2.704420214 | 10.248445677  |
| H197  | 4.658223489  | 3.061331194  | 5.822265168   |
| H198  | 1.610790805  | -1.840971568 | 4.896131459   |
| H199  | -0.086502317 | 0.953996095  | 11.477802579  |
| H200  | -0.539933970 | -0.716145633 | 11.041102432  |
| H201  | 1.992971670  | -0.739566462 | 9.973524413   |
| H202  | 10.851041628 | -7.426242909 | 4.157204724   |
| H203  | -1.994819464 | -6.034793734 | -3.929501256  |
| H204  | 1.079034177  | -6.095030950 | -1.645700377  |
| H205  | -2.654923543 | -6.404754670 | -8.272552273  |
| H206  | -1.148408600 | -5.628495849 | -8.828827453  |
| H207  | -3.367395015 | -4.427148719 | -7.076718002  |
| H208  | -2.924496540 | 0.870374292  | -9.707766157  |
| H209  | -3.586296353 | -4.401379536 | -9.615600926  |
| H210  | -3.500311629 | -2.106576845 | -2.262620632  |
| H211  | -4.048520690 | -4.822655829 | -0.940378109  |
| H212  | -2.365623791 | -1.213614195 | -8.403416420  |
| H213  | -5.145853846 | -0.342476067 | -8.814268947  |
| H214  | -1.211907054 | -2.648286278 | -9.544864805  |
| H215  | -1.492820270 | -5.795998641 | -2.258610490  |
| H216  | -1.803508807 | -3.628285135 | -7.254164005  |
| H217  | -1.400886477 | -4.068997043 | -10.351574185 |
| H218  | -6.916697763 | -3.263534218 | -2.721787338  |

|      |               |              |               |
|------|---------------|--------------|---------------|
| H219 | -3.537303434  | -2.222220717 | -0.513108380  |
| H220 | 0.504528985   | -5.492671515 | -7.472181280  |
| H221 | -2.411511346  | -4.185225782 | -0.951352905  |
| H222 | -3.770958350  | 2.798520034  | 3.159616670   |
| H223 | -3.232859700  | 0.638203293  | 1.733771667   |
| H224 | -8.186291176  | 1.191132905  | 3.839103979   |
| H225 | -7.296591569  | 0.239193111  | 1.146678249   |
| H226 | -6.713752961  | 4.486574967  | 2.232475289   |
| H227 | -7.839387872  | 9.241605913  | 4.232822263   |
| H228 | -6.569806571  | 5.752485373  | 5.220228226   |
| H229 | -8.619228224  | 5.925712364  | 3.377599960   |
| H230 | -5.921566409  | 7.181360513  | 2.567186767   |
| H231 | -10.521137424 | 10.016282732 | 1.046134700   |
| H232 | -3.041254047  | 4.289865519  | 1.312690986   |
| H233 | -4.609781855  | 4.123651717  | 0.508323281   |
| H234 | -9.346801806  | 10.967998742 | 3.105828847   |
| H235 | -8.117707954  | 6.076677351  | 1.695343533   |
| H236 | -6.070337375  | 2.252714773  | 1.425345690   |
| H237 | -7.101003872  | -0.178218649 | 3.591424600   |
| H238 | -9.804296922  | 2.299666415  | -0.236159512  |
| H239 | -2.299541113  | 0.972087016  | -2.350511423  |
| H240 | -10.235208187 | 0.583422954  | -0.121328453  |
| H241 | 10.360217355  | 2.766592229  | 2.661920070   |
| H242 | 8.769186530   | 2.928393132  | 2.328638943   |
| H243 | 1.655485686   | 5.775739792  | -1.545814288  |
| H244 | -0.629524969  | 5.455086423  | 0.174392209   |
| H245 | 1.948328488   | 7.888116568  | 0.146499580   |
| H246 | -3.204311153  | 3.273389196  | -1.558059423  |
| H247 | -4.944327529  | 4.212592515  | -2.767811137  |
| H248 | -6.440971111  | 3.441068268  | -4.226190569  |
| H249 | -4.607476428  | 5.473183005  | -1.868356823  |
| H250 | -5.382768521  | 1.301353811  | -3.951908981  |
| H251 | -7.173218525  | 1.354148989  | -3.828006750  |
| H252 | 0.372054087   | 11.531955703 | -2.146634900  |
| H253 | -0.709443336  | 12.926416412 | -1.950615825  |
| H254 | -0.608635192  | 10.063779012 | -3.491097218  |
| H255 | -2.324713134  | 9.655732950  | -3.425776996  |
| H256 | -3.382600522  | 9.158717490  | -6.195749277  |
| H257 | -2.531717425  | 4.788470108  | -5.829384671  |
| H258 | -6.950340180  | 8.943751737  | -0.722236428  |
| H259 | -2.782130723  | 8.695133072  | 1.978282089   |
| H260 | -4.431530607  | 7.815349011  | -3.085698250  |
| H261 | 1.208509187   | 5.206996424  | -3.979999739  |
| H262 | 2.539077509   | 6.987902227  | -3.309509333  |
| H263 | -1.256927396  | 4.771024191  | -3.465515221  |
| H264 | -8.369605734  | 0.035953799  | -1.384941382  |
| H265 | 3.931243721   | 9.764023014  | -4.316646063  |
| H266 | -6.039071396  | -0.809930193 | -2.939634697  |
| H267 | 0.728459674   | 6.187588923  | -5.361307892  |
| H268 | -3.161357547  | 7.070675720  | 0.166691347   |
| H269 | 3.641862365   | 10.078583544 | -2.592699843  |
| H270 | -2.684158272  | 7.687458322  | -6.790135844  |
| H271 | -4.860269755  | 8.954188496  | -4.314188721  |
| H272 | -5.354608754  | -3.476373783 | -3.286811593  |
| H273 | -5.852859531  | -3.242390319 | -0.665139669  |
| H274 | -6.512845234  | 10.653723841 | 1.019643124   |
| H275 | -5.187210629  | 1.488108025  | -1.491440520  |
| H276 | -0.247137572  | 7.907152655  | -3.859921840  |
| H277 | -1.557799871  | 6.233977244  | -6.122677699  |
| H278 | -0.557249292  | 4.090252992  | -4.923565179  |
| H279 | -3.400752574  | 5.886513787  | -3.754175972  |
| H280 | 1.066872941   | 8.868133711  | 2.746659255   |
| H281 | -0.078886115  | 9.728698616  | -0.147315070  |
| H282 | 0.470522050   | 12.573383459 | 0.084700715   |
| H283 | 2.582514717   | 9.246793905  | 1.891736598   |
| H284 | -2.071443962  | 10.708249635 | 1.382210139   |
| H285 | 4.311294960   | -3.388556341 | -9.219373216  |
| H286 | 4.296040415   | -4.799406608 | -8.142979962  |
| H287 | 7.616472982   | -5.667375922 | -5.055707807  |
| H288 | 4.632738161   | -5.572910547 | -10.363205010 |
| H289 | 3.071491787   | -5.934158393 | -10.021704218 |
| H290 | 5.550473746   | 4.498069837  | -1.051713295  |
| H291 | 6.065188175   | 7.158156527  | 0.329530589   |
| H292 | 5.013319358   | 7.771283635  | -3.770872500  |
| H293 | 4.268148364   | 5.463137791  | -0.252982117  |
| H294 | 7.136501694   | 7.671891806  | -0.795128801  |
| H295 | 5.369884147   | 2.405706287  | -6.979496552  |
| H296 | 6.128426996   | 6.401591643  | -2.506816284  |
| H297 | 5.041512237   | -6.968284512 | 5.049396587   |
| H298 | 6.726161061   | -8.064413977 | 2.734233083   |
| H299 | 3.535792905   | 1.060749584  | -6.918275739  |
| H300 | 4.958561697   | -0.050762481 | 3.139420875   |



|       |              |               |              |
|-------|--------------|---------------|--------------|
| H301  | 0.441933684  | 1.316955105   | -8.697324824 |
| H302  | -1.288173808 | -2.147130067  | -4.409684927 |
| H303  | 0.367040201  | 1.889638297   | -7.027138678 |
| H304  | 4.286187889  | -4.436741439  | 4.624033979  |
| H305  | 1.946229170  | -0.169972654  | -6.553316861 |
| H306  | 3.830812413  | -4.919749233  | 2.980256912  |
| H307  | 4.499069199  | -7.271989629  | 3.380256978  |
| H308  | 6.234098399  | -5.591301427  | 2.566293023  |
| H309  | 6.612117793  | -5.200834687  | 4.251073286  |
| H310  | -5.358811603 | -0.785374456  | -6.501417417 |
| H311  | 5.507638747  | -9.466739475  | 5.083393431  |
| H312  | 4.552961417  | -11.906244876 | 3.490714861  |
| H313  | 0.067913705  | -0.070766458  | -4.254377056 |
| H314  | 5.856443289  | -11.769968738 | 6.099412732  |
| H315  | 4.297111877  | -12.106915123 | 5.728925719  |
| H316  | 5.519331118  | -3.308814055  | 2.134434542  |
| H317  | -0.890844397 | 2.096204191   | -4.933859965 |
| H318  | -3.544882617 | -2.073978377  | -5.466690347 |
| H319  | 7.220593324  | -10.286722750 | -1.429649536 |
| H320  | 6.229565091  | -8.006328065  | -3.641505334 |
| H321  | 6.305559771  | -8.418971558  | 0.082013367  |
| H322  | 6.320234504  | -10.896749138 | -2.543632646 |
| H323  | 4.771374132  | 2.248613157   | -9.683488479 |
| H324  | 6.242548474  | -5.283860720  | -0.225333917 |
| H325  | 2.033248751  | -7.789366732  | 1.028125957  |
| H326  | 3.087343006  | -2.308228395  | -7.605478048 |
| H327  | 2.703037550  | -9.310542148  | -0.590266262 |
| H328  | 2.680099572  | -7.164440029  | -6.864623755 |
| H329  | 1.984475879  | -5.545823647  | -5.044408357 |
| H330  | 6.154162163  | -12.527893973 | 3.905301785  |
| H331  | 5.365375924  | -1.071567707  | 1.781636507  |
| H332  | 8.169655229  | -6.096477298  | 0.832734719  |
| H333  | 7.176839737  | -4.042440140  | -0.218611107 |
| H334  | 8.695986343  | -7.111181030  | 2.889028384  |
| H335  | 3.934743751  | -2.676063318  | 5.297543953  |
| H336  | 3.499860333  | -8.512432874  | -3.441370725 |
| H337  | 4.669676854  | -8.877172661  | -2.166356416 |
| H338  | 1.605677631  | -8.768677318  | -1.869675552 |
| H339  | 1.195287665  | -2.321902936  | -6.093123711 |
| H340  | -3.156701246 | 2.187376178   | -6.013045152 |
| H341  | -5.239869171 | 0.983770589   | -6.709419447 |
| H342  | 2.185745869  | -6.038648793  | 0.790732526  |
| H343  | 8.221522077  | -7.650892564  | 0.713355430  |
| H344  | 7.028544709  | -9.522978014  | 0.888296497  |
| H345  | 3.767422828  | -1.003916619  | 4.995539615  |
| H346  | 5.082706189  | -8.013068762  | -6.539093772 |
| H347  | 6.249076036  | -6.354082363  | -3.049352656 |
| H348  | 0.240968568  | -3.136674070  | -7.368968548 |
| H349  | 4.287975403  | 3.812441975   | -7.092381278 |
| H350  | 7.636731395  | -0.134177025  | 3.936501042  |
| H351  | 7.712457905  | 0.257101267   | 2.202720753  |
| H352  | 8.616556178  | -7.359963950  | -6.353709185 |
| H353  | 7.814487209  | -8.559727463  | -5.581662690 |
| H354  | 9.893713394  | -9.083500403  | -1.573456307 |
| H355  | 8.141250433  | -8.689779204  | -2.973074844 |
| H356  | 11.320291695 | -8.169945450  | -3.733015485 |
| H357  | 9.828370872  | -7.356311449  | -1.166190948 |
| H358  | 10.427296209 | -0.185653136  | 2.236715853  |
| H359  | -2.406515219 | 13.367057369  | 3.386259888  |
| H360  | 9.909518391  | -7.132237674  | 5.641068905  |
| H361  | 9.435399232  | -4.705791097  | 4.445225221  |
| H362  | -4.186830789 | 12.499206380  | 1.092546015  |
| H363  | -3.676439079 | 10.551597472  | 3.424999847  |
| H364  | -5.226833767 | 11.320055474  | 3.036328326  |
| H365  | -6.208551953 | 6.988476045   | -1.663255099 |
| H366  | 2.903070117  | -1.005083384  | 0.591645463  |
| H367  | 2.403438850  | -3.289529585  | 0.282467315  |
| H368  | 1.228283564  | -1.046578403  | 0.531169059  |
| Mo369 | 3.670104958  | -4.582864126  | -2.341044803 |
| N370  | 2.083855420  | -1.033764587  | -0.023683529 |
| N371  | 0.270482376  | 1.846503433   | -0.334220722 |
| N372  | -0.334999132 | 2.501190103   | 0.324532578  |
| N373  | -7.286284918 | -6.908230126  | -0.024927290 |
| N374  | -8.907668246 | -4.196816593  | 1.974104607  |
| N375  | -8.314186481 | -4.412908845  | 4.716144810  |
| N376  | -5.668964065 | -5.364439753  | 4.752901032  |
| N377  | -4.299344948 | -3.075614918  | 3.758124970  |
| N378  | -4.790099466 | -1.303984331  | 5.963035915  |
| N379  | -3.771743917 | -2.660616701  | 8.348911751  |
| N380  | -1.389286810 | -4.177355788  | 7.698778028  |
| N381  | -0.017006309 | -2.465840775  | 5.947697264  |
| N382  | -0.036197525 | 0.532518481   | 6.519324273  |

|      |              |               |               |
|------|--------------|---------------|---------------|
| N383 | -0.219067231 | 0.506564864   | 9.396189827   |
| N384 | 5.082122782  | -11.499506765 | 5.488594773   |
| N385 | 5.955548355  | -9.330715227  | 4.171485001   |
| N386 | 5.115191535  | -3.266582260  | 3.073045171   |
| N387 | 4.251156298  | -1.874257209  | 4.755976373   |
| N388 | 4.941671340  | -0.980619899  | 2.726618663   |
| N389 | 8.756960731  | -7.205474168  | 3.927970314   |
| N390 | -5.991636018 | -2.832084023  | -2.783426998  |
| N391 | -2.157743903 | -5.603491646  | -3.014494025  |
| N392 | -6.109771348 | -0.314774680  | -2.036348296  |
| N393 | -8.348672768 | 0.938747108   | -0.915589667  |
| N394 | -7.872210400 | 0.725735774   | 1.847970100   |
| N395 | -5.659944232 | 2.390128192   | 2.351821949   |
| N396 | -3.072992880 | 2.444774098   | -0.965209888  |
| N397 | -2.654510822 | 0.355361441   | -0.320285439  |
| N398 | -6.099666013 | 5.083367115   | 2.781897211   |
| N399 | -9.469007734 | 8.195573732   | 1.523593739   |
| N400 | -9.235372502 | 10.013680378  | 2.774243098   |
| N401 | 9.526395453  | 2.241831351   | 2.386485646   |
| N402 | 6.567586254  | 6.867689323   | -0.515628228  |
| N403 | 4.462701836  | 8.206132435   | -3.035069348  |
| N404 | 1.780726665  | 7.663861471   | -3.462165267  |
| N405 | -2.967924763 | 6.386759856   | -4.559767400  |
| N406 | -3.202793900 | 8.168895626   | -6.064817033  |
| N407 | -4.191261293 | 8.269389205   | -3.971944525  |
| N408 | 0.782308905  | 6.200625061   | -1.183541271  |
| N409 | 1.199673846  | 8.116498368   | 0.805237090   |
| N410 | 0.065901426  | 10.583780861  | 0.389418789   |
| N411 | -1.567738752 | 10.303404322  | -3.209711647  |
| N412 | -2.265592999 | 11.706209653  | 1.428607699   |
| N413 | 3.712877450  | -5.156236506  | -10.203076021 |
| N414 | 2.244236766  | -2.844468209  | -7.831213897  |
| N415 | 1.270134526  | 0.009913757   | -7.316809121  |
| N416 | 3.417202621  | 1.912060733   | -7.477585584  |
| N417 | -1.903863011 | -3.245442314  | -10.013769762 |
| N418 | -3.383921702 | -1.312032943  | -8.469591415  |
| N419 | 7.735965875  | -7.582605430  | -5.880680845  |
| N420 | 3.973707705  | -5.861629903  | -4.271804475  |
| N421 | 3.300527594  | -6.855198638  | -6.121371716  |
| N422 | 8.852487572  | -7.953639384  | -2.964792965  |
| O423 | -6.737164698 | -4.887056493  | 1.953956574   |
| O424 | -7.313452736 | -2.366064122  | 4.656935348   |
| O425 | -5.493019114 | -4.719018297  | 6.938357692   |
| O426 | -2.566242867 | -3.703488086  | 5.092582000   |
| O427 | -2.854192438 | -0.261828580  | 5.380373932   |
| O428 | -2.988091040 | -0.588401276  | 8.916412748   |
| O429 | -0.660416648 | -3.746690125  | 9.830998207   |
| O430 | 1.933183710  | -3.621647533  | 6.328585670   |
| O431 | 2.187494476  | 0.144114525   | 6.140137742   |
| O432 | 1.527795954  | 1.951616026   | 9.322957348   |
| O433 | 2.151383166  | -0.302485039  | 11.960382625  |
| O434 | 6.654183198  | -10.547162560 | 2.335038726   |
| O435 | 7.704625316  | -7.839923299  | 5.871178287   |
| O436 | 11.455859398 | -4.933232881  | 4.609518823   |
| O437 | -5.920883521 | -0.809149891  | 0.204285679   |
| O438 | -3.936596513 | -4.454621495  | -3.839964551  |
| O439 | -7.066638029 | 2.758351435   | -0.412646919  |
| O440 | -6.199658711 | 3.133894287   | -3.334356681  |
| O441 | -9.780126249 | 1.928661396   | 2.282096259   |
| O442 | -5.707810464 | 1.868073033   | 4.576297811   |
| O443 | -4.079544253 | 5.267551584   | 3.822986194   |
| O444 | -6.121610610 | 7.741833086   | 5.114005262   |
| O445 | 10.617271702 | -0.545568165  | 4.237291953   |
| O446 | 3.691170035  | 4.623060592   | 3.840889700   |
| O447 | 3.941828011  | 8.216080506   | -0.813141169  |
| O448 | 1.286001370  | 9.893471100   | -3.727638584  |
| O449 | -1.208359482 | 7.218441257   | -1.665000723  |
| O450 | -0.518595139 | 7.195841018   | 2.020366749   |
| O451 | 2.529277286  | 5.543101913   | 1.324459635   |
| O452 | 1.309894826  | 11.532570064  | 2.063051271   |
| O453 | -1.844746702 | 13.698877586  | 0.408119939   |
| O454 | -2.874892587 | 11.220162814  | -1.574362475  |
| O455 | -4.341194115 | 14.004416895  | 3.237762202   |
| O456 | -5.262248881 | 6.989692159   | -1.421318536  |
| O457 | 1.434018863  | -4.820169737  | -8.676817165  |
| O458 | -0.386823895 | -0.970323598  | -8.564669147  |
| O459 | 2.056495721  | 3.340397618   | -8.606481991  |
| O460 | 5.671892977  | 4.040885791   | -9.306768542  |
| O461 | -5.168472965 | -2.675759552  | -8.870301961  |
| O462 | -1.780724838 | -6.729017767  | -5.825279522  |
| O463 | 0.140549291  | -5.952387260  | -6.653888487  |
| O464 | -3.929315682 | 2.226291464   | -8.568327896  |

|                                                                                                                                                                                                                                                 |              |                                   |               |              |
|-------------------------------------------------------------------------------------------------------------------------------------------------------------------------------------------------------------------------------------------------|--------------|-----------------------------------|---------------|--------------|
|                                                                                                                                                                                                                                                 | O465         | 9.659133085                       | -5.956761135  | -3.669895765 |
|                                                                                                                                                                                                                                                 | O466         | 12.301423299                      | -7.587540665  | -2.039765206 |
|                                                                                                                                                                                                                                                 | O467         | 0.106930338                       | -6.218425218  | -1.141889512 |
|                                                                                                                                                                                                                                                 | O468         | -0.477822155                      | -7.215223158  | 0.789351815  |
|                                                                                                                                                                                                                                                 | O469         | 4.680150415                       | -11.206837191 | -3.051152608 |
|                                                                                                                                                                                                                                                 | O470         | 2.421100897                       | -11.087857015 | -3.044287604 |
|                                                                                                                                                                                                                                                 | O471         | 4.899485774                       | -6.057504258  | -1.248991916 |
|                                                                                                                                                                                                                                                 | O472         | 4.775793659                       | -7.669099723  | 0.317859051  |
|                                                                                                                                                                                                                                                 | O473         | 2.391012439                       | -6.242226611  | -1.945522189 |
|                                                                                                                                                                                                                                                 | O474         | 8.704098799                       | -6.878369222  | 1.120056227  |
|                                                                                                                                                                                                                                                 | O475         | 6.911076932                       | -4.804782761  | 0.328516736  |
|                                                                                                                                                                                                                                                 | O476         | -4.216828248                      | 4.831696343   | -2.501619309 |
|                                                                                                                                                                                                                                                 | O477         | 7.279641499                       | -10.815926335 | -2.256268235 |
|                                                                                                                                                                                                                                                 | O478         | 7.159015556                       | -8.933053008  | 0.103378389  |
|                                                                                                                                                                                                                                                 | S479         | 3.598501301                       | 4.795279368   | -2.486595079 |
|                                                                                                                                                                                                                                                 | S480         | 1.873501048                       | 1.702876865   | -3.321773214 |
|                                                                                                                                                                                                                                                 | S481         | 1.819575083                       | -3.530763203  | -3.367931868 |
|                                                                                                                                                                                                                                                 | S482         | 3.506746958                       | 1.635534051   | -0.188798034 |
|                                                                                                                                                                                                                                                 | S483         | 0.268697120                       | -0.986148174  | -1.961502735 |
|                                                                                                                                                                                                                                                 | S484         | 3.857734124                       | -0.998147732  | -5.557372443 |
|                                                                                                                                                                                                                                                 | S485         | 3.634987537                       | -3.824630236  | 0.035610697  |
|                                                                                                                                                                                                                                                 | S486         | 5.498064774                       | 1.509078744   | -3.167025421 |
|                                                                                                                                                                                                                                                 | S487         | 5.532157547                       | -3.345709230  | -3.135348789 |
|                                                                                                                                                                                                                                                 | S488         | 6.183031272                       | -1.047468517  | -0.306950420 |
|                                                                                                                                                                                                                                                 | end          |                                   |               |              |
| <b>Fe2-NH3</b><br><b>2N2 associated</b><br><b>35, S=1</b><br><br><b>Fe (139) -2.269</b><br><b>Fe (140) 0.009</b><br><b>Fe (141) -2.749</b><br><b>Fe (142) 2.766</b><br><b>Fe (143) 3.199</b><br><b>Fe (144) 2.326</b><br><b>Fe (145) -1.822</b> |              | <b>bmexpprot2nh32n2xdtd.car_3</b> |               |              |
| 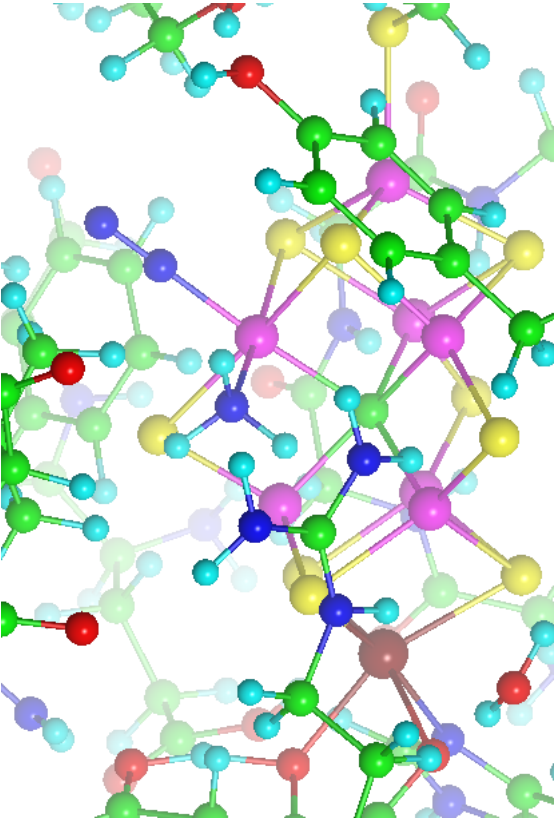                                                                                                                                                             | C1           | -3.092612840                      | -4.747867519  | -7.617806296 |
|                                                                                                                                                                                                                                                 | C2           | -2.243743789                      | -4.786416586  | -8.893216973 |
|                                                                                                                                                                                                                                                 | C3           | -5.333399693                      | -4.370813106  | -6.685025176 |
|                                                                                                                                                                                                                                                 | C4           | -5.429240816                      | -5.540167147  | -5.711115548 |
|                                                                                                                                                                                                                                                 | C5           | -5.148603882                      | -7.939656454  | -5.335912845 |
|                                                                                                                                                                                                                                                 | C6           | -4.035921946                      | -7.948046425  | -4.282060460 |
|                                                                                                                                                                                                                                                 | C7           | -1.852113601                      | -7.113230485  | -3.582004107 |
|                                                                                                                                                                                                                                                 | C8           | -2.279494296                      | -6.137703121  | -2.479212451 |
|                                                                                                                                                                                                                                                 | C9           | -3.518378043                      | -4.086381972  | -1.969246753 |
|                                                                                                                                                                                                                                                 | C10          | -4.519700410                      | -4.746362614  | -1.010637289 |
|                                                                                                                                                                                                                                                 | C11          | -6.388779399                      | -6.252972954  | -0.708736948 |
|                                                                                                                                                                                                                                                 | C12          | -5.813535397                      | -7.328648696  | 0.224478463  |
|                                                                                                                                                                                                                                                 | C13          | -4.509345949                      | -9.399642999  | 0.381124758  |
|                                                                                                                                                                                                                                                 | C14          | -3.179530244                      | -9.316636617  | 1.142944081  |
|                                                                                                                                                                                                                                                 | C15          | -0.875338648                      | -8.444275250  | 1.146912062  |
|                                                                                                                                                                                                                                                 | C16          | -0.627515855                      | -7.112695181  | 1.859037905  |
|                                                                                                                                                                                                                                                 | C17          | -1.478223267                      | -4.839568972  | 2.282372125  |
|                                                                                                                                                                                                                                                 | C18          | -2.491159138                      | -4.724492533  | 3.438815411  |
|                                                                                                                                                                                                                                                 | C19          | -1.521483994                      | -3.677805110  | 1.265986591  |
|                                                                                                                                                                                                                                                 | C20          | -1.615298539                      | -2.325928760  | 1.978558109  |
|                                                                                                                                                                                                                                                 | C21          | -0.307509138                      | -3.750496633  | 0.332783965  |
|                                                                                                                                                                                                                                                 | C22          | -4.833994006                      | -4.494664541  | 4.136146156  |
|                                                                                                                                                                                                                                                 | C23          | -5.108139850                      | -5.788901595  | 4.922412410  |
|                                                                                                                                                                                                                                                 | C24          | -6.114234748                      | -3.876573576  | 3.522827321  |
|                                                                                                                                                                                                                                                 | C25          | -7.248139454                      | -3.807523476  | 4.552259874  |
|                                                                                                                                                                                                                                                 | C26          | -5.821454446                      | -2.478991323  | 2.960375982  |
|                                                                                                                                                                                                                                                 | C27          | -5.628835002                      | -8.156216938  | 4.885974621  |
|                                                                                                                                                                                                                                                 | C28          | -4.616424640                      | -8.494377837  | 5.963239580  |
|                                                                                                                                                                                                                                                 | C29          | 8.401889445                       | -10.602940218 | 0.164875793  |
|                                                                                                                                                                                                                                                 | C30          | 8.439506101                       | -9.345015627  | 1.025035147  |
|                                                                                                                                                                                                                                                 | C31          | 7.108821792                       | -8.068984109  | 2.698035117  |
|                                                                                                                                                                                                                                                 | C32          | 7.322961329                       | -8.403091585  | 4.185787805  |
|                                                                                                                                                                                                                                                 | C33          | 5.668211491                       | -7.605778544  | 2.424490464  |
|                                                                                                                                                                                                                                                 | C34          | 5.305034824                       | -6.330928571  | 3.182630954  |
|                                                                                                                                                                                                                                                 | C35          | 4.015513476                       | -5.699862177  | 2.657258949  |
| C36                                                                                                                                                                                                                                             | 2.793863460  | -4.017864621                      | 4.061157498   |              |
| C37                                                                                                                                                                                                                                             | 8.372375767  | -7.665009869                      | 6.275898618   |              |
| C38                                                                                                                                                                                                                                             | 7.738817813  | -6.603086429                      | 7.145638880   |              |
| C39                                                                                                                                                                                                                                             | -1.471821377 | -0.728848445                      | -5.950087616  |              |
| C40                                                                                                                                                                                                                                             | -2.742493626 | -0.125260275                      | -5.324999869  |              |
| C41                                                                                                                                                                                                                                             | -0.371610481 | -0.809261890                      | -4.871427439  |              |
| C42                                                                                                                                                                                                                                             | 0.825341109  | -1.718494653                      | -5.218198463  |              |
| C43                                                                                                                                                                                                                                             | 1.965356388  | -1.062058403                      | -5.996220242  |              |
| C44                                                                                                                                                                                                                                             | -3.769088745 | 2.089604076                       | -4.851100897  |              |
| C45                                                                                                                                                                                                                                             | -5.253688725 | 1.730224909                       | -4.984959371  |              |
| C46                                                                                                                                                                                                                                             | -3.481584902 | 3.523790728                       | -5.320024745  |              |
| C47                                                                                                                                                                                                                                             | -6.969336655 | 0.624846312                       | -6.335543970  |              |
| C48                                                                                                                                                                                                                                             | -7.442660024 | -0.447889748                      | -5.346285394  |              |
| C49                                                                                                                                                                                                                                             | -6.837171934 | -2.037578711                      | -3.582580653  |              |
| C50                                                                                                                                                                                                                                             | -6.675932819 | -1.553424212                      | -2.138809194  |              |
| C51                                                                                                                                                                                                                                             | -6.040545161 | 0.244136148                       | -0.595652464  |              |
| C52                                                                                                                                                                                                                                             | -7.375860989 | 0.626242953                       | 0.061653586   |              |
| C53                                                                                                                                                                                                                                             | -5.171292343 | 1.511944725                       | -0.597666219  |              |
| C54                                                                                                                                                                                                                                             | -3.784058933 | 1.300551090                       | -1.101620582  |              |
| C55                                                                                                                                                                                                                                             | -3.046316313 | 0.176243422                       | -1.408963925  |              |

|      |               |              |              |
|------|---------------|--------------|--------------|
| C56  | -1.760158046  | 1.840251853  | -1.847399279 |
| C57  | -9.516891530  | 1.759431242  | -0.331255157 |
| C58  | -10.259556990 | 0.785542299  | 0.580343986  |
| C59  | -10.367906076 | 2.095902957  | -1.578569310 |
| C60  | -11.472429932 | 3.095820697  | -1.399718493 |
| C61  | -12.404658244 | 3.250016951  | -0.392113304 |
| C62  | -12.716418915 | 4.773565625  | -1.970674754 |
| C63  | 3.883771029   | -1.211351114 | 9.144602062  |
| C64  | 5.274904807   | -1.806479424 | 9.256518255  |
| C65  | 3.360272705   | -1.547019696 | 7.724870475  |
| C66  | 1.954371737   | -1.051685809 | 7.480323827  |
| C67  | 0.830911034   | -1.853794170 | 7.751697058  |
| C68  | 1.732256168   | 0.239317210  | 6.970400104  |
| C69  | -0.468848003  | -1.391871515 | 7.509204488  |
| C70  | 0.443692003   | 0.721195284  | 6.743680149  |
| C71  | -0.657282294  | -0.100305151 | 7.001284708  |
| C72  | 0.779128218   | 5.828204945  | 6.597964222  |
| C73  | -0.450044954  | 6.708459095  | 6.304316740  |
| C74  | 0.876106855   | 4.702668300  | 5.575664307  |
| C75  | -1.234597296  | 8.939859560  | 5.583391196  |
| C76  | -1.927958921  | 8.800181838  | 4.225574175  |
| C77  | -2.029610936  | 7.465164331  | 2.124639688  |
| C78  | -2.896156555  | 6.191816664  | 2.296352805  |
| C79  | -0.887283413  | 7.264043776  | 1.102596748  |
| C80  | -1.231184939  | 6.745140152  | -0.298827968 |
| C81  | -1.893366936  | 7.745260153  | -1.260987750 |
| C82  | -4.206281627  | 8.672345755  | -1.151631938 |
| C83  | -3.105228167  | 3.925864342  | 3.200837279  |
| C84  | -4.307731023  | 4.066501734  | 4.145014668  |
| C85  | -2.217282021  | 2.781621214  | 3.731123091  |
| C86  | -5.004220308  | 4.903255588  | 6.339294961  |
| C87  | -6.011753702  | 6.036235916  | 6.450372129  |
| C88  | -6.943635052  | 8.028629515  | 5.393343889  |
| C89  | -8.455998826  | 7.896861610  | 5.090837120  |
| C90  | -6.319959217  | 9.161562009  | 4.571757299  |
| C91  | -6.431027855  | 8.964234619  | 3.063674224  |
| C92  | -10.232985123 | 6.526295165  | 4.106729582  |
| C93  | -11.268979509 | 6.527428091  | 5.220612327  |
| C94  | -10.313091952 | 5.201646817  | 3.297070799  |
| C95  | -9.413990483  | 5.228222878  | 2.082521152  |
| C96  | -9.872352657  | 5.760596263  | 0.869088021  |
| C97  | -8.081149537  | 4.788999636  | 2.150784691  |
| C98  | -9.024530892  | 5.876344253  | -0.235253364 |
| C99  | -7.209274506  | 4.922961862  | 1.066251867  |
| C100 | -7.692240535  | 5.475133790  | -0.117950135 |
| C101 | 9.333798285   | 3.867132886  | -3.392799204 |
| C102 | 7.979250240   | 3.718354075  | -4.064030508 |
| C103 | 5.524626220   | 3.823722891  | -3.717289088 |
| C104 | 4.729283165   | 5.132235652  | -3.661057725 |
| C105 | 3.665542336   | 6.759649180  | -2.155259782 |
| C106 | 4.077540595   | 7.561566003  | -0.924423259 |
| C107 | 5.147298485   | 7.648712669  | 1.257454493  |
| C108 | 6.015601074   | 8.876320749  | 1.061859535  |
| C109 | 4.478074412   | 4.252671329  | -8.126236943 |
| C110 | 3.035926304   | 4.773280561  | -8.164485087 |
| C111 | 4.519119470   | 2.842112825  | -7.493448985 |
| C112 | 5.849960551   | 2.131793284  | -7.807447362 |
| C113 | 6.000265558   | 0.878874124  | -6.974364543 |
| C114 | 1.225854270   | 5.911655696  | -6.974972163 |
| C115 | 1.218475766   | 7.256856044  | -6.277851501 |
| C116 | 0.159848800   | 4.910177750  | -6.470931065 |
| C117 | 0.588850037   | 4.244704382  | -5.193541377 |
| C118 | 0.388666841   | 4.869957512  | -3.952444679 |
| C119 | 1.309670167   | 3.038865580  | -5.238636960 |
| C120 | 0.939604491   | 4.326098193  | -2.789892700 |
| C121 | 1.860713151   | 2.498870476  | -4.075155021 |
| C122 | 1.698159238   | 3.155061559  | -2.851706191 |
| C123 | 11.196270649  | -0.744028819 | 0.261384322  |
| C124 | 11.551345657  | -1.494958371 | 1.555082140  |
| C125 | 10.080925399  | -1.486387307 | -0.489333785 |
| C126 | 9.504728555   | -0.794324727 | -1.681952876 |
| C127 | 10.168263591  | -0.394272585 | -2.823999636 |
| C128 | 7.987706520   | -0.158745934 | -3.124517254 |
| C129 | 12.160000130  | -3.563512620 | 2.659400216  |
| C130 | 13.271568626  | -2.918571268 | 3.457735660  |
| C131 | 4.133958172   | -4.469893973 | -3.029664793 |
| C132 | 5.041904042   | -4.726299765 | -1.831181786 |
| C133 | 6.378943691   | -3.924177779 | -1.855623068 |
| C134 | 7.343799308   | -4.553713050 | -2.895824839 |
| C135 | 8.784763238   | -4.042476080 | -2.845997098 |
| C136 | 9.762956360   | -4.791566929 | -3.778190995 |
| C137 | 7.036525188   | -4.014716579 | -0.468569217 |

|       |              |               |              |
|-------|--------------|---------------|--------------|
| C138  | 3.958008882  | 1.197998371   | 1.170994095  |
| Fe139 | 5.620924512  | 1.490017887   | -0.016230138 |
| Fe140 | 1.819387143  | 1.096730039   | 1.190814841  |
| Fe141 | 3.861776139  | 1.459754788   | 3.167752955  |
| Fe142 | 4.071042714  | 3.155395350   | 1.204510434  |
| Fe143 | 2.214461542  | 3.577754581   | 2.979744419  |
| Fe144 | 5.171192838  | -0.303659795  | 1.785948619  |
| Fe145 | 3.705431921  | -0.058458345  | -0.323030403 |
| H146  | -0.527302620 | -5.495935747  | -8.052832535 |
| H147  | -0.524001154 | -3.880250704  | -8.267974285 |
| H148  | -4.774412049 | -4.377013058  | -8.746125778 |
| H149  | -2.547089415 | -3.946985438  | -9.539615126 |
| H150  | -2.525576699 | -5.704232072  | -9.436768944 |
| H151  | -5.018081635 | -3.498296557  | -6.093344031 |
| H152  | -4.895122435 | -6.862325901  | -7.179774869 |
| H153  | -6.338150485 | -4.168748101  | -7.080121027 |
| H154  | -5.046208261 | -8.835460880  | -5.962649391 |
| H155  | -2.844405511 | -6.722088540  | -5.437710858 |
| H156  | -6.096975423 | -8.013669838  | -4.786989879 |
| H157  | -2.744153845 | -3.606683349  | -1.358366890 |
| H158  | -3.041453079 | -4.867454157  | -3.905677204 |
| H159  | -0.943259776 | -6.738325345  | -4.072698461 |
| H160  | -6.879870887 | -5.506377799  | -0.070368414 |
| H161  | -5.483078193 | -5.679594691  | -2.581464507 |
| H162  | -1.615457247 | -8.070905852  | -3.103447502 |
| H163  | -4.019893043 | -3.303888316  | -2.553807627 |
| H164  | -4.742175563 | -8.147530375  | -1.339835425 |
| H165  | -7.147030857 | -6.721328962  | -1.351403416 |
| H166  | -0.271743907 | -4.708442051  | -0.205241299 |
| H167  | -0.339068805 | -2.943632959  | -0.415623220 |
| H168  | 0.634134193  | -3.651315811  | 0.897500456  |
| H169  | -2.437556563 | -3.801871787  | 0.670152168  |
| H170  | -4.422363976 | -10.225460859 | -0.341187946 |
| H171  | -5.049374836 | -2.497738529  | 2.179495540  |
| H172  | -5.386505034 | -6.900132369  | 3.180119963  |
| H173  | -7.540690154 | -4.799731446  | 4.924771593  |
| H174  | -0.782012846 | -2.188707272  | 2.685219835  |
| H175  | -2.547691112 | -2.226498750  | 2.551640980  |
| H176  | 3.239173645  | -1.730347368  | 9.879215699  |
| H177  | -6.727226778 | -2.045459075  | 2.512494286  |
| H178  | -8.134261131 | -3.342678664  | 4.095125991  |
| H179  | -5.486658226 | -1.804988501  | 3.765538503  |
| H180  | -6.951329220 | -3.194219454  | 5.418058123  |
| H181  | -6.438785668 | -4.528238988  | 2.691659282  |
| H182  | -4.427351374 | -3.800150898  | 4.886730958  |
| H183  | -4.087512919 | -4.672341287  | 2.123513206  |
| H184  | -1.590096105 | -1.507766947  | 1.245682116  |
| H185  | -1.255361330 | 2.800285703   | 3.195859380  |
| H186  | -2.727028274 | 1.837160983   | 3.495405181  |
| H187  | -2.047158503 | 2.012941622   | 5.539499493  |
| H188  | -2.585094150 | -0.273828474  | 6.869411152  |
| H189  | 0.288373601  | 1.714568396   | 6.322231375  |
| H190  | 2.585242074  | 0.868609453   | 6.706637130  |
| H191  | 0.969714072  | -2.865063998  | 8.145011996  |
| H192  | -2.264060946 | -6.303281875  | 0.933197560  |
| H193  | -0.095484616 | -8.560477911  | 0.379703792  |
| H194  | -0.734943142 | -9.239004727  | 1.890830288  |
| H195  | -2.364055425 | -8.092820356  | -0.325195295 |
| H196  | -5.273423007 | -9.665434823  | 1.121099304  |
| H197  | -1.328368761 | -2.040859090  | 7.696258616  |
| H198  | -0.505244411 | -4.812725178  | 2.787665668  |
| H199  | -6.633601258 | -8.141008004  | 5.338115138  |
| H200  | -5.601209185 | -8.969905549  | 4.144660599  |
| H201  | -3.590222115 | -8.094412782  | 5.788547748  |
| H202  | 9.458053648  | -7.683067788  | 6.459504409  |
| H203  | 3.995771273  | -1.129789086  | -6.237000962 |
| H204  | 4.981042901  | -2.730382730  | -2.942059254 |
| H205  | 5.862235871  | 1.841490376   | -8.867607415 |
| H206  | 6.695310585  | 2.810590514   | -7.623462848 |
| H207  | 3.687851201  | 2.229685830   | -7.876356315 |
| H208  | 2.184269281  | 7.811230910   | -6.343916434 |
| H209  | 4.737561010  | 4.137927136   | -9.190243243 |
| H210  | -0.020248375 | 0.210032568   | -4.650986741 |
| H211  | 0.484223760  | -2.579476608  | -5.820738944 |
| H212  | 3.172640267  | 5.446344188   | -6.205461317 |
| H213  | 0.961251743  | 6.160073625   | -8.022937169 |
| H214  | 5.292443129  | 5.329407034   | -6.547476006 |
| H215  | 3.389118907  | -2.197974730  | -4.975539607 |
| H216  | 4.365521955  | 2.927554878   | -6.407001803 |
| H217  | 6.362443146  | 4.969072642   | -7.743891212 |
| H218  | -1.449671668 | -0.259944466  | -7.962651389 |
| H219  | -0.828938501 | -1.171078771  | -3.940158515 |

|      |               |              |              |
|------|---------------|--------------|--------------|
| H220 | 7.076066104   | 1.926164285  | -5.706774630 |
| H221 | 1.230140141   | -2.148698471 | -4.289742890 |
| H222 | -5.589499711  | -0.533301507 | 0.036701972  |
| H223 | -3.360553088  | -0.860436858 | -1.336567488 |
| H224 | -7.895935872  | -2.301573797 | -3.712624049 |
| H225 | -5.489072804  | -0.865895967 | -4.757867085 |
| H226 | -8.088760182  | 1.125904729  | -1.796337343 |
| H227 | -12.561050002 | 2.727623286  | 0.544835854  |
| H228 | -10.133064857 | -0.284705980 | 0.287554432  |
| H229 | -10.750682951 | 1.154852801  | -2.013122503 |
| H230 | -9.293166638  | 2.676191313  | 0.238038750  |
| H231 | -13.162128808 | 5.613810993  | -2.495309063 |
| H232 | -5.157159613  | 1.889817239  | 0.438876931  |
| H233 | -5.672823242  | 2.283379405  | -1.207791983 |
| H234 | -13.961964628 | 4.709216207  | -0.244135981 |
| H235 | -9.689225066  | 2.526584234  | -2.331730743 |
| H236 | -5.985485189  | 0.309397603  | -2.744207591 |
| H237 | -6.262612647  | -2.969415873 | -3.690483521 |
| H238 | -7.692883901  | 1.448364451  | -6.255630789 |
| H239 | -0.910636065  | 2.458140952  | -2.131511897 |
| H240 | -7.044435487  | 0.213482415  | -7.350417417 |
| H241 | 4.112921983   | 0.441322526  | 10.334359855 |
| H242 | 3.094050057   | 0.677279899  | 9.077699658  |
| H243 | -1.362300527  | 5.194801839  | 3.306239014  |
| H244 | -3.515057257  | 3.616806681  | 2.227779814  |
| H245 | -3.203040014  | 5.330853648  | 5.323589298  |
| H246 | -3.223814116  | 3.350203878  | -1.359838781 |
| H247 | -4.331637759  | 4.792851951  | -2.867837296 |
| H248 | -4.235677176  | 5.309562783  | -5.042692153 |
| H249 | -5.275950556  | 4.999938840  | -1.615162462 |
| H250 | -2.411824586  | 3.731888053  | -5.152691127 |
| H251 | -3.697336137  | 3.609191029  | -6.397105174 |
| H252 | -5.277847273  | 9.316701583  | 4.885536009  |
| H253 | -6.878599747  | 10.078404277 | 4.815714522  |
| H254 | -4.423774999  | 9.427033233  | 2.824691984  |
| H255 | -5.342786588  | 9.055490037  | 1.369118098  |
| H256 | -4.455296986  | 10.705414471 | -1.040106963 |
| H257 | -1.547590198  | 7.558647039  | -2.289216984 |
| H258 | -9.394670479  | 6.287938591  | -1.178129200 |
| H259 | -7.696572427  | 4.319909855  | 3.061145918  |
| H260 | -5.854503890  | 7.465914689  | -0.904132373 |
| H261 | -0.169452818  | 6.555016170  | 1.544743702  |
| H262 | -0.608330319  | 7.329293616  | 3.708281521  |
| H263 | -1.835186972  | 5.826058838  | -0.246756325 |
| H264 | -4.887027759  | 0.871772363  | -6.800504586 |
| H265 | -0.817045518  | 9.953087717  | 5.646478397  |
| H266 | -2.127314278  | 1.551105937  | -6.197547599 |
| H267 | -0.354704758  | 8.225823846  | 1.014500669  |
| H268 | -6.162720796  | 4.628674303  | 1.159377408  |
| H269 | -2.028386517  | 8.856047285  | 6.339273979  |
| H270 | -2.887642225  | 10.198547583 | -1.570895065 |
| H271 | -6.196604876  | 9.124108803  | -1.244717211 |
| H272 | -0.006929960  | 0.044826850  | -7.170516006 |
| H273 | -1.749808173  | -1.763640337 | -6.230789397 |
| H274 | -10.909749879 | 6.090107731  | 0.776495177  |
| H275 | -3.556642085  | 2.018712880  | -3.774146205 |
| H276 | -2.713892674  | 8.258142766  | 1.804873300  |
| H277 | -1.587740067  | 8.766295129  | -0.998318976 |
| H278 | -0.277478356  | 6.446502756  | -0.757465676 |
| H279 | -3.755627107  | 6.704834962  | -1.423443630 |
| H280 | -5.568101433  | 3.958268861  | 6.334811806  |
| H281 | -5.542804806  | 6.623974658  | 4.552084649  |
| H282 | -6.924311460  | 8.341158130  | 6.449259640  |
| H283 | -4.391006565  | 4.928981519  | 7.250392113  |
| H284 | -8.172561763  | 6.025288903  | 4.364080309  |
| H285 | 9.281103974   | 4.634066303  | -2.606227764 |
| H286 | 9.517101463   | 2.898030002  | -2.884057189 |
| H287 | 10.815969149  | 0.233540195  | 0.592816205  |
| H288 | 11.280009759  | 4.072733911  | -3.964302407 |
| H289 | 10.282614182  | 3.590873060  | -5.170524848 |
| H290 | 1.765916930   | 4.105286319  | 5.813769050  |
| H291 | -0.188352972  | 4.766890071  | 8.047872985  |
| H292 | 0.782067497   | 8.261248709  | 5.755983925  |
| H293 | -0.016489178  | 4.064778629  | 5.638156342  |
| H294 | 0.725453482   | 5.983927877  | 8.647732802  |
| H295 | 5.699939752   | 6.949393182  | 1.904595162  |
| H296 | 1.689119857   | 6.445556073  | 6.542489264  |
| H297 | 4.971364363   | -8.423329945 | 2.674647708  |
| H298 | 7.802471148   | -7.276113963 | 2.391120344  |
| H299 | 5.152140313   | 5.985004720  | -0.074685016 |
| H300 | 2.036040200   | -2.477595767 | 5.193835653  |
| H301 | 3.770874734   | 7.413037809  | -3.030127424 |

|  |       |               |               |              |
|--|-------|---------------|---------------|--------------|
|  | H302  | 2.412751799   | 1.556227022   | -4.111773874 |
|  | H303  | 2.589610507   | 6.544000156   | -2.042152984 |
|  | H304  | 3.153586775   | -6.348679606  | 2.850969779  |
|  | H305  | 4.569367443   | 4.859233128   | -1.651161648 |
|  | H306  | 4.075582186   | -5.563107179  | 1.566463954  |
|  | H307  | 5.594940992   | -7.424922311  | 1.340671758  |
|  | H308  | 6.114267256   | -5.594757670  | 3.067787719  |
|  | H309  | 5.196178679   | -6.529708526  | 4.260700714  |
|  | H310  | 0.004589115   | 4.164073394   | -7.263654531 |
|  | H311  | 6.762235856   | -10.031397644 | 1.871271538  |
|  | H312  | 8.112106196   | -10.268792522 | -0.843291319 |
|  | H313  | 2.117977141   | 2.727684039   | -1.941103123 |
|  | H314  | 7.885068267   | -12.248560366 | 1.290640531  |
|  | H315  | 7.107905635   | -12.170300838 | -0.149614850 |
|  | H316  | 4.592173312   | -3.736012801  | 3.171984630  |
|  | H317  | 0.786107585   | 4.797495694   | -1.816777887 |
|  | H318  | 1.441606234   | 2.519403956   | -6.190927370 |
|  | H319  | 11.360582220  | -5.519105194  | -0.254300823 |
|  | H320  | 10.471348199  | -2.461567318  | -0.829147533 |
|  | H321  | 8.962679234   | -5.440292654  | 0.644799863  |
|  | H322  | 11.645543216  | -5.121213919  | -1.728509768 |
|  | H323  | 6.594263317   | 8.895887990   | 0.107215199  |
|  | H324  | 7.145581378   | -3.212085074  | 1.981688949  |
|  | H325  | 5.234610863   | -5.801979453  | -1.746376205 |
|  | H326  | 7.053768448   | 4.213755108   | -2.303993119 |
|  | H327  | 7.344309478   | -5.639910770  | -2.712127727 |
|  | H328  | 9.343750556   | 0.300467062   | -4.674223729 |
|  | H329  | 7.051837739   | 0.041707912   | -3.629259737 |
|  | H330  | 9.439278978   | -10.968915655 | 0.087922243  |
|  | H331  | 3.591760213   | -2.134819648  | 4.479052620  |
|  | H332  | 8.443841673   | -4.502672354  | 3.499896023  |
|  | H333  | 7.015979477   | -2.454709797  | 3.326929030  |
|  | H334  | 8.471784989   | -6.669758684  | 4.373807075  |
|  | H335  | 1.497628834   | -5.611768393  | 3.667946373  |
|  | H336  | 8.805100227   | -2.981090484  | -3.136284174 |
|  | H337  | 9.175231952   | -4.103419183  | -1.821321952 |
|  | H338  | 6.921375885   | -4.398258802  | -3.900544829 |
|  | H339  | 5.050290917   | 3.057237101   | -3.085170765 |
|  | H340  | -0.182046425  | 5.800840060   | -3.910375122 |
|  | H341  | -0.778380793  | 5.471764946   | -6.341178303 |
|  | H342  | 4.457839677   | -4.418836319  | -0.947385160 |
|  | H343  | 9.475029374   | -5.385454109  | 2.735066222  |
|  | H344  | 9.683254224   | -6.763265835  | 1.005583475  |
|  | H345  | 0.968641206   | -4.481576970  | 4.852066761  |
|  | H346  | 11.223888666  | -0.393433088  | -3.068239440 |
|  | H347  | 9.268926647   | -1.714472211  | 0.212567386  |
|  | H348  | 5.534798350   | 3.483536143   | -4.754392703 |
|  | H349  | 4.227982307   | 7.941289945   | 1.788283283  |
|  | H350  | 3.404510251   | -2.639214362  | 7.600269025  |
|  | H351  | 4.043905595   | -1.096920171  | 6.986943630  |
|  | H352  | 13.076031317  | 0.010035431   | -0.052893035 |
|  | H353  | 12.803267753  | -1.388464641  | -0.858764916 |
|  | H354  | 12.513714474  | -4.560878608  | 2.352895023  |
|  | H355  | 11.829542699  | -3.328371385  | 0.565249321  |
|  | H356  | 13.978586358  | -2.297240558  | 2.856857311  |
|  | H357  | 11.275603383  | -3.708272630  | 3.299700382  |
|  | H358  | 6.073256002   | -1.185544157  | 8.782278998  |
|  | H359  | -10.869416872 | 6.311497476   | 6.239002604  |
|  | H360  | 7.955206272   | -8.636721522  | 6.594638019  |
|  | H361  | 6.802842448   | -6.148424848  | 6.739003885  |
|  | H362  | -10.471088983 | 7.367535345   | 3.433587899  |
|  | H363  | -10.044521594 | 4.361750057   | 3.957279659  |
|  | H364  | -11.362045881 | 5.062918385   | 2.997459493  |
|  | H365  | 0.941822108   | -0.939082424  | 2.553557859  |
|  | H366  | -7.306249017  | 5.824272173   | -1.992616562 |
|  | H367  | 2.514481933   | -1.242757398  | 2.145404955  |
|  | H368  | 1.328008942   | -1.457777496  | 1.008465048  |
|  | M0369 | 6.201435732   | -1.099711111  | -0.593390753 |
|  | N370  | 1.624589827   | -0.874237516  | 1.795247822  |
|  | N371  | -0.014449541  | 1.198724140   | 1.160315367  |
|  | N372  | -1.136770893  | 1.242928950   | 1.155438892  |
|  | N373  | -0.803703101  | -4.760379039  | -8.708018318 |
|  | N374  | -4.435066263  | -4.589048183  | -7.810664023 |
|  | N375  | -5.153233843  | -6.772421758  | -6.199845349 |
|  | N376  | -2.886477938  | -7.298282580  | -4.593054455 |
|  | N377  | -2.925446548  | -5.027148261  | -2.906948379 |
|  | N378  | -5.402588359  | -5.611673152  | -1.563285273 |
|  | N379  | -4.942691111  | -8.208809549  | -0.337118515 |
|  | N380  | -2.186451261  | -8.601648691  | 0.545014919  |
|  | N381  | -1.542759632  | -6.140969340  | 1.632208002  |
|  | N382  | -3.809207716  | -4.688451644  | 3.108787632  |
|  | N383  | -5.302990185  | -6.920154733  | 4.199454455  |

|      |               |               |              |
|------|---------------|---------------|--------------|
| N384 | 7.436700657   | -11.605250153 | 0.634544718  |
| N385 | 7.403901444   | -9.231637204  | 1.879257658  |
| N386 | 3.805586003   | -4.385634996  | 3.268232458  |
| N387 | 1.736430746   | -4.827570275  | 4.282795610  |
| N388 | 2.833114681   | -2.813480096  | 4.659845975  |
| N389 | 8.075277365   | -7.501737033  | 4.866213693  |
| N390 | -1.039381459  | 0.087376322   | -7.092784179 |
| N391 | 3.201908489   | -1.518640798  | -5.719944397 |
| N392 | -2.885582729  | 1.201836117   | -5.590243160 |
| N393 | -5.618723900  | 1.117562453   | -6.137565780 |
| N394 | -6.484824703  | -1.094369994  | -4.628160904 |
| N395 | -6.219931569  | -0.284347986  | -1.945200095 |
| N396 | -2.944007891  | 2.362602409   | -1.386808439 |
| N397 | -1.795942633  | 0.516008764   | -1.870506780 |
| N398 | -8.297297876  | 1.125921573   | -0.800600762 |
| N399 | -11.679940095 | 4.054192639   | -2.380845402 |
| N400 | -13.182541170 | 4.324377742   | -0.770688017 |
| N401 | 3.979809407   | 0.236909662   | 9.341088215  |
| N402 | 0.715609136   | 5.239538333   | 7.944946301  |
| N403 | -0.187276121  | 7.977279299   | 5.872288814  |
| N404 | -1.420704630  | 7.872230165   | 3.389425682  |
| N405 | -3.357748361  | 7.653841024   | -1.252270172 |
| N406 | -3.787010139  | 9.953102245   | -1.172123566 |
| N407 | -5.521614601  | 8.433960677   | -0.924943882 |
| N408 | -2.357493364  | 5.172497729   | 3.023281796  |
| N409 | -4.140441692  | 4.946939699   | 5.173921589  |
| N410 | -6.187050761  | 6.791396647   | 5.324976798  |
| N411 | -5.331066971  | 9.330602475   | 2.350575694  |
| N412 | -8.888745561  | 6.690887976   | 4.643924249  |
| N413 | 10.357794893  | 4.233549483   | -4.375909181 |
| N414 | 6.908280013   | 4.012968990   | -3.297247514 |
| N415 | 4.400825892   | 5.535188910   | -2.415681994 |
| N416 | 4.857618931   | 6.963956251   | 0.009749838  |
| N417 | 5.396279090   | 5.253705816   | -7.566926982 |
| N418 | 2.579093224   | 5.389922190   | -7.039278944 |
| N419 | 12.370601616  | -0.498475435  | -0.593275276 |
| N420 | 8.135454216   | -0.625299838  | -1.884372484 |
| N421 | 9.195020239   | 0.002019129   | -3.713906912 |
| N422 | 11.858818954  | -2.816285051  | 1.451509646  |
| O423 | -2.615066707  | -4.890588277  | -6.478217193 |
| O424 | -5.750970692  | -5.342977173  | -4.526351566 |
| O425 | -4.201012437  | -8.553554862  | -3.208862438 |
| O426 | -2.064588397  | -6.359966190  | -1.273189689 |
| O427 | -4.506549660  | -4.503385615  | 0.206042455  |
| O428 | -6.185280354  | -7.405849979  | 1.407986401  |
| O429 | -3.037526554  | -9.930636380  | 2.209702486  |
| O430 | 0.380398156   | -6.980921789  | 2.581386499  |
| O431 | -2.086966526  | -4.658531874  | 4.611379554  |
| O432 | -5.150322213  | -5.795717818  | 6.164821686  |
| O433 | -4.872978415  | -9.207313833  | 6.922078146  |
| O434 | 9.361369477   | -8.517261263  | 0.874087547  |
| O435 | 6.820237127   | -9.421305302  | 4.692730785  |
| O436 | 8.190392989   | -6.261973567  | 8.227995079  |
| O437 | -3.551656339  | -0.791340337  | -4.652410352 |
| O438 | 1.766511755   | -0.177239551  | -6.860826877 |
| O439 | -6.057846777  | 1.982332935   | -4.071161904 |
| O440 | -4.300158738  | 4.452820887   | -4.584357060 |
| O441 | -8.657081829  | -0.682566148  | -5.255508266 |
| O442 | -6.963604016  | -2.314939784  | -1.206361103 |
| O443 | -7.562011051  | 0.570498504   | 1.283135699  |
| O444 | -10.982147500 | 1.115580397   | 1.506369482  |
| O445 | 5.529861578   | -2.876022715  | 9.791689694  |
| O446 | -1.907881282  | 0.410121068   | 6.713775158  |
| O447 | -1.612861312  | 6.294411978   | 6.456108323  |
| O448 | -2.903322176  | 9.533445587   | 3.965951795  |
| O449 | -4.025311499  | 6.131533434   | 1.786511242  |
| O450 | -5.319689012  | 3.370372336   | 3.993136902  |
| O451 | -1.997887831  | 2.903419074   | 5.139278701  |
| O452 | -6.634107500  | 6.228624169   | 7.502977022  |
| O453 | -9.224177490  | 8.843955479   | 5.313600062  |
| O454 | -7.472128507  | 8.551353097   | 2.532384382  |
| O455 | -12.458384959 | 6.721829996   | 5.023690453  |
| O456 | -6.791155195  | 5.656770509   | -1.180116932 |
| O457 | 7.894592245   | 3.306246532   | -5.247014440 |
| O458 | 4.438898863   | 5.769091189   | -4.696243379 |
| O459 | 3.654487265   | 8.722591934   | -0.786175856 |
| O460 | 6.119293923   | 9.765225454   | 1.891689639  |
| O461 | 2.323393641   | 4.619679809   | -9.171053455 |
| O462 | 5.491694158   | -0.198107872  | -7.268269652 |
| O463 | 6.699632041   | 1.001262237   | -5.827061713 |
| O464 | 0.243496961   | 7.750347442   | -5.728374374 |
| O465 | 11.598166337  | -0.914901837  | 2.657828934  |



|                                                                                                                                                                                                                                           |              |              |                                   |              |
|-------------------------------------------------------------------------------------------------------------------------------------------------------------------------------------------------------------------------------------------|--------------|--------------|-----------------------------------|--------------|
|                                                                                                                                                                                                                                           | O466         | 13.450344455 | -3.111804572                      | 4.652242293  |
|                                                                                                                                                                                                                                           | O467         | 4.166693540  | -3.219128022                      | -3.495604443 |
|                                                                                                                                                                                                                                           | O468         | 3.386242018  | -5.329145736                      | -3.496340725 |
|                                                                                                                                                                                                                                           | O469         | 10.940741346 | -5.016372827                      | -3.324268029 |
|                                                                                                                                                                                                                                           | O470         | 9.354328005  | -5.097860232                      | -4.933318719 |
|                                                                                                                                                                                                                                           | O471         | 7.245749583  | -2.886744221                      | 0.154684471  |
|                                                                                                                                                                                                                                           | O472         | 7.354776298  | -5.124273680                      | 0.004130441  |
|                                                                                                                                                                                                                                           | O473         | 6.080785919  | -2.559727606                      | -2.160130818 |
|                                                                                                                                                                                                                                           | O474         | 9.145359008  | -5.182587546                      | 3.654463922  |
|                                                                                                                                                                                                                                           | O475         | 7.016996551  | -3.357396450                      | 2.955335028  |
|                                                                                                                                                                                                                                           | O476         | -4.339896531 | 5.042675761                       | -1.908895828 |
|                                                                                                                                                                                                                                           | O477         | 12.101108274 | -5.249639522                      | -0.842534690 |
|                                                                                                                                                                                                                                           | O478         | 9.811447549  | -5.781340778                      | 1.036156897  |
|                                                                                                                                                                                                                                           | S479         | 1.008380781  | 5.334879963                       | 3.842197355  |
|                                                                                                                                                                                                                                           | S480         | 1.879415214  | 3.503081780                       | 0.681923266  |
|                                                                                                                                                                                                                                           | S481         | 5.063185731  | 0.500087326                       | -1.961399510 |
|                                                                                                                                                                                                                                           | S482         | 1.657846828  | 1.487815093                       | 3.551530859  |
|                                                                                                                                                                                                                                           | S483         | 1.741258095  | 0.330658038                       | -1.020547695 |
|                                                                                                                                                                                                                                           | S484         | 5.832158713  | 3.691404989                       | -0.065513241 |
|                                                                                                                                                                                                                                           | S485         | 4.323571682  | -2.015399920                      | 0.575275588  |
|                                                                                                                                                                                                                                           | S486         | 4.479289239  | 3.601453568                       | 3.398300775  |
|                                                                                                                                                                                                                                           | S487         | 7.188987983  | 0.295933859                       | 1.059587250  |
|                                                                                                                                                                                                                                           | S488         | 4.980689368  | -0.292221335                      | 3.979412827  |
|                                                                                                                                                                                                                                           | end          |              |                                   |              |
| <b>Fe2-NH3</b><br><b>2N2 dissociated</b><br><b>35, S=1</b><br><br><b>Fe(139) -2.403</b><br><b>Fe(140) 0.055</b><br><b>Fe(141) -2.559</b><br><b>Fe(142) 2.780</b><br><b>Fe(143) 3.197</b><br><b>Fe(144) 2.436</b><br><b>Fe(145) -2.120</b> |              |              | <b>bmexpprot2nh32n2xdtg.car 1</b> |              |
| 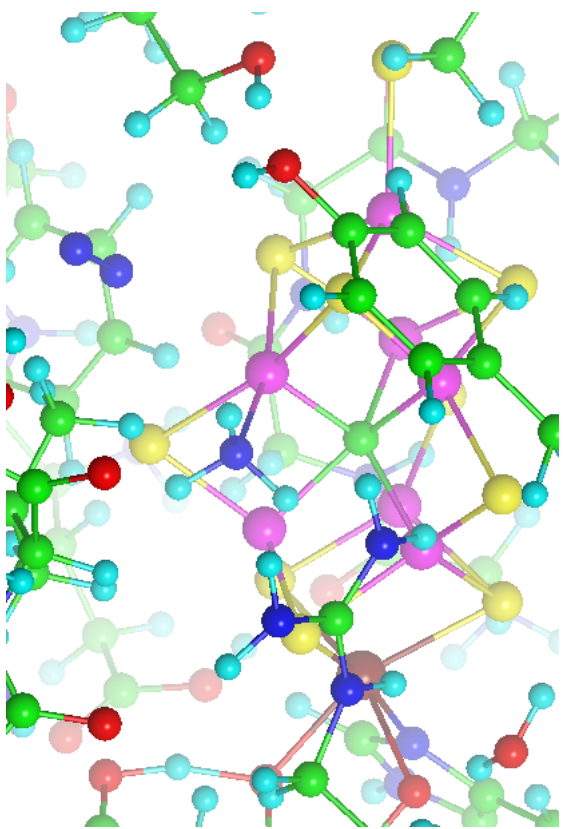                                                                                                                                                       | C1           | -3.089011829 | -4.745734287                      | -7.612890061 |
|                                                                                                                                                                                                                                           | C2           | -2.238763825 | -4.785016710                      | -8.887509816 |
|                                                                                                                                                                                                                                           | C3           | -5.333005298 | -4.372906971                      | -6.684884045 |
|                                                                                                                                                                                                                                           | C4           | -5.429680182 | -5.541781606                      | -5.711232749 |
|                                                                                                                                                                                                                                           | C5           | -5.146621636 | -7.939856694                      | -5.337888066 |
|                                                                                                                                                                                                                                           | C6           | -4.034315836 | -7.950744272                      | -4.282910652 |
|                                                                                                                                                                                                                                           | C7           | -1.852019781 | -7.115316448                      | -3.580255319 |
|                                                                                                                                                                                                                                           | C8           | -2.278817381 | -6.140711576                      | -2.478599432 |
|                                                                                                                                                                                                                                           | C9           | -3.519047100 | -4.089532866                      | -1.969598301 |
|                                                                                                                                                                                                                                           | C10          | -4.520470894 | -4.749377018                      | -1.009976167 |
|                                                                                                                                                                                                                                           | C11          | -6.388961903 | -6.257270508                      | -0.709227237 |
|                                                                                                                                                                                                                                           | C12          | -5.814006195 | -7.333150903                      | 0.223684920  |
|                                                                                                                                                                                                                                           | C13          | -4.508052916 | -9.403768125                      | 0.379168645  |
|                                                                                                                                                                                                                                           | C14          | -3.178381369 | -9.320015347                      | 1.142025079  |
|                                                                                                                                                                                                                                           | C15          | -0.874648294 | -8.446424545                      | 1.144975511  |
|                                                                                                                                                                                                                                           | C16          | -0.625411093 | -7.117491050                      | 1.858737761  |
|                                                                                                                                                                                                                                           | C17          | -1.469899848 | -4.843915158                      | 2.284040954  |
|                                                                                                                                                                                                                                           | C18          | -2.485029360 | -4.726234910                      | 3.438880787  |
|                                                                                                                                                                                                                                           | C19          | -1.514611990 | -3.687806060                      | 1.269121698  |
|                                                                                                                                                                                                                                           | C20          | -1.606004199 | -2.338666742                      | 1.981025179  |
|                                                                                                                                                                                                                                           | C21          | -0.301408847 | -3.753823861                      | 0.335073093  |
|                                                                                                                                                                                                                                           | C22          | -4.830554401 | -4.495115657                      | 4.133565860  |
|                                                                                                                                                                                                                                           | C23          | -5.105923317 | -5.790297984                      | 4.920694178  |
|                                                                                                                                                                                                                                           | C24          | -6.111949447 | -3.877034742                      | 3.521077608  |
|                                                                                                                                                                                                                                           | C25          | -7.245552195 | -3.809191127                      | 4.552048040  |
|                                                                                                                                                                                                                                           | C26          | -5.821125292 | -2.479860856                      | 2.958021866  |
|                                                                                                                                                                                                                                           | C27          | -5.625452204 | -8.158311111                      | 4.884288304  |
|                                                                                                                                                                                                                                           | C28          | -4.613366203 | -8.493630367                      | 5.961459520  |
|                                                                                                                                                                                                                                           | C29          | 8.402479720  | -10.602745236                     | 0.161997427  |
|                                                                                                                                                                                                                                           | C30          | 8.441103508  | -9.346166527                      | 1.023744864  |
|                                                                                                                                                                                                                                           | C31          | 7.111272415  | -8.069561510                      | 2.696774258  |
|                                                                                                                                                                                                                                           | C32          | 7.325727864  | -8.405466498                      | 4.184730556  |
|                                                                                                                                                                                                                                           | C33          | 5.670526853  | -7.606980582                      | 2.423815296  |
|                                                                                                                                                                                                                                           | C34          | 5.309385404  | -6.333343178                      | 3.184837678  |
|                                                                                                                                                                                                                                           | C35          | 4.020818914  | -5.699580489                      | 2.661391039  |
|                                                                                                                                                                                                                                           | C36          | 2.800291617  | -4.014678355                      | 4.063882419  |
|                                                                                                                                                                                                                                           | C37          | 8.373216314  | -7.668145662                      | 6.277736837  |
| C38                                                                                                                                                                                                                                       | 7.740672798  | -6.604382459 | 7.146783785                       |              |
| C39                                                                                                                                                                                                                                       | -1.466365859 | -0.726168287 | -5.946116717                      |              |
| C40                                                                                                                                                                                                                                       | -2.739639793 | -0.124609900 | -5.325569689                      |              |
| C41                                                                                                                                                                                                                                       | -0.364478660 | -0.806626166 | -4.868073240                      |              |
| C42                                                                                                                                                                                                                                       | 0.831076007  | -1.718062872 | -5.217254386                      |              |
| C43                                                                                                                                                                                                                                       | 1.970331608  | -1.061700378 | -5.995603720                      |              |
| C44                                                                                                                                                                                                                                       | -3.766769926 | 2.090305817  | -4.851526222                      |              |
| C45                                                                                                                                                                                                                                       | -5.251825918 | 1.730033981  | -4.985484622                      |              |
| C46                                                                                                                                                                                                                                       | -3.478720390 | 3.524297103  | -5.318866969                      |              |
| C47                                                                                                                                                                                                                                       | -6.968467850 | 0.626201959  | -6.335287531                      |              |
| C48                                                                                                                                                                                                                                       | -7.443046833 | -0.446024004 | -5.346369538                      |              |
| C49                                                                                                                                                                                                                                       | -6.837989006 | -2.039553139 | -3.585482990                      |              |
| C50                                                                                                                                                                                                                                       | -6.676681471 | -1.554562294 | -2.141591339                      |              |
| C51                                                                                                                                                                                                                                       | -6.036651215 | 0.243409276  | -0.600688828                      |              |
| C52                                                                                                                                                                                                                                       | -7.369896267 | 0.629058146  | 0.060454992                       |              |
| C53                                                                                                                                                                                                                                       | -5.164656029 | 1.509247897  | -0.605878640                      |              |
| C54                                                                                                                                                                                                                                       | -3.782733599 | 1.299254211  | -1.127813962                      |              |
| C55                                                                                                                                                                                                                                       | -3.051703293 | 0.174624909  | -1.456421131                      |              |
| C56                                                                                                                                                                                                                                       | -1.757152928 | 1.837927051  | -1.873588847                      |              |

|      |               |              |              |
|------|---------------|--------------|--------------|
| C57  | -9.512719267  | 1.763222011  | -0.328602430 |
| C58  | -10.254727595 | 0.788844019  | 0.582242042  |
| C59  | -10.363980674 | 2.098567268  | -1.573972757 |
| C60  | -11.469022061 | 3.096871821  | -1.394578479 |
| C61  | -12.402738678 | 3.249856811  | -0.388329998 |
| C62  | -12.713437592 | 4.774391353  | -1.966392606 |
| C63  | 3.882744073   | -1.212326198 | 9.149965154  |
| C64  | 5.274661007   | -1.806606450 | 9.261973605  |
| C65  | 3.361652629   | -1.547241258 | 7.729382255  |
| C66  | 1.957600163   | -1.049031086 | 7.482154771  |
| C67  | 0.833583401   | -1.850623929 | 7.752822277  |
| C68  | 1.738850181   | 0.239246866  | 6.964603794  |
| C69  | -0.465376747  | -1.387624205 | 7.508070905  |
| C70  | 0.450642561   | 0.722266151  | 6.737447139  |
| C71  | -0.651941792  | -0.096207269 | 6.997327675  |
| C72  | 0.778996515   | 5.832294259  | 6.598643220  |
| C73  | -0.450378984  | 6.712253342  | 6.304077131  |
| C74  | 0.876074480   | 4.705902827  | 5.578248946  |
| C75  | -1.233918282  | 8.942515381  | 5.581985642  |
| C76  | -1.926226969  | 8.802547789  | 4.223162262  |
| C77  | -2.023850303  | 7.469077183  | 2.121834166  |
| C78  | -2.887263124  | 6.192796993  | 2.294154530  |
| C79  | -0.882460212  | 7.267022015  | 1.099667462  |
| C80  | -1.227645261  | 6.744653429  | -0.300312775 |
| C81  | -1.891536440  | 7.743519705  | -1.263822523 |
| C82  | -4.203159991  | 8.670558657  | -1.151485607 |
| C83  | -3.089482659  | 3.931115202  | 3.217844696  |
| C84  | -4.302914637  | 4.076641694  | 4.149880251  |
| C85  | -2.203745570  | 2.798249249  | 3.777959883  |
| C86  | -5.008312321  | 4.906330371  | 6.345424478  |
| C87  | -6.016121869  | 6.037786486  | 6.456703676  |
| C88  | -6.941571190  | 8.029693360  | 5.394320166  |
| C89  | -8.453653851  | 7.897801716  | 5.090982566  |
| C90  | -6.317992050  | 9.162439407  | 4.572255087  |
| C91  | -6.430218334  | 8.966932342  | 3.064839084  |
| C92  | -10.230655701 | 6.525899081  | 4.107912375  |
| C93  | -11.265628416 | 6.527931965  | 5.222136626  |
| C94  | -10.311628784 | 5.200874031  | 3.296855189  |
| C95  | -9.411457794  | 5.229736940  | 2.082776648  |
| C96  | -9.870775507  | 5.758838916  | 0.868838577  |
| C97  | -8.079344024  | 4.788526375  | 2.151661186  |
| C98  | -9.023201871  | 5.874321908  | -0.235277128 |
| C99  | -7.207108333  | 4.922049144  | 1.067910222  |
| C100 | -7.691227746  | 5.473130345  | -0.116183623 |
| C101 | 9.332789525   | 3.866295990  | -3.393271261 |
| C102 | 7.978598681   | 3.718369698  | -4.065071448 |
| C103 | 5.525713345   | 3.822922285  | -3.716570857 |
| C104 | 4.730299456   | 5.132012164  | -3.659670854 |
| C105 | 3.664639243   | 6.760684963  | -2.155168093 |
| C106 | 4.075648087   | 7.562100701  | -0.922923073 |
| C107 | 5.150091133   | 7.649578412  | 1.255950504  |
| C108 | 6.015592907   | 8.879909101  | 1.059939086  |
| C109 | 4.480983008   | 4.250665127  | -8.121251906 |
| C110 | 3.039824364   | 4.772554587  | -8.159676499 |
| C111 | 4.521803709   | 2.839917315  | -7.489522674 |
| C112 | 5.851264415   | 2.129302468  | -7.806227778 |
| C113 | 6.002742714   | 0.877643711  | -6.972918298 |
| C114 | 1.230368591   | 5.912499210  | -6.969229841 |
| C115 | 1.224485421   | 7.256575536  | -6.269170799 |
| C116 | 0.160255034   | 4.912282534  | -6.472035391 |
| C117 | 0.584829139   | 4.244401063  | -5.195425169 |
| C118 | 0.385047534   | 4.868608445  | -3.954068854 |
| C119 | 1.309169617   | 3.041086705  | -5.241675763 |
| C120 | 0.940012967   | 4.328124801  | -2.791711342 |
| C121 | 1.865430952   | 2.503821652  | -4.079181029 |
| C122 | 1.704054419   | 3.161052946  | -2.855540182 |
| C123 | 11.201078842  | -0.747453570 | 0.260005118  |
| C124 | 11.555549187  | -1.496796461 | 1.553888511  |
| C125 | 10.087790710  | -1.489774855 | -0.493086611 |
| C126 | 9.520498671   | -0.799000978 | -1.690000879 |
| C127 | 10.189883694  | -0.398204517 | -2.828623423 |
| C128 | 8.011202761   | -0.166240807 | -3.140485810 |
| C129 | 12.163281185  | -3.565268546 | 2.659905370  |
| C130 | 13.272991726  | -2.918616493 | 3.458363251  |
| C131 | 4.132832025   | -4.467852884 | -3.027963215 |
| C132 | 5.041982087   | -4.729765290 | -1.831484524 |
| C133 | 6.382232115   | -3.933848208 | -1.857718815 |
| C134 | 7.346417814   | -4.564697086 | -2.897431748 |
| C135 | 8.787330231   | -4.049819986 | -2.845846029 |
| C136 | 9.768543742   | -4.794263939 | -3.778300301 |
| C137 | 7.038303270   | -4.023380837 | -0.468790836 |
| C138 | 3.961687306   | 1.198605594  | 1.176880671  |

|       |              |               |              |
|-------|--------------|---------------|--------------|
| Fe139 | 5.651090876  | 1.491114842   | -0.050252376 |
| Fe140 | 2.032528352  | 1.158013293   | 1.240561598  |
| Fe141 | 3.816928629  | 1.450306291   | 3.151736488  |
| Fe142 | 4.096443307  | 3.158403610   | 1.174184549  |
| Fe143 | 2.218699718  | 3.589799481   | 2.979290742  |
| Fe144 | 5.180867159  | -0.291161914  | 1.778311832  |
| Fe145 | 3.729620095  | -0.049353444  | -0.383607614 |
| H146  | -0.522697677 | -5.496641662  | -8.047903380 |
| H147  | -0.517505179 | -3.880117836  | -8.261583235 |
| H148  | -4.768778840 | -4.378620382  | -8.743041396 |
| H149  | -2.541151894 | -3.946458275  | -9.535973503 |
| H150  | -2.520251115 | -5.704161571  | -9.428992052 |
| H151  | -5.021686168 | -3.500253132  | -6.092420061 |
| H152  | -4.892968592 | -6.862413140  | -7.180042056 |
| H153  | -6.336552175 | -4.169738048  | -7.081267226 |
| H154  | -5.042669066 | -8.835513271  | -5.964128060 |
| H155  | -2.841145611 | -6.721558616  | -5.434679564 |
| H156  | -6.097211063 | -8.015281906  | -4.792408713 |
| H157  | -2.745583907 | -3.608653811  | -1.357641010 |
| H158  | -3.041021482 | -4.868799045  | -3.904553955 |
| H159  | -0.943569668 | -6.742428401  | -4.071531296 |
| H160  | -6.879765671 | -5.512522889  | -0.068914153 |
| H161  | -5.484667388 | -5.681803290  | -2.580874891 |
| H162  | -1.615964746 | -8.072444218  | -3.102400438 |
| H163  | -4.022338942 | -3.306368584  | -2.553025989 |
| H164  | -4.744386661 | -8.153321358  | -1.342769129 |
| H165  | -7.147163354 | -6.725630767  | -1.352229181 |
| H166  | -0.260223776 | -4.710355692  | -0.204236834 |
| H167  | -0.338866811 | -2.944616917  | -0.411125337 |
| H168  | 0.639213337  | -3.645683657  | 0.898989795  |
| H169  | -2.430998643 | -3.810904619  | 0.674441041  |
| H170  | -4.419551581 | -10.228310830 | -0.344671930 |
| H171  | -5.049884987 | -2.498950598  | -2.176935726 |
| H172  | -5.383921842 | -6.898677852  | 3.177282183  |
| H173  | -7.538279122 | -4.801083654  | 4.926461865  |
| H174  | -0.772198878 | -2.200379351  | 2.687613433  |
| H175  | -2.540352469 | -2.228663630  | 2.548926906  |
| H176  | 3.237345203  | -1.732507136  | 9.883674451  |
| H177  | -6.728360743 | -2.048413311  | 2.512363286  |
| H178  | -8.130854833 | -3.344327488  | 4.094249653  |
| H179  | -5.486658421 | -1.806066603  | 3.762556869  |
| H180  | -6.949552391 | -3.194618813  | 5.417301954  |
| H181  | -6.435753359 | -4.530893351  | 2.691905204  |
| H182  | -4.426356153 | -3.800207254  | 4.885474946  |
| H183  | -4.083399256 | -4.672071053  | 2.122141102  |
| H184  | -1.571785862 | -1.529241703  | 1.242483333  |
| H185  | -1.237192700 | 2.805619652   | 3.249517341  |
| H186  | -2.715505421 | 1.852632651   | 3.557753767  |
| H187  | -2.042861333 | 2.049670340   | 5.587821734  |
| H188  | -2.579435018 | -0.266998952  | 6.868749923  |
| H189  | 0.297516607  | 1.713980106   | 6.311782359  |
| H190  | 2.593185513  | 0.865623235   | 6.698177468  |
| H191  | 0.970499166  | -2.862306514  | 8.147219945  |
| H192  | -2.261966716 | -6.302021853  | 0.934712110  |
| H193  | -0.095781202 | -8.563592231  | 0.377330781  |
| H194  | -0.735033564 | -9.242529343  | 1.886966084  |
| H195  | -2.366980284 | -8.092083727  | -0.323551211 |
| H196  | -5.272088879 | -9.670334449  | 1.119130231  |
| H197  | -1.325628487 | -2.036282749  | 7.693824634  |
| H198  | -0.498383224 | -4.816557333  | 2.790366068  |
| H199  | -6.629798390 | -8.142860857  | 5.334428926  |
| H200  | -5.597325511 | -8.970186335  | 4.141770073  |
| H201  | -3.587292081 | -8.094771069  | 5.787716381  |
| H202  | 9.459094413  | -7.687660861  | 6.462276230  |
| H203  | 3.999670801  | -1.129552022  | -6.235687741 |
| H204  | 4.994107828  | -2.732341676  | -2.933373793 |
| H205  | 5.860376386  | 1.838062805   | -8.866264180 |
| H206  | 6.696897647  | 2.807951731   | -7.624726314 |
| H207  | 3.689983510  | 2.228873937   | -7.873091630 |
| H208  | 2.192025007  | 7.809658211   | -6.334281333 |
| H209  | 4.739413338  | 4.135924876   | -9.184863170 |
| H210  | -0.013213671 | 0.212545814   | -4.647023397 |
| H211  | 0.488840996  | -2.577006382  | -5.822289964 |
| H212  | 3.176385623  | 5.443366120   | -6.199846761 |
| H213  | 0.967032019  | 6.166962159   | -8.016152031 |
| H214  | 5.296567926  | 5.327571382   | -6.543335726 |
| H215  | 3.393562192  | -2.198120176  | -4.974832893 |
| H216  | 4.368125134  | 2.925799167   | -6.402981386 |
| H217  | 6.365685674  | 4.965224882   | -7.739655119 |
| H218  | -1.446071742 | -0.256761972  | -7.958401197 |
| H219  | -0.819557047 | -1.167586478  | -3.935466386 |
| H220  | 7.077511165  | 1.925418407   | -5.706151357 |

|      |               |              |              |
|------|---------------|--------------|--------------|
| H221 | 1.233966890   | -2.151985661 | -4.289109209 |
| H222 | -5.583704696  | -0.535196217 | 0.029737691  |
| H223 | -3.371316789  | -0.861715997 | -1.395506662 |
| H224 | -7.896499546  | -2.304616681 | -3.717200046 |
| H225 | -5.488653763  | -0.868148291 | -4.761785233 |
| H226 | -8.086250125  | 1.126299993  | -1.794829426 |
| H227 | -12.563234589 | 2.726818980  | 0.547173337  |
| H228 | -10.127199665 | -0.281083947 | 0.287368496  |
| H229 | -10.745361736 | 1.156919421  | -2.006786085 |
| H230 | -9.284849596  | 2.679066570  | 0.239622205  |
| H231 | -13.159197169 | 5.614296896  | -2.492293058 |
| H232 | -5.134155562  | 1.880104588  | 0.432298888  |
| H233 | -5.670758706  | 2.286055230  | -1.204995957 |
| H234 | -13.963311189 | 4.707712477  | -0.243842485 |
| H235 | -9.687880302  | 2.529445670  | -2.328644389 |
| H236 | -5.990220744  | 0.308731396  | -2.750107216 |
| H237 | -6.262454009  | -2.970904729 | -3.692755113 |
| H238 | -7.690376489  | 1.450729136  | -6.253344795 |
| H239 | -0.902897428  | 2.452857157  | -2.149560266 |
| H240 | -7.042972335  | 0.217026131  | -7.351223026 |
| H241 | 4.112208287   | 0.440167184  | 10.340255002 |
| H242 | 3.093168121   | 0.676427140  | 9.081906431  |
| H243 | -1.355215948  | 5.208904035  | 3.323569624  |
| H244 | -3.493830516  | 3.609032768  | 2.246147763  |
| H245 | -3.205281810  | 5.338901017  | 5.336444732  |
| H246 | -3.215519659  | 3.349372912  | -1.362802428 |
| H247 | -4.329412291  | 4.793216192  | -2.866096952 |
| H248 | -4.233112628  | 5.308931039  | -5.039554050 |
| H249 | -5.273710251  | 4.999901866  | -1.610661363 |
| H250 | -2.408409243  | 3.730047784  | -5.153088924 |
| H251 | -3.696790649  | 3.612372213  | -6.394947197 |
| H252 | -5.275665889  | 9.316385036  | 4.885990678  |
| H253 | -6.875738516  | 10.079401696 | 4.817060279  |
| H254 | -4.422890594  | 9.425434196  | 2.823125814  |
| H255 | -5.344130028  | 9.051017213  | 1.369892064  |
| H256 | -4.452447590  | 10.702358697 | -1.040946443 |
| H257 | -1.545313985  | 7.554940510  | -2.291947697 |
| H258 | -9.391231843  | 6.287104518  | -1.178435000 |
| H259 | -7.694211096  | 4.321973388  | 3.061800743  |
| H260 | -5.851906856  | 7.465239544  | -0.898537254 |
| H261 | -0.165707629  | 6.557993451  | 1.542653351  |
| H262 | -0.603301575  | 7.335543036  | 3.706801624  |
| H263 | -1.832350875  | 5.825708095  | -0.248307529 |
| H264 | -4.886635243  | 0.874271624  | -6.802551303 |
| H265 | -0.818480610  | 9.956427936  | 5.648723215  |
| H266 | -2.122258839  | 1.552133170  | -6.193395023 |
| H267 | -0.351087171  | 8.229124527  | 1.009579000  |
| H268 | -6.159789080  | 4.631093487  | 1.161180511  |
| H269 | -2.029025641  | 8.856480737  | 6.336460975  |
| H270 | -2.884505007  | 10.194435048 | -1.575322550 |
| H271 | -6.193358601  | 9.122461887  | -1.244248079 |
| H272 | -0.001522562  | 0.043609558  | -7.168173601 |
| H273 | -1.743439024  | -1.760859280 | -6.226330201 |
| H274 | -10.907023559 | 6.089437742  | 0.775569815  |
| H275 | -3.553702105  | 2.017845510  | -3.775315459 |
| H276 | -2.708748517  | 8.261011325  | 1.801907975  |
| H277 | -1.584891229  | 8.764664231  | -1.001821807 |
| H278 | -0.274469455  | 6.445803868  | -0.760777838 |
| H279 | -3.752656559  | 6.703350333  | -1.421913990 |
| H280 | -5.571390480  | 3.961200609  | 6.339202809  |
| H281 | -5.539282015  | 6.621409097  | 4.559420180  |
| H282 | -6.921070802  | 8.344524731  | 6.448915295  |
| H283 | -4.397477089  | 4.932050398  | 7.257403876  |
| H284 | -8.168064836  | 6.025348864  | 4.365501012  |
| H285 | 9.281530554   | 4.635452995  | -2.608299614 |
| H286 | 9.516762180   | 2.897923264  | -2.883082430 |
| H287 | 10.821188416  | 0.230762517  | 0.590571259  |
| H288 | 11.278759845  | 4.070295177  | -3.964851941 |
| H289 | 10.281653044  | 3.590978272  | -5.172581793 |
| H290 | 1.768823757   | 4.111868200  | 5.812955377  |
| H291 | -0.189820505  | 4.770367283  | 8.047333744  |
| H292 | 0.783093181   | 8.262005211  | 5.754378092  |
| H293 | -0.014895462  | 4.065856200  | 5.645184868  |
| H294 | 0.725191812   | 5.985851492  | 8.648341974  |
| H295 | 5.704460960   | 6.951656517  | 1.901663795  |
| H296 | 1.688758337   | 6.449987906  | 6.544341976  |
| H297 | 4.974069286   | -8.425412331 | 2.672457524  |
| H298 | 7.804524114   | -7.276251013 | 2.389417087  |
| H299 | 5.159686968   | 5.988012999  | -0.079856646 |
| H300 | 2.022196505   | -2.464816652 | 5.160630828  |
| H301 | 3.768709226   | 7.414316927  | -3.030485670 |
| H302 | 2.421562641   | 1.563152220  | -4.115206605 |

|       |               |               |              |
|-------|---------------|---------------|--------------|
| H303  | 2.588559392   | 6.543683467   | -2.042561240 |
| H304  | 3.157049071   | -6.346210479  | 2.853519129  |
| H305  | 4.570940725   | 4.862581081   | -1.648016300 |
| H306  | 4.080722895   | -5.558413439  | 1.570361091  |
| H307  | 5.596270445   | -7.423162893  | 1.340778939  |
| H308  | 6.117426306   | -5.596194082  | 3.069014653  |
| H309  | 5.200929966   | -6.532302075  | 4.262669715  |
| H310  | 0.007210033   | 4.168952832   | -7.266980960 |
| H311  | 6.764732469   | -10.032187571 | 1.870155339  |
| H312  | 8.112820514   | -10.269476531 | -0.846024142 |
| H313  | 2.127323254   | 2.732314177   | -1.947484418 |
| H314  | 7.887344688   | -12.248306725 | 1.286461192  |
| H315  | 7.108621786   | -12.172504385 | -0.151688108 |
| H316  | 4.598492994   | -3.734894919  | 3.171472520  |
| H317  | 0.787882257   | 4.802181656   | -1.819427691 |
| H318  | 1.442424453   | 2.522055984   | -6.193736558 |
| H319  | 11.361385366  | -5.518376893  | -0.253905163 |
| H320  | 10.475824981  | -2.467951105  | -0.827726080 |
| H321  | 8.963383691   | -5.444284420  | 0.645470840  |
| H322  | 11.648780586  | -5.125141238  | -1.729118089 |
| H323  | 6.590921735   | 8.903322120   | 0.103792650  |
| H324  | 7.144605837   | -3.214337749  | 1.982124314  |
| H325  | 5.230574310   | -5.806416489  | -1.746882502 |
| H326  | 7.053480493   | 4.208833392   | -2.302350090 |
| H327  | 7.349585101   | -5.650377315  | -2.711663726 |
| H328  | 9.371532927   | 0.300905746   | -4.680660607 |
| H329  | 7.077498868   | 0.038266332   | -3.645983198 |
| H330  | 9.439123549   | -10.970649712 | 0.084685860  |
| H331  | 3.591690843   | -2.129802951  | 4.479689781  |
| H332  | 8.445474538   | -4.506192570  | 3.501881365  |
| H333  | 7.024266819   | -2.457453936  | 3.330293984  |
| H334  | 8.474333302   | -6.673841253  | 4.375111255  |
| H335  | 1.502530048   | -5.605015852  | 3.661957216  |
| H336  | 8.806519533   | -2.987470120  | -3.133701221 |
| H337  | 9.176722332   | -4.112675697  | -1.820426630 |
| H338  | 6.922094644   | -4.410807545  | -3.901942532 |
| H339  | 5.052874798   | 3.053474004   | -3.086111753 |
| H340  | -0.187026046  | 5.797569278   | -3.910989700 |
| H341  | -0.777118754  | 5.474500971   | -6.345649101 |
| H342  | 4.462216143   | -4.419420511  | -0.946286711 |
| H343  | 9.476311978   | -5.388020792  | 2.735227321  |
| H344  | 9.686998314   | -6.766220981  | 1.006526377  |
| H345  | 0.973863862   | -4.479541859  | 4.850562368  |
| H346  | 11.246309165  | -0.395079278  | -3.067633592 |
| H347  | 9.271977701   | -1.711501790  | 0.206357216  |
| H348  | 5.538238699   | 3.482316131   | -4.753607668 |
| H349  | 4.231195227   | 7.942420499   | 1.787361003  |
| H350  | 3.403453516   | -2.639195615  | 7.602936059  |
| H351  | 4.046575713   | -1.096603474  | 6.993277934  |
| H352  | 13.083292022  | 0.003000556   | -0.053114602 |
| H353  | 12.808335103  | -1.392684456  | -0.860171296 |
| H354  | 12.520832874  | -4.560933297  | 2.355233655  |
| H355  | 11.831220439  | -3.329450985  | 0.565454496  |
| H356  | 13.979864313  | -2.297083322  | 2.857636068  |
| H357  | 11.278022041  | -3.711820289  | 3.298786478  |
| H358  | 6.070414287   | -1.184484889  | 8.785193359  |
| H359  | -10.864964502 | 6.315827747   | 6.241478889  |
| H360  | 7.956229061   | -8.641022252  | 6.594421617  |
| H361  | 6.804299480   | -6.149849674  | 6.740243000  |
| H362  | -10.467781374 | 7.367851554   | 3.435273860  |
| H363  | -10.042825685 | 4.359494690   | 3.956045915  |
| H364  | -11.361731313 | 5.063771403   | 2.998595301  |
| H365  | 0.899380693   | -0.861662128  | 2.505125267  |
| H366  | -7.302002526  | 5.823776454   | -1.992850195 |
| H367  | 2.463970451   | -1.270561152  | 2.156343355  |
| H368  | 1.325720547   | -1.331432537  | 0.949472360  |
| Mo369 | 6.220367521   | -1.095535768  | -0.615263574 |
| N370  | 1.623607016   | -0.815360074  | 1.783714920  |
| N371  | -0.860057705  | 1.256109578   | 1.048468732  |
| N372  | -1.849743032  | 0.896450226   | 1.410641006  |
| N373  | -0.798065060  | -4.759850011  | -8.702432558 |
| N374  | -4.431079466  | -4.588819639  | -7.807289684 |
| N375  | -5.148841240  | -6.772531082  | -6.200038123 |
| N376  | -2.884591087  | -7.300316299  | -4.592151881 |
| N377  | -2.926790374  | -5.031255338  | -2.906544714 |
| N378  | -5.402607286  | -5.615535610  | -1.562729910 |
| N379  | -4.942413769  | -8.212097193  | -0.338834813 |
| N380  | -2.186271756  | -8.602825278  | 0.544870582  |
| N381  | -1.538225003  | -6.143894441  | 1.632275539  |
| N382  | -3.803441287  | -4.689509699  | 3.107283165  |
| N383  | -5.301575947  | -6.921395285  | 4.197249252  |
| N384  | 7.438113784   | -11.605357808 | 0.630953758  |

|      |               |              |              |
|------|---------------|--------------|--------------|
| N385 | 7.407645081   | -9.233330126 | 1.880462241  |
| N386 | 3.814482169   | -4.386247015 | 3.277101505  |
| N387 | 1.742362832   | -4.825123655 | 4.282491730  |
| N388 | 2.838594422   | -2.811907087 | 4.666115247  |
| N389 | 8.078013513   | -7.505578059 | 4.867226713  |
| N390 | -1.033766702  | 0.089322009  | -7.089247942 |
| N391 | 3.206558427   | -1.515037099 | -5.715822949 |
| N392 | -2.883638381  | 1.202214153  | -5.590590225 |
| N393 | -5.617416259  | 1.117606864  | -6.137765173 |
| N394 | -6.484789153  | -1.095843241 | -4.631034909 |
| N395 | -6.221112197  | -0.284620844 | -1.949616601 |
| N396 | -2.938002744  | 2.360940032  | -1.404108540 |
| N397 | -1.802691946  | 0.513583582  | -1.917479440 |
| N398 | -8.293778312  | 1.128778077  | -0.799056333 |
| N399 | -11.676120931 | 4.055478488  | -2.375352664 |
| N400 | -13.182041253 | 4.322953589  | -0.768149823 |
| N401 | 3.979447124   | 0.236874143  | 9.346240540  |
| N402 | 0.714293258   | 5.242586362  | 7.944672979  |
| N403 | -0.186742980  | 7.980294328  | 5.871352668  |
| N404 | -1.416710342  | 7.876209675  | 3.386679660  |
| N405 | -3.355483900  | 7.651949734  | -1.253244531 |
| N406 | -3.782704362  | 9.950963113  | -1.171492454 |
| N407 | -5.518595961  | 8.433201316  | -0.922398368 |
| N408 | -2.346533727  | 5.178381057  | 3.027684694  |
| N409 | -4.142415151  | 4.955636627  | 5.181298124  |
| N410 | -6.186449630  | 6.791411242  | 5.329563793  |
| N411 | -5.330654943  | 9.329147464  | 2.350318380  |
| N412 | -8.885128698  | 6.690729282  | 4.645141807  |
| N413 | 10.356729593  | 4.232289912  | -4.376615581 |
| N414 | 6.908999976   | 4.013037152  | -3.297152353 |
| N415 | 4.400814071   | 5.536144285  | -2.414529857 |
| N416 | 4.859767111   | 6.965418264  | 0.008506103  |
| N417 | 5.399808036   | 5.249738376  | -7.562485953 |
| N418 | 2.583097660   | 5.388388388  | -7.034194464 |
| N419 | 12.376282421  | -0.503009741 | -0.593238642 |
| N420 | 8.1530111613  | -0.632959114 | -1.899736690 |
| N421 | 9.220555204   | -0.002472004 | -3.722770929 |
| N422 | 11.863881866  | -2.817892034 | 1.451821227  |
| O423 | -2.613335661  | -4.886533274 | -6.472400119 |
| O424 | -5.752528516  | -5.346045903 | -4.526512843 |
| O425 | -4.200366558  | -8.556421219 | -3.209976189 |
| O426 | -2.063213154  | -6.362049192 | -1.272616420 |
| O427 | -4.506012724  | -4.506614467 | 0.206568877  |
| O428 | -6.184377240  | -7.410951432 | 1.407870641  |
| O429 | -3.036717855  | -9.938177705 | 2.206406575  |
| O430 | 0.382543994   | -6.986806655 | 2.581291481  |
| O431 | -2.083535744  | -4.657968793 | 4.612301684  |
| O432 | -5.148529141  | -5.795913669 | 6.163128299  |
| O433 | -4.870395281  | -9.205478017 | 6.920673827  |
| O434 | 9.365383427   | -8.521357688 | 0.873312306  |
| O435 | 6.822522270   | -9.424548352 | 4.689573699  |
| O436 | 8.194405582   | -6.261242159 | 8.227553204  |
| O437 | -3.549239115  | -0.792404765 | -4.654919931 |
| O438 | 1.770673988   | -0.180305610 | -6.863703543 |
| O439 | -6.056426755  | 1.982393507  | -4.072018874 |
| O440 | -4.294897000  | 4.452375412  | -4.581172343 |
| O441 | -8.657688354  | -0.679947307 | -5.254926387 |
| O442 | -6.963652890  | -2.314625517 | -1.208107469 |
| O443 | -7.550927136  | 0.571363884  | 1.282411888  |
| O444 | -10.976488357 | 1.116907764  | 1.509468891  |
| O445 | 5.532401774   | -2.876427544 | 9.795413409  |
| O446 | -1.902236297  | 0.416235509  | 6.708962069  |
| O447 | -1.613609035  | 6.299129428  | 6.455661581  |
| O448 | -2.902343439  | 9.534272570  | 3.962789815  |
| O449 | -4.014727304  | 6.124271750  | 1.781665914  |
| O450 | -5.312876124  | 3.379513376  | 3.989055704  |
| O451 | -1.997867829  | 2.938616109  | 5.183745184  |
| O452 | -6.643550199  | 6.231207650  | 7.506106722  |
| O453 | -9.223789436  | 8.843982964  | 5.310949833  |
| O454 | -7.471502265  | 8.555029271  | 2.533159285  |
| O455 | -12.455411653 | 6.718610222  | 5.022778513  |
| O456 | -6.788915054  | 5.654830386  | -1.178958950 |
| O457 | 7.893714971   | 3.308525841  | -5.249148131 |
| O458 | 4.439086583   | 5.769365832  | -4.694607841 |
| O459 | 3.648344881   | 8.721358112  | -0.782540391 |
| O460 | 6.119697176   | 9.767838209  | 1.890743199  |
| O461 | 2.327436896   | 4.621449426  | -9.166975368 |
| O462 | 5.495951144   | -0.199881199 | -7.268564640 |
| O463 | 6.704369304   | 0.999218423  | -5.827535943 |
| O464 | 0.247760919   | 7.751821491  | -5.724341118 |
| O465 | 11.600129775  | -0.913898761 | 2.655289204  |
| O466 | 13.453007317  | -3.112568719 | 4.652599123  |

|                                                                                     |                                        |              |               |              |
|-------------------------------------------------------------------------------------|----------------------------------------|--------------|---------------|--------------|
|                                                                                     | O467                                   | 4.167985806  | -3.216971449  | -3.490043193 |
|                                                                                     | O468                                   | 3.383300025  | -5.326772455  | -3.493811790 |
|                                                                                     | O469                                   | 10.946524073 | -5.017164616  | -3.323139450 |
|                                                                                     | O470                                   | 9.362369901  | -5.100741371  | -4.934308910 |
|                                                                                     | O471                                   | 7.246337893  | -2.894542994  | 0.150923914  |
|                                                                                     | O472                                   | 7.356604441  | -5.134788403  | 0.001555065  |
|                                                                                     | O473                                   | 6.090274060  | -2.568712492  | -2.171558568 |
|                                                                                     | O474                                   | 9.147396616  | -5.185464381  | 3.654817258  |
|                                                                                     | O475                                   | 7.019124954  | -3.359497704  | 2.956956308  |
|                                                                                     | O476                                   | -4.337209182 | 5.039438567   | -1.905134830 |
|                                                                                     | O477                                   | 12.102777725 | -5.249956212  | -0.841807005 |
|                                                                                     | O478                                   | 9.811957642  | -5.783304269  | 1.037699744  |
|                                                                                     | S479                                   | 1.002849314  | 5.337544982   | 3.841300398  |
|                                                                                     | S480                                   | 1.896839679  | 3.478117963   | 0.693520149  |
|                                                                                     | S481                                   | 5.111018733  | 0.501113552   | -2.013946736 |
|                                                                                     | S482                                   | 1.600444707  | 1.499471725   | 3.515641631  |
|                                                                                     | S483                                   | 1.714338030  | 0.429714822   | -0.926634396 |
|                                                                                     | S484                                   | 5.866177966  | 3.705673182   | -0.072458642 |
|                                                                                     | S485                                   | 4.321648954  | -1.998762620  | 0.560366490  |
|                                                                                     | S486                                   | 4.477075375  | 3.562077772   | 3.388850491  |
|                                                                                     | S487                                   | 7.210353263  | 0.294203144   | 1.045501431  |
|                                                                                     | S488                                   | 4.971429282  | -0.258901708  | 3.975101719  |
|                                                                                     | end                                    |              |               |              |
| <b>Fe2-NH3</b><br><b>2N2 TS</b><br><b>35, S=1</b>                                   |                                        |              |               |              |
| <b>Fe( 139) -2.335</b>                                                              |                                        |              |               |              |
| <b>Fe( 140) -0.091</b>                                                              |                                        |              |               |              |
| <b>Fe( 141) -2.611</b>                                                              |                                        |              |               |              |
| <b>Fe( 142) 2.842</b>                                                               |                                        |              |               |              |
| <b>Fe( 143) 3.207</b>                                                               |                                        |              |               |              |
| <b>Fe( 144) 2.424</b>                                                               |                                        |              |               |              |
| <b>Fe( 145) -2.073</b>                                                              |                                        |              |               |              |
| 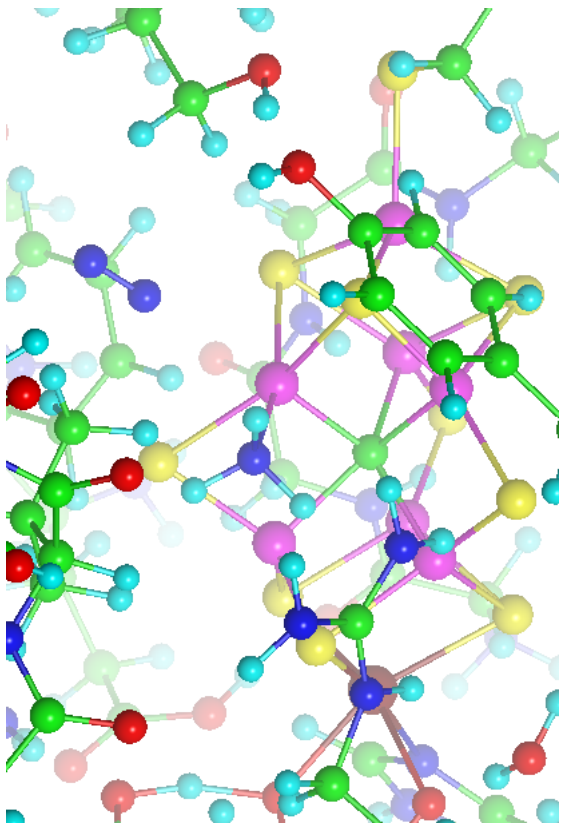 |                                        |              |               |              |
|                                                                                     | <b>bmexpprot2nh32n2xdte_1_53250.34</b> |              |               |              |
|                                                                                     | C1                                     | -3.092216493 | -4.736460931  | -7.620228605 |
|                                                                                     | C2                                     | -2.254594785 | -4.776488878  | -8.903618141 |
|                                                                                     | C3                                     | -5.328373183 | -4.357221469  | -6.675033576 |
|                                                                                     | C4                                     | -5.422946840 | -5.526222812  | -5.700318996 |
|                                                                                     | C5                                     | -5.150492839 | -7.926876857  | -5.326397923 |
|                                                                                     | C6                                     | -4.034136090 | -7.934129847  | -4.275303240 |
|                                                                                     | C7                                     | -1.847807963 | -7.100569082  | -3.582332342 |
|                                                                                     | C8                                     | -2.273598290 | -6.126156143  | -2.478037059 |
|                                                                                     | C9                                     | -3.506297309 | -4.068305911  | -1.971387264 |
|                                                                                     | C10                                    | -4.511735863 | -4.722716174  | -1.013701315 |
|                                                                                     | C11                                    | -6.380198032 | -6.227793578  | -0.710640556 |
|                                                                                     | C12                                    | -5.809037537 | -7.299759059  | 0.228603283  |
|                                                                                     | C13                                    | -4.508253380 | -9.373120015  | 0.393319153  |
|                                                                                     | C14                                    | -3.177497754 | -9.295862748  | 1.155579470  |
|                                                                                     | C15                                    | -0.863130669 | -8.450362825  | 1.156090263  |
|                                                                                     | C16                                    | -0.618389772 | -7.117495833  | 1.866455757  |
|                                                                                     | C17                                    | -1.470105621 | -4.842243843  | 2.274286008  |
|                                                                                     | C18                                    | -2.481765875 | -4.723791989  | 3.431312583  |
|                                                                                     | C19                                    | -1.521703691 | -3.695369802  | 1.244813948  |
|                                                                                     | C20                                    | -1.619703023 | -2.334659089  | 1.934393780  |
|                                                                                     | C21                                    | -0.309757418 | -3.764933702  | 0.307839359  |
|                                                                                     | C22                                    | -4.821296544 | -4.487325920  | 4.134819962  |
|                                                                                     | C23                                    | -5.094976719 | -5.780226768  | 4.925297661  |
|                                                                                     | C24                                    | -6.102496341 | -3.868687075  | 3.523035261  |
|                                                                                     | C25                                    | -7.238967352 | -3.807169273  | 4.551630798  |
|                                                                                     | C26                                    | -5.809173466 | -2.468622253  | 2.966227843  |
|                                                                                     | C27                                    | -5.628291422 | -8.145926645  | 4.894698755  |
|                                                                                     | C28                                    | -4.617903161 | -8.492794064  | 5.969658438  |
|                                                                                     | C29                                    | 8.402514638  | -10.610022988 | 0.179857698  |
|                                                                                     | C30                                    | 8.437417655  | -9.350023550  | 1.036157249  |
|                                                                                     | C31                                    | 7.104196220  | -8.070941489  | 2.704463568  |
|                                                                                     | C32                                    | 7.317173857  | -8.398599356  | 4.194052529  |
|                                                                                     | C33                                    | 5.662151116  | -7.612652291  | 2.429195004  |
|                                                                                     | C34                                    | 5.300055754  | -6.333224628  | 3.178658081  |
|                                                                                     | C35                                    | 4.010928230  | -5.703836720  | 2.652645222  |
|                                                                                     | C36                                    | 2.797282266  | -4.022301101  | 4.065122571  |
|                                                                                     | C37                                    | 8.377874468  | -7.668047019  | 6.278000294  |
|                                                                                     | C38                                    | 7.738412538  | -6.611740457  | 7.150594233  |
|                                                                                     | C39                                    | -1.477053462 | -0.727872284  | -5.940118136 |
|                                                                                     | C40                                    | -2.743253067 | -0.119022106  | -5.310292369 |
|                                                                                     | C41                                    | -0.376756899 | -0.812126057  | -4.861301953 |
|                                                                                     | C42                                    | 0.823185260  | -1.717086309  | -5.209301751 |
|                                                                                     | C43                                    | 1.960080489  | -1.060183174  | -5.992909568 |
|                                                                                     | C44                                    | -3.777782863 | 2.092491129   | -4.852960798 |
|                                                                                     | C45                                    | -5.260837894 | 1.728086253   | -4.988884170 |
|                                                                                     | C46                                    | -3.495057100 | 3.525691341   | -5.326025662 |
|                                                                                     | C47                                    | -6.970955252 | 0.612648961   | -6.339373681 |
|                                                                                     | C48                                    | -7.442339908 | -0.459036091  | -5.349192826 |
|                                                                                     | C49                                    | -6.832159328 | -2.037565003  | -3.577504290 |
|                                                                                     | C50                                    | -6.660907397 | -1.551130636  | -2.135958608 |
|                                                                                     | C51                                    | -6.029244901 | 0.251448099   | -0.597938981 |
|                                                                                     | C52                                    | -7.366289828 | 0.629715273   | 0.056500253  |
|                                                                                     | C53                                    | -5.170741615 | 1.525958100   | -0.602903390 |
|                                                                                     | C54                                    | -3.777153788 | 1.318565347   | -1.087517801 |
|                                                                                     | C55                                    | -3.026713475 | 0.191664936   | -1.355976149 |
|                                                                                     | C56                                    | -1.736484150 | 1.852778565   | -1.790023137 |
|                                                                                     | C57                                    | -9.505946354 | 1.756630128   | -0.344943248 |

|       |               |              |              |
|-------|---------------|--------------|--------------|
| C58   | -10.251401083 | 0.782774870  | 0.566567637  |
| C59   | -10.354845349 | 2.091233893  | -1.593749734 |
| C60   | -11.459673979 | 3.090493301  | -1.415083588 |
| C61   | -12.383980473 | 3.250376817  | -0.400973404 |
| C62   | -12.709532698 | 4.762477306  | -1.987825681 |
| C63   | 3.882159404   | -1.214341156 | 9.144003963  |
| C64   | 5.270993857   | -1.815975005 | 9.251671662  |
| C65   | 3.355752194   | -1.549735923 | 7.723926060  |
| C66   | 1.948931941   | -1.056240537 | 7.480777080  |
| C67   | 0.827484691   | -1.860712492 | 7.751530919  |
| C68   | 1.724104247   | 0.235204208  | 6.971648832  |
| C69   | -0.473401076  | -1.402315330 | 7.507143994  |
| C70   | 0.434778281   | 0.713294821  | 6.742908430  |
| C71   | -0.664459462  | -0.111304475 | 7.000096455  |
| C72   | 0.783671665   | 5.824554552  | 6.595764180  |
| C73   | -0.447591933  | 6.704065875  | 6.314735614  |
| C74   | 0.881289937   | 4.714733651  | 5.553612710  |
| C75   | -1.234626033  | 8.934311964  | 5.591332606  |
| C76   | -1.931456092  | 8.784835514  | 4.235314018  |
| C77   | -2.029871236  | 7.451691902  | 2.135432438  |
| C78   | -2.904054752  | 6.184181648  | 2.302764779  |
| C79   | -0.885599837  | 7.251087274  | 1.115918925  |
| C80   | -1.226953966  | 6.737156345  | -0.287189647 |
| C81   | -1.887900769  | 7.740737191  | -1.246784114 |
| C82   | -4.203382077  | 8.664564543  | -1.145978415 |
| C83   | -3.124394010  | 3.913383693  | 3.183805009  |
| C84   | -4.314088628  | 4.052128494  | 4.143168933  |
| C85   | -2.244708756  | 2.758702492  | 3.695659447  |
| C86   | -4.990428733  | 4.898699460  | 6.336363334  |
| C87   | -5.992757057  | 6.036895995  | 6.445145750  |
| C88   | -6.937903825  | 8.023223241  | 5.388135268  |
| C89   | -8.449784504  | 7.888302730  | 5.089760846  |
| C90   | -6.317584722  | 9.157398427  | 4.563904576  |
| C91   | -6.425828785  | 8.956402199  | 3.055799056  |
| C92   | -10.226029731 | 6.523410777  | 4.095020178  |
| C93   | -11.265132236 | 6.525446318  | 5.204398267  |
| C94   | -10.305252257 | 5.196754293  | 3.288061919  |
| C95   | -9.404345498  | 5.221743520  | 2.074592778  |
| C96   | -9.860553069  | 5.759597375  | 0.861998218  |
| C97   | -8.072452059  | 4.779401209  | 2.143058321  |
| C98   | -9.012140514  | 5.876473217  | -0.241497478 |
| C99   | -7.199395724  | 4.914895792  | 1.059153963  |
| C100  | -7.681036863  | 5.472197307  | -0.122951804 |
| C101  | 9.340795433   | 3.867242653  | -3.394525660 |
| C102  | 7.986922884   | 3.717631899  | -4.070248818 |
| C103  | 5.532111232   | 3.832560755  | -3.728261833 |
| C104  | 4.734379073   | 5.138315669  | -3.669516391 |
| C105  | 3.677668541   | 6.767216905  | -2.160946229 |
| C106  | 4.091255437   | 7.566843478  | -0.927665087 |
| C107  | 5.138045826   | 7.649560843  | 1.265046726  |
| C108  | 6.025176989   | 8.863141664  | 1.070472430  |
| C109  | 4.470755383   | 4.254840815  | -8.125965508 |
| C110  | 3.026231892   | 4.769069953  | -8.160428349 |
| C111  | 4.515901910   | 2.843369992  | -7.494916323 |
| C112  | 5.851433889   | 2.139899663  | -7.805037384 |
| C113  | 6.000170715   | 0.883028765  | -6.978334683 |
| C114  | 1.210508373   | 5.898423550  | -6.973165608 |
| C115  | 1.194841791   | 7.252807861  | -6.296139109 |
| C116  | 0.150403933   | 4.897789298  | -6.456365329 |
| C117  | 0.585681913   | 4.236455696  | -5.178447528 |
| C118  | 0.398392055   | 4.864790539  | -3.936804752 |
| C119  | 1.295119167   | 3.023849772  | -5.225488113 |
| C120  | 0.948271276   | 4.314062353  | -2.776726040 |
| C121  | 1.847092780   | 2.478376275  | -4.064694742 |
| C122  | 1.692877438   | 3.133888896  | -2.840469727 |
| C123  | 11.189376228  | -0.743308614 | 0.266776513  |
| C124  | 11.549656279  | -1.496702039 | 1.557364387  |
| C125  | 10.089023111  | -1.495055690 | -0.498257962 |
| C126  | 9.511876924   | -0.798112057 | -1.687867776 |
| C127  | 10.176557705  | -0.388961928 | -2.826592863 |
| C128  | 7.995326194   | -0.166742839 | -3.132194538 |
| C129  | 12.171082687  | -3.564123148 | 2.656071022  |
| C130  | 13.283280685  | -2.919807995 | 3.454593542  |
| C131  | 4.142160492   | -4.482728340 | -3.042955266 |
| C132  | 5.046349711   | -4.736438717 | -1.840655356 |
| C133  | 6.380698038   | -3.932677268 | -1.864695184 |
| C134  | 7.345811549   | -4.556123372 | -2.908134598 |
| C135  | 8.784917709   | -4.036416908 | -2.863519804 |
| C136  | 9.766068114   | -4.786656235 | -3.792401174 |
| C137  | 7.039800016   | -4.026081759 | -0.477946625 |
| C138  | 3.967471997   | 1.195534906  | 1.170665827  |
| Fe139 | 5.638012527   | 1.481274784  | -0.028643473 |



|       |               |               |              |
|-------|---------------|---------------|--------------|
| Fe140 | 2.009585416   | 1.165394593   | 1.275065784  |
| Fe141 | 3.835712393   | 1.489611271   | 3.140793336  |
| Fe142 | 4.078022914   | 3.174756464   | 1.137690568  |
| Fe143 | 2.231412455   | 3.643270811   | 2.938227630  |
| Fe144 | 5.176654468   | -0.296353181  | 1.795248390  |
| Fe145 | 3.694403618   | -0.067193927  | -0.345194416 |
| H146  | -0.532602936  | -5.485903817  | -8.074166121 |
| H147  | -0.524307053  | -3.872434131  | -8.306647590 |
| H148  | -4.780073947  | -4.365291203  | -8.738622271 |
| H149  | -2.560571347  | -3.934567097  | -9.545891790 |
| H150  | -2.545274722  | -5.692049666  | -9.445955318 |
| H151  | -5.008538798  | -3.485498618  | -6.084817085 |
| H152  | -4.906382718  | -6.852563707  | -7.173318094 |
| H153  | -6.333790960  | -4.151342634  | -7.066500996 |
| H154  | -5.050221572  | -8.822953698  | -5.952642840 |
| H155  | -2.843995800  | -6.714324005  | -5.437470199 |
| H156  | -6.096752472  | -8.000796139  | -4.774295434 |
| H157  | -2.731203792  | -3.588361190  | -1.361812663 |
| H158  | -3.029117951  | -4.854941075  | -3.905123624 |
| H159  | -0.941613842  | -6.725859967  | -4.076797587 |
| H160  | -6.871611243  | -5.477683241  | -0.076693595 |
| H161  | -5.4666676066 | -5.665744166  | -2.582871318 |
| H162  | -1.609771464  | -8.058535092  | -3.105451392 |
| H163  | -4.003180541  | -3.285333622  | -2.559073204 |
| H164  | -4.730430867  | -8.121091068  | -1.328692178 |
| H165  | -7.137307012  | -6.695635927  | -1.353825232 |
| H166  | -0.266249507  | -4.727000335  | -0.221260660 |
| H167  | -0.354238629  | -2.964139824  | -0.447828476 |
| H168  | 0.633925901   | -3.643108302  | 0.866721496  |
| H169  | -2.439653575  | -3.831059372  | 0.654099603  |
| H170  | -4.426198763  | -10.201198706 | -0.327184673 |
| H171  | -5.031086366  | -2.485034714  | 2.191429548  |
| H172  | -5.380294274  | -6.891442556  | 3.185947074  |
| H173  | -7.532312773  | -4.803611494  | 4.913200336  |
| H174  | -0.768301659  | -2.164613769  | 2.610906269  |
| H175  | -2.537149687  | -2.232732039  | 2.528672721  |
| H176  | 3.237316737   | -1.729585201  | 9.880010623  |
| H177  | -6.713009897  | -2.035555938  | 2.513877452  |
| H178  | -8.124345973  | -3.338448075  | 4.095513059  |
| H179  | -5.479610924  | -1.796157434  | 3.776231424  |
| H180  | -6.943788339  | -3.202135612  | 5.423028283  |
| H181  | -6.425214407  | -4.517997156  | 2.688741562  |
| H182  | -4.412744418  | -3.791930423  | 4.884176169  |
| H183  | -4.081847630  | -4.663654857  | 2.120489856  |
| H184  | -1.624343108  | -1.539060200  | 1.178724527  |
| H185  | -1.298567046  | 2.760401975   | 3.134750106  |
| H186  | -2.782028034  | 1.826732985   | 3.478448234  |
| H187  | -2.016766324  | 1.978893811   | 5.488910847  |
| H188  | -2.593016845  | -0.284642986  | 6.870990289  |
| H189  | 0.276993510   | 1.707856570   | 6.324764626  |
| H190  | 2.575924860   | 0.866760478   | 6.710534383  |
| H191  | 0.968913368   | -2.871221427  | 8.144366976  |
| H192  | -2.247657848  | -6.311067413  | 0.928427075  |
| H193  | -0.080403702  | -8.569237927  | 0.393379314  |
| H194  | -0.729472558  | -9.243870342  | 1.901310919  |
| H195  | -2.344100497  | -8.099659448  | -0.326737517 |
| H196  | -5.272911161  | -9.632335731  | 1.135219415  |
| H197  | -1.330758943  | -2.053474037  | 7.695834369  |
| H198  | -0.495551335  | -4.806340617  | 2.776186747  |
| H199  | -6.632365038  | -8.120753264  | 5.348769612  |
| H200  | -5.610964881  | -8.959772148  | 4.152635418  |
| H201  | -3.590891700  | -8.094268206  | 5.800740226  |
| H202  | 9.463475617   | -7.684306669  | 6.462054397  |
| H203  | 3.988042786   | -1.134967634  | -6.253722250 |
| H204  | 4.988899181   | -2.739619912  | -2.946501968 |
| H205  | 5.871521825   | 1.855977448   | -8.866993513 |
| H206  | 6.693089830   | 2.819498703   | -7.610962212 |
| H207  | 3.688981407   | 2.227880931   | -7.882038568 |
| H208  | 2.151184680   | 7.820193245   | -6.385513192 |
| H209  | 4.728455236   | 4.142185673   | -9.191268068 |
| H210  | -0.029279106  | 0.206684431   | -4.631828823 |
| H211  | 0.484430064   | -2.583556492  | -5.804804641 |
| H212  | 3.163573143   | 5.448714547   | -6.203620931 |
| H213  | 0.944138106   | 6.128769704   | -8.023965230 |
| H214  | 5.283370756   | 5.333036686   | -6.547335114 |
| H215  | 3.389496400   | -2.211966341  | -4.996101456 |
| H216  | 4.358938920   | 2.927676494   | -6.408310078 |
| H217  | 6.352193035   | 4.979124427   | -7.747789422 |
| H218  | -1.444579023  | -0.271313780  | -7.954775657 |
| H219  | -0.835258218  | -1.184271457  | -3.934537023 |
| H220  | 7.080967562   | 1.919228087   | -5.706043675 |
| H221  | 1.234729468   | -2.138422395  | -4.279884642 |

|      |               |              |              |
|------|---------------|--------------|--------------|
| H222 | -5.573055826  | -0.521360105 | 0.036835294  |
| H223 | -3.332295822  | -0.845991384 | -1.247774741 |
| H224 | -7.893050363  | -2.296831789 | -3.699844463 |
| H225 | -5.488402747  | -0.864035046 | -4.753244583 |
| H226 | -8.080507788  | 1.107213100  | -1.806450184 |
| H227 | -12.532974421 | 2.731692807  | 0.538824181  |
| H228 | -10.126958747 | -0.287461176 | 0.272445020  |
| H229 | -10.738370156 | 1.149715825  | -2.026590642 |
| H230 | -9.282455443  | 2.672033988  | 0.224545970  |
| H231 | -13.162603509 | 5.597612515  | -2.515077569 |
| H232 | -5.171877164  | 1.917828214  | 0.428878599  |
| H233 | -5.671009660  | 2.284500071  | -1.229206348 |
| H234 | -13.943606633 | 4.706303868  | -0.252017459 |
| H235 | -9.674409020  | 2.519970263  | -2.346843920 |
| H236 | -5.977211957  | 0.311965912  | -2.746566431 |
| H237 | -6.264058782  | -2.972299922 | -3.687587066 |
| H238 | -7.697109145  | 1.434266840  | -6.267454218 |
| H239 | -0.880433811  | 2.469129202  | -2.051971493 |
| H240 | -7.040838090  | 0.197923835  | -7.352967562 |
| H241 | 4.118314022   | 0.438924169  | 10.331406056 |
| H242 | 3.098941107   | 0.677903319  | 9.074600018  |
| H243 | -1.364441876  | 5.161676063  | 3.276421696  |
| H244 | -3.547358254  | 3.617054997  | 2.212580075  |
| H245 | -3.195759442  | 5.321051286  | 5.303038314  |
| H246 | -3.220609442  | 3.364621764  | -1.362954998 |
| H247 | -4.327752715  | 4.793445654  | -2.874977312 |
| H248 | -4.253891558  | 5.311182058  | -5.049921127 |
| H249 | -5.266628154  | 4.999694253  | -1.617345663 |
| H250 | -2.425867523  | 3.738936558  | -5.161840361 |
| H251 | -3.713848249  | 3.610375123  | -6.402202483 |
| H252 | -5.276202058  | 9.316017716  | 4.878640463  |
| H253 | -6.879696702  | 10.072862002 | 4.805058011  |
| H254 | -4.420445227  | 9.426784116  | 2.819962746  |
| H255 | -5.334890022  | 9.049068660  | 1.364925864  |
| H256 | -4.455975574  | 10.695954727 | -1.029992168 |
| H257 | -1.537289116  | 7.559978574  | -2.274301747 |
| H258 | -9.382057902  | 6.292956788  | -1.181879024 |
| H259 | -7.688130367  | 4.305537293  | 3.050711086  |
| H260 | -5.853034822  | 7.456800577  | -0.908371733 |
| H261 | -0.168734054  | 6.541865394  | 1.559279621  |
| H262 | -0.613495612  | 7.307050374  | 3.721084091  |
| H263 | -1.828430570  | 5.816271921  | -0.239284726 |
| H264 | -4.888687221  | 0.865113875  | -6.800584708 |
| H265 | -0.812059270  | 9.946592117  | 5.640042454  |
| H266 | -2.139855229  | 1.550228104  | -6.205931061 |
| H267 | -0.353334070  | 8.213700043  | 1.033874507  |
| H268 | -6.152537577  | 4.619876449  | 1.149053891  |
| H269 | -2.024666627  | 8.860978120  | 6.351786443  |
| H270 | -2.887144769  | 10.193650532 | -1.555933752 |
| H271 | -6.193916093  | 9.118812371  | -1.239702130 |
| H272 | -0.010899593  | 0.052985194  | -7.155707275 |
| H273 | -1.758030792  | -1.761712871 | -6.220045088 |
| H274 | -10.897495047 | 6.090679814  | 0.772021778  |
| H275 | -3.566162015  | 2.025143851  | -3.775832851 |
| H276 | -2.711254098  | 8.248408800  | 1.816009477  |
| H277 | -1.585318224  | 8.760789496  | -0.974673327 |
| H278 | -0.271254170  | 6.442133555  | -0.744937690 |
| H279 | -3.747937352  | 6.698413870  | -1.425202670 |
| H280 | -5.559301062  | 3.956175479  | 6.335716414  |
| H281 | -5.544075779  | 6.616324201  | 4.537500523  |
| H282 | -6.914968568  | 8.334948091  | 6.443842395  |
| H283 | -4.372499064  | 4.923630036  | 7.244764618  |
| H284 | -8.165112283  | 6.023985113  | 4.347779811  |
| H285 | 9.286623575   | 4.634365009  | -2.606942179 |
| H286 | 9.525751669   | 2.896459156  | -2.887410862 |
| H287 | 10.793044248  | 0.226424903  | 0.601954167  |
| H288 | 11.286518001  | 4.084406643  | -3.961747515 |
| H289 | 10.297632742  | 3.591564418  | -5.169122944 |
| H290 | 1.771455102   | 4.113450848  | 5.779724392  |
| H291 | -0.180231441  | 4.748368672  | 8.035717296  |
| H292 | 0.781997033   | 8.253464236  | 5.757376258  |
| H293 | -0.010755700  | 4.073991168  | 5.602516465  |
| H294 | 0.743760742   | 5.952313922  | 8.646719810  |
| H295 | 5.676629104   | 6.945869087  | 1.919027792  |
| H296 | 1.692224208   | 6.444303425  | 6.545515355  |
| H297 | 4.967604280   | -8.428689154 | 2.689149752  |
| H298 | 7.794967028   | -7.276731297 | 2.393872268  |
| H299 | 5.137891884   | 5.977923389  | -0.060852303 |
| H300 | 2.039969971   | -2.481290773 | 5.194651085  |
| H301 | 3.791368521   | 7.422789168  | -3.033365286 |
| H302 | 2.390813817   | 1.531071831  | -4.103754501 |
| H303 | 2.598960631   | 6.559652947  | -2.052075484 |

|       |               |               |              |
|-------|---------------|---------------|--------------|
| H304  | 3.147608480   | -6.349803829  | 2.848537017  |
| H305  | 4.584862615   | 4.864782717   | -1.659063197 |
| H306  | 4.069565660   | -5.565875996  | 1.562104371  |
| H307  | 5.584898673   | -7.441257030  | 1.343339462  |
| H308  | 6.109348586   | -5.598043524  | 3.060189449  |
| H309  | 5.191466460   | -6.524669418  | 4.258503164  |
| H310  | -0.010211673  | 4.146381295   | -7.243084611 |
| H311  | 6.759116733   | -10.036100026 | 1.882310523  |
| H312  | 8.120245556   | -10.282136288 | -0.831527757 |
| H313  | 2.109526732   | 2.700988640   | -1.930985234 |
| H314  | 7.876985354   | -12.251565917 | 1.310249450  |
| H315  | 7.109308937   | -12.179188924 | -0.135494254 |
| H316  | 4.584670996   | -3.735826851  | 3.156517084  |
| H317  | 0.805232476   | 4.789233596   | -1.804266696 |
| H318  | 1.421403713   | 2.504403003   | -6.178627704 |
| H319  | 11.366441431  | -5.526576643  | -0.260998731 |
| H320  | 10.494018342  | -2.462510713  | -0.844005307 |
| H321  | 8.971814879   | -5.445711417  | 0.636388828  |
| H322  | 11.646755667  | -5.125219792  | -1.735278612 |
| H323  | 6.622209742   | 8.861333107   | 0.127268757  |
| H324  | 7.151937134   | -3.220306110  | 1.971133788  |
| H325  | 5.238676291   | -5.811550587  | -1.750872817 |
| H326  | 7.056896686   | 4.225803965   | -2.317289602 |
| H327  | 7.352812881   | -5.641740106  | -2.724520309 |
| H328  | 9.352819739   | 0.310195813   | -4.674927389 |
| H329  | 7.058619421   | 0.032219694   | -3.636531832 |
| H330  | 9.439931752   | -10.977814280 | 0.114204912  |
| H331  | 3.596636480   | -2.141409857  | 4.484555696  |
| H332  | 8.452743412   | -4.508111453  | 3.493354080  |
| H333  | 7.037065637   | -2.458723463  | 3.316080069  |
| H334  | 8.480515557   | -6.675492663  | 4.373973774  |
| H335  | 1.493143453   | -5.607632963  | 3.667043219  |
| H336  | 8.799402210   | -2.976812571  | -3.160507329 |
| H337  | 9.177608446   | -4.088289756  | -1.839146317 |
| H338  | 6.922478930   | -4.403307251  | -3.913145480 |
| H339  | 5.062381287   | 3.064739532   | -3.095052193 |
| H340  | -0.162503608  | 5.802213604   | -3.891941774 |
| H341  | -0.786707216  | 5.460119645   | -6.323014145 |
| H342  | 4.460316301   | -4.423680206  | -0.959135171 |
| H343  | 9.485238875   | -5.390874832  | 2.730559847  |
| H344  | 9.688632472   | -6.767037008  | 1.004120582  |
| H345  | 0.976886356   | -4.487049162  | 4.863858664  |
| H346  | 11.233721816  | -0.376671102  | -3.066611714 |
| H347  | 9.274366376   | -1.740027622  | 0.195066332  |
| H348  | 5.540142423   | 3.491440531   | -4.764457868 |
| H349  | 4.218967310   | 7.954720019   | 1.788168332  |
| H350  | 3.400476506   | -2.642223862  | 7.600641719  |
| H351  | 4.039538577   | -1.098896956  | 6.985384106  |
| H352  | 13.061127465  | 0.038090058   | -0.027407624 |
| H353  | 12.812541896  | -1.358955898  | -0.846710343 |
| H354  | 12.525969431  | -4.560405738  | 2.348630461  |
| H355  | 11.833957293  | -3.327880401  | 0.564815557  |
| H356  | 13.994611968  | -2.303406856  | 2.853328942  |
| H357  | 11.289286836  | -3.710004997  | 3.299975109  |
| H358  | 6.071079966   | -1.198926669  | 8.777124702  |
| H359  | -10.874040258 | 6.284082080   | 6.221379583  |
| H360  | 7.965960560   | -8.642260426  | 6.594081996  |
| H361  | 6.812337448   | -6.146419432  | 6.732228481  |
| H362  | -10.458991076 | 7.362936262   | 3.418505279  |
| H363  | -10.038593356 | 4.356929836   | 3.950624659  |
| H364  | -11.352679697 | 5.057774724   | 2.985259449  |
| H365  | 0.973709407   | -0.797492537  | 2.697098510  |
| H366  | -7.294433670  | 5.818459814   | -2.000365599 |
| H367  | 2.480402194   | -1.232416925  | 2.182163501  |
| H368  | 1.215825119   | -1.320430177  | 1.117229070  |
| M0369 | 6.200314044   | -1.104046226  | -0.601514035 |
| N370  | 1.607810176   | -0.779580239  | 1.894076322  |
| N371  | -0.614852184  | 1.127201316   | 1.237612198  |
| N372  | -1.719034794  | 1.025020171   | 1.297379612  |
| N373  | -0.812274910  | -4.756116322  | -8.734175658 |
| N374  | -4.435890360  | -4.577521029  | -7.805214081 |
| N375  | -5.154677771  | -6.759521154  | -6.190360561 |
| N376  | -2.885638194  | -7.285314876  | -4.589955221 |
| N377  | -2.914373748  | -5.012546334  | -2.905779962 |
| N378  | -5.390818357  | -5.593678492  | -1.564927301 |
| N379  | -4.935102752  | -8.181000365  | -0.326954287 |
| N380  | -2.172413270  | -8.604507111  | 0.547264402  |
| N381  | -1.532686438  | -6.148056232  | 1.632876968  |
| N382  | -3.800479409  | -4.683948340  | 3.104619545  |
| N383  | -5.295518764  | -6.912651595  | 4.205165525  |
| N384  | 7.434123892   | -11.610407786 | 0.648261905  |
| N385  | 7.401231575   | -9.236383969  | 1.889967582  |

|      |               |              |              |
|------|---------------|--------------|--------------|
| N386 | 3.801344165   | -4.387420952 | 3.261725505  |
| N387 | 1.741851307   | -4.833839215 | 4.292059643  |
| N388 | 2.841804517   | -2.821389151 | 4.671327739  |
| N389 | 8.081783534   | -7.504354462 | 4.869110305  |
| N390 | -1.044271384  | 0.086291138  | -7.084828433 |
| N391 | 3.1966618229  | -1.529521301 | -5.736400911 |
| N392 | -2.891180255  | 1.204338139  | -5.588518812 |
| N393 | -5.622539781  | 1.110967124  | -6.140698184 |
| N394 | -6.483350248  | -1.097509591 | -4.626372090 |
| N395 | -6.204504935  | -0.281854999 | -1.946086794 |
| N396 | -2.933780598  | 2.378684479  | -1.367210927 |
| N397 | -1.767371134  | 0.528718434  | -1.793167158 |
| N398 | -8.286905782  | 1.122658551  | -0.810312503 |
| N399 | -11.674031857 | 4.042262592  | -2.400064590 |
| N400 | -13.167006632 | 4.320102232  | -0.782271295 |
| N401 | 3.983314119   | 0.234373166  | 9.338054615  |
| N402 | 0.725152037   | 5.217603190  | 7.933765757  |
| N403 | -0.187109296  | 7.973001835  | 5.883904026  |
| N404 | -1.427134290  | 7.851109518  | 3.404726731  |
| N405 | -3.352909579  | 7.647099707  | -1.246473508 |
| N406 | -3.782938896  | 9.945973143  | -1.151379769 |
| N407 | -5.519243892  | 8.424039658  | -0.930747052 |
| N408 | -2.363628045  | 5.149923984  | 3.008190123  |
| N409 | -4.133784481  | 4.933079434  | 5.166708580  |
| N410 | -6.178684577  | 6.787079830  | 5.317131842  |
| N411 | -5.327371479  | 9.331515480  | 2.344186047  |
| N412 | -8.881991004  | 6.685159677  | 4.634739479  |
| N413 | 10.365248377  | 4.238489406  | -4.376603270 |
| N414 | 6.915371401   | 4.026391158  | -3.311544640 |
| N415 | 4.406544608   | 5.539083770  | -2.423369714 |
| N416 | 4.850011299   | 6.960516460  | 0.019519389  |
| N417 | 5.385502339   | 5.258456260  | -7.567286513 |
| N418 | 2.566890808   | 5.384189640  | -7.035122859 |
| N419 | 12.367078544  | -0.475368871 | -0.579502572 |
| N420 | 8.141715027   | -0.636845988 | -1.893136105 |
| N421 | 9.203342677   | 0.005655856  | -3.717123666 |
| N422 | 11.865964708  | -2.815721257 | 1.449880227  |
| O423 | -2.605399989  | -4.879450631 | -6.485127931 |
| O424 | -5.738740123  | -5.325904270 | -4.514481547 |
| O425 | -4.196800058  | -8.538560960 | -3.201257936 |
| O426 | -2.058598748  | -6.352285569 | -1.272859897 |
| O427 | -4.505213437  | -4.468132570 | 0.200668092  |
| O428 | -6.189032697  | -7.373353472 | 1.409842332  |
| O429 | -3.043019122  | -9.895890282 | 2.230927804  |
| O430 | 0.386000225   | -6.983336043 | 2.593042041  |
| O431 | -2.074776560  | -4.658184084 | 4.602884964  |
| O432 | -5.137271982  | -5.782098597 | 6.167849613  |
| O433 | -4.877822180  | -9.217629183 | 6.918802763  |
| O434 | 9.356408162   | -8.520139627 | 0.881778197  |
| O435 | 6.806103321   | -9.411799719 | 4.703666115  |
| O436 | 8.176480642   | -6.287236497 | 8.243480141  |
| O437 | -3.546407766  | -0.777043173 | -4.623004107 |
| O438 | 1.759714086   | -0.165822206 | -6.847792008 |
| O439 | -6.067842954  | 1.980173445  | -4.077485684 |
| O440 | -4.314487551  | 4.454534385  | -4.590740431 |
| O441 | -8.656220559  | -0.697075712 | -5.259525081 |
| O442 | -6.942783770  | -2.311374997 | -1.201051426 |
| O443 | -7.550308588  | 0.581206092  | 1.278562102  |
| O444 | -10.971332728 | 1.113369917  | 1.494207581  |
| O445 | 5.521557998   | -2.887150198 | 9.785376545  |
| O446 | -1.915330448  | 0.398103455  | 6.709733316  |
| O447 | -1.609470400  | 6.286471281  | 6.466380437  |
| O448 | -2.906212797  | 9.518085668  | 3.972934124  |
| O449 | -4.042906038  | 6.139195507  | 1.813257350  |
| O450 | -5.324354036  | 3.350219052  | 4.006368164  |
| O451 | -1.987613003  | 2.873405475  | 5.096096963  |
| O452 | -6.604845715  | 6.237875419  | 7.501831611  |
| O453 | -9.219178862  | 8.833186459  | 5.317452530  |
| O454 | -7.463586013  | 8.536534379  | 2.522968007  |
| O455 | -12.450725347 | 6.738840813  | 5.003366728  |
| O456 | -6.780838715  | 5.656259580  | -1.186144631 |
| O457 | 7.907725176   | 3.293255288  | -5.249491154 |
| O458 | 4.444135225   | 5.778807131  | -4.703278526 |
| O459 | 3.683137910   | 8.734635168  | -0.798626604 |
| O460 | 6.128187164   | 9.760625014  | 1.891246716  |
| O461 | 2.312578235   | 4.610337551  | -9.165464931 |
| O462 | 5.485921137   | -0.190288347 | -7.276567618 |
| O463 | 6.701322571   | 0.996102648  | -5.831810092 |
| O464 | 0.220520678   | 7.739901071  | -5.739775461 |
| O465 | 11.597612852  | -0.919420427 | 2.661677056  |
| O466 | 13.460893971  | -3.109783571 | 4.650004393  |
| O467 | 4.174914033   | -3.232211270 | -3.509407804 |

|      |              |              |              |
|------|--------------|--------------|--------------|
| O468 | 3.397665565  | -5.345023451 | -3.510292596 |
| O469 | 10.940296534 | -5.018974125 | -3.332364322 |
| O470 | 9.362494355  | -5.085579323 | -4.951137763 |
| O471 | 7.234472929  | -2.902147467 | 0.153859803  |
| O472 | 7.371322906  | -5.138149135 | -0.018299552 |
| O473 | 6.076688389  | -2.567654149 | -2.166401463 |
| O474 | 9.153980037  | -5.187487928 | 3.649628029  |
| O475 | 7.028351668  | -3.361817603 | 2.946744004  |
| O476 | -4.330465666 | 5.036815220  | -1.913373199 |
| O477 | 12.105142215 | -5.256256897 | -0.851487909 |
| O478 | 9.818846592  | -5.785453718 | 1.031692137  |
| S479 | 1.014594103  | 5.378726894  | 3.830583325  |
| S480 | 1.870729351  | 3.494874736  | 0.661754267  |
| S481 | 5.072863238  | 0.501530517  | -1.976752198 |
| S482 | 1.638019935  | 1.574215852  | 3.558629635  |
| S483 | 1.672664638  | 0.364426372  | -0.871923982 |
| S484 | 5.863641968  | 3.691380631  | -0.108262968 |
| S485 | 4.317639634  | -2.009291709 | 0.595755325  |
| S486 | 4.498843572  | 3.612729318  | 3.334777930  |
| S487 | 7.199626459  | 0.285228867  | 1.052240110  |
| S488 | 4.952839918  | -0.249669322 | 3.992021327  |
| end  |              |              |              |

| <b>Fe6-NH3<br/>2N2 associated<br/>35, S=1</b> | <b>bmexpprot2n2x6nh31.car_2</b> |              |               |              |
|-----------------------------------------------|---------------------------------|--------------|---------------|--------------|
| <b>Fe (139) -2.415</b>                        | C1                              | -7.522959862 | -5.812281982  | 0.290854687  |
| <b>Fe (140) -0.918</b>                        | C2                              | -7.631335450 | -7.001099916  | -0.669100925 |
| <b>Fe (141) -2.703</b>                        | C3                              | -8.682938135 | -3.875122023  | 1.255866354  |
| <b>Fe (142) 2.527</b>                         | C4                              | -8.298481746 | -4.021237464  | 2.724809047  |
| <b>Fe (143) 2.801</b>                         | C5                              | -8.114432749 | -5.488938994  | 4.672153035  |
| <b>Fe (144) 2.254</b>                         | C6                              | -6.601078251 | -5.467065986  | 4.909433325  |
| <b>Fe (145) 0.371</b>                         | C7                              | -4.362365658 | -5.659026135  | 3.958294305  |
|                                               | C8                              | -3.941274871 | -4.185610200  | 3.980820012  |
|                                               | C9                              | -4.405199847 | -1.943534516  | 3.099187432  |
|                                               | C10                             | -4.698595032 | -1.295091779  | 4.459640767  |
|                                               | C11                             | -6.155278941 | -1.131175958  | 6.385197996  |
|                                               | C12                             | -5.260049668 | -1.575229876  | 7.550801533  |
|                                               | C13                             | -4.338944642 | -3.482910201  | 8.790665331  |
|                                               | C14                             | -2.816008928 | -3.672302957  | 8.730287089  |
|                                               | C15                             | -0.888371530 | -4.330301021  | 7.345212712  |
|                                               | C16                             | -0.135223518 | -3.191496944  | 6.656470145  |
|                                               | C17                             | -0.338771644 | -1.061732770  | 5.434276014  |
|                                               | C18                             | -0.432614581 | 0.188516172   | 6.330506650  |
|                                               | C19                             | -0.871508162 | -0.883838256  | 3.994232704  |
|                                               | C20                             | -0.344787556 | 0.404388620   | 3.3515804196 |
|                                               | C21                             | -0.525693822 | -2.120324746  | 3.157711227  |
|                                               | C22                             | -1.844431682 | 1.945426228   | 7.303466694  |
|                                               | C23                             | -1.731335785 | 1.706319277   | 8.821095588  |
|                                               | C24                             | -3.159471541 | 2.654601067   | 6.897214627  |
|                                               | C25                             | -3.444837136 | 3.863364392   | 7.795202418  |
|                                               | C26                             | -3.105604627 | 3.081406519   | 5.424322086  |
|                                               | C27                             | -2.422002110 | 0.433538229   | 10.768840847 |
|                                               | C28                             | -1.013505098 | 0.309454934   | 11.312186679 |
|                                               | C29                             | 5.692613539  | -11.028643581 | 5.459180819  |
|                                               | C30                             | 6.362214646  | -9.748926500  | 4.967543154  |
|                                               | C31                             | 6.419931418  | -7.289471250  | 5.352074663  |
|                                               | C32                             | 7.435206148  | -6.759014532  | 6.380141568  |
|                                               | C33                             | 5.160164446  | -6.409645075  | 5.302317876  |
|                                               | C34                             | 5.466273003  | -4.969476885  | 4.899480638  |
|                                               | C35                             | 4.199792222  | -4.178817040  | 4.578573222  |
|                                               | C36                             | 4.222962894  | -1.668615291  | 4.479146730  |
|                                               | C37                             | 9.594959513  | -5.639267854  | 6.676482994  |
|                                               | C38                             | 9.714156626  | -4.133696829  | 6.586549680  |
|                                               | C39                             | -4.812965149 | -3.098349822  | -2.332066198 |
|                                               | C40                             | -5.394944022 | -1.702726450  | -2.032289263 |
|                                               | C41                             | -3.304100371 | -3.096927331  | -2.009837119 |
|                                               | C42                             | -2.647940780 | -4.489593034  | -1.903399828 |
|                                               | C43                             | -2.131945678 | -5.094349646  | -3.209089224 |
|                                               | C44                             | -5.723802301 | 0.506535216   | -3.122262572 |
|                                               | C45                             | -7.018569269 | 0.961009101   | -2.440700325 |
|                                               | C46                             | -5.622352337 | 1.010784991   | -4.568743900 |
|                                               | C47                             | -9.297653416 | 0.354871271   | -1.782957779 |
|                                               | C48                             | -9.180856274 | 0.478727851   | -0.258751376 |
|                                               | C49                             | -7.802611868 | 0.154038413   | 1.738622052  |
|                                               | C50                             | -6.756119148 | 1.200750610   | 2.132308258  |
|                                               | C51                             | -5.129768657 | 2.897227847   | 1.438580411  |
|                                               | C52                             | -5.760519755 | 4.203173338   | 1.948414263  |
|                                               | C53                             | -4.299636304 | 3.270063146   | 0.199691834  |
|                                               | C54                             | -3.552797275 | 2.130451940   | -0.410374301 |
|                                               | C55                             | -3.195986162 | 0.876362704   | 0.044515831  |
|                                               | C56                             | -2.446614527 | 0.994132259   | -1.964806824 |
|                                               | C57                             | -7.579550848 | 5.802545056   | 1.541874667  |
|                                               | C58                             | -7.724856970 | 6.082770731   | 3.035219746  |

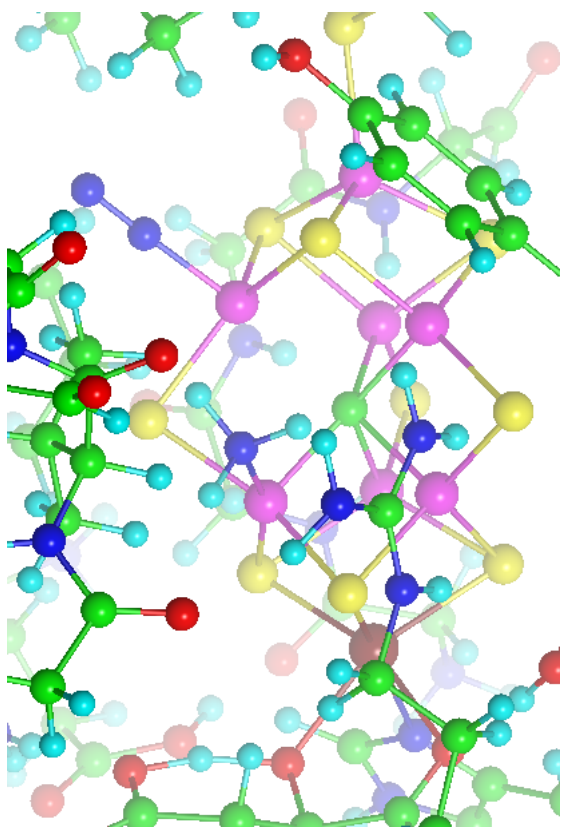

|       |               |               |              |
|-------|---------------|---------------|--------------|
| C59   | -8.972782291  | 5.729229664   | 0.868368269  |
| C60   | -9.646061357  | 7.035420335   | 0.568540796  |
| C61   | -9.755520867  | 8.190260302   | 1.319249101  |
| C62   | -10.804412684 | 8.427339415   | -0.618914731 |
| C63   | 8.392014493   | 2.439951401   | 4.830636342  |
| C64   | 9.507586679   | 1.414161667   | 4.905451762  |
| C65   | 7.103014608   | 1.675369755   | 4.435328245  |
| C66   | 5.883583654   | 2.565106180   | 4.382364084  |
| C67   | 5.090412997   | 2.790844211   | 5.522785693  |
| C68   | 5.512394661   | 3.206289017   | 3.185929886  |
| C69   | 3.961902366   | 3.616411263   | 5.475728945  |
| C70   | 4.398926723   | 4.044073703   | 3.126612783  |
| C71   | 3.620611436   | 4.246592901   | 4.271606209  |
| C72   | 5.160701542   | 7.066913295   | -0.891033773 |
| C73   | 4.117298449   | 8.106938385   | -1.342103336 |
| C74   | 4.479352002   | 5.735572946   | -0.608857976 |
| C75   | 3.322147145   | 9.533317647   | -3.193250902 |
| C76   | 1.933255967   | 9.036263228   | -3.605773122 |
| C77   | 0.449033619   | 7.039515946   | -3.739463597 |
| C78   | -0.269643353  | 6.761678999   | -2.393950720 |
| C79   | 0.728396189   | 5.753189492   | -4.548621786 |
| C80   | -0.428986642  | 4.795448909   | -4.853484812 |
| C81   | -1.420961506  | 5.235744335   | -5.942629975 |
| C82   | -3.105973297  | 7.070172882   | -5.843789747 |
| C83   | -0.150959773  | 5.932105421   | -0.095757154 |
| C84   | -0.529875848  | 7.185840468   | 0.703557042  |
| C85   | 0.738677075   | 5.060113689   | 0.811786902  |
| C86   | 0.321386025   | 9.330788590   | 1.518041967  |
| C87   | -0.287698369  | 10.631739764  | 1.022218791  |
| C88   | -1.448273932  | 11.761526752  | -0.797791801 |
| C89   | -2.842556305  | 12.279049213  | -0.367555529 |
| C90   | -1.335732018  | 11.697829475  | -2.323983372 |
| C91   | -2.341962665  | 10.762977457  | -2.984435391 |
| C92   | -4.995047639  | 11.750920829  | 0.671967334  |
| C93   | -5.144875780  | 12.916130723  | 1.638827996  |
| C94   | -5.702506711  | 10.491573829  | 1.246792558  |
| C95   | -5.704191679  | 9.348330925   | 0.259054392  |
| C96   | -6.727146092  | 9.227801848   | -0.693654467 |
| C97   | -4.649307695  | 8.420105318   | 0.216050123  |
| C98   | -6.685763211  | 8.236536104   | -1.678103455 |
| C99   | -4.574606783  | 7.441897961   | -0.779061130 |
| C100  | -5.595204450  | 7.367172215   | -1.724049747 |
| C101  | 5.838053813   | -4.207920323  | -7.894847919 |
| C102  | 4.343607627   | -4.016342923  | -7.697038591 |
| C103  | 2.607664835   | -2.509577345  | -6.753603224 |
| C104  | 2.141111986   | -1.226325949  | -7.452346261 |
| C105  | 2.382879646   | 1.218079431   | -7.503024034 |
| C106  | 3.530906531   | 2.221721312   | -7.562609717 |
| C107  | 5.657850197   | 3.025972108   | -6.710589189 |
| C108  | 6.386220915   | 3.243951959   | -8.021373904 |
| C109  | -0.849526729  | -4.173748428  | -9.288737114 |
| C110  | -1.967080644  | -3.125851296  | -9.219720603 |
| C111  | -0.592623913  | -4.752233143  | -7.877599381 |
| C112  | 0.243681770   | -6.043576753  | -7.943088056 |
| C113  | 0.709720134   | -6.450692224  | -6.563014481 |
| C114  | -2.593705161  | -0.802368540  | -8.803460611 |
| C115  | -2.063036289  | 0.474420409   | -9.425195417 |
| C116  | -3.254240058  | -0.619162344  | -7.416037340 |
| C117  | -2.213041268  | -0.494595801  | -6.340008266 |
| C118  | -1.589416953  | 0.736854623   | -6.079534528 |
| C119  | -1.740579471  | -1.649663045  | -5.691982788 |
| C120  | -0.467445507  | 0.792536863   | -5.248651369 |
| C121  | -0.619776740  | -1.590638276  | -4.863161119 |
| C122  | 0.040545312   | -0.373667440  | -4.671565821 |
| C123  | 8.995767949   | -6.045015365  | -2.908479531 |
| C124  | 9.976025111   | -5.986862450  | -1.726606923 |
| C125  | 7.585124374   | -6.406090039  | -2.420454629 |
| C126  | 6.475979941   | -6.299602498  | -3.419687048 |
| C127  | 6.339890633   | -6.993401036  | -4.604920166 |
| C128  | 4.467056124   | -5.888524149  | -4.186173369 |
| C129  | 10.908210112  | -7.014140416  | 0.262817340  |
| C130  | 12.333175443  | -6.692081281  | -0.131599358 |
| C131  | 1.032388776   | -6.708986905  | 0.358169806  |
| C132  | 2.448674370   | -6.680236153  | 0.933531249  |
| C133  | 3.568432912   | -6.859551689  | -0.131518977 |
| C134  | 3.629095043   | -8.342010445  | -0.592761712 |
| C135  | 4.860858399   | -8.725237622  | -1.417243238 |
| C136  | 5.005650209   | -10.241660889 | -1.680253433 |
| C137  | 4.929407140   | -6.507803523  | 0.490033420  |
| C138  | 3.970247963   | -0.625446323  | -1.528626008 |
| Fe139 | 4.599747633   | -1.931765226  | -2.928864587 |
| Fe140 | 2.189169461   | 0.902449929   | -1.447336285 |

|       |              |              |               |
|-------|--------------|--------------|---------------|
| Fe141 | 4.999732884  | 0.780684078  | -0.514549713  |
| Fe142 | 4.434071128  | 0.571834767  | -3.012290721  |
| Fe143 | 3.965363481  | 2.860756016  | -1.739835881  |
| Fe144 | 5.275949111  | -1.758751072 | -0.474401282  |
| Fe145 | 2.741542701  | -2.018769546 | -0.833421696  |
| H146  | -5.824412076 | -7.850618022 | -0.255329943  |
| H147  | -5.815646047 | -6.931273503 | -1.602196600  |
| H148  | -9.489296800 | -5.330931337 | -0.077867793  |
| H149  | -8.197037097 | -6.684842684 | -1.560054359  |
| H150  | -8.256578631 | -7.760872075 | -0.169179832  |
| H151  | -7.983289463 | -3.146555764 | 0.820390781   |
| H152  | -8.908413303 | -5.975394993 | 2.733289734   |
| H153  | -9.691115248 | -3.442256930 | 1.207766344   |
| H154  | -8.505423362 | -6.470769770 | 4.969087045   |
| H155  | -6.220643611 | -5.968215565 | 2.942777283   |
| H156  | -8.547111965 | -4.736610419 | 5.345220745   |
| H157  | -3.375066179 | -1.685580695 | 2.827301952   |
| H158  | -5.270390616 | -3.795108083 | 2.463571292   |
| H159  | -3.899190093 | -6.157042195 | 3.095573472   |
| H160  | -6.085965288 | -0.036899287 | 6.326628199   |
| H161  | -6.482661773 | -2.320968116 | 4.616082979   |
| H162  | -3.984428383 | -6.126660126 | 4.875412005   |
| H163  | -5.070182818 | -1.518623384 | 2.335912225   |
| H164  | -5.406305583 | -3.538687453 | 6.936649494   |
| H165  | -7.192884342 | -1.405633161 | 6.621171463   |
| H166  | -0.999831003 | -3.026587111 | 3.558337232   |
| H167  | -0.853734186 | -1.993726772 | 2.114573661   |
| H168  | 0.562712729  | -2.296020944 | 3.157197868   |
| H169  | -1.965857902 | -0.795504530 | 4.061878852   |
| H170  | -4.789551722 | -4.469383011 | 8.977071294   |
| H171  | -2.952220924 | 2.229229033  | 4.747976291   |
| H172  | -3.108550273 | 0.142657086  | 8.769817368   |
| H173  | -3.577075188 | 3.578194940  | 8.849395109   |
| H174  | 0.751082635  | 0.387155415  | 3.242617006   |
| H175  | -0.612020368 | 1.294732535  | 3.938871417   |
| H176  | 8.246708144  | 2.850725707  | 5.847987597   |
| H177  | -4.045752262 | 3.569019179  | 5.128241320   |
| H178  | -4.367469106 | 4.360908727  | 7.461798655   |
| H179  | -2.285521143 | 3.800746262  | 5.263576290   |
| H180  | -2.622605547 | 4.594189590  | 7.741691936   |
| H181  | -3.984000138 | 1.929591993  | 7.024505578   |
| H182  | -0.997542167 | 2.609214761  | 7.071280564   |
| H183  | -2.477481453 | 0.316885094  | 6.045287146   |
| H184  | -0.783628311 | 0.527320048  | 2.349870994   |
| H185  | 1.202880992  | 4.267344482  | 0.208341747   |
| H186  | 0.078467273  | 4.591513948  | 1.556760992   |
| H187  | 1.874030164  | 5.505269561  | 2.362300486   |
| H188  | 2.021190864  | 5.080799190  | 4.987594000   |
| H189  | 4.109506022  | 4.518913697  | 2.188392834   |
| H190  | 6.089748886  | 3.026652925  | 2.276538350   |
| H191  | 5.352737786  | 2.305598786  | 6.467267814   |
| H192  | -1.910785326 | -2.381096761 | 6.043132579   |
| H193  | -0.730175657 | -5.241365166 | 6.749192863   |
| H194  | -0.417210766 | -4.483273286 | 8.324688370   |
| H195  | -2.916613115 | -4.211784268 | 6.724969018   |
| H196  | -4.533860587 | -2.840759789 | 9.657396043   |
| H197  | 3.346421369  | 3.767066503  | 6.366072835   |
| H198  | 0.740376100  | -1.251862314 | 5.373398921   |
| H199  | -2.954011585 | 1.214944723  | 11.335986056  |
| H200  | -2.926598466 | -0.527666231 | 10.953101825  |
| H201  | -0.252729389 | -0.046184510 | 10.578533753  |
| H202  | 10.570106302 | -6.095824974 | 6.447334729   |
| H203  | -0.657471858 | -6.300655898 | -3.951856571  |
| H204  | 1.974278574  | -5.947966598 | -1.168359991  |
| H205  | -0.375462712 | -6.857283541 | -8.347988819  |
| H206  | 1.107316134  | -5.901323888 | -8.608703946  |
| H207  | -1.549420003 | -4.968556088 | -7.378047522  |
| H208  | -1.235296560 | 0.322371379  | -10.157423150 |
| H209  | -1.286596535 | -4.977910316 | -9.900334218  |
| H210  | -2.781793190 | -2.486201408 | -2.762513030  |
| H211  | -3.363852951 | -5.214697520 | -1.477122103  |
| H212  | -0.623724782 | -1.644991219 | -8.653223461  |
| H213  | -3.399567247 | -1.117944642 | -9.497962726  |
| H214  | 0.862243015  | -3.005946552 | -9.444597140  |
| H215  | -0.496941896 | -5.955546417 | -2.232242075  |
| H216  | -0.086908380 | -3.989052785 | -7.265119635  |
| H217  | 0.946239669  | -4.441326915 | -10.247074315 |
| H218  | -5.938260621 | -3.967159945 | -3.832606815  |
| H219  | -3.160534681 | -2.572274273 | -1.055548929  |
| H220  | 2.445858606  | -5.627983978 | -6.973735373  |
| H221  | -1.815867386 | -4.438104124 | -1.185488507  |
| H222  | -4.482584856 | 2.527814869  | 2.245713587   |

|      |               |              |              |
|------|---------------|--------------|--------------|
| H223 | -3.417241394  | 0.434835411  | 1.013599828  |
| H224 | -8.746673009  | 0.458930998  | 2.211639292  |
| H225 | -7.315546622  | -0.449903710 | -0.253780251 |
| H226 | -7.371652596  | 3.830206440  | 0.737394399  |
| H227 | -9.365519102  | 8.470821030  | 2.290519889  |
| H228 | -7.934323453  | 5.169540251  | 3.644434806  |
| H229 | -9.625791920  | 5.077754710  | 1.475833889  |
| H230 | -6.976874527  | 6.604299941  | 1.085741643  |
| H231 | -11.385882805 | 8.899676526  | -1.407030916 |
| H232 | -3.607542411  | 4.070632423  | 0.511382083  |
| H233 | -4.971327465  | 3.713127044  | -0.555060174 |
| H234 | -10.755702771 | 10.009799848 | 0.804883348  |
| H235 | -8.841330864  | 5.219872650  | -0.099055047 |
| H236 | -6.355916693  | 1.686166273  | 0.152725231  |
| H237 | -7.507659759  | -0.800342616 | 2.200680184  |
| H238 | -9.750388536  | 1.294530064  | -2.129362450 |
| H239 | -1.948240875  | 0.786421772  | -2.908209293 |
| H240 | -10.001880683 | -0.457482209 | -2.007262352 |
| H241 | 9.447334008   | 4.076329121  | 4.190653850  |
| H242 | 7.918166464   | 4.017852223  | 3.615458276  |
| H243 | 1.435056579   | 5.881591833  | -1.563273151 |
| H244 | -1.088689293  | 5.388914997  | -0.280729873 |
| H245 | 1.194072457   | 8.084056190  | 0.051971048  |
| H246 | -3.185227643  | 2.988315664  | -2.337999991 |
| H247 | -4.678203900  | 3.655485133  | -3.890506984 |
| H248 | -5.870896329  | 2.703613166  | -5.524888008 |
| H249 | -4.616731494  | 4.969114368  | -3.007681307 |
| H250 | -4.651668354  | 0.684843711  | -4.978034163 |
| H251 | -6.430290040  | 0.567592778  | -5.172704274 |
| H252 | -0.303571507  | 11.446092644 | -2.605579357 |
| H253 | -1.543264794  | 12.709815007 | -2.705082248 |
| H254 | -0.830975158  | 9.896229977  | -4.104886636 |
| H255 | -2.466165423  | 9.288738749  | -4.352916634 |
| H256 | -3.030279611  | 8.564168205  | -7.246720434 |
| H257 | -1.777260253  | 4.355384892  | -6.499703162 |
| H258 | -7.497670906  | 8.144511827  | -2.404244284 |
| H259 | -3.859055924  | 8.438657616  | 0.971478095  |
| H260 | -4.397976279  | 7.281036391  | -4.254828119 |
| H261 | 1.489419566   | 5.174061875  | -4.001255480 |
| H262 | 2.511684330   | 7.118381828  | -3.209246173 |
| H263 | -0.976630749  | 4.523158924  | -3.937491430 |
| H264 | -7.897219521  | -0.819182280 | -2.912300099 |
| H265 | 3.793758672   | 9.983109368  | -4.077116215 |
| H266 | -5.272060144  | -1.451731805 | -3.999499856 |
| H267 | 1.201605723   | 6.062349904  | -5.495522830 |
| H268 | -3.716920688  | 6.769595505  | -0.825981866 |
| H269 | 3.154211526   | 10.334568260 | -2.459109387 |
| H270 | -2.150317205  | 7.136480614  | -7.666241907 |
| H271 | -4.695579898  | 8.332602454  | -5.595851858 |
| H272 | -4.285819643  | -4.048639434 | -4.078609583 |
| H273 | -5.310681719  | -3.777593353 | -1.613557038 |
| H274 | -7.576080717  | 9.915442131  | -0.670902376 |
| H275 | -4.920133333  | 0.968233173  | -2.531548394 |
| H276 | -0.203049703  | 7.723551890  | -4.292619808 |
| H277 | -0.908418373  | 5.885706615  | -6.664458108 |
| H278 | 0.035347898   | 3.864001119  | -5.208708426 |
| H279 | -3.118785920  | 5.414351566  | -4.659930507 |
| H280 | -0.239409787  | 9.020805009  | 2.412336397  |
| H281 | -0.974271968  | 9.663080319  | -0.643440513 |
| H282 | -0.768212646  | 12.557414895 | -0.456899236 |
| H283 | 1.354503978   | 9.550107850  | 1.820124791  |
| H284 | -3.269011678  | 10.500210522 | 0.511841624  |
| H285 | 6.323837725   | -3.232904599 | -8.047349919 |
| H286 | 6.212636763   | -4.603984402 | -6.927626357 |
| H287 | 8.984286100   | -5.026902252 | -3.323902956 |
| H288 | 7.065350442   | -5.405292113 | -8.997290686 |
| H289 | 5.507212445   | -5.909770911 | -8.957382582 |
| H290 | 5.249648159   | 5.023776308  | -0.283430469 |
| H291 | 5.183334829   | 7.762370130  | 1.028870044  |
| H292 | 4.940091185   | 8.139519538  | -3.228505965 |
| H293 | 3.733329412   | 5.854940126  | 0.189536952  |
| H294 | 6.384394398   | 8.380021013  | 0.108282513  |
| H295 | 6.401978122   | 2.691969701  | -5.970293283 |
| H296 | 5.902631072   | 6.925441310  | -1.692832587 |
| H297 | 4.659509626   | -6.440838110 | 6.284318458  |
| H298 | 6.880048469   | -7.313081480 | 4.356370527  |
| H299 | 4.702512816   | 1.198910744  | -6.168046342 |
| H300 | 4.406932531   | 0.351748115  | 4.157265898  |
| H301 | 2.004986409   | 1.080443853  | -8.523359154 |
| H302 | -0.257984490  | -2.488088695 | -4.356701029 |
| H303 | 1.577236459   | 1.702707209  | -6.925528621 |
| H304 | 3.585155019   | -4.040154007 | 5.475446592  |



|       |              |               |              |
|-------|--------------|---------------|--------------|
| H305  | 3.216438639  | -0.179342973  | -6.073504895 |
| H306  | 3.583757209  | -4.721889009  | 3.843411211  |
| H307  | 4.481396435  | -6.866284052  | 4.564633749  |
| H308  | 6.107048824  | -4.966967022  | 4.004836565  |
| H309  | 6.020876153  | -4.449159819  | 5.696425864  |
| H310  | -3.899523593 | -1.490469326  | -7.236075583 |
| H311  | 5.433832209  | -8.836587529  | 6.486887559  |
| H312  | 4.899074468  | -11.247825907 | 4.728270624  |
| H313  | 0.915965780  | -0.328333833  | -4.024483069 |
| H314  | 5.768559851  | -11.147646736 | 7.515050086  |
| H315  | 4.307492223  | -11.545429251 | 6.889928039  |
| H316  | 5.159229435  | -2.912973349  | 3.187469730  |
| H317  | 0.027458344  | 1.743239526   | -5.041895113 |
| H318  | -2.248729098 | -2.603657712  | -5.849429084 |
| H319  | 8.318949927  | -9.533598286  | 0.384348896  |
| H320  | 7.593563579  | -7.446768936  | -2.050692483 |
| H321  | 6.966643974  | -7.745081539  | 1.599171942  |
| H322  | 7.695702345  | -10.257806778 | -0.841160401 |
| H323  | 6.341005445  | 2.383523444   | -8.731767356 |
| H324  | 6.597855086  | -4.650692716  | 1.207297866  |
| H325  | 2.535884013  | -7.431139547  | 1.727456544  |
| H326  | 4.703493115  | -2.222257927  | -6.774902826 |
| H327  | 3.610508986  | -8.955507460  | 0.321457333  |
| H328  | 4.634636762  | -7.122542250  | -5.890405619 |
| H329  | 3.447004622  | -5.544765307  | -4.298191021 |
| H330  | 6.437923241  | -11.836500519 | 5.369672885  |
| H331  | 5.294223840  | -0.626855170  | 3.016719740  |
| H332  | 8.365531036  | -5.229731490  | 2.656812088  |
| H333  | 7.312172100  | -3.292784979  | 1.428238497  |
| H334  | 8.658617506  | -6.136808035  | 4.806027719  |
| H335  | 2.778491757  | -2.256893212  | 5.864048230  |
| H336  | 4.819716322  | -8.223587939  | -2.396683799 |
| H337  | 5.778915928  | -8.380540258  | -0.921306764 |
| H338  | 2.713335223  | -8.578867883  | -1.155178248 |
| H339  | 2.544316613  | -2.398393410  | -5.659599121 |
| H340  | -1.966164344 | 1.643313653   | -6.561058449 |
| H341  | -3.893492663 | 0.275382198   | -7.475979959 |
| H342  | 2.564595579  | -5.685367471  | 1.397595565  |
| H343  | 8.625615779  | -6.763215487  | 2.576986820  |
| H344  | 7.619752998  | -8.746044343  | 2.583438494  |
| H345  | 3.160340499  | -0.583616156  | 5.840644973  |
| H346  | 7.017787631  | -7.667512737  | -5.115877975 |
| H347  | 7.333073906  | -5.782048711  | -1.555260130 |
| H348  | 1.955509721  | -3.325268136  | -7.073131077 |
| H349  | 5.246746762  | 3.987182653   | -6.364663644 |
| H350  | 6.951563214  | 0.871087546   | 5.170649497  |
| H351  | 7.264552908  | 1.205410031   | 3.451589471  |
| H352  | 10.388488780 | -6.659567037  | -4.282704183 |
| H353  | 9.564999451  | -7.900486082  | -3.605162277 |
| H354  | 10.913250358 | -8.016033684  | 0.719628712  |
| H355  | 9.400224394  | -7.864818953  | -0.981124735 |
| H356  | 12.610385895 | -6.990133987  | -1.171891051 |
| H357  | 10.567471655 | -6.301485818  | 1.031476172  |
| H358  | 9.959695600  | 1.159736899   | 3.916058490  |
| H359  | -4.238957598 | 13.154694369  | 2.244190507  |
| H360  | 9.346076912  | -5.880618891  | 7.724932022  |
| H361  | 8.784626804  | -3.602110120  | 6.268609821  |
| H362  | -5.492895270 | 12.040467357  | -0.269139054 |
| H363  | -5.204397230 | 10.193390648  | 2.182869806  |
| H364  | -6.731646224 | 10.783873406  | 1.499724489  |
| H365  | 3.028245582  | -0.702309516  | 1.483476563  |
| H366  | -6.358080293 | 6.314321810   | -3.172037033 |
| H367  | 1.765343584  | -1.776998570  | 1.615166163  |
| H368  | 1.541926961  | -0.346425129  | 0.816658063  |
| Mo369 | 4.509343910  | -4.191005121  | -1.429182621 |
| N370  | 2.215450522  | -1.096516426  | 0.999722141  |
| N371  | 0.729520161  | 1.888792206   | -1.096882761 |
| N372  | -0.168670553 | 2.526552788   | -0.853931547 |
| N373  | -6.377884869 | -7.609150487  | -1.081418582 |
| N374  | -8.678771046 | -5.117069202  | 0.498027656  |
| N375  | -8.512605810 | -5.228818311  | 3.299736392  |
| N376  | -5.808149571 | -5.822075782  | 3.867599132  |
| N377  | -4.590887058 | -3.386470616  | 3.101751579  |
| N378  | -5.807739031 | -1.725974090  | 5.104580383  |
| N379  | -4.982041599 | -2.903621299  | 7.619072714  |
| N380  | -2.310351824 | -4.114353316  | 7.543966735  |
| N381  | -0.904742865 | -2.235266344  | 6.085609262  |
| N382  | -1.670626968 | 0.709541271   | 6.538090280  |
| N383  | -2.438887818 | 0.669606811   | 9.335859477  |
| N384  | 5.090314216  | -10.897070451 | 6.792159669  |
| N385  | 6.043281567  | -8.652731345  | 5.683192262  |
| N386  | 4.548451486  | -2.876547931  | 4.007619034  |

|      |               |              |               |
|------|---------------|--------------|---------------|
| N387 | 3.428378476   | -1.523747949 | 5.562221524   |
| N388 | 4.707419498   | -0.573944715 | 3.867273093   |
| N389 | 8.541925190   | -6.184928000 | 5.842816589   |
| N390 | -5.060530697  | -3.452111023 | -3.735953643  |
| N391 | -1.020598691  | -5.848599217 | -3.107373756  |
| N392 | -5.549107003  | -0.938504139 | -3.147385402  |
| N393 | -8.059759213  | 0.094293900  | -2.494072710  |
| N394 | -8.053048240  | -0.016381507 | 0.319660334   |
| N395 | -6.133632353  | 1.884140785  | 1.130566272   |
| N396 | -3.068343377  | 2.187561608  | -1.703170594  |
| N397 | -2.512864478  | 0.176414660  | -0.924919729  |
| N398 | -6.947228196  | 4.508087518  | 1.365790460   |
| N399 | -10.305481541 | 7.196830091  | -0.639785643  |
| N400 | -10.493648930 | 9.062438762  | 0.546315309   |
| N401 | 8.738628778   | 3.439900075  | 3.817745588   |
| N402 | 5.876431214   | 7.515185540  | 0.314887094   |
| N403 | 4.219202453   | 8.540035931  | -2.633742646  |
| N404 | 1.732870428   | 7.705415492  | -3.533263570  |
| N405 | -2.591888718  | 5.929601414  | -5.396407098  |
| N406 | -2.643216679  | 7.671025794  | -6.958991595  |
| N407 | -4.047387314  | 7.714823347  | -5.113690544  |
| N408 | 0.478227960   | 6.235338099  | -1.383759874  |
| N409 | 0.317654886   | 8.244354073  | 0.555929703   |
| N410 | -1.009690909  | 10.547431693 | -0.136155237  |
| N411 | -1.846932251  | 10.023131918 | -4.012845476  |
| N412 | -3.589913128  | 11.460850545 | 0.416623975   |
| N413 | 6.098061717   | -5.077571177 | -9.044823437  |
| N414 | 3.975036895   | -2.849781225 | -7.128128800  |
| N415 | 2.677834077   | -0.092569401 | -6.952315126  |
| N416 | 4.631067334   | 2.003186981  | -6.801574617  |
| N417 | 0.321065445   | -3.665992051 | -10.016229718 |
| N418 | -1.599724165  | -1.857101779 | -8.883162938  |
| N419 | 9.456189319   | -6.951720188 | -3.976711098  |
| N420 | 5.292521887   | -5.599917165 | -3.180216002  |
| N421 | 5.072772468   | -6.716800445 | -5.068449118  |
| N422 | 10.021217471  | -7.057020040 | -0.887108513  |
| O423 | -6.469977597  | -5.513566224 | 0.882343891   |
| O424 | -7.816453352  | -3.056579491 | 3.343388437   |
| O425 | -6.149938605  | -5.151236783 | 6.023859467   |
| O426 | -3.073216296  | -3.754620644 | 4.762398411   |
| O427 | -3.951395105  | -0.425938073 | 4.935071984   |
| O428 | -4.872856177  | -0.752962303 | 8.398400505   |
| O429 | -2.126329164  | -3.485626692 | 9.741689041   |
| O430 | 1.111704359   | -3.199574047 | 6.641062419   |
| O431 | 0.596632325   | 0.677188122  | 6.824513436   |
| O432 | -1.029701514  | 2.436455856  | 9.541920443   |
| O433 | -0.727637456  | 0.513280726  | 12.483228691  |
| O434 | 7.106842329   | -9.776459282 | 3.966443162   |
| O435 | 7.218592928   | -6.850466802 | 7.601471751   |
| O436 | 10.736144843  | -3.523337820 | 6.858531999   |
| O437 | -5.697659932  | -1.324923942 | -0.884703560  |
| O438 | -2.720570631  | -4.930931142 | -4.302661000  |
| O439 | -7.082839166  | 2.057923511  | -1.860021454  |
| O440 | -5.726678048  | 2.447656727  | -4.596566838  |
| O441 | -10.112298194 | 0.999414459  | 0.372200416   |
| O442 | -6.512331549  | 1.393778418  | 3.330533540   |
| O443 | -5.190183845  | 4.955811317  | 2.747000011   |
| O444 | -7.692459003  | 7.193786285  | 3.539556076   |
| O445 | 9.888805950   | 0.880225416  | 5.937158986   |
| O446 | 2.520174037   | 5.071099609  | 4.150078136   |
| O447 | 3.240540333   | 8.543152081  | -0.575870802  |
| O448 | 1.080700362   | 9.864783074  | -3.983329277  |
| O449 | -1.474810572  | 7.031917977  | -2.266938508  |
| O450 | -1.499944760  | 7.1843353981 | 1.472402840   |
| O451 | 1.748878340   | 5.845251129  | 1.453719339   |
| O452 | -0.140614630  | 11.686428447 | 1.653669623   |
| O453 | -3.213559296  | 13.417493221 | -0.689846777  |
| O454 | -3.531819104  | 10.729600473 | -2.639802953  |
| O455 | -6.192124861  | 13.529484536 | 1.780029143   |
| O456 | -5.482111334  | 6.414809949  | -2.751614783  |
| O457 | 3.537484307   | -4.925570780 | -8.013206414  |
| O458 | 1.351119960   | -1.250878568 | -8.419668353  |
| O459 | 3.408388030   | 3.238131557  | -8.267857025  |
| O460 | 7.017193408   | 4.256247068  | -8.279643672  |
| O461 | -3.150957454  | -3.433887482 | -9.438086606  |
| O462 | -0.002002619  | -7.037141397 | -5.753780475  |
| O463 | 1.964217882   | -6.090877871 | -6.220462175  |
| O464 | -2.519372914  | 1.588462557  | -9.211630075  |
| O465 | 10.746810193  | -5.020578845 | -1.563542905  |
| O466 | 13.159441371  | -6.216154790 | 0.634444637   |
| O467 | 0.913976514   | -6.163570907 | -0.851223729  |
| O468 | 0.070861192   | -7.151401202 | 0.990096302   |

|      |              |               |              |
|------|--------------|---------------|--------------|
| O469 | 6.186328081  | -10.734900771 | -1.602656226 |
| O470 | 3.960654335  | -10.884147046 | -1.983570365 |
| O471 | 5.618286587  | -5.567595293  | -0.097413505 |
| O472 | 5.340207135  | -7.128494955  | 1.491060521  |
| O473 | 3.287381897  | -5.960229800  | -1.209174678 |
| O474 | 8.932023558  | -5.938959198  | 3.046902808  |
| O475 | 7.041465165  | -4.101244268  | 1.903480428  |
| O476 | -4.061880861 | 4.338756421   | -3.519630243 |
| O477 | 8.575355226  | -10.082413864 | -0.390578547 |
| O478 | 7.843138029  | -8.163627270  | 1.813327150  |
| S479 | 3.627887041  | 5.080476884   | -2.115048926 |
| S480 | 2.664154039  | 1.898540829   | -3.371812791 |
| S481 | 2.786312360  | -3.250407416  | -2.753669195 |
| S482 | 3.291566827  | 2.052891311   | 0.225841818  |
| S483 | 0.954158089  | -0.931740140  | -1.583274907 |
| S484 | 5.061136768  | -0.700719825  | -4.724382330 |
| S485 | 3.947360518  | -3.230249605  | 0.618655171  |
| S486 | 6.002654822  | 1.967387421   | -2.126308766 |
| S487 | 6.417791909  | -2.884469638  | -2.020721025 |
| S488 | 6.270354386  | -0.365734386  | 0.909294711  |
| end  |              |               |              |

**Fe6-NH3**  
**2N2 dissociated**  
**35, S=1**

**Fe(139) -2.376**  
**Fe(140) -2.267**  
**Fe(141) -2.351**  
**Fe(142) 2.765**  
**Fe(143) 2.962**  
**Fe(144) 2.229**  
**Fe(145) 1.084**

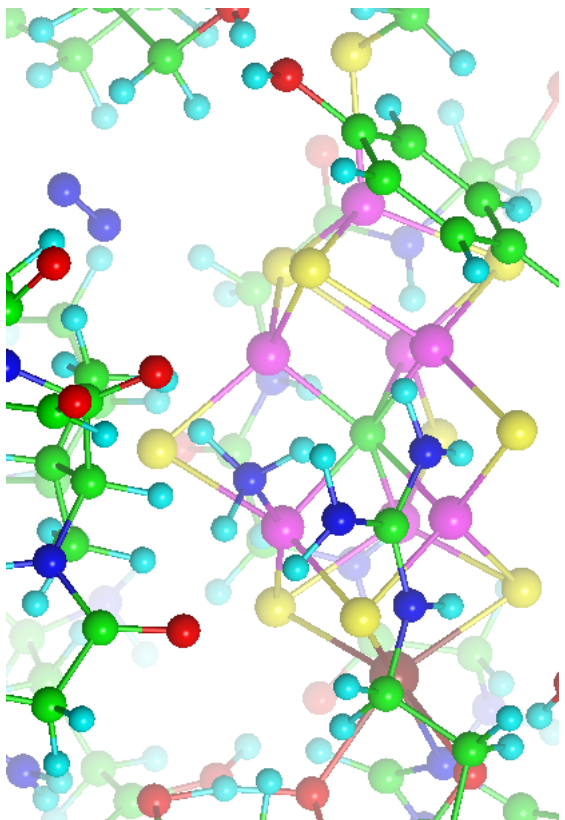

**bmexpprot6nh312n2xdta.car 2**

|     |               |               |              |
|-----|---------------|---------------|--------------|
| C1  | -1.803365135  | -6.553186548  | -6.604300517 |
| C2  | -1.075751098  | -6.537006731  | -7.953372881 |
| C3  | -3.989265574  | -6.759560514  | -5.492673753 |
| C4  | -3.656747139  | -7.752792160  | -4.383011266 |
| C5  | -2.595222808  | -9.865996353  | -3.756639327 |
| C6  | -1.485928143  | -9.365132241  | -2.827340220 |
| C7  | 0.349019529   | -7.795125011  | -2.470665462 |
| C8  | -0.301284900  | -6.842629283  | -1.461059227 |
| C9  | -2.105425871  | -5.229773482  | -1.081349336 |
| C10 | -2.789898572  | -6.010352439  | 0.048847939  |
| C11 | -4.051866658  | -7.957212236  | 0.736288966  |
| C12 | -3.106140640  | -8.651475186  | 1.726496990  |
| C13 | -1.195626100  | -10.159418681 | 2.002358092  |
| C14 | 0.075324255   | -9.549191388  | 2.611224884  |
| C15 | 1.966697096   | -8.003691131  | 2.276540798  |
| C16 | 1.808870813   | -6.568577237  | 2.783621936  |
| C17 | 0.292811030   | -4.634102260  | 2.984639496  |
| C18 | -0.626104706  | -4.674043885  | 4.222042214  |
| C19 | -0.177663099  | -3.708337410  | 1.839678585  |
| C20 | -0.571240359  | -2.327179614  | 2.372900092  |
| C21 | 0.916227957   | -3.627148243  | 0.768915629  |
| C22 | -2.870217716  | -5.091818316  | 5.130809276  |
| C23 | -2.656142996  | -6.274458747  | 6.092819762  |
| C24 | -4.315049209  | -5.006976232  | 4.581413093  |
| C25 | -5.351092802  | -5.149257563  | 5.702755898  |
| C26 | -4.521148153  | -3.682552351  | 3.833496651  |
| C27 | -2.374116689  | -8.663974709  | 6.394983741  |
| C28 | -1.264934822  | -8.514297361  | 7.416030944  |
| C29 | 11.399521304  | -7.286169969  | 0.630968062  |
| C30 | 11.078134534  | -5.961442048  | 1.318650416  |
| C31 | 9.494680751   | -4.923169597  | 2.936774186  |
| C32 | 9.889088951   | -4.953084375  | 4.424496165  |
| C33 | 7.968701537   | -4.977257465  | 2.763840160  |
| C34 | 7.260533704   | -3.788971465  | 3.408405048  |
| C35 | 5.792996724   | -3.700023343  | 2.989078301  |
| C36 | 4.156850518   | -2.287861422  | 4.270856602  |
| C37 | 10.752825675  | -3.630410977  | 6.300189483  |
| C38 | 9.841340025   | -2.726989803  | 7.101313443  |
| C39 | -1.490948328  | -2.022441787  | -5.616228719 |
| C40 | -2.865089285  | -1.770443553  | -4.964417659 |
| C41 | -0.368040006  | -1.581476861  | -4.655982912 |
| C42 | 1.034287883   | -2.130791524  | -5.002904356 |
| C43 | 1.864796569   | -1.287193826  | -5.968306636 |
| C44 | -4.559265704  | 0.028806654   | -4.718665848 |
| C45 | -5.848375353  | -0.792462427  | -4.651395761 |
| C46 | -4.767291221  | 1.399577749   | -5.377164198 |
| C47 | -7.179327042  | -2.593906247  | -5.633110298 |
| C48 | -7.213549546  | -3.572616432  | -4.454096224 |
| C49 | -6.006750608  | -4.601590395  | -2.590665365 |
| C50 | -5.917756350  | -3.880801085  | -1.242696405 |
| C51 | -5.796310614  | -1.768095737  | -0.009964012 |
| C52 | -7.139841959  | -1.717346484  | 0.733158311  |
| C53 | -5.384674888  | -0.307347013  | -0.261719971 |
| C54 | -4.061077208  | -0.155435715  | -0.934973069 |
| C55 | -2.972919584  | -0.994173192  | -1.079863676 |
| C56 | -2.438826242  | 0.824094310   | -2.093883005 |
| C57 | -9.547405368  | -1.362020665  | 0.421649217  |
| C58 | -9.875927004  | -2.361209949  | 1.529548510  |
| C59 | -10.540500063 | -1.527842051  | -0.755990755 |

|       |               |              |              |
|-------|---------------|--------------|--------------|
| C60   | -11.898204490 | -0.913090345 | -0.590139406 |
| C61   | -12.756643492 | -0.896671218 | 0.492035183  |
| C62   | -13.664196295 | 0.162760974  | -1.230527568 |
| C63   | 4.568437136   | 1.451196386  | 8.779687124  |
| C64   | 6.082051074   | 1.350222474  | 8.830553115  |
| C65   | 4.122700135   | 0.777850874  | 7.459133681  |
| C66   | 2.622128054   | 0.749822815  | 7.286512864  |
| C67   | 1.848019849   | -0.311322747 | 7.793648242  |
| C68   | 1.953448442   | 1.787705056  | 6.613925898  |
| C69   | 0.458084254   | -0.337459925 | 7.637523517  |
| C70   | 0.566003154   | 1.781835648  | 6.462067360  |
| C71   | -0.180611743  | 0.715507169  | 6.974303443  |
| C72   | -0.769895912  | 6.655756262  | 5.734572771  |
| C73   | -2.230343437  | 7.069308911  | 5.466610663  |
| C74   | -0.405656319  | 5.446051658  | 4.878879119  |
| C75   | -3.724469367  | 8.815507878  | 4.553399896  |
| C76   | -4.423027189  | 8.248315812  | 3.315542063  |
| C77   | -4.215638586  | 6.631951463  | 1.428197846  |
| C78   | -4.597216557  | 5.187971082  | 1.846466865  |
| C79   | -3.136463777  | 6.672441436  | 0.325030577  |
| C80   | -3.357457775  | 5.878836300  | -0.968650167 |
| C81   | -4.364475807  | 6.467563395  | -1.971860990 |
| C82   | -6.839944768  | 6.617425785  | -1.764504948 |
| C83   | -4.018442319  | 3.149901102  | 3.068796330  |
| C84   | -5.167257048  | 3.070405488  | 4.078428126  |
| C85   | -2.802320011  | 2.431185804  | 3.689283022  |
| C86   | -5.966985333  | 3.961822760  | 6.206955097  |
| C87   | -7.265013915  | 4.745773752  | 6.259232218  |
| C88   | -8.826893147  | 6.159096496  | 5.037788090  |
| C89   | -10.226825274 | 5.509606587  | 4.913128858  |
| C90   | -8.659735559  | 7.284760005  | 4.012949340  |
| C91   | -8.777424540  | 6.828468699  | 2.563870696  |
| C92   | -11.517177815 | 3.529978587  | 4.281489977  |
| C93   | -12.420803556 | 3.380992527  | 5.496729841  |
| C94   | -11.232559265 | 2.138156450  | 3.652414772  |
| C95   | -10.449009662 | 2.251014806  | 2.364562942  |
| C96   | -11.111468374 | 2.434176049  | 1.140640654  |
| C97   | -9.042846246  | 2.251842416  | 2.360490728  |
| C98   | -10.400601223 | 2.647711491  | -0.043499711 |
| C99   | -8.314750643  | 2.491442158  | 1.191334423  |
| C100  | -9.005902456  | 2.697497456  | -0.000446221 |
| C101  | 7.371052522   | 6.084227732  | -4.781218765 |
| C102  | 6.119618450   | 5.379937296  | -5.280509484 |
| C103  | 3.800810376   | 4.720386710  | -4.668313268 |
| C104  | 2.623086130   | 5.701183311  | -4.686655160 |
| C105  | 1.196746618   | 7.136986982  | -3.298655766 |
| C106  | 1.390782428   | 8.215389541  | -2.238693068 |
| C107  | 2.449956544   | 8.985075727  | -0.196597838 |
| C108  | 2.849846586   | 10.383322411 | -0.623275156 |
| C109  | 2.375095140   | 4.184123458  | -9.004131881 |
| C110  | 0.843858335   | 4.211514943  | -8.952766739 |
| C111  | 2.907471539   | 2.963194731  | -8.213417946 |
| C112  | 4.383084692   | 2.681269138  | -8.550542969 |
| C113  | 4.969436862   | 1.672827314  | -7.588054133 |
| C114  | -1.170672671  | 4.853441845  | -7.733093292 |
| C115  | -1.596957140  | 6.211865509  | -7.214418872 |
| C116  | -1.841987623  | 3.652385756  | -7.024064812 |
| C117  | -1.174245365  | 3.379598144  | -5.706573213 |
| C118  | -1.528939397  | 4.108782205  | -4.560228670 |
| C119  | -0.064096580  | 2.519542525  | -5.653487109 |
| C120  | -0.746779776  | 4.024121885  | -3.405768724 |
| C121  | 0.714488455   | 2.438160710  | -4.498528107 |
| C122  | 0.389452612   | 3.213617287  | -3.384121531 |
| C123  | 10.837015663  | 2.860846382  | -0.799766965 |
| C124  | 11.498186615  | 2.463424000  | 0.528058103  |
| C125  | 9.991736553   | 1.694896367  | -1.338254349 |
| C126  | 9.110569168   | 1.986330275  | -2.515792811 |
| C127  | 9.485750551   | 2.436052364  | -3.766285814 |
| C128  | 7.339557950   | 1.891549315  | -3.799731986 |
| C129  | 12.822219943  | 0.887470024  | 1.810967435  |
| C130  | 13.689784190  | 1.964636475  | 2.422965765  |
| C131  | 5.175159531   | -3.355346869 | -2.809548386 |
| C132  | 6.224627841   | -3.148714052 | -1.717753653 |
| C133  | 7.220558494   | -1.985919091 | -1.997574450 |
| C134  | 8.254057796   | -2.409349513 | -3.071103615 |
| C135  | 9.444093306   | -1.460304233 | -3.230921758 |
| C136  | 10.561148374  | -1.992085302 | -4.157364359 |
| C137  | 7.987768504   | -1.648136143 | -0.708107686 |
| C138  | 3.445251213   | 2.550042848  | 0.599229328  |
| Fe139 | 4.788194077   | 3.049613079  | -0.821348704 |
| Fe140 | 1.544992732   | 2.571353643  | 0.400260909  |
| Fe141 | 3.179122774   | 2.916798191  | 2.510079109  |

|       |              |               |               |
|-------|--------------|---------------|---------------|
| Fe142 | 3.172048195  | 4.554199062   | 0.469853191   |
| Fe143 | 1.088681257  | 4.469734299   | 2.194000941   |
| Fe144 | 5.128727150  | 1.670308269   | 1.336396615   |
| Fe145 | 3.401943555  | 0.761230080   | -0.298795426  |
| H146  | 0.838192565  | -6.502002894  | -7.247406042  |
| H147  | 0.275444284  | -5.029458196  | -7.672086114  |
| H148  | -3.581131656 | -6.889021965  | -7.579292253  |
| H149  | -1.685919910 | -5.975761041  | -8.679511838  |
| H150  | -1.059569561 | -7.580386685  | -8.312479665  |
| H151  | -3.942735990 | -5.758435894  | -5.039526161  |
| H152  | -2.813066312 | -9.040892378  | -5.731179248  |
| H153  | -5.027041009 | -6.936657071  | -5.807073661  |
| H154  | -2.238242218 | -10.761690808 | -4.281394548  |
| H155  | -0.809094466 | -8.031210295  | -4.251731717  |
| H156  | -3.435721535 | -10.162389983 | -3.114567735  |
| H157  | -1.486417977 | -4.457012368  | -0.611306991  |
| H158  | -1.522056548 | -6.113480363  | -2.943697305  |
| H159  | 1.055875739  | -7.236360472  | -3.099399248  |
| H160  | -4.711978902 | -7.309446553  | 1.327333646   |
| H161  | -3.487195466 | -7.430705420  | -1.277706980  |
| H162  | 0.911338209  | -8.544670934  | -1.900935485  |
| H163  | -2.859953433 | -4.727673640  | -1.700924951  |
| H164  | -1.918006172 | -9.315707032  | 0.172821616   |
| H165  | -4.663779187 | -8.724869437  | 0.242094134   |
| H166  | 1.094941855  | -4.606535384  | 0.304975399   |
| H167  | 0.641011899  | -2.916161492  | -0.023352562  |
| H168  | 1.870413843  | -3.299064076  | 1.211629631   |
| H169  | -1.075544881 | -4.164614991  | 1.396286748   |
| H170  | -0.887170461 | -11.016416492 | 1.385094268   |
| H171  | -3.825851057 | -3.568189799  | 2.990358643   |
| H172  | -2.645226550 | -7.659908866  | 4.535998245   |
| H173  | -5.296129246 | -6.124740278  | 6.208566851   |
| H174  | 0.272718281  | -1.828322778  | 2.873811161   |
| H175  | -1.400472985 | -2.388571808  | 3.092745426   |
| H176  | 4.166293988  | 0.857560001   | 9.624395571   |
| H177  | -5.541553627 | -3.618553017  | 3.430247392   |
| H178  | -6.363490535 | -5.039394967  | 5.286502722   |
| H179  | -4.374775492 | -2.832835000  | 4.520424984   |
| H180  | -5.210388411 | -4.364337187  | 6.462620917   |
| H181  | -4.456412996 | -5.841604154  | 3.870846842   |
| H182  | -2.673852377 | -4.201767825  | 5.747539938   |
| H183  | -2.231443160 | -5.311649150  | 3.084888284   |
| H184  | -0.901123500 | -1.685941213  | 1.543244926   |
| H185  | -1.898109240 | 2.678638847   | 3.113735725   |
| H186  | -2.987864392 | 1.350807888   | 3.598091864   |
| H187  | -2.300088299 | 2.011145344   | 5.546749497   |
| H188  | -1.948935049 | -0.071081900  | 7.128828400   |
| H189  | 0.065786000  | 2.585072931   | 5.921386572   |
| H190  | 2.530821517  | 2.604606813   | 6.173088778   |
| H191  | 2.340057643  | -1.137999392  | 8.312865889   |
| H192  | -0.045934342 | -6.465718431  | 1.927920815   |
| H193  | 2.697835175  | -7.988238012  | 1.454253904   |
| H194  | 2.395039006  | -8.591152799  | 3.099013873   |
| H195  | 0.371761725  | -8.374156790  | 0.923036080   |
| H196  | -1.789431963 | -10.533844314 | 2.844842898   |
| H197  | -0.124056179 | -1.180655691  | 8.017463339   |
| H198  | 1.231372183  | -4.221841630  | 3.375528654   |
| H199  | -3.312285482 | -8.905452133  | 6.920780326   |
| H200  | -2.108708013 | -9.524321180  | 5.760398612   |
| H201  | -0.425201847 | -7.848276912  | 7.108353660   |
| H202  | 11.788173641 | -3.265230439  | 6.381416088   |
| H203  | 3.789395313  | -0.740865054  | -6.385931817  |
| H204  | 5.436472943  | -1.440401964  | -3.005689635  |
| H205  | 4.452019449  | 2.267143138   | -9.566164983  |
| H206  | 4.963183093  | 3.614807707   | -8.518106352  |
| H207  | 2.308029516  | 2.069420906   | -8.448139372  |
| H208  | -0.861561651 | 7.030606904   | -7.398667866  |
| H209  | 2.597287867  | 4.011026864   | -10.066077856 |
| H210  | -0.345662669 | -0.481409287  | -4.614031783  |
| H211  | 0.940641402  | -3.135151414  | -5.454971991  |
| H212  | 0.860234155  | 5.134104377   | -7.089271766  |
| H213  | -1.535145839 | 4.851717517   | -8.779751422  |
| H214  | 2.899729451  | 5.660150251   | -7.640506205  |
| H215  | 3.627634970  | -1.728607752  | -4.938270483  |
| H216  | 2.779462152  | 3.154430576   | -7.136321830  |
| H217  | 3.930429082  | 5.520920482   | -8.916479345  |
| H218  | -1.733259047 | -1.894374887  | -7.663845097  |
| H219  | -0.631632724 | -1.909094132  | -3.640519288  |
| H220  | 5.732999939  | 3.173988450   | -6.576244413  |
| H221  | 1.604379771  | -2.276270826  | -4.073131836  |
| H222  | -5.081697785 | -2.266834093  | 0.659348457   |
| H223  | -2.867699157 | -2.012730130  | -0.712870451  |

|      |               |              |              |
|------|---------------|--------------|--------------|
| H224 | -6.927853346  | -5.200437203 | -2.568283060 |
| H225 | -5.194149191  | -3.260009836 | -4.041962131 |
| H226 | -8.080660324  | -1.747851724 | -1.089877542 |
| H227 | -12.668802949 | -1.280710390 | 1.501515541  |
| H228 | -9.459072693  | -3.381240405 | 1.345416252  |
| H229 | -10.622687756 | -2.602079659 | -0.998780307 |
| H230 | -9.603366521  | -0.342103879 | 0.833715915  |
| H231 | -14.397858427 | 0.719305582  | -1.809324183 |
| H232 | -5.383013900  | 0.200162282  | 0.718112731  |
| H233 | -6.163994464  | 0.181951569  | -0.869926339 |
| H234 | -14.697041188 | -0.003610604 | 0.623660019  |
| H235 | -10.087790666 | -1.048871691 | -1.638153086 |
| H236 | -5.891696552  | -2.010508403 | -2.143763769 |
| H237 | -5.167343717  | -5.311617568 | -2.644855301 |
| H238 | -8.126646629  | -2.037893498 | -5.595576094 |
| H239 | -1.900368556  | 1.603444439  | -2.625909117 |
| H240 | -7.171512419  | -3.175702771 | -6.564423680 |
| H241 | 4.281694752   | 3.237194139  | 9.747144601  |
| H242 | 3.204715157   | 2.962205639  | 8.546788260  |
| H243 | -2.762189901  | 4.889625240  | 2.805956734  |
| H244 | -4.350951155  | 2.572906809  | 2.197099431  |
| H245 | -4.430152866  | 4.750185012  | 4.990027426  |
| H246 | -4.302660308  | 1.837620055  | -1.671874056 |
| H247 | -5.820290920  | 2.720810103  | -3.025079049 |
| H248 | -6.036113113  | 2.884468772  | -5.243339165 |
| H249 | -6.649753069  | 2.781652449  | -1.676891476 |
| H250 | -3.805799548  | 1.939526985  | -5.345252131 |
| H251 | -5.066145780  | 1.263455263  | -6.429360493 |
| H252 | -7.714832192  | 7.814615300  | 4.196357309  |
| H253 | -9.478925448  | 7.999923051  | 4.187943452  |
| H254 | -7.051622920  | 7.863784751  | 2.075796745  |
| H255 | -7.867368233  | 7.002292972  | 0.773114074  |
| H256 | -7.738558976  | 8.453821958  | -1.905748197 |
| H257 | -4.032318271  | 6.259115987  | -3.001396236 |
| H258 | -10.931122991 | 2.783264939  | -0.989362620 |
| H259 | -8.484224723  | 2.063621652  | 3.281125173  |
| H260 | -7.997474356  | 5.008608024  | -1.197576487 |
| H261 | -2.195556123  | 6.312341835  | 0.769556632  |
| H262 | -2.737311460  | 7.191098807  | 2.857284861  |
| H263 | -3.616652210  | 4.827610545  | -0.762343791 |
| H264 | -5.315664596  | -1.794801892 | -6.348527873 |
| H265 | -3.642396383  | 9.902320432  | 4.424533365  |
| H266 | -2.894774967  | -0.163767703 | -6.132862135 |
| H267 | -2.969024267  | 7.731544877  | 0.069039638  |
| H268 | -7.225989729  | 2.546287332  | 1.223337023  |
| H269 | -4.401609301  | 8.628522807  | 5.399073257  |
| H270 | -6.120210584  | 8.398894946  | -2.509530260 |
| H271 | -8.874398390  | 6.417131078  | -1.701156520 |
| H272 | -0.420761351  | -1.042864189 | -7.072240765 |
| H273 | -1.423479396  | -3.122647359 | -5.723607318 |
| H274 | -12.203544122 | 2.412001580  | 1.106494902  |
| H275 | -4.280072114  | 0.187670864  | -3.668189815 |
| H276 | -5.148910016  | 7.102795558  | 1.094993161  |
| H277 | -4.396871622  | 7.559559244  | -1.858369503 |
| H278 | -2.382521027  | 5.852137190  | -1.478895765 |
| H279 | -5.783941339  | 4.878475153  | -1.831999068 |
| H280 | -6.213955175  | 2.900265143  | 6.362031832  |
| H281 | -7.090263767  | 5.145527996  | 4.260427375  |
| H282 | -8.851088049  | 6.628861028  | 6.033666324  |
| H283 | -5.347229414  | 4.295906087  | 7.049803407  |
| H284 | -9.391148164  | 3.739031604  | 4.372550929  |
| H285 | 7.089317573   | 6.926894478  | -4.131516933 |
| H286 | 7.888419512   | 5.341727635  | -4.138632188 |
| H287 | 10.168568172  | 3.697222928  | -0.547764252 |
| H288 | 9.117895714   | 6.774561345  | -5.570694653 |
| H289 | 8.270849947   | 5.806198137  | -6.583865578 |
| H290 | 0.631884460   | 5.169092334  | 5.102934267  |
| H291 | -1.260405685  | 5.634473213  | 7.435284729  |
| H292 | -1.587808909  | 8.812986088  | 4.587939039  |
| H293 | -1.069747793  | 4.605471192  | 5.124746276  |
| H294 | -0.734309800  | 7.152886799  | 7.727565296  |
| H295 | 3.222871758   | 8.616077007  | 0.494549266  |
| H296 | -0.098111914  | 7.490036888  | 5.477122815  |
| H297 | 7.594218676   | -5.926266220 | 3.181952113  |
| H298 | 9.877708260   | -4.007346661 | 2.469152349  |
| H299 | 2.944623966   | 7.212291527  | -1.275656982 |
| H300 | 2.959166155   | -0.906029153 | 5.191421092  |
| H301 | 1.037171352   | 7.638979087  | -4.260891545 |
| H302 | 1.577099170   | 1.769758198  | -4.459427530 |
| H303 | 0.255032809   | 6.619701103  | -3.046299486 |
| H304 | 5.218771288   | -4.549122196 | 3.379481004  |
| H305 | 2.692791826   | 5.713889907  | -2.649191994 |

|       |               |              |              |
|-------|---------------|--------------|--------------|
| H306  | 5.709578229   | -3.731416762 | 1.890190320  |
| H307  | 7.769325451   | -4.984688915 | 1.680570565  |
| H308  | 7.755951690   | -2.854222044 | 3.104520123  |
| H309  | 7.314093711   | -3.843588075 | 4.507325572  |
| H310  | -1.766428087  | 2.781262517  | -7.691025537 |
| H311  | 9.743081961   | -6.995645877 | 2.392329977  |
| H312  | 10.958754950  | -7.209894070 | -0.375438829 |
| H313  | 0.990611373   | 3.151134056  | -2.479914465 |
| H314  | 11.490323684  | -8.813465822 | 2.008996607  |
| H315  | 10.664629299  | -9.207336432 | 0.648991710  |
| H316  | 5.726892467   | -1.600091919 | 3.193762840  |
| H317  | -1.008374802  | 4.590416683  | -2.510065647 |
| H318  | 0.198340688   | 1.919698956  | -6.527445270 |
| H319  | 12.523755807  | -1.661618162 | -0.726629965 |
| H320  | 10.664756041  | 0.865254154  | -1.621007667 |
| H321  | 10.297979446  | -2.194390307 | 0.406558938  |
| H322  | 12.561326408  | -1.432016868 | -2.263327466 |
| H323  | 3.381076389   | 10.442141891 | -1.604121385 |
| H324  | 7.984472494   | -0.435945816 | 1.607649479  |
| H325  | 6.759247581   | -4.090173484 | -1.544664360 |
| H326  | 5.193284304   | 5.798658824  | -3.502689835 |
| H327  | 8.625583952   | -3.402753592 | -2.779458529 |
| H328  | 8.304418904   | 2.575725234  | -5.546246102 |
| H329  | 6.346228657   | 1.711155830  | -4.186770947 |
| H330  | 12.493727088  | -7.321024045 | 0.494797313  |
| H331  | 4.301020495   | -0.203838093 | 4.328123254  |
| H332  | 9.664070277   | -1.025993207 | 3.168239666  |
| H333  | 7.616060518   | 0.421668710  | 2.846649197  |
| H334  | 10.423462506  | -2.937586580 | 4.292515286  |
| H335  | 3.419744302   | -4.243290792 | 4.195748523  |
| H336  | 9.098590454   | -0.502589093 | -3.650307697 |
| H337  | 9.893127257   | -1.238524675 | -2.252385251 |
| H338  | 7.729798847   | -2.526038737 | -4.030800696 |
| H339  | 3.659586335   | 3.962658193  | -3.882395645 |
| H340  | -2.398680604  | 4.772102184  | -4.592312148 |
| H341  | -2.907016149  | 3.903575190  | -6.900318764 |
| H342  | 5.648730243   | -2.913529061 | -0.805513702 |
| H343  | 10.871965953  | -1.661137359 | 2.418279246  |
| H344  | 11.429366096  | -3.146191137 | 0.862042770  |
| H345  | 2.593160150   | -3.163659504 | 5.244397675  |
| H346  | 10.448247693  | 2.760669824  | -4.146991190 |
| H347  | 9.365755008   | 1.309329062  | -0.524487405 |
| H348  | 3.845972639   | 4.228303963  | -5.641962551 |
| H349  | 1.500442803   | 9.038773825  | 0.358415186  |
| H350  | 4.520033948   | -0.247870193 | 7.454152105  |
| H351  | 4.584882116   | 1.319905401  | 6.618287244  |
| H352  | 12.319482041  | 4.140336603  | -1.403565425 |
| H353  | 12.498903728  | 2.625009228  | -1.997049458 |
| H354  | 13.473063651  | 0.024311457  | 1.599077090  |
| H355  | 12.310758405  | 0.689095621  | -0.249776891 |
| H356  | 14.131509390  | 2.681388166  | 1.689100153  |
| H357  | 12.065733580  | 0.558487642  | 2.543409512  |
| H358  | 6.609603068   | 2.117242753  | 8.212958477  |
| H359  | -11.899209084 | 3.429803420  | 6.481979942  |
| H360  | 10.710804559  | -4.630934914 | 6.765992469  |
| H361  | 8.801766244   | -2.632606475 | 6.705647062  |
| H362  | -12.054200611 | 4.149786247  | 3.544183703  |
| H363  | -10.690830929 | 1.516733875  | 4.383459588  |
| H364  | -12.206192972 | 1.660889846  | 3.470116824  |
| H365  | 2.651855779   | -0.155005337 | 2.089780361  |
| H366  | -8.843240027  | 2.865385661  | -1.931180922 |
| H367  | 2.573881633   | -1.391613816 | 0.978547981  |
| H368  | 1.399498536   | -0.206794115 | 0.982641430  |
| Mo369 | 6.184602010   | 0.765461686  | -1.016436976 |
| N370  | 2.396742843   | -0.397688240 | 1.126635614  |
| N371  | -1.597212502  | 2.235862259  | 0.402423984  |
| N372  | -2.453586184  | 1.714762528  | 0.889479068  |
| N373  | 0.279671385   | -6.013398370 | -7.952409082 |
| N374  | -3.135754540  | -6.843819818 | -6.666445987 |
| N375  | -3.029472581  | -8.896152090 | -4.747821566 |
| N376  | -0.627423530  | -8.445486697 | -3.334699042 |
| N377  | -1.301326568  | -6.072940398 | -1.950753433 |
| N378  | -3.375015272  | -7.182227407 | -0.291029503 |
| N379  | -2.030455244  | -9.285609458 | 1.190616015  |
| N380  | 0.745825855   | -8.654684436 | 1.833786551  |
| N381  | 0.622224026   | -5.974428450 | 2.517055350  |
| N382  | -1.903235776  | -5.096903949 | 4.030845727  |
| N383  | -2.494482426  | -7.501465186 | 5.534992223  |
| N384  | 10.829619777  | -8.453097391 | 1.317084343  |
| N385  | 10.099685818  | -6.046076780 | 2.241347544  |
| N386  | 5.209390184   | -2.442346426 | 3.459806822  |
| N387  | 3.420417915   | -3.342205199 | 4.682825127  |

|      |               |              |              |
|------|---------------|--------------|--------------|
| N388 | 3.834712309   | -1.055074894 | 4.698792882  |
| N389 | 10.347201902  | -3.772818455 | 4.915520744  |
| N390 | -1.406980102  | -1.305191946 | -6.895246880 |
| N391 | 3.193961387   | -1.278608189 | -5.750237313 |
| N392 | -3.468994575  | -0.636561057 | -5.416160240 |
| N393 | -6.054144679  | -1.676738303 | -5.658077606 |
| N394 | -6.050088071  | -3.764991118 | -3.774492522 |
| N395 | -5.885774606  | -2.518892143 | -1.257395657 |
| N396 | -3.706084209  | 1.001895799  | -1.601815518 |
| N397 | -1.972595580  | -0.381336134 | -1.799242757 |
| N398 | -8.219504583  | -1.651176846 | -0.086999758 |
| N399 | -12.477948941 | -0.250175967 | -1.660133236 |
| N400 | -13.872080364 | -0.205974856 | 0.065325015  |
| N401 | 4.192892110   | 2.867047699  | 8.797600607  |
| N402 | -0.556780762  | 6.324366893  | 7.152909829  |
| N403 | -2.410214988  | 8.276516369  | 4.852802715  |
| N404 | -3.700337362  | 7.395606086  | 2.562975802  |
| N405 | -5.712034042  | 5.916556696  | -1.805686932 |
| N406 | -6.860555491  | 7.949674210  | -1.981081016 |
| N407 | -7.993471971  | 6.014128735  | -1.393107827 |
| N408 | -3.714748942  | 4.517089402  | 2.639977064  |
| N409 | -5.219311150  | 4.098035113  | 4.972350520  |
| N410 | -7.716695297  | 5.227395430  | 5.061258697  |
| N411 | -7.897738581  | 7.411902689  | 1.705641194  |
| N412 | -10.265842154 | 4.179197686  | 4.648500829  |
| N413 | 8.174679291   | 6.568061428  | -5.906049846 |
| N414 | 5.061434401   | 5.416847434  | -4.445299516 |
| N415 | 2.269443020   | 6.173870370  | -3.471278848 |
| N416 | 2.369482076   | 8.059097907  | -1.312767397 |
| N417 | 2.943454769   | 5.491813002  | -8.652700719 |
| N418 | 0.274325688   | 4.779345598  | -7.851715360 |
| N419 | 11.802354750  | 3.350215405  | -1.799292030 |
| N420 | 7.754465023   | 1.655515750  | -2.556549475 |
| N421 | 8.355007350   | 2.372211913  | -4.552415316 |
| N422 | 12.230364894  | 1.316582398  | 0.554338552  |
| O423 | -1.224984850  | -6.368799513 | -5.519432809 |
| O424 | -3.966746739  | -7.500937074 | -3.205727707 |
| O425 | -1.387816940  | -9.814341292 | -1.672632455 |
| O426 | 0.052393052   | -6.797707923 | -0.268462337 |
| O427 | -2.791849126  | -5.584601490 | 1.214788781  |
| O428 | -3.361070839  | -8.663375604 | 2.943429197  |
| O429 | 0.465514107   | -9.916232156 | 3.728208962  |
| O430 | 2.757900651   | -6.024887352 | 3.382224663  |
| O431 | -0.188697145  | -4.326902525 | 5.331483174  |
| O432 | -2.633917708  | -6.111502751 | 7.325134234  |
| O433 | -1.238716188  | -9.135812543 | 8.468720895  |
| O434 | 11.678936801  | -4.920153020 | 0.984242794  |
| O435 | 9.767038465   | -5.991100099 | 5.098474073  |
| O436 | 10.189958664  | -2.142495494 | 8.114813926  |
| O437 | -3.370904204  | -2.535423424 | -4.122306581 |
| O438 | 1.350895703   | -0.668267416 | -6.928256141 |
| O439 | -6.643176806  | -0.653184295 | -3.705841621 |
| O440 | -5.785626761  | 2.136576887  | -4.672528965 |
| O441 | -8.276267243  | -4.150408748 | -4.182042574 |
| O442 | -5.888155280  | -4.540741851 | -0.196302711 |
| O443 | -7.224779623  | -1.645944939 | 1.964366049  |
| O444 | -10.579888828 | -2.120602769 | 2.496572919  |
| O445 | 6.698046762   | 0.501408570  | 9.458665561  |
| O446 | -1.547025865  | 0.746645724  | 6.782879238  |
| O447 | -3.189463343  | 6.350522659  | 5.797073048  |
| O448 | -5.593565625  | 8.600282359  | 3.066251792  |
| O449 | -5.674266234  | 4.697318824  | 1.473340426  |
| O450 | -5.936763330  | 2.100754709  | 4.095561917  |
| O451 | -2.621994444  | 2.798599322  | 5.061838212  |
| O452 | -7.871379287  | 4.903512176  | 7.326742965  |
| O453 | -11.247532171 | 6.186067436  | 5.107586874  |
| O454 | -9.653513749  | 6.031701239  | 2.196781213  |
| O455 | -13.623979384 | 3.186370655  | 5.415248682  |
| O456 | -8.262356831  | 2.995821287  | -1.156956691 |
| O457 | 6.120511849   | 4.777969976  | -6.382629223 |
| O458 | 2.068247014   | 6.045183838  | -5.751377286 |
| O459 | 0.617464324   | 9.188491668  | -2.224165543 |
| O460 | 2.648500017   | 11.376909368 | 0.056275563  |
| O461 | 0.159486139   | 3.722517658  | -9.868546096 |
| O462 | 4.811329174   | 0.461975783  | -7.698065440 |
| O463 | 5.660503249   | 2.170258052  | -6.540762784 |
| O464 | -2.677833294  | 6.442720379  | -6.690419094 |
| O465 | 11.407287000  | 3.180306218  | 1.543077651  |
| O466 | 13.966587113  | 2.019846799  | 3.613133346  |
| O467 | 4.756802555   | -2.237244235 | -3.401548787 |
| O468 | 4.707686118   | -4.464003044 | -3.076495324 |
| O469 | 11.771064676  | -1.793012370 | -3.783091273 |



|      |              |              |              |
|------|--------------|--------------|--------------|
| O470 | 10.211359640 | -2.559908438 | -5.230280049 |
| O471 | 7.902276795  | -0.416686603 | -0.278827961 |
| O472 | 8.673166851  | -2.521232100 | -0.139267481 |
| O473 | 6.458161367  | -0.850468231 | -2.414561480 |
| O474 | 10.547530397 | -1.433698641 | 3.333371715  |
| O475 | 7.941108641  | -0.464477655 | 2.597436799  |
| O476 | -5.806489751 | 3.066797017  | -2.095349198 |
| O477 | 13.097080935 | -1.279918157 | -1.428079627 |
| O478 | 11.228613651 | -2.181332823 | 0.758762099  |
| S479 | -0.557850998 | 5.809230355  | 3.067639183  |
| S480 | 0.975065767  | 4.654184844  | -0.106864686 |
| S481 | 4.280926952  | 1.425992371  | -2.291945172 |
| S482 | 0.996644458  | 2.280116946  | 2.611975649  |
| S483 | 1.278253447  | 0.996606966  | -1.097720666 |
| S484 | 4.527284150  | 5.246966118  | -1.148261986 |
| S485 | 5.054372950  | -0.447463667 | 0.607640266  |
| S486 | 3.239472727  | 5.133724889  | 2.672070033  |
| S487 | 6.747261530  | 2.716236604  | 0.228818939  |
| S488 | 4.861009300  | 1.811082659  | 3.498490542  |
| end  |              |              |              |

**Fe6-NH3  
2N2 TS  
35, S=1**

**Fe( 139) -2.461  
Fe( 140) -1.625  
Fe( 141) -2.653  
Fe( 142) 2.623  
Fe( 143) 2.935  
Fe( 144) 1.965  
Fe( 145) 1.309**

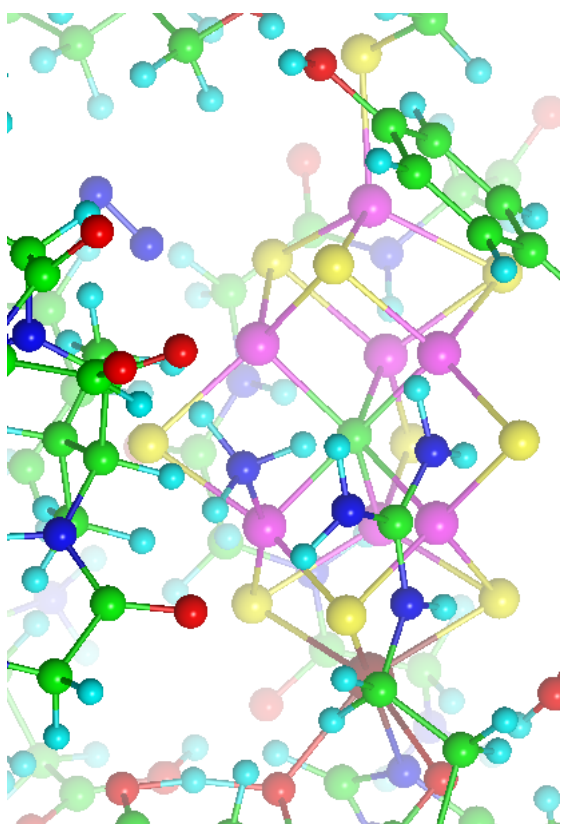

**bmexpprot6nh312n2xdtd.car\_1**

|     |               |               |              |
|-----|---------------|---------------|--------------|
| C1  | -1.815981451  | -6.564503853  | -6.620832421 |
| C2  | -1.089341274  | -6.546559609  | -7.970582111 |
| C3  | -3.994096667  | -6.762680417  | -5.500105888 |
| C4  | -3.654001328  | -7.745430240  | -4.383713467 |
| C5  | -2.597335945  | -9.857288817  | -3.747064611 |
| C6  | -1.483523926  | -9.354770210  | -2.823331878 |
| C7  | 0.350348884   | -7.784362118  | -2.470583983 |
| C8  | -0.301244048  | -6.835021173  | -1.459135981 |
| C9  | -2.108188616  | -5.218457439  | -1.087566187 |
| C10 | -2.793683390  | -5.996126664  | 0.043796289  |
| C11 | -4.049506247  | -7.946424910  | 0.731911175  |
| C12 | -3.107948294  | -8.638152401  | 1.729184804  |
| C13 | -1.194921252  | -10.144164091 | 2.012062870  |
| C14 | 0.077053433   | -9.535923528  | 2.620460774  |
| C15 | 1.985598640   | -8.017717052  | 2.276574486  |
| C16 | 1.821864162   | -6.584987872  | 2.788162901  |
| C17 | 0.297740459   | -4.655551920  | 2.988578005  |
| C18 | -0.620908153  | -4.693453747  | 4.226696214  |
| C19 | -0.177139788  | -3.742637375  | 1.840347690  |
| C20 | -0.596595876  | -2.361804034  | 2.357748617  |
| C21 | 0.919406684   | -3.643072707  | 0.774124843  |
| C22 | -2.867587410  | -5.098418866  | 5.135265009  |
| C23 | -2.661818420  | -6.279815370  | 6.101433030  |
| C24 | -4.310691456  | -5.007183570  | 4.583339822  |
| C25 | -5.346747125  | -5.145980704  | 5.704378574  |
| C26 | -4.512610945  | -3.683323941  | 3.833764420  |
| C27 | -2.387190581  | -8.669352172  | 6.410818556  |
| C28 | -1.266688140  | -8.516028917  | 7.419582216  |
| C29 | 11.398847597  | -7.290956195  | 0.644566091  |
| C30 | 11.076718426  | -5.968762285  | 1.327604920  |
| C31 | 9.491249321   | -4.927777834  | 2.937324906  |
| C32 | 9.879360164   | -4.953798617  | 4.426586198  |
| C33 | 7.965118623   | -4.979748047  | 2.757326882  |
| C34 | 7.256390546   | -3.792538454  | 3.403724643  |
| C35 | 5.790830737   | -3.701583471  | 2.981758350  |
| C36 | 4.153835632   | -2.291239646  | 4.265511727  |
| C37 | 10.748465134  | -3.630759696  | 6.295965687  |
| C38 | 9.843926798   | -2.723438800  | 7.100617074  |
| C39 | -1.501452461  | -2.039065500  | -5.627905575 |
| C40 | -2.871023331  | -1.780725541  | -4.970467405 |
| C41 | -0.379845203  | -1.606545439  | -4.664810481 |
| C42 | 1.025109777   | -2.141111829  | -5.010662681 |
| C43 | 1.851334573   | -1.289645756  | -5.974002877 |
| C44 | -4.551704703  | 0.030476349   | -4.705867199 |
| C45 | -5.840883087  | -0.792609299  | -4.635003844 |
| C46 | -4.766660918  | 1.397034238   | -5.372185378 |
| C47 | -7.172766935  | -2.588966199  | -5.628357418 |
| C48 | -7.207639274  | -3.576602277  | -4.455739070 |
| C49 | -6.007385288  | -4.599834447  | -2.583843213 |
| C50 | -5.922089402  | -3.877821186  | -1.237019792 |
| C51 | -5.804655653  | -1.764790510  | -0.001363226 |
| C52 | -7.152129418  | -1.719903226  | 0.738059702  |
| C53 | -5.391187117  | -0.303075114  | -0.245865850 |
| C54 | -4.062240772  | -0.141218009  | -0.905512884 |
| C55 | -2.978581453  | -0.979385761  | -1.076280183 |
| C56 | -2.439271999  | 0.862824354   | -2.042754920 |
| C57 | -9.562870903  | -1.377911402  | 0.418983587  |
| C58 | -9.893159778  | -2.379348900  | 1.523614335  |
| C59 | -10.545093604 | -1.535862757  | -0.768514494 |
| C60 | -11.903767049 | -0.919630663  | -0.606767586 |

|       |               |              |              |
|-------|---------------|--------------|--------------|
| C61   | -12.764269631 | -0.903940757 | 0.473977766  |
| C62   | -13.664051018 | 0.167151652  | -1.245086346 |
| C63   | 4.568609527   | 1.448329021  | 8.771430059  |
| C64   | 6.081056353   | 1.343345007  | 8.821162625  |
| C65   | 4.116716629   | 0.770517636  | 7.450175379  |
| C66   | 2.616110315   | 0.745887749  | 7.283999409  |
| C67   | 1.841952229   | -0.314537224 | 7.792830600  |
| C68   | 1.9471111024  | 1.788244024  | 6.619803866  |
| C69   | 0.451054523   | -0.338089949 | 7.641461838  |
| C70   | 0.559333857   | 1.786891545  | 6.475788598  |
| C71   | -0.187851494  | 0.718347128  | 6.982517467  |
| C72   | -0.766604279  | 6.652235084  | 5.731230798  |
| C73   | -2.223405395  | 7.064259044  | 5.459386672  |
| C74   | -0.405917595  | 5.442380759  | 4.873489022  |
| C75   | -3.713020929  | 8.814466993  | 4.552611072  |
| C76   | -4.418453987  | 8.245049430  | 3.318333009  |
| C77   | -4.218786745  | 6.636352283  | 1.427452596  |
| C78   | -4.601905482  | 5.191190525  | 1.842027141  |
| C79   | -3.136924050  | 6.669762882  | 0.321710353  |
| C80   | -3.361965145  | 5.877674612  | -0.972181114 |
| C81   | -4.366609566  | 6.468375691  | -1.973950334 |
| C82   | -6.846935800  | 6.626681768  | -1.763377839 |
| C83   | -4.018940988  | 3.139749447  | 3.039879282  |
| C84   | -5.157183748  | 3.057236978  | 4.065691663  |
| C85   | -2.800711615  | 2.410276949  | 3.647704610  |
| C86   | -5.957291293  | 3.962522499  | 6.192498171  |
| C87   | -7.259365591  | 4.744209199  | 6.250821205  |
| C88   | -8.835009284  | 6.157172247  | 5.037341941  |
| C89   | -10.234107016 | 5.509195537  | 4.914458921  |
| C90   | -8.661907893  | 7.281933576  | 4.010945698  |
| C91   | -8.779097224  | 6.826542038  | 2.561088214  |
| C92   | -11.529492218 | 3.529287635  | 4.280853979  |
| C93   | -12.430814478 | 3.376314186  | 5.496435677  |
| C94   | -11.239100288 | 2.137382297  | 3.652464066  |
| C95   | -10.455094027 | 2.250356507  | 2.365051472  |
| C96   | -11.119177062 | 2.430318596  | 1.141639828  |
| C97   | -9.048928182  | 2.251992530  | 2.359130519  |
| C98   | -10.410230223 | 2.643589354  | -0.043405052 |
| C99   | -8.323425042  | 2.491347026  | 1.188648186  |
| C100  | -9.015880463  | 2.694696584  | -0.002706236 |
| C101  | 7.369303504   | 6.077708881  | -4.772707469 |
| C102  | 6.116784193   | 5.378875565  | -5.272919017 |
| C103  | 3.794669756   | 4.725327815  | -4.675526975 |
| C104  | 2.616794269   | 5.707707375  | -4.700396788 |
| C105  | 1.190507477   | 7.144432136  | -3.310045142 |
| C106  | 1.389611657   | 8.219854772  | -2.247056804 |
| C107  | 2.438933827   | 8.971072589  | -0.188400160 |
| C108  | 2.864804640   | 10.359813394 | -0.612185605 |
| C109  | 2.368255785   | 4.182029731  | -9.010545861 |
| C110  | 0.835360725   | 4.201919641  | -8.960211869 |
| C111  | 2.902978706   | 2.963179577  | -8.225198375 |
| C112  | 4.381320968   | 2.690264719  | -8.555767306 |
| C113  | 4.965260953   | 1.678207304  | -7.595373833 |
| C114  | -1.179158532  | 4.848915603  | -7.741414780 |
| C115  | -1.607502190  | 6.207764359  | -7.222913056 |
| C116  | -1.841068136  | 3.647160294  | -7.025381908 |
| C117  | -1.172243773  | 3.381516947  | -5.707034857 |
| C118  | -1.523990791  | 4.114601152  | -4.562747073 |
| C119  | -0.067529705  | 2.514570440  | -5.649250130 |
| C120  | -0.739166692  | 4.036160023  | -3.409768027 |
| C121  | 0.714717140   | 2.439436763  | -4.495903005 |
| C122  | 0.398160814   | 3.227465017  | -3.386882494 |
| C123  | 10.826106005  | 2.863723290  | -0.792399235 |
| C124  | 11.490883784  | 2.465849283  | 0.536075204  |
| C125  | 9.987725363   | 1.697443505  | -1.338198963 |
| C126  | 9.107805922   | 1.993618610  | -2.510962212 |
| C127  | 9.490057728   | 2.431051770  | -3.761953392 |
| C128  | 7.340955717   | 1.895856610  | -3.800508309 |
| C129  | 12.807742841  | 0.884656361  | 1.816400963  |
| C130  | 13.679279965  | 1.962357152  | 2.422584137  |
| C131  | 5.184188387   | -3.350182788 | -2.822857467 |
| C132  | 6.222328582   | -3.140269210 | -1.719559074 |
| C133  | 7.209990737   | -1.969987303 | -1.993316374 |
| C134  | 8.244342557   | -2.388870356 | -3.074146498 |
| C135  | 9.442824392   | -1.448990672 | -3.234832754 |
| C136  | 10.557933948  | -1.991153044 | -4.156407516 |
| C137  | 7.982118182   | -1.636069879 | -0.709885394 |
| C138  | 3.430077559   | 2.533419994  | 0.591257499  |
| Fe139 | 4.804236447   | 3.106916198  | -0.768727081 |
| Fe140 | 1.428336823   | 2.492697024  | 0.495432478  |
| Fe141 | 3.307361058   | 3.007861952  | 2.537142740  |
| Fe142 | 3.050654448   | 4.488947344  | 0.427163710  |

|       |              |               |               |
|-------|--------------|---------------|---------------|
| Fe143 | 1.119755641  | 4.487718187   | 2.262436623   |
| Fe144 | 5.116374020  | 1.685267886   | 1.328937828   |
| Fe145 | 3.402368909  | 0.697404910   | -0.324991334  |
| H146  | 0.817397987  | -6.509105237  | -7.252037913  |
| H147  | 0.256699349  | -5.038651223  | -7.675423298  |
| H148  | -3.598523747 | -6.904094912  | -7.589891979  |
| H149  | -1.701036394 | -5.983308000  | -8.693293435  |
| H150  | -1.070953569 | -7.588704328  | -8.335269135  |
| H151  | -3.940593273 | -5.756334160  | -5.057837888  |
| H152  | -2.820527373 | -9.045564783  | -5.725305944  |
| H153  | -5.035549176 | -6.939938949  | -5.803878168  |
| H154  | -2.245456294 | -10.758474135 | -4.266050475  |
| H155  | -0.810442281 | -8.023631862  | -4.251701285  |
| H156  | -3.435829166 | -10.146673382 | -3.099066113  |
| H157  | -1.492947719 | -4.440547385  | -0.620503998  |
| H158  | -1.519160151 | -6.106271964  | -2.944624545  |
| H159  | 1.053041151  | -7.222019393  | -3.099884899  |
| H160  | -4.712549115 | -7.298748329  | 1.319480758   |
| H161  | -3.472523432 | -7.427051030  | -1.279800466  |
| H162  | 0.917436457  | -8.532396929  | -1.903976587  |
| H163  | -2.863708649 | -4.722367474  | -1.711204929  |
| H164  | -1.909587703 | -9.296620671  | 0.182180611   |
| H165  | -4.658008277 | -8.716299759  | 0.237083912   |
| H166  | 1.131064587  | -4.620685018  | 0.320396624   |
| H167  | 0.626270071  | -2.949504649  | -0.028365465  |
| H168  | 1.861589155  | -3.283019878  | 1.219063413   |
| H169  | -1.065220197 | -4.212589838  | 1.391930776   |
| H170  | -0.887794402 | -11.000467615 | 1.392857537   |
| H171  | -3.816554120 | -3.572236486  | 2.991424635   |
| H172  | -2.661292476 | -7.670967903  | 4.548583680   |
| H173  | -5.290213075 | -6.120139955  | 6.212960412   |
| H174  | 0.242547348  | -1.832126245  | 2.835842528   |
| H175  | -1.412688919 | -2.428918786  | 3.092364450   |
| H176  | 4.164024309  | 0.856998493   | 9.615455272   |
| H177  | -5.531754602 | -3.618475956  | 3.428406678   |
| H178  | -6.359225839 | -5.037213750  | 5.288106918   |
| H179  | -4.366461468 | -2.831721347  | 4.518308486   |
| H180  | -5.206681860 | -4.359895680  | 6.463419830   |
| H181  | -4.453958057 | -5.841744063  | 3.873453437   |
| H182  | -2.666119675 | -4.207673632  | 5.749947331   |
| H183  | -2.231947479 | -5.322112320  | 3.090579923   |
| H184  | -0.956389366 | -1.744861173  | 1.520567208   |
| H185  | -1.904368836 | 2.641755116   | 3.052783783   |
| H186  | -3.005207245 | 1.331405467   | 3.572157610   |
| H187  | -2.289111975 | 2.004793570   | 5.507528366   |
| H188  | -1.957677700 | -0.066357921  | 7.134029676   |
| H189  | 0.057368674  | 2.592902993   | 5.941001894   |
| H190  | 2.522637610  | 2.604102492   | 6.176543952   |
| H191  | 2.333138179  | -1.143494816  | 8.309431785   |
| H192  | -0.031902219 | -6.487957131  | 1.928170056   |
| H193  | 2.718305773  | -7.998554878  | 1.456484307   |
| H194  | 2.413766750  | -8.604550275  | 3.098984228   |
| H195  | 0.397817534  | -8.390355130  | 0.916555074   |
| H196  | -1.791090650 | -10.517905155 | 2.853662835   |
| H197  | -0.132798317 | -1.180043571  | 8.023472029   |
| H198  | 1.235376441  | -4.241567819  | 3.379503958   |
| H199  | -3.321018837 | -8.905959431  | 6.948178030   |
| H200  | -2.131117669 | -9.534370775  | 5.777849080   |
| H201  | -0.434895921 | -7.845458996  | 7.103043815   |
| H202  | 11.786518167 | -3.272521530  | 6.376476630   |
| H203  | 3.774436944  | -0.737736004  | -6.396059189  |
| H204  | 5.450721661  | -1.419610832  | -2.989757072  |
| H205  | 4.458950230  | 2.282605019   | -9.573611622  |
| H206  | 4.957230349  | 3.625969033   | -8.513957954  |
| H207  | 2.310247663  | 2.067581233   | -8.467373102  |
| H208  | -0.869734070 | 7.025523010   | -7.401154887  |
| H209  | 2.588709872  | 4.009902810   | -10.074728757 |
| H210  | -0.365971390 | -0.508023129  | -4.607943622  |
| H211  | 0.946724449  | -3.146215986  | -5.462516815  |
| H212  | 0.851172364  | 5.149590362   | -7.110530735  |
| H213  | -1.553651524 | 4.842441297   | -8.787020804  |
| H214  | 2.889074337  | 5.661621686   | -7.649151910  |
| H215  | 3.620840211  | -1.732522297  | -4.950296932  |
| H216  | 2.769305679  | 3.146883966   | -7.148669062  |
| H217  | 3.917946651  | 5.524427125   | -8.927679786  |
| H218  | -1.741119913 | -1.903194849  | -7.679249254  |
| H219  | -0.644953015 | -1.952181254  | -3.657497246  |
| H220  | 5.734246187  | 3.173680867   | -6.579812701  |
| H221  | 1.595288113  | -2.279035515  | -4.080125047  |
| H222  | -5.091580966 | -2.264282976  | 0.669177795   |
| H223  | -2.876432822 | -2.008256578  | -0.741354212  |
| H224  | -6.928655182 | -5.197996556  | -2.562848853  |

|      |               |              |              |
|------|---------------|--------------|--------------|
| H225 | -5.191276166  | -3.257841726 | -4.035117726 |
| H226 | -8.087293958  | -1.748247058 | -1.086764625 |
| H227 | -12.677712442 | -1.292891813 | 1.482006978  |
| H228 | -9.466437211  | -3.395753058 | 1.346590117  |
| H229 | -10.626953000 | -2.608103527 | -1.022649534 |
| H230 | -9.626666438  | -0.359617577 | 0.834346080  |
| H231 | -14.391562888 | 0.732155389  | -1.822297835 |
| H232 | -5.400129319  | 0.198345995  | 0.736327121  |
| H233 | -6.167544363  | 0.186802259  | -0.857159502 |
| H234 | -14.701120585 | -0.004747109 | 0.605663201  |
| H235 | -10.084767605 | -1.048518889 | -1.642903421 |
| H236 | -5.892658758  | -2.005905118 | -2.136656675 |
| H237 | -5.169009526  | -5.310711394 | -2.635734959 |
| H238 | -8.121841381  | -2.036918380 | -5.587848517 |
| H239 | -1.902700632  | 1.650888941  | -2.566407233 |
| H240 | -7.162716167  | -3.164505680 | -6.562864722 |
| H241 | 4.292343634   | 3.240699198  | 9.728586074  |
| H242 | 3.203871510   | 2.959644564  | 8.540702524  |
| H243 | -2.763149334  | 4.884077908  | 2.792852040  |
| H244 | -4.355065124  | 2.568726771  | 2.162386042  |
| H245 | -4.429867152  | 4.751237468  | 4.964998144  |
| H246 | -4.305036584  | 1.865948864  | -1.612613973 |
| H247 | -5.825126373  | 2.717060703  | -3.027734123 |
| H248 | -6.039789133  | 2.879355084  | -5.244263315 |
| H249 | -6.662981457  | 2.787615652  | -1.687048967 |
| H250 | -3.808850983  | 1.943857067  | -5.342531927 |
| H251 | -5.062458864  | 1.251931787  | -6.424391469 |
| H252 | -7.713011807  | 7.805519269  | 4.194445744  |
| H253 | -9.476621095  | 8.002303623  | 4.184045136  |
| H254 | -7.045554829  | 7.853687959  | 2.074766587  |
| H255 | -7.864872290  | 6.996379084  | 0.771833252  |
| H256 | -7.740280041  | 8.467009037  | -1.892293627 |
| H257 | -4.037795656  | 6.254065458  | -3.002581816 |
| H258 | -10.941500718 | 2.776006146  | -0.988914805 |
| H259 | -8.489643878  | 2.063482742  | 3.279300726  |
| H260 | -7.997499419  | 5.015870777  | -1.195691200 |
| H261 | -2.198965346  | 6.303477635  | 0.769767931  |
| H262 | -2.731204255  | 7.193271779  | 2.847791728  |
| H263 | -3.619120652  | 4.826808356  | -0.763768701 |
| H264 | -5.313622869  | -1.780947529 | -6.340007118 |
| H265 | -3.631597029  | 9.901805530  | 4.423149744  |
| H266 | -2.894847541  | -0.166364823 | -6.128557740 |
| H267 | -2.961121231  | 7.728700211  | 0.068188704  |
| H268 | -7.235080996  | 2.546035115  | 1.218627974  |
| H269 | -4.387653864  | 8.629448263  | 5.400527075  |
| H270 | -6.122524916  | 8.406799425  | -2.501676889 |
| H271 | -8.881185031  | 6.418967585  | -1.698602075 |
| H272 | -0.433422030  | -1.047247732 | -7.079449358 |
| H273 | -1.442304773  | -3.139083741 | -5.746396055 |
| H274 | -12.211409926 | 2.406308904  | 1.109913025  |
| H275 | -4.267896962  | 0.193862637  | -3.656518266 |
| H276 | -5.146830688  | 7.111312865  | 1.092629593  |
| H277 | -4.394562600  | 7.560628078  | -1.863455969 |
| H278 | -2.387599116  | 5.851654625  | -1.481372958 |
| H279 | -5.793879776  | 4.885127808  | -1.837794789 |
| H280 | -6.202821475  | 2.902072465  | 6.357985397  |
| H281 | -7.096579881  | 5.147570732  | 4.252146713  |
| H282 | -8.854775231  | 6.627622108  | 6.032523303  |
| H283 | -5.336731777  | 4.303990616  | 7.032262279  |
| H284 | -9.402314095  | 3.739589578  | 4.365337019  |
| H285 | 7.092034766   | 6.916485350  | -4.116995241 |
| H286 | 7.887509872   | 5.331730542  | -4.135116909 |
| H287 | 10.156585583  | 3.699272002  | -0.538495105 |
| H288 | 9.111303243   | 6.779385606  | -5.562283742 |
| H289 | 8.269057847   | 5.806407921  | -6.576099478 |
| H290 | 0.634558185   | 5.165315008  | 5.090150929  |
| H291 | -1.254719397  | 5.624944847  | 7.427321483  |
| H292 | -1.577592251  | 8.809900347  | 4.586086560  |
| H293 | -1.067541361  | 4.599137571  | 5.119842587  |
| H294 | -0.730820935  | 7.144545245  | 7.724495571  |
| H295 | 3.203231015   | 8.585769339  | 0.503637481  |
| H296 | -0.091773670  | 7.483867932  | 5.473615156  |
| H297 | 7.589289648   | -5.931096234 | 3.170666546  |
| H298 | 9.877825206   | -4.014310047 | 2.467845594  |
| H299 | 2.922650285   | 7.193848173  | -1.268107799 |
| H300 | 2.960692596   | -0.908926041 | 5.199751631  |
| H301 | 1.026743085   | 7.648925710  | -4.270037067 |
| H302 | 1.571321766   | 1.762374480  | -4.451673910 |
| H303 | 0.247988117   | 6.630049028  | -3.053817971 |
| H304 | 5.215208128   | -4.551901534 | 3.366843723  |
| H305 | 2.706491514   | 5.736489976  | -2.665650615 |
| H306 | 5.709706517   | -3.725997433 | 1.883000604  |

|       |               |              |              |
|-------|---------------|--------------|--------------|
| H307  | 7.771366490   | -4.984154971 | 1.672591973  |
| H308  | 7.754760735   | -2.858376869 | 3.103246038  |
| H309  | 7.311336650   | -3.851161322 | 4.502386180  |
| H310  | -1.759459627  | 2.774158044  | -7.688767882 |
| H311  | 9.740121062   | -7.002243798 | 2.400474199  |
| H312  | 10.965286028  | -7.221124672 | -0.364571060 |
| H313  | 1.010724461   | 3.172708880  | -2.488673886 |
| H314  | 11.489748496  | -8.818646409 | 2.024309203  |
| H315  | 10.668246854  | -9.216002722 | 0.664458897  |
| H316  | 5.714483524   | -1.601071621 | 3.180442194  |
| H317  | -1.001163739  | 4.604798305  | -2.516147271 |
| H318  | 0.189236048   | 1.906572126  | -6.520055087 |
| H319  | 12.520655767  | -1.666005725 | -0.725633184 |
| H320  | 10.666495962  | 0.877273771  | -1.629863761 |
| H321  | 10.289434039  | -2.200024989 | 0.397406451  |
| H322  | 12.559795885  | -1.431140338 | -2.262225268 |
| H323  | 3.406876555   | 10.407416193 | -1.586322255 |
| H324  | 7.984633519   | -0.436409239 | 1.600225951  |
| H325  | 6.759496218   | -4.078782654 | -1.542124376 |
| H326  | 5.179646750   | 5.808811130  | -3.501031147 |
| H327  | 8.612478954   | -3.384324840 | -2.782960667 |
| H328  | 8.318386001   | 2.559523614  | -5.550978243 |
| H329  | 6.348115282   | 1.713642156  | -4.194661798 |
| H330  | 12.494247404  | -7.329340404 | 0.515443478  |
| H331  | 4.304764186   | -0.206489288 | 4.335272203  |
| H332  | 9.655365284   | -1.026754812 | 3.157503459  |
| H333  | 7.617756729   | 0.428575763  | 2.834163856  |
| H334  | 10.420023071  | -2.941371896 | 4.286758062  |
| H335  | 3.425400807   | -4.250281918 | 4.198206906  |
| H336  | 9.107079273   | -0.489301662 | -3.656538236 |
| H337  | 9.891258171   | -1.229209737 | -2.256252238 |
| H338  | 7.721044661   | -2.505614493 | -4.035232945 |
| H339  | 3.643146569   | 3.963627181  | -3.894450842 |
| H340  | -2.393352174  | 4.777249413  | -4.596100678 |
| H341  | -2.907581949  | 3.891058331  | -6.902249553 |
| H342  | 5.642491870   | -2.906994390 | -0.810125102 |
| H343  | 10.866062922  | -1.664331915 | 2.410619321  |
| H344  | 11.424374989  | -3.148783438 | 0.857971158  |
| H345  | 2.593246186   | -3.171940696 | 5.246927278  |
| H346  | 10.454290554  | 2.748321567  | -4.140596250 |
| H347  | 9.367804526   | 1.299714906  | -0.526835748 |
| H348  | 3.847643658   | 4.236913717  | -5.651311226 |
| H349  | 1.488589274   | 9.033667969  | 0.364307305  |
| H350  | 4.513598465   | -0.255807805 | 7.446929395  |
| H351  | 4.577903559   | 1.311346674  | 6.607636750  |
| H352  | 12.314529090  | 4.146541565  | -1.379844111 |
| H353  | 12.494086293  | 2.635863305  | -1.982038062 |
| H354  | 13.459711737  | 0.023003663  | 1.600541899  |
| H355  | 12.283814195  | 0.681390639  | -0.240956106 |
| H356  | 14.116797768  | 2.677592045  | 1.685200961  |
| H357  | 12.056305540  | 0.555214634  | 2.551385799  |
| H358  | 6.608355981   | 2.119707760  | 8.215397143  |
| H359  | -11.912841529 | 3.446257681  | 6.481819889  |
| H360  | 10.699703419  | -4.630634485 | 6.763559060  |
| H361  | 8.803160707   | -2.619589358 | 6.707688941  |
| H362  | -12.068339044 | 4.147596473  | 3.543361980  |
| H363  | -10.695945815 | 1.519042782  | 4.384803254  |
| H364  | -12.210610414 | 1.655508868  | 3.470960660  |
| H365  | 2.678320492   | -0.124672856 | 2.078060899  |
| H366  | -8.858221168  | 2.865949637  | -1.933911506 |
| H367  | 2.444561192   | -1.416174345 | 1.056693436  |
| H368  | 1.356383865   | -0.164704739 | 1.066971230  |
| Mo369 | 6.191099301   | 0.805022248  | -0.993012743 |
| N370  | 2.351513175   | -0.402770306 | 1.145493299  |
| N371  | -0.845906721  | 2.135469843  | 0.584952647  |
| N372  | -1.946768088  | 2.004439959  | 0.672682685  |
| N373  | 0.264090093   | -6.020777181 | -7.961017394 |
| N374  | -3.146945353  | -6.861626148 | -6.678897417 |
| N375  | -3.033040991  | -8.893734550 | -4.742445165 |
| N376  | -0.627006921  | -8.435168886 | -3.333471155 |
| N377  | -1.298800668  | -6.062968777 | -1.951621878 |
| N378  | -3.369454277  | -7.173163154 | -0.293586259 |
| N379  | -2.026930486  | -9.268078536 | 1.199341609  |
| N380  | 0.767066737   | -8.667705325 | 1.829820230  |
| N381  | 0.631020559   | -5.997021185 | 2.524872842  |
| N382  | -1.899283826  | -5.113793785 | 4.036481623  |
| N383  | -2.516347442  | -7.510562261 | 5.548093164  |
| N384  | 10.828480637  | -8.459560187 | 1.331752850  |
| N385  | 10.097079911  | -6.053123516 | 2.248104134  |
| N386  | 5.206874954   | -2.446017342 | 3.456054168  |
| N387  | 3.419813229   | -3.346754457 | 4.681815397  |
| N388  | 3.825027072   | -1.056864575 | 4.686016147  |

|      |               |              |              |
|------|---------------|--------------|--------------|
| N389 | 10.340932682  | -3.773500772 | 4.913322532  |
| N390 | -1.419388765  | -1.315210549 | -6.906192163 |
| N391 | 3.181914185   | -1.279794466 | -5.759646449 |
| N392 | -3.465701094  | -0.636723577 | -5.407783988 |
| N393 | -6.050022296  | -1.670048181 | -5.646607851 |
| N394 | -6.047459018  | -3.764601026 | -3.769544928 |
| N395 | -5.887040898  | -2.515544977 | -1.250895454 |
| N396 | -3.701998525  | 1.035245728  | -1.534483908 |
| N397 | -1.976009668  | -0.350656079 | -1.780892548 |
| N398 | -8.230475058  | -1.658295929 | -0.083954011 |
| N399 | -12.479144335 | -0.248907274 | -1.674901301 |
| N400 | -13.875659315 | -0.206196477 | 0.048448410  |
| N401 | 4.194470588   | 2.864345904  | 8.782665214  |
| N402 | -0.551944910  | 6.317291215  | 7.148421418  |
| N403 | -2.400106211  | 8.273846614  | 4.850548253  |
| N404 | -3.696517465  | 7.397041807  | 2.559633015  |
| N405 | -5.718340926  | 5.923840276  | -1.807941457 |
| N406 | -6.867502405  | 7.957154780  | -1.981439904 |
| N407 | -7.998211408  | 6.021074111  | -1.390255534 |
| N408 | -3.714792760  | 4.510594358  | 2.622646069  |
| N409 | -5.212580485  | 4.091361215  | 4.953841537  |
| N410 | -7.720639315  | 5.225421469  | 5.055948996  |
| N411 | -7.894135614  | 7.405716453  | 1.704590748  |
| N412 | -10.275837996 | 4.179725310  | 4.646273723  |
| N413 | 8.169196213   | 6.568045580  | -5.898204215 |
| N414 | 5.056184283   | 5.417176675  | -4.440344408 |
| N415 | 2.261218416   | 6.180518620  | -3.486796949 |
| N416 | 2.351773081   | 8.045760460  | -1.306520530 |
| N417 | 2.931608287   | 5.493088356  | -8.661462011 |
| N418 | 0.264855498   | 4.781327462  | -7.866007617 |
| N419 | 11.796931437  | 3.360475733  | -1.784089100 |
| N420 | 7.751022281   | 1.671681390  | -2.551732430 |
| N421 | 8.363173508   | 2.365682762  | -4.553585060 |
| N422 | 12.210211292  | 1.310791559  | 0.563119296  |
| O423 | -1.233861394  | -6.384063101 | -5.535147304 |
| O424 | -3.954522005  | -7.480606024 | -3.206716663 |
| O425 | -1.382384633  | -9.801344563 | -1.667613129 |
| O426 | 0.049120221   | -6.793862426 | -0.265832890 |
| O427 | -2.804022484  | -5.563155520 | 1.207105383  |
| O428 | -3.370827590  | -8.652160213 | 2.944470822  |
| O429 | 0.452529561   | -9.882997099 | 3.748504733  |
| O430 | 2.768291534   | -6.036749800 | 3.386616351  |
| O431 | -0.182446465  | -4.345091811 | 5.335335373  |
| O432 | -2.632718997  | -6.109931915 | 7.332652612  |
| O433 | -1.226712851  | -9.137297790 | 8.471825393  |
| O434 | 11.678468770  | -4.927871016 | 0.994547701  |
| O435 | 9.752427740   | -5.988909981 | 5.104262013  |
| O436 | 10.199258656  | -2.145379448 | 8.115871316  |
| O437 | -3.375619993  | -2.546230060 | -4.128302246 |
| O438 | 1.334573552   | -0.664712999 | -6.928836993 |
| O439 | -6.631372469  | -0.657045011 | -3.685262529 |
| O440 | -5.792589911  | 2.129674881  | -4.674232683 |
| O441 | -8.268709465  | -4.162088268 | -4.193261462 |
| O442 | -5.895493561  | -4.537169902 | -0.190275645 |
| O443 | -7.238713643  | -1.650908652 | 1.969274848  |
| O444 | -10.602995667 | -2.140423865 | 2.486442829  |
| O445 | 6.695483046   | 0.485458267  | 9.438667271  |
| O446 | -1.555317551  | 0.752539469  | 6.790713076  |
| O447 | -3.182584728  | 6.342561042  | 5.783210718  |
| O448 | -5.592700618  | 8.590017766  | 3.077055158  |
| O449 | -5.683142977  | 4.706317344  | 1.474453899  |
| O450 | -5.916921751  | 2.081015557  | 4.098614121  |
| O451 | -2.593238398  | 2.791600460  | 5.011047374  |
| O452 | -7.859973623  | 4.901180244  | 7.321793947  |
| O453 | -11.253475179 | 6.185963692  | 5.114005688  |
| O454 | -9.659197920  | 6.034822613  | 2.192055895  |
| O455 | -13.629551831 | 3.156114141  | 5.416491600  |
| O456 | -8.274486906  | 2.989024853  | -1.160579901 |
| O457 | 6.117845372   | 4.778139656  | -6.375700952 |
| O458 | 2.062708547   | 6.047362852  | -5.767385490 |
| O459 | 0.628507673   | 9.202862142  | -2.240461484 |
| O460 | 2.672211648   | 11.357969266 | 0.064439523  |
| O461 | 0.153058917   | 3.693306033  | -9.866703081 |
| O462 | 4.800598044   | 0.468153072  | -7.705465631 |
| O463 | 5.660178459   | 2.170381121  | -6.548632793 |
| O464 | -2.689520272  | 6.439154589  | -6.701153363 |
| O465 | 11.412533707  | 3.189768762  | 1.547804200  |
| O466 | 13.964577752  | 2.017710311  | 3.610863128  |
| O467 | 4.770394727   | -2.233393179 | -3.413993769 |
| O468 | 4.729731549   | -4.463061489 | -3.102490288 |
| O469 | 11.767994212  | -1.793361747 | -3.782406690 |
| O470 | 10.209108349  | -2.564868688 | -5.226339996 |

|      |              |              |              |
|------|--------------|--------------|--------------|
| O471 | 7.895641857  | -0.408988471 | -0.271435770 |
| O472 | 8.673878434  | -2.511199797 | -0.151134262 |
| O473 | 6.437382123  | -0.835122325 | -2.394861334 |
| O474 | 10.540437758 | -1.435757462 | 3.325578494  |
| O475 | 7.939947601  | -0.459617108 | 2.590183220  |
| O476 | -5.820471451 | 3.074854302  | -2.102568196 |
| O477 | 13.092094177 | -1.276663104 | -1.424953511 |
| O478 | 11.220617012 | -2.186016113 | 0.754117635  |
| S479 | -0.571726932 | 5.800640361  | 3.064816434  |
| S480 | 0.867516273  | 4.638717237  | -0.023476492 |
| S481 | 4.316078549  | 1.489719101  | -2.277212498 |
| S482 | 1.171196176  | 2.322087872  | 2.843836403  |
| S483 | 1.377140073  | 1.039793009  | -1.170110528 |
| S484 | 4.430847628  | 5.270222715  | -1.125215957 |
| S485 | 5.065518313  | -0.437245236 | 0.631780762  |
| S486 | 3.265124449  | 5.230783965  | 2.596956311  |
| S487 | 6.749243695  | 2.745516787  | 0.259502611  |
| S488 | 4.931731606  | 1.861464916  | 3.512946423  |
| end  |              |              |              |

| core<br>2N2 associated<br>35, S=1 | bm522bz22n2xdta.car_4 |              |               |              |
|-----------------------------------|-----------------------|--------------|---------------|--------------|
| Fe (139) -2.312                   | C1                    | -8.407818188 | -4.487151901  | -0.716217807 |
| Fe (140) -1.625                   | C2                    | -8.757243132 | -5.514793970  | -1.798998878 |
| Fe (141) -2.771                   | C3                    | -9.152852656 | -2.467319397  | 0.469617576  |
| Fe (142) 2.409                    | C4                    | -8.888208087 | -2.852250330  | 1.922896340  |
| Fe (143) 2.874                    | C5                    | -9.083812799 | -4.541967386  | 3.676924364  |
| Fe (144) 2.062                    | C6                    | -7.596879256 | -4.805874430  | 3.936569931  |
| Fe (145) 1.170                    | C7                    | -5.409528438 | -5.317034250  | 2.972856222  |
|                                   | C8                    | -4.719218111 | -3.964149040  | 3.158271276  |
|                                   | C9                    | -4.662650071 | -1.597974073  | 2.538830448  |
|                                   | C10                   | -4.817463558 | -1.023176664  | 3.954221903  |
|                                   | C11                   | -6.213900123 | -0.757794751  | 5.918647245  |
|                                   | C12                   | -5.462448538 | -1.528792332  | 7.013074424  |
|                                   | C13                   | -5.072197756 | -3.703672939  | 8.069160733  |
|                                   | C14                   | -3.603954434 | -4.140580523  | 7.969624500  |
|                                   | C15                   | -1.813648650 | -4.930033941  | 6.476411257  |
|                                   | C16                   | -0.806715970 | -3.909376578  | 5.940718175  |
|                                   | C17                   | -0.449444348 | -1.811154839  | 4.704988396  |
|                                   | C18                   | -0.169890875 | -0.693886787  | 5.725522735  |
|                                   | C19                   | -0.933261596 | -1.296761028  | 3.334416563  |
|                                   | C20                   | -0.070306658 | -0.125233981  | 2.850757864  |
|                                   | C21                   | -0.927717542 | -2.436765090  | 2.309322461  |
|                                   | C22                   | -1.107845344 | 1.155613197   | 7.060496846  |
|                                   | C23                   | -1.102209152 | 0.643015959   | 8.513855830  |
|                                   | C24                   | -2.190697454 | 2.232114152   | 6.806826922  |
|                                   | C25                   | -2.155121353 | 3.322035239   | 7.885046182  |
|                                   | C26                   | -2.018666724 | 2.850830018   | 5.413973451  |
|                                   | C27                   | -2.164320327 | -0.730767904  | 10.214431901 |
|                                   | C28                   | -0.844020853 | -1.225035172  | 10.765732896 |
|                                   | C29                   | 3.615978343  | -12.407667487 | 4.202532691  |
|                                   | C30                   | 4.441928574  | -11.184218473 | 3.813276677  |
|                                   | C31                   | 4.882478645  | -8.812390068  | 4.435386900  |
|                                   | C32                   | 5.919383406  | -8.637150389  | 5.560842787  |
|                                   | C33                   | 3.840277336  | -7.680830514  | 4.456573555  |
|                                   | C34                   | 4.466685619  | -6.299510494  | 4.269417647  |
|                                   | C35                   | 3.410900131  | -5.223428823  | 4.033658157  |
|                                   | C36                   | 3.728354578  | -2.745822981  | 4.302009458  |
|                                   | C37                   | 8.236092503  | -8.047808536  | 6.091642168  |
|                                   | C38                   | 8.647110166  | -6.600726022  | 6.246629105  |
|                                   | C39                   | -5.153727600 | -2.019340003  | -2.816071071 |
|                                   | C40                   | -5.553294559 | -0.610234441  | -2.334502714 |
|                                   | C41                   | -3.678063923 | -2.287449795  | -2.460212196 |
|                                   | C42                   | -3.245508748 | -3.766598217  | -2.524466699 |
|                                   | C43                   | -2.773117289 | -4.272381355  | -3.887651694 |
|                                   | C44                   | -5.477009796 | 1.752078885   | -3.113087533 |
|                                   | C45                   | -6.725033689 | 2.325893403   | -2.434656186 |
|                                   | C46                   | -5.195824622 | 2.415582223   | -4.469635810 |
|                                   | C47                   | -9.101223126 | 2.026757319   | -1.935380283 |
|                                   | C48                   | -9.038931433 | 1.960248412   | -0.404720728 |
|                                   | C49                   | -7.837660504 | 1.180503184   | 1.580997557  |
|                                   | C50                   | -6.665596276 | 1.994573232   | 2.132559305  |
|                                   | C51                   | -4.748247154 | 3.456315376   | 1.708509635  |
|                                   | C52                   | -5.191565408 | 4.776837786   | 2.358695462  |
|                                   | C53                   | -3.800850605 | 3.825934208   | 0.555573562  |
|                                   | C54                   | -3.209559883 | 2.655308172   | -0.154104052 |
|                                   | C55                   | -3.105960309 | 1.312507463   | 0.146889933  |
|                                   | C56                   | -2.206644880 | 1.538175912   | -1.790094833 |
|                                   | C57                   | -6.724628601 | 6.680916776   | 2.119945217  |
|                                   | C58                   | -6.977225309 | 6.735121637   | 3.625087295  |
|                                   | C59                   | -8.041887154 | 6.937395548   | 1.347330340  |
|                                   | C60                   | -8.497563543 | 8.361810057   | 1.227707787  |
|                                   | C61                   | -8.460969063 | 9.407651746   | 2.129758345  |

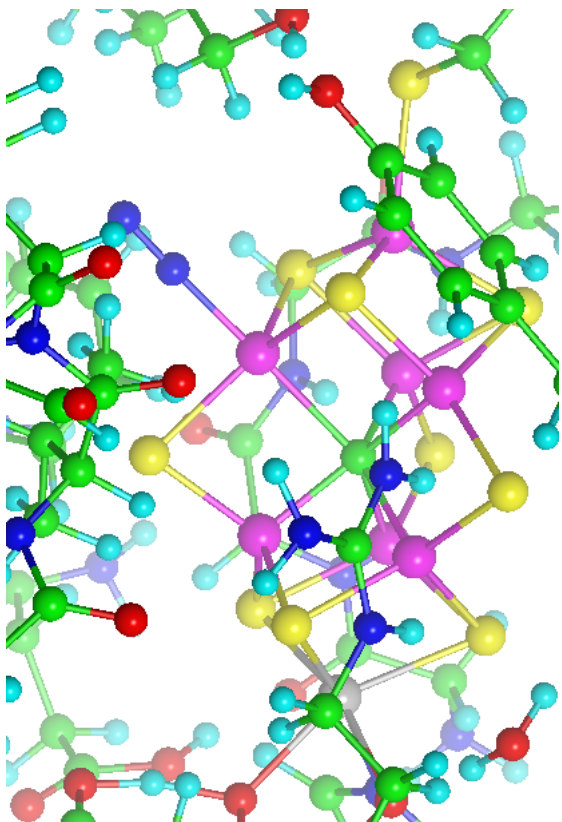

|       |              |               |              |
|-------|--------------|---------------|--------------|
| C62   | -9.392329408 | 10.061335765  | 0.228133944  |
| C63   | 8.252736771  | 0.213600684   | 5.553466893  |
| C64   | 9.147112093  | -1.011317306  | 5.521289301  |
| C65   | 6.876379110  | -0.213566554  | 4.985520857  |
| C66   | 5.859726135  | 0.903028246   | 5.015536547  |
| C67   | 5.044751729  | 1.119304017   | 6.142650900  |
| C68   | 5.701402483  | 1.765361394   | 3.914461507  |
| C69   | 4.094517219  | 2.146539645   | 6.169569957  |
| C70   | 4.768202973  | 2.803191253   | 3.931639037  |
| C71   | 3.959267713  | 2.987727458   | 5.057906469  |
| C72   | 6.188440941  | 6.173886657   | 0.354286716  |
| C73   | 5.351906363  | 7.417534353   | 0.013277885  |
| C74   | 5.281750004  | 4.951892871   | 0.491838965  |
| C75   | 4.887467912  | 9.170135056   | -1.663074577 |
| C76   | 3.458313611  | 8.973598702   | -2.175892030 |
| C77   | 1.673966832  | 7.290068626   | -2.612600404 |
| C78   | 0.849230161  | 6.963923852   | -1.340339604 |
| C79   | 1.782350412  | 6.086240519   | -3.576659212 |
| C80   | 0.505324011  | 5.377576545   | -4.042556341 |
| C81   | -0.344206459 | 6.102970284   | -5.098958733 |
| C82   | -1.747365979 | 8.149679499   | -4.815722451 |
| C83   | 0.724918515  | 5.851571112   | 0.837502487  |
| C84   | 0.522283404  | 7.051813192   | 1.773003902  |
| C85   | 1.419707806  | 4.735421015   | 1.643944446  |
| C86   | 1.677933543  | 8.920223488   | 2.853897513  |
| C87   | 1.295590657  | 10.346751864  | 2.496316833  |
| C88   | 0.412517873  | 11.844997236  | 0.796110927  |
| C89   | -0.905392472 | 12.523255713  | 1.247697724  |
| C90   | 0.581352603  | 11.955431575  | -0.722676280 |
| C91   | -0.527842045 | 11.272792215  | -1.512139805 |
| C92   | -3.163382275 | 12.225293036  | 2.147371699  |
| C93   | -3.170282333 | 13.266365258  | 3.256477662  |
| C94   | -4.080406206 | 11.030703478  | 2.536875824  |
| C95   | -4.217397337 | 10.030633362  | 1.411595876  |
| C96   | -5.209198776 | 10.195901634  | 0.433814786  |
| C97   | -3.321562275 | 8.956891052   | 1.268992686  |
| C98   | -5.293021908 | 9.338622380   | -0.666328057 |
| C99   | -3.369215301 | 8.109816499   | 0.158781404  |
| C100  | -4.353708844 | 8.315407062   | -0.803670341 |
| C101  | 5.465529659  | -3.962888869  | -8.169002923 |
| C102  | 4.011513162  | -3.562144858  | -7.980681234 |
| C103  | 2.481240185  | -1.956667458  | -6.862001527 |
| C104  | 2.248848732  | -0.539477648  | -7.395565454 |
| C105  | 2.847204777  | 1.826526236   | -7.102603760 |
| C106  | 4.126156252  | 2.649772003   | -6.962590869 |
| C107  | 6.306526470  | 2.981298154   | -5.935351314 |
| C108  | 7.195444301  | 3.162990679   | -7.149791383 |
| C109  | -1.041288107 | -2.744130501  | -9.725639281 |
| C110  | -1.989859394 | -1.550632860  | -9.558938232 |
| C111  | -0.952375826 | -3.540240749  | -8.403715620 |
| C112  | -0.355354132 | -4.941157348  | -8.636398460 |
| C113  | 0.009192457  | -5.595763350  | -7.323914434 |
| C114  | -2.272060726 | 0.769022049   | -8.830625051 |
| C115  | -1.512193495 | 2.013093367   | -9.248067669 |
| C116  | -2.933519943 | 0.855479089   | -7.433374851 |
| C117  | -1.943014349 | 0.631837227   | -6.321255852 |
| C118  | -1.148143528 | 1.686705091   | -5.839263952 |
| C119  | -1.736460764 | -0.659818911  | -5.808534132 |
| C120  | -0.150351571 | 1.444243428   | -4.891890065 |
| C121  | -0.736009339 | -0.900797629  | -4.862803838 |
| C122  | 0.069822134  | 0.148660697   | -4.413323077 |
| C123  | 7.978208799  | -6.931251393  | -3.392524743 |
| C124  | 8.905036947  | -7.230658584  | -2.205260651 |
| C125  | 6.509720087  | -7.206617000  | -3.034414581 |
| C126  | 5.492318019  | -6.774198497  | -4.041839225 |
| C127  | 5.323617279  | -7.274030431  | -5.316881467 |
| C128  | 3.644948532  | -5.916388205  | -4.833944240 |
| C129  | 9.575478086  | -8.705104583  | -0.400815963 |
| C130  | 11.044218062 | -8.620728581  | -0.750217429 |
| C131  | -0.136419859 | -6.836155774  | -0.554919886 |
| C132  | 1.232494613  | -7.106206889  | 0.065488370  |
| C133  | 2.383406425  | -7.297334427  | -0.968608131 |
| C134  | 2.265360940  | -8.704653070  | -1.618020863 |
| C135  | 3.466756673  | -9.149490564  | -2.455499142 |
| C136  | 3.385626224  | -10.608697508 | -2.954658465 |
| C137  | 3.727586376  | -7.211101387  | -0.233658394 |
| C138  | 3.845664228  | -1.067404445  | -1.398197499 |
| Fe139 | 4.376444791  | -2.252664110  | -2.977807250 |
| Fe140 | 2.269406014  | 0.398218222   | -1.011773223 |
| Fe141 | 5.062157283  | -0.057365540  | -0.130097848 |
| Fe142 | 4.482441305  | 0.306114812   | -2.625909298 |
| Fe143 | 4.218209044  | 2.304403029   | -0.976594246 |



|       |               |              |               |
|-------|---------------|--------------|---------------|
| Fe144 | 4.728263328   | -2.589158607 | -0.429130344  |
| Fe145 | 2.416643323   | -2.309071721 | -1.372227658  |
| H146  | -7.132474958  | -6.724069063 | -1.560940745  |
| H147  | -6.983731767  | -5.672812439 | -2.800249031  |
| H148  | -10.216555539 | -3.556378096 | -1.024271094  |
| H149  | -9.274355721  | -5.000497985 | -2.624623889  |
| H150  | -9.501145433  | -6.199451846 | -1.355481248  |
| H151  | -8.281783973  | -1.882222004 | 0.137808112   |
| H152  | -9.879722867  | -4.627283592 | 1.679549682   |
| H153  | -10.030740272 | -1.807439444 | 0.443402927   |
| H154  | -9.638293256  | -5.477499032 | 3.826942142   |
| H155  | -7.268781807  | -5.180852024 | 1.934088928   |
| H156  | -9.413318812  | -3.822460811 | 4.437841077   |
| H157  | -3.593605708  | -1.578572359 | 2.296034843   |
| H158  | -5.923981335  | -3.126491980 | 1.720263188   |
| H159  | -5.032175110  | -5.793475633 | 2.057374330   |
| H160  | -5.886050738  | 0.287482124  | 5.976112998   |
| H161  | -6.762385862  | -1.701726741 | 4.058066240   |
| H162  | -5.133920179  | -5.943337871 | 3.829906156   |
| H163  | -5.184805131  | -0.958595590 | 1.813617460   |
| H164  | -6.156457929  | -3.327865709 | 6.259466105   |
| H165  | -7.290802195  | -0.800159731 | 6.131367614   |
| H166  | -1.544058915  | -3.286689607 | 2.636791017   |
| H167  | -1.306312825  | -2.079933806 | 1.340152331   |
| H168  | 0.099219191   | -2.796169484 | 2.135906568   |
| H169  | -1.961418951  | -0.923640226 | 3.463713535   |
| H170  | -5.686397685  | -4.613722642 | 8.128446801   |
| H171  | -2.066005060  | 2.097816130  | 4.615000751   |
| H172  | -2.819364822  | -0.497715588 | 8.206444840   |
| H173  | -2.341722893  | 2.921177665  | 8.891767992   |
| H174  | -0.442458760  | 0.226418828  | 1.879297848   |
| H175  | 0.978758051   | -0.428304453 | 2.706515362   |
| H176  | 8.109581345   | 0.493781730  | 6.614510868   |
| H177  | -2.809994963  | 3.590749368  | 5.224197940   |
| H178  | -2.923355927  | 4.079755248  | 7.673652187   |
| H179  | -1.046375694  | 3.366300611  | 5.342560020   |
| H180  | -1.175048802  | 3.825275340  | 7.897025846   |
| H181  | -3.176176333  | 1.733085453  | 6.849822048   |
| H182  | -0.113728463  | 1.605425217  | 6.919116480   |
| H183  | -2.146186082  | -0.117236434 | 5.670050865   |
| H184  | -0.090441623  | 0.724774709  | 3.548916797   |
| H185  | 1.779667733   | 3.961873590  | 0.948551018   |
| H186  | 0.658405623   | 4.285662463  | 2.298543571   |
| H187  | 2.540776470   | 4.773166675  | 3.267840539   |
| H188  | 2.485464335   | 3.993491705  | 5.819518154   |
| H189  | 4.636139895   | 3.448748359  | 3.063306245   |
| H190  | 6.295409921   | 1.603201830  | 3.012578573   |
| H191  | 5.136876364   | 0.462152984  | 7.011743406   |
| H192  | -2.307133038  | -2.831254602 | 5.039989828   |
| H193  | -1.849037813  | -5.765394530 | 5.760086031   |
| H194  | -1.404071766  | -5.309037640 | 7.420605276   |
| H195  | -3.769141581  | -4.316984088 | 5.911679080   |
| H196  | -5.170143687  | -3.158251985 | 9.016283763   |
| H197  | 3.451245418   | 2.284022443  | 7.042483204   |
| H198  | 0.528446132   | -2.287657451 | 4.552818336   |
| H199  | -2.577063603  | 0.032013988  | 10.895841381  |
| H200  | -2.848548175  | -1.594866849 | 10.214489691  |
| H201  | -0.136906647  | -1.637836746 | 10.010402978  |
| H202  | 9.114890713   | -8.651671604 | 5.818250027   |
| H203  | -1.478396634  | -5.595275948 | -4.754685329  |
| H204  | 0.970381813   | -6.049189304 | -1.942873269  |
| H205  | -1.101826955  | -5.572793264 | -9.139036280  |
| H206  | 0.532588180   | -4.874754566 | -9.282480998  |
| H207  | -1.951698022  | -3.651001538 | -7.954532863  |
| H208  | -0.698779742  | 1.831277873  | -9.989252622  |
| H209  | -1.558011689  | -3.381236025 | -10.460310931 |
| H210  | -3.041129446  | -1.674654441 | -3.115973014  |
| H211  | -4.079962632  | -4.418989929 | -2.211420401  |
| H212  | -0.4711101715 | -0.392951831 | -8.746751815  |
| H213  | -3.092930878  | 0.689692535  | -9.572339608  |
| H214  | 0.833073670   | -1.850446130 | -9.655959649  |
| H215  | -1.351693975  | -5.522173737 | -3.000399501  |
| H216  | -0.345404555  | -2.969472179 | -7.683536676  |
| H217  | 0.746437285   | -3.163483874 | -10.642959286 |
| H218  | -6.316515761  | -2.490475942 | -4.460389270  |
| H219  | -3.498387610  | -1.914291264 | -1.443298704  |
| H220  | 1.852284567   | -4.963828877 | -7.591745794  |
| H221  | -2.445733834  | -3.937673469 | -1.788587407  |
| H222  | -4.217821031  | 2.888164556  | 2.485392658   |
| H223  | -3.456368675  | 0.806368093  | 1.042027134   |
| H224  | -8.748074039  | 1.571358282  | 2.055787144   |
| H225  | -7.359008595  | 0.730855759  | -0.456129095  |

|      |              |              |              |
|------|--------------|--------------|--------------|
| H226 | -6.765906334 | 4.831968987  | 1.044809602  |
| H227 | -8.074894690 | 9.488068583  | 3.139397606  |
| H228 | -7.345896032 | 5.771780174  | 4.052862414  |
| H229 | -8.837053125 | 6.308456995  | 1.787139300  |
| H230 | -5.972143868 | 7.440997690  | 1.858823641  |
| H231 | -9.866857910 | 10.717097954 | -0.497913256 |
| H232 | -3.010304747 | 4.464528024  | 0.984544948  |
| H233 | -4.351809336 | 4.451201912  | -0.167131494 |
| H234 | -9.154073999 | 11.413356502 | 1.855848806  |
| H235 | -7.897126161 | 6.570225856  | 0.319127145  |
| H236 | -6.086634770 | 2.626656825  | 0.240813805  |
| H237 | -7.715432223 | 0.143209090  | 1.927345943  |
| H238 | -9.384894537 | 3.058662320  | -2.184137122 |
| H239 | -1.696294167 | 1.359576190  | -2.732783828 |
| H240 | -9.911206627 | 1.368489425  | -2.275708070 |
| H241 | 9.634709896  | 1.692526876  | 5.235430966  |
| H242 | 8.174609079  | 2.006666075  | 4.569666596  |
| H243 | 2.354820418  | 5.727285897  | -0.572626922 |
| H244 | -0.279751057 | 5.499958375  | 0.563417760  |
| H245 | 2.406096268  | 7.703453502  | 1.292111683  |
| H246 | -2.584281799 | 3.660144436  | -1.937543613 |
| H247 | -3.905390929 | 4.791108957  | -3.405906086 |
| H248 | -5.126219087 | 4.232151134  | -5.197369805 |
| H249 | -3.709337838 | 5.955265411  | -2.350502842 |
| H250 | -4.263752986 | 1.983422087  | -4.871422404 |
| H251 | -6.020586032 | 2.196897774  | -5.166841468 |
| H252 | 1.573978117  | 11.585341814 | -1.012591992 |
| H253 | 0.540972723  | 13.027502886 | -0.970724943 |
| H254 | 0.880238941  | 10.265306241 | -2.644305345 |
| H255 | -0.816342359 | 9.936532758  | -2.992824157 |
| H256 | -1.255048028 | 9.819030728  | -5.903971534 |
| H257 | -0.799209551 | 5.366654017  | -5.779178018 |
| H258 | -6.083973064 | 9.471836230  | -1.409434905 |
| H259 | -2.566071242 | 8.756089812  | 2.033319004  |
| H260 | -3.117923835 | 8.327748711  | -3.287538266 |
| H261 | 2.412263576  | 5.328348666  | -3.083834773 |
| H262 | 3.694094639  | 6.955010023  | -2.018280999 |
| H263 | -0.127386491 | 5.090385223  | -3.187859316 |
| H264 | -7.847841814 | 0.783636971  | -3.161014208 |
| H265 | 5.471920589  | 9.642588248  | -2.463670601 |
| H266 | -5.282092694 | -0.119590546 | -4.237496777 |
| H267 | 2.351104220  | 6.427310467  | -4.457251112 |
| H268 | -2.628598399 | 7.318927179  | 0.036701516  |
| H269 | 4.818867134  | 9.885694551  | -0.830771738 |
| H270 | -0.509273721 | 8.355722985  | -6.451961662 |
| H271 | -3.141906578 | 9.599935110  | -4.459930381 |
| H272 | -4.684589852 | -2.788216307 | -4.665681310 |
| H273 | -5.776179085 | -2.716348654 | -2.222960988 |
| H274 | -5.936571656 | 11.005752631 | 0.531189832  |
| H275 | -4.651704011 | 1.988413326  | -2.425685949 |
| H276 | 1.172754653  | 8.137163018  | -3.089635843 |
| H277 | 0.301726735  | 6.746657132  | -5.710366408 |
| H278 | 0.835562451  | 4.433760322  | -4.500097405 |
| H279 | -2.065136938 | 6.377489078  | -3.869341497 |
| H280 | 1.050439518  | 8.609170885  | 3.702741436  |
| H281 | 0.549060009  | 9.692929138  | 0.707530399  |
| H282 | 1.187669973  | 12.477837383 | 1.256228292  |
| H283 | 2.722681987  | 8.942352206  | 3.192400695  |
| H284 | -1.650898376 | 10.741163010 | 1.866372123  |
| H285 | 6.106355631  | -3.068790296 | -8.152783735 |
| H286 | 5.728180900  | -4.559160801 | -7.270624448 |
| H287 | 8.103915218  | -5.857795252 | -3.595405506 |
| H288 | 6.533497271  | -5.176996991 | -9.409367851 |
| H289 | 4.913295607  | -5.397082317 | -9.498274832 |
| H290 | 5.911010926  | 4.091145721  | 0.753308321  |
| H291 | 6.281534333  | 6.631610105  | 2.342165022  |
| H292 | 6.264761715  | 7.545072365  | -1.828658019 |
| H293 | 4.545966013  | 5.121208857  | 1.290057526  |
| H294 | 7.600851593  | 7.124306658  | 1.506735969  |
| H295 | 6.904615248  | 2.475961507  | -5.160859557 |
| H296 | 6.913853307  | 5.991074734  | -0.452898381 |
| H297 | 3.281491299  | -7.725457959 | 5.406102789  |
| H298 | 5.385581784  | -8.815871634 | 3.460665094  |
| H299 | 5.070643745  | 1.259033319  | -5.725325663 |
| H300 | 4.113963531  | -0.736387826 | 4.230821769  |
| H301 | 2.532248150  | 1.879521967  | -8.151639548 |
| H302 | -0.579440964 | -1.908595058 | -4.471850807 |
| H303 | 2.075107332  | 2.345577799  | -6.508776316 |
| H304 | 2.748965009  | -5.138712928 | 4.903154788  |
| H305 | 3.390387531  | 0.142030198  | -5.855554977 |
| H306 | 3.777433844  | -5.497148419 | 3.173778512  |
| H307 | 3.129420497  | -7.882494122 | 3.639151965  |

|  |       |              |               |              |
|--|-------|--------------|---------------|--------------|
|  | H308  | 5.142790070  | -6.313451713  | 3.401982205  |
|  | H309  | 5.070907699  | -6.020794683  | 5.147479649  |
|  | H310  | -3.727584304 | 0.095837067   | -7.396672955 |
|  | H311  | 3.584009382  | -10.260101315 | 5.367698897  |
|  | H312  | 2.840641963  | -12.510478942 | 3.428649319  |
|  | H313  | 0.847991562  | -0.034840770  | -3.672123784 |
|  | H314  | 3.589739794  | -12.636941452 | 6.248820276  |
|  | H315  | 2.124379123  | -12.850904357 | 5.548474113  |
|  | H316  | 4.664169355  | -3.913381554  | 2.945632515  |
|  | H317  | 0.464435578  | 2.262371015   | -4.510510066 |
|  | H318  | -2.366287847 | -1.485820559  | -6.147695808 |
|  | H319  | 6.620606967  | -10.747457261 | -0.669176745 |
|  | H320  | 6.379046885  | -8.290883541  | -2.877068414 |
|  | H321  | 5.513158015  | -8.940055532  | 0.737366152  |
|  | H322  | 5.962913866  | -11.189025018 | -2.007049477 |
|  | H323  | 7.059594982  | 2.397896959   | -7.951627670 |
|  | H324  | 5.702344777  | -5.789797120  | 0.730355971  |
|  | H325  | 1.158443099  | -7.974697270  | 0.732263352  |
|  | H326  | 4.599835820  | -2.004382324  | -6.790108234 |
|  | H327  | 2.122085896  | -9.420624491  | -0.792403818 |
|  | H328  | 3.714161146  | -6.921402946  | -6.687147354 |
|  | H329  | 2.709403390  | -5.385716006  | -4.947593705 |
|  | H330  | 4.282285952  | -13.281428971 | 4.098951385  |
|  | H331  | 4.739628222  | -1.636796449  | 2.861733650  |
|  | H332  | 7.320076606  | -6.864514236  | 2.104660941  |
|  | H333  | 6.727825890  | -4.675163154  | 1.070174256  |
|  | H334  | 7.336217089  | -8.067255523  | 4.137400728  |
|  | H335  | 2.405751908  | -3.444357757  | 5.715057414  |
|  | H336  | 3.547632069  | -8.503371982  | -3.342914780 |
|  | H337  | 4.396504758  | -9.032003286  | -1.882656902 |
|  | H338  | 1.350549935  | -8.734572822  | -2.230083934 |
|  | H339  | 2.372284360  | -1.984450593  | -5.767122495 |
|  | H340  | -1.312133152 | 2.697583020   | -6.222104355 |
|  | H341  | -3.406944929 | 1.846977134   | -7.360217688 |
|  | H342  | 1.455948944  | -6.223315678  | 0.688167853  |
|  | H343  | 7.299275633  | -8.400826062  | 1.858970450  |
|  | H344  | 5.938524120  | -10.154216005 | 1.602411540  |
|  | H345  | 2.491377553  | -1.758102426  | 5.613878219  |
|  | H346  | 5.913009579  | -7.980524212  | -5.888486260 |
|  | H347  | 6.277784151  | -6.729443952  | -2.074679002 |
|  | H348  | 1.733807356  | -2.613766892  | -7.312362733 |
|  | H349  | 6.025608558  | 3.970746589   | -5.544971911 |
|  | H350  | 6.518345959  | -1.065099219  | 5.583539605  |
|  | H351  | 7.018690583  | -0.565374041  | 3.951356743  |
|  | H352  | 9.357325612  | -7.407918029  | -4.835234345 |
|  | H353  | 8.394608192  | -8.667166761  | -4.424973999 |
|  | H354  | 9.370029763  | -9.744522182  | -0.099900950 |
|  | H355  | 7.980914041  | -9.064869430  | -1.768158756 |
|  | H356  | 11.284538598 | -8.800683897  | -1.825421238 |
|  | H357  | 9.362214101  | -8.059875253  | 0.465939176  |
|  | H358  | 9.584235414  | -1.230898870  | 4.516972682  |
|  | H359  | -2.291049930 | 13.233489524  | 3.942275803  |
|  | H360  | 7.879366586  | -8.389091720  | 7.079853744  |
|  | H361  | 7.842559178  | -5.855787797  | 6.034465225  |
|  | H362  | -3.568896973 | 12.703081095  | 1.240091036  |
|  | H363  | -3.674708863 | 10.547492822  | 3.439448715  |
|  | H364  | -5.061920399 | 11.449858513  | 2.800881120  |
|  | H365  | -5.223217236 | 7.570913031   | -2.379819902 |
|  | Mo366 | 3.724066204  | -4.636983482  | -1.854641056 |
|  | N367  | -7.649881076 | -6.291366919  | -2.330464856 |
|  | N368  | -9.393556038 | -3.587709711  | -0.427471789 |
|  | N369  | -9.371733596 | -4.045893386  | 2.341446189  |
|  | N370  | -6.856621495 | -5.199645390  | 2.869319787  |
|  | N371  | -5.187644342 | -2.948041333  | 2.399321444  |
|  | N372  | -5.992744690 | -1.275387485  | 4.578260326  |
|  | N373  | -5.586599739 | -2.881801549  | 6.983315292  |
|  | N374  | -3.157976870 | -4.442670263  | 6.721429255  |
|  | N375  | -1.313641929 | -2.842499911  | 5.272418035  |
|  | N376  | -1.235664538 | 0.057595763   | 6.103140445  |
|  | N377  | -2.058626721 | -0.259671802  | 8.845985800  |
|  | N378  | 2.971814745  | -12.282651812 | 5.515560452  |
|  | N379  | 4.226252252  | -10.101339372 | 4.584888060  |
|  | N380  | 4.038230452  | -3.929865892  | 3.753344821  |
|  | N381  | 2.970065790  | -2.648198297  | 5.416753717  |
|  | N382  | 4.182677829  | -1.620011627  | 3.733731422  |
|  | N383  | 7.149939138  | -8.237953174  | 5.150527371  |
|  | N384  | -5.379184747 | -2.131591379  | -4.264745341 |
|  | N385  | -1.806404268 | -5.208220169  | -3.865299804 |
|  | N386  | -5.531012268 | 0.314612607   | -3.333378125 |
|  | N387  | -7.883825887 | 1.651411425   | -2.630991596 |
|  | N388  | -8.038352176 | 1.218706329   | 0.143565052  |
|  | N389  | -5.883000541 | 2.665076707   | 1.241662910  |

|      |              |               |               |
|------|--------------|---------------|---------------|
| N390 | -2.627541912 | 2.784617185   | -1.401482616  |
| N391 | -2.484171543 | 0.625567190   | -0.871931998  |
| N392 | -6.270099560 | 5.349333849   | 1.766413016   |
| N393 | -9.081006577 | 8.784454310   | 0.043076954   |
| N394 | -9.034187584 | 10.478570401  | 1.475119500   |
| N395 | 8.858264096  | 1.261312339   | 4.728301225   |
| N396 | 6.938838471  | 6.349567807   | 1.607929612   |
| N397 | 5.574595006  | 7.972181520   | -1.216421646  |
| N398 | 3.036347946  | 7.697433130   | -2.280332034  |
| N399 | -1.423969769 | 6.897563027   | -4.505860461  |
| N400 | -1.183215445 | 8.808315465   | -5.845401950  |
| N401 | -2.638454703 | 8.819299738   | -4.047181594  |
| N402 | 1.451196735  | 6.198900458   | -0.386489622  |
| N403 | 1.542896663  | 7.955695175   | 1.779540227   |
| N404 | 0.627614021  | 10.508804587  | 1.314797974   |
| N405 | -0.107880532 | 10.541271217  | -2.579723507  |
| N406 | -1.810199350 | 11.745466821  | 1.893251604   |
| N407 | 5.640917872  | -4.679079734  | -9.434438458  |
| N408 | 3.798919424  | -2.459257061  | -7.232941664  |
| N409 | 2.914727463  | 0.426334779   | -6.727152856  |
| N410 | 5.138909623  | 2.162446215   | -6.204508417  |
| N411 | 0.232271674  | -2.336181065  | -10.332797501 |
| N412 | -1.452036999 | -0.410662681  | -9.041467572  |
| N413 | 8.390767431  | -7.658591558  | -4.607771082  |
| N414 | 4.433931004  | -5.910750672  | -3.759866081  |
| N415 | 4.158037635  | -6.718611010  | -5.795456698  |
| N416 | 8.725834638  | -8.402513188  | -1.538939603  |
| N417 | 0.167295191  | 2.284234097   | -0.043976131  |
| N418 | 0.933720541  | 1.569976567   | -0.448850609  |
| O419 | -7.330511721 | -4.493470730  | -0.095046613  |
| O420 | -8.249315415 | -2.089136174  | 2.667836328   |
| O421 | -7.127425660 | -4.680248987  | 5.079998907   |
| O422 | -3.787192826 | -3.813459370  | 3.968430196   |
| O423 | -3.906479465 | -0.368062256  | 4.485047500   |
| O424 | -4.818481190 | -0.931465614  | 7.892315913   |
| O425 | -2.920023510 | -4.259849367  | 8.996091689   |
| O426 | 0.408786094  | -4.108939366  | 6.117893409   |
| O427 | 0.982666609  | -0.500364278  | 6.159033137   |
| O428 | -0.261272897 | 1.036431996   | 9.339434354   |
| O429 | -0.594746194 | -1.256543757  | 11.962601733  |
| O430 | 5.218960460  | -11.241027357 | 2.837571463   |
| O431 | 5.611949527  | -8.843064040  | 6.747975481   |
| O432 | 9.762775251  | -6.250112722  | 6.597607886   |
| O433 | -5.873779054 | -0.358768284  | -1.158204050  |
| O434 | -3.269785475 | -3.865799683  | -4.964021249  |
| O435 | -6.648577464 | 3.342826660   | -1.724638915  |
| O436 | -5.064194145 | 3.841048020   | -4.308013840  |
| O437 | -9.899100185 | 2.559344880   | 0.257719144   |
| O438 | -6.461328770 | 2.020004387   | 3.353540295   |
| O439 | -4.564418772 | 5.310884591   | 3.280090669   |
| O440 | -6.860581391 | 7.736199279   | 4.313218107   |
| O441 | 9.379980590  | -1.721223587  | 6.488863787   |
| O442 | 3.028335743  | 4.007826379   | 5.009688661   |
| O443 | 4.523521202  | 7.900091091   | 0.804212431   |
| O444 | 2.771522562  | 9.973269129   | -2.467121684  |
| O445 | -0.306041278 | 7.400810782   | -1.219484425  |
| O446 | -0.477300865 | 7.140979645   | 2.496569039   |
| O447 | 2.507957263  | 5.253253617   | 2.415639785   |
| O448 | 1.573144029  | 11.285377474  | 3.253818037   |
| O449 | -1.076313089 | 13.737230254  | 1.065448987   |
| O450 | -1.723891830 | 11.419257466  | -1.221331056  |
| O451 | -4.083314529 | 14.061778432  | 3.416560511   |
| O452 | -4.356814043 | 7.481413195   | -1.937569405  |
| O453 | 3.088705294  | -4.260416147  | -8.466040215  |
| O454 | 1.519990237  | -0.321731857  | -8.385549970  |
| O455 | 4.183166668  | 3.767427122   | -7.501450167  |
| O456 | 8.026111054  | 4.051383999   | -7.246904450  |
| O457 | -3.190709543 | -1.635420163  | -9.866096759  |
| O458 | -0.796879125 | -6.186588634  | -6.612916330  |
| O459 | 1.291000360  | -5.461506518  | -6.922074282  |
| O460 | -1.773629882 | 3.144501307   | -8.863398505  |
| O461 | 9.830633968  | -6.456109826  | -1.891159411  |
| O462 | 11.929779115 | -8.446543648  | 0.075304612   |
| O463 | -0.104287804 | -6.141711811  | -1.694415776  |
| O464 | -1.189341247 | -7.179134539  | -0.016294918  |
| O465 | 4.455725765  | -11.311016514 | -2.885710206  |
| O466 | 2.282617192  | -11.001363636 | -3.429751010  |
| O467 | 4.533456481  | -6.253270234  | -0.606323173  |
| O468 | 4.007764179  | -8.035000813  | 0.658915958   |
| O469 | 2.298416152  | -6.244012033  | -1.932121977  |
| O470 | 7.732667752  | -7.705013401  | 2.425603148   |
| O471 | 6.280227080  | -5.447910177  | 1.461343720   |

|                        |      |              |                              |              |
|------------------------|------|--------------|------------------------------|--------------|
|                        | O472 | -3.222008810 | 5.323477658                  | -2.923688858 |
|                        | O473 | 6.832760841  | -11.216386583                | -1.506896168 |
|                        | O474 | 6.292524680  | -9.531453593                 | 0.918016259  |
|                        | S475 | 4.361259907  | 4.584290648                  | -1.070032634 |
|                        | S476 | 2.824757274  | 1.779857396                  | -2.730016422 |
|                        | S477 | 2.441454672  | -3.286345267                 | -3.360129064 |
|                        | S478 | 3.511119626  | 1.251066926                  | 0.846046899  |
|                        | S479 | 0.707201882  | -1.215055038                 | -0.845792319 |
|                        | S480 | 5.044646204  | -0.769259912                 | -4.479807395 |
|                        | S481 | 2.920245311  | -3.732547945                 | 0.224338898  |
|                        | S482 | 6.210080376  | 1.284935418                  | -1.482396435 |
|                        | S483 | 5.873744908  | -3.626787986                 | -2.034592350 |
|                        | S484 | 6.059535062  | -1.642801215                 | 1.044342503  |
|                        | end  |              |                              |              |
| <b>core</b>            |      |              | <b>bm522bz22n2xdtc.car_3</b> |              |
| <b>2N2 dissociated</b> | C1   | -8.395818429 | -4.483043275                 | -0.714957140 |
| <b>35, S=1</b>         | C2   | -8.741051917 | -5.513539167                 | -1.797111970 |
|                        | C3   | -9.154137454 | -2.466957439                 | 0.470674458  |
|                        | C4   | -8.889807056 | -2.853278783                 | 1.923446025  |
|                        | C5   | -9.087262714 | -4.543059507                 | 3.677178135  |
|                        | C6   | -7.600246575 | -4.807208604                 | 3.937783120  |
|                        | C7   | -5.413180197 | -5.321516228                 | 2.976071899  |
|                        | C8   | -4.721151282 | -3.968915869                 | 3.157991832  |
|                        | C9   | -4.663933282 | -1.603470605                 | 2.537215628  |
|                        | C10  | -4.817628882 | -1.028615987                 | 3.952152463  |
|                        | C11  | -6.214234559 | -0.759029420                 | 5.916181723  |
|                        | C12  | -5.462954150 | -1.531390636                 | 7.010583725  |
|                        | C13  | -5.077769962 | -3.706310839                 | 8.067961583  |
|                        | C14  | -3.607563536 | -4.139161752                 | 7.970473510  |
|                        | C15  | -1.814599880 | -4.925012385                 | 6.477380723  |
|                        | C16  | -0.806791514 | -3.908567424                 | 5.936114296  |
|                        | C17  | -0.445977914 | -1.814785156                 | 4.692619708  |
|                        | C18  | -0.167894085 | -0.695657473                 | 5.713205674  |
|                        | C19  | -0.927177708 | -1.303756703                 | 3.321870801  |
|                        | C20  | -0.057828743 | -0.138852663                 | 2.838938099  |
|                        | C21  | -0.923410505 | -2.444336005                 | 2.297757130  |
|                        | C22  | -1.106733056 | 1.152404613                  | 7.051996736  |
|                        | C23  | -1.100054334 | 0.638703712                  | 8.504292657  |
|                        | C24  | -2.191432913 | 2.228960666                  | 6.802485647  |
|                        | C25  | -2.157075333 | 3.316573668                  | 7.883886492  |
|                        | C26  | -2.021547769 | 2.851735757                  | 5.411469343  |
|                        | C27  | -2.160564283 | -0.736060388                 | 10.204435968 |
|                        | C28  | -0.840407163 | -1.234775423                 | 10.752616258 |
|                        | C29  | 3.615825904  | -12.407348882                | 4.199677530  |
|                        | C30  | 4.443447354  | -11.184685757                | 3.812334761  |
|                        | C31  | 4.886406153  | -8.814437258                 | 4.437597776  |
|                        | C32  | 5.923377155  | -8.640117628                 | 5.563383369  |
|                        | C33  | 3.844793481  | -7.683383689                 | 4.459962675  |
|                        | C34  | 4.471868068  | -6.303027397                 | 4.273939142  |
|                        | C35  | 3.415800305  | -5.227342085                 | 4.036583682  |
|                        | C36  | 3.733536258  | -2.747715833                 | 4.303643980  |
|                        | C37  | 8.240313596  | -8.048796154                 | 6.091720296  |
|                        | C38  | 8.648380685  | -6.600492490                 | 6.244799155  |
|                        | C39  | -5.141985593 | -2.015904560                 | -2.815777744 |
|                        | C40  | -5.548555950 | -0.607756051                 | -2.334947343 |
|                        | C41  | -3.666810642 | -2.286316191                 | -2.463296658 |
|                        | C42  | -3.239587263 | -3.766995175                 | -2.532522937 |
|                        | C43  | -2.771561445 | -4.272269074                 | -3.898101618 |
|                        | C44  | -5.481758191 | 1.753915700                  | -3.117620872 |
|                        | C45  | -6.728298616 | 2.328298809                  | -2.438095955 |
|                        | C46  | -5.197706991 | 2.416446984                  | -4.473711462 |
|                        | C47  | -9.103585598 | 2.030417457                  | -1.934391251 |
|                        | C48  | -9.040043632 | 1.963252771                  | -0.403387224 |
|                        | C49  | -7.838441045 | 1.179356705                  | 1.580761369  |
|                        | C50  | -6.666325579 | 1.993177785                  | 2.133433043  |
|                        | C51  | -4.746374570 | 3.450144425                  | 1.706806897  |
|                        | C52  | -5.185874385 | 4.769731667                  | 2.359410879  |
|                        | C53  | -3.805733479 | 3.817615544                  | 0.548995597  |
|                        | C54  | -3.242341717 | 2.644201037                  | -0.177173174 |
|                        | C55  | -3.147673502 | 1.297327028                  | 0.118146278  |
|                        | C56  | -2.248619285 | 1.526746217                  | -1.818246412 |
|                        | C57  | -6.710063822 | 6.680590025                  | 2.117247940  |
|                        | C58  | -6.956328253 | 6.742625431                  | 3.623692319  |
|                        | C59  | -8.030131100 | 6.938162245                  | 1.349829856  |
|                        | C60  | -8.486754700 | 8.362297027                  | 1.231157482  |
|                        | C61  | -8.452423427 | 9.407927964                  | 2.133801593  |
|                        | C62  | -9.386667454 | 10.060045634                 | 0.232682015  |
|                        | C63  | 8.258094204  | 0.217381543                  | 5.552186071  |
|                        | C64  | 9.153771324  | -1.007146720                 | 5.519451569  |
|                        | C65  | 6.883021561  | -0.211344923                 | 4.982508872  |
|                        | C66  | 5.864803695  | 0.904386433                  | 5.010520570  |

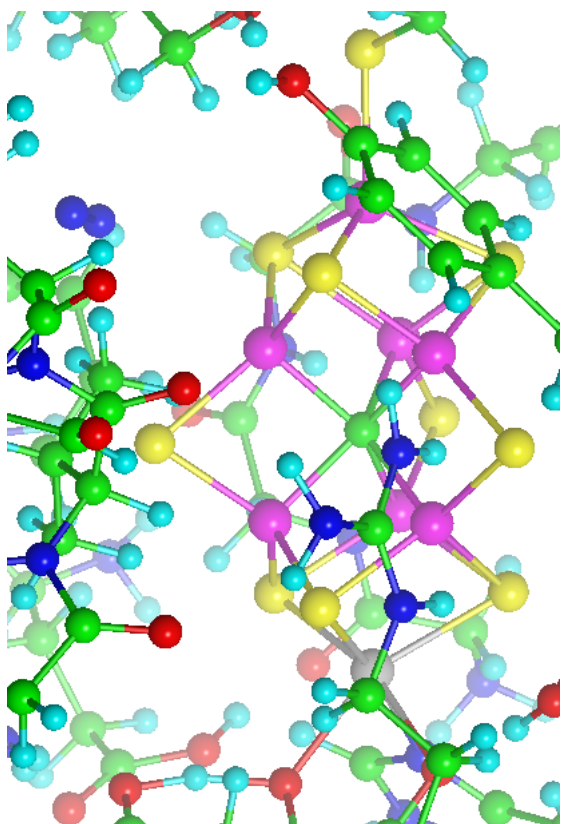

|       |               |               |              |
|-------|---------------|---------------|--------------|
| C67   | 5.048937960   | 1.119672895   | 6.137171157  |
| C68   | 5.702452424   | 1.762664526   | 3.906616978  |
| C69   | 4.097733170   | 2.145617222   | 6.163023147  |
| C70   | 4.767323106   | 2.798560168   | 3.923066428  |
| C71   | 3.960073507   | 2.984018797   | 5.050152660  |
| C72   | 6.188903662   | 6.175972220   | 0.352476838  |
| C73   | 5.349549138   | 7.418968600   | 0.012771750  |
| C74   | 5.281324119   | 4.954990310   | 0.487936673  |
| C75   | 4.883883185   | 9.172718876   | -1.662153460 |
| C76   | 3.455812464   | 8.972056125   | -2.176276944 |
| C77   | 1.674932808   | 7.286340475   | -2.613828111 |
| C78   | 0.851700951   | 6.960046999   | -1.340052542 |
| C79   | 1.785445776   | 6.081249192   | -3.576753871 |
| C80   | 0.509104570   | 5.370753246   | -4.041747405 |
| C81   | -0.340784377  | 6.096034560   | -5.097534412 |
| C82   | -1.744616241  | 8.144050380   | -4.816106376 |
| C83   | 0.741091142   | 5.852183402   | 0.843006059  |
| C84   | 0.526254939   | 7.056401806   | 1.771854296  |
| C85   | 1.457021529   | 4.751999940   | 1.657574551  |
| C86   | 1.681479689   | 8.921502945   | 2.858236671  |
| C87   | 1.301870755   | 10.348305775  | 2.501682739  |
| C88   | 0.418315967   | 11.840673272  | 0.798046509  |
| C89   | -0.899795056  | 12.518666758  | 1.250801404  |
| C90   | 0.585896446   | 11.950243896  | -0.721050040 |
| C91   | -0.526409863  | 11.271612311  | -1.510442836 |
| C92   | -3.157899092  | 12.219022735  | 2.146210575  |
| C93   | -3.166415894  | 13.263518181  | 3.252155342  |
| C94   | -4.075922944  | 11.026094384  | 2.536598149  |
| C95   | -4.212559907  | 10.025897285  | 1.411150770  |
| C96   | -5.204165253  | 10.190070246  | 0.433077003  |
| C97   | -3.317713325  | 8.951018866   | 1.270618689  |
| C98   | -5.285966253  | 9.333164066   | -0.667274291 |
| C99   | -3.362653931  | 8.104650967   | 0.159614774  |
| C100  | -4.347331457  | 8.309262522   | -0.802761465 |
| C101  | 5.464913683   | -3.966028876  | -8.176694024 |
| C102  | 4.011140562   | -3.565642072  | -7.983727026 |
| C103  | 2.486777928   | -1.959292230  | -6.860509407 |
| C104  | 2.255256080   | -0.540536169  | -7.391697482 |
| C105  | 2.847109715   | 1.825702050   | -7.090632502 |
| C106  | 4.125761208   | 2.650047633   | -6.956223010 |
| C107  | 6.313809887   | 2.979182953   | -5.944634206 |
| C108  | 7.191901277   | 3.175682796   | -7.164166561 |
| C109  | -1.034242068  | -2.744784051  | -9.727457093 |
| C110  | -1.982041276  | -1.550764371  | -9.561028732 |
| C111  | -0.947697964  | -3.540682450  | -8.405138142 |
| C112  | -0.351966253  | -4.942058676  | -8.637603627 |
| C113  | 0.009050180   | -5.596757854  | -7.324109149 |
| C114  | -2.262251204  | 0.768722212   | -8.832977289 |
| C115  | -1.502157567  | 2.011707909   | -9.250672658 |
| C116  | -2.928974715  | 0.855825106   | -7.438630377 |
| C117  | -1.944312984  | 0.629457872   | -6.322430335 |
| C118  | -1.147647394  | 1.682136178   | -5.838681504 |
| C119  | -1.743936932  | -0.662320711  | -5.807740241 |
| C120  | -0.154244115  | 1.437447755   | -4.887774074 |
| C121  | -0.747453300  | -0.905236532  | -4.858244345 |
| C122  | 0.059652505   | 0.142117003   | -4.405770391 |
| C123  | 7.984195850   | -6.936025891  | -3.392331713 |
| C124  | 8.909960592   | -7.233711954  | -2.203125978 |
| C125  | 6.515800996   | -7.207335958  | -3.030929726 |
| C126  | 5.496795191   | -6.784234097  | -4.040521798 |
| C127  | 5.330694326   | -7.282761546  | -5.316222918 |
| C128  | 3.643493472   | -5.935272526  | -4.832911838 |
| C129  | 9.581362955   | -8.710952522  | -0.400640309 |
| C130  | 11.050850260  | -8.624091810  | -0.750971436 |
| C131  | -0.133605051  | -6.838781359  | -0.533704802 |
| C132  | 1.238377548   | -7.099232087  | 0.082303130  |
| C133  | 2.380735568   | -7.300215295  | -0.955985048 |
| C134  | 2.262516217   | -8.703125904  | -1.610390861 |
| C135  | 3.463664348   | -9.143099622  | -2.449247222 |
| C136  | 3.384899033   | -10.603452434 | -2.949784780 |
| C137  | 3.733451579   | -7.215370091  | -0.226445505 |
| C138  | 3.858765666   | -1.068556948  | -1.403471389 |
| Fe139 | 4.355435008   | -2.264750961  | -2.990653459 |
| Fe140 | 2.498553842   | 0.259341244   | -1.029967512 |
| Fe141 | 4.984898309   | -0.045650868  | -0.135623307 |
| Fe142 | 4.556628788   | 0.288211715   | -2.702450174 |
| Fe143 | 4.188226940   | 2.311888424   | -0.977055744 |
| Fe144 | 4.750374102   | -2.581731895  | -0.461301878 |
| Fe145 | 2.369989819   | -2.313720557  | -1.381059275 |
| H146  | -7.117721409  | -6.722033638  | -1.550659527 |
| H147  | -6.965174753  | -5.674708852  | -2.792458042 |
| H148  | -10.208421530 | -3.562023107  | -1.027050506 |

|      |               |              |               |
|------|---------------|--------------|---------------|
| H149 | -9.256001464  | -5.001313453 | -2.625424702  |
| H150 | -9.486303496  | -6.196003375 | -1.352723332  |
| H151 | -8.286747977  | -1.875275780 | 0.140767861   |
| H152 | -9.881993132  | -4.628336562 | 1.678527530   |
| H153 | -10.036824539 | -1.813470636 | 0.443028859   |
| H154 | -9.642993276  | -5.478379660 | 3.826741217   |
| H155 | -7.271272033  | -5.183622230 | 1.935367416   |
| H156 | -9.417333389  | -3.822621434 | 4.437460082   |
| H157 | -3.594893352  | -1.584631196 | 2.294210937   |
| H158 | -5.926248169  | -3.132400578 | 1.719034591   |
| H159 | -5.036313955  | -5.799507812 | 2.061669366   |
| H160 | -5.884041742  | 0.285623949  | 5.973639795   |
| H161 | -6.763313100  | -1.703106575 | 4.056365900   |
| H162 | -5.138917698  | -5.946769843 | 3.834458547   |
| H163 | -5.186211850  | -0.964957374 | 1.811542963   |
| H164 | -6.162525015  | -3.329684830 | 6.258935764   |
| H165 | -7.292005894  | -0.798563687 | 6.128305808   |
| H166 | -1.539877643  | -3.294361870 | 2.624309285   |
| H167 | -1.302119663  | -2.087499027 | 1.328677381   |
| H168 | 0.103061354   | -2.804385621 | 2.124839434   |
| H169 | -1.954188473  | -0.927002998 | 3.449785362   |
| H170 | -5.689857270  | -4.617989249 | 8.125210627   |
| H171 | -2.064503461  | 2.100357263  | 4.610982611   |
| H172 | -2.819551484  | -0.499266537 | 8.198503405   |
| H173 | -2.343527636  | 2.913429187  | 8.889920359   |
| H174 | -0.419968905  | 0.207108755  | 1.863430089   |
| H175 | 0.991530572   | -0.443946138 | 2.702807525   |
| H176 | 8.113863744   | 0.497633704  | 6.614308446   |
| H177 | -2.816153452  | 3.588392061  | 5.223319478   |
| H178 | -2.926444288  | 4.073723326  | 7.673667039   |
| H179 | -1.051486205  | 3.371198525  | 5.342009079   |
| H180 | -1.177482682  | 3.820921767  | 7.897535884   |
| H181 | -3.176258969  | 1.728363700  | 6.845694248   |
| H182 | -0.113519992  | 1.603676486  | 6.910413561   |
| H183 | -2.144795020  | -0.118252834 | 5.659312757   |
| H184 | -0.082153643  | 0.717581668  | 3.529034532   |
| H185 | 1.845798786   | 3.985890621  | 0.967108207   |
| H186 | 0.698708893   | 4.286030387  | 2.304026405   |
| H187 | 2.565852030   | 4.804846853  | 3.287323718   |
| H188 | 2.489123025   | 3.992215013  | 5.814526947   |
| H189 | 4.632952258   | 3.441671025  | 3.053727996   |
| H190 | 6.295928926   | 1.598822235  | 3.004513025   |
| H191 | 5.143106703   | 0.463243680  | 7.006776247   |
| H192 | -2.305991187  | -2.828640345 | 5.034139533   |
| H193 | -1.850426765  | -5.763586918 | 5.765056231   |
| H194 | -1.404639382  | -5.299860625 | 7.422967340   |
| H195 | -3.770505875  | -4.313926977 | 5.910714787   |
| H196 | -5.178377294  | -3.162984811 | 9.015750731   |
| H197 | 3.455500979   | 2.283122357  | 7.036189240   |
| H198 | 0.531877086   | -2.290992622 | 4.544384012   |
| H199 | -2.568220859  | 0.027156184  | 10.887290243  |
| H200 | -2.846558079  | -1.598160326 | 10.205794372  |
| H201 | -0.133570595  | -1.645182527 | 9.995186273   |
| H202 | 9.120336654   | -8.651304398 | 5.818953099   |
| H203 | -1.478937321  | -5.596809935 | -4.767900949  |
| H204 | 0.957080711   | -6.038230263 | -1.925969552  |
| H205 | -1.098693849  | -5.572811516 | -9.141030743  |
| H206 | 0.537119413   | -4.876915795 | -9.282422340  |
| H207 | -1.947824834  | -3.650501559 | -7.957177995  |
| H208 | -0.691164809  | 1.830036744  | -9.994083162  |
| H209 | -1.550832945  | -3.381555987 | -10.462380717 |
| H210 | -3.029119379  | -1.672455361 | -3.117280073  |
| H211 | -4.076401956  | -4.416272056 | -2.218229663  |
| H212 | -0.461598490  | -0.395100434 | -8.746868394  |
| H213 | -3.080843655  | 0.689334991  | -9.576528048  |
| H214 | 0.841135131   | -1.851806831 | -9.656868817  |
| H215 | -1.351444094  | -5.523367628 | -3.011917833  |
| H216 | -0.340779004  | -2.970870154 | -7.684079895  |
| H217 | 0.754086856   | -3.166243644 | -10.641587055 |
| H218 | -6.312722030  | -2.486653987 | -4.453506527  |
| H219 | -3.486307701  | -1.916277676 | -1.445338522  |
| H220 | 1.853144912   | -4.964272330 | -7.586175978  |
| H221 | -2.438268161  | -3.941613233 | -1.799102559  |
| H222 | -4.212398580  | 2.882087895  | 2.481242753   |
| H223 | -3.477822682  | 0.793625915  | 1.022840917   |
| H224 | -8.748467698  | 1.569462821  | 2.057350106   |
| H225 | -7.359255635  | 0.732701696  | -0.457604378  |
| H226 | -6.757927084  | 4.830810819  | 1.042586958   |
| H227 | -8.066149092  | 9.490266549  | 3.143359606   |
| H228 | -7.323242988  | 5.781539361  | 4.058115961   |
| H229 | -8.823238923  | 6.309430724  | 1.793541150   |
| H230 | -5.955035748  | 7.436071054  | 1.848448935   |

|      |              |               |              |
|------|--------------|---------------|--------------|
| H231 | -9.863462427 | 10.714877294  | -0.493235345 |
| H232 | -2.998839099 | 4.437789640   | 0.974181479  |
| H233 | -4.355546111 | 4.456035172   | -0.162125426 |
| H234 | -9.151031329 | 11.412807545  | 1.860709924  |
| H235 | -7.889681516 | 6.571460271   | 0.320864020  |
| H236 | -6.088896953 | 2.623968395   | 0.240283354  |
| H237 | -7.715452703 | 0.141300966   | 1.925191964  |
| H238 | -9.384942586 | 3.063415355   | -2.182312477 |
| H239 | -1.730254094 | 1.349636020   | -2.756400865 |
| H240 | -9.916217727 | 1.374748954   | -2.274716444 |
| H241 | 9.638971525  | 1.698647852   | 5.233604185  |
| H242 | 8.178144865  | 2.009930840   | 4.566155833  |
| H243 | 2.363879786  | 5.729136518   | -0.573975350 |
| H244 | -0.262003993 | 5.489970287   | 0.576192578  |
| H245 | 2.410267917  | 7.709135441   | 1.294276477  |
| H246 | -2.598491370 | 3.657407835   | -1.947479343 |
| H247 | -3.901382595 | 4.788320247   | -3.406659268 |
| H248 | -5.121913154 | 4.232668488   | -5.201652021 |
| H249 | -3.701181739 | 5.950678182   | -2.349033415 |
| H250 | -4.266558673 | 1.980588572   | -4.873630589 |
| H251 | -6.021987286 | 2.201393255   | -5.172543257 |
| H252 | 1.577328905  | 11.576666220  | -1.011833601 |
| H253 | 0.549715489  | 13.023116657  | -0.968045690 |
| H254 | 0.878612181  | 10.266579881  | -2.650735439 |
| H255 | -0.820524801 | 9.945353592   | -2.998293084 |
| H256 | -1.255481141 | 9.810185212   | -5.911195071 |
| H257 | -0.798362397 | 5.360347336   | -5.776845818 |
| H258 | -6.076110226 | 9.466714926   | -1.410805883 |
| H259 | -2.562340781 | 8.750710582   | 2.035308939  |
| H260 | -3.110036793 | 8.325982680   | -3.283349573 |
| H261 | 2.415805251  | 5.324009252   | -3.083415507 |
| H262 | 3.693634215  | 6.951177531   | -2.015698488 |
| H263 | -0.122662960 | 5.082241393   | -3.186786974 |
| H264 | -7.852665604 | 0.783617097   | -3.160048578 |
| H265 | 5.468373463  | 9.646395618   | -2.461962956 |
| H266 | -5.281904423 | -0.118664833  | -4.239572966 |
| H267 | 2.353882535  | 6.421671426   | -4.458241473 |
| H268 | -2.621948452 | 7.313593849   | 0.037717955  |
| H269 | 4.810973974  | 9.888006630   | -0.830076076 |
| H270 | -0.511733549 | 8.342977962   | -6.456823043 |
| H271 | -3.139000104 | 9.595497990   | -4.460962608 |
| H272 | -4.681132179 | -2.786743085  | -4.666745183 |
| H273 | -5.763312234 | -2.712340412  | -2.219996010 |
| H274 | -5.930699401 | 11.000630860  | 0.529141213  |
| H275 | -4.658269948 | 1.992480787   | -2.430305820 |
| H276 | 1.172445947  | 8.132308052   | -3.093657237 |
| H277 | 0.304882261  | 6.739511887   | -5.709709593 |
| H278 | 0.838448417  | 4.427337913   | -4.500569676 |
| H279 | -2.059201429 | 6.373369129   | -3.864685750 |
| H280 | 1.053214558  | 8.609345423   | 3.706249286  |
| H281 | 0.556041070  | 9.687958207   | 0.714812515  |
| H282 | 1.193419578  | 12.474961079  | 1.257094346  |
| H283 | 2.726145710  | 8.940994322   | 3.196577521  |
| H284 | -1.643990199 | 10.734608526  | 1.868620193  |
| H285 | 6.106372075  | -3.071634172  | -8.162803383 |
| H286 | 5.729584375  | -4.562067709  | -7.278007018 |
| H287 | 8.112308493  | -5.863304724  | -3.597110442 |
| H288 | 6.531599171  | -5.177958261  | -9.420058845 |
| H289 | 4.910250328  | -5.403780257  | -9.502771467 |
| H290 | 5.909917545  | 4.090709945   | 0.738677718  |
| H291 | 6.284829547  | 6.630143741   | 2.342408683  |
| H292 | 6.261594239  | 7.546879466   | -1.829136043 |
| H293 | 4.550480883  | 5.122841446   | 1.291729926  |
| H294 | 7.599289611  | 7.130360047   | 1.505149925  |
| H295 | 6.921669527  | 2.468716045   | -5.180147903 |
| H296 | 6.913762934  | 5.992238046   | -0.455583547 |
| H297 | 3.286018261  | -7.728153644  | 5.409445971  |
| H298 | 5.389884619  | -8.818292735  | 3.462629165  |
| H299 | 5.084985827  | 1.248022036   | -5.738202535 |
| H300 | 4.112573120  | -0.736566832  | 4.226495545  |
| H301 | 2.528397089  | 1.876062175   | -8.139125753 |
| H302 | -0.596349355 | -1.913509424  | -4.466448311 |
| H303 | 2.077381770  | 2.346589137   | -6.495715087 |
| H304 | 2.753332227  | -5.139194997  | 4.906100734  |
| H305 | 3.387651259  | 0.141672341   | -5.839622286 |
| H306 | 2.781349732  | -5.501664604  | 3.176807586  |
| H307 | 3.134147842  | -7.884319840  | 3.642330664  |
| H308 | 5.149241192  | -6.315207611  | 3.407531031  |
| H309 | 5.073531743  | -6.022498098  | 5.152915725  |
| H310 | -3.724768910 | 0.097763044   | -7.405168219 |
| H311 | 3.586826421  | -10.263144690 | 5.369231284  |
| H312 | 2.840825400  | -12.510149515 | 3.424904433  |



|       |              |               |              |
|-------|--------------|---------------|--------------|
| H313  | 0.832363040  | -0.039416356  | -3.658680866 |
| H314  | 3.587830210  | -12.642702558 | 6.245388500  |
| H315  | 2.121928490  | -12.851482080 | 5.543196245  |
| H316  | 4.672707700  | -3.916935800  | 2.948010676  |
| H317  | 0.461815340  | 2.253938125   | -4.505465287 |
| H318  | -2.374039136 | -1.487208465  | -6.149304093 |
| H319  | 6.623923897  | -10.751908463 | -0.669456877 |
| H320  | 6.385329210  | -8.289841777  | -2.862028836 |
| H321  | 5.514297185  | -8.945572844  | 0.739055973  |
| H322  | 5.967490512  | -11.188499282 | -2.009668207 |
| H323  | 7.047633917  | 2.422671017   | -7.975638791 |
| H324  | 5.708584608  | -5.784802553  | 0.736798003  |
| H325  | 1.176941774  | -7.958231823  | 0.760387700  |
| H326  | 4.602697521  | -2.013132953  | -6.781286871 |
| H327  | 2.118363315  | -9.420383410  | -0.788036944 |
| H328  | 3.723169675  | -6.934970614  | -6.688958057 |
| H329  | 2.705420050  | -5.409011168  | -4.948539478 |
| H330  | 4.282392666  | -13.281873242 | 4.097148406  |
| H331  | 4.741591434  | -1.638439217  | 2.858170847  |
| H332  | 7.325319795  | -6.865896261  | 2.106760470  |
| H333  | 6.723486624  | -4.662867679  | 1.080112246  |
| H334  | 7.339622039  | -8.072746795  | 4.138191858  |
| H335  | 2.402909832  | -3.447255396  | 5.710841683  |
| H336  | 3.543717859  | -8.497901756  | -3.337253032 |
| H337  | 4.393866008  | -9.025051580  | -1.877575837 |
| H338  | 1.349252882  | -8.729506360  | -2.222566510 |
| H339  | 2.384318831  | -1.990195504  | -5.764346514 |
| H340  | -1.304682124 | 2.692958475   | -6.224582322 |
| H341  | -3.400031624 | 1.848578541   | -7.367582278 |
| H342  | 1.468022723  | -6.212448782  | 0.696795486  |
| H343  | 7.302038266  | -8.402760693  | 1.858703319  |
| H344  | 5.942864381  | -10.158439980 | 1.602736611  |
| H345  | 2.490389425  | -1.758718827  | 5.609897891  |
| H346  | 5.926159458  | -7.982881961  | -5.889001520 |
| H347  | 6.285732134  | -6.721343860  | -2.074955796 |
| H348  | 1.735352122  | -2.613474645  | -7.308858602 |
| H349  | 6.029768292  | 3.963304181   | -5.541290582 |
| H350  | 6.524735346  | -1.063203536  | 5.580264947  |
| H351  | 7.027750755  | -0.563288088  | 3.948532539  |
| H352  | 9.362700230  | -7.420229529  | -4.832952553 |
| H353  | 8.395228908  | -8.675721472  | -4.421470244 |
| H354  | 9.378799586  | -9.752469184  | -0.102576314 |
| H355  | 7.988159314  | -9.070971008  | -1.768639587 |
| H356  | 11.290025287 | -8.802765547  | -1.827427889 |
| H357  | 9.368785347  | -8.069293677  | 0.469121329  |
| H358  | 9.588699032  | -1.226081001  | 4.513701781  |
| H359  | -2.287972812 | 13.232558156  | 3.938961737  |
| H360  | 7.885722434  | -8.389960395  | 7.080951891  |
| H361  | 7.841296845  | -5.858098920  | 6.032851355  |
| H362  | -3.560709102 | 12.694685577  | 1.236233260  |
| H363  | -3.671505793 | 10.543100786  | 3.440139766  |
| H364  | -5.057404486 | 11.446368872  | 2.799061086  |
| H365  | -5.214965788 | 7.565551758   | -2.380335288 |
| Mo366 | 3.731979007  | -4.656122038  | -1.866342251 |
| N367  | -7.632699669 | -6.291707446  | -2.322920008 |
| N368  | -9.385958943 | -3.587581793  | -0.428873158 |
| N369  | -9.373702580 | -4.047358970  | 2.340893017  |
| N370  | -6.859927994 | -5.203264647  | 2.871180729  |
| N371  | -5.189777122 | -2.953278531  | 2.398240381  |
| N372  | -5.993180084 | -1.277967539  | 4.576436541  |
| N373  | -5.592161939 | -2.884002412  | 6.982670301  |
| N374  | -3.159494078 | -4.437382418  | 6.721624702  |
| N375  | -1.311752869 | -2.844083782  | 5.262901011  |
| N376  | -1.233740259 | 0.055823060   | 6.091576593  |
| N377  | -2.056034375 | -0.264623599  | 8.835942466  |
| N378  | 2.970093956  | -12.283265558 | 5.513822344  |
| N379  | 4.229173211  | -10.103083201 | 4.586239489  |
| N380  | 4.043233172  | -3.932464705  | 3.753938216  |
| N381  | 2.968903766  | -2.650239847  | 5.415041227  |
| N382  | 4.194096541  | -1.623414383  | 3.737169251  |
| N383  | 7.154024489  | -8.242683516  | 5.151650342  |
| N384  | -5.373529867 | -2.128726021  | -4.264140860 |
| N385  | -1.806395705 | -5.210748038  | -3.877294247 |
| N386  | -5.532268889 | 0.315814043   | -3.335638100 |
| N387  | -7.887169344 | 1.652942723   | -2.631730860 |
| N388  | -8.038701375 | 1.220510801   | 0.142962655  |
| N389  | -5.884366873 | 2.663241864   | 1.241428554  |
| N390  | -2.666755564 | 2.774042713   | -1.425721565 |
| N391  | -2.537740016 | 0.611624918   | -0.905243587 |
| N392  | -6.263158738 | 5.345208290   | 1.767425487  |
| N393  | -9.072500371 | 8.783795895   | 0.047233937  |
| N394  | -9.028844438 | 10.477936534  | 1.479840323  |

|      |              |               |               |
|------|--------------|---------------|---------------|
| N395 | 8.863404725  | 1.265842964   | 4.725856689   |
| N396 | 6.941184215  | 6.352091021   | 1.605634870   |
| N397 | 5.575979982  | 7.978050250   | -1.214127826  |
| N398 | 3.037993949  | 7.694730209   | -2.283487017  |
| N399 | -1.419549744 | 6.892744756   | -4.503371811  |
| N400 | -1.183411576 | 8.799346442   | -5.849974857  |
| N401 | -2.633430569 | 8.816632556   | -4.046159035  |
| N402 | 1.459063989  | 6.200038884   | -0.385428802  |
| N403 | 1.545384814  | 7.961993078   | 1.779218521   |
| N404 | 0.633531023  | 10.506352294  | 1.319590900   |
| N405 | -0.109046566 | 10.545553984  | -2.583328737  |
| N406 | -1.803668115 | 11.739258125  | 1.896731643   |
| N407 | 5.636655237  | -4.683180012  | -9.444488448  |
| N408 | 3.803099697  | -2.458669551  | -7.240809837  |
| N409 | 2.914865581  | 0.424729998   | -6.712982771  |
| N410 | 5.146628618  | 2.156217562   | -6.211451008  |
| N411 | 0.240372115  | -2.337768448  | -10.333678971 |
| N412 | -1.442822386 | -0.411955636  | -9.041775676  |
| N413 | 8.394970458  | -7.667383240  | -4.606059040  |
| N414 | 4.431675255  | -5.929293627  | -3.757549909  |
| N415 | 4.161975303  | -6.733613468  | -5.794360321  |
| N416 | 8.731683297  | -8.407075513  | -1.538391369  |
| N417 | -0.282096041 | 2.451376983   | 0.624615972   |
| N418 | 0.144983663  | 2.333501543   | -0.394771772  |
| O419 | -7.318867317 | -4.484931730  | -0.092794466  |
| O420 | -8.252738531 | -2.089561027  | 2.669355729   |
| O421 | -7.132777867 | -4.682901664  | 5.082224289   |
| O422 | -3.788578895 | -3.818502109  | 3.967740037   |
| O423 | -3.904882172 | -0.374938639  | 4.481614145   |
| O424 | -4.819666847 | -0.935274545  | 7.891221390   |
| O425 | -2.925377769 | -4.260584807  | 8.998264011   |
| O426 | 0.408553978  | -4.109196702  | 6.114244567   |
| O427 | 0.983965782  | -0.501872970  | 6.148479607   |
| O428 | -0.258401768 | 1.030573890   | 9.329821535   |
| O429 | -0.589460556 | -1.270994808  | 11.949082388  |
| O430 | 5.220829935  | -11.242569369 | 2.836771710   |
| O431 | 5.616936547  | -8.847157852  | 6.750607602   |
| O432 | 9.764088373  | -6.247165621  | 6.592897008   |
| O433 | -5.871189984 | -0.356668929  | -1.159055025  |
| O434 | -3.270305673 | -3.864433772  | -4.973126377  |
| O435 | -6.651138799 | 3.345188681   | -1.727627395  |
| O436 | -5.060211369 | 3.841839577   | -4.312048132  |
| O437 | -9.899483322 | 2.562250581   | 0.260309469   |
| O438 | -6.461928900 | 2.018858594   | 3.354448318   |
| O439 | -4.556269217 | 5.301751245   | 3.280246077   |
| O440 | -6.837041518 | 7.747122689   | 4.306266994   |
| O441 | 9.387554745  | -1.716922832  | 6.486914534   |
| O442 | 3.030064743  | 4.004140856   | 5.003501885   |
| O443 | 4.519883363  | 7.899028583   | 0.804180394   |
| O444 | 2.767477401  | 9.970481731   | -2.469550237  |
| O445 | -0.303931356 | 7.396397162   | -1.219038926  |
| O446 | -0.475957706 | 7.145257873   | 2.492068055   |
| O447 | 2.518553130  | 5.301012839   | 2.444721264   |
| O448 | 1.579908784  | 11.288337220  | 3.257525883   |
| O449 | -1.071241092 | 13.732912802  | 1.069908319   |
| O450 | -1.721869027 | 11.419652734  | -1.217147962  |
| O451 | -4.079822011 | 14.059133333  | 3.409189318   |
| O452 | -4.349036561 | 7.475738644   | -1.937225861  |
| O453 | 3.086426522  | -4.265028540  | -8.465159408  |
| O454 | 1.533364829  | -0.320143011  | -8.386472883  |
| O455 | 4.176789634  | 3.770572604   | -7.490153193  |
| O456 | 8.026548081  | 4.061109139   | -7.254128017  |
| O457 | -3.182630666 | -1.634270217  | -9.870078584  |
| O458 | -0.799686651 | -6.188367833  | -6.616313137  |
| O459 | 1.289073413  | -5.460963154  | -6.917338962  |
| O460 | -1.761631917 | 3.143198788   | -8.865008011  |
| O461 | 9.835880147  | -6.459447875  | -1.889465446  |
| O462 | 11.936795434 | -8.451736229  | 0.074698559   |
| O463 | -0.111653181 | -6.136890804  | -1.669607764  |
| O464 | -1.183170203 | -7.195850324  | 0.000372064   |
| O465 | 4.459365518  | -11.300226108 | -2.892310489  |
| O466 | 2.277750250  | -11.001511684 | -3.411060233  |
| O467 | 4.545139923  | -6.264937523  | -0.607331581  |
| O468 | 4.018664415  | -8.034759409  | 0.668565211   |
| O469 | 2.292474466  | -6.245334173  | -1.922121262  |
| O470 | 7.735424816  | -7.708340577  | 2.427049128   |
| O471 | 6.287395726  | -5.444623832  | 1.467886295   |
| O472 | -3.215982166 | 5.316192515   | -2.921831554  |
| O473 | 6.836231729  | -11.220414607 | -1.507788166  |
| O474 | 6.294778627  | -9.534462723  | 0.917386364   |
| S475 | 4.355588973  | 4.596584562   | -1.073682023  |
| S476 | 2.795244924  | 1.733455905   | -2.697177892  |

|                                                                                    |              |                          |               |              |
|------------------------------------------------------------------------------------|--------------|--------------------------|---------------|--------------|
|                                                                                    | S477         | 2.410437135              | -3.331262161  | -3.348094489 |
|                                                                                    | S478         | 3.378309351              | 1.246487244   | 0.817360894  |
|                                                                                    | S479         | 0.728463382              | -1.039724840  | -0.937179318 |
|                                                                                    | S480         | 5.133940263              | -0.857241798  | -4.527669992 |
|                                                                                    | S481         | 2.954488097              | -3.720217098  | 0.199255886  |
|                                                                                    | S482         | 6.186743593              | 1.270313337   | -1.434477382 |
|                                                                                    | S483         | 5.865728826              | -3.638786606  | -2.068609040 |
|                                                                                    | S484         | 6.024210739              | -1.607846011  | 1.031974588  |
|                                                                                    | end          |                          |               |              |
| <b>core</b><br><b>2N2 TS</b><br><b>35, S=1</b>                                     |              | <b>bm522bz22n2xdtb_1</b> |               |              |
| 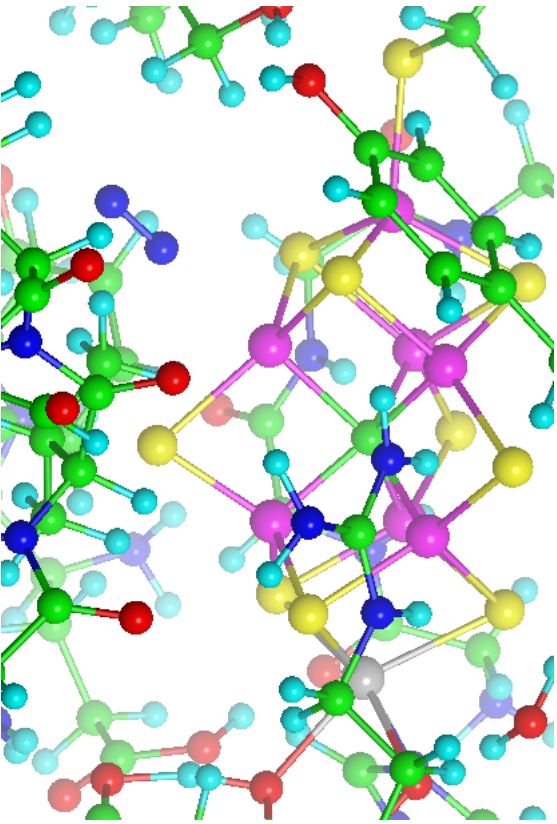 | C1           | -8.408782440             | -4.489001107  | -0.722540719 |
|                                                                                    | C2           | -8.776663634             | -5.510920423  | -1.805228115 |
|                                                                                    | C3           | -9.130728391             | -2.464084848  | 0.470205144  |
|                                                                                    | C4           | -8.879878173             | -2.846530334  | 1.926215707  |
|                                                                                    | C5           | -9.072129622             | -4.539491231  | 3.676908699  |
|                                                                                    | C6           | -7.583787356             | -4.801437550  | 3.933415440  |
|                                                                                    | C7           | -5.397346517             | -5.304038944  | 2.965719845  |
|                                                                                    | C8           | -4.709706412             | -3.950867401  | 3.157210256  |
|                                                                                    | C9           | -4.655963572             | -1.581966325  | 2.542358415  |
|                                                                                    | C10          | -4.812492466             | -1.013970252  | 3.959878804  |
|                                                                                    | C11          | -6.208976507             | -0.750155844  | 5.922402932  |
|                                                                                    | C12          | -5.451819831             | -1.517760430  | 7.016101910  |
|                                                                                    | C13          | -5.052702661             | -3.692747974  | 8.069436533  |
|                                                                                    | C14          | -3.588447314             | -4.144082682  | 7.970178107  |
|                                                                                    | C15          | -1.799419473             | -4.939632800  | 6.476703569  |
|                                                                                    | C16          | -0.793596695             | -3.910427107  | 5.953552893  |
|                                                                                    | C17          | -0.444603106             | -1.811591751  | 4.715302535  |
|                                                                                    | C18          | -0.163357109             | -0.699930165  | 5.741397613  |
|                                                                                    | C19          | -0.935460497             | -1.288527047  | 3.351908881  |
|                                                                                    | C20          | -0.081471353             | -0.106157943  | 2.879850211  |
|                                                                                    | C21          | -0.922859113             | -2.415678407  | 2.313683858  |
|                                                                                    | C22          | -1.098084354             | 1.154727029   | 7.069783248  |
|                                                                                    | C23          | -1.095483670             | 0.648221962   | 8.523291635  |
|                                                                                    | C24          | -2.179458271             | 2.231784104   | 6.809967315  |
|                                                                                    | C25          | -2.145394663             | 3.326960557   | 7.882675484  |
|                                                                                    | C26          | -2.003501481             | 2.841639827   | 5.413476282  |
|                                                                                    | C27          | -2.163108803             | -0.720116482  | 10.221900222 |
|                                                                                    | C28          | -0.849830025             | -1.211519415  | 10.792893974 |
|                                                                                    | C29          | 3.617242262              | -12.403809936 | 4.209777257  |
|                                                                                    | C30          | 4.444540308              | -11.182242905 | 3.817610166  |
|                                                                                    | C31          | 4.876272603              | -8.805550304  | 4.429516344  |
|                                                                                    | C32          | 5.910046701              | -8.630720153  | 5.558475783  |
|                                                                                    | C33          | 3.833626354              | -7.675235607  | 4.447521814  |
|                                                                                    | C34          | 4.458520679              | -6.294630197  | 4.256114395  |
|                                                                                    | C35          | 3.399002549              | -5.220508880  | 4.027276473  |
|                                                                                    | C36          | 3.731855626              | -2.742662567  | 4.290679686  |
|                                                                                    | C37          | 8.226421160              | -8.050718690  | 6.096579892  |
|                                                                                    | C38          | 8.650344301              | -6.608310052  | 6.258563186  |
|                                                                                    | C39          | -5.153852994             | -2.019685895  | -2.817613588 |
|                                                                                    | C40          | -5.555089183             | -0.611054161  | -2.336187246 |
|                                                                                    | C41          | -3.677312903             | -2.285877439  | -2.459504736 |
|                                                                                    | C42          | -3.247342852             | -3.766120144  | -2.513379803 |
|                                                                                    | C43          | -2.766355803             | -4.277642368  | -3.871202274 |
|                                                                                    | C44          | -5.477741660             | 1.753638327   | -3.108449372 |
|                                                                                    | C45          | -6.728793896             | 2.321575497   | -2.429983594 |
|                                                                                    | C46          | -5.197268612             | 2.421293589   | -4.462841132 |
|                                                                                    | C47          | -9.105740588             | 2.010722348   | -1.936093903 |
| C48                                                                                | -9.043538560 | 1.948914422              | -0.404797828  |              |
| C49                                                                                | -7.837552751 | 1.179926740              | 1.582367063   |              |
| C50                                                                                | -6.664576417 | 1.996284108              | 2.130268176   |              |
| C51                                                                                | -4.748991888 | 3.458314999              | 1.697502646   |              |
| C52                                                                                | -5.194752703 | 4.776760724              | 2.348614634   |              |
| C53                                                                                | -3.808345760 | 3.828692622              | 0.539936434   |              |
| C54                                                                                | -3.220069467 | 2.654333417              | -0.164871665  |              |
| C55                                                                                | -3.134572899 | 1.311407425              | 0.141724503   |              |
| C56                                                                                | -2.203446716 | 1.521682669              | -1.782755686  |              |
| C57                                                                                | -6.739242840 | 6.671389069              | 2.115776480   |              |
| C58                                                                                | -6.997885865 | 6.721233220              | 3.620538915   |              |
| C59                                                                                | -8.055148134 | 6.926405429              | 1.340073691   |              |
| C60                                                                                | -8.508515259 | 8.351153599              | 1.218888554   |              |
| C61                                                                                | -8.470387916 | 9.396806873              | 2.121100297   |              |
| C62                                                                                | -9.395608041 | 10.053641413             | 0.217273073   |              |
| C63                                                                                | 8.247717375  | 0.205265663              | 5.563851027   |              |
| C64                                                                                | 9.136029222  | -1.024162504             | 5.527245132   |              |
| C65                                                                                | 6.869681100  | -0.216785083             | 4.996052630   |              |
| C66                                                                                | 5.854229720  | 0.901872807              | 5.025904699   |              |
| C67                                                                                | 5.040299767  | 1.120639870              | 6.153481494   |              |
| C68                                                                                | 5.691664338  | 1.759605162              | 3.921519707   |              |
| C69                                                                                | 4.089686263  | 2.147477652              | 6.178684163   |              |
| C70                                                                                | 4.757906309  | 2.797030178              | 3.937551118   |              |
| C71                                                                                | 3.951504075  | 2.984687706              | 5.064736559   |              |

|       |               |               |              |
|-------|---------------|---------------|--------------|
| C72   | 6.192130286   | 6.176046325   | 0.358222676  |
| C73   | 5.362074093   | 7.426188089   | 0.017248777  |
| C74   | 5.280160308   | 4.958793127   | 0.486833717  |
| C75   | 4.896173442   | 9.169899757   | -1.669853264 |
| C76   | 3.466868332   | 8.976365451   | -2.183764230 |
| C77   | 1.678218781   | 7.294476274   | -2.610064022 |
| C78   | 0.853420925   | 6.965205606   | -1.339796647 |
| C79   | 1.784752239   | 6.090267210   | -3.574306930 |
| C80   | 0.503419081   | 5.385140701   | -4.034739829 |
| C81   | -0.339265653  | 6.108190158   | -5.098980646 |
| C82   | -1.749082122  | 8.151030028   | -4.815069475 |
| C83   | 0.735452066   | 5.858722209   | 0.840760557  |
| C84   | 0.529611458   | 7.063507121   | 1.770335041  |
| C85   | 1.437644532   | 4.750781186   | 1.654036772  |
| C86   | 1.685168365   | 8.932386278   | 2.845676997  |
| C87   | 1.283330999   | 10.354783989  | 2.493923211  |
| C88   | 0.406843054   | 11.849723875  | 0.788133418  |
| C89   | -0.911904970  | 12.527697071  | 1.238220659  |
| C90   | 0.577186933   | 11.959404342  | -0.730761836 |
| C91   | -0.526404134  | 11.265316524  | -1.518822656 |
| C92   | -3.168147431  | 12.229278775  | 2.145260007  |
| C93   | -3.170249319  | 13.258568039  | 3.264437206  |
| C94   | -4.083956363  | 11.032461666  | 2.530891565  |
| C95   | -4.221958278  | 10.034426435  | 1.403243136  |
| C96   | -5.216125036  | 10.197600445  | 0.427365179  |
| C97   | -3.327987699  | 8.958722369   | 1.262068108  |
| C98   | -5.302689861  | 9.337358913   | -0.670161153 |
| C99   | -3.378140634  | 8.109167073   | 0.153855294  |
| C100  | -4.365579958  | 8.312065330   | -0.806195649 |
| C101  | 5.464613113   | -3.958991382  | -8.162871883 |
| C102  | 4.008365103   | -3.562616049  | -7.980920624 |
| C103  | 2.469846445   | -1.968454441  | -6.860783898 |
| C104  | 2.243002702   | -0.549009646  | -7.392834655 |
| C105  | 2.859588838   | 1.813174665   | -7.114010207 |
| C106  | 4.136033993   | 2.640262482   | -6.974572318 |
| C107  | 6.302508158   | 2.994174970   | -5.921942403 |
| C108  | 7.207966152   | 3.142673788   | -7.128274837 |
| C109  | -1.052495355  | -2.740638066  | -9.713940818 |
| C110  | -2.000901681  | -1.547430669  | -9.546283930 |
| C111  | -0.957937738  | -3.538069818  | -8.392863440 |
| C112  | -0.352432737  | -4.933865101  | -8.632271991 |
| C113  | 0.016746921   | -5.594859943  | -7.323900026 |
| C114  | -2.280376023  | 0.772091510   | -8.819126061 |
| C115  | -1.522430670  | 2.017735613   | -9.233550433 |
| C116  | -2.944175021  | 0.856199411   | -7.422312508 |
| C117  | -1.945861966  | 0.644198455   | -6.315308418 |
| C118  | -1.158729316  | 1.707709956   | -5.840021548 |
| C119  | -1.713575493  | -0.647555973  | -5.813474400 |
| C120  | -0.140805305  | 1.472949601   | -4.912071037 |
| C121  | -0.694011492  | -0.880497274  | -4.886368675 |
| C122  | 0.106145699   | 0.177458504   | -4.446999170 |
| C123  | 7.981543150   | -6.936021112  | -3.400518166 |
| C124  | 8.907254150   | -7.235897957  | -2.211932743 |
| C125  | 6.514273934   | -7.229608046  | -3.050720319 |
| C126  | 5.496466716   | -6.789402724  | -4.054707330 |
| C127  | 5.325059099   | -7.280959622  | -5.332520888 |
| C128  | 3.664980914   | -5.900765430  | -4.852476656 |
| C129  | 9.572521445   | -8.703509960  | -0.401350254 |
| C130  | 11.041990534  | -8.616875944  | -0.750536973 |
| C131  | -0.145179465  | -6.848613411  | -0.599227847 |
| C132  | 1.219546799   | -7.133201396  | 0.044390931  |
| C133  | 2.371051393   | -7.347486627  | -0.974162949 |
| C134  | 2.261388637   | -8.750853238  | -1.624218620 |
| C135  | 3.465553121   | -9.184363259  | -2.462551954 |
| C136  | 3.390403748   | -10.641471898 | -2.977386149 |
| C137  | 3.721542058   | -7.239358936  | -0.252957515 |
| C138  | 3.843927581   | -1.064024155  | -1.392041498 |
| Fe139 | 4.361563401   | -2.241511667  | -2.986767029 |
| Fe140 | 2.365441881   | 0.299150315   | -1.005016843 |
| Fe141 | 5.002737744   | -0.049904271  | -0.142500262 |
| Fe142 | 4.513924554   | 0.300222849   | -2.691929510 |
| Fe143 | 4.206364174   | 2.317026166   | -0.978544142 |
| Fe144 | 4.725437115   | -2.587673071  | -0.446902407 |
| Fe145 | 2.384189658   | -2.320639427  | -1.362358495 |
| H146  | -7.155348622  | -6.729984764  | -1.593445581 |
| H147  | -7.018757703  | -5.676039166  | -2.832188968 |
| H148  | -10.213677983 | -3.546666658  | -1.015451018 |
| H149  | -9.299910135  | -4.989527845  | -2.622474278 |
| H150  | -9.519700979  | -6.192148446  | -1.354774141 |
| H151  | -8.246856741  | -1.897207210  | 0.140707984  |
| H152  | -9.858960354  | -4.627524538  | 1.675543776  |
| H153  | -9.996322543  | -1.789053245  | 0.435780088  |

|      |              |              |               |
|------|--------------|--------------|---------------|
| H154 | -9.626355549 | -5.475708350 | 3.826779430   |
| H155 | -7.257149274 | -5.161993050 | 1.927060897   |
| H156 | -9.401656482 | -3.820413221 | 4.438630665   |
| H157 | -3.587651526 | -1.555793428 | 2.297085304   |
| H158 | -5.898020057 | -3.115972606 | 1.704540142   |
| H159 | -5.018934403 | -5.777188179 | 2.049301432   |
| H160 | -5.884438796 | 0.296460902  | 5.979611119   |
| H161 | -6.758823335 | -1.690529669 | 4.060119984   |
| H162 | -5.122161010 | -5.933070999 | 3.820978415   |
| H163 | -5.183451022 | -0.942672881 | 1.821130074   |
| H164 | -6.127294223 | -3.319468100 | 6.253830858   |
| H165 | -7.285715564 | -0.796143718 | 6.137150939   |
| H166 | -1.543080800 | -3.268430377 | 2.624782174   |
| H167 | -1.289602832 | -2.045407491 | 1.345323963   |
| H168 | 0.104585917  | -2.774556316 | 2.144305247   |
| H169 | -1.965654365 | -0.923371992 | 3.487575003   |
| H170 | -5.675533321 | -4.596293522 | 8.137398612   |
| H171 | -2.062849398 | 2.084384361  | 4.619466707   |
| H172 | -2.803180593 | -0.503941864 | 8.208878332   |
| H173 | -2.340975034 | 2.932107803  | 8.890000843   |
| H174 | -0.460870759 | 0.251154412  | 1.913688234   |
| H175 | 0.968943245  | -0.400555314 | 2.728192087   |
| H176 | 8.107027028  | 0.485093550  | 6.626298150   |
| H177 | -2.786005666 | 3.590434703  | 5.222250956   |
| H178 | -2.908325667 | 4.087217440  | 7.661601532   |
| H179 | -1.025048902 | 3.344393753  | 5.336530925   |
| H180 | -1.162962860 | 3.825277854  | 7.898952126   |
| H181 | -3.165343794 | 1.733363041  | 6.853657344   |
| H182 | -0.103623140 | 1.602656524  | 6.927026323   |
| H183 | -2.137890834 | -0.117930976 | 5.681254767   |
| H184 | -0.104658503 | 0.735426924  | 3.587909069   |
| H185 | 1.822008982  | 3.986338572  | 0.961329823   |
| H186 | 0.674157373  | 4.288460286  | 2.297872614   |
| H187 | 2.542065669  | 4.789542151  | 3.285945570   |
| H188 | 2.485800541  | 3.999781026  | 5.830127436   |
| H189 | 4.622892089  | 3.438384847  | 3.066791256   |
| H190 | 6.281528698  | 1.592596109  | 3.017446178   |
| H191 | 5.134659391  | 0.465590318  | 7.024188535   |
| H192 | -2.295519469 | -2.846882377 | 5.037304658   |
| H193 | -1.833231403 | -5.765633217 | 5.749403836   |
| H194 | -1.392254029 | -5.331103312 | 7.417050665   |
| H195 | -3.755224893 | -4.324293623 | 5.911581525   |
| H196 | -5.141145975 | -3.139801465 | 9.012497492   |
| H197 | 3.449078520  | 2.287053641  | 7.052789856   |
| H198 | 0.534472424  | -2.283025376 | 4.556475675   |
| H199 | -2.576935785 | 0.050999493  | 10.891865813  |
| H200 | -2.850328081 | -1.581087012 | 10.227195616  |
| H201 | -0.137764409 | -1.640846425 | 10.051369363  |
| H202 | 9.101504963  | -8.660879991 | 5.823660490   |
| H203 | -1.475207916 | -5.600996200 | -4.729749528  |
| H204 | 1.138092238  | -6.094408937 | -1.976410394  |
| H205 | -1.094336002 | -5.567024762 | -9.139816645  |
| H206 | 0.535600630  | -4.857892334 | -9.277270403  |
| H207 | -1.956004852 | -3.655903675 | -7.942418126  |
| H208 | -0.694341864 | 1.837539476  | -9.958192282  |
| H209 | -1.571396013 | -3.378342141 | -10.446090664 |
| H210 | -3.041225683 | -1.678922580 | -3.121891643  |
| H211 | -4.087590560 | -4.413855646 | -2.205739019  |
| H212 | -0.480123831 | -0.391979521 | -8.732199867  |
| H213 | -3.100374239 | 0.693565030  | -9.561258370  |
| H214 | 0.818513659  | -1.841056574 | -9.651536549  |
| H215 | -1.339448620 | -5.531354359 | -2.973320526  |
| H216 | -0.353748245 | -2.965540852 | -7.671732104  |
| H217 | 0.734975070  | -3.159393253 | -10.631385125 |
| H218 | -6.314663432 | -2.490470910 | -4.462931045  |
| H219 | -3.496438419 | -1.903093589 | -1.446127855  |
| H220 | 1.857919534  | -4.962415194 | -7.601941411  |
| H221 | -2.454104837 | -3.937031985 | -1.770681184  |
| H222 | -4.212511784 | 2.893442489  | 2.472437851   |
| H223 | -3.511757857 | 0.811400099  | 1.029069559   |
| H224 | -8.747415587 | 1.571964592  | 2.057656623   |
| H225 | -7.358796802 | 0.724602409  | -0.454014317  |
| H226 | -6.777221236 | 4.820153272  | 1.043456085   |
| H227 | -8.085319354 | 9.476878433  | 3.131222330   |
| H228 | -7.361292663 | 5.753482181  | 4.044123000   |
| H229 | -8.852012514 | 6.298599505  | 1.778483658   |
| H230 | -5.987241288 | 7.433963640  | 1.859116002   |
| H231 | -9.867189605 | 10.711028330 | -0.509764156  |
| H232 | -3.016506882 | 4.470102641  | 0.962307811   |
| H233 | -4.363796642 | 4.449686962  | -0.182584417  |
| H234 | -9.155084831 | 11.406119118 | 1.844875373   |
| H235 | -7.908718037 | 6.558756384  | 0.312389227   |

|      |              |               |              |
|------|--------------|---------------|--------------|
| H236 | -6.092932177 | 2.627441735   | 0.234882105  |
| H237 | -7.714473578 | 0.144038752   | 1.932789074  |
| H238 | -9.398549723 | 3.039661553   | -2.187304640 |
| H239 | -1.674497791 | 1.335733632   | -2.713628349 |
| H240 | -9.909189580 | 1.343546232   | -2.275315388 |
| H241 | 9.626552011  | 1.688879373   | 5.248578637  |
| H242 | 8.170046811  | 1.992491926   | 4.567890024  |
| H243 | 2.363481100  | 5.731477963   | -0.573564489 |
| H244 | -0.269831871 | 5.504044243   | 0.572586306  |
| H245 | 2.412151302  | 7.716179779   | 1.281425187  |
| H246 | -2.558303492 | 3.647888900   | -1.941191334 |
| H247 | -3.909018153 | 4.787874732   | -3.402360361 |
| H248 | -5.127873367 | 4.238053368   | -5.190188293 |
| H249 | -3.711946302 | 5.956109881   | -2.351735055 |
| H250 | -4.259254844 | 1.999145667   | -4.861327109 |
| H251 | -6.017667901 | 2.195926804   | -5.163289846 |
| H252 | 1.573763027  | 11.597050274  | -1.018377377 |
| H253 | 0.527297959  | 13.030968055  | -0.979418337 |
| H254 | 0.894550840  | 10.247854158  | -2.631253238 |
| H255 | -0.801537497 | 9.901039198   | -2.976294885 |
| H256 | -1.230563533 | 9.830776831   | -5.871672963 |
| H257 | -0.783474792 | 5.372385956   | -5.786572493 |
| H258 | -6.095007169 | 9.468869916   | -1.411502780 |
| H259 | -2.570528510 | 8.759398923   | 2.025055856  |
| H260 | -3.126245159 | 8.320055113   | -3.291209568 |
| H261 | 2.414087675  | 5.331118891   | -3.082206914 |
| H262 | 3.697042108  | 6.956983948   | -2.011269195 |
| H263 | -0.132133132 | 5.112098313   | -3.177417229 |
| H264 | -7.845173819 | 0.778263213   | -3.165467676 |
| H265 | 5.484305086  | 9.637863040   | -2.470445289 |
| H266 | -5.274313693 | -0.114330578  | -4.237796435 |
| H267 | 2.351682887  | 6.429108870   | -4.457476949 |
| H268 | -2.638431884 | 7.317150268   | 0.032281176  |
| H269 | 4.828772386  | 9.887185638   | -0.839056847 |
| H270 | -0.494961682 | 8.368313646   | -6.436261438 |
| H271 | -3.143440094 | 9.601028729   | -4.456131749 |
| H272 | -4.681440817 | -2.792131544  | -4.663161766 |
| H273 | -5.776665693 | -2.716458883  | -2.223992917 |
| H274 | -5.942283613 | 11.008488860  | 0.523981394  |
| H275 | -4.654943672 | 1.992157901   | -2.419126889 |
| H276 | 1.177035508  | 8.141583524   | -3.088505109 |
| H277 | 0.308563070  | 6.758246244   | -5.701544741 |
| H278 | 0.826705390  | 4.434333495   | -4.481775576 |
| H279 | -2.073386697 | 6.371472882   | -3.883202949 |
| H280 | 1.070410720  | 8.613192244   | 3.700886196  |
| H281 | 0.558645239  | 9.698591300   | 0.696540714  |
| H282 | 1.180417559  | 12.484975649  | 1.247961458  |
| H283 | 2.733418449  | 8.964501128   | 3.171643102  |
| H284 | -1.653811885 | 10.744789439  | 1.862207376  |
| H285 | 6.102052866  | -3.061861034  | -8.145246770 |
| H286 | 5.724566379  | -4.552049208  | -7.261002365 |
| H287 | 8.096834207  | -5.859503656  | -3.592943239 |
| H288 | 6.540233775  | -5.179568403  | -9.389393011 |
| H289 | 4.918539300  | -5.392934178  | -9.495928368 |
| H290 | 5.906398350  | 4.094689832   | 0.744313755  |
| H291 | 6.277105561  | 6.617675776   | 2.350011003  |
| H292 | 6.255830790  | 7.528979744   | -1.835088966 |
| H293 | 4.543518035  | 5.125471822   | 1.285321614  |
| H294 | 7.600893006  | 7.116866872   | 1.526583212  |
| H295 | 6.887948292  | 2.504774758   | -5.127182868 |
| H296 | 6.920269160  | 5.991598061   | -0.447484636 |
| H297 | 3.274513288  | -7.717119190  | 5.396994777  |
| H298 | 5.382292879  | -8.809667997  | 3.455820719  |
| H299 | 5.062428678  | 1.275212625   | -5.691175138 |
| H300 | 4.100916657  | -0.732867820  | 4.211105031  |
| H301 | 2.544251752  | 1.864888168   | -8.163284554 |
| H302 | -0.518292329 | -1.887935801  | -4.502875533 |
| H303 | 2.085797141  | 2.330527441   | -6.520572518 |
| H304 | 2.748066241  | -5.128515750  | 4.905084301  |
| H305 | 3.416492568  | 0.127641229   | -5.870420973 |
| H306 | 2.753550170  | -5.499104261  | 3.176967794  |
| H307 | 3.122902650  | -7.879216729  | 3.630624161  |
| H308 | 5.128302001  | -6.306196464  | 3.383681832  |
| H309 | 5.066865236  | -6.012635498  | 5.130092195  |
| H310 | -3.729377184 | 0.087305225   | -7.383348362 |
| H311 | 3.575822356  | -10.251203721 | 5.361981780  |
| H312 | 2.837572677  | -12.504490654 | 3.439589068  |
| H313 | 0.903764176  | 0.002562382   | -3.724583427 |
| H314 | 3.601237443  | -12.626064270 | 6.257192003  |
| H315 | 2.133055121  | -12.848660727 | 5.564121705  |
| H316 | 4.620547347  | -3.908614688  | 2.900863229  |
| H317 | 0.472001150  | 2.296467719   | -4.539445785 |

|       |              |               |              |
|-------|--------------|---------------|--------------|
| H318  | -2.337289091 | -1.479814783  | -6.148728316 |
| H319  | 6.607931035  | -10.745001463 | -0.663951725 |
| H320  | 6.393939237  | -8.317663889  | -2.912985985 |
| H321  | 5.503730553  | -8.947259487  | 0.742448092  |
| H322  | 5.953039591  | -11.202298973 | -2.000287460 |
| H323  | 7.081022839  | 2.357365429   | -7.911573223 |
| H324  | 5.706341558  | -5.812842292  | 0.705366633  |
| H325  | 1.138797036  | -7.998702061  | 0.712189084  |
| H326  | 4.585086037  | -2.024380622  | -6.751118327 |
| H327  | 2.123415784  | -9.463976838  | -0.796971389 |
| H328  | 3.727534075  | -6.900448836  | -6.708212119 |
| H329  | 2.738820774  | -5.355142309  | -4.969046128 |
| H330  | 4.280625950  | -13.279971163 | 4.103712810  |
| H331  | 4.733400203  | -1.630040297  | 2.841057874  |
| H332  | 7.331295304  | -6.860157523  | 2.099505903  |
| H333  | 6.668242928  | -4.649661458  | 1.071029866  |
| H334  | 7.331635005  | -8.059967870  | 4.139411352  |
| H335  | 2.418807336  | -3.438638249  | 5.714551505  |
| H336  | 3.546687649  | -8.531361241  | -3.345231056 |
| H337  | 4.393349644  | -9.071177986  | -1.885721460 |
| H338  | 1.347228387  | -8.784951038  | -2.234740735 |
| H339  | 2.347131080  | -1.995706125  | -5.766739859 |
| H340  | -1.340995594 | 2.717854689   | -6.216736898 |
| H341  | -3.427172992 | 1.843296752   | -7.351554989 |
| H342  | 1.449429999  | -6.252109438  | 0.666303383  |
| H343  | 7.295275743  | -8.397119521  | 1.859608813  |
| H344  | 5.942719389  | -10.156095793 | 1.608733579  |
| H345  | 2.525174964  | -1.753877661  | 5.627614352  |
| H346  | 5.906762532  | -7.993827088  | -5.904390237 |
| H347  | 6.277024088  | -6.769198432  | -2.083760811 |
| H348  | 1.724669222  | -2.621616465  | -7.320633124 |
| H349  | 6.019200583  | 3.994442796   | -5.560754303 |
| H350  | 6.509478941  | -1.068434927  | 5.592662809  |
| H351  | 7.011358010  | -0.567889539  | 3.961431243  |
| H352  | 9.374356012  | -7.388342085  | -4.837417742 |
| H353  | 8.416362381  | -8.658049347  | -4.449620097 |
| H354  | 9.369263822  | -9.743213417  | -0.098985114 |
| H355  | 7.974203247  | -9.064078399  | -1.764238965 |
| H356  | 11.282937008 | -8.804025160  | -1.825148292 |
| H357  | 9.358912941  | -8.058025463  | 0.465159531  |
| H358  | 9.574119328  | -1.238593679  | 4.522062644  |
| H359  | -2.295929804 | 13.207862902  | 3.955612468  |
| H360  | 7.865359643  | -8.393249189  | 7.083091651  |
| H361  | 7.860061567  | -5.853299705  | 6.028569908  |
| H362  | -3.576372804 | 12.714654810  | 1.243361105  |
| H363  | -3.676029473 | 10.546094260  | 3.431056193  |
| H364  | -5.065548854 | 11.449212134  | 2.798506437  |
| H365  | -5.238359344 | 7.561485516   | -2.378821955 |
| Mo366 | 3.737949839  | -4.649641118  | -1.874641818 |
| N367  | -7.681250595 | -6.291782996  | -2.353892858 |
| N368  | -9.386434217 | -3.583231058  | -0.424339001 |
| N369  | -9.361348409 | -4.041916762  | 2.341881427  |
| N370  | -6.844339601 | -5.187627979  | 2.862246981  |
| N371  | -5.175656805 | -2.933763904  | 2.397564386  |
| N372  | -5.988223216 | -1.267974731  | 4.582056967  |
| N373  | -5.563356513 | -2.871951866  | 6.981302102  |
| N374  | -3.145897168 | -4.455343900  | 6.722729238  |
| N375  | -1.304340512 | -2.848186270  | 5.280355801  |
| N376  | -1.228128623 | 0.053561078   | 6.116828845  |
| N377  | -2.045424094 | -0.262939199  | 8.850524658  |
| N378  | 2.977822496  | -12.276067961 | 5.526003007  |
| N379  | 4.219405360  | -10.094303064 | 4.579343467  |
| N380  | 4.021044551  | -3.926240591  | 3.728971347  |
| N381  | 2.994477766  | -2.647151672  | 5.422197003  |
| N382  | 4.179909697  | -1.617187376  | 3.717679907  |
| N383  | 7.141625722  | -8.230512509  | 5.151970643  |
| N384  | -5.376649494 | -2.132647471  | -4.266973272 |
| N385  | -1.801751210 | -5.214871111  | -3.839600959 |
| N386  | -5.526487513 | 0.316277921   | -3.332793334 |
| N387  | -7.884455197 | 1.643436411   | -2.630880636 |
| N388  | -8.039520902 | 1.212702104   | 0.144823148  |
| N389  | -5.883463513 | 2.663811532   | 1.235342666  |
| N390  | -2.618030609 | 2.774155777   | -1.404159204 |
| N391  | -2.504815419 | 0.615172636   | -0.865758379 |
| N392  | -6.279237211 | 5.342190993   | 1.760458593  |
| N393  | -9.088434513 | 8.775393941   | 0.033150782  |
| N394  | -9.037923254 | 10.470164997  | 1.465032279  |
| N395  | 8.855955006  | 1.251405192   | 4.737549844  |
| N396  | 6.937325100  | 6.342069526   | 1.616035843  |
| N397  | 5.579361652  | 7.971355960   | -1.217869832 |
| N398  | 3.041062308  | 7.700561768   | -2.277915717 |
| N399  | -1.430152706 | 6.895305006   | -4.515123635 |

|      |              |               |               |
|------|--------------|---------------|---------------|
| N400 | -1.178884176 | 8.817309684   | -5.837548836  |
| N401 | -2.643729699 | 8.815932204   | -4.046437864  |
| N402 | 1.458966850  | 6.202859591   | -0.385617621  |
| N403 | 1.549338229  | 7.968705634   | 1.770394534   |
| N404 | 0.623417803  | 10.513632361  | 1.307164085   |
| N405 | -0.097199462 | 10.514070827  | -2.568584293  |
| N406 | -1.816334409 | 11.749070722  | 1.882954908   |
| N407 | 5.649562373  | -4.678256417  | -9.426545647  |
| N408 | 3.790573507  | -2.471674795  | -7.217043279  |
| N409 | 2.930438740  | 0.411729179   | -6.736806235  |
| N410 | 5.136452662  | 2.169546263   | -6.188090204  |
| N411 | 0.218784419  | -2.331520113  | -10.325911455 |
| N412 | -1.460696984 | -0.407687389  | -9.030125676  |
| N413 | 8.407270157  | -7.647439845  | -4.621159342  |
| N414 | 4.447307379  | -5.913711972  | -3.772700573  |
| N415 | 4.170554744  | -6.706293764  | -5.814038531  |
| N416 | 8.724261719  | -8.404900487  | -1.541460230  |
| N417 | 0.016842710  | 2.414482518   | 0.151512549   |
| N418 | 0.752673551  | 1.740669340   | -0.337507982  |
| O419 | -7.326429052 | -4.504468915  | -0.110388642  |
| O420 | -8.250730432 | -2.079333742  | 2.675384052   |
| O421 | -7.114041192 | -4.682488755  | 5.077408890   |
| O422 | -3.784509309 | -3.800436837  | 3.975141988   |
| O423 | -3.902783270 | -0.359941215  | 4.494099279   |
| O424 | -4.819545906 | -0.916336042  | 7.901041278   |
| O425 | -2.904737096 | -4.265188614  | 8.997201897   |
| O426 | 0.421803428  | -4.098695664  | 6.142485373   |
| O427 | 0.987514538  | -0.509247048  | 6.179761607   |
| O428 | -0.263316851 | 1.050169938   | 9.353404052   |
| O429 | -0.610482715 | -1.220643219  | 11.992204082  |
| O430 | 5.228964482  | -11.245243644 | 2.847831945   |
| O431 | 5.600792510  | -8.841541667  | 6.744302668   |
| O432 | 9.763327843  | -6.270790136  | 6.631228538   |
| O433 | -5.880000713 | -0.360456985  | -1.160620141  |
| O434 | -3.259580769 | -3.871867020  | -4.951030133  |
| O435 | -6.657635040 | 3.335664307   | -1.714849671  |
| O436 | -5.079853592 | 3.848466669   | -4.299035588  |
| O437 | -9.906586222 | 2.546071970   | 0.255771596   |
| O438 | -6.458588833 | 2.025063004   | 3.351056363   |
| O439 | -4.565092051 | 5.317098772   | 3.264562050   |
| O440 | -6.888721651 | 7.721644706   | 4.310457011   |
| O441 | 9.359518970  | -1.743287411  | 6.490248651   |
| O442 | 3.022350970  | 4.005681076   | 5.016157795   |
| O443 | 4.548286323  | 7.922672696   | 0.814699232   |
| O444 | 2.784690160  | 9.976606239   | -2.485133808  |
| O445 | -0.303146176 | 7.398880107   | -1.220158485  |
| O446 | -0.468113046 | 7.152204522   | 2.496540431   |
| O447 | 2.508161147  | 5.282259102   | 2.440762045   |
| O448 | 1.539863701  | 11.293174229  | 3.259012560   |
| O449 | -1.082287017 | 13.741742249  | 1.055510459   |
| O450 | -1.724726401 | 11.417935085  | -1.239827913  |
| O451 | -4.075845237 | 14.061625709  | 3.427536879   |
| O452 | -4.371055693 | 7.475152062   | -1.937713721  |
| O453 | 3.089196669  | -4.253497984  | -8.484500351  |
| O454 | 1.495777976  | -0.324002972  | -8.367797150  |
| O455 | 4.202133845  | 3.744433058   | -7.540274590  |
| O456 | 8.041297099  | 4.027054512   | -7.235648192  |
| O457 | -3.201991599 | -1.631599125  | -9.853413051  |
| O458 | -0.785154328 | -6.189156421  | -6.611984954  |
| O459 | 1.301870169  | -5.461187380  | -6.928718941  |
| O460 | -1.801136150 | 3.149860630   | -8.863225468  |
| O461 | 9.837612717  | -6.464878785  | -1.903139616  |
| O462 | 11.926112302 | -8.436001476  | 0.075258872   |
| O463 | -0.091057605 | -6.168389416  | -1.724299943  |
| O464 | -1.197892539 | -7.194944787  | -0.045920289  |
| O465 | 4.453727552  | -11.350922407 | -2.880416511  |
| O466 | 2.299253665  | -11.023581990 | -3.486526732  |
| O467 | 4.530785909  | -6.289564839  | -0.641475831  |
| O468 | 4.006313875  | -8.051389587  | 0.648304012   |
| O469 | 2.288358796  | -6.291987461  | -1.962486026  |
| O470 | 7.734126748  | -7.703579376  | 2.425124624   |
| O471 | 6.276321280  | -5.464335097  | 1.438796226   |
| O472 | -3.224328301 | 5.324301499   | -2.925520457  |
| O473 | 6.824178631  | -11.215021892 | -1.500431391  |
| O474 | 6.288435008  | -9.529346486  | 0.922003125   |
| S475 | 4.365298207  | 4.603970835   | -1.081466966  |
| S476 | 2.797134421  | 1.771450721   | -2.705599068  |
| S477 | 2.428232623  | -3.316952261  | -3.354945540  |
| S478 | 3.467732230  | 1.263496026   | 0.847433903   |
| S479 | 0.677223984  | -1.199225380  | -0.860952576  |
| S480 | 5.108727918  | -0.831783368  | -4.525451439  |
| S481 | 2.940300204  | -3.785368672  | 0.211472563   |



|                        |                              |              |               |                |
|------------------------|------------------------------|--------------|---------------|----------------|
|                        | S482                         | 6.197063141  | 1.263520636   | -1.466749491   |
|                        | S483                         | 5.861425600  | -3.623237601  | -2.055805424   |
|                        | S484                         | 6.020062457  | -1.624336626  | 1.046525706    |
|                        | end                          |              |               |                |
| <b>core-S2BH</b>       | <b>cores2bh2n2xdte.car_3</b> |              |               |                |
| <b>2N2 associated</b>  | 1                            | -8.338077991 | -4.658608075  | 0.732112488 C  |
| <b>35, S=3/2</b>       | 2                            | -8.768923583 | -5.761269761  | -0.242291423 C |
|                        | 3                            | -9.036649919 | -2.630001207  | 1.928683026 C  |
|                        | 4                            | -8.476184384 | -2.918114484  | 3.318530556 C  |
|                        | 5                            | -8.289201703 | -4.494276046  | 5.176350807 C  |
| <b>Fe (139) -2.317</b> | 6                            | -6.776182184 | -4.731986262  | 5.172703805 C  |
| <b>Fe (140) -1.082</b> | 7                            | -4.784613135 | -5.281721140  | 3.870349472 C  |
| <b>Fe (141) -2.479</b> | 8                            | -4.070141713 | -3.928740433  | 3.855732281 C  |
| <b>Fe (142) 3.021</b>  | 9                            | -4.134097797 | -1.593504220  | 3.140477561 C  |
| <b>Fe (143) 2.778</b>  | 10                           | -4.092639701 | -0.964140866  | 4.541620880 C  |
| <b>Fe (144) 2.218</b>  | 11                           | -5.261520009 | -0.539573126  | 6.626701733 C  |
| <b>Fe (145) 0.451</b>  | 12                           | -4.389536238 | -1.226668792  | 7.685755543 C  |
|                        | 13                           | -3.795435880 | -3.328927898  | 8.792449391 C  |
|                        | 14                           | -2.361274483 | -3.793173240  | 8.500717352 C  |
|                        | 15                           | -0.801933123 | -4.609757418  | 6.775989204 C  |
|                        | 16                           | 0.163593444  | -3.624790483  | 6.107111356 C  |
|                        | 17                           | 0.425785691  | -1.655545968  | 4.636484934 C  |
|                        | 18                           | 0.766560654  | -0.480843635  | 5.582839689 C  |
|                        | 19                           | -0.228590342 | -1.199359322  | 3.318860249 C  |
|                        | 20                           | 0.585396492  | -0.074216611  | 2.669752707 C  |
|                        | 21                           | -0.400369894 | -2.396399506  | 2.375509674 C  |
|                        | 22                           | -0.110339457 | 1.338809413   | 7.005695371 C  |
|                        | 23                           | 0.077178494  | 0.932331424   | 8.483097376 C  |
|                        | 24                           | -1.254284623 | 2.365536679   | 6.813638935 C  |
|                        | 25                           | -1.135140316 | 3.520221469   | 7.815390391 C  |
|                        | 26                           | -1.264342442 | 2.901130565   | 5.376193143 C  |
|                        | 27                           | -0.807158913 | -0.159886307  | 10.463950105 C |
|                        | 28                           | 0.527979749  | -0.757783176  | 10.858698199 C |
|                        | 29                           | 4.472905156  | -12.080297129 | 4.328187969 C  |
|                        | 30                           | 5.200790391  | -10.865319691 | 3.756545743 C  |
|                        | 31                           | 5.641034931  | -8.443248453  | 4.175958840 C  |
|                        | 32                           | 6.810093611  | -8.185141907  | 5.146277594 C  |
|                        | 33                           | 4.571315037  | -7.342572962  | 4.277117860 C  |
|                        | 34                           | 5.112606073  | -5.945702953  | 3.966708991 C  |
|                        | 35                           | 3.981065326  | -4.931071495  | 3.805323310 C  |
|                        | 36                           | 4.239542497  | -2.434479246  | 3.964902951 C  |
|                        | 37                           | 9.170906954  | -7.553488371  | 5.326385906 C  |
|                        | 38                           | 9.559561309  | -6.091101475  | 5.339285371 C  |
|                        | 39                           | -5.471648846 | -2.212593737  | -1.975912392 C |
|                        | 40                           | -5.763710494 | -0.759103770  | -1.561169918 C |
|                        | 41                           | -3.970053808 | -2.501578390  | -1.779109998 C |
|                        | 42                           | -3.581916709 | -3.994373545  | -1.838381256 C |
|                        | 43                           | -3.228262536 | -4.534729483  | -3.223469949 C |
|                        | 44                           | -5.846702811 | 1.534129635   | -2.500533376 C |
|                        | 45                           | -6.977352053 | 2.126641389   | -1.653027848 C |
|                        | 46                           | -5.825866695 | 2.122868413   | -3.918058485 C |
|                        | 47                           | -9.254658109 | 1.838338557   | -0.804149708 C |
|                        | 48                           | -8.971508989 | 1.820254132   | 0.703270076 C  |
|                        | 49                           | -7.482276068 | 1.101570041   | 2.511171550 C  |
|                        | 50                           | -6.263071777 | 1.954756642   | 2.863801168 C  |
|                        | 51                           | -4.514419724 | 3.507461147   | 2.148111960 C  |
|                        | 52                           | -4.929151132 | 4.829780291   | 2.814133501 C  |
|                        | 53                           | -3.739641421 | 3.884800408   | 0.874475759 C  |
|                        | 54                           | -3.178350302 | 2.721989718   | 0.126084813 C  |
|                        | 55                           | -2.885724829 | 1.416421798   | 0.470078885 C  |
|                        | 56                           | -2.418605939 | 1.580211163   | -1.619367269 C |
|                        | 57                           | -6.583895013 | 6.642321335   | 2.759143285 C  |
|                        | 58                           | -6.637120798 | 6.774452496   | 4.280043506 C  |
|                        | 59                           | -7.992200539 | 6.835184209   | 2.149197418 C  |
|                        | 60                           | -8.480901456 | 8.246924086   | 2.016064772 C  |
|                        | 61                           | -8.383191620 | 9.324979460   | 2.874356938 C  |
|                        | 62                           | -9.498317829 | 9.893456208   | 1.045059173 C  |
|                        | 63                           | 8.941409231  | 0.674312778   | 4.351539432 C  |
|                        | 64                           | 9.872113052  | -0.519362149  | 4.255192609 C  |
|                        | 65                           | 7.518133812  | 0.167945824   | 4.000458338 C  |
|                        | 66                           | 6.466455574  | 1.247407214   | 4.107334869 C  |
|                        | 67                           | 5.801830371  | 1.493935289   | 5.322350379 C  |
|                        | 68                           | 6.114257629  | 2.029691335   | 2.993835919 C  |
|                        | 69                           | 4.809308791  | 2.473786182   | 5.424879441 C  |
|                        | 70                           | 5.135492528  | 3.020299962   | 3.084063580 C  |
|                        | 71                           | 4.476254148  | 3.233615828   | 4.298319914 C  |
|                        | 72                           | 5.968383946  | 6.319785616   | -0.782043453 C |
|                        | 73                           | 5.053716649  | 7.522789063   | -1.065688213 C |
|                        | 74                           | 5.126520214  | 5.084363823   | -0.465615949 C |
|                        | 75                           | 4.320096650  | 9.176769535   | -2.748610217 C |
|                        | 76                           | 2.848530595  | 8.916688387   | -3.081510019 C |

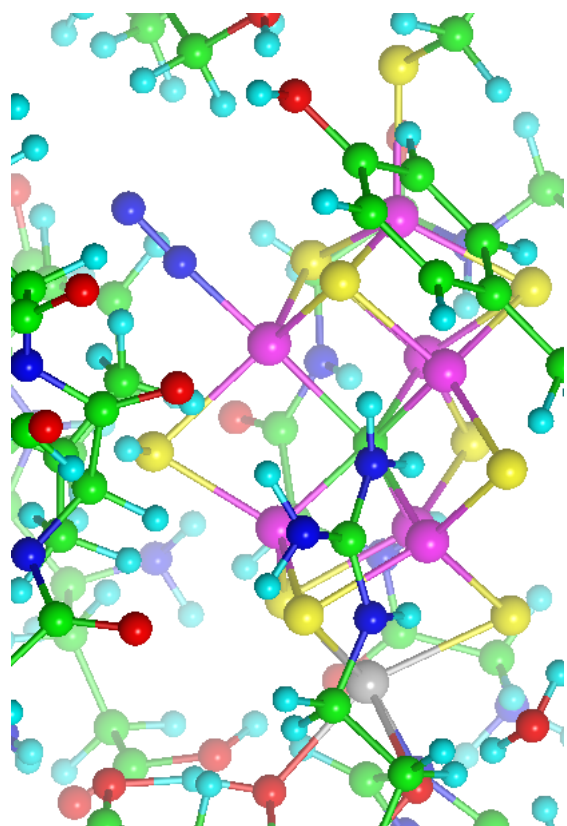

|     |               |               |              |   |
|-----|---------------|---------------|--------------|---|
| 77  | 1.066035418   | 7.172980337   | -3.174415481 | C |
| 78  | 0.422885335   | 6.870890647   | -1.795344590 | C |
| 79  | 1.097846805   | 5.936119311   | -4.103976126 | C |
| 80  | -0.197480870  | 5.165492706   | -4.385411730 | C |
| 81  | -1.196051801  | 5.818739684   | -5.353827334 | C |
| 82  | -2.568059545  | 7.872033343   | -4.978476635 | C |
| 83  | 0.627902901   | 5.891467431   | 0.438372388  | C |
| 84  | 0.508892076   | 7.135787328   | 1.329990696  | C |
| 85  | 1.453790347   | 4.842912109   | 1.213561883  | C |
| 86  | 1.758812851   | 9.058537133   | 2.183856806  | C |
| 87  | 1.318961577   | 10.470069598  | 1.832678232  | C |
| 88  | 0.203393870   | 11.893143486  | 0.199027766  | C |
| 89  | -1.055584307  | 12.575377148  | 0.788660176  | C |
| 90  | 0.175255016   | 11.932440442  | -1.332321548 | C |
| 91  | -1.010796324  | 11.206802095  | -1.957855704 | C |
| 92  | -3.175575835  | 12.283450158  | 1.979782533  | C |
| 93  | -3.058831019  | 13.366315768  | 3.043351297  | C |
| 94  | -4.021636241  | 11.095647635  | 2.520619036  | C |
| 95  | -4.261620285  | 10.038100389  | 1.467602964  | C |
| 96  | -5.370777456  | 10.122346357  | 0.611786628  | C |
| 97  | -3.357844722  | 8.978822743   | 1.276475059  | C |
| 98  | -5.558592286  | 9.199487251   | -0.420179622 | C |
| 99  | -3.512698884  | 8.065092130   | 0.230588405  | C |
| 100 | -4.611051492  | 8.194349901   | -0.616558944 | C |
| 101 | 4.410261323   | -4.322474806  | -8.562119471 | C |
| 102 | 2.988472753   | -3.926938322  | -8.200995539 | C |
| 103 | 1.599461758   | -2.272856916  | -6.972770000 | C |
| 104 | 1.288305697   | -0.887174531  | -7.546292264 | C |
| 105 | 1.864082544   | 1.498218747   | -7.444461727 | C |
| 106 | 3.129455539   | 2.346869305   | -7.500405916 | C |
| 107 | 5.442666684   | 2.716273595   | -6.860192256 | C |
| 108 | 6.056704415   | 3.000816748   | -8.217043497 | C |
| 109 | -2.226172692  | -3.239855320  | -9.374552477 | C |
| 110 | -3.167655481  | -2.048808590  | -9.156689202 | C |
| 111 | -1.980110368  | -3.960960533  | -8.028812108 | C |
| 112 | -1.384506514  | -5.365116994  | -8.244955688 | C |
| 113 | -0.871341852  | -5.931877495  | -6.939494427 | C |
| 114 | -3.410714171  | 0.296873628   | -8.512610839 | C |
| 115 | -2.755738478  | 1.537534583   | -9.084272639 | C |
| 116 | -3.902911805  | 0.433025519   | -7.052410976 | C |
| 117 | -2.790421983  | 0.251450458   | -6.053437029 | C |
| 118 | -1.909013443  | 1.303412817   | -5.748114407 | C |
| 119 | -2.557561081  | -1.011859356  | -5.486509198 | C |
| 120 | -0.794127420  | 1.076682456   | -4.935699797 | C |
| 121 | -1.440202691  | -1.239046544  | -4.676963090 | C |
| 122 | -0.545241339  | -0.198147103  | -4.419332503 | C |
| 123 | 7.593354350   | -6.985239718  | -4.061797808 | C |
| 124 | 8.683479070   | -7.179711374  | -2.998381852 | C |
| 125 | 6.199695042   | -7.147482776  | -3.436678836 | C |
| 126 | 5.035350821   | -6.828438769  | -4.319202620 | C |
| 127 | 4.716937271   | -7.410560885  | -5.529303359 | C |
| 128 | 3.046157300   | -6.113265897  | -4.878411044 | C |
| 129 | 9.632777543   | -8.508953564  | -1.209959490 | C |
| 130 | 11.045625999  | -8.386242891  | -1.734702318 | C |
| 131 | -0.141113256  | -6.776870010  | -0.121824454 | C |
| 132 | 1.304894983   | -7.037719111  | 0.329582888  | C |
| 133 | 2.310794196   | -7.281362882  | -0.828489546 | C |
| 134 | 2.137944746   | -8.709376186  | -1.407211243 | C |
| 135 | 3.234628052   | -9.166070511  | -2.373931948 | C |
| 136 | 3.136924505   | -10.649034301 | -2.799206505 | C |
| 137 | 3.745105100   | -7.136491821  | -0.300513662 | C |
| 138 | 3.613451405   | -1.054889660  | -1.813817357 | C |
| 139 | 4.008506213   | -2.335563404  | -3.384776070 | C |
| Fe  |               |               |              |   |
| 140 | 2.157471728   | 0.438943981   | -1.323766806 |   |
| Fe  |               |               |              |   |
| 141 | 4.914610075   | 0.044261108   | -0.793993228 |   |
| Fe  |               |               |              |   |
| 142 | 4.205553485   | 0.225217055   | -3.309191828 |   |
| Fe  |               |               |              |   |
| 143 | 4.035525094   | 2.331838161   | -1.689574284 |   |
| Fe  |               |               |              |   |
| 144 | 4.636886842   | -2.507658876  | -0.855147638 |   |
| Fe  |               |               |              |   |
| 145 | 2.245514837   | -2.312616358  | -1.579277661 |   |
| Fe  |               |               |              |   |
| 146 | -7.077291381  | -6.898121346  | -0.157823935 | H |
| 147 | -7.118147002  | -5.888981585  | -1.438701308 | H |
| 148 | -10.237587575 | -3.869572160  | 0.675010094  | H |
| 149 | -9.410683962  | -5.311994820  | -1.017515223 | H |
| 150 | -9.414484161  | -6.456522971  | 0.321757476  | H |
| 151 | -8.297915721  | -1.992305732  | 1.420322379  | H |

|     |               |              |               |   |
|-----|---------------|--------------|---------------|---|
| 152 | -9.437791713  | -4.725933186 | 3.372537358   | H |
| 153 | -9.963695624  | -2.052447967 | 2.044047628   | H |
| 154 | -8.787932774  | -5.420966224 | 5.490532233   | H |
| 155 | -6.794941957  | -5.177984457 | 3.156882046   | H |
| 156 | -8.484993891  | -3.725316875 | 5.935268955   | H |
| 157 | -3.110642347  | -1.585015689 | 2.748977103   | H |
| 158 | -5.518919515  | -3.149923114 | 2.622172738   | H |
| 159 | -4.568273077  | -5.816494367 | 2.935893521   | H |
| 160 | -4.936548182  | 0.507196222  | 6.573616103   | H |
| 161 | -6.027280703  | -1.580954860 | 4.906646794   | H |
| 162 | -4.372475097  | -5.860920387 | 4.705217188   | H |
| 163 | -4.757263227  | -0.983571778 | 2.472253767   | H |
| 164 | -5.106907539  | -3.084586106 | 7.119273169   | H |
| 165 | -6.308343189  | -0.562315101 | 6.959506773   | H |
| 166 | -0.937369277  | -3.225446495 | 2.857418339   | H |
| 167 | -0.979552495  | -2.106514029 | 1.486386605   | H |
| 168 | 0.575952861   | -2.775897778 | 2.034127203   | H |
| 169 | -1.222384041  | -0.793238457 | 3.570808726   | H |
| 170 | -4.392855858  | -4.224836118 | 9.016934018   | H |
| 171 | -1.395307191  | 2.097538117  | 4.638442702   | H |
| 172 | -1.742250086  | -0.095267678 | 8.554189150   | H |
| 173 | -1.180536615  | 3.179608851  | 8.859893385   | H |
| 174 | 0.088769106   | 0.270010678  | 1.751380305   | H |
| 175 | 1.600489067   | -0.407932578 | 2.405013490   | H |
| 176 | 8.934929616   | 1.007684259  | 5.407117840   | H |
| 177 | -2.087930833  | 3.618314147  | 5.242378311   | H |
| 178 | -1.956662447  | 4.234464220  | 7.656876284   | H |
| 179 | -0.319532968  | 3.423723219  | 5.153980464   | H |
| 180 | -0.184545720  | 4.059621757  | 7.675850999   | H |
| 181 | -2.211329882  | 1.844563762  | 6.997168756   | H |
| 182 | 0.844166219   | 1.808911535  | 6.728522817   | H |
| 183 | -1.236190964  | -0.081894058 | 5.846013480   | H |
| 184 | 0.681820828   | 0.800204553  | 3.331118496   | H |
| 185 | 1.763829485   | 4.044644293  | 0.522419216   | H |
| 186 | 0.787699470   | 4.406786751  | 1.973662383   | H |
| 187 | 2.788025811   | 4.957994013  | 2.658572029   | H |
| 188 | 3.091530119   | 4.247475991  | 5.207515817   | H |
| 189 | 4.856289284   | 3.607627900  | 2.209198288   | H |
| 190 | 6.589029461   | 1.842386879  | 2.027896304   | H |
| 191 | 6.048215400   | 0.895993783  | 6.203608173   | H |
| 192 | -1.393831438  | -2.686240896 | 5.146093220   | H |
| 193 | -0.972298966  | -5.439721414 | 6.072503344   | H |
| 194 | -0.284958392  | -5.005326132 | 7.657385749   | H |
| 195 | -2.798671984  | -3.945840793 | 6.483209072   | H |
| 196 | -3.748622406  | -2.713592446 | 9.699357264   | H |
| 197 | 4.285465904   | 2.630187639  | 6.371294677   | H |
| 198 | 1.386928092   | -2.129128817 | 4.404883771   | H |
| 199 | -1.006247780  | 0.720322832  | 11.096910896  | H |
| 200 | -1.577132255  | -0.917331779 | 10.677517807  | H |
| 201 | 1.044997194   | -1.329980320 | 10.054036667  | H |
| 202 | 10.020986802  | -8.155982760 | 4.970333071   | H |
| 203 | -1.977347605  | -5.832377520 | -4.177117420  | H |
| 204 | 0.958195401   | -6.083733862 | -1.708654229  | H |
| 205 | -2.166014335  | -6.036501008 | -8.627597190  | H |
| 206 | -0.569802078  | -5.323932128 | -8.982693381  | H |
| 207 | -2.924020129  | -4.057105921 | -7.470561969  | H |
| 208 | -2.112890168  | 1.347218396  | -9.975695465  | H |
| 209 | -2.813623308  | -3.920464293 | -10.009702890 | H |
| 210 | -3.397242957  | -1.925915948 | -2.522264884  | H |
| 211 | -4.415880424  | -4.613494762 | -1.462132529  | H |
| 212 | -1.582627082  | -0.825075803 | -8.604909085  | H |
| 213 | -4.312779512  | 0.160503863  | -9.144977047  | H |
| 214 | -0.366443321  | -2.333770267 | -9.559537543  | H |
| 215 | -1.654279388  | -5.683547601 | -2.446605347  | H |
| 216 | -1.311930695  | -3.342235822 | -7.409645546  | H |
| 217 | -0.549476802  | -3.694237578 | -10.464318061 | H |
| 218 | -6.836915060  | -2.813273026 | -3.405721450  | H |
| 219 | -3.675634052  | -2.101726104 | -0.799431795  | H |
| 220 | 0.923371068   | -5.310002103 | -7.448493332  | H |
| 221 | -2.740818232  | -4.180270269 | -1.154933701  | H |
| 222 | -3.860942004  | 2.992229788  | 2.865880854   | H |
| 223 | -2.998280765  | 0.945780342  | 1.443596641   | H |
| 224 | -8.319382301  | 1.482390145  | 3.113088015   | H |
| 225 | -7.294748846  | 0.609973142  | 0.444122525   | H |
| 226 | -6.723070791  | 4.717346310  | 1.826232184   | H |
| 227 | -7.904249832  | 9.452220740  | 3.838777621   | H |
| 228 | -6.932631468  | 5.830433394  | 4.799131805   | H |
| 229 | -8.715138646  | 6.220803458  | 2.715917871   | H |
| 230 | -5.889040396  | 7.399097474  | 2.362082791   | H |
| 231 | -10.049197175 | 10.515240887 | 0.343777899   | H |
| 232 | -2.944203194  | 4.582132542  | 1.186596010   | H |
| 233 | -4.415168116  | 4.449542147  | 0.211021722   | H |

|     |               |               |              |   |
|-----|---------------|---------------|--------------|---|
| 234 | -9.135777006  | 11.308221860  | 2.595530947  | H |
| 235 | -7.970626327  | 6.415505066   | 1.131256411  | H |
| 236 | -5.994871143  | 2.573528669   | 0.895401834  | H |
| 237 | -7.284054384  | 0.076685536   | 2.857855436  | H |
| 238 | -9.576429407  | 2.861674180   | -1.041438448 | H |
| 239 | -2.082525919  | 1.381441185   | -2.634373304 | H |
| 240 | -10.099633496 | 1.165981635   | -1.003269555 | H |
| 241 | 10.196688025  | 2.187771679   | 3.769686543  | H |
| 242 | 8.648425432   | 2.397680482   | 3.285753994  | H |
| 243 | 2.064824534   | 5.732555657   | -1.165606362 | H |
| 244 | -0.390825468  | 5.498678665   | 0.314000526  | H |
| 245 | 2.297600326   | 7.800921930   | 0.580269027  | H |
| 246 | -2.999123245  | 3.652822613   | -1.796625722 | H |
| 247 | -4.484131119  | 4.566769454   | -3.138862990 | H |
| 248 | -5.889803386  | 3.896533869   | -4.745991538 | H |
| 249 | -4.142855363  | 5.774781034   | -2.165825043 | H |
| 250 | -4.962009752  | 1.699012474   | -4.455342549 | H |
| 251 | -6.749561530  | 1.840684597   | -4.448355795 | H |
| 252 | 1.132851019   | 11.566695198  | -1.729269682 | H |
| 253 | 0.082813643   | 12.991078735  | -1.622125609 | H |
| 254 | 0.256706806   | 10.208505875  | -3.265083574 | H |
| 255 | -1.470083021  | 9.874680976   | -3.403156099 | H |
| 256 | -2.372497480  | 9.452249407   | -6.268864979 | H |
| 257 | -1.720631308  | 5.039644781   | -5.928424135 | H |
| 258 | -6.434890555  | 9.268293368   | -1.070688910 | H |
| 259 | -2.513388440  | 8.836105893   | 1.956458460  | H |
| 260 | -3.667555149  | 8.139532251   | -3.256548955 | H |
| 261 | 1.812055302   | 5.219466694   | -3.668132081 | H |
| 262 | 3.150282959   | 6.919595715   | -2.807226028 | H |
| 263 | -0.708512005  | 4.887176194   | -3.450351185 | H |
| 264 | -8.182469419  | 0.556120386   | -2.152298057 | H |
| 265 | 4.790475797   | 9.630102359   | -3.631334661 | H |
| 266 | -5.809608800  | -0.411566331  | -3.519113223 | H |
| 267 | 1.539538110   | 6.263259295   | -5.059901289 | H |
| 268 | -2.766791930  | 7.287653745   | 0.062245809  | H |
| 269 | 4.322760939   | 9.925180280   | -1.942808868 | H |
| 270 | -1.779582254  | 7.947828084   | -6.877544590 | H |
| 271 | -3.906400011  | 9.340194141   | -4.484434919 | H |
| 272 | -5.243705347  | -3.113965180  | -3.814748139 | H |
| 273 | -6.028477490  | -2.837043647  | -1.251263626 | H |
| 274 | -6.105957607  | 10.918351821  | 0.753391336  | H |
| 275 | -4.921823109  | 1.826983654   | -1.983530143 | H |
| 276 | 0.478842011   | 7.986879796   | -3.610047771 | H |
| 277 | -0.653849348  | 6.441482385   | -6.077673185 | H |
| 278 | 0.112177164   | 4.216384172   | -4.847801768 | H |
| 279 | -2.744561372  | 6.141183256   | -3.921377284 | H |
| 280 | 1.246987182   | 8.770573175   | 3.114474989  | H |
| 281 | 0.365662926   | 9.742630200   | 0.178095139  | H |
| 282 | 1.024055872   | 12.551699712  | 0.524227655  | H |
| 283 | 2.837872108   | 9.096979903   | 2.387681057  | H |
| 284 | -1.679789932  | 10.811197270  | 1.573640808  | H |
| 285 | 5.044803980   | -3.426719369  | -8.632186111 | H |
| 286 | 4.782260077   | -4.910487908  | -7.697254282 | H |
| 287 | 7.713008259   | -5.949221619  | -4.411618254 | H |
| 288 | 5.337887999   | -5.510045865  | -9.933390937 | H |
| 289 | 3.733627860   | -5.798359276  | -9.784721006 | H |
| 290 | 5.813433953   | 4.255332133   | -0.250564460 | H |
| 291 | 6.315580420   | 6.893476942   | 1.149326776  | H |
| 292 | 5.707582160   | 7.575865540   | -3.015811338 | H |
| 293 | 4.491874914   | 5.275511392   | 0.411254937  | H |
| 294 | 7.489142681   | 7.371404603   | 0.114592944  | H |
| 295 | 6.198253891   | 2.192412916   | -6.253711289 | H |
| 296 | 6.587187530   | 6.109823498   | -1.668507150 | H |
| 297 | 4.128307501   | -7.365310526  | 5.286759694  | H |
| 298 | 6.013763004   | -8.488736843  | 3.145829263  | H |
| 299 | 4.296338828   | 0.962139600   | -6.460044840 | H |
| 300 | 4.529076606   | -0.422117365  | 3.779652586  | H |
| 301 | 1.425526960   | 1.483883152   | -8.450051347 | H |
| 302 | -1.267820637  | -2.228827837  | -4.247896949 | H |
| 303 | 1.153029811   | 2.041616867   | -6.799760353 | H |
| 304 | 3.414828281   | -4.828053690  | 4.738513800  | H |
| 305 | 2.569253335   | -0.097827186  | -6.168013564 | H |
| 306 | 3.268145698   | -5.281126831  | 3.040700784  | H |
| 307 | 3.776345851   | -7.602281502  | 3.559839352  | H |
| 308 | 5.691079362   | -5.966014596  | 3.031468825  | H |
| 309 | 5.792104507   | -5.603933675  | 4.763672811  | H |
| 310 | -4.681955009  | -0.325741905  | -6.892441102 | H |
| 311 | 4.530052380   | -9.867560998  | 5.353184830  | H |
| 312 | 3.609200637   | -12.253005471 | 3.668724814  | H |
| 313 | 0.335412049   | -0.361935646  | -3.800695471 | H |
| 314 | 4.704062980   | -12.210861319 | 6.371350888  | H |
| 315 | 3.162686372   | -12.449444082 | 5.871368643  | H |

|     |              |               |              |   |
|-----|--------------|---------------|--------------|---|
| 316 | 4.897569640  | -3.589182468  | 2.448770562  | H |
| 317 | -0.105416623 | 1.889002981   | -4.691310912 | H |
| 318 | -3.252390010 | -1.832830479  | -5.681333628 | H |
| 319 | 6.690487877  | -10.640698551 | -1.011531881 | H |
| 320 | 6.079775865  | -8.190749318  | -3.096165559 | H |
| 321 | 5.713897933  | -8.796849562  | 0.457959239  | H |
| 322 | 5.859179881  | -11.145304876 | -2.221334555 | H |
| 323 | 5.760837719  | 2.293240468   | -9.028816678 | H |
| 324 | 5.818665446  | -5.630292510  | 0.280288451  | H |
| 325 | 1.323601943  | -7.879264815  | 1.032396432  | H |
| 326 | 3.706693275  | -2.311649622  | -7.164161295 | H |
| 327 | 2.117606683  | -9.392290971  | -0.543356813 | H |
| 328 | 2.912169099  | -7.225135636  | -6.666965209 | H |
| 329 | 2.073666357  | -5.638163352  | -4.883356209 | H |
| 330 | 5.150244871  | -12.940771343 | 4.193121730  | H |
| 331 | 4.922407835  | -1.336576566  | 2.340406020  | H |
| 332 | 7.666126408  | -6.616249143  | 1.439944168  | H |
| 333 | 6.844214002  | -4.471024416  | 0.390009318  | H |
| 334 | 8.016541006  | -7.706142895  | 3.515612890  | H |
| 335 | 3.290837515  | -3.133842523  | 5.638550039  | H |
| 336 | 3.190968896  | -8.559862679  | -3.291194258 | H |
| 337 | 4.226203339  | -9.004051174  | -1.928497368 | H |
| 338 | 1.152597544  | -8.774022105  | -1.893841038 | H |
| 339 | 1.643060864  | -2.242384635  | -5.873422213 | H |
| 340 | -2.089420250 | 2.294254419   | -6.173463169 | H |
| 341 | -4.370255921 | 1.426057703   | -6.960336142 | H |
| 342 | 1.610441815  | -6.134358325  | 0.883618730  | H |
| 343 | 7.641573087  | -8.162184739  | 1.277902192  | H |
| 344 | 6.307435240  | -9.949208629  | 1.308231520  | H |
| 345 | 3.261437722  | -1.450681951  | 5.450693270  | H |
| 346 | 5.263912781  | -8.116614795  | -6.142573238 | H |
| 347 | 6.139426311  | -6.526905317  | -2.534397059 | H |
| 348 | 0.803476293  | -2.954039518  | -7.281012652 | H |
| 349 | 5.220926176  | 3.672782434   | -6.361733909 | H |
| 350 | 7.279252429  | -0.656122173  | 4.690038910  | H |
| 351 | 7.530773251  | -0.245327869  | 2.979226575  | H |
| 352 | 8.714980264  | -7.700638161  | -5.622464909 | H |
| 353 | 7.777504537  | -8.848696374  | -4.928549464 | H |
| 354 | 9.516776153  | -9.533262248  | -0.822732456 | H |
| 355 | 7.900585634  | -9.017247354  | -2.345613647 | H |
| 356 | 11.172607631 | -8.643597819  | -2.813832708 | H |
| 357 | 9.488725721  | -7.816948255  | -0.364963274 | H |
| 358 | 10.163794101 | -0.786920537  | 3.210322039  | H |
| 359 | -2.074943484 | 13.410632483  | 3.566977645  | H |
| 360 | 8.963631449  | -7.841630897  | 6.372539449  | H |
| 361 | 8.716610855  | -5.376669657  | 5.176389976  | H |
| 362 | -3.695299358 | 12.725565939  | 1.113063664  | H |
| 363 | -3.512281604 | 10.660097718  | 3.394315404  | H |
| 364 | -4.976464434 | 11.514541309  | 2.869375348  | H |
| 365 | -5.635581248 | 7.365265907   | -2.047478914 | H |
| 366 | 0.243455112  | -1.127511239  | 0.093384856  | H |
| 367 | 3.525108871  | -4.627559807  | -2.039051145 | H |
| Mo  |              |               |              |   |
| 368 | -7.698897633 | -6.512846609  | -0.873417694 | N |
| 369 | -9.333155277 | -3.815896664  | 1.138101253  | N |
| 370 | -8.832308271 | -4.093267569  | 3.889869731  | N |
| 371 | -6.228266842 | -5.158233201  | 4.007597570  | N |
| 372 | -4.665354164 | -2.948622211  | 3.139032406  | N |
| 373 | -5.191004930 | -1.153607406  | 5.310815555  | N |
| 374 | -4.467077105 | -2.581558319  | 7.740996937  | N |
| 375 | -2.080900868 | -4.069363222  | 7.198996740  | N |
| 376 | -0.389278378 | -2.658627277  | 5.330006523  | N |
| 377 | -0.287004916 | 0.180873358   | 6.124546276  | N |
| 378 | -0.877820875 | 0.147705095   | 9.044560240  | N |
| 379 | 3.999195433  | -11.888305210 | 5.705055549  | N |
| 380 | 5.050694200  | -9.738960052  | 4.479303819  | N |
| 381 | 4.480848864  | -3.619087956  | 3.381484003  | N |
| 382 | 0.884245464  | 1.666714856   | -0.821915651 | N |
| 383 | 0.156709997  | 2.469568722   | -0.520050916 | N |
| 384 | 3.762423641  | -2.328570423  | 5.224134934  | N |
| 385 | 4.481932568  | -1.305153934  | 3.277704342  | N |
| 386 | 7.973861953  | -7.818379847  | 4.552886183  | N |
| 387 | -5.887979029 | -2.434542378  | -3.368358364 | N |
| 388 | -2.224612856 | -5.429690101  | -3.268002016 | N |
| 389 | -5.904122094 | 0.085078554   | -2.618453944 | N |
| 390 | -8.147975958 | 1.444013645   | -1.656302893 | N |
| 391 | -7.897117962 | 1.097918111   | 1.121676312  | N |
| 392 | -5.661154109 | 2.653187906   | 1.858765200  | N |
| 393 | -2.870301516 | 2.809355034   | -1.217517449 | N |
| 394 | -2.423229157 | 0.711814240   | -0.617151198 | N |
| 395 | -6.137486705 | 5.303595516   | 2.415771691  | N |
| 396 | -9.181923228 | 8.615221449   | 0.877939322  | N |

|     |              |               |               |   |
|-----|--------------|---------------|---------------|---|
| 397 | -9.032989893 | 10.362423474  | 2.237798735   | N |
| 398 | 9.383063913  | 1.693276801   | 3.396324431   | N |
| 399 | 6.875044160  | 6.585404978   | 0.347441807   | N |
| 400 | 5.096119748  | 8.021928115   | -2.336555750  | N |
| 401 | 2.445630481  | 7.631975590   | -3.029268545  | N |
| 402 | -2.205646001 | 6.630831043   | -4.665720620  | N |
| 403 | -2.107467436 | 8.489859226   | -6.085105246  | N |
| 404 | -3.337469321 | 8.580535123   | -4.119621261  | N |
| 405 | 1.178568863  | 6.190772232   | -0.886563321  | N |
| 406 | 1.498502211  | 8.060953092   | 1.164209560   | N |
| 407 | 0.502131985  | 10.581830326  | 0.741406102   | N |
| 408 | -0.717143746 | 10.471625999  | -3.064048527  | N |
| 409 | -1.856895071 | 11.812923070  | 1.575302289   | N |
| 410 | 4.430342223  | -5.049041906  | -9.834994080  | N |
| 411 | 2.860061696  | -2.785047637  | -7.493438413  | N |
| 412 | 2.004566775  | 0.122349796   | -7.000909836  | N |
| 413 | 4.267372096  | 1.867007851   | -6.940874336  | N |
| 414 | -1.034419840 | -2.854456285  | -10.140688076 | N |
| 415 | -2.591206014 | -0.872538492  | -8.777474114  | N |
| 416 | 7.784989253  | -7.868706129  | -5.227677216  | N |
| 417 | 3.978841364  | -6.003952037  | -3.932252636  | N |
| 418 | 3.463764765  | -6.946268324  | -5.859768507  | N |
| 419 | 8.643280665  | -8.319459401  | -2.255032512  | N |
| 420 | -7.177833462 | -4.551601326  | 1.167349066   | O |
| 421 | -7.733144473 | -2.096413712  | 3.883706149   | O |
| 422 | -6.111679261 | -4.560605973  | 6.209154106   | O |
| 423 | -3.006734356 | -3.746775186  | 4.477681256   | O |
| 424 | -3.105704135 | -0.320985443  | 4.932518166   | O |
| 425 | -3.691162770 | -0.558602289  | 8.468474322   | O |
| 426 | -1.560965044 | -3.949599856  | 9.433615239   | O |
| 427 | 1.388479369  | -3.765189087  | 6.270751079   | O |
| 428 | 1.950059022  | -0.163736910  | 5.814155452   | O |
| 429 | 1.057668650  | 1.328283098   | 9.135758406   | O |
| 430 | 0.981237301  | -0.690517870  | 11.991690781  | O |
| 431 | 5.841802743  | -10.974347147 | 2.690094906   | O |
| 432 | 6.661094556  | -8.314624774  | 6.373654407   | O |
| 433 | 10.699353921 | -5.696261724  | 5.530558072   | O |
| 434 | -5.867869994 | -0.404020832  | -0.371745844  | O |
| 435 | -3.853890333 | -4.188442460  | -4.253965757  | O |
| 436 | -6.807398127 | 3.167937392   | -0.995706331  | O |
| 437 | -5.725440550 | 3.559331965   | -3.847354455  | O |
| 438 | -9.730520107 | 2.438570351   | 1.464333990   | O |
| 439 | -5.866706425 | 1.996500047   | 4.036183439   | O |
| 440 | -4.177311296 | 5.453514724   | 3.571472564   | O |
| 441 | -6.434374371 | 7.808309248   | 4.894642847   | O |
| 442 | 10.269871877 | -1.166186027  | 5.213654023   | O |
| 443 | 3.487177411  | 4.198387279   | 4.318294848   | O |
| 444 | 4.322905351  | 8.018082663   | -0.190480293  | O |
| 445 | 2.112947068  | 9.880435472   | -3.376148528  | O |
| 446 | -0.730592397 | 7.259891550   | -1.553003426  | O |
| 447 | -0.391912360 | 7.236781453   | 2.171482547   | O |
| 448 | 2.599059600  | 5.441861358   | 1.829160602   | O |
| 449 | 1.675959531  | 11.436669284  | 2.517175646   | O |
| 450 | -1.268173641 | 13.779066807  | 0.581743509   | O |
| 451 | -2.163434786 | 11.335822470  | -1.519230200  | O |
| 452 | -3.979410525 | 14.113375033  | 3.337445986   | O |
| 453 | -4.723161200 | 7.308273550   | -1.703709378  | O |
| 454 | 2.022523984  | -4.660622444  | -8.523411900  | O |
| 455 | 0.461814266  | -0.726551962  | -8.467546482  | O |
| 456 | 3.077279870  | 3.472033741   | -8.025206821  | O |
| 457 | 6.846495501  | 3.910199904   | -8.414254426  | O |
| 458 | -4.395618300 | -2.164840207  | -9.300662397  | O |
| 459 | -1.588650183 | -6.476007513  | -6.107272474  | O |
| 460 | 0.445010547  | -5.765438903  | -6.689584292  | O |
| 461 | -2.933777002 | 2.672894168   | -8.665097021  | O |
| 462 | 9.606385351  | -6.356082754  | -2.844782661  | O |
| 463 | 12.006334275 | -8.109934329  | -1.029909854  | O |
| 464 | -0.259148919 | -6.159177626  | -1.274026344  | O |
| 465 | -1.093735530 | -7.091051926  | 0.608229229   | O |
| 466 | 4.232692284  | -11.310815475 | -2.863340277  | O |
| 467 | 1.991996381  | -11.098286270 | -3.087429805  | O |
| 468 | 4.473428336  | -6.188705570  | -0.823304526  | O |
| 469 | 4.164085670  | -7.920591799  | 0.573566720   | O |
| 470 | 2.075792548  | -6.269043438  | -1.837791864  | O |
| 471 | 8.136012080  | -7.433184878  | 1.743132909   | O |
| 472 | 6.519298226  | -5.253332437  | 0.873566783   | O |
| 473 | -3.741545951 | 5.117420308   | -2.777717595  | O |
| 474 | 6.791206772  | -11.146321669 | -1.849469821  | O |
| 475 | 6.529824280  | -9.357070916  | 0.544286940   | O |
| 476 | 4.032567283  | 4.608939171   | -1.882705324  | S |
| 477 | 2.478427292  | 1.675789423   | -3.224545927  | S |
| 478 | 2.041773479  | -3.400140760  | -3.460477372  | S |

|                        |     |              |                             |              |   |
|------------------------|-----|--------------|-----------------------------|--------------|---|
|                        | 479 | 3.498941440  | 1.396870022                 | 0.268073775  | S |
|                        | 480 | 0.413261282  | -1.178302889                | -1.251829432 | S |
|                        | 481 | 4.597328137  | -1.055271273                | -5.098841390 | S |
|                        | 482 | 2.916638337  | -3.610070896                | 0.071841925  | S |
|                        | 483 | 5.976962417  | 1.282704087                 | -2.296121342 | S |
|                        | 484 | 5.626037458  | -3.633701686                | -2.504785770 | S |
|                        | 485 | 6.057385838  | -1.420335594                | 0.416179553  | S |
|                        | end |              |                             |              |   |
| <b>core-S2BH</b>       |     |              | <b>cores2bh2n2xdb.car_4</b> |              |   |
| <b>2N2 dissociated</b> | 1   | -8.321848057 | -4.653890870                | 0.735794797  |   |
| <b>35, S=3/2</b>       | C   |              |                             |              |   |
|                        | 2   | -8.749376109 | -5.758102111                | -0.237913480 |   |
|                        | C   |              |                             |              |   |
| <b>Fe( 139) -2.401</b> | 3   | -9.027015363 | -2.626565701                | 1.931262373  |   |
| <b>Fe( 140) -2.213</b> | C   |              |                             |              |   |
| <b>Fe( 141) -2.454</b> | 4   | -8.471770543 | -2.915849849                | 3.322938551  |   |
| <b>Fe( 142) 2.810</b>  | C   |              |                             |              |   |
| <b>Fe( 143) 2.933</b>  | 5   | -8.287880801 | -4.496114617                | 5.177798123  |   |
| <b>Fe( 144) 2.218</b>  | C   |              |                             |              |   |
| <b>Fe( 145) 1.901</b>  | 6   | -6.775427381 | -4.737902723                | 5.175470628  |   |
|                        | C   |              |                             |              |   |
|                        | 7   | -4.784451816 | -5.288354780                | 3.8711150520 |   |
|                        | C   |              |                             |              |   |
|                        | 8   | -4.069158365 | -3.935752183                | 3.852289587  |   |
|                        | C   |              |                             |              |   |
|                        | 9   | -4.134530723 | -1.601882422                | 3.133414477  |   |
|                        | C   |              |                             |              |   |
|                        | 10  | -4.093161354 | -0.970417457                | 4.533983704  |   |
|                        | C   |              |                             |              |   |
|                        | 11  | -5.260996418 | -0.544974712                | 6.619269166  |   |
|                        | C   |              |                             |              |   |
|                        | 12  | -4.389264425 | -1.232382376                | 7.678393248  |   |
|                        | C   |              |                             |              |   |
|                        | 13  | -3.794801094 | -3.335076327                | 8.784525392  |   |
|                        | C   |              |                             |              |   |
|                        | 14  | -2.359096452 | -3.795494577                | 8.493935374  |   |
|                        | C   |              |                             |              |   |
|                        | 15  | -0.796901804 | -4.608314731                | 6.769489955  |   |
|                        | C   |              |                             |              |   |
|                        | 16  | 0.168758935  | -3.624428984                | 6.098430653  |   |
|                        | C   |              |                             |              |   |
|                        | 17  | 0.429457595  | -1.660324906                | 4.617996675  |   |
|                        | C   |              |                             |              |   |
|                        | 18  | 0.769539201  | -0.486136420                | 5.565476973  |   |
|                        | C   |              |                             |              |   |
|                        | 19  | -0.235968795 | -1.202560336                | 3.306536817  |   |
|                        | C   |              |                             |              |   |
|                        | 20  | 0.567763385  | -0.069485841                | 2.658466569  |   |
|                        | C   |              |                             |              |   |
|                        | 21  | -0.410271583 | -2.399753290                | 2.363009399  |   |
|                        | C   |              |                             |              |   |
|                        | 22  | -0.108712586 | 1.331642548                 | 6.989563667  |   |
|                        | C   |              |                             |              |   |
|                        | 23  | 0.079903379  | 0.923126743                 | 8.465971872  |   |
|                        | C   |              |                             |              |   |
|                        | 24  | -1.254718126 | 2.356724594                 | 6.801287519  |   |
|                        | C   |              |                             |              |   |
|                        | 25  | -1.134483770 | 3.511064766                 | 7.803314555  |   |
|                        | C   |              |                             |              |   |
|                        | 26  | -1.270337902 | 2.893155706                 | 5.364191234  |   |
|                        | C   |              |                             |              |   |
|                        | 27  | -0.807547053 | -0.169323486                | 10.446240462 |   |
|                        | C   |              |                             |              |   |
|                        | 28  | 0.523914446  | -0.774166404                | 10.842512241 |   |
|                        | C   |              |                             |              |   |
|                        | 29  | 4.467472652  | -12.078115710               | 4.326427954  |   |
|                        | C   |              |                             |              |   |
|                        | 30  | 5.199680761  | -10.864521696               | 3.757162977  |   |
|                        | C   |              |                             |              |   |
|                        | 31  | 5.643238977  | -8.443335550                | 4.177920819  |   |
|                        | C   |              |                             |              |   |
|                        | 32  | 6.812706616  | -8.186268849                | 5.147859884  |   |
|                        | C   |              |                             |              |   |
|                        | 33  | 4.575297524  | -7.341078816                | 4.279314251  |   |
|                        | C   |              |                             |              |   |
|                        | 34  | 5.119964935  | -5.944949198                | 3.971781244  |   |
|                        | C   |              |                             |              |   |
|                        | 35  | 3.991310904  | -4.927383785                | 3.810197524  |   |
|                        | C   |              |                             |              |   |
|                        | 36  | 4.248833856  | -2.431282160                | 3.969544356  |   |
|                        | C   |              |                             |              |   |

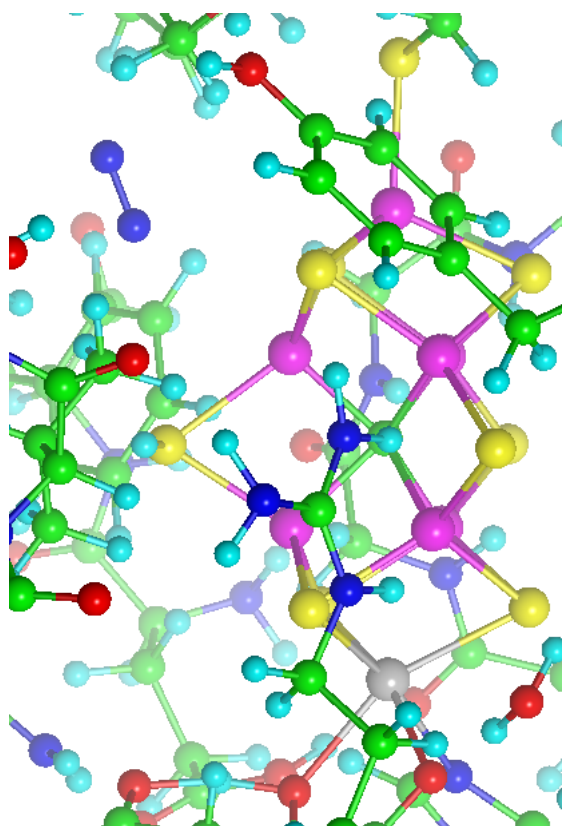

|  |    |              |              |              |
|--|----|--------------|--------------|--------------|
|  | 37 | 9.173360104  | -7.552931588 | 5.325959601  |
|  | C  |              |              |              |
|  | 38 | 9.561591792  | -6.090310790 | 5.336153514  |
|  | C  |              |              |              |
|  | 39 | -5.457551497 | -2.209691126 | -1.983451143 |
|  | C  |              |              |              |
|  | 40 | -5.770225113 | -0.760923929 | -1.564209467 |
|  | C  |              |              |              |
|  | 41 | -3.953292930 | -2.491305306 | -1.788109235 |
|  | C  |              |              |              |
|  | 42 | -3.562961040 | -3.984375026 | -1.838317747 |
|  | C  |              |              |              |
|  | 43 | -3.215367507 | -4.534906891 | -3.221485021 |
|  | C  |              |              |              |
|  | 44 | -5.868412879 | 1.534004665  | -2.503363573 |
|  | C  |              |              |              |
|  | 45 | -6.998644962 | 2.131142755  | -1.661369003 |
|  | C  |              |              |              |
|  | 46 | -5.827153644 | 2.118243832  | -3.922535741 |
|  | C  |              |              |              |
|  | 47 | -9.267077620 | 1.844190121  | -0.796262445 |
|  | C  |              |              |              |
|  | 48 | -8.974469275 | 1.831302253  | 0.709185821  |
|  | C  |              |              |              |
|  | 49 | -7.487305739 | 1.107475201  | 2.516364438  |
|  | C  |              |              |              |
|  | 50 | -6.271918332 | 1.962213446  | 2.876767167  |
|  | C  |              |              |              |
|  | 51 | -4.512495923 | 3.504788653  | 2.161907022  |
|  | C  |              |              |              |
|  | 52 | -4.912593531 | 4.831395988  | 2.825818015  |
|  | C  |              |              |              |
|  | 53 | -3.737747979 | 3.862683602  | 0.883028338  |
|  | C  |              |              |              |
|  | 54 | -3.243832492 | 2.673922939  | 0.130242970  |
|  | C  |              |              |              |
|  | 55 | -2.976740174 | 1.368619173  | 0.493005917  |
|  | C  |              |              |              |
|  | 56 | -2.555462689 | 1.478621847  | -1.609822766 |
|  | C  |              |              |              |
|  | 57 | -6.554011469 | 6.655942964  | 2.752952361  |
|  | C  |              |              |              |
|  | 58 | -6.605397142 | 6.791535160  | 4.273554110  |
|  | C  |              |              |              |
|  | 59 | -7.966874247 | 6.844335452  | 2.150374998  |
|  | C  |              |              |              |
|  | 60 | -8.463402630 | 8.253622288  | 2.019397946  |
|  | C  |              |              |              |
|  | 61 | -8.367364072 | 9.332574136  | 2.876784240  |
|  | C  |              |              |              |
|  | 62 | -9.497465634 | 9.893176754  | 1.054327224  |
|  | C  |              |              |              |
|  | 63 | 8.947959728  | 0.677785560  | 4.344346977  |
|  | C  |              |              |              |
|  | 64 | 9.880017279  | -0.514363722 | 4.247521091  |
|  | C  |              |              |              |
|  | 65 | 7.525984166  | 0.169787616  | 3.989794520  |
|  | C  |              |              |              |
|  | 66 | 6.471689955  | 1.246149337  | 4.100214863  |
|  | C  |              |              |              |
|  | 67 | 5.810308528  | 1.489785659  | 5.317587150  |
|  | C  |              |              |              |
|  | 68 | 6.113156707  | 2.027094653  | 2.987763141  |
|  | C  |              |              |              |
|  | 69 | 4.816039473  | 2.467357124  | 5.423675626  |
|  | C  |              |              |              |
|  | 70 | 5.131179686  | 3.014080339  | 3.080929258  |
|  | C  |              |              |              |
|  | 71 | 4.478089772  | 3.226951711  | 4.298593819  |
|  | C  |              |              |              |
|  | 72 | 5.963833645  | 6.322345185  | -0.785926615 |
|  | C  |              |              |              |
|  | 73 | 5.052781973  | 7.528507290  | -1.067812875 |
|  | C  |              |              |              |
|  | 74 | 5.120686947  | 5.087526235  | -0.469216377 |
|  | C  |              |              |              |
|  | 75 | 4.319518317  | 9.183437719  | -2.749008722 |
|  | C  |              |              |              |
|  | 76 | 2.849069119  | 8.919065013  | -3.082408780 |
|  | C  |              |              |              |
|  | 77 | 1.070939680  | 7.171041964  | -3.165691360 |
|  | C  |              |              |              |



|  |     |              |              |              |
|--|-----|--------------|--------------|--------------|
|  | 78  | 0.432795153  | 6.881274802  | -1.780622100 |
|  | C   |              |              |              |
|  | 79  | 1.101597775  | 5.931655614  | -4.092471687 |
|  | C   |              |              |              |
|  | 80  | -0.194045261 | 5.162326456  | -4.378880569 |
|  | C   |              |              |              |
|  | 81  | -1.188818389 | 5.818208627  | -5.350497786 |
|  | C   |              |              |              |
|  | 82  | -2.566804766 | 7.865933016  | -4.975080011 |
|  | C   |              |              |              |
|  | 83  | 0.661326880  | 5.931075678  | 0.465176218  |
|  | C   |              |              |              |
|  | 84  | 0.545371981  | 7.168335064  | 1.358032281  |
|  | C   |              |              |              |
|  | 85  | 1.495777259  | 4.883384708  | 1.236378087  |
|  | C   |              |              |              |
|  | 86  | 1.782188297  | 9.092750775  | 2.206890751  |
|  | C   |              |              |              |
|  | 87  | 1.331011124  | 10.494968774 | 1.841734670  |
|  | C   |              |              |              |
|  | 88  | 0.208362857  | 11.886998230 | 0.193800015  |
|  | C   |              |              |              |
|  | 89  | -1.050072906 | 12.566020011 | 0.787122864  |
|  | C   |              |              |              |
|  | 90  | 0.176688697  | 11.926629736 | -1.336744307 |
|  | C   |              |              |              |
|  | 91  | -1.012284596 | 11.207907617 | -1.963565837 |
|  | C   |              |              |              |
|  | 92  | -3.169510450 | 12.273646661 | 1.977431451  |
|  | C   |              |              |              |
|  | 93  | -3.050320514 | 13.356187737 | 3.040025209  |
|  | C   |              |              |              |
|  | 94  | -4.019589979 | 11.088845239 | 2.517853855  |
|  | C   |              |              |              |
|  | 95  | -4.260259160 | 10.031179555 | 1.465458800  |
|  | C   |              |              |              |
|  | 96  | -5.367621332 | 10.116261000 | 0.607278076  |
|  | C   |              |              |              |
|  | 97  | -3.355959193 | 8.972203006  | 1.275582747  |
|  | C   |              |              |              |
|  | 98  | -5.554072391 | 9.193264019  | -0.425178412 |
|  | C   |              |              |              |
|  | 99  | -3.509052762 | 8.058772947  | 0.229261769  |
|  | C   |              |              |              |
|  | 100 | -4.606361226 | 8.187644160  | -0.619347898 |
|  | C   |              |              |              |
|  | 101 | 4.412124137  | -4.328227468 | -8.574724995 |
|  | C   |              |              |              |
|  | 102 | 2.993061035  | -3.928351044 | -8.207882010 |
|  | C   |              |              |              |
|  | 103 | 1.610807862  | -2.270700563 | -6.976927526 |
|  | C   |              |              |              |
|  | 104 | 1.299315562  | -0.884908441 | -7.549627534 |
|  | C   |              |              |              |
|  | 105 | 1.869303622  | 1.501610590  | -7.439868885 |
|  | C   |              |              |              |
|  | 106 | 3.136205126  | 2.348624651  | -7.499652371 |
|  | C   |              |              |              |
|  | 107 | 5.454853262  | 2.712282129  | -6.875094593 |
|  | C   |              |              |              |
|  | 108 | 6.052415392  | 3.011526001  | -8.235639853 |
|  | C   |              |              |              |
|  | 109 | -2.216242679 | -3.241255655 | -9.383746118 |
|  | C   |              |              |              |
|  | 110 | -3.154546137 | -2.046483130 | -9.170334388 |
|  | C   |              |              |              |
|  | 111 | -1.976627812 | -3.959575434 | -8.034923956 |
|  | C   |              |              |              |
|  | 112 | -1.383729240 | -5.365990031 | -8.244053127 |
|  | C   |              |              |              |
|  | 113 | -0.869580258 | -5.927326215 | -6.936748965 |
|  | C   |              |              |              |
|  | 114 | -3.394582702 | 0.299257607  | -8.525707454 |
|  | C   |              |              |              |
|  | 115 | -2.734503152 | 1.539269590  | -9.093029426 |
|  | C   |              |              |              |
|  | 116 | -3.894352938 | 0.435043946  | -7.067384917 |
|  | C   |              |              |              |
|  | 117 | -2.789162923 | 0.247468909  | -6.061302121 |
|  | C   |              |              |              |
|  | 118 | -1.909652649 | 1.298111683  | -5.744951955 |
|  | C   |              |              |              |

|     |               |               |              |
|-----|---------------|---------------|--------------|
| 119 | -2.560176337  | -1.018532830  | -5.499711142 |
| C   |               |               |              |
| 120 | -0.802622134  | 1.068060155   | -4.923424151 |
| C   |               |               |              |
| 121 | -1.448337321  | -1.249966649  | -4.683394350 |
| C   |               |               |              |
| 122 | -0.557962167  | -0.209295396  | -4.410324824 |
| C   |               |               |              |
| 123 | 7.604565847   | -7.009659396  | -4.067729097 |
| C   |               |               |              |
| 124 | 8.695201579   | -7.197702288  | -3.004065374 |
| C   |               |               |              |
| 125 | 6.212853523   | -7.164257831  | -3.437816022 |
| C   |               |               |              |
| 126 | 5.047064881   | -6.855417257  | -4.320842045 |
| C   |               |               |              |
| 127 | 4.735140382   | -7.437832562  | -5.532340482 |
| C   |               |               |              |
| 128 | 3.049344688   | -6.162031083  | -4.877635162 |
| C   |               |               |              |
| 129 | 9.639524937   | -8.516481069  | -1.205817518 |
| C   |               |               |              |
| 130 | 11.054492069  | -8.389673486  | -1.725737897 |
| C   |               |               |              |
| 131 | -0.130842589  | -6.773442909  | -0.103207483 |
| C   |               |               |              |
| 132 | 1.313581625   | -7.049801018  | 0.339904362  |
| C   |               |               |              |
| 133 | 2.311363948   | -7.297994499  | -0.823691003 |
| C   |               |               |              |
| 134 | 2.137004747   | -8.727641379  | -1.395266158 |
| C   |               |               |              |
| 135 | 3.231978509   | -9.183269568  | -2.364019514 |
| C   |               |               |              |
| 136 | 3.134641637   | -10.664713959 | -2.794436122 |
| C   |               |               |              |
| 137 | 3.749029497   | -7.154526379  | -0.304821096 |
| C   |               |               |              |
| 138 | 3.628309968   | -1.057258694  | -1.826540151 |
| C   |               |               |              |
| 139 | 4.020370754   | -2.337806142  | -3.396197970 |
| Fe  |               |               |              |
| 140 | 2.293414965   | 0.255559823   | -1.455595061 |
| Fe  |               |               |              |
| 141 | 4.823826120   | 0.069244468   | -0.729066034 |
| Fe  |               |               |              |
| 142 | 4.170463848   | 0.217627408   | -3.274689041 |
| Fe  |               |               |              |
| 143 | 3.899956787   | 2.356242457   | -1.649031936 |
| Fe  |               |               |              |
| 144 | 4.620175196   | -2.513134500  | -0.874017251 |
| Fe  |               |               |              |
| 145 | 2.206337400   | -2.343131684  | -1.593297240 |
| Fe  |               |               |              |
| 146 | -7.054850496  | -6.891352038  | -0.155026239 |
| H   |               |               |              |
| 147 | -7.099558358  | -5.882952694  | -1.436523115 |
| H   |               |               |              |
| 148 | -10.221836882 | -3.866144218  | 0.673020092  |
| H   |               |               |              |
| 149 | -9.393007759  | -5.310314340  | -1.012329555 |
| H   |               |               |              |
| 150 | -9.392435353  | -6.454770538  | 0.326777190  |
| H   |               |               |              |
| 151 | -8.287070380  | -1.986928138  | 1.427333010  |
| H   |               |               |              |
| 152 | -9.431917634  | -4.724217236  | 3.370600416  |
| H   |               |               |              |
| 153 | -9.955550316  | -2.050933244  | 2.042961607  |
| H   |               |               |              |
| 154 | -8.789358155  | -5.421889656  | 5.489996491  |
| H   |               |               |              |
| 155 | -6.793635596  | -5.178581420  | 3.158701013  |
| H   |               |               |              |
| 156 | -8.482821101  | -3.727537012  | 5.937330575  |
| H   |               |               |              |
| 157 | -3.111172394  | -1.593011845  | 2.741758486  |
| H   |               |               |              |
| 158 | -5.514901824  | -3.162164132  | 2.611842948  |
| H   |               |               |              |
| 159 | -4.571228348  | -5.823427682  | 2.936046936  |
| H   |               |               |              |

|  |     |              |              |              |
|--|-----|--------------|--------------|--------------|
|  | 160 | -4.935478694 | 0.501595511  | 6.565588413  |
|  | H   |              |              |              |
|  | 161 | -6.027479683 | -1.586946681 | 4.899729321  |
|  | H   |              |              |              |
|  | 162 | -4.371344132 | -5.866893457 | 4.705904562  |
|  | H   |              |              |              |
|  | 163 | -4.758172010 | -0.993542547 | 2.464127717  |
|  | H   |              |              |              |
|  | 164 | -5.107051765 | -3.090591239 | 7.112458188  |
|  | H   |              |              |              |
|  | 165 | -6.307847696 | -0.567318357 | 6.951872433  |
|  | H   |              |              |              |
|  | 166 | -0.937883739 | -3.232175289 | 2.849551581  |
|  | H   |              |              |              |
|  | 167 | -0.994952557 | -2.113349095 | 1.476771760  |
|  | H   |              |              |              |
|  | 168 | 0.565551698  | -2.778323923 | 2.018324228  |
|  | H   |              |              |              |
|  | 169 | -1.229590566 | -0.802392029 | 3.568448501  |
|  | H   |              |              |              |
|  | 170 | -4.391044078 | -4.232598818 | 9.005712869  |
|  | H   |              |              |              |
|  | 171 | -1.404443237 | 2.089500232  | 4.627022565  |
|  | H   |              |              |              |
|  | 172 | -1.741298981 | -0.100785612 | 8.536124345  |
|  | H   |              |              |              |
|  | 173 | -1.175758223 | 3.170161570  | 8.847897918  |
|  | H   |              |              |              |
|  | 174 | 0.057250753  | 0.294988047  | 1.756348055  |
|  | H   |              |              |              |
|  | 175 | 1.578065398  | -0.399042818 | 2.370362471  |
|  | H   |              |              |              |
|  | 176 | 8.939023531  | 1.009267387  | 5.400323225  |
|  | H   |              |              |              |
|  | 177 | -2.094312881 | 3.610569054  | 5.233616249  |
|  | H   |              |              |              |
|  | 178 | -1.957716970 | 4.223948438  | 7.647752827  |
|  | H   |              |              |              |
|  | 179 | -0.326322035 | 3.415602887  | 5.138131679  |
|  | H   |              |              |              |
|  | 180 | -0.185343887 | 4.052337745  | 7.661078517  |
|  | H   |              |              |              |
|  | 181 | -2.210398952 | 1.833955040  | 6.987156855  |
|  | H   |              |              |              |
|  | 182 | 0.844571682  | 1.803653573  | 6.711560121  |
|  | H   |              |              |              |
|  | 183 | -1.233905031 | -0.089802707 | 5.830201020  |
|  | H   |              |              |              |
|  | 184 | 0.684550448  | 0.792661718  | 3.332029267  |
|  | H   |              |              |              |
|  | 185 | 1.830825391  | 4.097296791  | 0.543369303  |
|  | H   |              |              |              |
|  | 186 | 0.829313166  | 4.428054965  | 1.985106910  |
|  | H   |              |              |              |
|  | 187 | 2.821133941  | 4.987538530  | 2.689269702  |
|  | H   |              |              |              |
|  | 188 | 3.100259228  | 4.243421232  | 5.216822214  |
|  | H   |              |              |              |
|  | 189 | 4.846075379  | 3.598189872  | 2.205727818  |
|  | H   |              |              |              |
|  | 190 | 6.584886157  | 1.841272305  | 2.020044357  |
|  | H   |              |              |              |
|  | 191 | 6.060470197  | 0.892007734  | 6.197887193  |
|  | H   |              |              |              |
|  | 192 | -1.387854687 | -2.693107150 | 5.128936984  |
|  | H   |              |              |              |
|  | 193 | -0.967181927 | -5.439666650 | 6.067437341  |
|  | H   |              |              |              |
|  | 194 | -0.279336843 | -5.001750883 | 7.651502655  |
|  | H   |              |              |              |
|  | 195 | -2.793799818 | -3.945293222 | 6.475949928  |
|  | H   |              |              |              |
|  | 196 | -3.751044619 | -2.721754827 | 9.692957021  |
|  | H   |              |              |              |
|  | 197 | 4.294292674  | 2.622849166  | 6.371462543  |
|  | H   |              |              |              |
|  | 198 | 1.390905451  | -2.130905834 | 4.380162422  |
|  | H   |              |              |              |
|  | 199 | -1.001158988 | 0.712539527  | 11.077789676 |
|  | H   |              |              |              |
|  | 200 | -1.582410721 | -0.921676289 | 10.659274517 |
|  | H   |              |              |              |

|  |     |               |              |               |
|--|-----|---------------|--------------|---------------|
|  | 201 | 1.040475494   | -1.348417557 | 10.038552604  |
|  | H   |               |              |               |
|  | 202 | 10.023293444  | -8.155454341 | 4.970392027   |
|  | H   |               |              |               |
|  | 203 | -1.964249266  | -5.837355243 | -4.170522265  |
|  | H   |               |              |               |
|  | 204 | 0.943027224   | -6.089104446 | -1.687433600  |
|  | H   |               |              |               |
|  | 205 | -2.167234544  | -6.037437327 | -8.622241479  |
|  | H   |               |              |               |
|  | 206 | -0.569801636  | -5.329884020 | -8.982758177  |
|  | H   |               |              |               |
|  | 207 | -2.922363262  | -4.051206449 | -7.478983721  |
|  | H   |               |              |               |
|  | 208 | -2.089602495  | 1.348807954  | -9.982907930  |
|  | H   |               |              |               |
|  | 209 | -2.802685760  | -3.920678609 | -10.020728610 |
|  | H   |               |              |               |
|  | 210 | -3.384298242  | -1.921812572 | -2.538882835  |
|  | H   |               |              |               |
|  | 211 | -4.394133989  | -4.602585938 | -1.454126173  |
|  | H   |               |              |               |
|  | 212 | -1.568412448  | -0.825073863 | -8.611253259  |
|  | H   |               |              |               |
|  | 213 | -4.292943199  | 0.164116882  | -9.162373052  |
|  | H   |               |              |               |
|  | 214 | -0.355704330  | -2.338021241 | -9.561024101  |
|  | H   |               |              |               |
|  | 215 | -1.639763209  | -5.676346207 | -2.441290638  |
|  | H   |               |              |               |
|  | 216 | -1.308554898  | -3.339816706 | -7.416697839  |
|  | H   |               |              |               |
|  | 217 | -0.533775621  | -3.700248526 | -10.463789810 |
|  | H   |               |              |               |
|  | 218 | -6.822132004  | -2.798488605 | -3.420820300  |
|  | H   |               |              |               |
|  | 219 | -3.650503339  | -2.076946452 | -0.816741522  |
|  | H   |               |              |               |
|  | 220 | 0.925371715   | -5.302704037 | -7.445022013  |
|  | H   |               |              |               |
|  | 221 | -2.717279455  | -4.164413023 | -1.159207982  |
|  | H   |               |              |               |
|  | 222 | -3.865555181  | 2.982670812  | 2.880412573   |
|  | H   |               |              |               |
|  | 223 | -3.069980048  | 0.924302978  | 1.481019632   |
|  | H   |               |              |               |
|  | 224 | -8.326609410  | 1.482724603  | 3.118535190   |
|  | H   |               |              |               |
|  | 225 | -7.299252187  | 0.618294688  | 0.447549053   |
|  | H   |               |              |               |
|  | 226 | -6.695466112  | 4.732677368  | 1.818768019   |
|  | H   |               |              |               |
|  | 227 | -7.883212377  | 9.463505342  | 3.838012160   |
|  | H   |               |              |               |
|  | 228 | -6.898112761  | 5.847736273  | 4.794853042   |
|  | H   |               |              |               |
|  | 229 | -8.683182770  | 6.227836387  | 2.723415972   |
|  | H   |               |              |               |
|  | 230 | -5.861093544  | 7.412292052  | 2.351255745   |
|  | H   |               |              |               |
|  | 231 | -10.056858261 | 10.511134564 | 0.357050556   |
|  | H   |               |              |               |
|  | 232 | -2.904853807  | 4.518178733  | 1.186386144   |
|  | H   |               |              |               |
|  | 233 | -4.391143125  | 4.464564988  | 0.231374101   |
|  | H   |               |              |               |
|  | 234 | -9.134103962  | 11.310327564 | 2.602401839   |
|  | H   |               |              |               |
|  | 235 | -7.951249919  | 6.422432964  | 1.133122437   |
|  | H   |               |              |               |
|  | 236 | -5.995557932  | 2.575886217  | 0.910371082   |
|  | H   |               |              |               |
|  | 237 | -7.285689979  | 0.081394195  | 2.857567654   |
|  | H   |               |              |               |
|  | 238 | -9.588301259  | 2.867138336  | -1.035531906  |
|  | H   |               |              |               |
|  | 239 | -2.230307375  | 1.255625404  | -2.622943233  |
|  | H   |               |              |               |
|  | 240 | -10.113931217 | 1.172419034  | -0.987157075  |
|  | H   |               |              |               |
|  | 241 | 10.201522730  | 2.192867831  | 3.770163377   |
|  | H   |               |              |               |

|  |     |              |              |              |
|--|-----|--------------|--------------|--------------|
|  | 242 | 8.654731657  | 2.403134224  | 3.281393511  |
|  | H   |              |              |              |
|  | 243 | 2.084066453  | 5.763403933  | -1.149600133 |
|  | H   |              |              |              |
|  | 244 | -0.357101710 | 5.542602211  | 0.348076098  |
|  | H   |              |              |              |
|  | 245 | 2.328497391  | 7.838127355  | 0.599975387  |
|  | H   |              |              |              |
|  | 246 | -3.060791172 | 3.571004607  | -1.806078761 |
|  | H   |              |              |              |
|  | 247 | -4.481759546 | 4.565357805  | -3.140980321 |
|  | H   |              |              |              |
|  | 248 | -5.867339848 | 3.889569361  | -4.758243638 |
|  | H   |              |              |              |
|  | 249 | -4.129986786 | 5.764182998  | -2.160649058 |
|  | H   |              |              |              |
|  | 250 | -4.957112496 | 1.687013938  | -4.444645510 |
|  | H   |              |              |              |
|  | 251 | -6.743907685 | 1.839817777  | -4.466252698 |
|  | H   |              |              |              |
|  | 252 | 1.132948001  | 11.561419662 | -1.737661389 |
|  | H   |              |              |              |
|  | 253 | 0.085697242  | 12.986544009 | -1.622185776 |
|  | H   |              |              |              |
|  | 254 | 0.252236800  | 10.210406771 | -3.272310172 |
|  | H   |              |              |              |
|  | 255 | -1.475633249 | 9.882697269  | -3.413481581 |
|  | H   |              |              |              |
|  | 256 | -2.374328289 | 9.446044210  | -6.266093782 |
|  | H   |              |              |              |
|  | 257 | -1.708508328 | 5.042024802  | -5.934085413 |
|  | H   |              |              |              |
|  | 258 | -6.429467449 | 9.262894234  | -1.077153048 |
|  | H   |              |              |              |
|  | 259 | -2.512229152 | 8.830989105  | 1.956930797  |
|  | H   |              |              |              |
|  | 260 | -3.663427150 | 8.133260346  | -3.250392629 |
|  | H   |              |              |              |
|  | 261 | 1.815769879  | 5.215345769  | -3.656053360 |
|  | H   |              |              |              |
|  | 262 | 3.155393007  | 6.922252457  | -2.801572690 |
|  | H   |              |              |              |
|  | 263 | -0.709144776 | 4.886093206  | -3.445534371 |
|  | H   |              |              |              |
|  | 264 | -8.201289884 | 0.554220184  | -2.144402031 |
|  | H   |              |              |              |
|  | 265 | 4.788829005  | 9.639377939  | -3.630459094 |
|  | H   |              |              |              |
|  | 266 | -5.813342745 | -0.410867522 | -3.519145422 |
|  | H   |              |              |              |
|  | 267 | 1.544936992  | 6.257420839  | -5.048171506 |
|  | H   |              |              |              |
|  | 268 | -2.762194799 | 7.282287114  | 0.060595014  |
|  | H   |              |              |              |
|  | 269 | 4.320042222  | 9.931613288  | -1.943509777 |
|  | H   |              |              |              |
|  | 270 | -1.780432901 | 7.943139277  | -6.875399290 |
|  | H   |              |              |              |
|  | 271 | -3.902637956 | 9.334879339  | -4.478428000 |
|  | H   |              |              |              |
|  | 272 | -5.229397701 | -3.111314181 | -3.822033854 |
|  | H   |              |              |              |
|  | 273 | -6.010694984 | -2.842151757 | -1.262583842 |
|  | H   |              |              |              |
|  | 274 | -6.102058433 | 10.913418520 | 0.747370503  |
|  | H   |              |              |              |
|  | 275 | -4.948435380 | 1.826609168  | -1.980295719 |
|  | H   |              |              |              |
|  | 276 | 0.480759054  | 7.981669753  | -3.605267835 |
|  | H   |              |              |              |
|  | 277 | -0.643443872 | 6.445578649  | -6.067743495 |
|  | H   |              |              |              |
|  | 278 | 0.117400709  | 4.214598591  | -4.843623741 |
|  | H   |              |              |              |
|  | 279 | -2.739535391 | 6.133500608  | -3.917980363 |
|  | H   |              |              |              |
|  | 280 | 1.261930347  | 8.803366694  | 3.132388922  |
|  | H   |              |              |              |
|  | 281 | 0.391005100  | 9.737650946  | 0.190544318  |
|  | H   |              |              |              |
|  | 282 | 1.024652930  | 12.553192910 | 0.514209383  |
|  | H   |              |              |              |

|  |     |              |               |              |
|--|-----|--------------|---------------|--------------|
|  | 283 | 2.859043516  | 9.137705164   | 2.419296818  |
|  | H   |              |               |              |
|  | 284 | -1.676000381 | 10.798981030  | 1.564842251  |
|  | H   |              |               |              |
|  | 285 | 5.051552730  | -3.435842556  | -8.643839375 |
|  | H   |              |               |              |
|  | 286 | 4.783753692  | -4.921914987  | -7.713774421 |
|  | H   |              |               |              |
|  | 287 | 7.725597302  | -5.976930007  | -4.426253508 |
|  | H   |              |               |              |
|  | 288 | 5.333555440  | -5.512382329  | -9.953940274 |
|  | H   |              |               |              |
|  | 289 | 3.730595634  | -5.800678098  | -9.799604421 |
|  | H   |              |               |              |
|  | 290 | 5.804342960  | 4.252785132   | -0.262715594 |
|  | H   |              |               |              |
|  | 291 | 6.310309284  | 6.892273309   | 1.144959528  |
|  | H   |              |               |              |
|  | 292 | 5.709039478  | 7.585402928   | -3.017663181 |
|  | H   |              |               |              |
|  | 293 | 4.497434136  | 5.278425890   | 0.415524289  |
|  | H   |              |               |              |
|  | 294 | 7.486783425  | 7.365549727   | 0.109985241  |
|  | H   |              |               |              |
|  | 295 | 6.218428546  | 2.183978844   | -6.282642076 |
|  | H   |              |               |              |
|  | 296 | 6.582211389  | 6.115086428   | -1.672955750 |
|  | H   |              |               |              |
|  | 297 | 4.130844271  | -7.363715107  | 5.288405068  |
|  | H   |              |               |              |
|  | 298 | 6.015964084  | -8.488640553  | 3.147823707  |
|  | H   |              |               |              |
|  | 299 | 4.305746174  | 0.962783226   | -6.464352837 |
|  | H   |              |               |              |
|  | 300 | 4.529962085  | -0.418522485  | 3.782903858  |
|  | H   |              |               |              |
|  | 301 | 1.428340179  | 1.487986789   | -8.444646572 |
|  | H   |              |               |              |
|  | 302 | -1.274616639 | -2.243852653  | -4.264729634 |
|  | H   |              |               |              |
|  | 303 | 1.160556051  | 2.046863725   | -6.793971184 |
|  | H   |              |               |              |
|  | 304 | 3.423985532  | -4.823871971  | 4.742768672  |
|  | H   |              |               |              |
|  | 305 | 2.575043697  | -0.095581418  | -6.165664737 |
|  | H   |              |               |              |
|  | 306 | 3.278582860  | -5.274940448  | 3.044174618  |
|  | H   |              |               |              |
|  | 307 | 3.780762213  | -7.597856947  | 3.560591261  |
|  | H   |              |               |              |
|  | 308 | 5.699544211  | -5.964646287  | 3.037166425  |
|  | H   |              |               |              |
|  | 309 | 5.798631894  | -5.605903539  | 4.770548108  |
|  | H   |              |               |              |
|  | 310 | -4.677722256 | -0.320536268  | -6.912839303 |
|  | H   |              |               |              |
|  | 311 | 4.530006381  | -9.866757262  | 5.354093217  |
|  | H   |              |               |              |
|  | 312 | 3.605234187  | -12.248145274 | 3.664176595  |
|  | H   |              |               |              |
|  | 313 | 0.321626701  | -0.376515849  | -3.790487993 |
|  | H   |              |               |              |
|  | 314 | 4.692358268  | -12.212414196 | 6.370706537  |
|  | H   |              |               |              |
|  | 315 | 3.150468547  | -12.440640946 | 5.865650753  |
|  | H   |              |               |              |
|  | 316 | 4.916519771  | -3.587105131  | 2.457655853  |
|  | H   |              |               |              |
|  | 317 | -0.114411281 | 1.878493571   | -4.672912518 |
|  | H   |              |               |              |
|  | 318 | -3.253230643 | -1.838158432  | -5.705322451 |
|  | H   |              |               |              |
|  | 319 | 6.689274056  | -10.645919949 | -1.007916492 |
|  | H   |              |               |              |
|  | 320 | 6.093737281  | -8.202656871  | -3.083078877 |
|  | H   |              |               |              |
|  | 321 | 5.720304131  | -8.798069835  | 0.461980299  |
|  | H   |              |               |              |
|  | 322 | 5.855749280  | -11.154877850 | -2.215578657 |
|  | H   |              |               |              |
|  | 323 | 5.746686617  | 2.314439668   | -9.052456586 |
|  | H   |              |               |              |

|  |     |              |               |              |
|--|-----|--------------|---------------|--------------|
|  | 324 | 5.827958004  | -5.641109884  | 0.267597408  |
|  | H   |              |               |              |
|  | 325 | 1.325489107  | -7.895116903  | 1.038066974  |
|  | H   |              |               |              |
|  | 326 | 3.718294695  | -2.314409064  | -7.173594603 |
|  | H   |              |               |              |
|  | 327 | 2.117729188  | -9.408221020  | -0.529989698 |
|  | H   |              |               |              |
|  | 328 | 2.928908932  | -7.265102668  | -6.670750877 |
|  | H   |              |               |              |
|  | 329 | 2.072308371  | -5.696872626  | -4.882194756 |
|  | H   |              |               |              |
|  | 330 | 5.141846277  | -12.941163219 | 4.192312737  |
|  | H   |              |               |              |
|  | 331 | 4.912380858  | -1.331066301  | 2.336677424  |
|  | H   |              |               |              |
|  | 332 | 7.671730168  | -6.616937436  | 1.443063465  |
|  | H   |              |               |              |
|  | 333 | 6.840252130  | -4.470517208  | 0.396665846  |
|  | H   |              |               |              |
|  | 334 | 8.018654572  | -7.708439790  | 3.516423942  |
|  | H   |              |               |              |
|  | 335 | 3.306017416  | -3.132274941  | 5.645154634  |
|  | H   |              |               |              |
|  | 336 | 3.185931637  | -8.574483561  | -3.279302627 |
|  | H   |              |               |              |
|  | 337 | 4.224412939  | -9.022210448  | -1.919996854 |
|  | H   |              |               |              |
|  | 338 | 1.151171347  | -8.791412202  | -1.880198736 |
|  | H   |              |               |              |
|  | 339 | 1.657983922  | -2.240670253  | -5.877812753 |
|  | H   |              |               |              |
|  | 340 | -2.085597048 | 2.289891039   | -6.170197433 |
|  | H   |              |               |              |
|  | 341 | -4.358001098 | 1.429899874   | -6.975163572 |
|  | H   |              |               |              |
|  | 342 | 1.627849144  | -6.151562394  | 0.897626821  |
|  | H   |              |               |              |
|  | 343 | 7.646381093  | -8.162720430  | 1.278949131  |
|  | H   |              |               |              |
|  | 344 | 6.313497840  | -9.950638638  | 1.311275144  |
|  | H   |              |               |              |
|  | 345 | 3.261630015  | -1.450197662  | 5.448389993  |
|  | H   |              |               |              |
|  | 346 | 5.290792811  | -8.134535428  | -6.147641360 |
|  | H   |              |               |              |
|  | 347 | 6.157068123  | -6.532760879  | -2.543247265 |
|  | H   |              |               |              |
|  | 348 | 0.812735184  | -2.951230375  | -7.281924419 |
|  | H   |              |               |              |
|  | 349 | 5.241672000  | 3.664222205   | -6.365028573 |
|  | H   |              |               |              |
|  | 350 | 7.288660928  | -0.656896879  | 4.676644427  |
|  | H   |              |               |              |
|  | 351 | 7.540624661  | -0.239701380  | 2.967055899  |
|  | H   |              |               |              |
|  | 352 | 8.723361258  | -7.748763635  | -5.619122982 |
|  | H   |              |               |              |
|  | 353 | 7.771411965  | -8.880882057  | -4.920735400 |
|  | H   |              |               |              |
|  | 354 | 9.526898711  | -9.540049126  | -0.815045727 |
|  | H   |              |               |              |
|  | 355 | 7.911262568  | -9.032206343  | -2.342538322 |
|  | H   |              |               |              |
|  | 356 | 11.186410340 | -8.651454673  | -2.803665364 |
|  | H   |              |               |              |
|  | 357 | 9.491590576  | -7.822875844  | -0.362957441 |
|  | H   |              |               |              |
|  | 358 | 10.174007185 | -0.781317543  | 3.203108285  |
|  | H   |              |               |              |
|  | 359 | -2.066525736 | 13.399685798  | 3.563291458  |
|  | H   |              |               |              |
|  | 360 | 8.966166775  | -7.838842274  | 6.372343603  |
|  | H   |              |               |              |
|  | 361 | 8.718690776  | -5.376317294  | 5.171453874  |
|  | H   |              |               |              |
|  | 362 | -3.688357907 | 12.716831158  | 1.110817531  |
|  | H   |              |               |              |
|  | 363 | -3.514217401 | 10.653041601  | 3.393520402  |
|  | H   |              |               |              |
|  | 364 | -4.973636384 | 11.512023716  | 2.862765387  |
|  | H   |              |               |              |

|  |     |              |               |              |
|--|-----|--------------|---------------|--------------|
|  | 365 | -5.627727103 | 7.356229891   | -2.050975771 |
|  | H   |              |               |              |
|  | 366 | 0.484312320  | -1.122321344  | 0.251796154  |
|  | H   |              |               |              |
|  | 367 | 3.517012999  | -4.661490153  | -2.047537985 |
|  | Mo  |              |               |              |
|  | 368 | -7.678253629 | -6.507586348  | -0.869929195 |
|  | N   |              |               |              |
|  | 369 | -9.318373852 | -3.811125937  | 1.137480408  |
|  | N   |              |               |              |
|  | 370 | -8.828225634 | -4.092387109  | 3.891036686  |
|  | N   |              |               |              |
|  | 371 | -6.227826967 | -5.163307287  | 4.010088730  |
|  | N   |              |               |              |
|  | 372 | -4.664845239 | -2.957460510  | 3.133557678  |
|  | N   |              |               |              |
|  | 373 | -5.190951260 | -1.159628044  | 5.303652800  |
|  | N   |              |               |              |
|  | 374 | -4.466657116 | -2.587262326  | 7.733418765  |
|  | N   |              |               |              |
|  | 375 | -2.076284386 | -4.068229598  | 7.192073454  |
|  | N   |              |               |              |
|  | 376 | -0.383306084 | -2.665005317  | 5.312630401  |
|  | N   |              |               |              |
|  | 377 | -0.284701539 | 0.174588823   | 6.107063267  |
|  | N   |              |               |              |
|  | 378 | -0.875737763 | 0.138333631   | 9.026402600  |
|  | N   |              |               |              |
|  | 379 | 3.991436079  | -11.885425244 | 5.702328800  |
|  | N   |              |               |              |
|  | 380 | 5.051053407  | -9.738222306  | 4.480399125  |
|  | N   |              |               |              |
|  | 381 | 4.495814722  | -3.616434497  | 3.388685659  |
|  | N   |              |               |              |
|  | 382 | 0.159268693  | 2.220999167   | -0.615637312 |
|  | N   |              |               |              |
|  | 383 | -0.223312842 | 3.264380189   | -0.615539976 |
|  | N   |              |               |              |
|  | 384 | 3.771554237  | -2.324877466  | 5.228748156  |
|  | N   |              |               |              |
|  | 385 | 4.487986500  | -1.302421313  | 3.282343875  |
|  | N   |              |               |              |
|  | 386 | 7.976152732  | -7.820081899  | 4.553626637  |
|  | N   |              |               |              |
|  | 387 | -5.870226670 | -2.427887346  | -3.377719055 |
|  | N   |              |               |              |
|  | 388 | -2.209664360 | -5.428121682  | -3.263688234 |
|  | N   |              |               |              |
|  | 389 | -5.920369273 | 0.084625795   | -2.619399433 |
|  | N   |              |               |              |
|  | 390 | -8.167157867 | 1.445528966   | -1.654316660 |
|  | N   |              |               |              |
|  | 391 | -7.898589404 | 1.109558478   | 1.125602955  |
|  | N   |              |               |              |
|  | 392 | -5.670863722 | 2.666010565   | 1.875305681  |
|  | N   |              |               |              |
|  | 393 | -2.970101439 | 2.725598520   | -1.223540270 |
|  | N   |              |               |              |
|  | 394 | -2.556018133 | 0.631448613   | -0.590588595 |
|  | N   |              |               |              |
|  | 395 | -6.111068260 | 5.316374421   | 2.412254689  |
|  | N   |              |               |              |
|  | 396 | -9.174251468 | 8.616968628   | 0.885701914  |
|  | N   |              |               |              |
|  | 397 | -9.027516311 | 10.365458485  | 2.243788595  |
|  | N   |              |               |              |
|  | 398 | 9.389867532  | 1.699104327   | 3.391841898  |
|  | N   |              |               |              |
|  | 399 | 6.870208172  | 6.582215337   | 0.344088566  |
|  | N   |              |               |              |
|  | 400 | 5.097796591  | 8.030340708   | -2.337534458 |
|  | N   |              |               |              |
|  | 401 | 2.450628868  | 7.633240459   | -3.029651326 |
|  | N   |              |               |              |
|  | 402 | -2.202502856 | 6.625174043   | -4.663117604 |
|  | N   |              |               |              |
|  | 403 | -2.106203384 | 8.484698179   | -6.081696005 |
|  | N   |              |               |              |
|  | 404 | -3.335969077 | 8.573034945   | -4.115393890 |
|  | N   |              |               |              |
|  | 405 | 1.200651044  | 6.225945154   | -0.864531024 |
|  | N   |              |               |              |



|  |     |              |               |               |
|--|-----|--------------|---------------|---------------|
|  | 406 | 1.531274772  | 8.094129007   | 1.188717154   |
|  | N   |              |               |               |
|  | 407 | 0.517074386  | 10.584177067  | 0.745344337   |
|  | N   |              |               |               |
|  | 408 | -0.721073389 | 10.476974095  | -3.073190542  |
|  | N   |              |               |               |
|  | 409 | -1.851439978 | 11.801103699  | 1.571795356   |
|  | N   |              |               |               |
|  | 410 | 4.426585236  | -5.050636952  | -9.851042001  |
|  | N   |              |               |               |
|  | 411 | 2.869565495  | -2.785650426  | -7.500160935  |
|  | N   |              |               |               |
|  | 412 | 2.008991724  | 0.125433883   | -6.997500335  |
|  | N   |              |               |               |
|  | 413 | 4.277551848  | 1.865171496   | -6.949776319  |
|  | N   |              |               |               |
|  | 414 | -1.020426020 | -2.859625567  | -10.144814640 |
|  | N   |              |               |               |
|  | 415 | -2.576303576 | -0.871773064  | -8.787807162  |
|  | N   |              |               |               |
|  | 416 | 7.790371429  | -7.903146683  | -5.226377555  |
|  | N   |              |               |               |
|  | 417 | 3.981536189  | -6.044173628  | -3.931282065  |
|  | N   |              |               |               |
|  | 418 | 3.476956812  | -6.986514141  | -5.861284216  |
|  | N   |              |               |               |
|  | 419 | 8.654016630  | -8.334003154  | -2.255316704  |
|  | N   |              |               |               |
|  | 420 | -7.162682000 | -4.544564344  | 1.173027802   |
|  | O   |              |               |               |
|  | 421 | -7.732327327 | -2.093503947  | 3.891913846   |
|  | O   |              |               |               |
|  | 422 | -6.111725465 | -4.570350063  | 6.213097138   |
|  | O   |              |               |               |
|  | 423 | -3.005524454 | -3.751941657  | 4.473499562   |
|  | O   |              |               |               |
|  | 424 | -3.106798726 | -0.325466655  | 4.923680859   |
|  | O   |              |               |               |
|  | 425 | -3.690802824 | -0.564549068  | 8.461258892   |
|  | O   |              |               |               |
|  | 426 | -1.559760131 | -3.951978027  | 9.427682421   |
|  | O   |              |               |               |
|  | 427 | 1.393328326  | -3.760139789  | 6.267793216   |
|  | O   |              |               |               |
|  | 428 | 1.952377361  | -0.167054124  | 5.797259294   |
|  | O   |              |               |               |
|  | 429 | 1.060893849  | 1.317184574   | 9.118774417   |
|  | O   |              |               |               |
|  | 430 | 0.975469852  | -0.708829650  | 11.976249736  |
|  | O   |              |               |               |
|  | 431 | 5.841441968  | -10.974659350 | 2.691246290   |
|  | O   |              |               |               |
|  | 432 | 6.664465956  | -8.314832049  | 6.375405621   |
|  | O   |              |               |               |
|  | 433 | 10.701180141 | -5.694621764  | 5.526970417   |
|  | O   |              |               |               |
|  | 434 | -5.884433013 | -0.411272168  | -0.374304511  |
|  | O   |              |               |               |
|  | 435 | -3.845698546 | -4.199253947  | -4.252476184  |
|  | O   |              |               |               |
|  | 436 | -6.826994001 | 3.177005736   | -1.011580846  |
|  | O   |              |               |               |
|  | 437 | -5.717776650 | 3.554265212   | -3.856289410  |
|  | O   |              |               |               |
|  | 438 | -9.729185326 | 2.452245711   | 1.472204925   |
|  | O   |              |               |               |
|  | 439 | -5.877102650 | 2.000639366   | 4.049559106   |
|  | O   |              |               |               |
|  | 440 | -4.162521896 | 5.447569925   | 3.591118201   |
|  | O   |              |               |               |
|  | 441 | -6.409106405 | 7.828620781   | 4.884567136   |
|  | O   |              |               |               |
|  | 442 | 10.277065593 | -1.160719979  | 5.206537249   |
|  | O   |              |               |               |
|  | 443 | 3.488014007  | 4.190768485   | 4.324379600   |
|  | O   |              |               |               |
|  | 444 | 4.326178517  | 8.026768377   | -0.190813466  |
|  | O   |              |               |               |
|  | 445 | 2.110215588  | 9.880294794   | -3.377842329  |
|  | O   |              |               |               |
|  | 446 | -0.723368741 | 7.264836840   | -1.542966210  |
|  | O   |              |               |               |

|                  |     |              |                                   |              |
|------------------|-----|--------------|-----------------------------------|--------------|
|                  | 447 | -0.351135451 | 7.263299989                       | 2.205691968  |
|                  | O   |              |                                   |              |
|                  | 448 | 2.623909988  | 5.492032585                       | 1.873909162  |
|                  | O   |              |                                   |              |
|                  | 449 | 1.674364293  | 11.473409463                      | 2.516059346  |
|                  | O   |              |                                   |              |
|                  | 450 | -1.262269310 | 13.770658821                      | 0.585437156  |
|                  | O   |              |                                   |              |
|                  | 451 | -2.164568486 | 11.340153201                      | -1.524835439 |
|                  | O   |              |                                   |              |
|                  | 452 | -3.970258505 | 14.104423745                      | 3.333408440  |
|                  | O   |              |                                   |              |
|                  | 453 | -4.716148690 | 7.299498043                       | -1.705051243 |
|                  | O   |              |                                   |              |
|                  | 454 | 2.024378526  | -4.660306344                      | -8.525862630 |
|                  | O   |              |                                   |              |
|                  | 455 | 0.476066410  | -0.724437155                      | -8.474010086 |
|                  | O   |              |                                   |              |
|                  | 456 | 3.081730925  | 3.474818302                       | -8.022201836 |
|                  | O   |              |                                   |              |
|                  | 457 | 6.841375465  | 3.922337418                       | -8.431302825 |
|                  | O   |              |                                   |              |
|                  | 458 | -4.382483001 | -2.157810716                      | -9.318518403 |
|                  | O   |              |                                   |              |
|                  | 459 | -1.585384507 | -6.472866048                      | -6.103999921 |
|                  | O   |              |                                   |              |
|                  | 460 | 0.445566934  | -5.755096586                      | -6.685227302 |
|                  | O   |              |                                   |              |
|                  | 461 | -2.910424174 | 2.674265745                       | -8.672060930 |
|                  | O   |              |                                   |              |
|                  | 462 | 9.616731180  | -6.372158001                      | -2.852284949 |
|                  | O   |              |                                   |              |
|                  | 463 | 12.011063411 | -8.104957727                      | -1.018510168 |
|                  | O   |              |                                   |              |
|                  | 464 | -0.249377902 | -6.142893366                      | -1.250437762 |
|                  | O   |              |                                   |              |
|                  | 465 | -1.085069328 | -7.083025740                      | 0.624571131  |
|                  | O   |              |                                   |              |
|                  | 466 | 4.230177783  | -11.326952364                     | -2.858403071 |
|                  | O   |              |                                   |              |
|                  | 467 | 1.990560625  | -11.113210372                     | -3.087093507 |
|                  | O   |              |                                   |              |
|                  | 468 | 4.484559123  | -6.223005969                      | -0.848757883 |
|                  | O   |              |                                   |              |
|                  | 469 | 4.170330798  | -7.925382307                      | 0.579154798  |
|                  | O   |              |                                   |              |
|                  | 470 | 2.070882683  | -6.294023848                      | -1.836698719 |
|                  | O   |              |                                   |              |
|                  | 471 | 8.141483323  | -7.434333030                      | 1.744494583  |
|                  | O   |              |                                   |              |
|                  | 472 | 6.518311013  | -5.260686086                      | 0.870123028  |
|                  | O   |              |                                   |              |
|                  | 473 | -3.735257853 | 5.107007593                       | -2.776377224 |
|                  | O   |              |                                   |              |
|                  | 474 | 6.788923742  | -11.154118808                     | -1.844888341 |
|                  | O   |              |                                   |              |
|                  | 475 | 6.535793268  | -9.358133032                      | 0.547091335  |
|                  | O   |              |                                   |              |
|                  | 476 | 4.002896645  | 4.633606716                       | -1.875180657 |
|                  | S   |              |                                   |              |
|                  | 477 | 2.373226451  | 1.618796642                       | -3.215804563 |
|                  | S   |              |                                   |              |
|                  | 478 | 2.066617372  | -3.439493849                      | -3.513709338 |
|                  | S   |              |                                   |              |
|                  | 479 | 3.250449701  | 1.387286367                       | 0.258827177  |
|                  | S   |              |                                   |              |
|                  | 480 | 0.433644899  | -1.059919637                      | -1.095371931 |
|                  | S   |              |                                   |              |
|                  | 481 | 4.602176226  | -1.032502073                      | -5.078784994 |
|                  | S   |              |                                   |              |
|                  | 482 | 2.927223499  | -3.674154767                      | 0.057786838  |
|                  | S   |              |                                   |              |
|                  | 483 | 5.870499456  | 1.340117422                       | -2.226987278 |
|                  | S   |              |                                   |              |
|                  | 484 | 5.612645219  | -3.645915731                      | -2.511948677 |
|                  | S   |              |                                   |              |
|                  | 485 | 6.010335893  | -1.416143576                      | 0.419354451  |
|                  | S   |              |                                   |              |
|                  | end |              |                                   |              |
| <b>core-S2BH</b> |     |              | <b>cores2bh2n2xdth_1_53009.16</b> |              |
| <b>2N2 TS</b>    | 1   | -8.338055728 | -4.656766506                      | 0.726024245  |

**35, S=3/2**

**Fe( 139) -2.313**  
**Fe( 140) -2.343**  
**Fe( 141) -2.530**  
**Fe( 142) 2.769**  
**Fe( 143) 2.943**  
**Fe( 144) 2.214**  
**Fe( 145) 2.027**

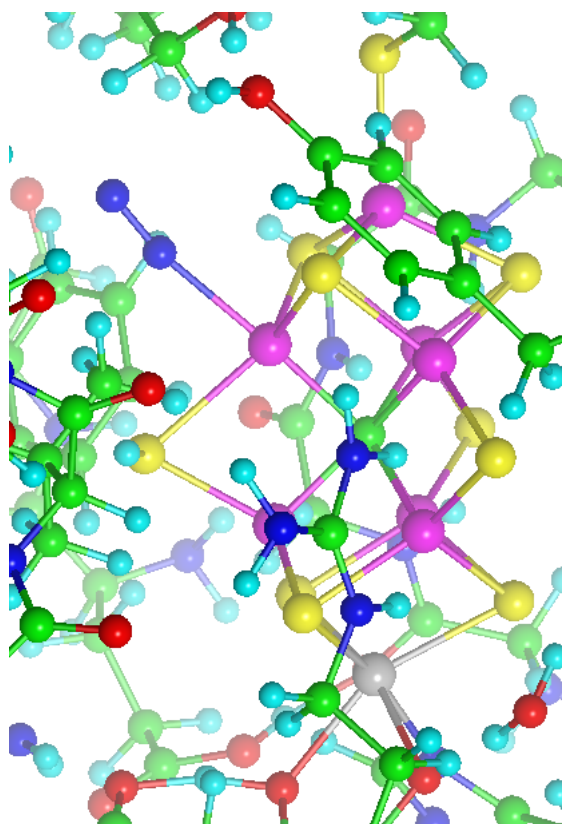

|    |              |               |              |
|----|--------------|---------------|--------------|
| C  |              |               |              |
| 2  | -8.770136403 | -5.760087686  | -0.246266759 |
| C  |              |               |              |
| 3  | -9.036531769 | -2.629732844  | 1.925571828  |
| C  |              |               |              |
| 4  | -8.474894564 | -2.918311585  | 3.314932608  |
| C  |              |               |              |
| 5  | -8.288512393 | -4.493160126  | 5.173472061  |
| C  |              |               |              |
| 6  | -6.775391221 | -4.729565173  | 5.170800355  |
| C  |              |               |              |
| 7  | -4.782609249 | -5.279337805  | 3.870751328  |
| C  |              |               |              |
| 8  | -4.070434163 | -3.925158801  | 3.857331139  |
| C  |              |               |              |
| 9  | -4.136021315 | -1.589667264  | 3.143336237  |
| C  |              |               |              |
| 10 | -4.094447090 | -0.959606282  | 4.544143869  |
| C  |              |               |              |
| 11 | -5.261994593 | -0.537241673  | 6.630807991  |
| C  |              |               |              |
| 12 | -4.388933063 | -1.223765647  | 7.689366169  |
| C  |              |               |              |
| 13 | -3.793666509 | -3.325900714  | 8.795694657  |
| C  |              |               |              |
| 14 | -2.359663336 | -3.789798749  | 8.502582796  |
| C  |              |               |              |
| 15 | -0.802135052 | -4.606314727  | 6.775917588  |
| C  |              |               |              |
| 16 | 0.163505211  | -3.621782108  | 6.106723597  |
| C  |              |               |              |
| 17 | 0.426934275  | -1.652118120  | 4.638294810  |
| C  |              |               |              |
| 18 | 0.767637916  | -0.477926774  | 5.584624933  |
| C  |              |               |              |
| 19 | -0.225772118 | -1.195959165  | 3.320018277  |
| C  |              |               |              |
| 20 | 0.593512569  | -0.072459339  | 2.673632228  |
| C  |              |               |              |
| 21 | -0.400324152 | -2.396716403  | 2.381980438  |
| C  |              |               |              |
| 22 | -0.108891911 | 1.341556946   | 7.007645262  |
| C  |              |               |              |
| 23 | 0.078820987  | 0.934795401   | 8.485155242  |
| C  |              |               |              |
| 24 | -1.252551906 | 2.368666155   | 6.816275970  |
| C  |              |               |              |
| 25 | -1.133801121 | 3.522081424   | 7.819535562  |
| C  |              |               |              |
| 26 | -1.261445603 | 2.905824145   | 5.379479063  |
| C  |              |               |              |
| 27 | -0.804197380 | -0.159061305  | 10.466715458 |
| C  |              |               |              |
| 28 | 0.532869325  | -0.751818442  | 10.862223443 |
| C  |              |               |              |
| 29 | 4.473591178  | -12.078759198 | 4.325148276  |
| C  |              |               |              |
| 30 | 5.201425882  | -10.862840896 | 3.754645822  |
| C  |              |               |              |
| 31 | 5.640582399  | -8.441390923  | 4.175644225  |
| C  |              |               |              |
| 32 | 6.809125891  | -8.184119510  | 5.146157688  |
| C  |              |               |              |
| 33 | 4.570838645  | -7.341191220  | 4.276359140  |
| C  |              |               |              |
| 34 | 5.111156644  | -5.944660481  | 3.963672226  |
| C  |              |               |              |
| 35 | 3.977920907  | -4.932132178  | 3.800679598  |
| C  |              |               |              |
| 36 | 4.238478621  | -2.435546416  | 3.959420865  |
| C  |              |               |              |
| 37 | 9.169611765  | -7.553135174  | 5.326397693  |
| C  |              |               |              |
| 38 | 9.558823802  | -6.090996748  | 5.341789270  |
| C  |              |               |              |
| 39 | -5.470307384 | -2.211624415  | -1.971293213 |
| C  |              |               |              |
| 40 | -5.750630257 | -0.754035450  | -1.563051119 |
| C  |              |               |              |
| 41 | -3.968414647 | -2.507350513  | -1.773705349 |
| C  |              |               |              |
| 42 | -3.583859749 | -4.001362155  | -1.838456390 |

|   |    |              |              |              |
|---|----|--------------|--------------|--------------|
| C | 43 | -3.228035215 | -4.536201774 | -3.224900323 |
| C | 44 | -5.845224692 | 1.533077221  | -2.506656001 |
| C | 45 | -6.973652281 | 2.121564565  | -1.652580584 |
| C | 46 | -5.830550434 | 2.126998645  | -3.922370232 |
| C | 47 | -9.251969200 | 1.832971765  | -0.804917795 |
| C | 48 | -8.972445343 | 1.812317560  | 0.702918778  |
| C | 49 | -7.485807241 | 1.094513317  | 2.513057354  |
| C | 50 | -6.263616654 | 1.946580330  | 2.858973178  |
| C | 51 | -4.517460197 | 3.498255321  | 2.132857374  |
| C | 52 | -4.929295214 | 4.823682800  | 2.799151827  |
| C | 53 | -3.747839400 | 3.877316656  | 0.856238584  |
| C | 54 | -3.159357074 | 2.728572769  | 0.104984000  |
| C | 55 | -2.825174306 | 1.428885748  | 0.434253044  |
| C | 56 | -2.389039825 | 1.624198810  | -1.660030856 |
| C | 57 | -6.592031352 | 6.636010035  | 2.758394798  |
| C | 58 | -6.643324516 | 6.765213762  | 4.279038390  |
| C | 59 | -7.997831595 | 6.829981843  | 2.144775693  |
| C | 60 | -8.484372642 | 8.242539455  | 2.011294633  |
| C | 61 | -8.387678638 | 9.319870022  | 2.870636421  |
| C | 62 | -9.496277283 | 9.891378399  | 1.038360679  |
| C | 63 | 8.939281755  | 0.672986152  | 4.357578370  |
| C | 64 | 9.869819807  | -0.521127026 | 4.262274440  |
| C | 65 | 7.516585818  | 0.166708311  | 4.007619245  |
| C | 66 | 6.465599961  | 1.246906821  | 4.111993209  |
| C | 67 | 5.800491453  | 1.496794223  | 5.326144526  |
| C | 68 | 6.113895379  | 2.026017761  | 2.996234197  |
| C | 69 | 4.807811609  | 2.476901979  | 5.425643163  |
| C | 70 | 5.135199030  | 3.016927326  | 3.083580821  |
| C | 71 | 4.475603717  | 3.233712783  | 4.296768872  |
| C | 72 | 5.972685943  | 6.322423805  | -0.776303670 |
| C | 73 | 5.059241045  | 7.527918778  | -1.061713580 |
| C | 74 | 5.128940816  | 5.093715296  | -0.455204563 |
| C | 75 | 4.321701009  | 9.176100635  | -2.748692914 |
| C | 76 | 2.850321480  | 8.917137133  | -3.082075056 |
| C | 77 | 1.064558566  | 7.176291035  | -3.173736658 |
| C | 78 | 0.420258730  | 6.871147569  | -1.795467374 |
| C | 79 | 1.095466895  | 5.940370294  | -4.104413126 |
| C | 80 | -0.198860789 | 5.166734236  | -4.383014701 |
| C | 81 | -1.200362900 | 5.816903911  | -5.350676755 |
| C | 82 | -2.571185356 | 7.872669224  | -4.978875236 |
| C | 83 | 0.630956441  | 5.898625265  | 0.441306066  |

|   |     |              |              |              |
|---|-----|--------------|--------------|--------------|
| C | 84  | 0.507409583  | 7.147792500  | 1.325670269  |
| C | 85  | 1.464524382  | 4.861276936  | 1.224705532  |
| C | 86  | 1.762518818  | 9.064770339  | 2.181671143  |
| C | 87  | 1.320341486  | 10.476171960 | 1.834653306  |
| C | 88  | 0.202453790  | 11.896967875 | 0.200355410  |
| C | 89  | -1.058486106 | 12.579382106 | 0.787125317  |
| C | 90  | 0.176191722  | 11.931848947 | -1.330954879 |
| C | 91  | -1.008125727 | 11.201990051 | -1.955025291 |
| C | 92  | -3.178188697 | 12.286234248 | 1.980335369  |
| C | 93  | -3.062389844 | 13.369622976 | 3.043520147  |
| C | 94  | -4.020337904 | 11.095830656 | 2.521237579  |
| C | 95  | -4.260172903 | 10.038399141 | 1.467624339  |
| C | 96  | -5.370177910 | 10.122186454 | 0.612748573  |
| C | 97  | -3.356672727 | 8.978968707  | 1.275427470  |
| C | 98  | -5.559104815 | 9.199199931  | -0.419084870 |
| C | 99  | -3.512841903 | 8.064900486  | 0.229885433  |
| C | 100 | -4.611998168 | 8.193754831  | -0.616199550 |
| C | 101 | 4.409897031  | -4.319787351 | -8.559718284 |
| C | 102 | 2.987430130  | -3.926389354 | -8.199063117 |
| C | 103 | 1.595810882  | -2.273380061 | -6.971280380 |
| C | 104 | 1.282757634  | -0.887794641 | -7.544235312 |
| C | 105 | 1.862345031  | 1.496963592  | -7.445419930 |
| C | 106 | 3.128641373  | 2.344527875  | -7.504443394 |
| C | 107 | 5.438352711  | 2.723125576  | -6.858364236 |
| C | 108 | 6.061257394  | 2.997092615  | -8.213873958 |
| C | 109 | -2.228269143 | -3.239719372 | -9.369189868 |
| C | 110 | -3.170193389 | -2.050070839 | -9.147262940 |
| C | 111 | -1.978096885 | -3.962684794 | -8.024463590 |
| C | 112 | -1.381464056 | -5.365833448 | -8.244137235 |
| C | 113 | -0.867952002 | -5.935248663 | -6.940030762 |
| C | 114 | -3.416443716 | 0.295300405  | -8.504951585 |
| C | 115 | -2.762877319 | 1.536515417  | -9.076918453 |
| C | 116 | -3.905200691 | 0.430910162  | -7.042967823 |
| C | 117 | -2.791301115 | 0.250476166  | -6.044604331 |
| C | 118 | -1.910026533 | 1.302806967  | -5.739938353 |
| C | 119 | -2.558359413 | -1.011700479 | -5.475127510 |
| C | 120 | -0.797344898 | 1.078065828  | -4.923863917 |
| C | 121 | -1.443778360 | -1.236550155 | -4.660668355 |
| C | 122 | -0.551023946 | -0.194500275 | -4.400396756 |
| C | 123 | 7.596061967  | -6.981211952 | -4.063066188 |
| C | 124 | 8.685285124  | -7.176157707 | -2.999006394 |

|  |     |               |               |              |
|--|-----|---------------|---------------|--------------|
|  | C   |               |               |              |
|  | 125 | 6.202908341   | -7.155642420  | -3.440803838 |
|  | C   |               |               |              |
|  | 126 | 5.038521821   | -6.840798681  | -4.324252745 |
|  | C   |               |               |              |
|  | 127 | 4.728070247   | -7.416892331  | -5.539441274 |
|  | C   |               |               |              |
|  | 128 | 3.048291332   | -6.131504375  | -4.888578889 |
|  | C   |               |               |              |
|  | 129 | 9.632127312   | -8.506217845  | -1.210749290 |
|  | C   |               |               |              |
|  | 130 | 11.044368152  | -8.385563801  | -1.737380642 |
|  | C   |               |               |              |
|  | 131 | -0.146405645  | -6.789694359  | -0.124226038 |
|  | C   |               |               |              |
|  | 132 | 1.300313238   | -7.050849581  | 0.325080964  |
|  | C   |               |               |              |
|  | 133 | 2.303475786   | -7.303400379  | -0.832961122 |
|  | C   |               |               |              |
|  | 134 | 2.134820696   | -8.732829971  | -1.406540175 |
|  | C   |               |               |              |
|  | 135 | 3.232017420   | -9.181226035  | -2.376335666 |
|  | C   |               |               |              |
|  | 136 | 3.140093626   | -10.661892891 | -2.808388038 |
|  | C   |               |               |              |
|  | 137 | 3.740683444   | -7.150708749  | -0.312859065 |
|  | C   |               |               |              |
|  | 138 | 3.614423470   | -1.050634900  | -1.812017632 |
|  | C   |               |               |              |
|  | 139 | 3.988494606   | -2.334820930  | -3.374490009 |
|  | Fe  |               |               |              |
|  | 140 | 2.262738882   | 0.351128333   | -1.402493495 |
|  | Fe  |               |               |              |
|  | 141 | 4.913402717   | 0.031336898   | -0.769554990 |
|  | Fe  |               |               |              |
|  | 142 | 4.197379744   | 0.197680411   | -3.268399987 |
|  | Fe  |               |               |              |
|  | 143 | 4.037659946   | 2.350483717   | -1.661917159 |
|  | Fe  |               |               |              |
|  | 144 | 4.607850042   | -2.524944535  | -0.871159184 |
|  | Fe  |               |               |              |
|  | 145 | 2.182696707   | -2.352935660  | -1.582786021 |
|  | Fe  |               |               |              |
|  | 146 | -7.082264996  | -6.903324188  | -0.161495499 |
|  | H   |               |               |              |
|  | 147 | -7.119401958  | -5.894922878  | -1.443148742 |
|  | H   |               |               |              |
|  | 148 | -10.238999934 | -3.873095120  | 0.676017327  |
|  | H   |               |               |              |
|  | 149 | -9.411492216  | -5.310298783  | -1.021470863 |
|  | H   |               |               |              |
|  | 150 | -9.416220537  | -6.451686221  | 0.320745710  |
|  | H   |               |               |              |
|  | 151 | -8.299024105  | -1.990415266  | 1.417733676  |
|  | H   |               |               |              |
|  | 152 | -9.436747693  | -4.726074539  | 3.369366259  |
|  | H   |               |               |              |
|  | 153 | -9.964247549  | -2.053760918  | 2.041678539  |
|  | H   |               |               |              |
|  | 154 | -8.787006260  | -5.419797540  | 5.488137123  |
|  | H   |               |               |              |
|  | 155 | -6.793272555  | -5.182311126  | 3.156409696  |
|  | H   |               |               |              |
|  | 156 | -8.485145627  | -3.723462840  | 5.931459179  |
|  | H   |               |               |              |
|  | 157 | -3.112150508  | -1.581632607  | 2.753069522  |
|  | H   |               |               |              |
|  | 158 | -5.521010524  | -3.146476462  | 2.625749843  |
|  | H   |               |               |              |
|  | 159 | -4.564171280  | -5.813289966  | 2.936339694  |
|  | H   |               |               |              |
|  | 160 | -4.937745984  | 0.509762470   | 6.577654214  |
|  | H   |               |               |              |
|  | 161 | -6.026806422  | -1.581280430  | 4.911915240  |
|  | H   |               |               |              |
|  | 162 | -4.369937160  | -5.858149990  | 4.705680925  |
|  | H   |               |               |              |
|  | 163 | -4.758062768  | -0.979703356  | 2.474213174  |
|  | H   |               |               |              |
|  | 164 | -5.106326376  | -3.081647769  | 7.123316527  |
|  | H   |               |               |              |
|  | 165 | -6.308617460  | -0.560739224  | 6.964262969  |

|   |     |              |              |              |
|---|-----|--------------|--------------|--------------|
| H | 166 | -0.945129404 | -3.219658250 | 2.865491290  |
| H | 167 | -0.972478377 | -2.110227897 | 1.487983888  |
| H | 168 | 0.575047759  | -2.786542512 | 2.048542687  |
| H | 169 | -1.219323219 | -0.787130560 | 3.569231642  |
| H | 170 | -4.390614046 | -4.221927961 | 9.020840249  |
| H | 171 | -1.391061380 | 2.103051102  | 4.640625404  |
| H | 172 | -1.739157899 | -0.095283538 | 8.555591626  |
| H | 173 | -1.181507217 | 3.180221681  | 8.863467205  |
| H | 174 | 0.107314883  | 0.271056892  | 1.749373102  |
| H | 175 | 1.612255437  | -0.404767845 | 2.421048803  |
| H | 176 | 8.933840553  | 1.007020794  | 5.413075746  |
| H | 177 | -2.085614025 | 3.622213429  | 5.245283811  |
| H | 178 | -1.954345395 | 4.237303499  | 7.660515669  |
| H | 179 | -0.316719516 | 3.429481008  | 5.159405562  |
| H | 180 | -0.182394585 | 4.060553940  | 7.682217219  |
| H | 181 | -2.209639290 | 1.847361540  | 6.998635360  |
| H | 182 | 0.845788821  | 1.811391433  | 6.730815612  |
| H | 183 | -1.235353788 | -0.077920896 | 5.847663945  |
| H | 184 | 0.682597458  | 0.803926898  | 3.333362010  |
| H | 185 | 1.797832933  | 4.069663024  | 0.537267293  |
| H | 186 | 0.795319976  | 4.413652173  | 1.976565010  |
| H | 187 | 2.799218780  | 4.969950664  | 2.667458577  |
| H | 188 | 3.089599779  | 4.249686824  | 5.202088074  |
| H | 189 | 4.855150110  | 3.598954486  | 2.205575973  |
| H | 190 | 6.586101485  | 1.834915673  | 2.029700498  |
| H | 191 | 6.046246651  | 0.900959915  | 6.208979642  |
| H | 192 | -1.393450702 | -2.681659574 | 5.146236980  |
| H | 193 | -0.973592683 | -5.435938911 | 6.072127614  |
| H | 194 | -0.284728564 | -5.002584771 | 7.656866559  |
| H | 195 | -2.798970158 | -3.940976398 | 6.485448090  |
| H | 196 | -3.746232138 | -2.710618946 | 9.702558563  |
| H | 197 | 4.282750008  | 2.635582801  | 6.371032663  |
| H | 198 | 1.388365115  | -2.125763814 | 4.406350332  |
| H | 199 | -1.006485644 | 0.720752054  | 11.098330698 |
| H | 200 | -1.570962863 | -0.919755901 | 10.678779968 |
| H | 201 | 1.053864413  | -1.321162111 | 10.058292377 |
| H | 202 | 10.019276348 | -8.155314639 | 4.970233775  |
| H | 203 | -1.977370401 | -5.831921077 | -4.181494040 |
| H | 204 | 0.950408603  | -6.107849240 | -1.717883781 |
| H | 205 | -2.162677831 | -6.036395206 | -8.628647130 |
| H | 206 | -0.566873061 | -5.321793965 | -8.981749980 |

|   |     |               |              |               |
|---|-----|---------------|--------------|---------------|
| H | 207 | -2.920380642  | -4.060761622 | -7.463631656  |
| H | 208 | -2.121132432  | 1.347015826  | -9.969113660  |
| H | 209 | -2.816216795  | -3.920441530 | -10.003231266 |
| H | 210 | -3.390302616  | -1.930990691 | -2.512418282  |
| H | 211 | -4.419888003  | -4.619991208 | -1.466148639  |
| H | 212 | -1.585958407  | -0.823919702 | -8.596874406  |
| H | 213 | -4.318921404  | 0.156473809  | -9.135339023  |
| H | 214 | -0.369491892  | -2.332646992 | -9.556095756  |
| H | 215 | -1.657826467  | -5.691318890 | -2.450093063  |
| H | 216 | -1.308909450  | -3.344432703 | -7.405614643  |
| H | 217 | -0.553596020  | -3.691210536 | -10.463558370 |
| H | 218 | -6.835810647  | -2.824554158 | -3.394016831  |
| H | 219 | -3.673303251  | -2.112747532 | -0.791774548  |
| H | 220 | 0.927058993   | -5.312603881 | -7.448196044  |
| H | 221 | -2.744291934  | -4.191543604 | -1.154234535  |
| H | 222 | -3.861575339  | 2.983209058  | 2.848355697   |
| H | 223 | -2.898164470  | 0.946739066  | 1.405894980   |
| H | 224 | -8.321947702  | 1.481037100  | 3.112886608   |
| H | 225 | -7.295442596  | 0.602859702  | 0.446261691   |
| H | 226 | -6.732522350  | 4.708113844  | 1.828983569   |
| H | 227 | -7.912699904  | 9.446130581  | 3.837229523   |
| H | 228 | -6.939477196  | 5.820885478  | 4.797155093   |
| H | 229 | -8.722849786  | 6.215772707  | 2.708826496   |
| H | 230 | -5.895293072  | 7.392139178  | 2.363082803   |
| H | 231 | -10.043935922 | 10.514557979 | 0.335744291   |
| H | 232 | -2.965236953  | 4.591840092  | 1.161316473   |
| H | 233 | -4.434100130  | 4.425208016  | 0.189601542   |
| H | 234 | -9.137040999  | 11.304288087 | 2.591280547   |
| H | 235 | -7.972787674  | 6.411558656  | 1.126372784   |
| H | 236 | -6.007263626  | 2.566780182  | 0.889146772   |
| H | 237 | -7.291212016  | 0.070930428  | 2.865787632   |
| H | 238 | -9.571932062  | 2.857205204  | -1.040873771  |
| H | 239 | -2.050746843  | 1.448119833  | -2.678743847  |
| H | 240 | -10.097519721 | 1.162114608  | -1.006612732  |
| H | 241 | 10.194804981  | 2.186655697  | 3.776506067   |
| H | 242 | 8.647234118   | 2.395167765  | 3.289763814   |
| H | 243 | 2.067931830   | 5.741750270  | -1.163173023  |
| H | 244 | -0.385596296  | 5.499842674  | 0.321480632   |
| H | 245 | 2.301642654   | 7.803098947  | 0.582046633   |
| H | 246 | -3.020782421  | 3.684879426  | -1.809066301  |
| H | 247 | -4.489904358  | 4.571542128  | -3.142920541  |



|   |     |              |              |              |
|---|-----|--------------|--------------|--------------|
| H | 248 | -5.906940810 | 3.905239273  | -4.740950894 |
| H | 249 | -4.143905196 | 5.777005753  | -2.168002590 |
| H | 250 | -4.966834554 | 1.708669092  | -4.464356555 |
| H | 251 | -6.754403678 | 1.845696285  | -4.452457437 |
| H | 252 | 1.134858034  | 11.565664518 | -1.724876365 |
| H | 253 | 0.082847391  | 12.989288797 | -1.624784495 |
| H | 254 | 0.261877959  | 10.205339847 | -3.261615500 |
| H | 255 | -1.464429213 | 9.866386876  | -3.397747466 |
| H | 256 | -2.365079273 | 9.453429610  | -6.269700887 |
| H | 257 | -1.727263109 | 5.035478226  | -5.919919971 |
| H | 258 | -6.436152183 | 9.268205899  | -1.068559927 |
| H | 259 | -2.511060028 | 8.835851641  | 1.953915434  |
| H | 260 | -3.667573168 | 8.142330440  | -3.255892365 |
| H | 261 | 1.812456273  | 5.225505374  | -3.670415140 |
| H | 262 | 3.148052934  | 6.919521822  | -2.802688891 |
| H | 263 | -0.708246076 | 4.888122004  | -3.446997362 |
| H | 264 | -8.180964645 | 0.553715922  | -2.156871497 |
| H | 265 | 4.792318863  | 9.628217918  | -3.631559199 |
| H | 266 | -5.822806929 | -0.417089034 | -3.523313913 |
| H | 267 | 1.534060228  | 6.268089723  | -5.061450703 |
| H | 268 | -2.767104979 | 7.287369524  | 0.061134080  |
| H | 269 | 4.324334813  | 9.925075005  | -1.943721584 |
| H | 270 | -1.772188450 | 7.945075247  | -6.874822648 |
| H | 271 | -3.911261278 | 9.339776999  | -4.485842063 |
| H | 272 | -5.242405143 | -3.112405266 | -3.810282173 |
| H | 273 | -6.028600518 | -2.830138093 | -1.243225294 |
| H | 274 | -6.105536580 | 10.917968042 | 0.754973714  |
| H | 275 | -4.918428776 | 1.825240433  | -1.992255876 |
| H | 276 | 0.478140646  | 7.991758448  | -3.608736505 |
| H | 277 | -0.659851799 | 6.436098374  | -6.078778164 |
| H | 278 | 0.111894000  | 4.218423741  | -4.846599290 |
| H | 279 | -2.745862712 | 6.144425080  | -3.917984039 |
| H | 280 | 1.253094603  | 8.773568384  | 3.112768478  |
| H | 281 | 0.368680876  | 9.748145755  | 0.181072099  |
| H | 282 | 1.021492772  | 12.557943297 | 0.525263762  |
| H | 283 | 2.842284056  | 9.102281612  | 2.382053089  |
| H | 284 | -1.677811140 | 10.816605142 | 1.578595383  |
| H | 285 | 5.042185051  | -3.422846148 | -8.632865889 |
| H | 286 | 4.783551894  | -4.904729048 | -7.693718240 |
| H | 287 | 7.710098401  | -5.942213412 | -4.406148666 |
| H | 288 | 5.338934722  | -5.511448830 | -9.926470091 |

|   |     |              |               |              |
|---|-----|--------------|---------------|--------------|
| H | 289 | 3.734919922  | -5.799928746  | -9.777741947 |
| H | 290 | 5.813483013  | 4.262930575   | -0.239423217 |
| H | 291 | 6.323403819  | 6.895423304   | 1.154741991  |
| H | 292 | 5.705623234  | 7.571912771   | -3.014627095 |
| H | 293 | 4.496927391  | 5.288547892   | 0.422349347  |
| H | 294 | 7.496000813  | 7.374580616   | 0.118966254  |
| H | 295 | 6.193132604  | 2.206987499   | -6.244782934 |
| H | 296 | 6.589785530  | 6.111643438   | -1.663571623 |
| H | 297 | 4.128282145  | -7.363115904  | 5.286183922  |
| H | 298 | 6.014098680  | -8.486981534  | 3.145787802  |
| H | 299 | 4.289430306  | 0.977554471   | -6.435756208 |
| H | 300 | 4.528089309  | -0.422510953  | 3.774246110  |
| H | 301 | 1.422503959  | 1.482913091   | -8.450551446 |
| H | 302 | -1.271334554 | -2.226229316  | -4.231398468 |
| H | 303 | 1.152539628  | 2.042405648   | -6.800697144 |
| H | 304 | 3.411948364  | -4.828341573  | 4.733975654  |
| H | 305 | 2.572503790  | -0.102127185  | -6.172686911 |
| H | 306 | 3.265425033  | -5.285583706  | 3.037245430  |
| H | 307 | 3.775601307  | -7.602062289  | 3.559782397  |
| H | 308 | 5.688785966  | -5.965970314  | 3.027922472  |
| H | 309 | 5.790461340  | -5.600219634  | 4.759632901  |
| H | 310 | -4.683132906 | -0.328788323  | -6.881491606 |
| H | 311 | 4.529189717  | -9.866362113  | 5.352174724  |
| H | 312 | 3.609175068  | -12.249479086 | 3.666145058  |
| H | 313 | 0.328532473  | -0.356195310  | -3.778674990 |
| H | 314 | 4.709358995  | -12.207149941 | 6.366970513  |
| H | 315 | 3.168302481  | -12.453031946 | 5.870263499  |
| H | 316 | 4.891052376  | -3.590060738  | 2.440767359  |
| H | 317 | -0.107985714 | 1.890846690   | -4.683061154 |
| H | 318 | -3.251296725 | -1.833951481  | -5.670994797 |
| H | 319 | 6.690682340  | -10.637168516 | -1.014546456 |
| H | 320 | 6.088916189  | -8.200995504  | -3.104688012 |
| H | 321 | 5.712952903  | -8.795406145  | 0.456545915  |
| H | 322 | 5.862358142  | -11.143845256 | -2.225690349 |
| H | 323 | 5.775091210  | 2.281103225   | -9.022057932 |
| H | 324 | 5.824222694  | -5.644872741  | 0.257944671  |
| H | 325 | 1.320041306  | -7.887649712  | 1.032837762  |
| H | 326 | 3.702377687  | -2.310277317  | -7.161707071 |
| H | 327 | 2.119056315  | -9.414426899  | -0.542040900 |
| H | 328 | 2.927728782  | -7.230670568  | -6.684580288 |
| H | 329 | 2.075343128  | -5.658123821  | -4.896715822 |

|    |     |              |               |              |
|----|-----|--------------|---------------|--------------|
| H  | 330 | 5.150647516  | -12.938496288 | 4.187828312  |
| H  | 331 | 4.916845033  | -1.338096806  | 2.332814907  |
| H  | 332 | 7.665904687  | -6.614923877  | 1.437817815  |
| H  | 333 | 6.826193817  | -4.467338292  | 0.398204610  |
| H  | 334 | 8.015453552  | -7.705037691  | 3.515401695  |
| H  | 335 | 3.287506581  | -3.133977407  | 5.632147203  |
| H  | 336 | 3.185044693  | -8.570169277  | -3.290337647 |
| H  | 337 | 4.223351762  | -9.016796169  | -1.931279120 |
| H  | 338 | 1.148853958  | -8.801034246  | -1.890900750 |
| H  | 339 | 1.642436335  | -2.242277576  | -5.872103038 |
| H  | 340 | -2.089611927 | 2.292700345   | -6.167831668 |
| H  | 341 | -4.373430488 | 1.423488365   | -6.949611404 |
| H  | 342 | 1.610190866  | -6.145030915  | 0.872792197  |
| H  | 343 | 7.641252076  | -8.160293733  | 1.275944470  |
| H  | 344 | 6.307930200  | -9.947147631  | 1.306475693  |
| H  | 345 | 3.267354050  | -1.451058022  | 5.448629986  |
| H  | 346 | 5.279662908  | -8.117893391  | -6.154034359 |
| H  | 347 | 6.138769406  | -6.538967227  | -2.536240127 |
| H  | 348 | 0.800009627  | -2.955914377  | -7.277020861 |
| H  | 349 | 5.212538183  | 3.683941659   | -6.370295622 |
| H  | 350 | 7.277566404  | -0.655756843  | 4.698906970  |
| H  | 351 | 7.529903408  | -0.248274227  | 2.987172038  |
| H  | 352 | 8.725869926  | -7.681167249  | -5.625528302 |
| H  | 353 | 7.792908706  | -8.838306328  | -4.941015325 |
| H  | 354 | 9.515286093  | -9.530808019  | -0.824581307 |
| H  | 355 | 7.899429204  | -9.012674201  | -2.345897256 |
| H  | 356 | 11.168601113 | -8.641676710  | -2.817059808 |
| H  | 357 | 9.489367219  | -7.814985200  | -0.364873661 |
| H  | 358 | 10.160794980 | -0.789848444  | 3.217333613  |
| H  | 359 | -2.078280073 | 13.415336283  | 3.566887511  |
| H  | 360 | 8.961783628  | -7.842208184  | 6.371589473  |
| H  | 361 | 8.716137517  | -5.375863594  | 5.180940230  |
| H  | 362 | -3.699490650 | 12.727230286  | 1.114019952  |
| H  | 363 | -3.507791647 | 10.660623301  | 3.393221167  |
| H  | 364 | -4.975518242 | 11.511596904  | 2.872519917  |
| H  | 365 | -5.637336104 | 7.365448276   | -2.047560740 |
| H  | 366 | 0.364336312  | -1.167996125  | 0.223893287  |
| H  | 367 | 3.506465541  | -4.652563769  | -2.054576676 |
| Mo | 368 | -7.702597402 | -6.515589804  | -0.876832420 |
| N  | 369 | -9.332744979 | -3.815225810  | 1.134706406  |
| N  | 370 | -8.830566948 | -4.093623690  | 3.886079684  |

|     |              |               |              |
|-----|--------------|---------------|--------------|
| N   |              |               |              |
| 371 | -6.226652679 | -5.158547869  | 4.006904557  |
| N   |              |               |              |
| 372 | -4.667156820 | -2.944943531  | 3.142105898  |
| N   |              |               |              |
| 373 | -5.191501930 | -1.151092004  | 5.314865109  |
| N   |              |               |              |
| 374 | -4.466403294 | -2.578666550  | 7.744925314  |
| N   |              |               |              |
| 375 | -2.080463160 | -4.065231078  | 7.200396156  |
| N   |              |               |              |
| 376 | -0.388852368 | -2.655012854  | 5.330142803  |
| N   |              |               |              |
| 377 | -0.285968277 | 0.184183033   | 6.126073929  |
| N   |              |               |              |
| 378 | -0.874993885 | 0.148446485   | 9.046393020  |
| N   |              |               |              |
| 379 | 4.001759776  | -11.888358427 | 5.702060541  |
| N   |              |               |              |
| 380 | 5.050014419  | -9.737162598  | 4.478305983  |
| N   |              |               |              |
| 381 | 4.474279178  | -3.619934852  | 3.373520871  |
| N   |              |               |              |
| 382 | 0.761157039  | 1.801703473   | -0.840735718 |
| N   |              |               |              |
| 383 | 0.146149253  | 2.678062085   | -0.532495331 |
| N   |              |               |              |
| 384 | 3.764226730  | -2.330362827  | 5.220046788  |
| N   |              |               |              |
| 385 | 4.483798964  | -1.306258037  | 3.273585773  |
| N   |              |               |              |
| 386 | 7.972656749  | -7.817110632  | 4.552607057  |
| N   |              |               |              |
| 387 | -5.890144237 | -2.438207801  | -3.361303866 |
| N   |              |               |              |
| 388 | -2.225743244 | -5.432276698  | -3.271468347 |
| N   |              |               |              |
| 389 | -5.902719492 | 0.084137260   | -2.623776792 |
| N   |              |               |              |
| 390 | -8.144137647 | 1.438587084   | -1.655631665 |
| N   |              |               |              |
| 391 | -7.901793470 | 1.085362454   | 1.123657025  |
| N   |              |               |              |
| 392 | -5.664700302 | 2.642062031   | 1.849877187  |
| N   |              |               |              |
| 393 | -2.867879414 | 2.836849537   | -1.240760079 |
| N   |              |               |              |
| 394 | -2.357005564 | 0.747942891   | -0.665892035 |
| N   |              |               |              |
| 395 | -6.142758656 | 5.296397475   | 2.412356630  |
| N   |              |               |              |
| 396 | -9.181101135 | 8.612813314   | 0.871198064  |
| N   |              |               |              |
| 397 | -9.034068110 | 10.358723192  | 2.232886005  |
| N   |              |               |              |
| 398 | 9.382123521  | 1.691246486   | 3.401987325  |
| N   |              |               |              |
| 399 | 6.881733714  | 6.588688929   | 0.351566014  |
| N   |              |               |              |
| 400 | 5.097408813  | 8.021828176   | -2.334855365 |
| N   |              |               |              |
| 401 | 2.445209677  | 7.633181245   | -3.027739499 |
| N   |              |               |              |
| 402 | -2.207302113 | 6.632492761   | -4.663254375 |
| N   |              |               |              |
| 403 | -2.114827059 | 8.486676618   | -6.088602860 |
| N   |              |               |              |
| 404 | -3.338853305 | 8.583245097   | -4.119690039 |
| N   |              |               |              |
| 405 | 1.178528051  | 6.195206187   | -0.885372201 |
| N   |              |               |              |
| 406 | 1.500118127  | 8.069810571   | 1.159671928  |
| N   |              |               |              |
| 407 | 0.501614316  | 10.587409613  | 0.744981988  |
| N   |              |               |              |
| 408 | -0.712719134 | 10.465552307  | -3.059862189 |
| N   |              |               |              |
| 409 | -1.858899845 | 11.817667531  | 1.575255702  |
| N   |              |               |              |
| 410 | 4.431182298  | -5.050377676  | -9.830286521 |
| N   |              |               |              |
| 411 | 2.856722214  | -2.784316720  | -7.492746741 |

|     |              |               |               |  |
|-----|--------------|---------------|---------------|--|
| N   |              |               |               |  |
| 412 | 2.000627370  | 0.121172877   | -7.000944399  |  |
| N   |              |               |               |  |
| 413 | 4.265272168  | 1.870928930   | -6.937305644  |  |
| N   |              |               |               |  |
| 414 | -1.038325449 | -2.852549844  | -10.136921952 |  |
| N   |              |               |               |  |
| 415 | -2.594678371 | -0.872982051  | -8.769399573  |  |
| N   |              |               |               |  |
| 416 | 7.795917378  | -7.856397877  | -5.233791985  |  |
| N   |              |               |               |  |
| 417 | 3.975657936  | -6.024793193  | -3.936701179  |  |
| N   |              |               |               |  |
| 418 | 3.474572834  | -6.955803365  | -5.872857637  |  |
| N   |              |               |               |  |
| 419 | 8.642677205  | -8.315446694  | -2.255273962  |  |
| N   |              |               |               |  |
| 420 | -7.175957972 | -4.545753367  | 1.155440320   |  |
| O   |              |               |               |  |
| 421 | -7.731544424 | -2.097101142  | 3.880468480   |  |
| O   |              |               |               |  |
| 422 | -6.110971094 | -4.554517302  | 6.206635771   |  |
| O   |              |               |               |  |
| 423 | -3.006699421 | -3.742898039  | 4.478683685   |  |
| O   |              |               |               |  |
| 424 | -3.107955876 | -0.315046569  | 4.933833571   |  |
| O   |              |               |               |  |
| 425 | -3.689801964 | -0.555510623  | 8.471254463   |  |
| O   |              |               |               |  |
| 426 | -1.558613991 | -3.946687567  | 9.434757701   |  |
| O   |              |               |               |  |
| 427 | 1.388361639  | -3.763151352  | 6.269819277   |  |
| O   |              |               |               |  |
| 428 | 1.951201105  | -0.161865903  | 5.816418750   |  |
| O   |              |               |               |  |
| 429 | 1.058561840  | 1.332105042   | 9.138248555   |  |
| O   |              |               |               |  |
| 430 | 0.983260188  | -0.684302364  | 11.996418605  |  |
| O   |              |               |               |  |
| 431 | 5.843341777  | -10.970613111 | 2.688524155   |  |
| O   |              |               |               |  |
| 432 | 6.660385510  | -8.314018292  | 6.373560308   |  |
| O   |              |               |               |  |
| 433 | 10.699019593 | -5.697283072  | 5.533883406   |  |
| O   |              |               |               |  |
| 434 | -5.837220809 | -0.388253432  | -0.375605413  |  |
| O   |              |               |               |  |
| 435 | -3.851338676 | -4.184077028  | -4.254971161  |  |
| O   |              |               |               |  |
| 436 | -6.802604707 | 3.159675126   | -0.990469083  |  |
| O   |              |               |               |  |
| 437 | -5.734193500 | 3.563949233   | -3.845358129  |  |
| O   |              |               |               |  |
| 438 | -9.730859954 | 2.432468100   | 1.462968908   |  |
| O   |              |               |               |  |
| 439 | -5.863442791 | 1.989554820   | 4.029970192   |  |
| O   |              |               |               |  |
| 440 | -4.170355224 | 5.449665977   | 3.547138094   |  |
| O   |              |               |               |  |
| 441 | -6.433523840 | 7.796555979   | 4.895234683   |  |
| O   |              |               |               |  |
| 442 | 10.267543321 | -1.167349124  | 5.221274567   |  |
| O   |              |               |               |  |
| 443 | 3.485829352  | 4.197894252   | 4.313320385   |  |
| O   |              |               |               |  |
| 444 | 4.332026605  | 8.027513595   | -0.185817887  |  |
| O   |              |               |               |  |
| 445 | 2.115774739  | 9.881057954   | -3.378977043  |  |
| O   |              |               |               |  |
| 446 | -0.736265336 | 7.252368749   | -1.556704600  |  |
| O   |              |               |               |  |
| 447 | -0.397037771 | 7.256186055   | 2.162254691   |  |
| O   |              |               |               |  |
| 448 | 2.593782311  | 5.475442614   | 1.854493781   |  |
| O   |              |               |               |  |
| 449 | 1.676799557  | 11.441888611  | 2.520623140   |  |
| O   |              |               |               |  |
| 450 | -1.272266727 | 13.782384121  | 0.577102027   |  |
| O   |              |               |               |  |
| 451 | -2.160975603 | 11.328603059  | -1.516335123  |  |
| O   |              |               |               |  |
| 452 | -3.983876285 | 14.115749951  | 3.337461331   |  |

|  |     |              |               |              |
|--|-----|--------------|---------------|--------------|
|  | O   |              |               |              |
|  | 453 | -4.725201687 | 7.307276778   | -1.703267369 |
|  | O   |              |               |              |
|  | 454 | 2.023095762  | -4.662469998  | -8.521418164 |
|  | O   |              |               |              |
|  | 455 | 0.452678681  | -0.726985831  | -8.462743685 |
|  | O   |              |               |              |
|  | 456 | 3.077303548  | 3.464960472   | -8.039879135 |
|  | O   |              |               |              |
|  | 457 | 6.850048918  | 3.907199683   | -8.413572798 |
|  | O   |              |               |              |
|  | 458 | -4.398395706 | -2.167442503  | -9.288267437 |
|  | O   |              |               |              |
|  | 459 | -1.585372458 | -6.480688533  | -6.108520256 |
|  | O   |              |               |              |
|  | 460 | 0.448263450  | -5.770129649  | -6.690463634 |
|  | O   |              |               |              |
|  | 461 | -2.940262271 | 2.671602985   | -8.656422213 |
|  | O   |              |               |              |
|  | 462 | 9.609671483  | -6.354095845  | -2.845304779 |
|  | O   |              |               |              |
|  | 463 | 12.007256087 | -8.112239019  | -1.034328138 |
|  | O   |              |               |              |
|  | 464 | -0.266716877 | -6.177060775  | -1.278646824 |
|  | O   |              |               |              |
|  | 465 | -1.096957626 | -7.100623102  | 0.610319582  |
|  | O   |              |               |              |
|  | 466 | 4.238525240  | -11.319273477 | -2.872986209 |
|  | O   |              |               |              |
|  | 467 | 1.997456586  | -11.113759685 | -3.101647530 |
|  | O   |              |               |              |
|  | 468 | 4.469264457  | -6.210310009  | -0.849996751 |
|  | O   |              |               |              |
|  | 469 | 4.166560628  | -7.921746466  | 0.568911549  |
|  | O   |              |               |              |
|  | 470 | 2.065636148  | -6.300749302  | -1.849689176 |
|  | O   |              |               |              |
|  | 471 | 8.135870407  | -7.431608495  | 1.741543072  |
|  | O   |              |               |              |
|  | 472 | 6.509554707  | -5.263155611  | 0.864880720  |
|  | O   |              |               |              |
|  | 473 | -3.744556019 | 5.116538967   | -2.778396148 |
|  | O   |              |               |              |
|  | 474 | 6.793692287  | -11.141571213 | -1.852688552 |
|  | O   |              |               |              |
|  | 475 | 6.529168604  | -9.354542936  | 0.542015537  |
|  | O   |              |               |              |
|  | 476 | 4.031452535  | 4.627332584   | -1.871522517 |
|  | S   |              |               |              |
|  | 477 | 2.498696645  | 1.671265130   | -3.249094652 |
|  | S   |              |               |              |
|  | 478 | 2.041267978  | -3.437760737  | -3.507378224 |
|  | S   |              |               |              |
|  | 479 | 3.467700763  | 1.404932322   | 0.275826878  |
|  | S   |              |               |              |
|  | 480 | 0.342417938  | -1.205596282  | -1.129956436 |
|  | S   |              |               |              |
|  | 481 | 4.548519522  | -1.053259723  | -5.081624297 |
|  | S   |              |               |              |
|  | 482 | 2.916019507  | -3.673698008  | 0.067991026  |
|  | S   |              |               |              |
|  | 483 | 5.966625035  | 1.272082766   | -2.286597773 |
|  | S   |              |               |              |
|  | 484 | 5.595415138  | -3.639740545  | -2.526750876 |
|  | S   |              |               |              |
|  | 485 | 6.045222455  | -1.457366813  | 0.411522786  |
|  | S   |              |               |              |
|  | end |              |               |              |
